# Supplementary material
Source: PubMed Central journal article supplement (PMC2424287)

**Figure S10. Sequenced Structural Variation and Gene Structure.** A graphical representation for sequenced sites (n=266) of structural variation (miropeats view) is provided. Each alignment compares the human reference genome (top) with the sequenced structure of the fosmid clone (threshold s=400). RefGene exons are shown as red bars above the human genome reference. Duplication and repeat content/orientation are shown using colored arrows (LINE=green, SINE=purple, transposon=orange, grey/blue=segmental duplications).

Clone: ABC9\_43852100\_D22 Accession: AC204974

ESP Prediction: S Validation: I Mechanism: NAHR

Other Simple Repeat Low Complexity DNA LTR LINE SINE

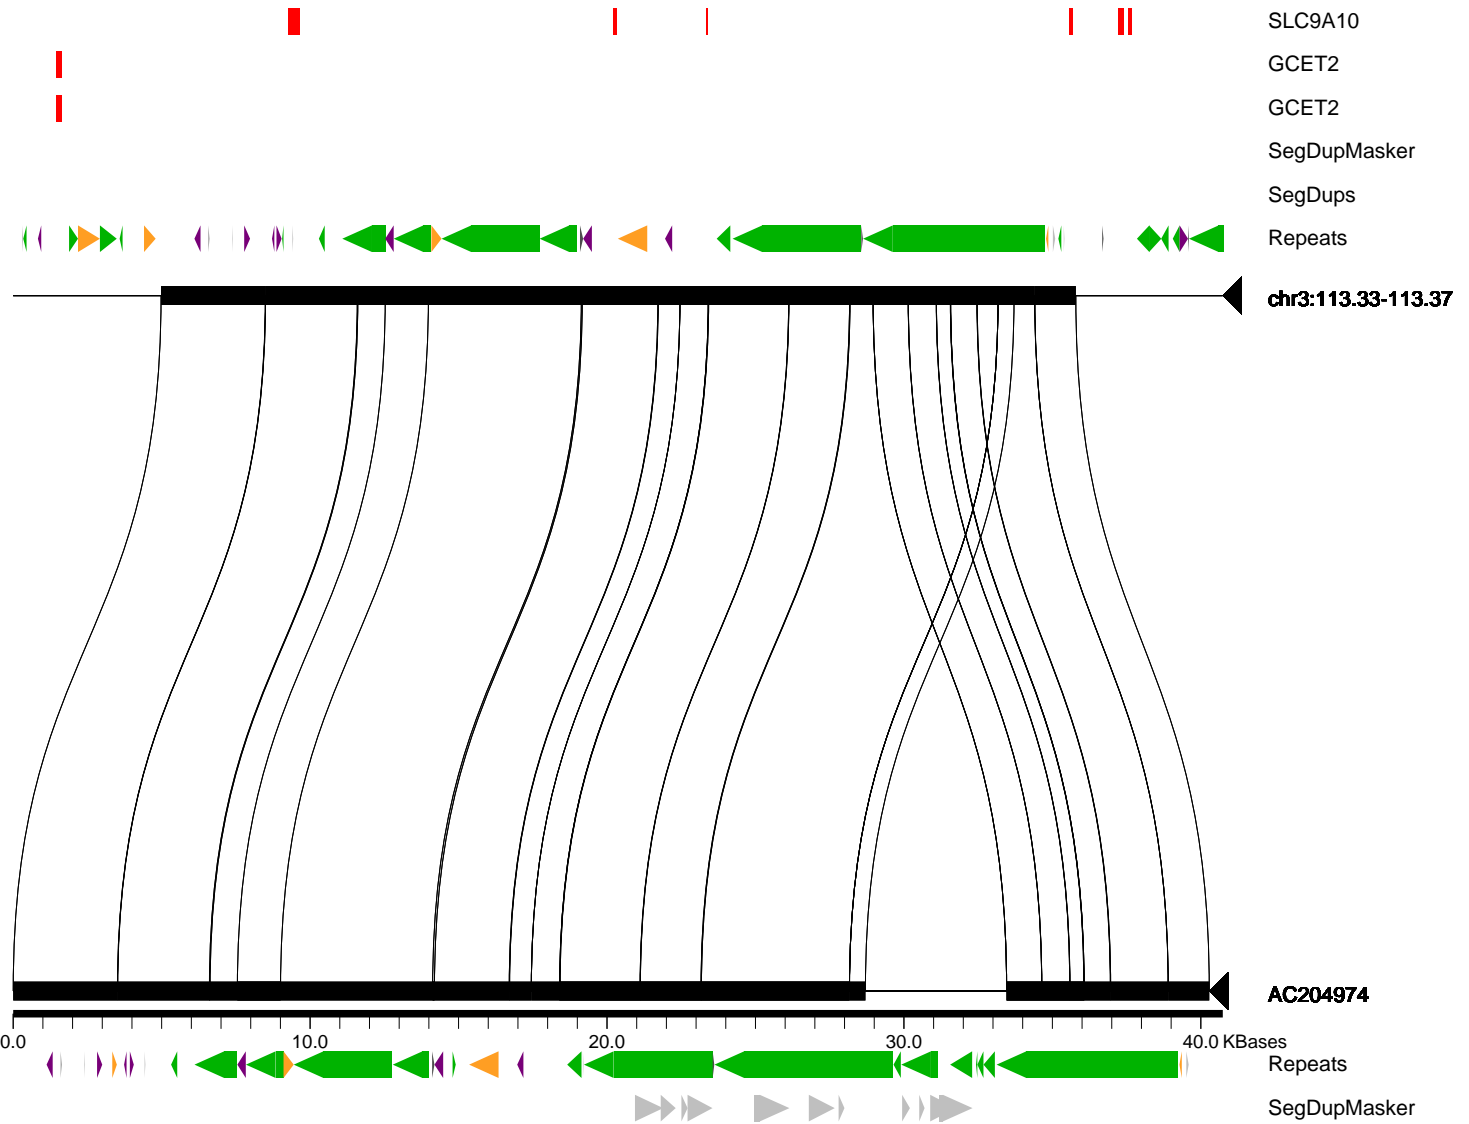

Clone: ABC9\_43872100\_H12 Accession: AC204973

ESP Prediction: B Validation: D Mechanism: NAHR

Other Simple Repeat Low Complexity DNA LTR LINE SINE

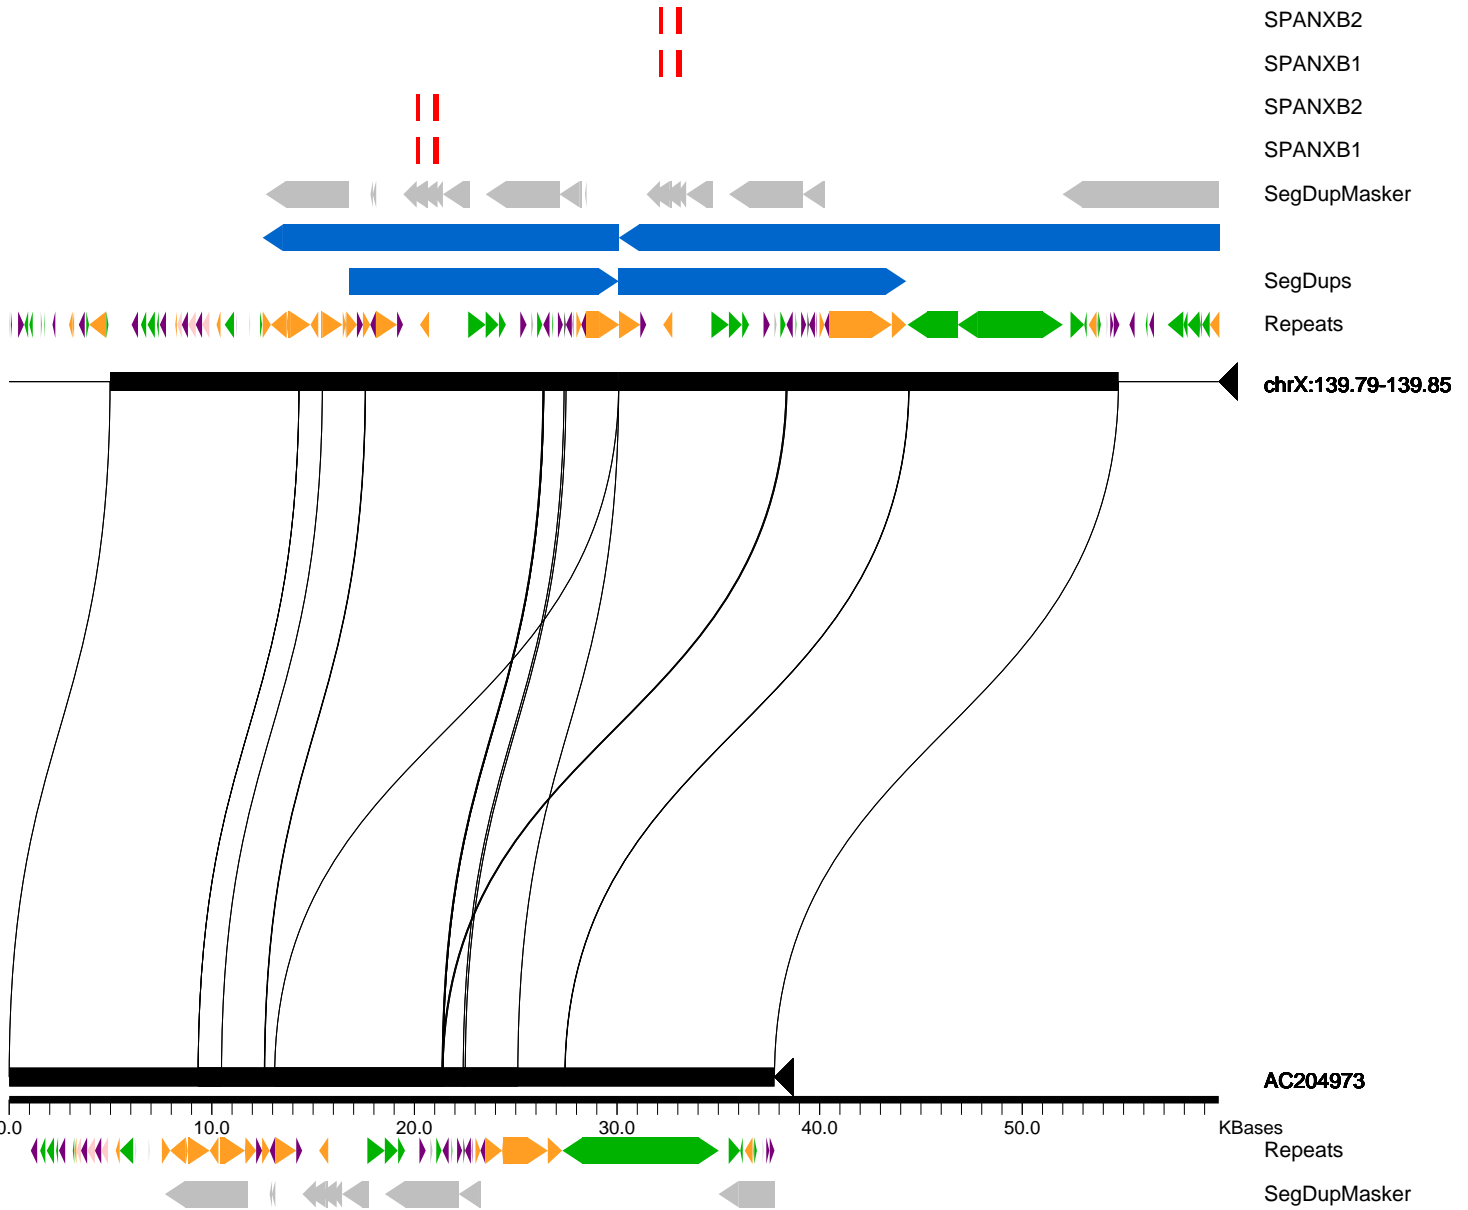

Clone: ABC10\_44457100\_B22 Accession: AC203656

ESP Prediction: S Validation: I Mechanism: NAHR

Other Simple Repeat Low Complexity DNA LTR LINE SINE

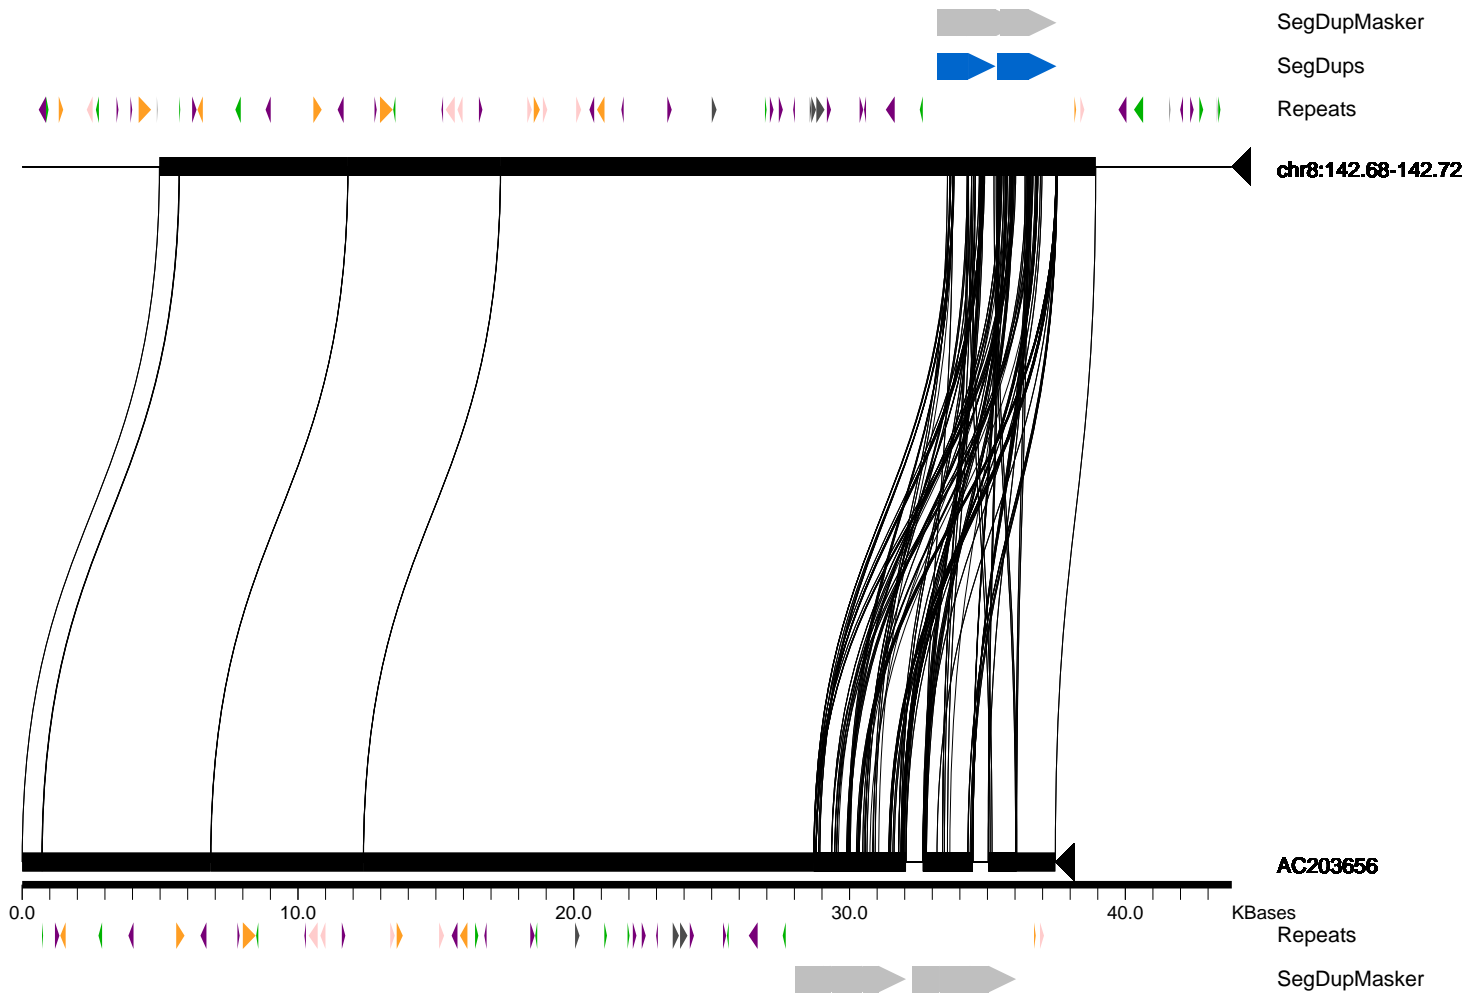

Clone: ABC10\_44464600\_H12 Accession: AC203652

ESP Prediction: B Validation: D Mechanism: NAHR

Other Simple Repeat Low Complexity DNA LTR LINE SINE

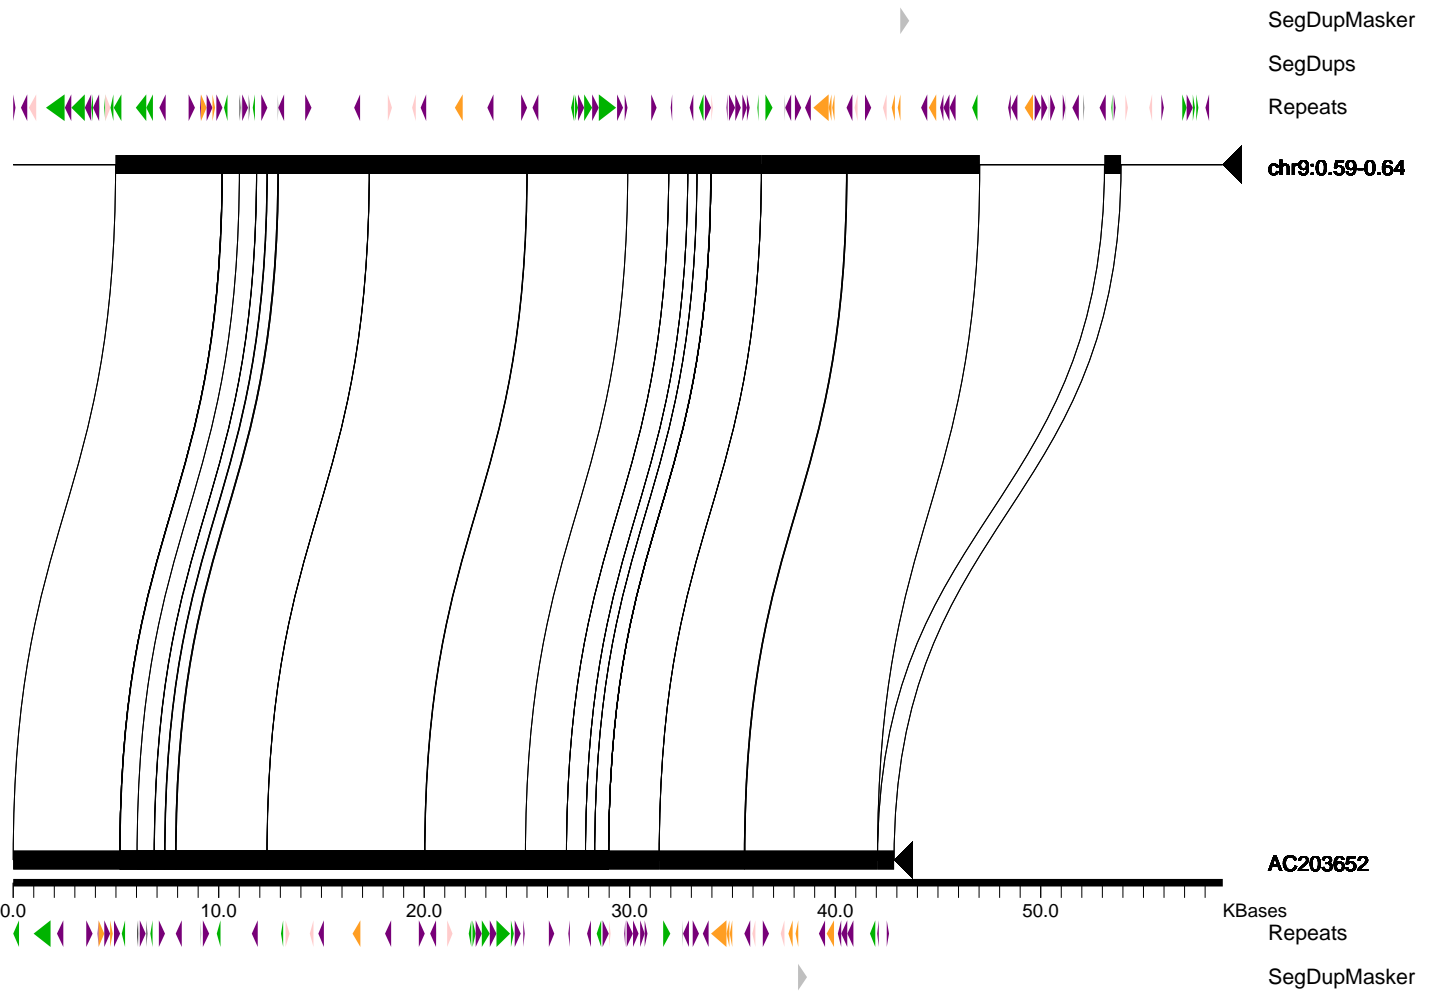

Clone: ABC10\_45488200\_E6 Accession: AC203637

ESP Prediction: S Validation: I Mechanism: NAHR

Other Simple Repeat Low Complexity DNA LTR LINE SINE

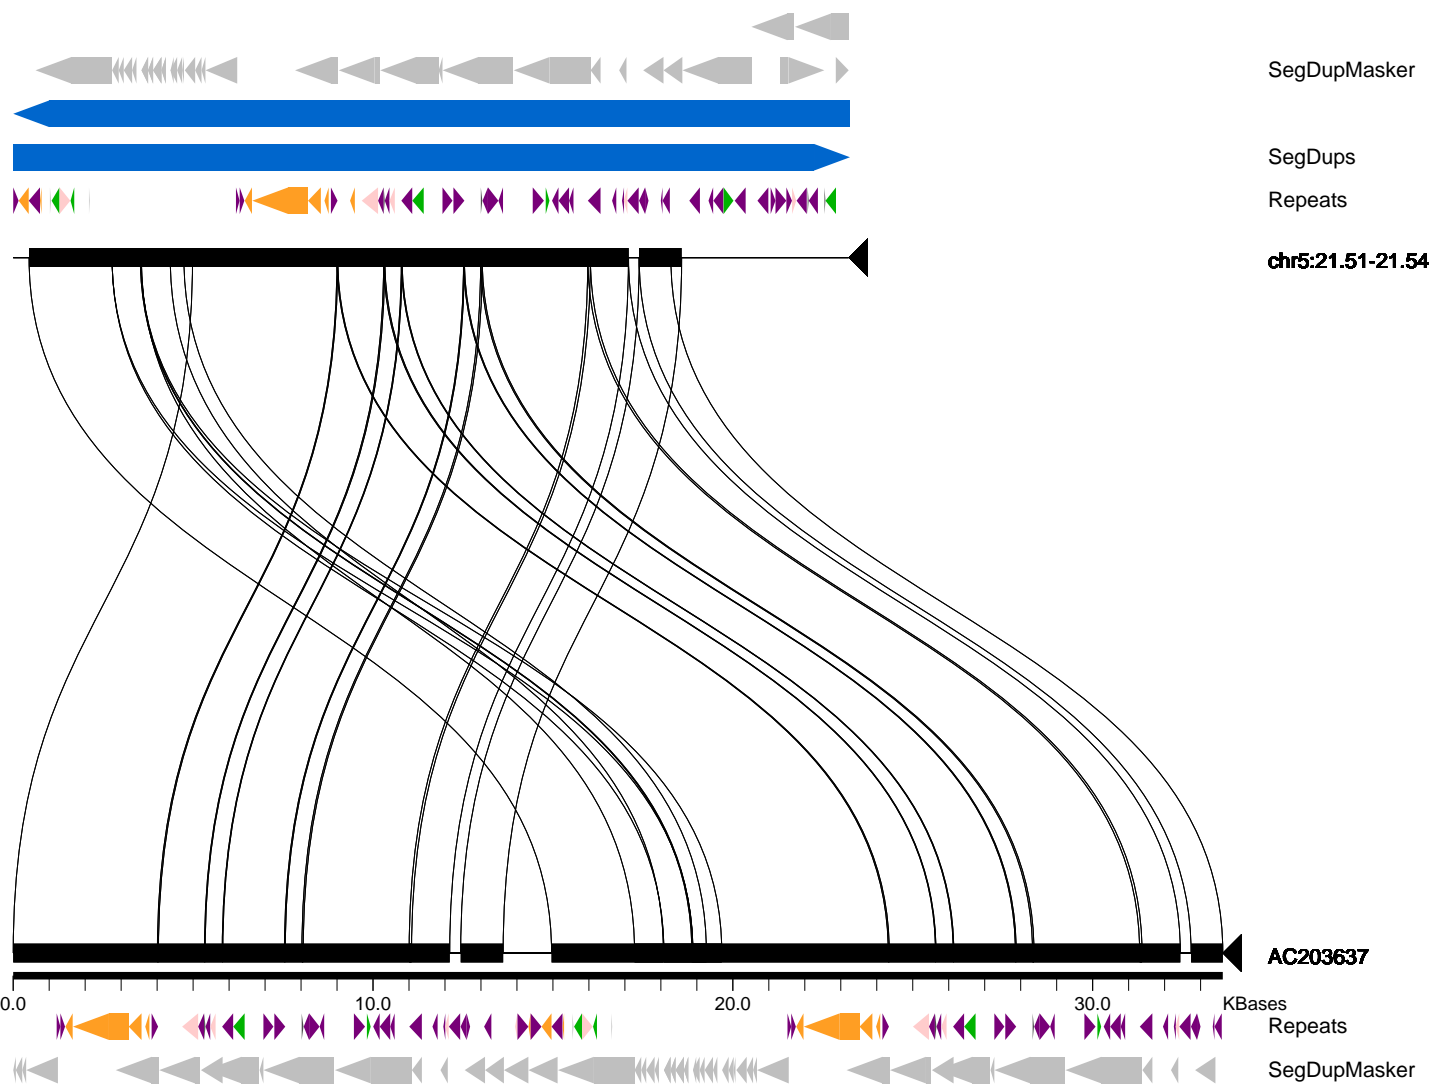

Clone: ABC10\_45493900\_H4 Accession: AC203653

ESP Prediction: B Validation: D Mechanism: NAHR

Other Simple Repeat Low Complexity DNA LTR LINE SINE

SegDupMasker

SegDups

Repeats

chr4:139.79-139.85

AC203653

KBases

Repeats

SegDupMasker

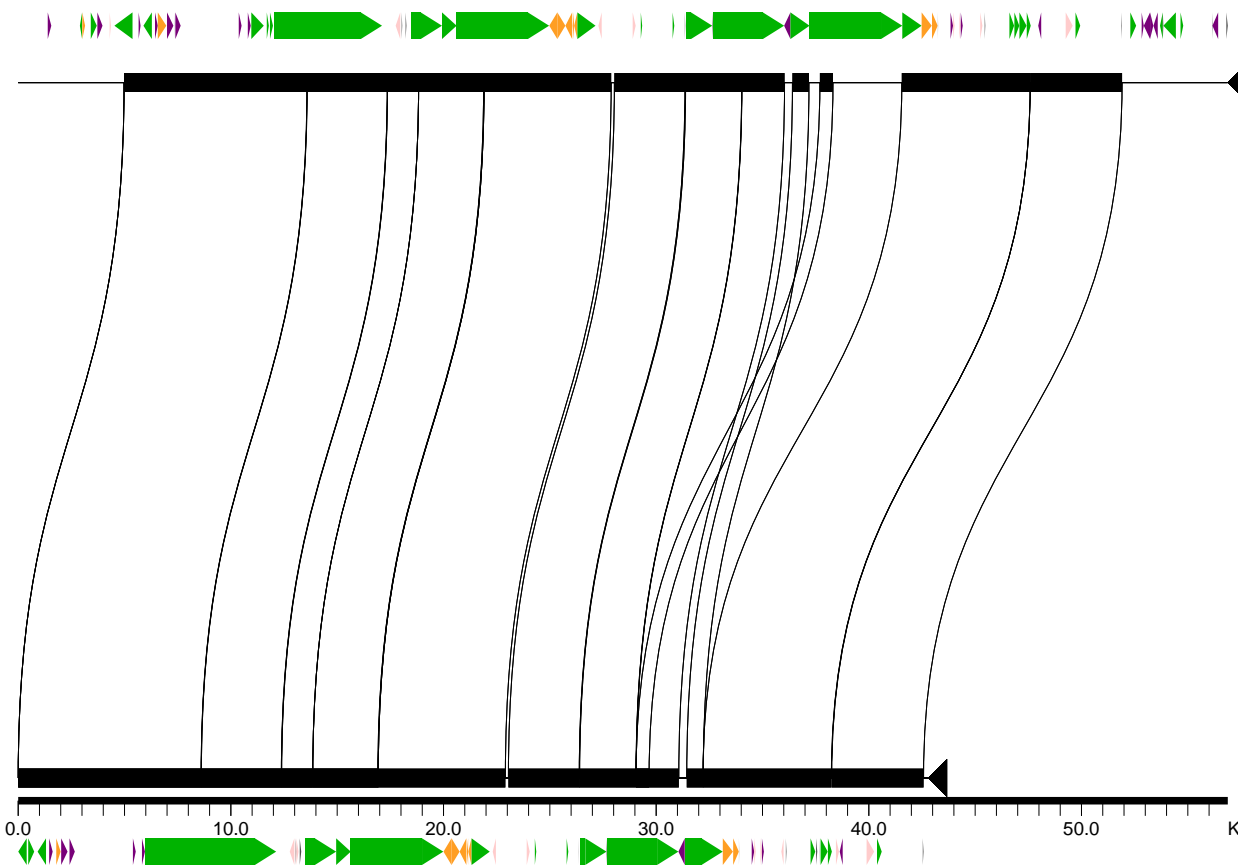

Clone: ABC10\_45515900\_C13 Accession: AC203646

ESP Prediction: S Validation: I Mechanism: NAHR?

Other Simple Repeat Low Complexity DNA LTR LINE SINE

BAGE

BAGE5

BAGE3

BAGE4

BAGE2

SegDupMasker

SegDups

Repeats

chr21:10.10-10.15

AC203646

KBases

Repeats

SegDupMasker

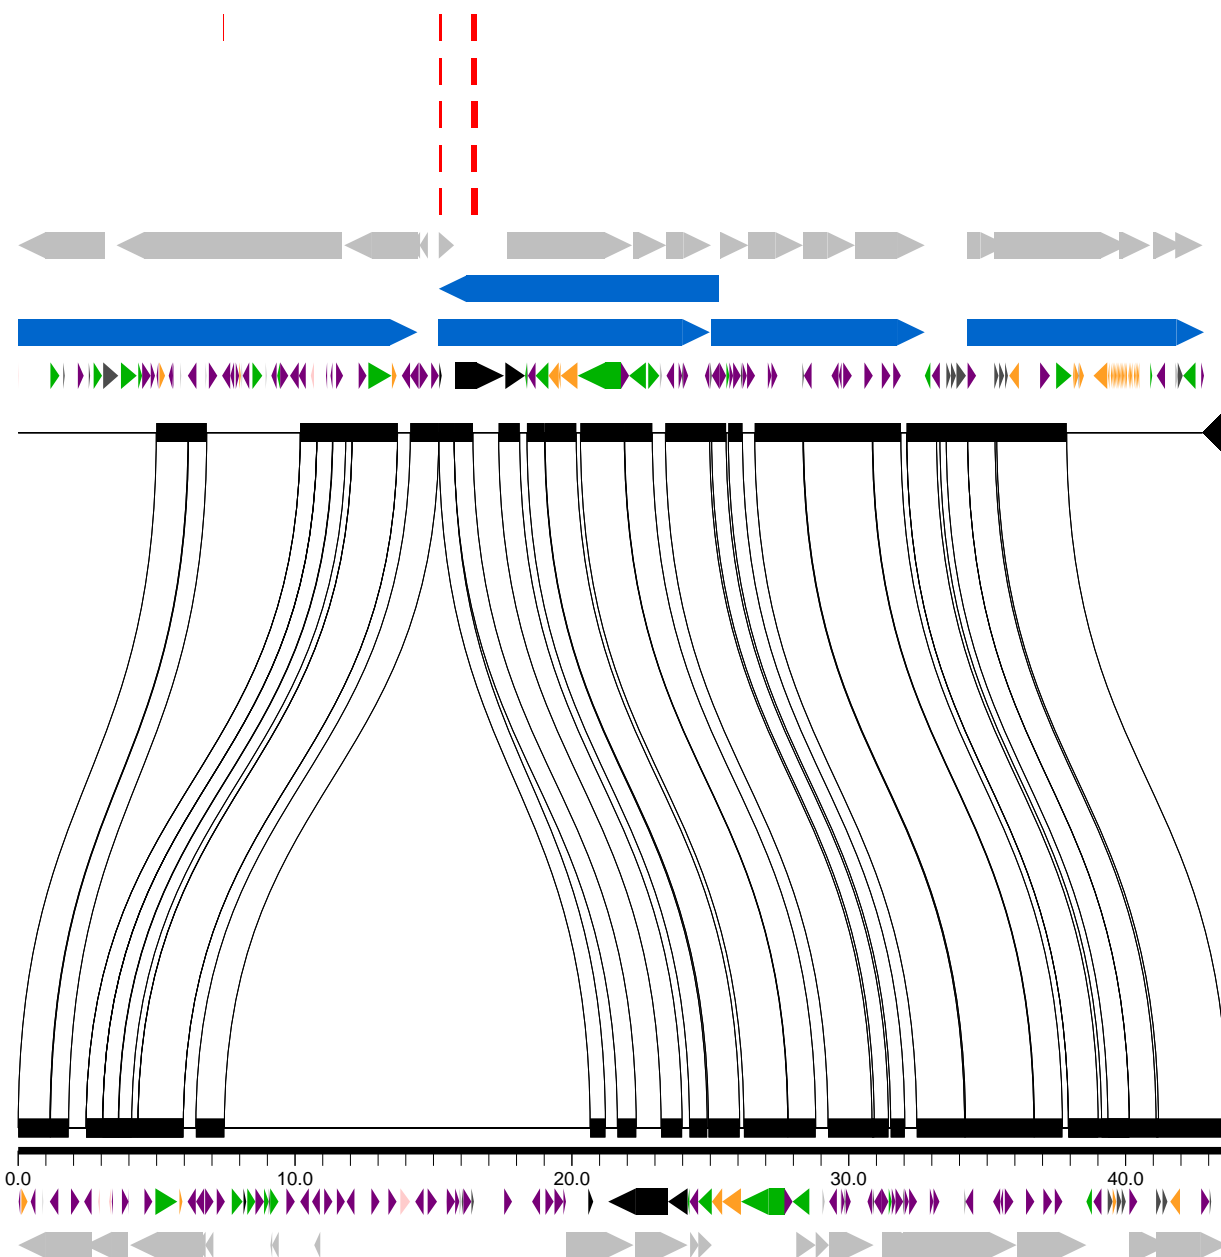



Clone: ABC10\_45523400\_D1 Accession: AC203610

ESP Prediction: S Validation: I Mechanism: NAHR

Other Simple Repeat Low Complexity DNA LTR LINE SINE

SegDupMasker

SegDups

Repeats

chr11:25.18-25.22

AC203610

KBases  
Repeats

SegDupMasker

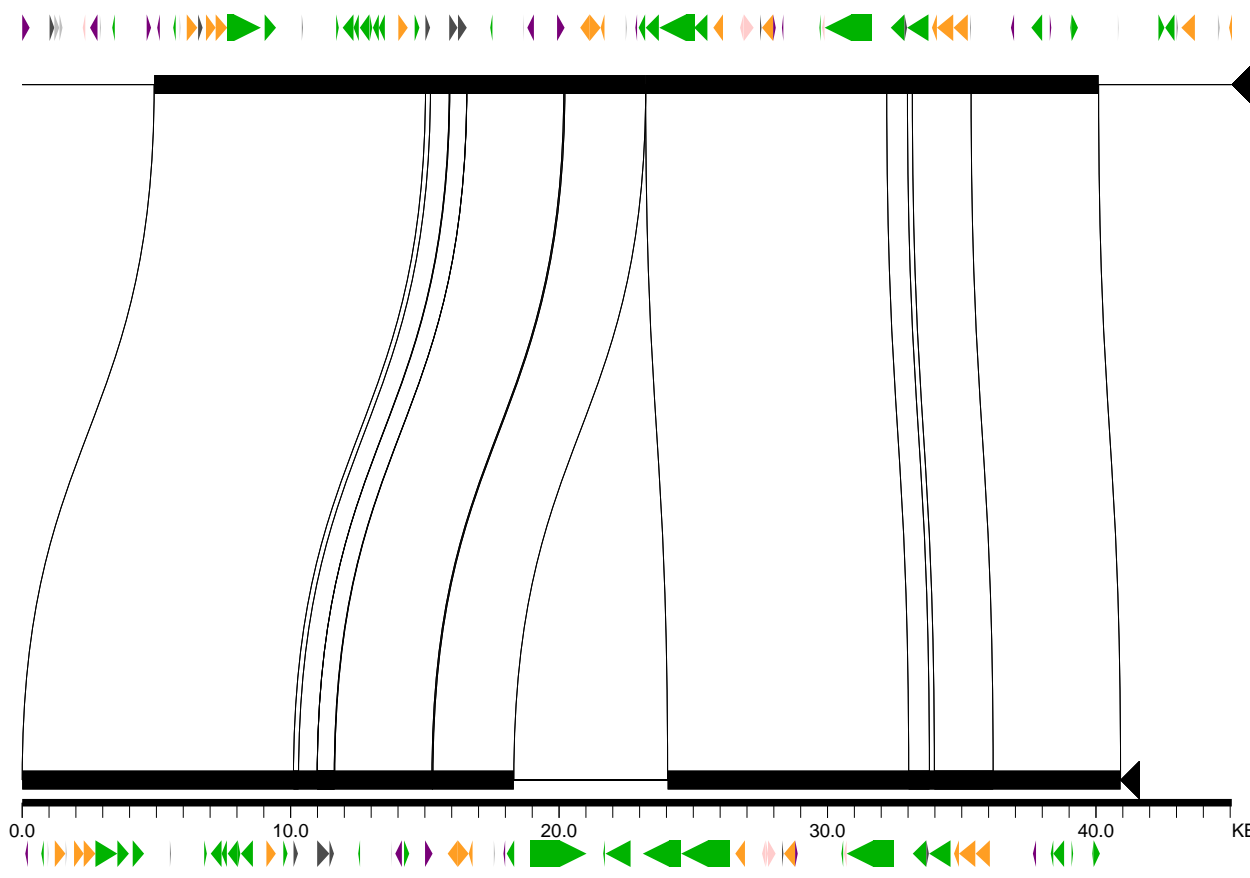

Clone: ABC10\_45527300\_K20 Accession: AC203640

ESP Prediction: S Validation: I Mechanism: NAHR

Other Simple Repeat Low Complexity DNA LTR LINE SINE

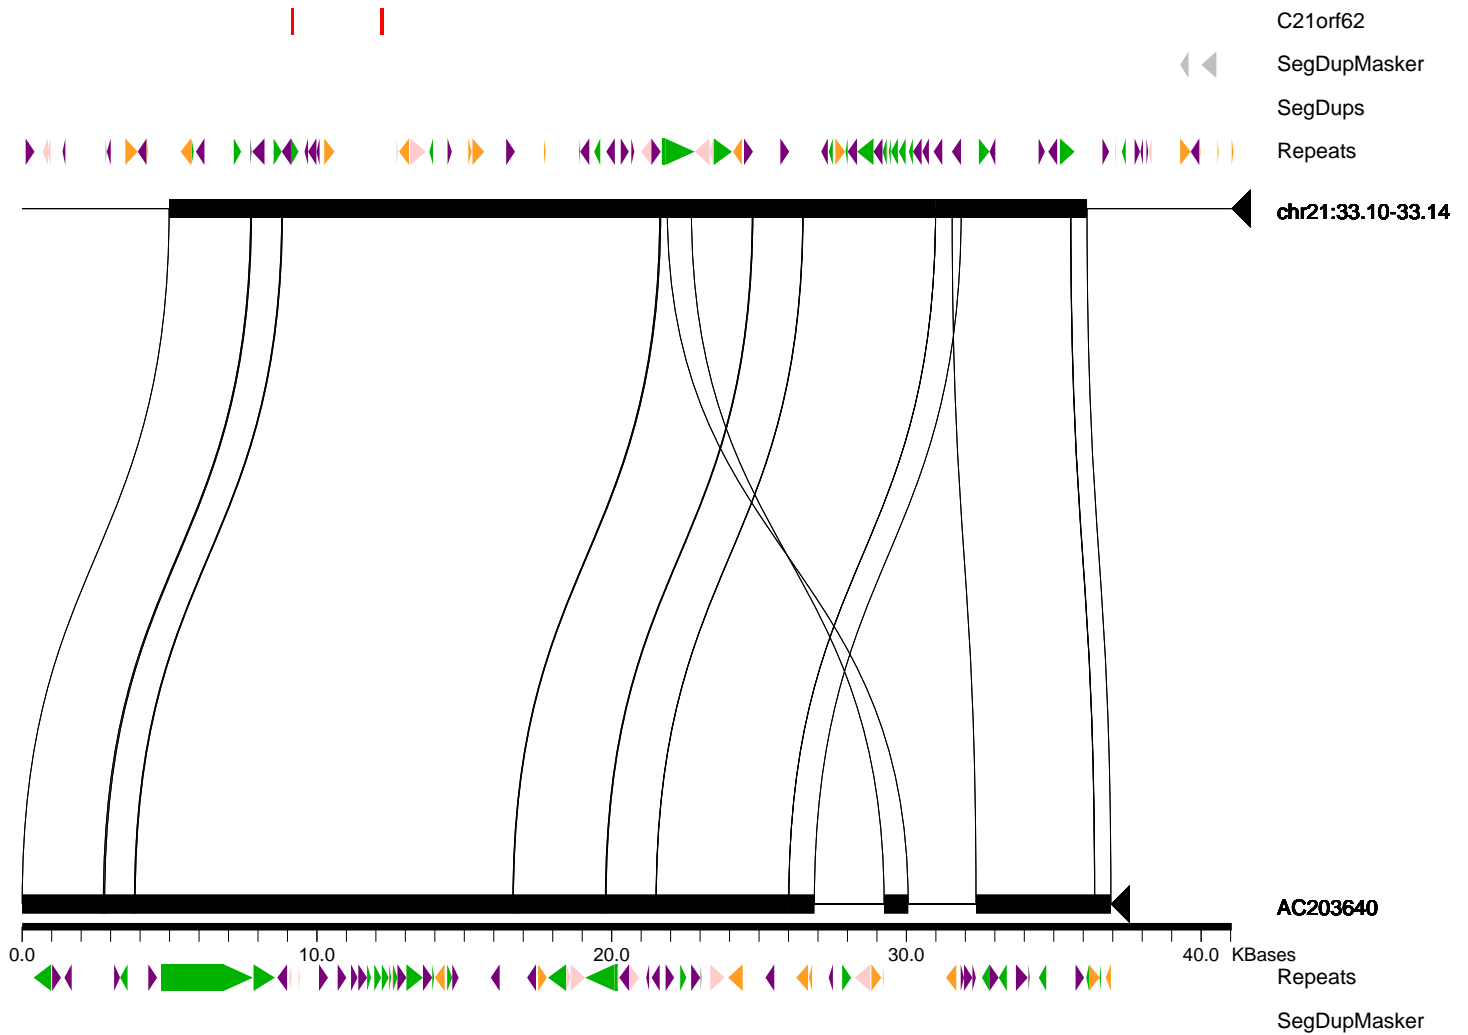

Clone: ABC10\_45534600\_M1 Accession: AC203657

ESP Prediction: S Validation: I Mechanism: NAHR

Other Simple Repeat Low Complexity DNA LTR LINE SINE

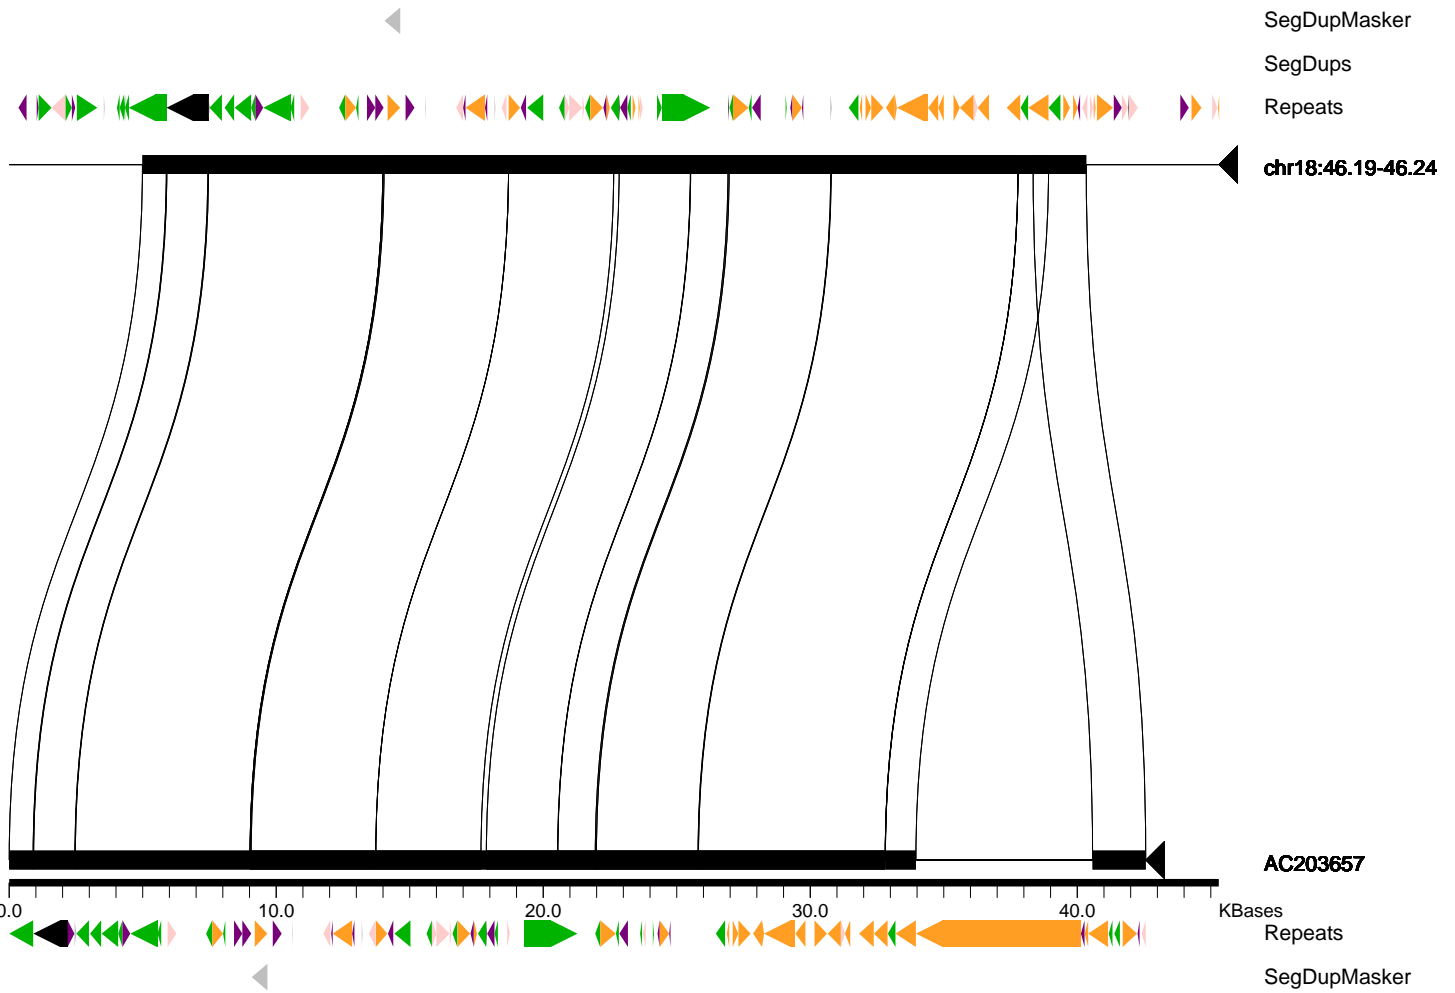

Clone: ABC9\_43938300\_A6 Accession: AC206743

ESP Prediction: S Validation: I Mechanism: NAHR

Other Simple Repeat Low Complexity DNA LTR LINE SINE

SegDupMasker

SegDups

Repeats

chr21:14.70-14.74

AC206743

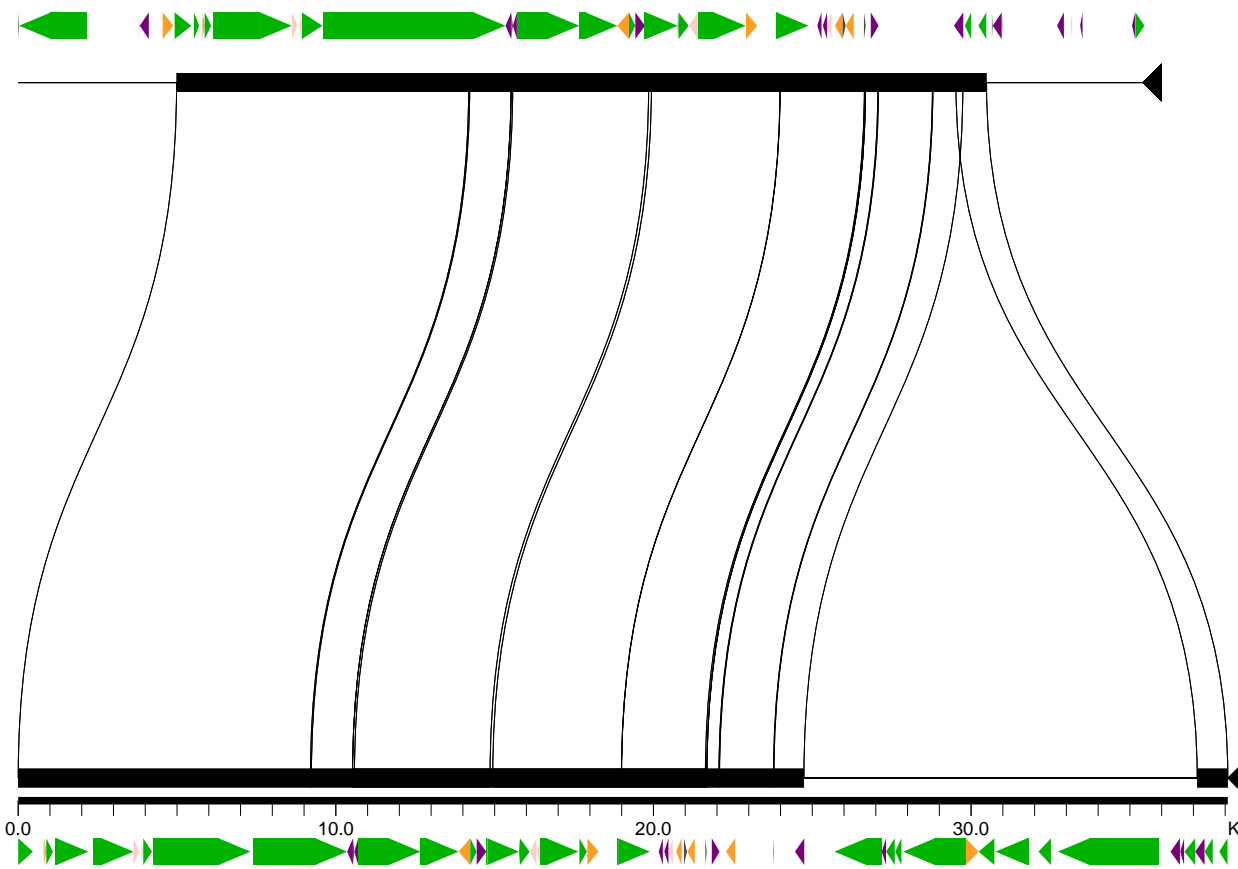

Clone: ABC9\_43993300\_H10 Accession: AC206018

ESP Prediction: S Validation: I Mechanism: NAHR

Other Simple Repeat Low Complexity DNA LTR LINE SINE

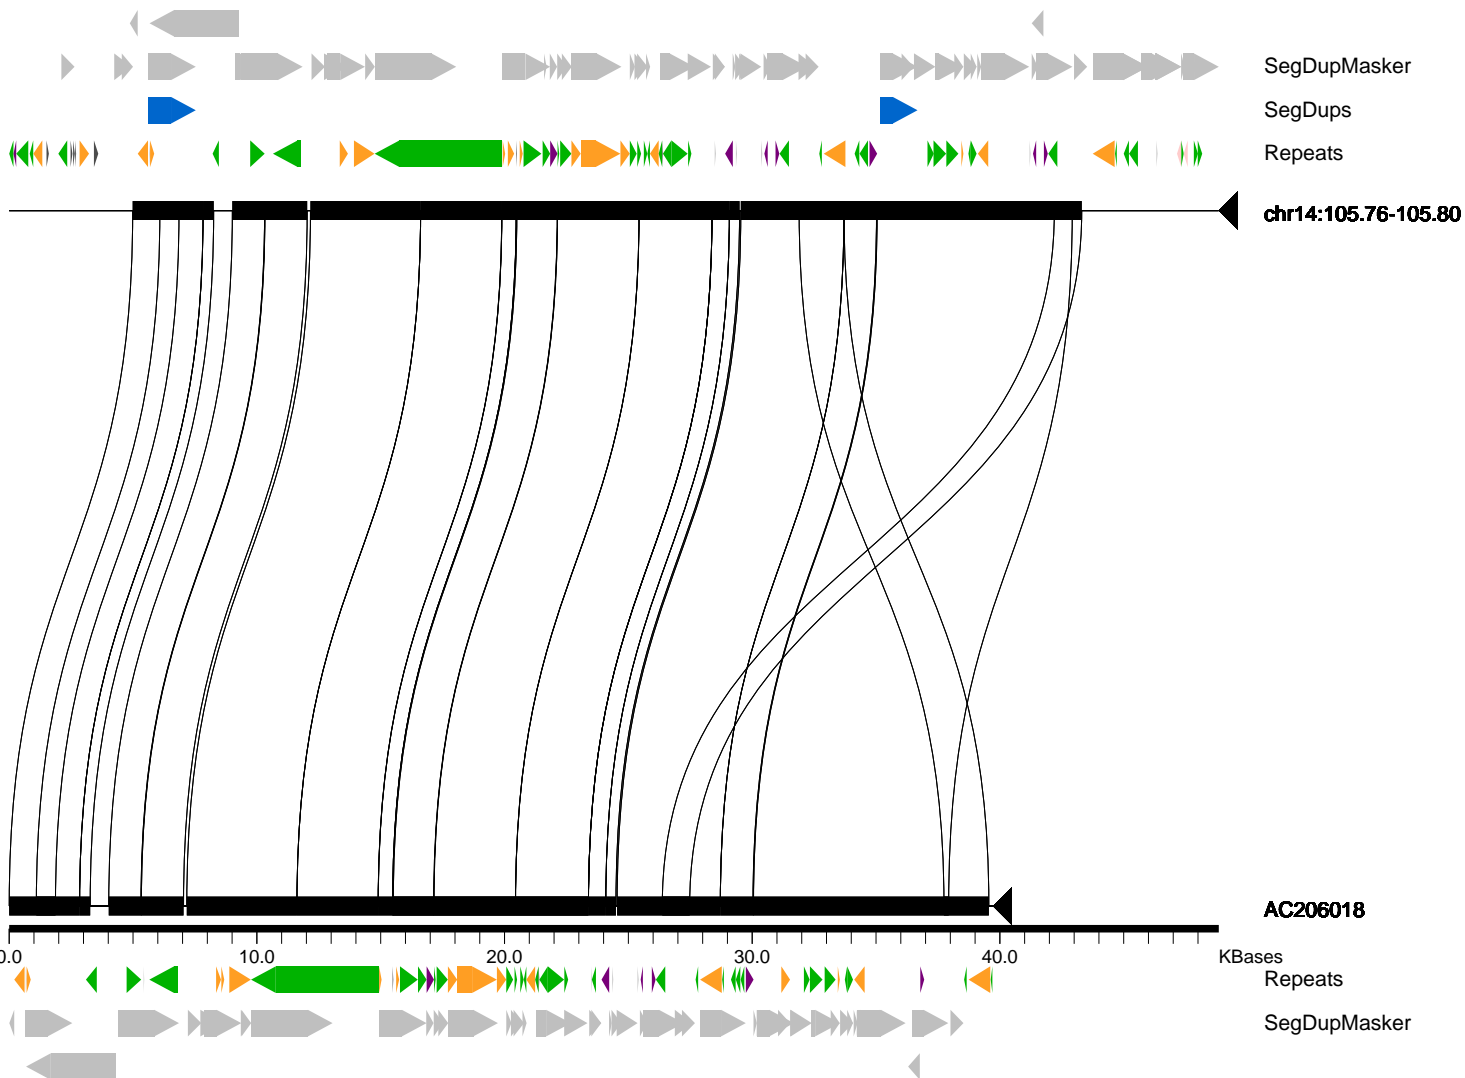

Clone: ABC9\_44001000\_K16 Accession: AC205944

ESP Prediction: B Validation: U Mechanism: NAHR

Other Simple Repeat Low Complexity DNA LTR LINE SINE

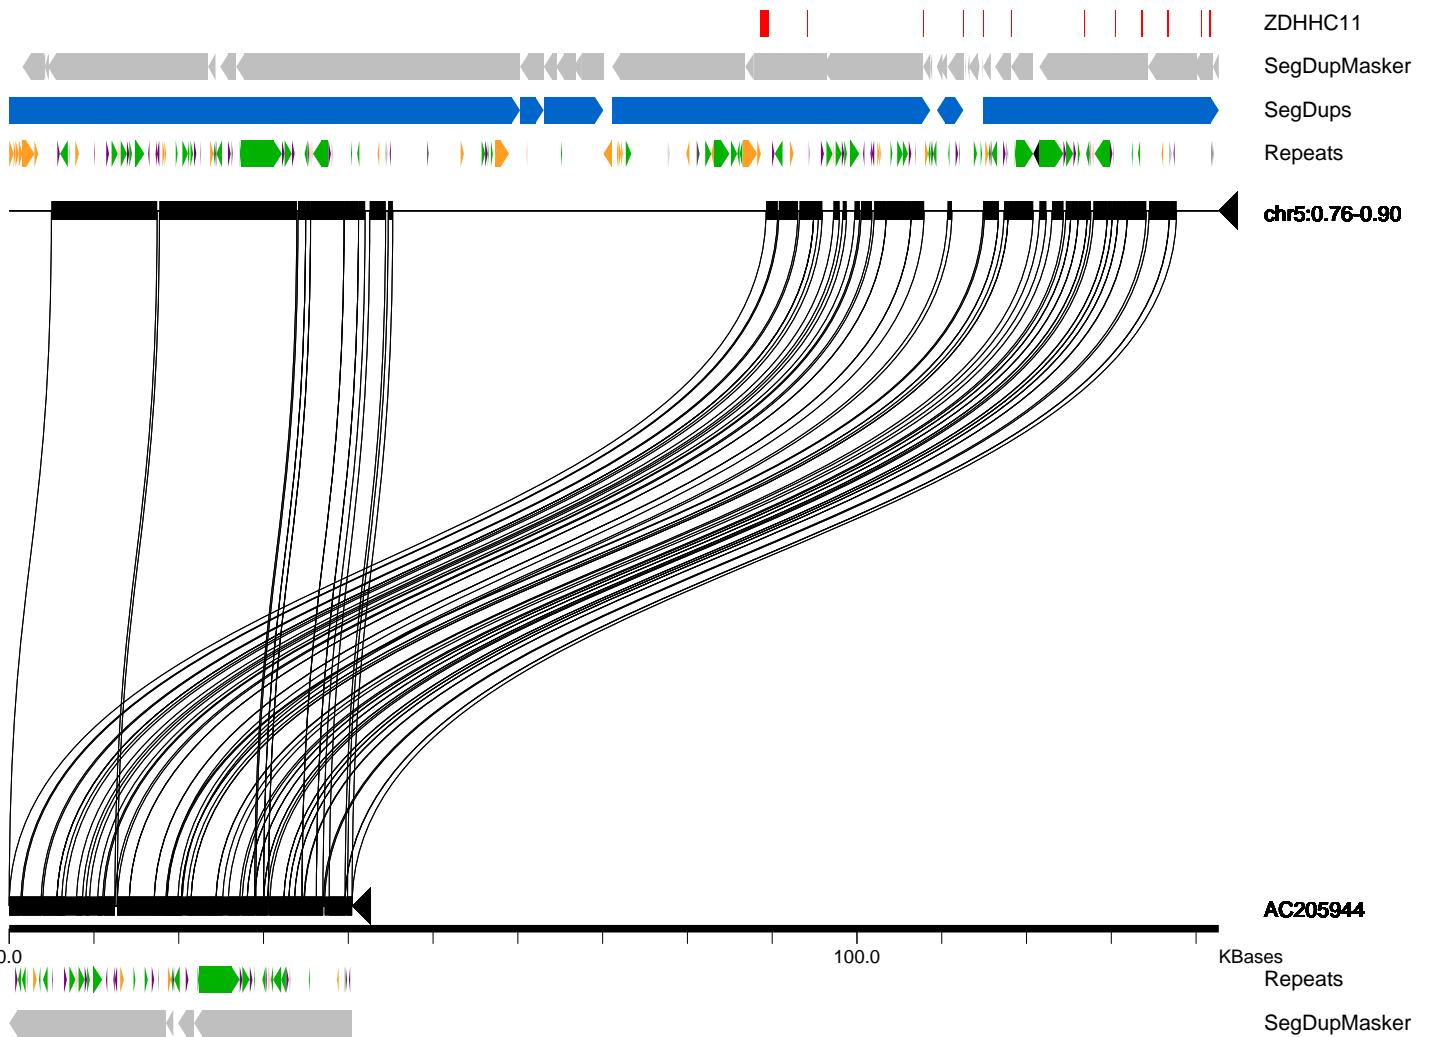

Clone: ABC9\_44033400\_F5 Accession: AC206318  
ESP Prediction: B Validation: D Mechanism: NAHR

Other Simple Repeat Low Complexity DNA LTR LINE SINE

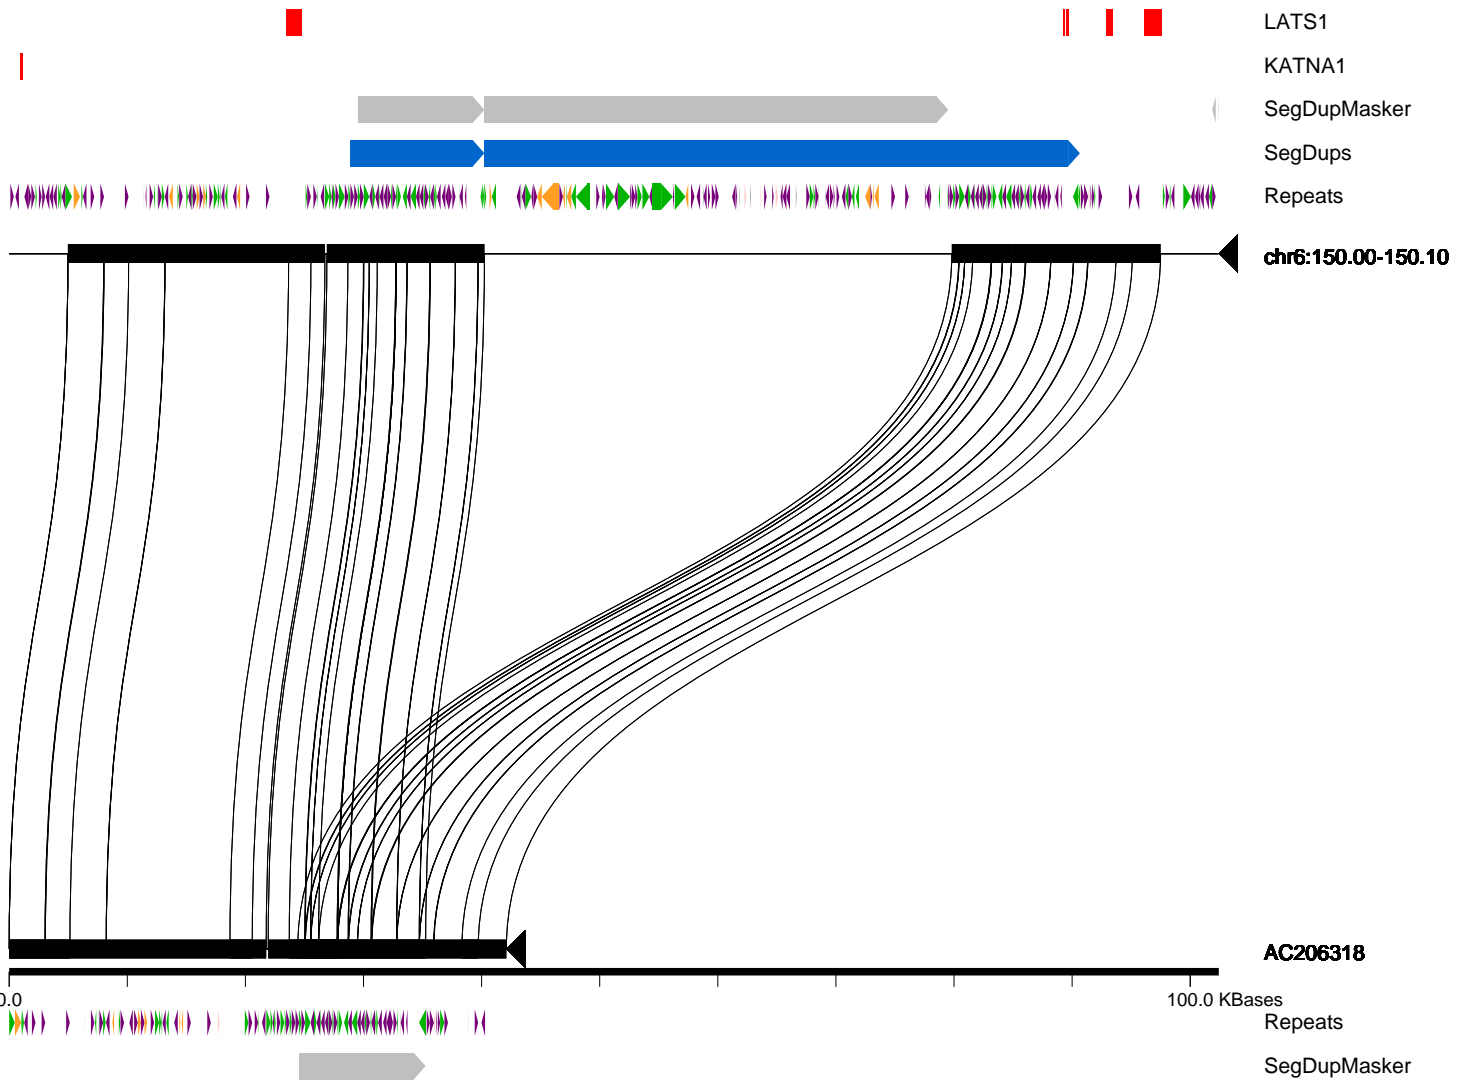

Clone: ABC10\_43644100\_O18 Accession: AC204960

ESP Prediction: S Validation: I Mechanism: NAHR?

Other Simple Repeat Low Complexity DNA LTR LINE SINE

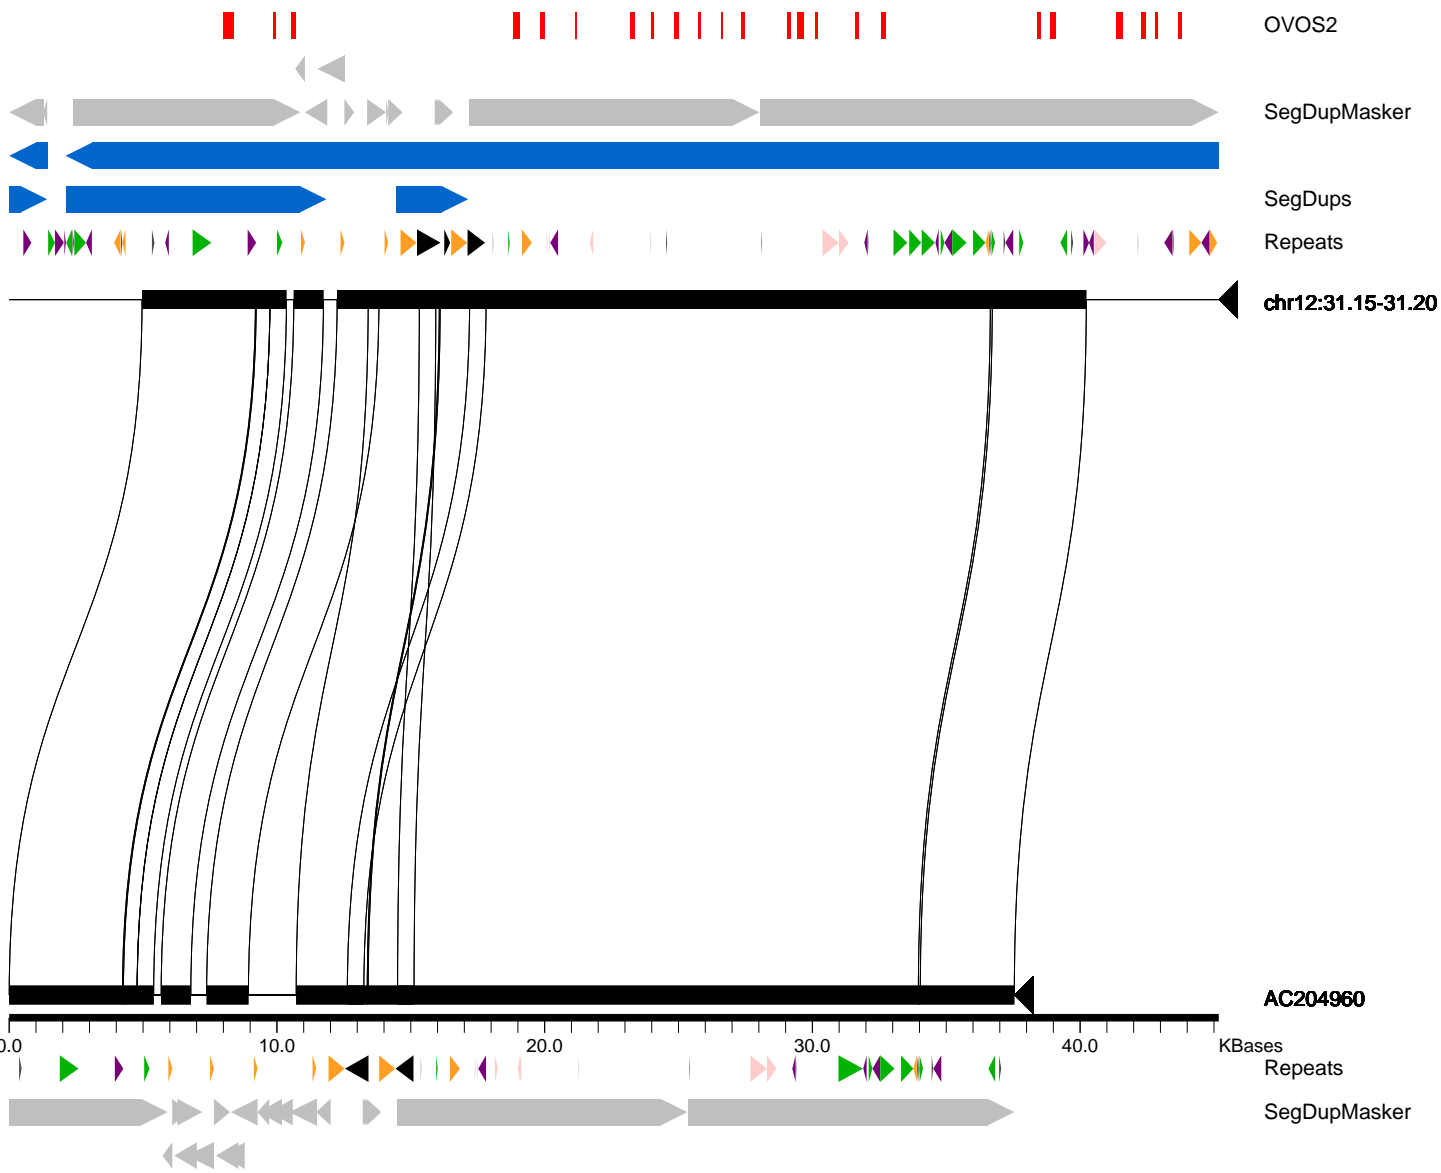



Clone: ABC10\_43661000\_B7 Accession: AC203648

ESP Prediction: S Validation: I Mechanism: NAHR

Other Simple Repeat Low Complexity DNA LTR LINE SINE

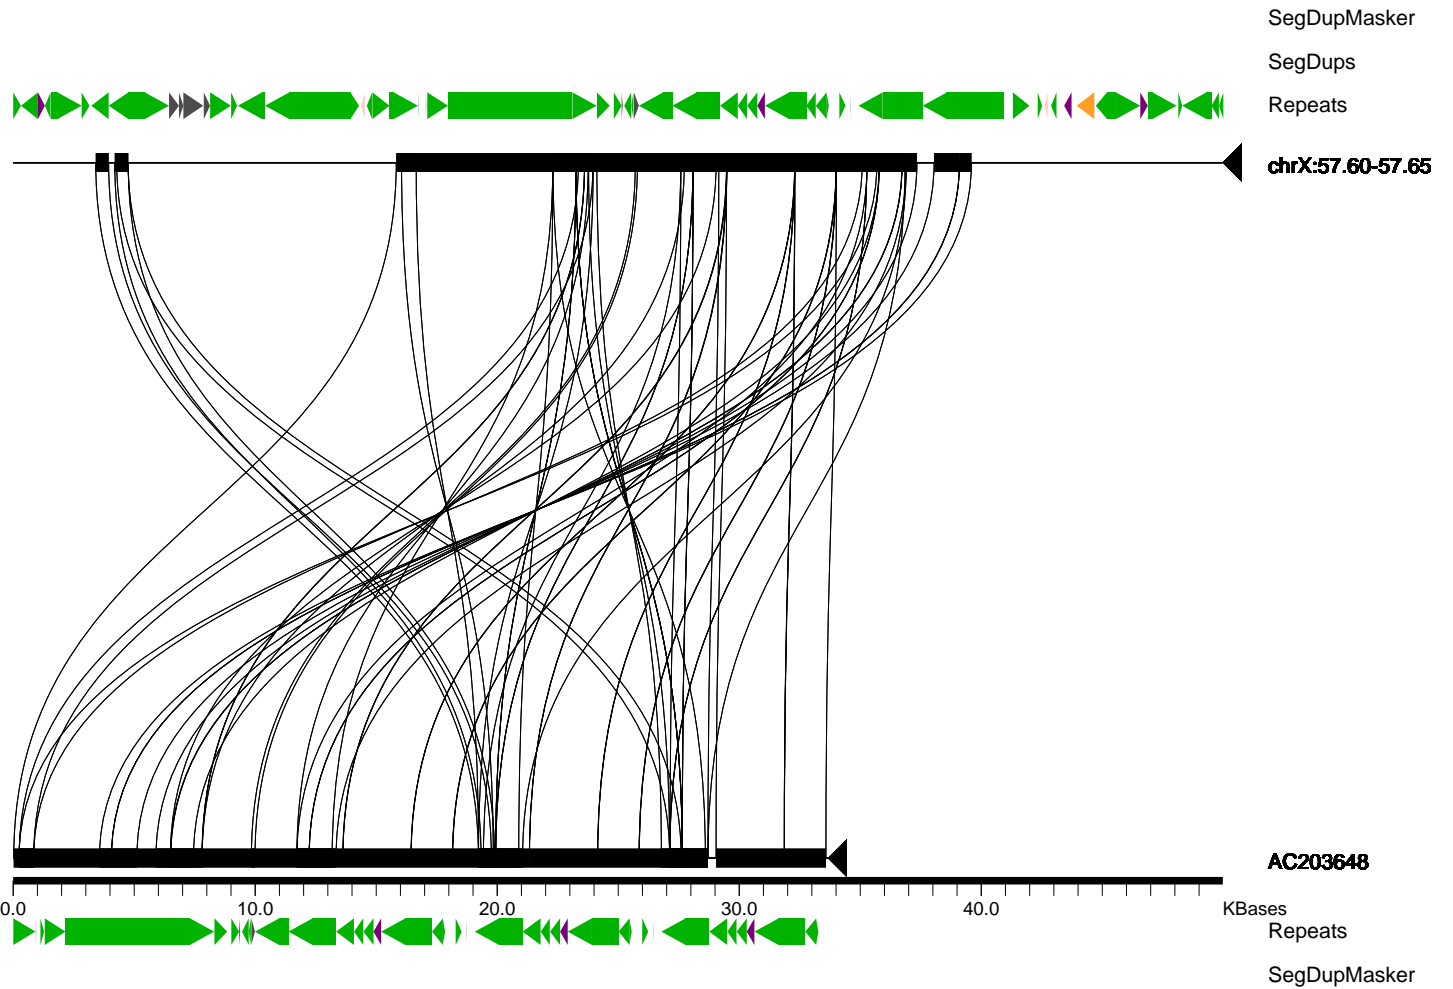

Clone: ABC10\_43661000\_F7 Accession: AC203641

ESP Prediction: S Validation: I Mechanism: NAHR

Other Simple Repeat Low Complexity DNA LTR LINE SINE

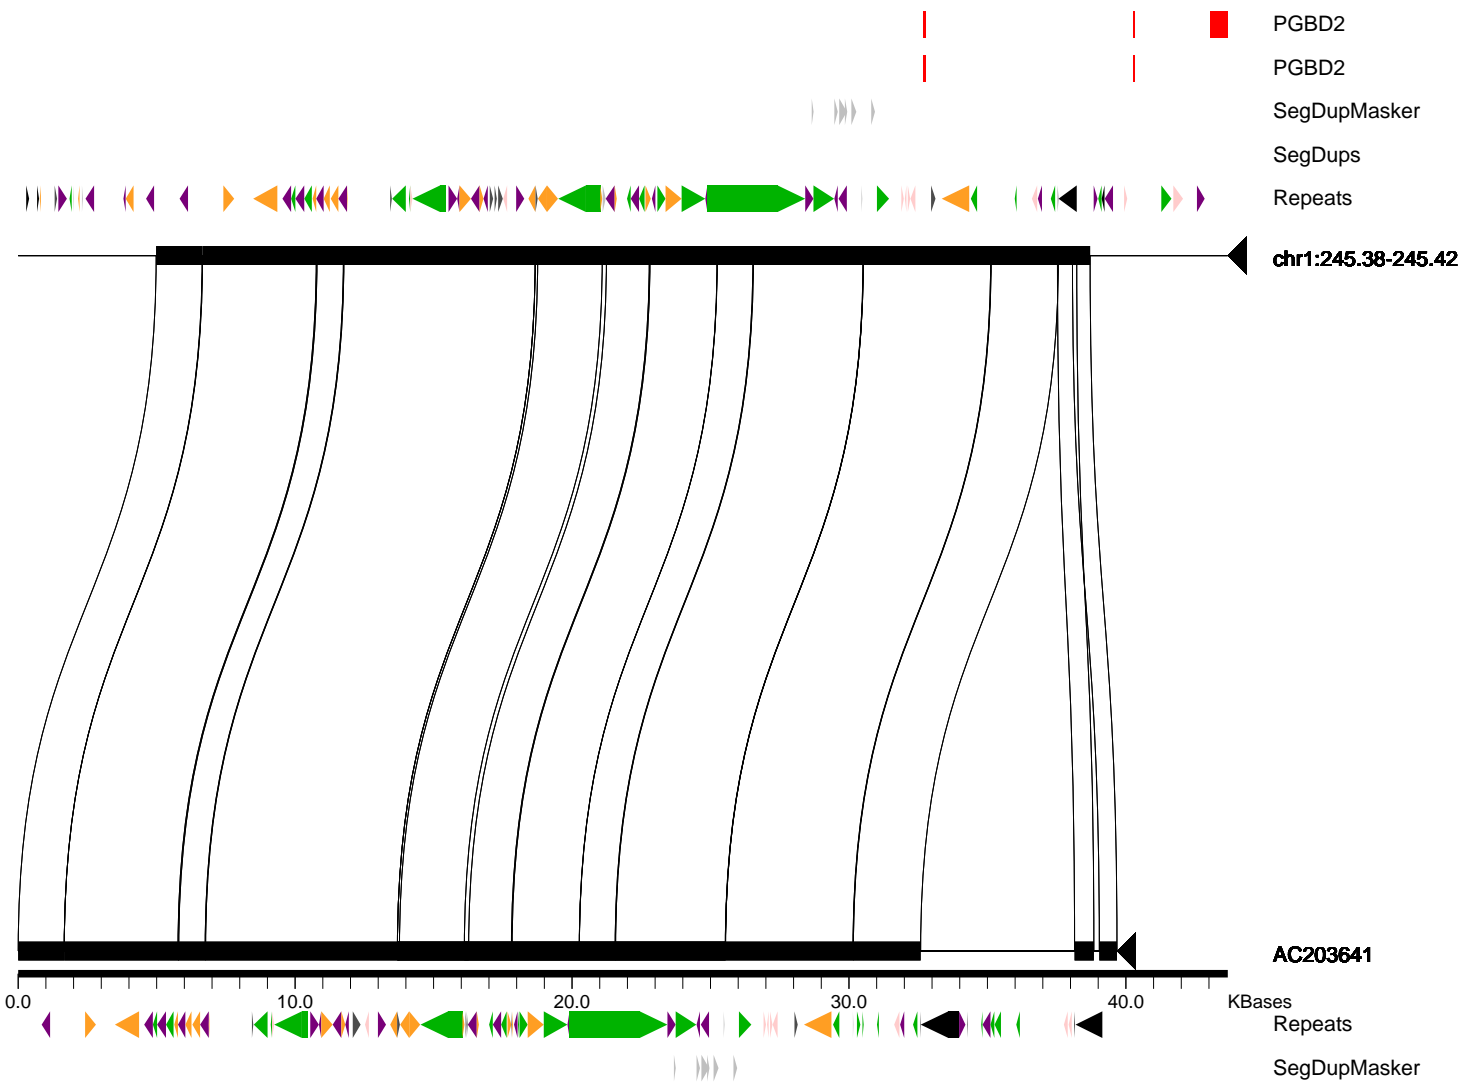

Clone: ABC10\_43667800\_J21 Accession: AC203664

ESP Prediction: B Validation: D Mechanism: NAHR

Other Simple Repeat Low Complexity DNA LTR LINE SINE

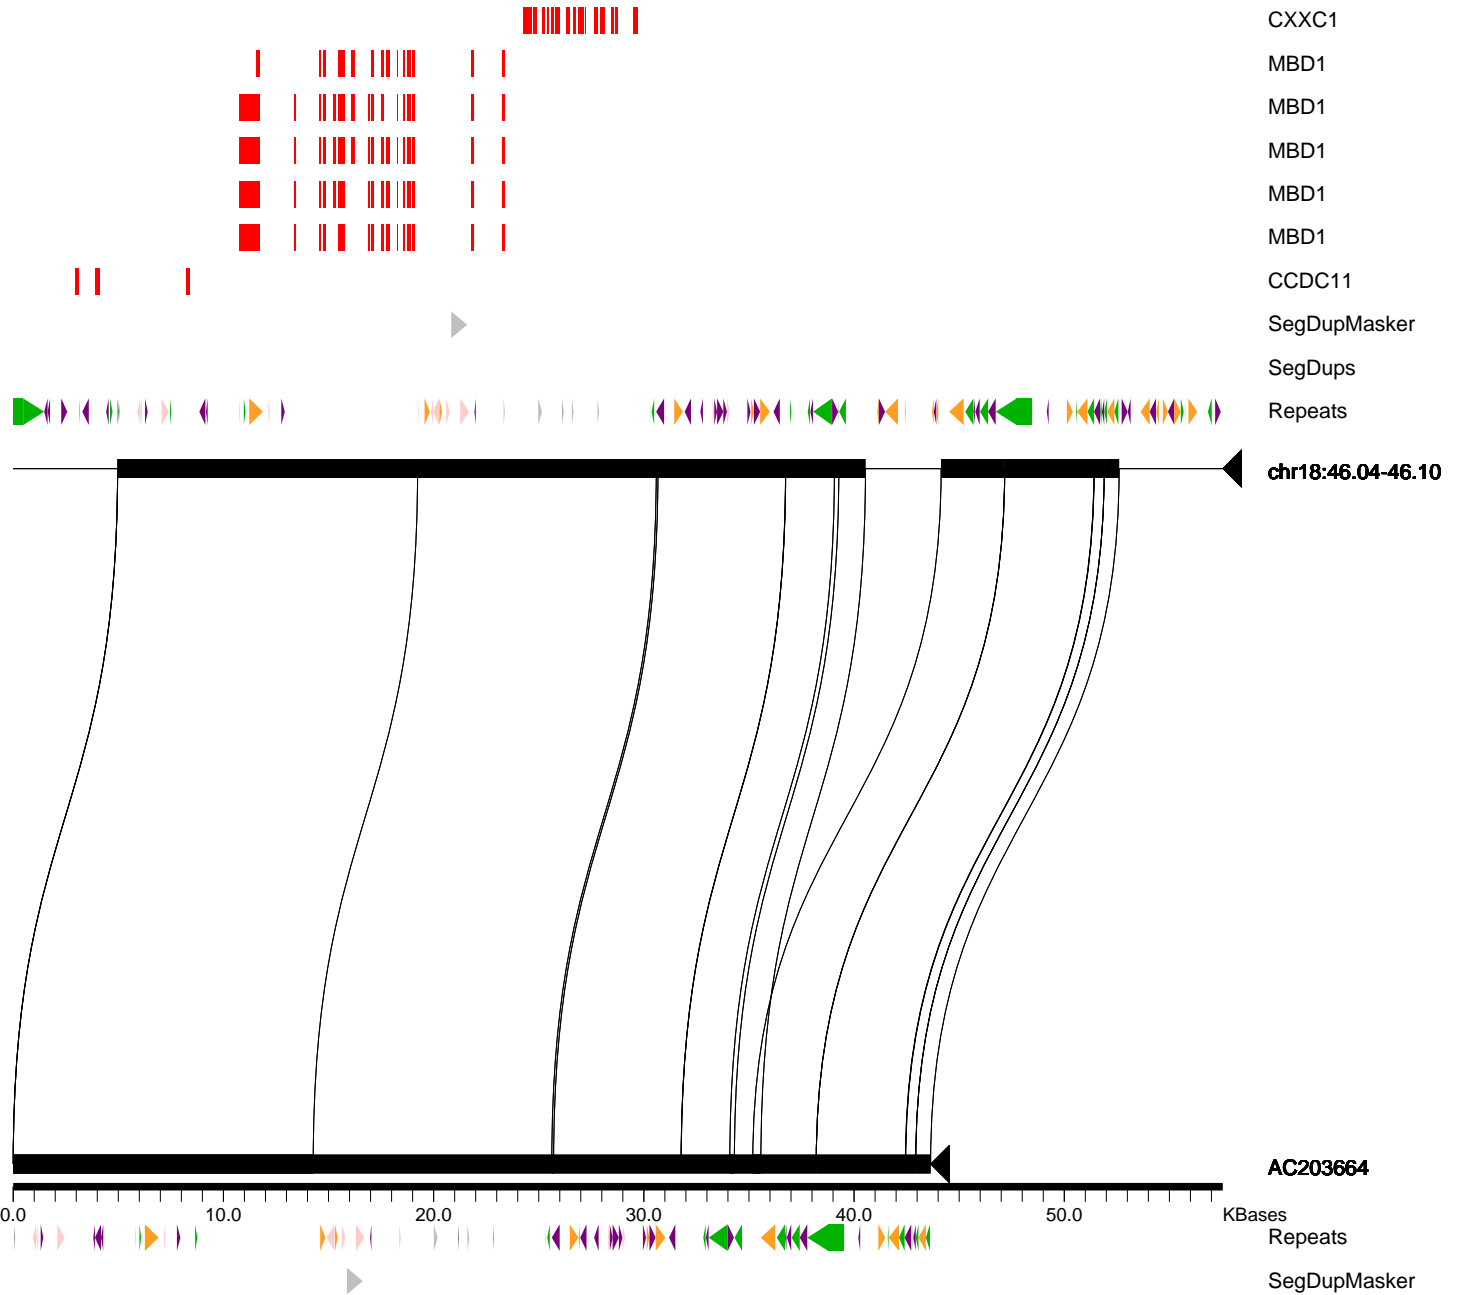

Clone: ABC10\_44471200\_F7 Accession: AC203663  
ESP Prediction: INV Validation: V Mechanism: NAHR

Other Simple Repeat Low Complexity DNA LTR LINE SINE

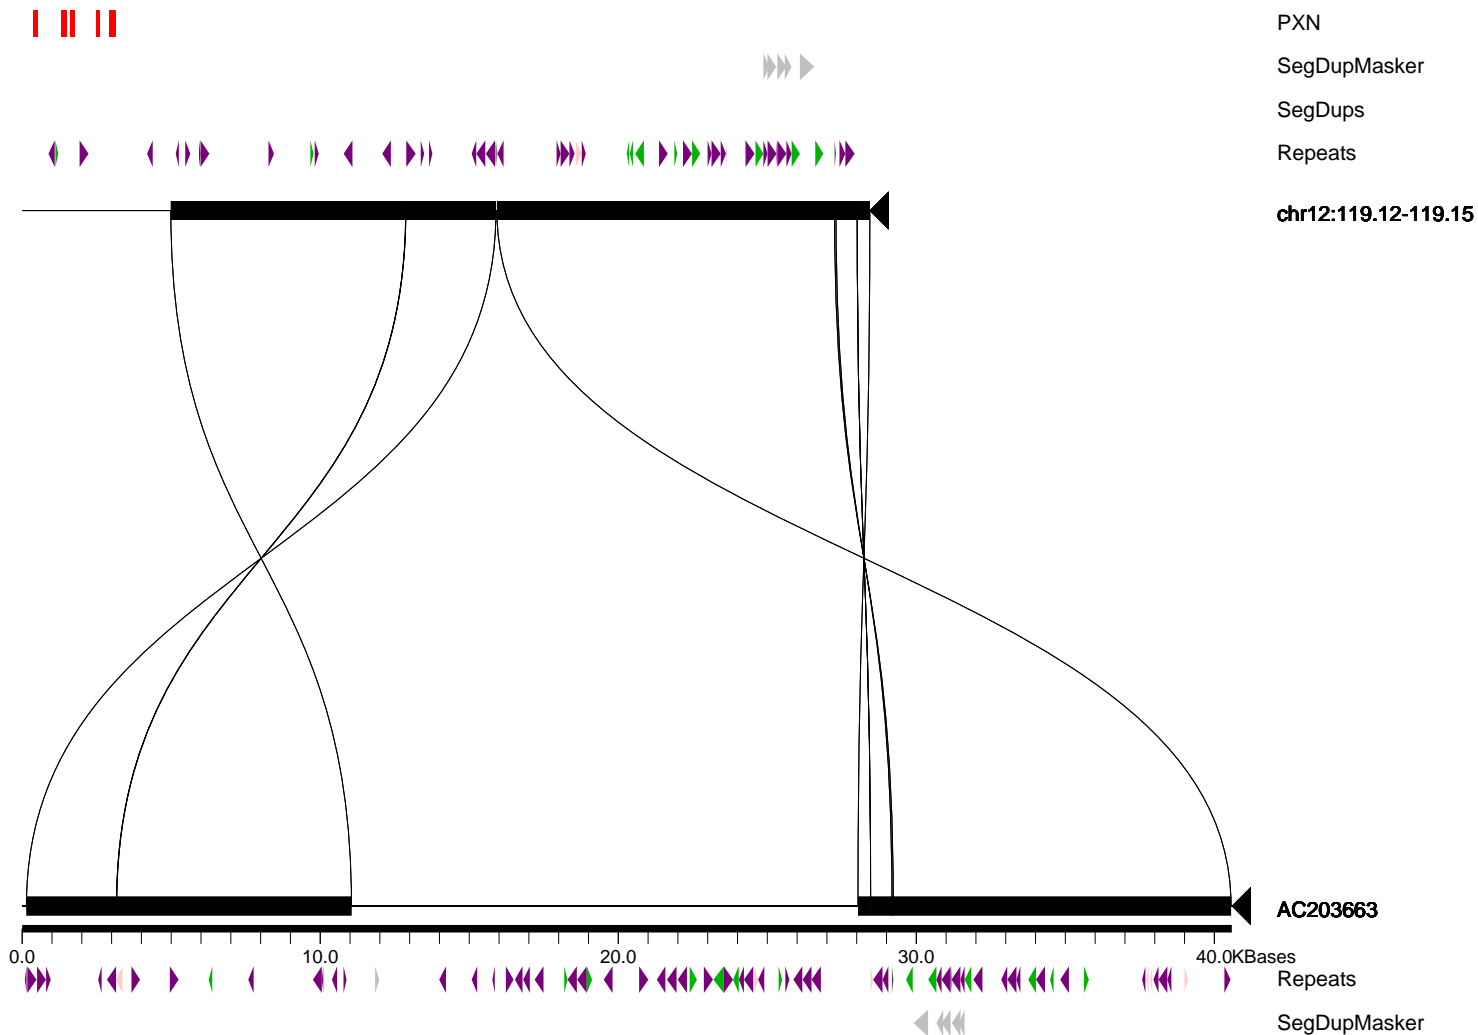

Clone: ABC10\_44477500\_F2 Accession: AC204966

ESP Prediction: S Validation: I Mechanism: NAHR

Other Simple Repeat Low Complexity DNA LTR LINE SINE

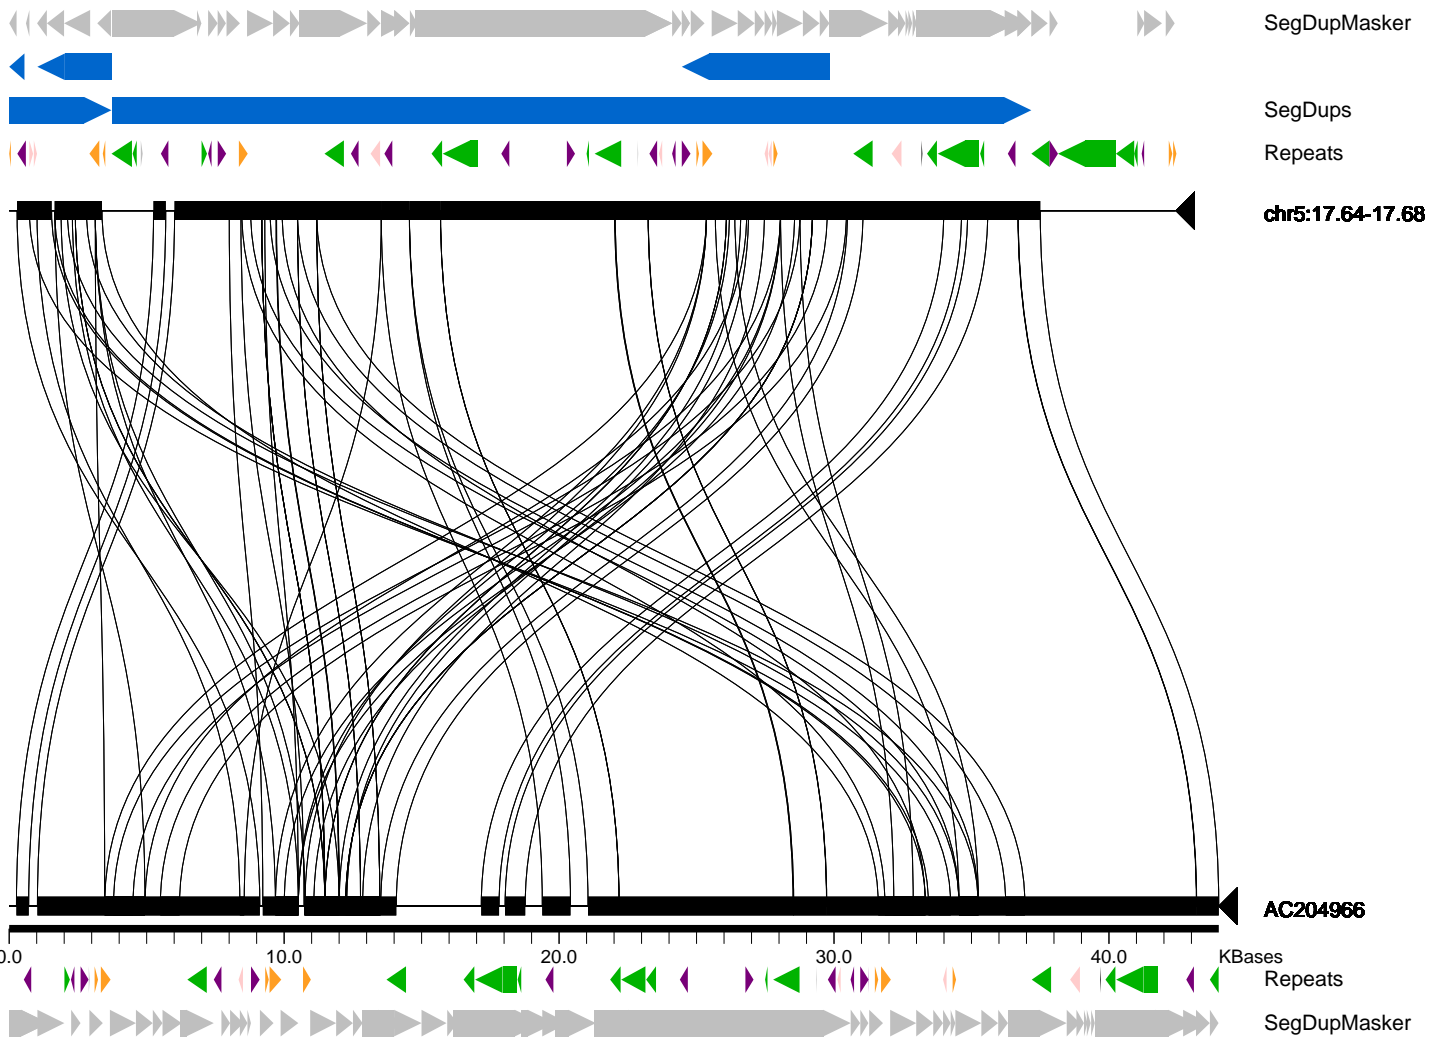

Clone: ABC10\_44501400\_N6 Accession: AC203655

ESP Prediction: B Validation: D Mechanism: NAHR?

Other Simple Repeat Low Complexity DNA LTR LINE SINE

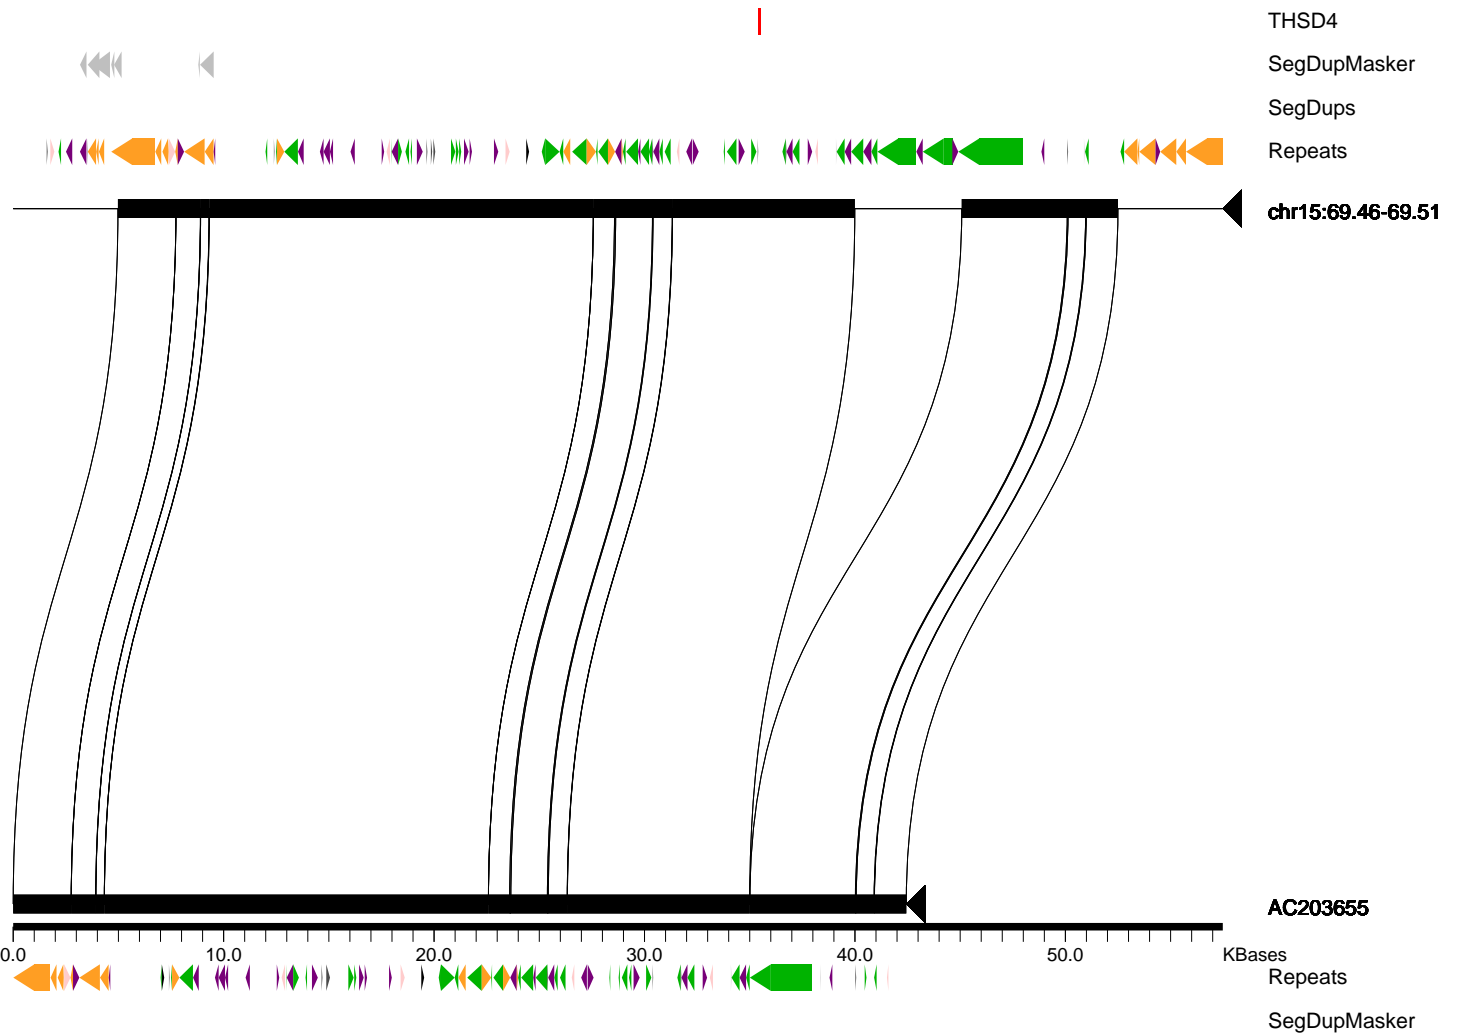

Clone: ABC10\_44520200\_K2 Accession: AC203608

ESP Prediction: B Validation: D Mechanism: NAHR

Other Simple Repeat Low Complexity DNA LTR LINE SINE

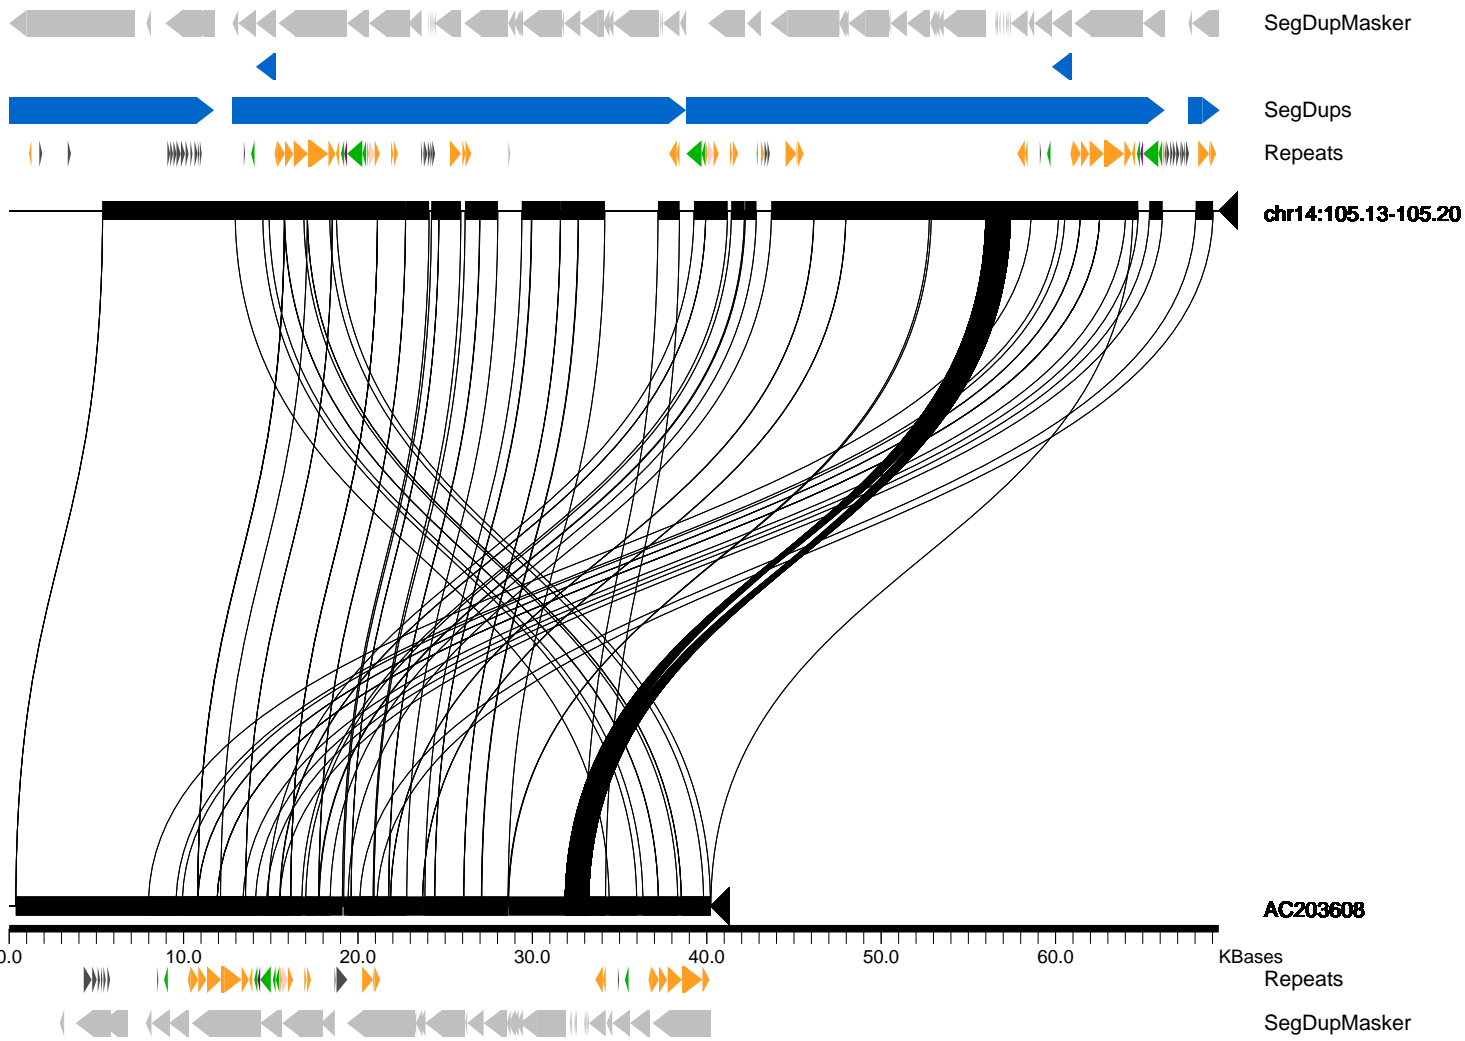

Clone: ABC10\_45548500\_P12 Accession: AC203658

ESP Prediction: B Validation: D Mechanism: NAHR

Other Simple Repeat Low Complexity DNA LTR LINE SINE

SegDupMasker

SegDups

Repeats

chr11:65.65-65.71

AC203658

KBases

Repeats

SegDupMasker

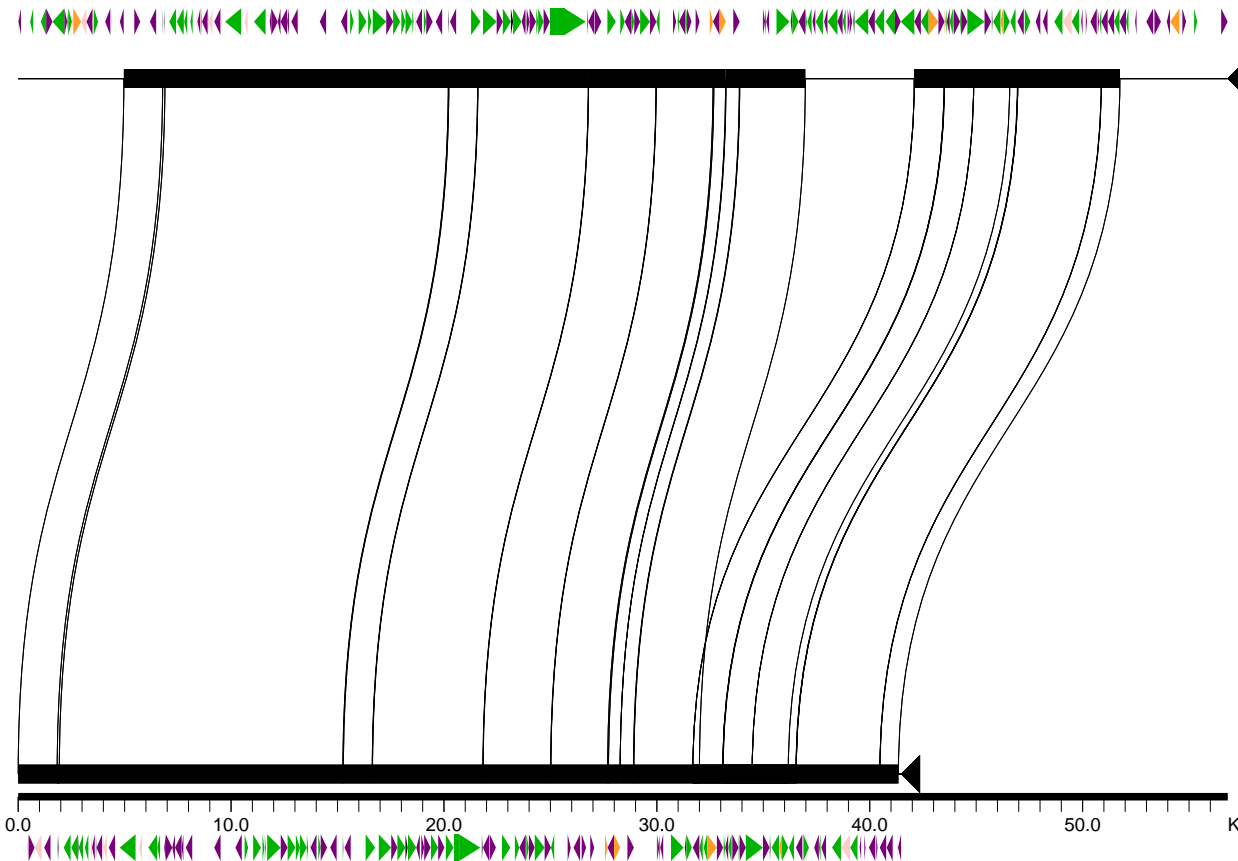



Clone: ABC10\_45549100\_G19 Accession: AC203654

ESP Prediction: S Validation: I Mechanism: NAHR

Other Simple Repeat Low Complexity DNA LTR LINE SINE

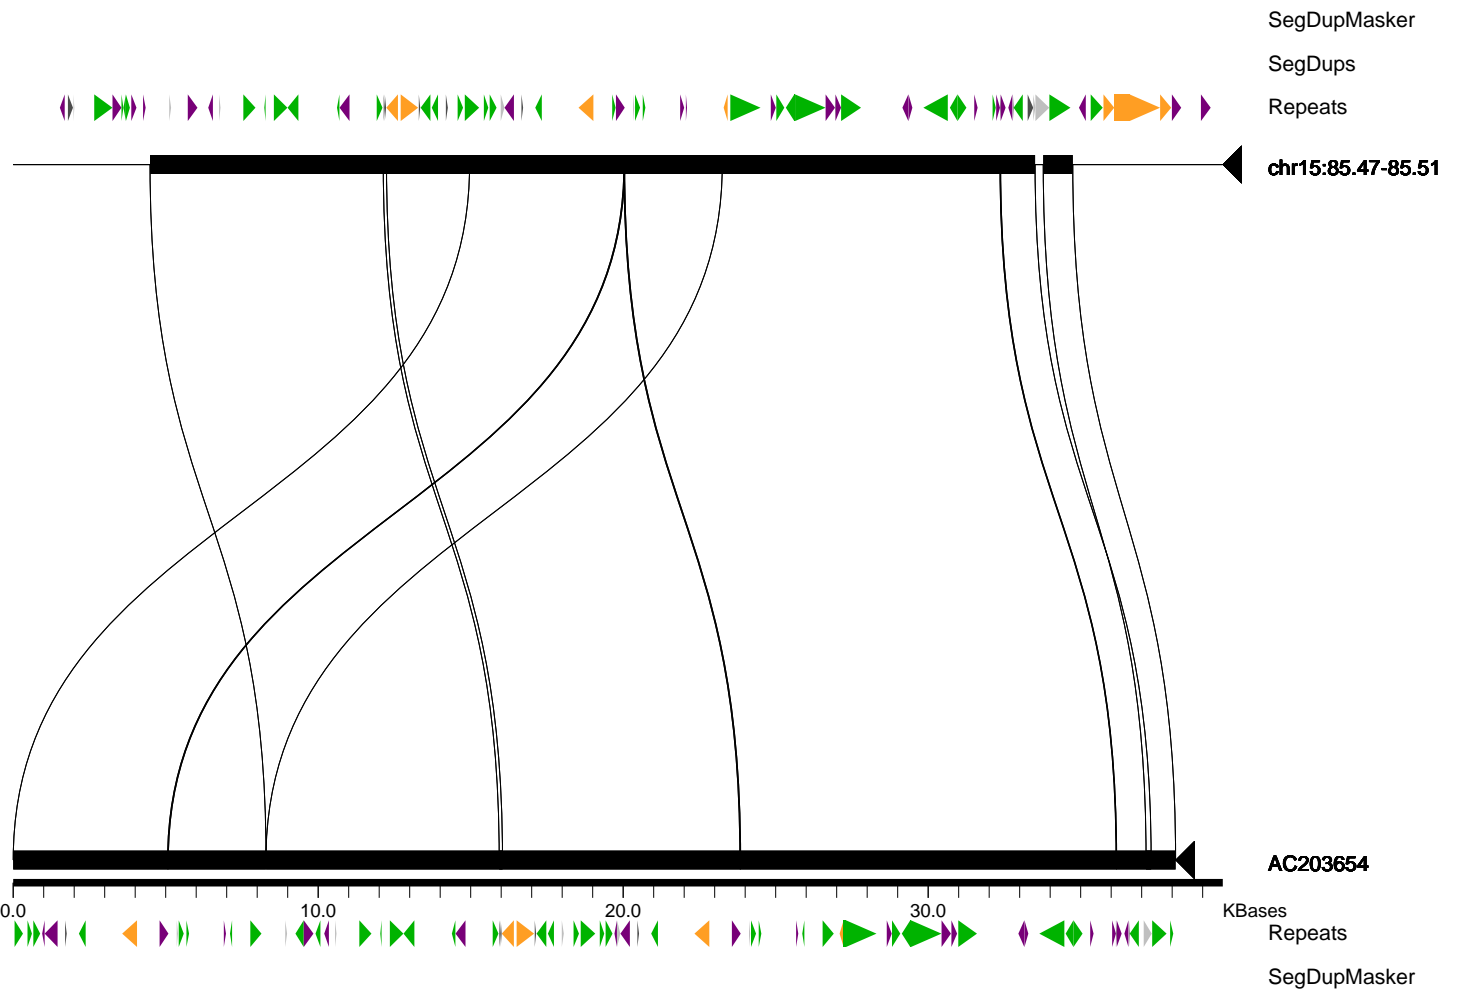

Clone: ABC10\_44421100\_E16 Accession: AC203586

ESP Prediction: B Validation: D Mechanism: NAHR

Other Simple Repeat Low Complexity DNA LTR LINE SINE

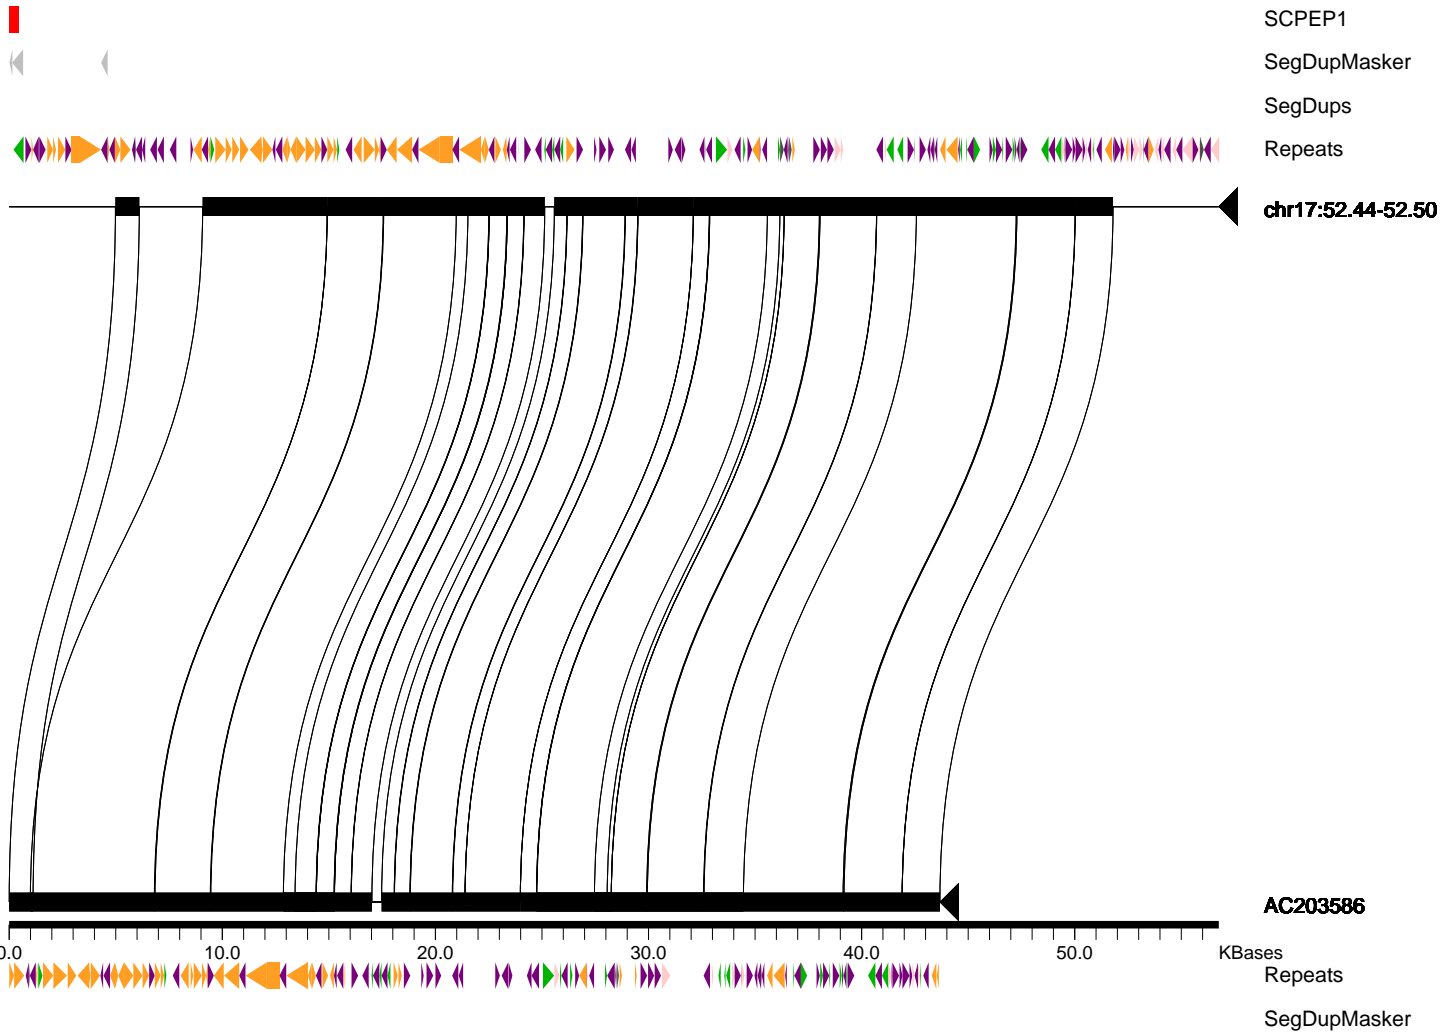

Clone: ABC10\_44551900\_J2 Accession: AC203621

ESP Prediction: S Validation: I Mechanism: NAHR

Other Simple Repeat Low Complexity DNA LTR LINE SINE

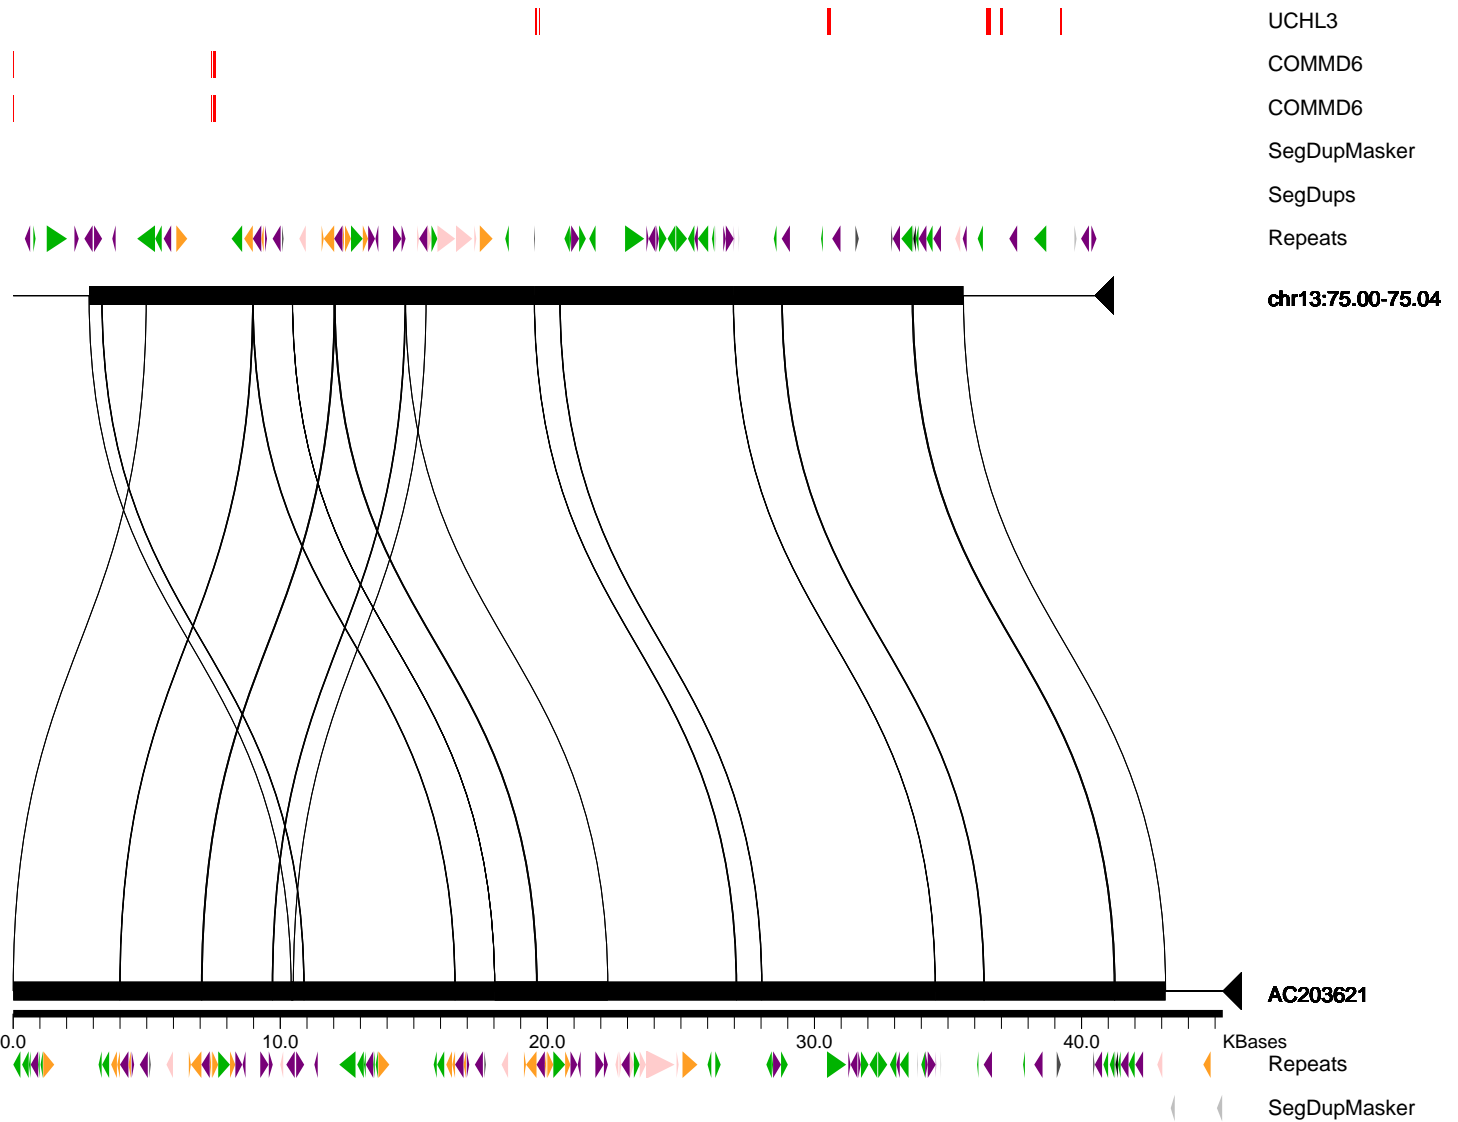

Clone: ABC10\_1608170\_C18 Accession: AC213752

ESP Prediction: B Validation: D Mechanism: NAHR

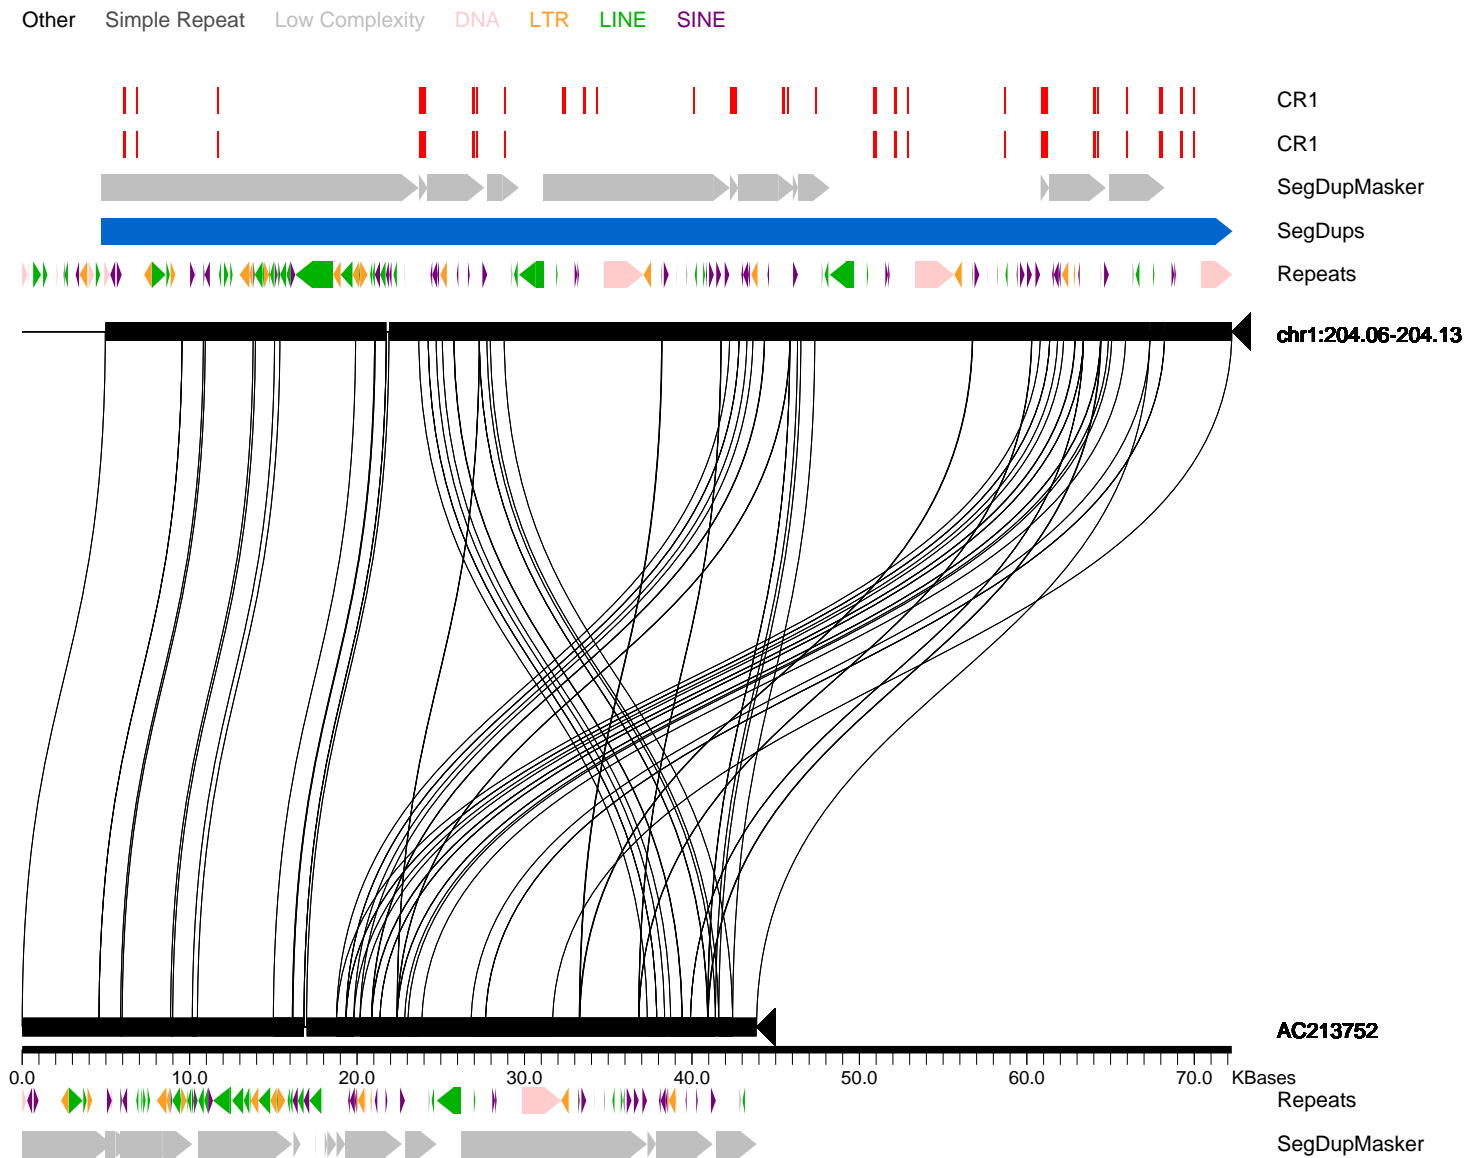

Clone: ABC7\_477422\_D14 Accession: AC213229

ESP Prediction: B Validation: DI Mechanism: NAHR

Other Simple Repeat Low Complexity DNA LTR LINE SINE

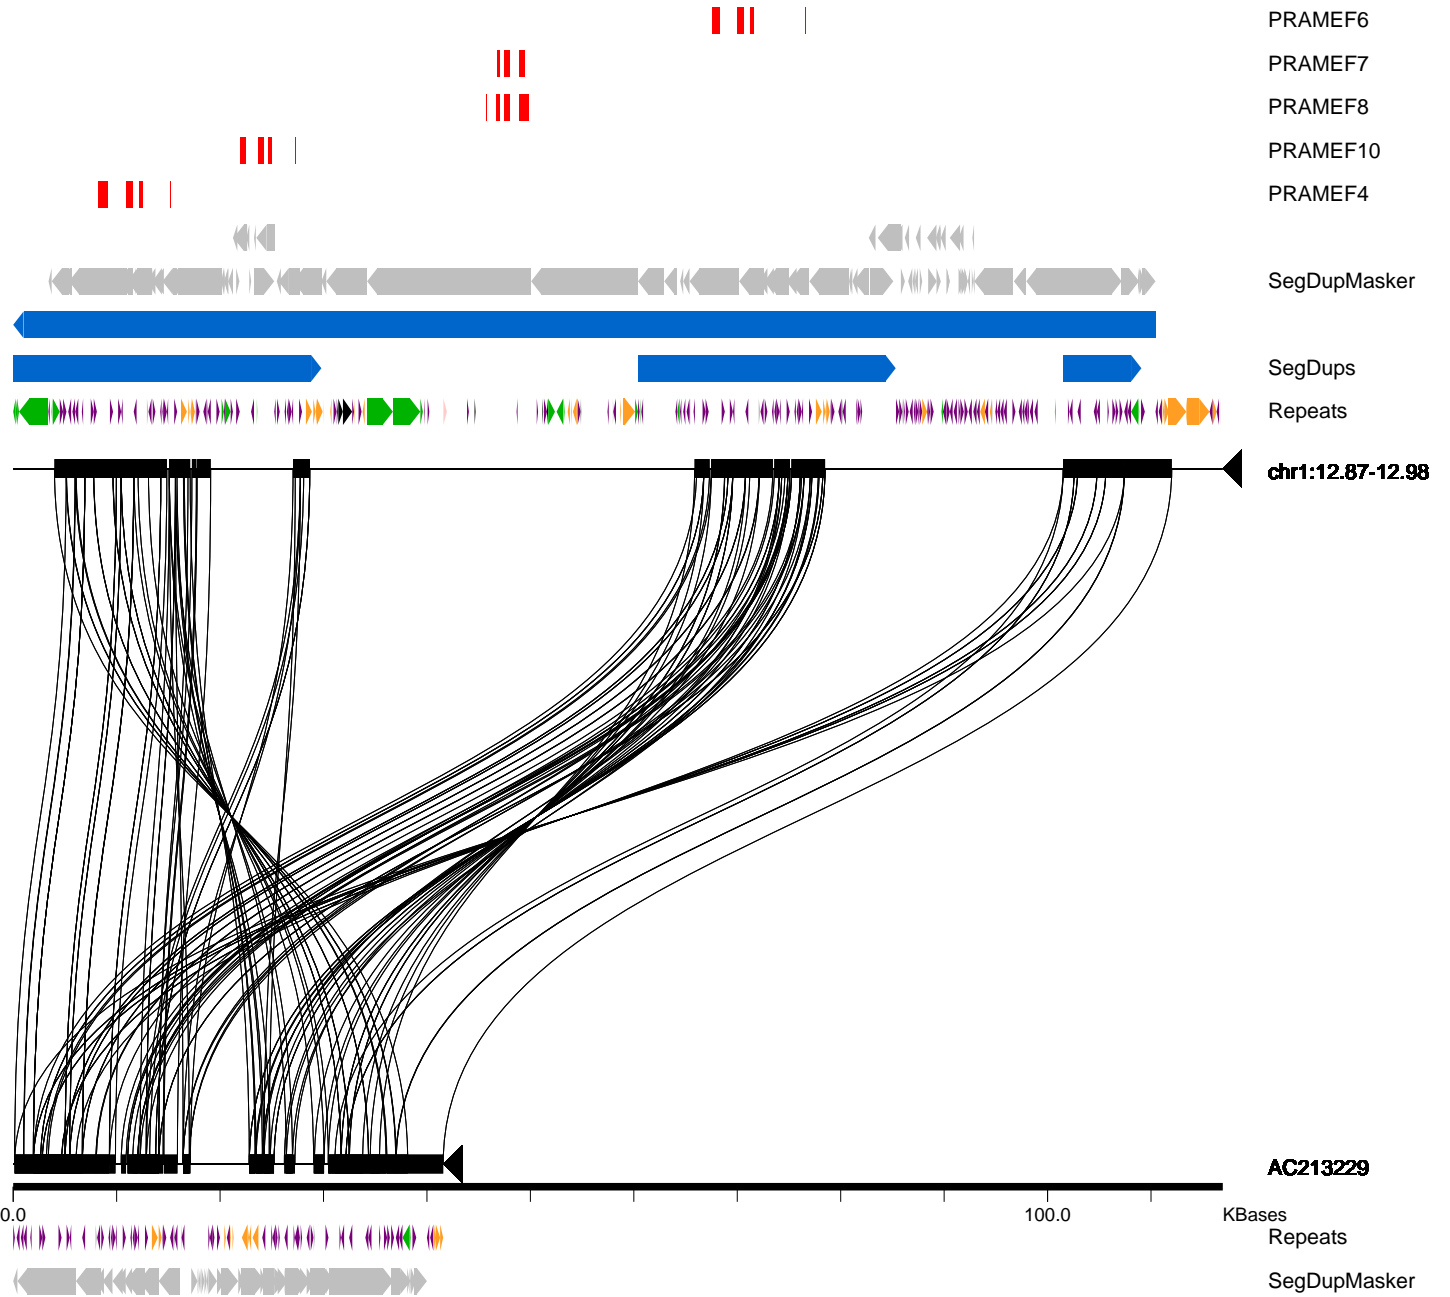

Clone: ABC7\_618422\_P21 Accession: AC213283

ESP Prediction: INV Validation: V Mechanism: NAHR?

Other Simple Repeat Low Complexity DNA LTR LINE SINE

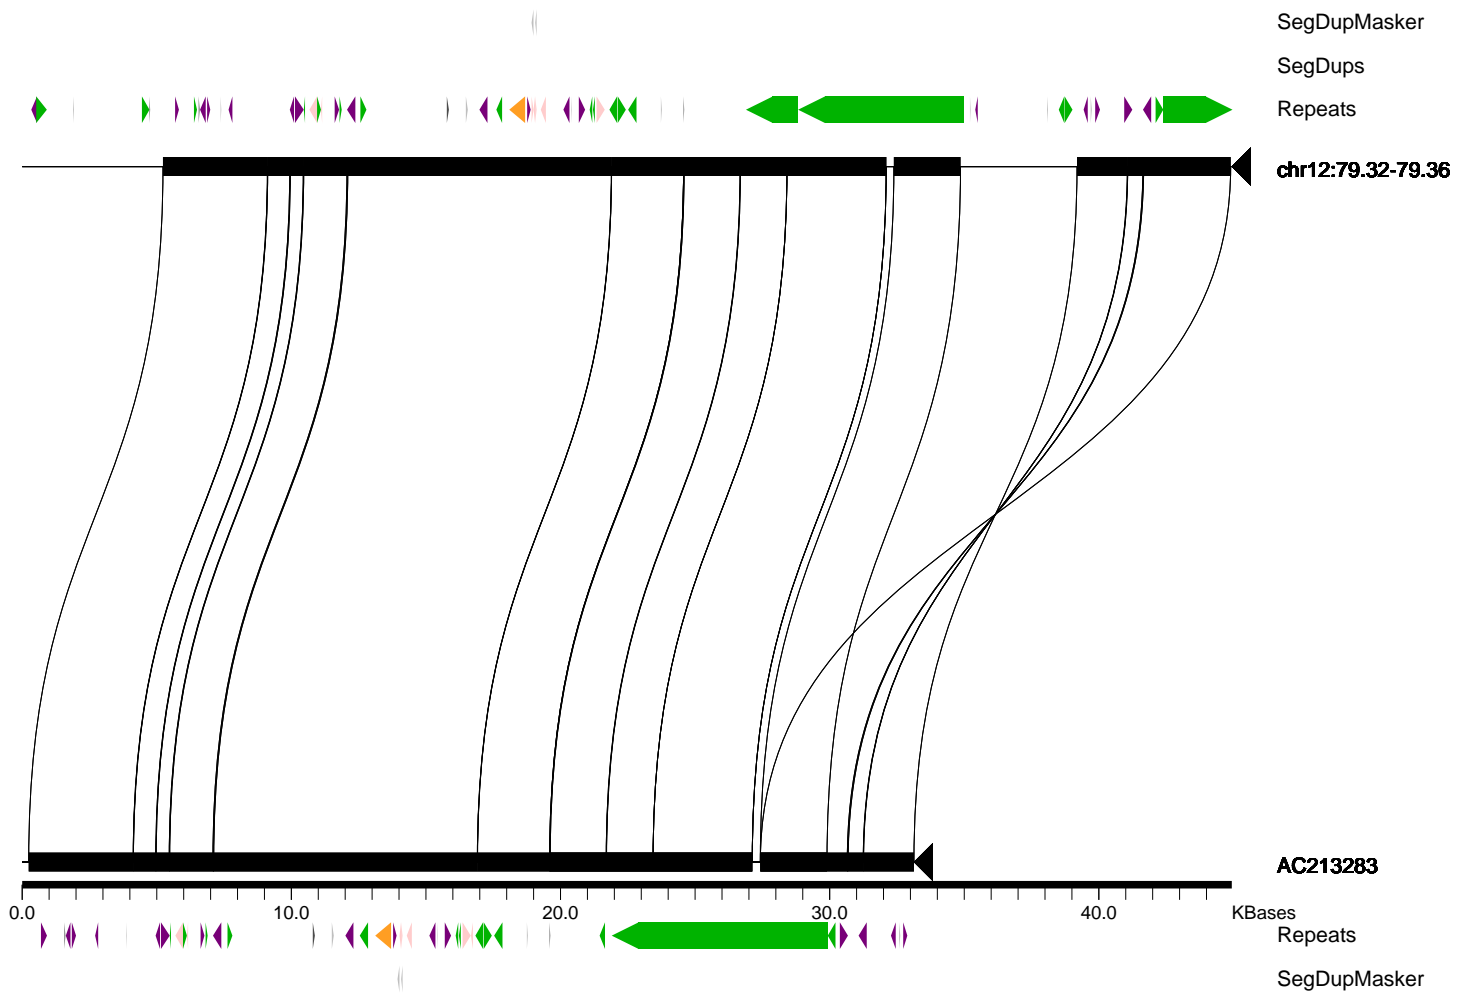

Clone: ABC7\_40267300\_O7 Accession: AC213290  
ESP Prediction: B Validation: D Mechanism: NAHR

Other Simple Repeat Low Complexity DNA LTR LINE SINE

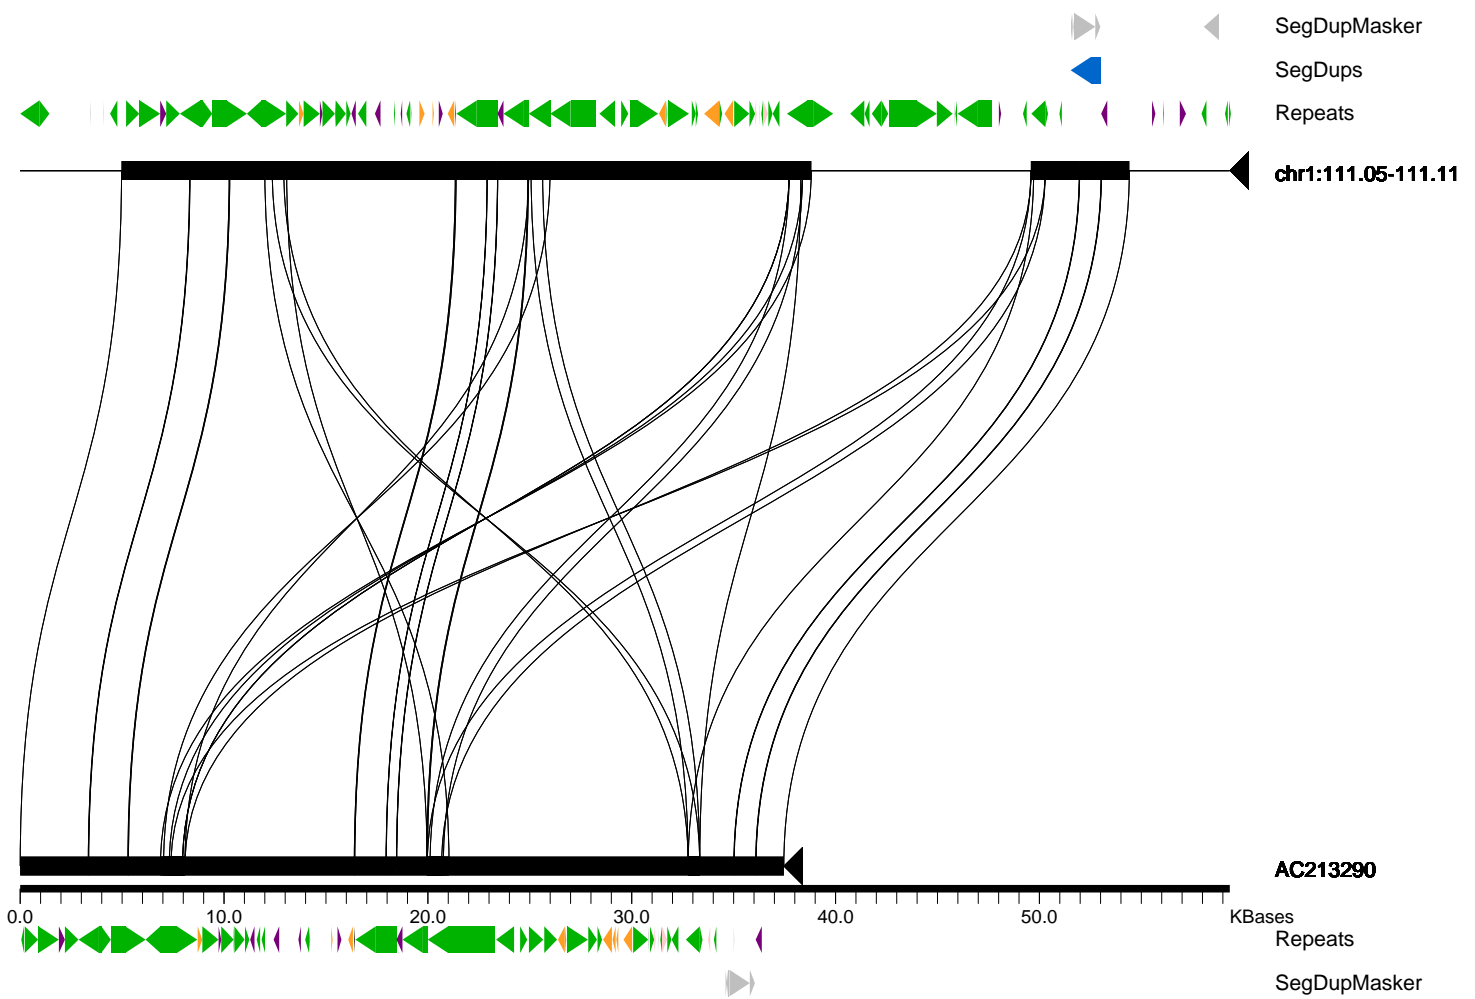

Clone: ABC7\_40268200\_K13 Accession: AC213225  
ESP Prediction: INV Validation: V Mechanism: NAHR

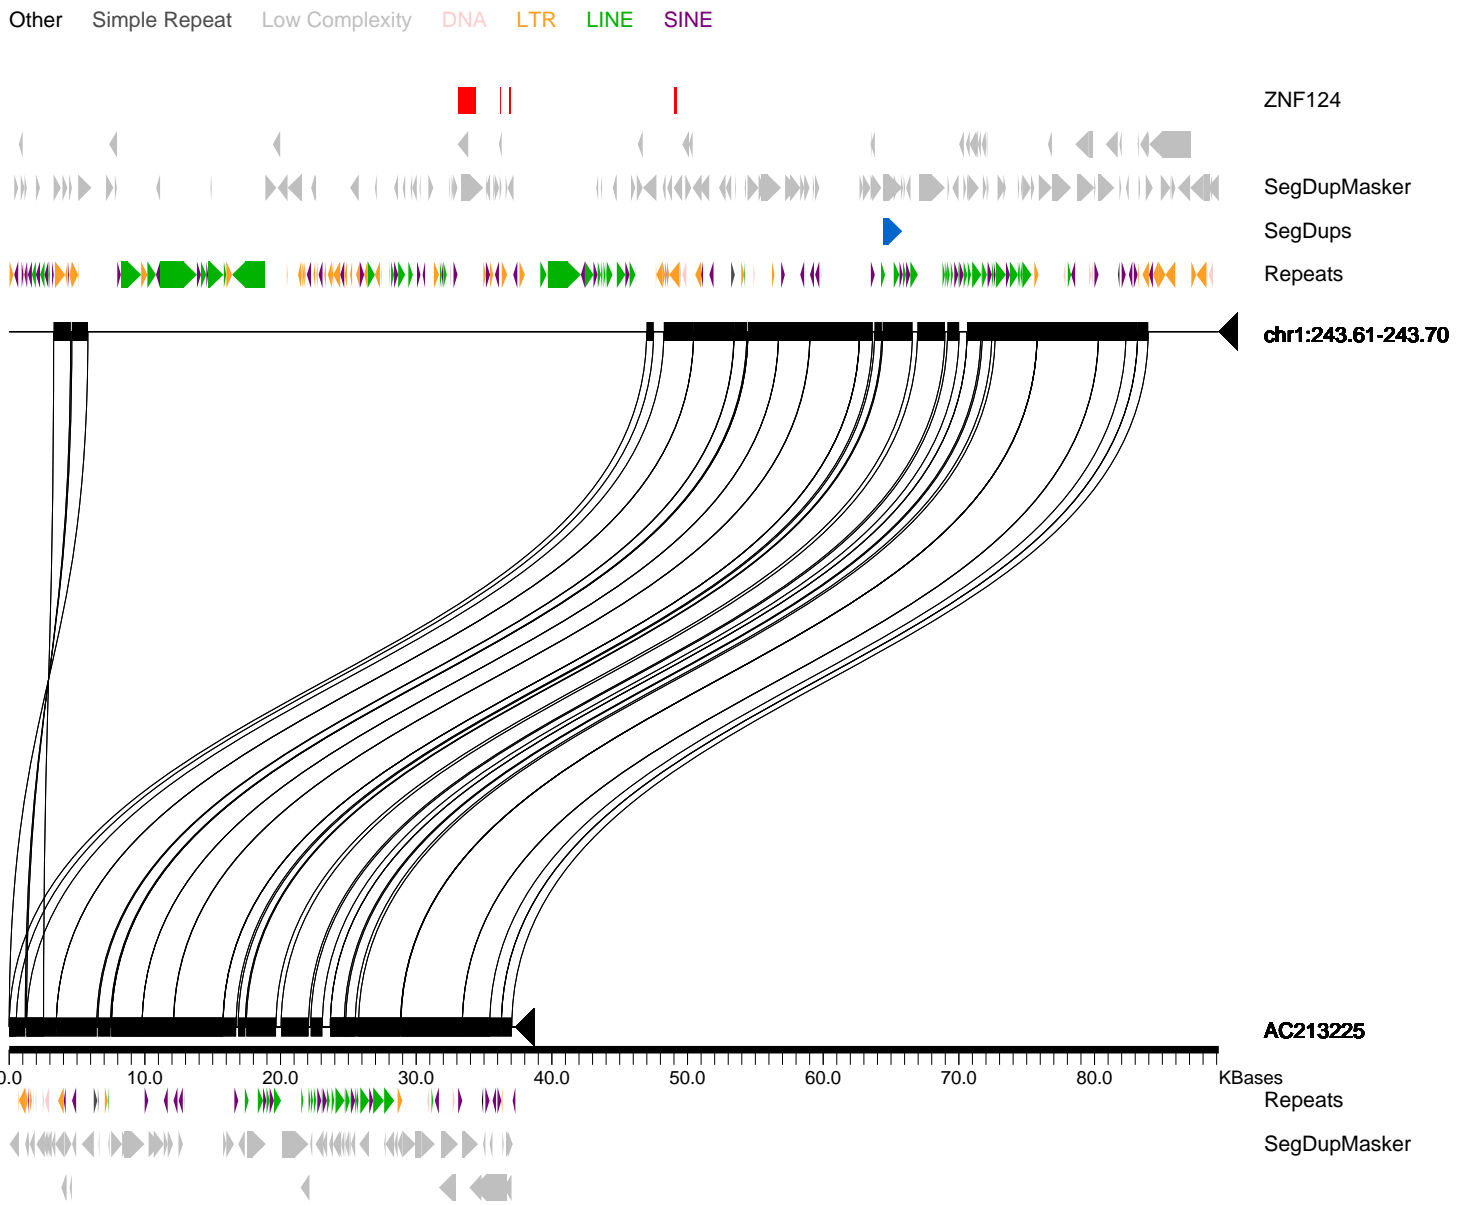



Clone: ABC7\_40270900\_A10 Accession: AC213279

ESP Prediction: S Validation: I Mechanism: NAHR

Other Simple Repeat Low Complexity DNA LTR LINE SINE

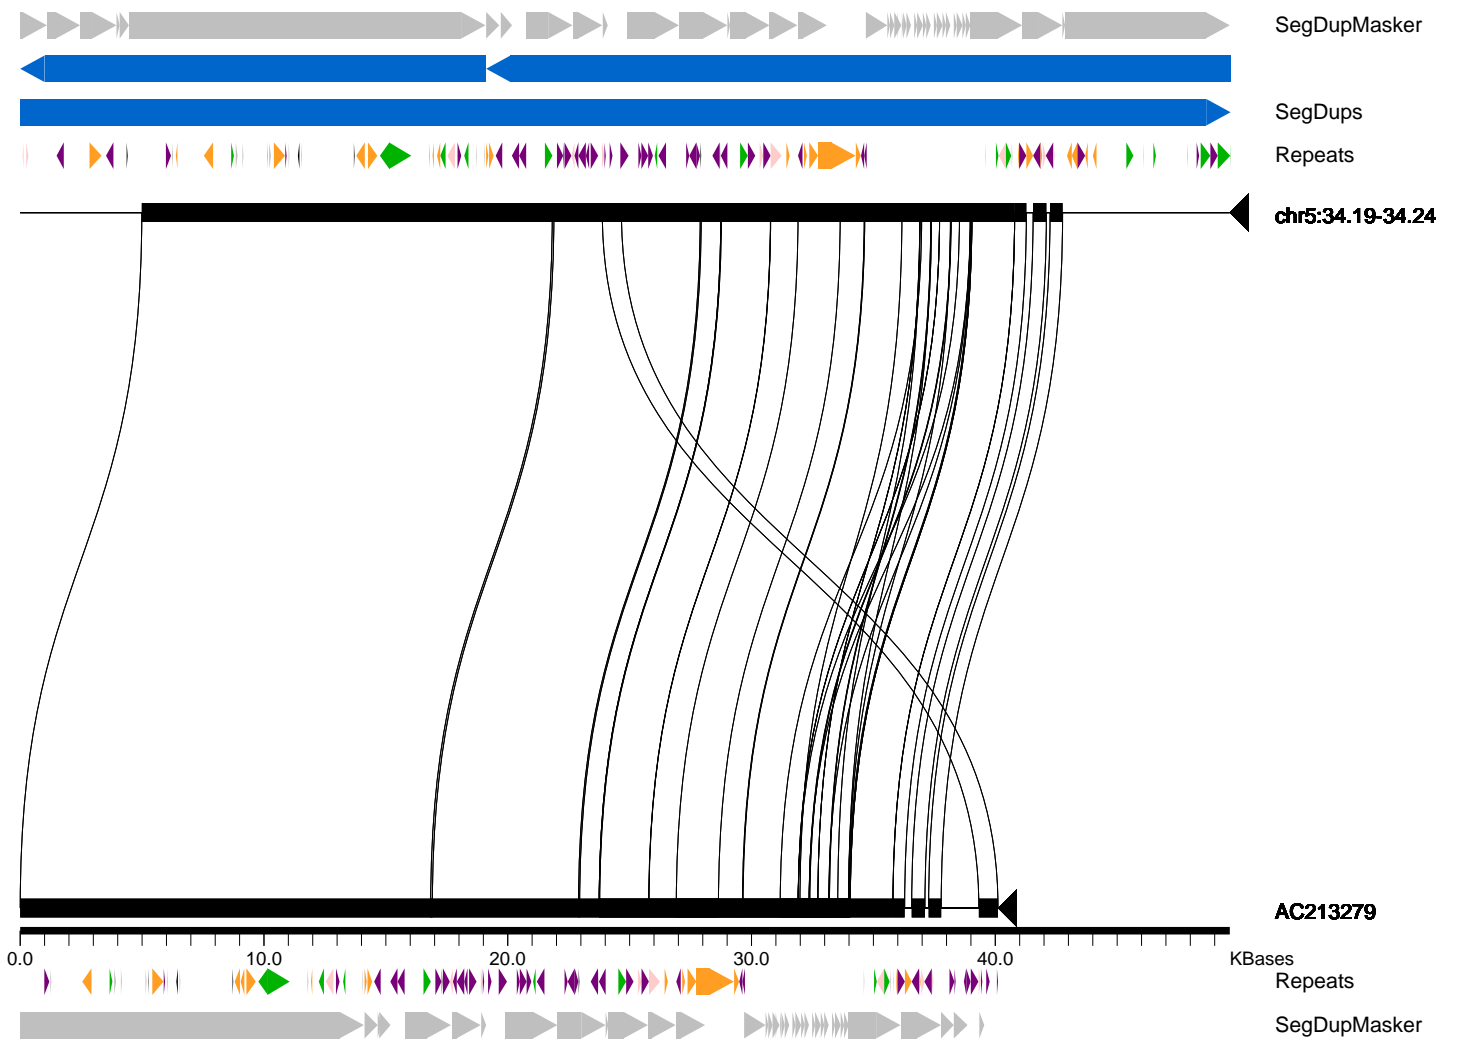

Clone: ABC7\_40272600\_M2 Accession: AC213288  
ESP Prediction: INV Validation: V Mechanism: NAHR

Other Simple Repeat Low Complexity DNA LTR LINE SINE

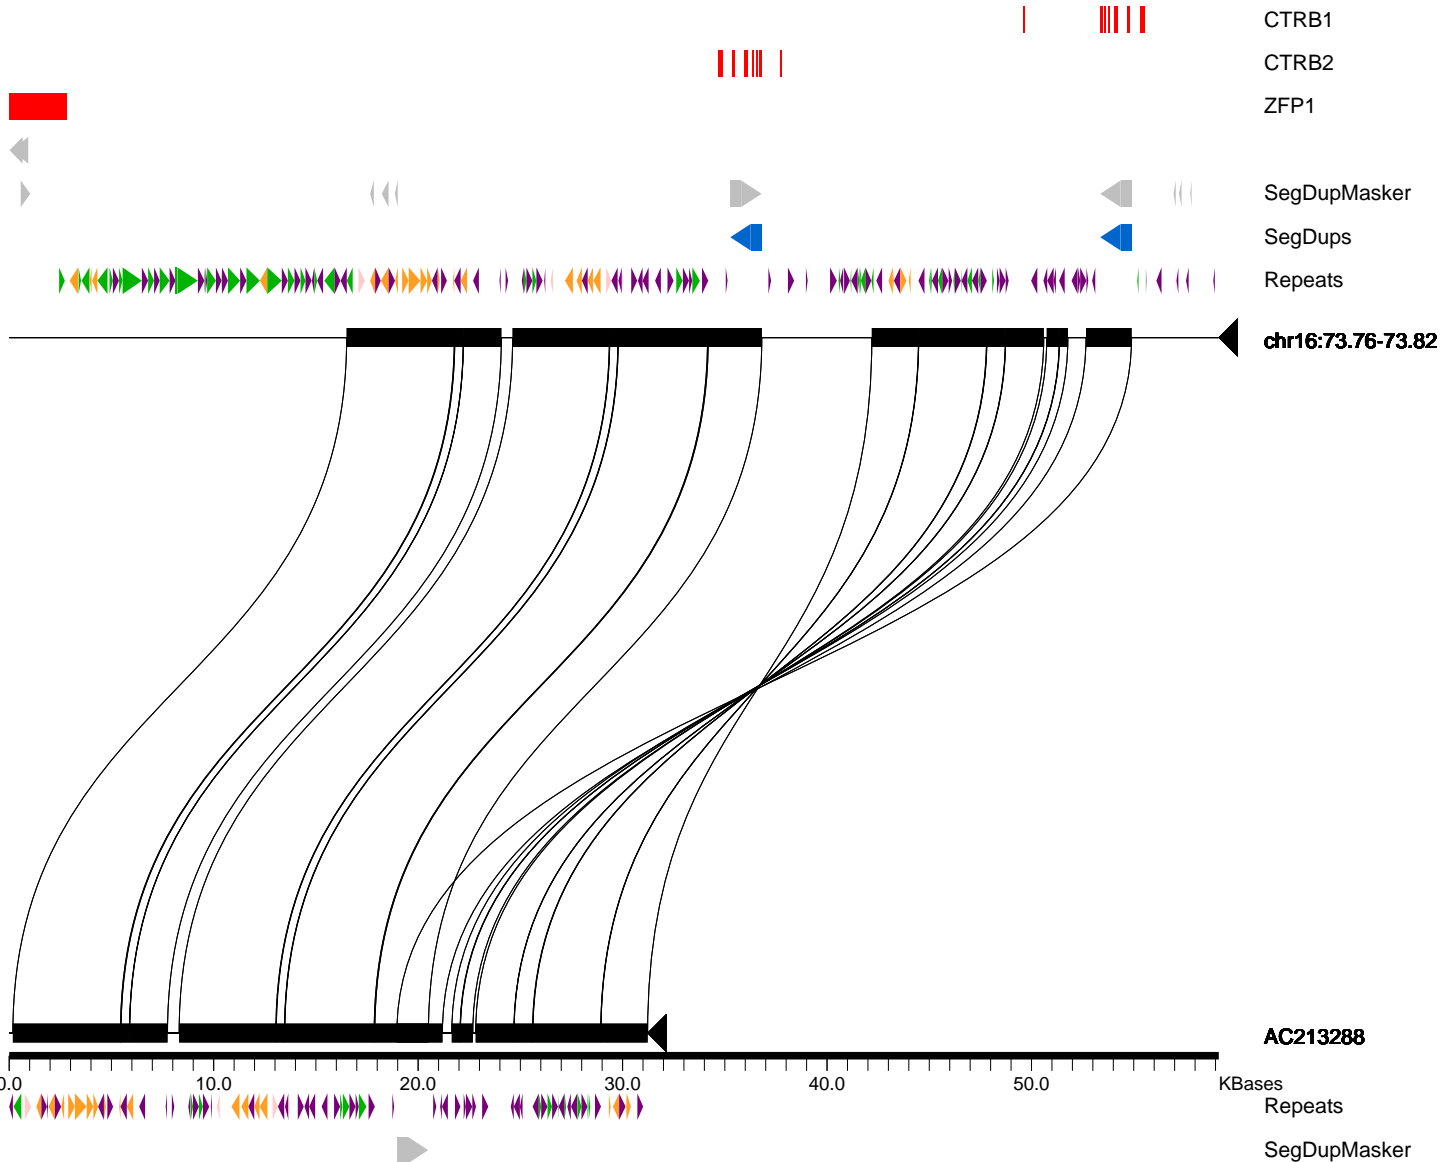

Clone: ABC7\_40618700\_N12 Accession: AC213282

ESP Prediction: B Validation: D Mechanism: NAHR

Other Simple Repeat Low Complexity DNA LTR LINE SINE

SegDupMasker

SegDups

Repeats

chr10:100.64-100.70

AC213282

Repeats

SegDupMasker

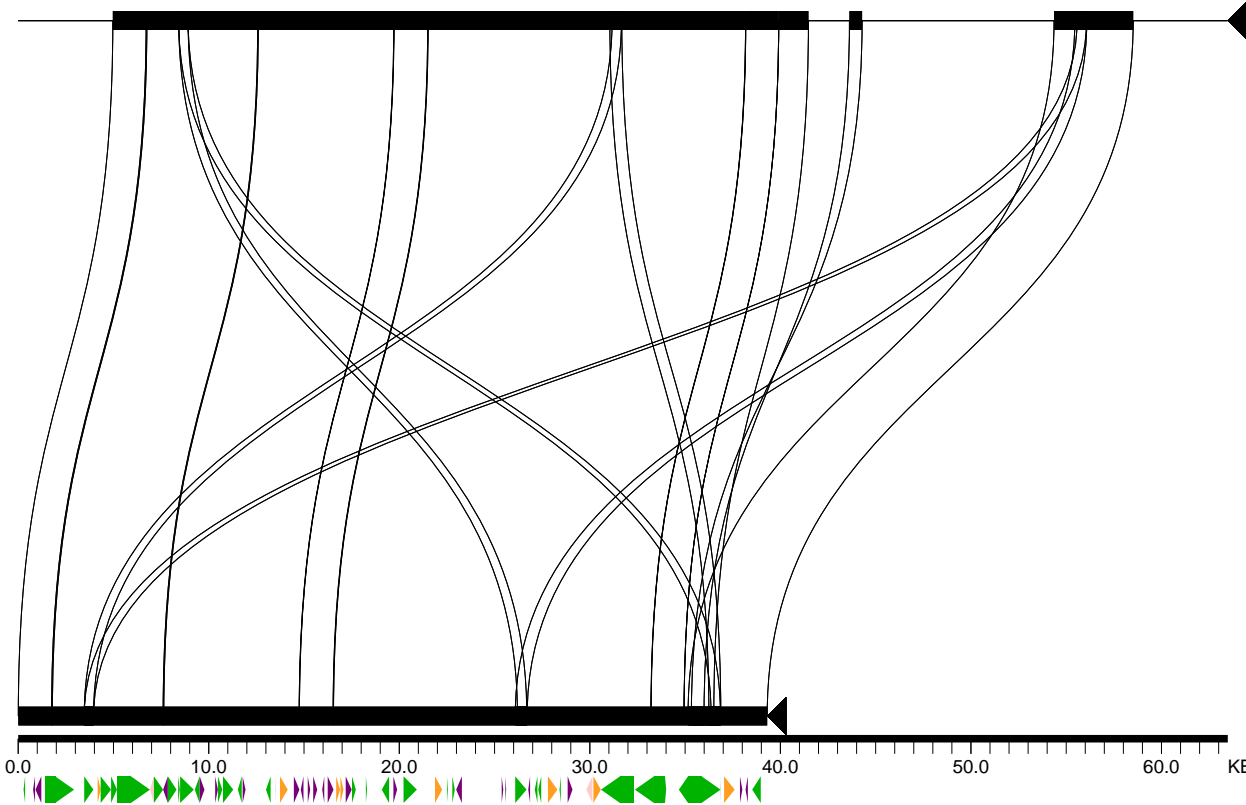

Clone: ABC7\_41851700\_H4 Accession: AC213215  
ESP Prediction: B Validation: D Mechanism: NAHR

Other Simple Repeat Low Complexity DNA LTR LINE SINE

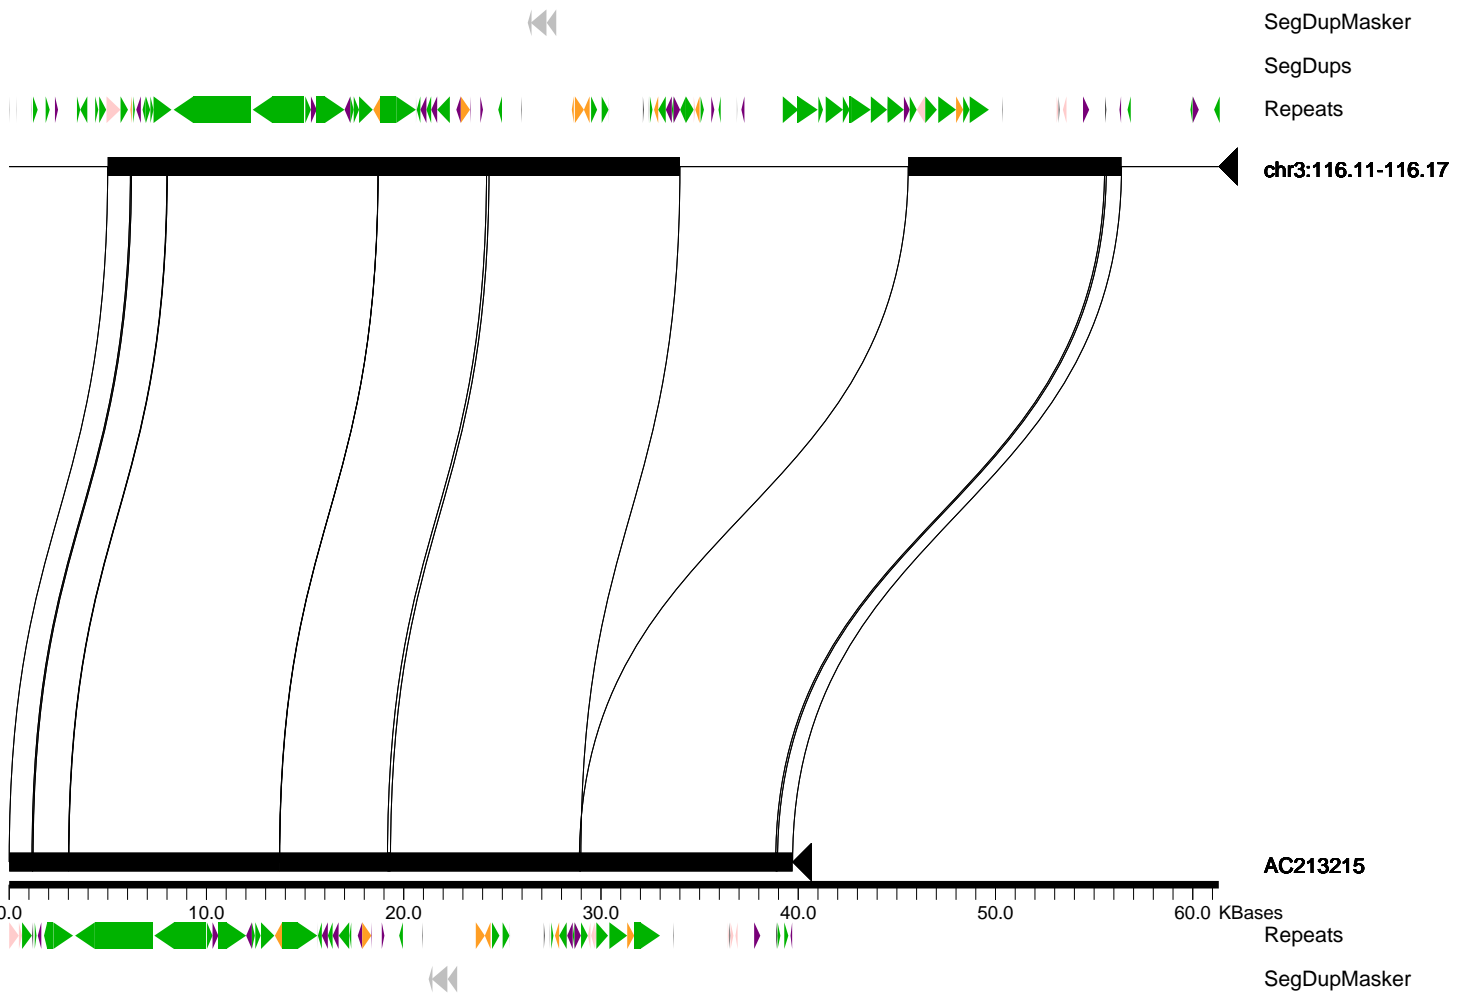

Clone: ABC7\_42392600\_P21 Accession: AC213278

ESP Prediction: INV Validation: V Mechanism: NAHR?

Other Simple Repeat Low Complexity DNA LTR LINE SINE

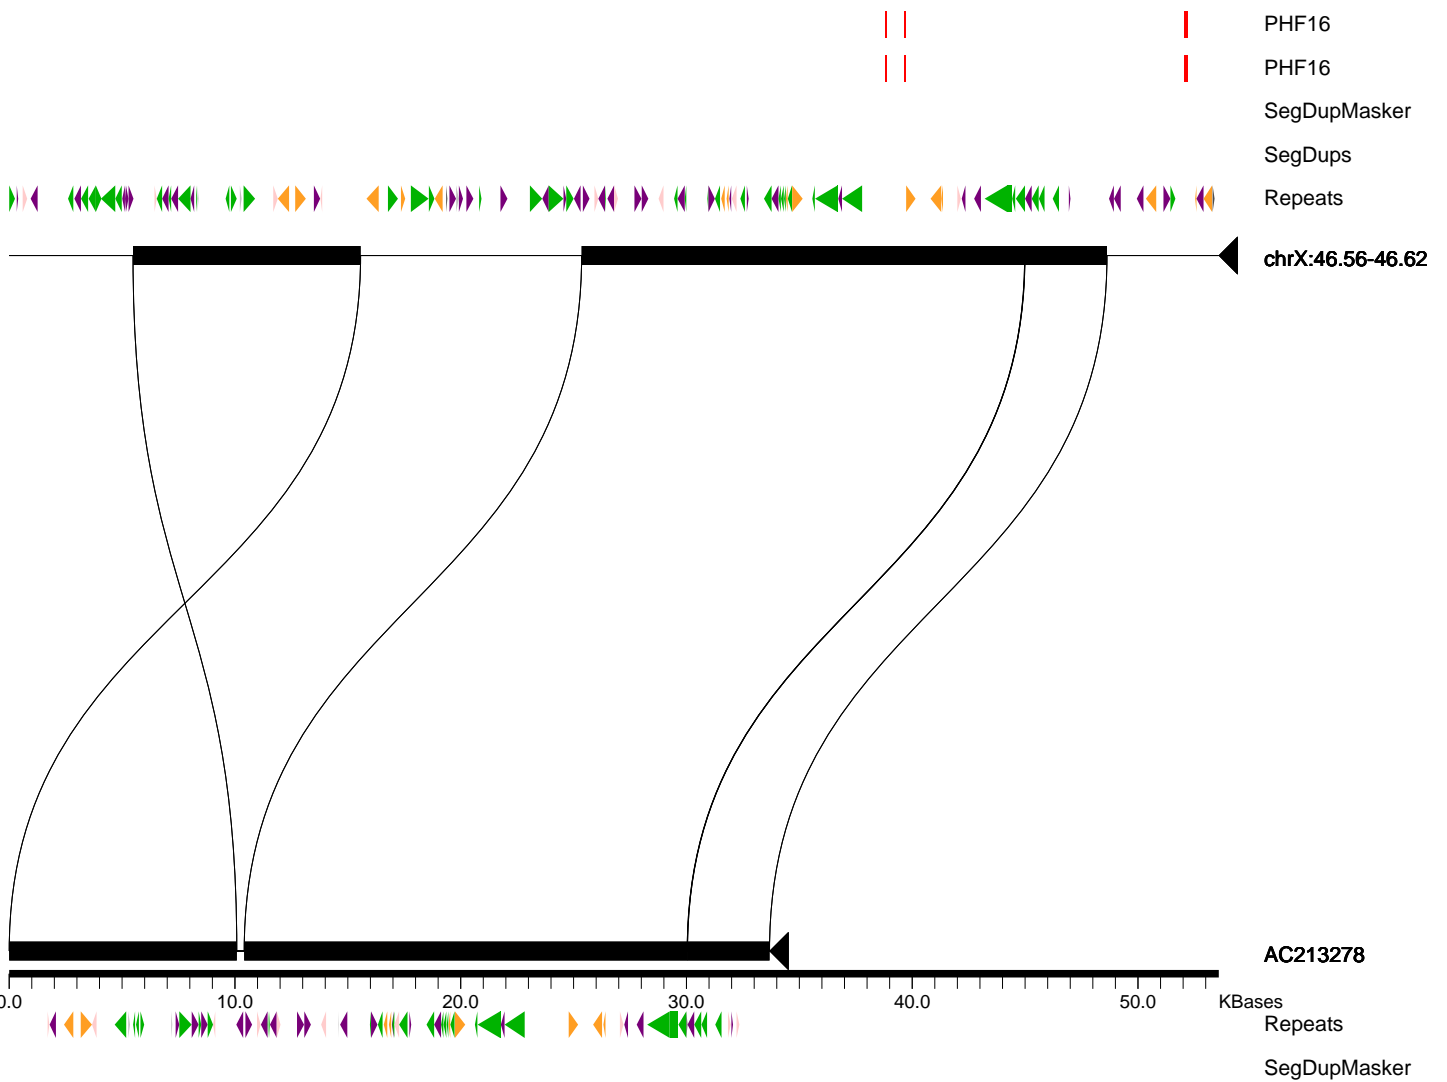

Clone: ABC7\_42402600\_J17 Accession: AC213220

ESP Prediction: B Validation: D Mechanism: NAHR

Other Simple Repeat Low Complexity DNA LTR LINE SINE

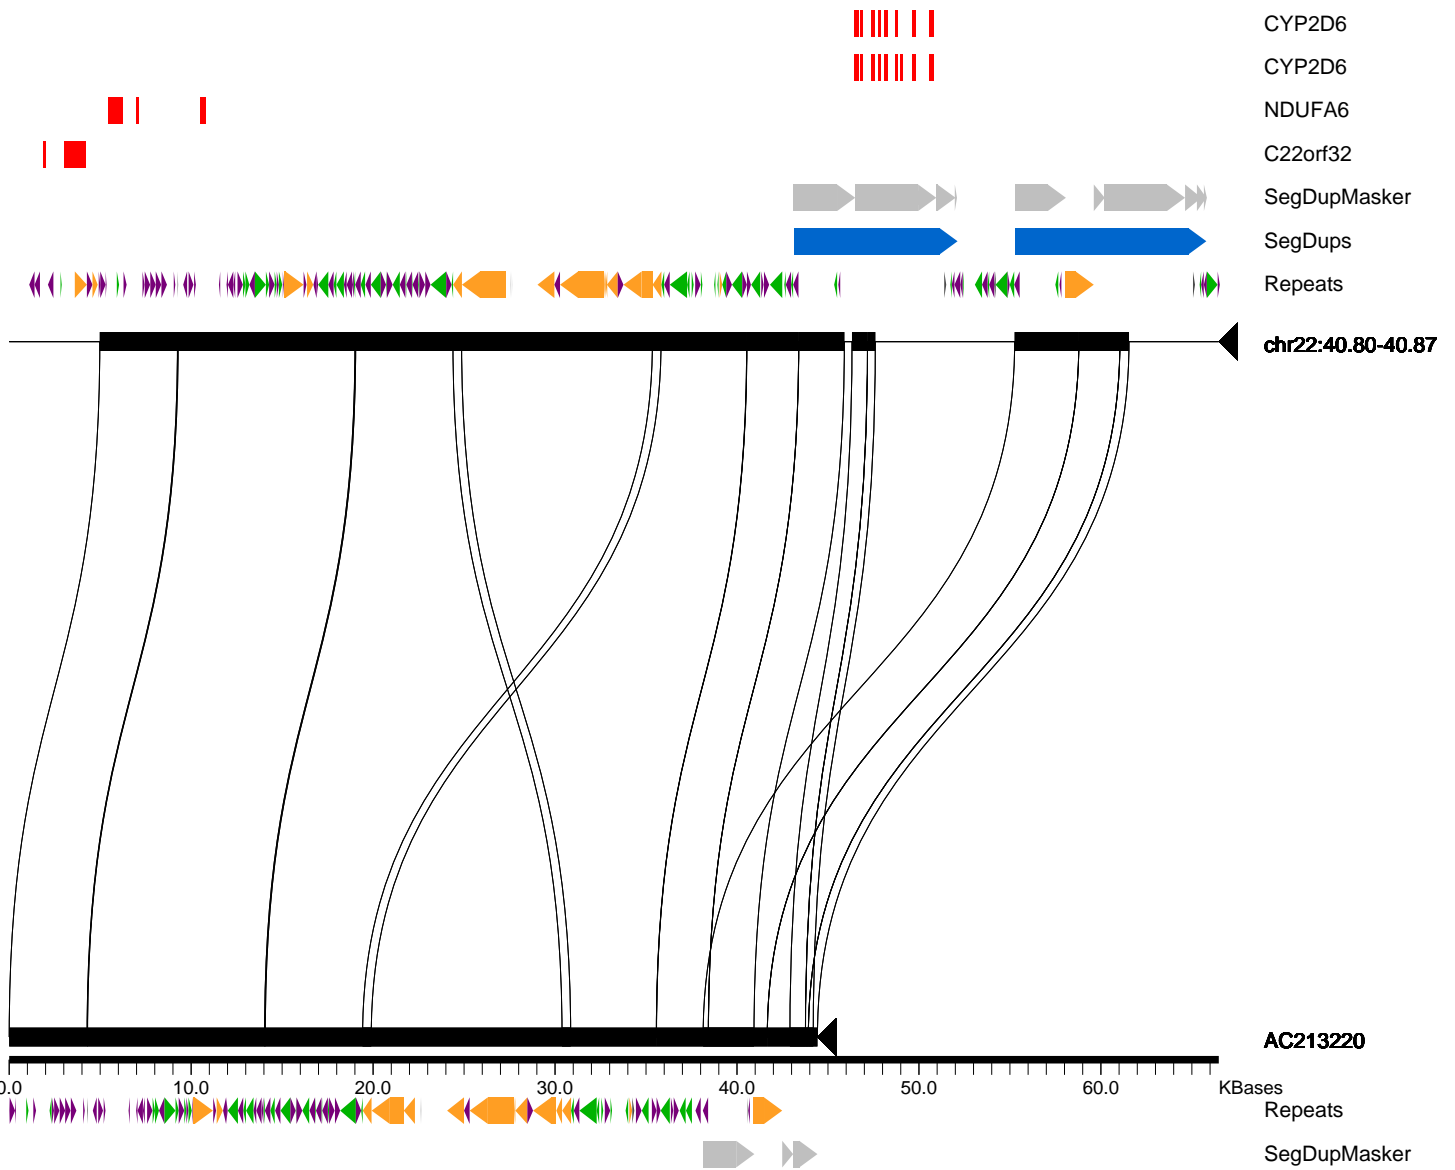

Clone: ABC7\_42456600\_M5 Accession: AC213219  
ESP Prediction: B Validation: D Mechanism: NAHR

Other Simple Repeat Low Complexity DNA LTR LINE SINE

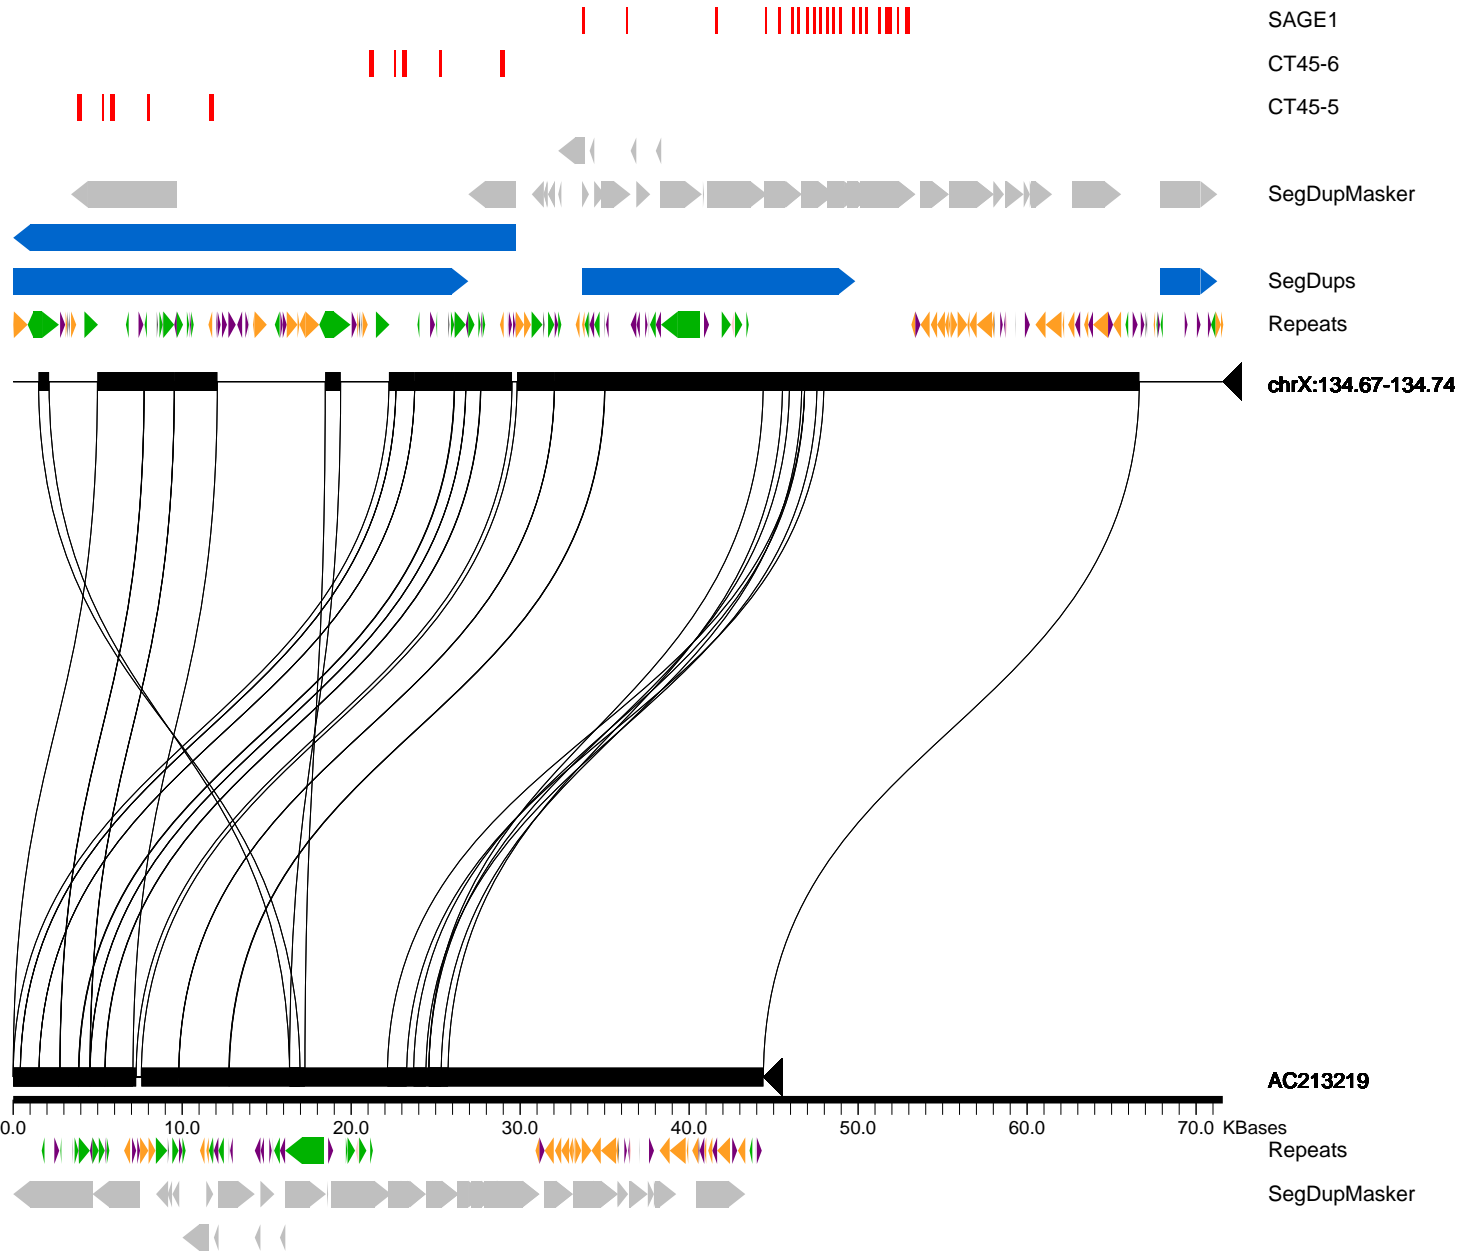

Clone: ABC7\_42486800\_K15 Accession: AC213227

ESP Prediction: S Validation: I Mechanism: NAHR

Other Simple Repeat Low Complexity DNA LTR LINE SINE

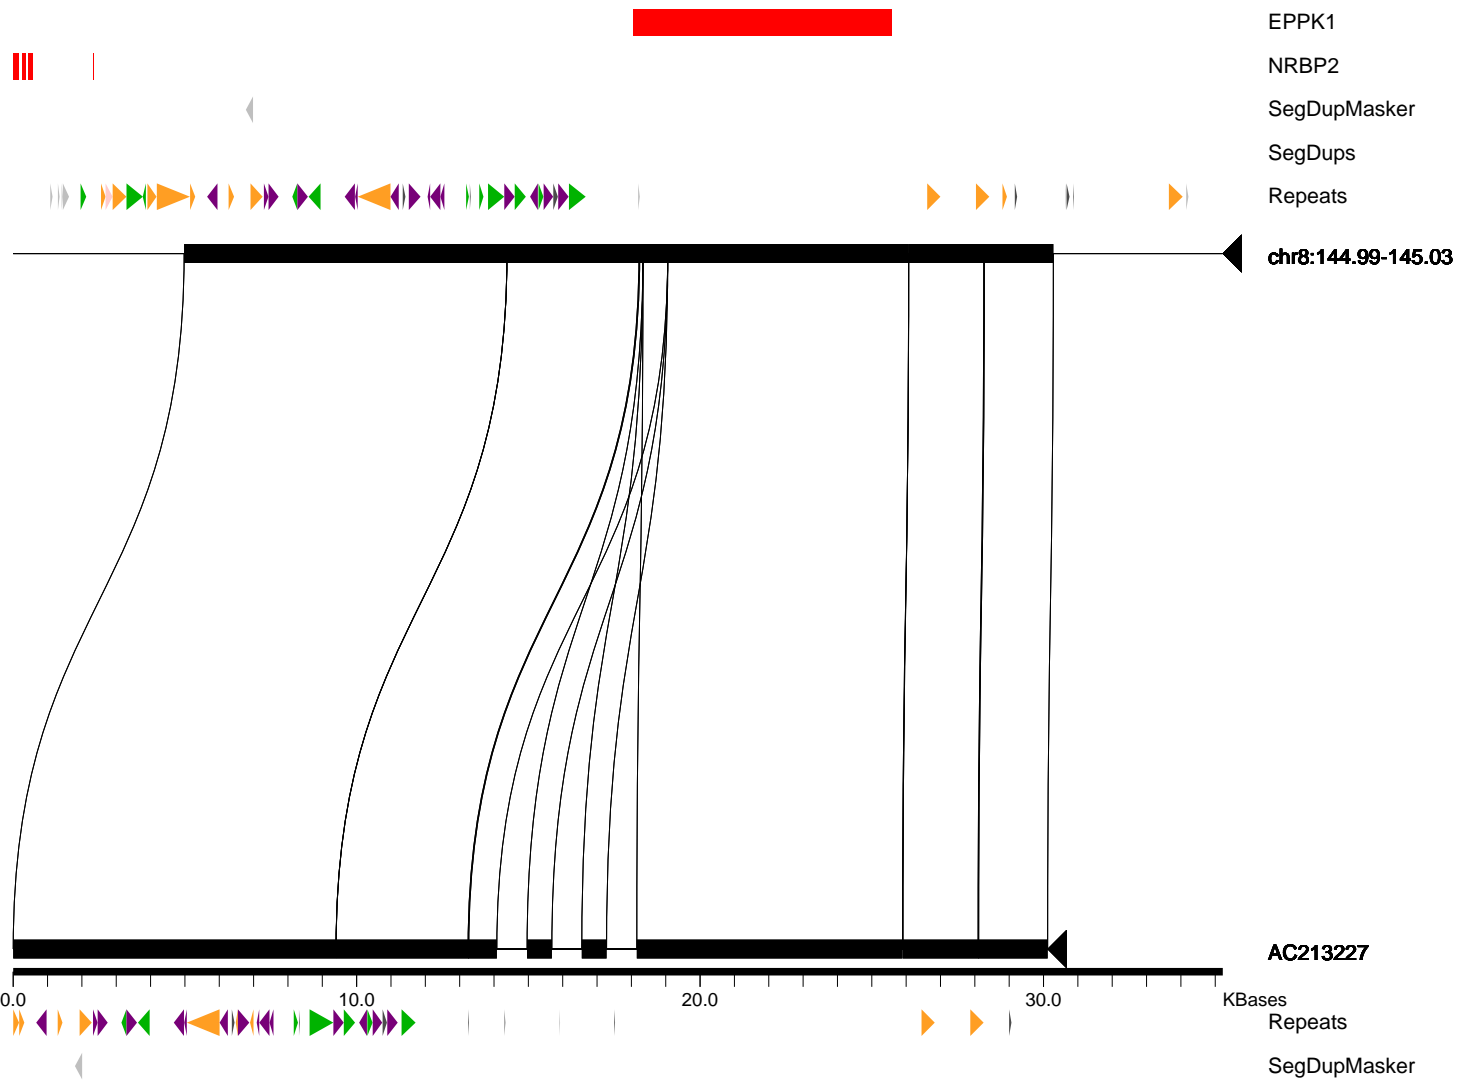



Clone: ABC7\_42515900\_E16 Accession: AC213223

ESP Prediction: S Validation: I Mechanism: NAHR

Other Simple Repeat Low Complexity DNA LTR LINE SINE

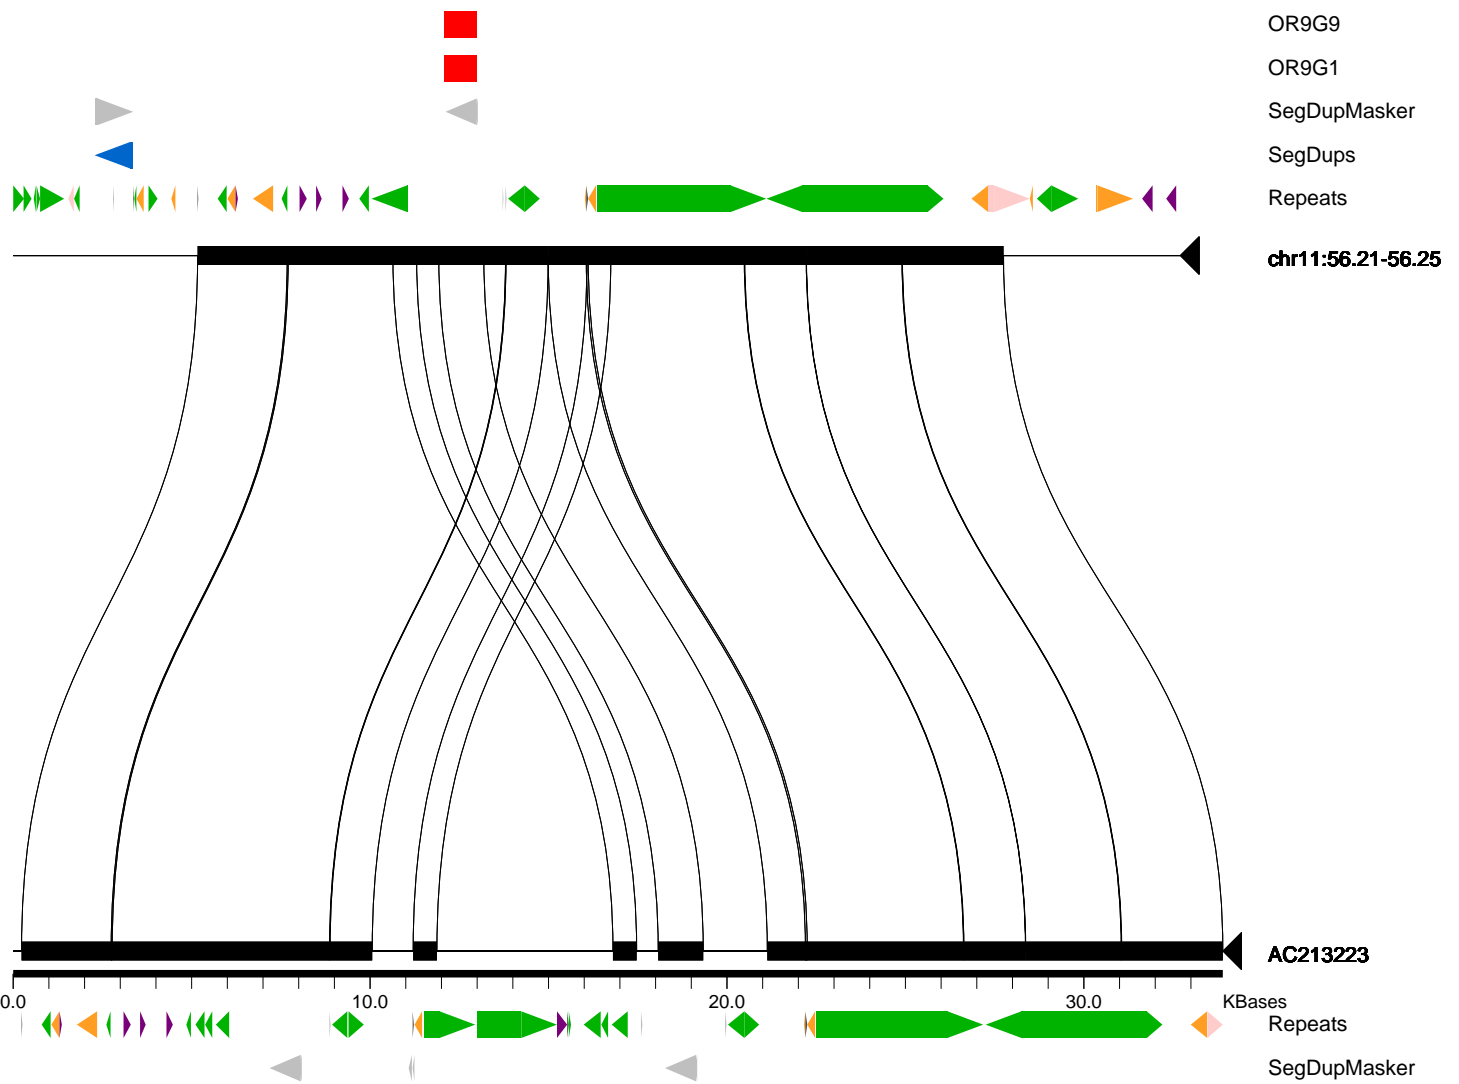

Clone: ABC7\_43063600\_L21 Accession: AC213232

ESP Prediction: B Validation: D Mechanism: NAHR

Other Simple Repeat Low Complexity DNA LTR LINE SINE

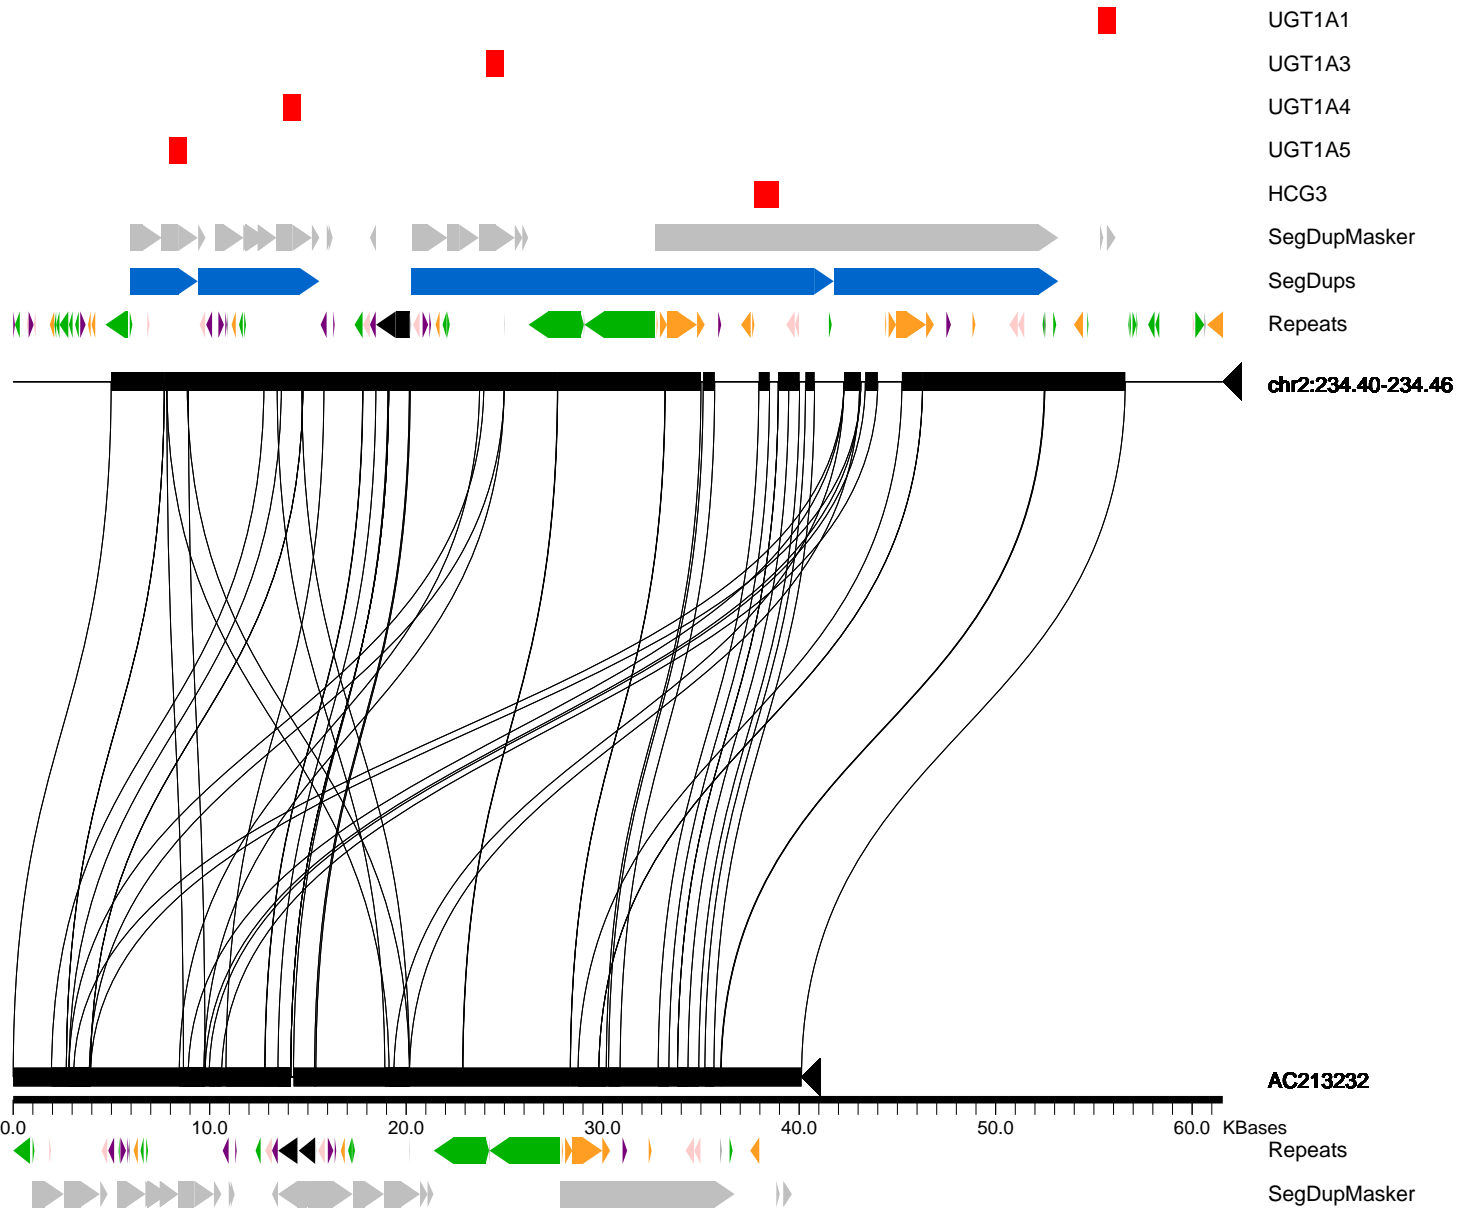

Clone: ABC7\_43099000\_N20 Accession: AC213289  
ESP Prediction: INV Validation: V Mechanism: NAHR(?)

Other Simple Repeat Low Complexity DNA LTR LINE SINE

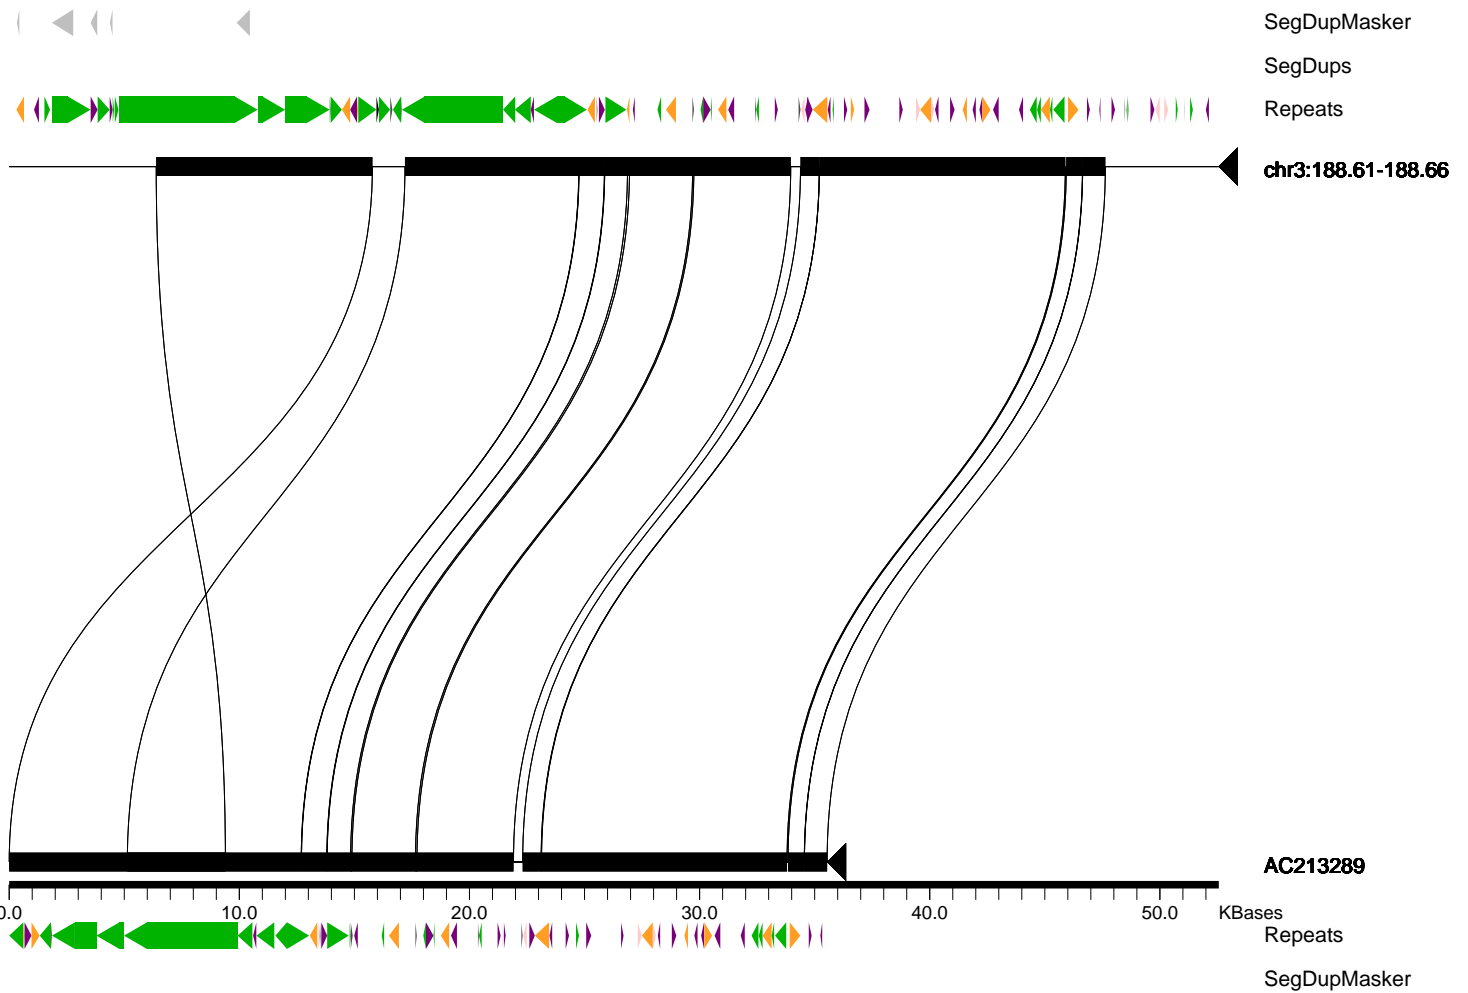

Clone: ABC8\_639722\_O12 Accession: AC213261  
ESP Prediction: B Validation: D Mechanism: NAHR

Other Simple Repeat Low Complexity DNA LTR LINE SINE

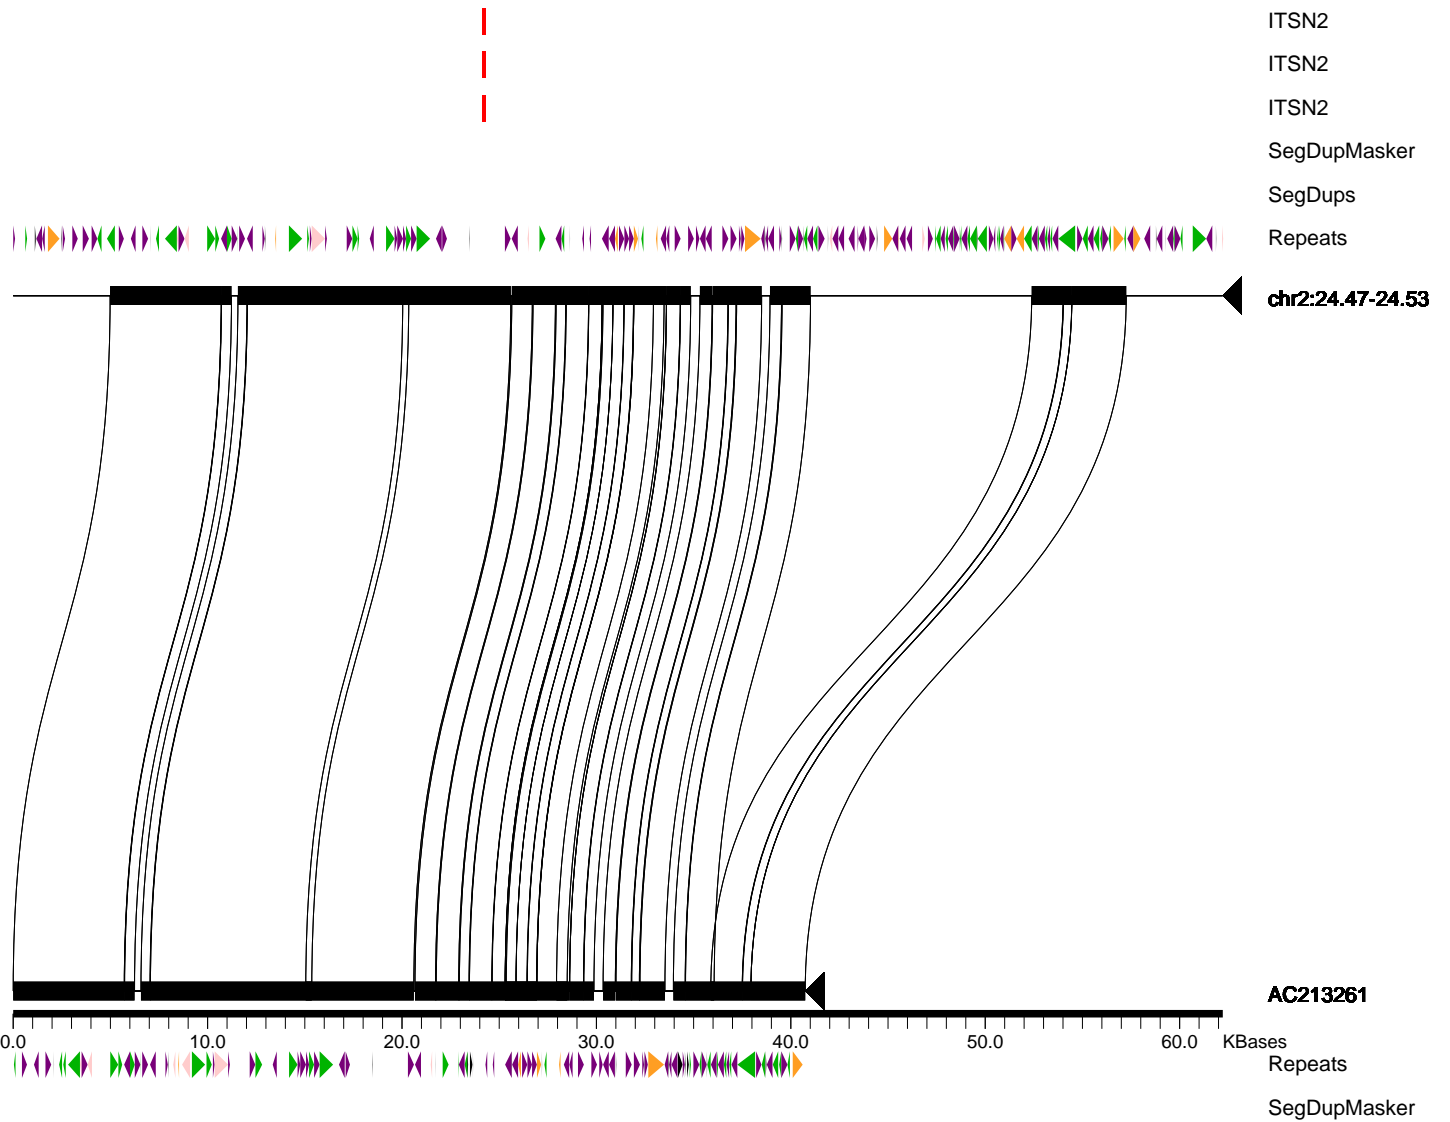

Clone: ABC8\_640622\_C24 Accession: AC213298

ESP Prediction: INV Validation: V Mechanism: NAHR?

Other Simple Repeat Low Complexity DNA LTR LINE SINE

SPP1  
SPP1  
SPP1

SegDupMasker  
SegDups  
Repeats

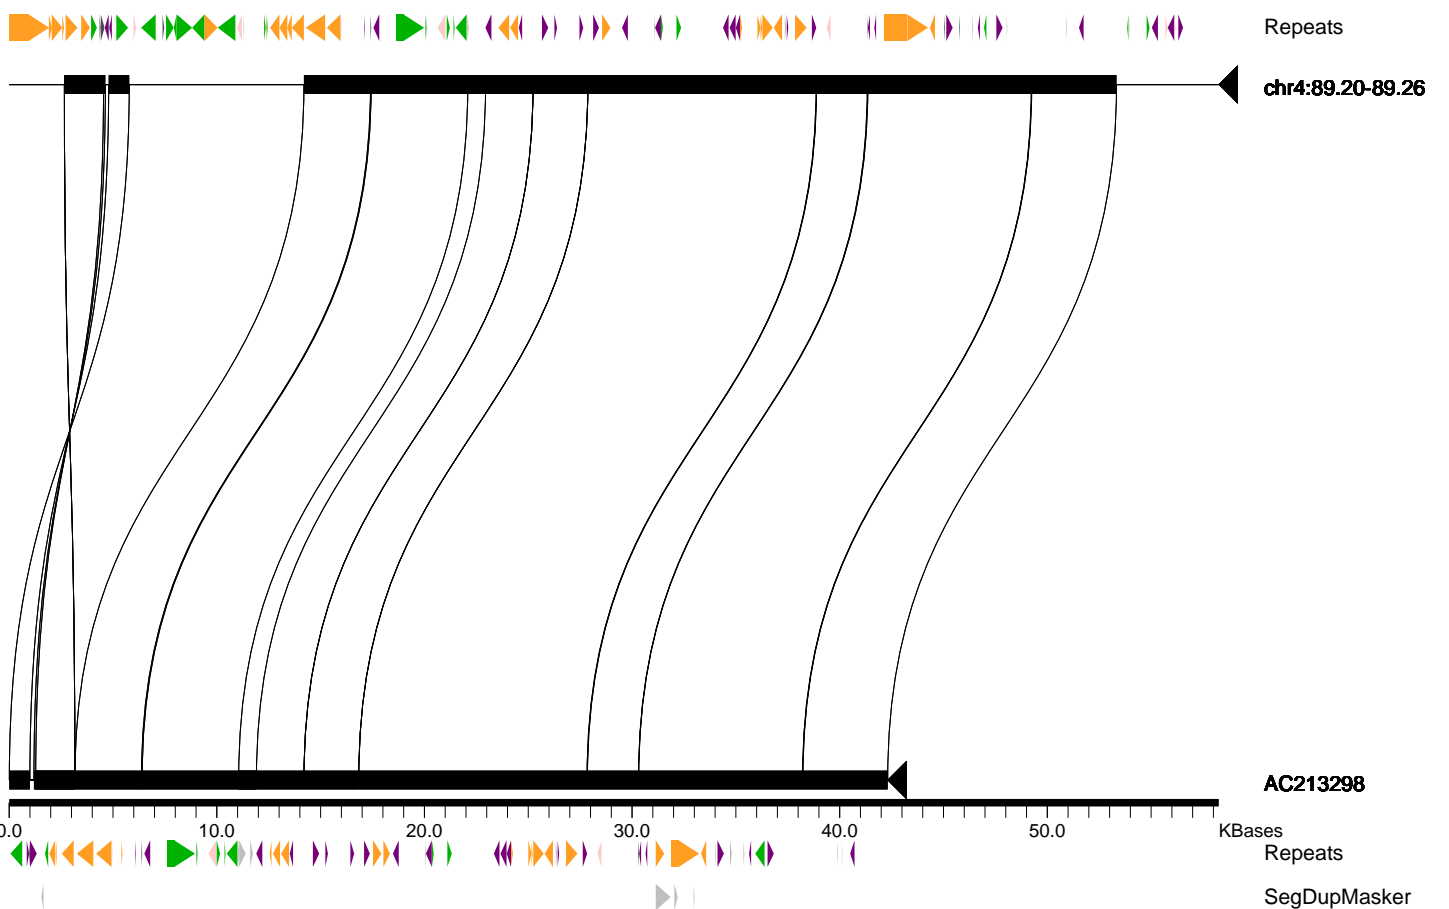

Clone: ABC8\_658822\_H13 Accession: AC213267

ESP Prediction: S Validation: I Mechanism: NAHR

Other Simple Repeat Low Complexity DNA LTR LINE SINE

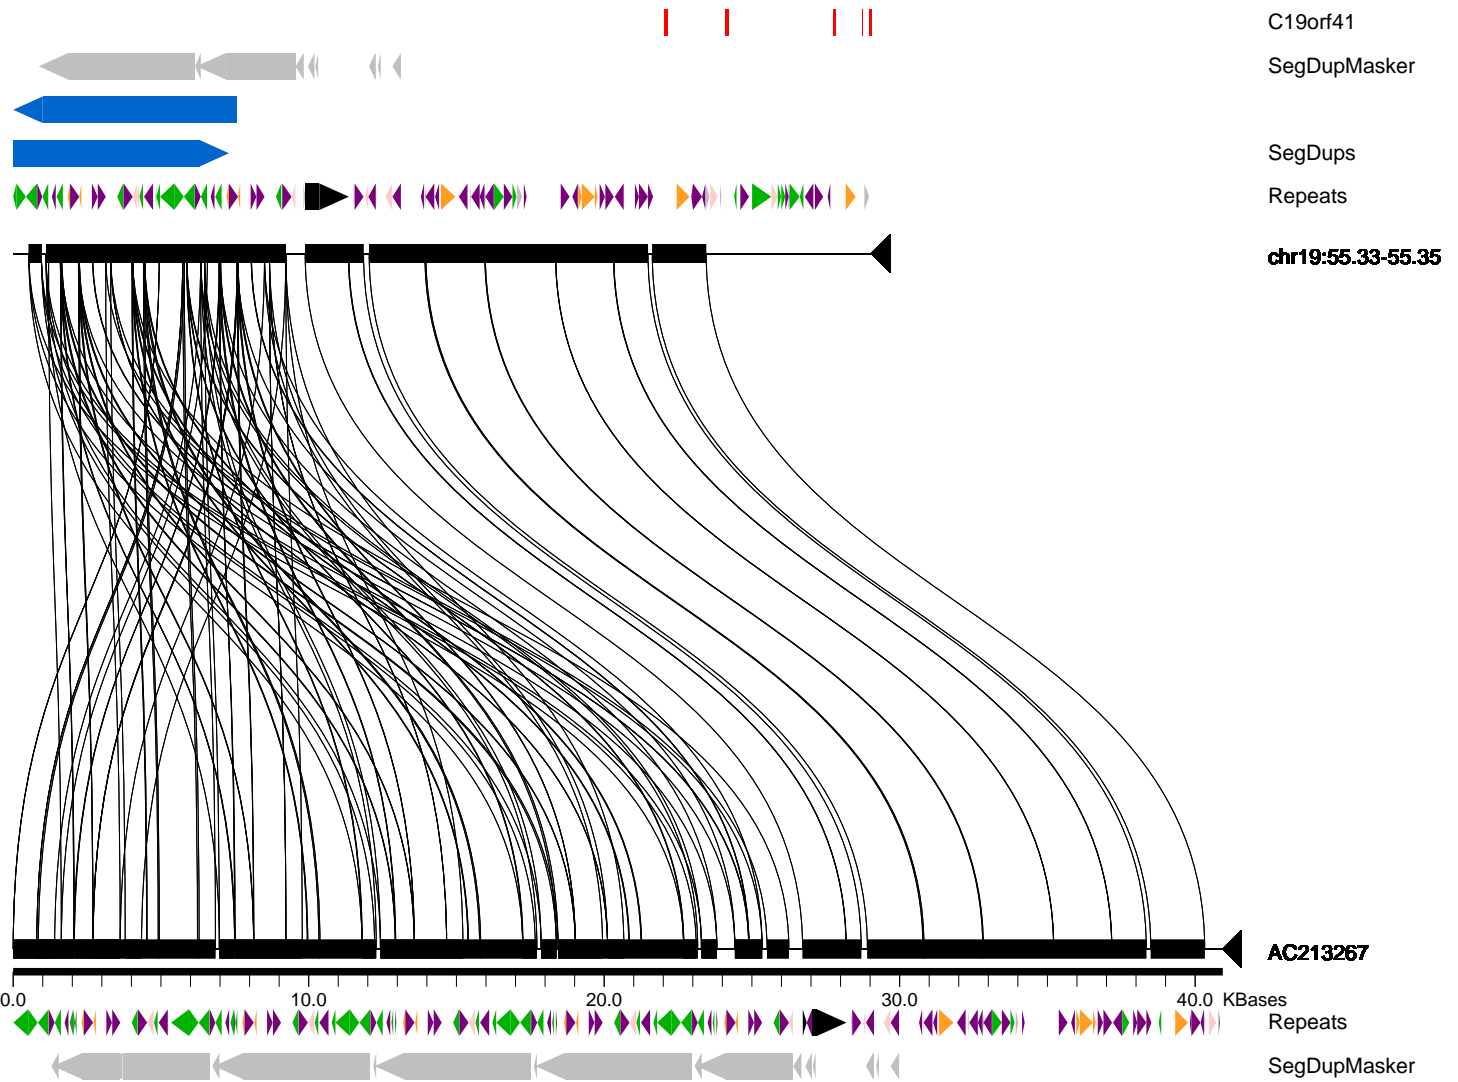

Clone: ABC8\_722840\_O7 Accession: AC213241

ESP Prediction: B Validation: D Mechanism: NAHR

Other Simple Repeat Low Complexity DNA LTR LINE SINE

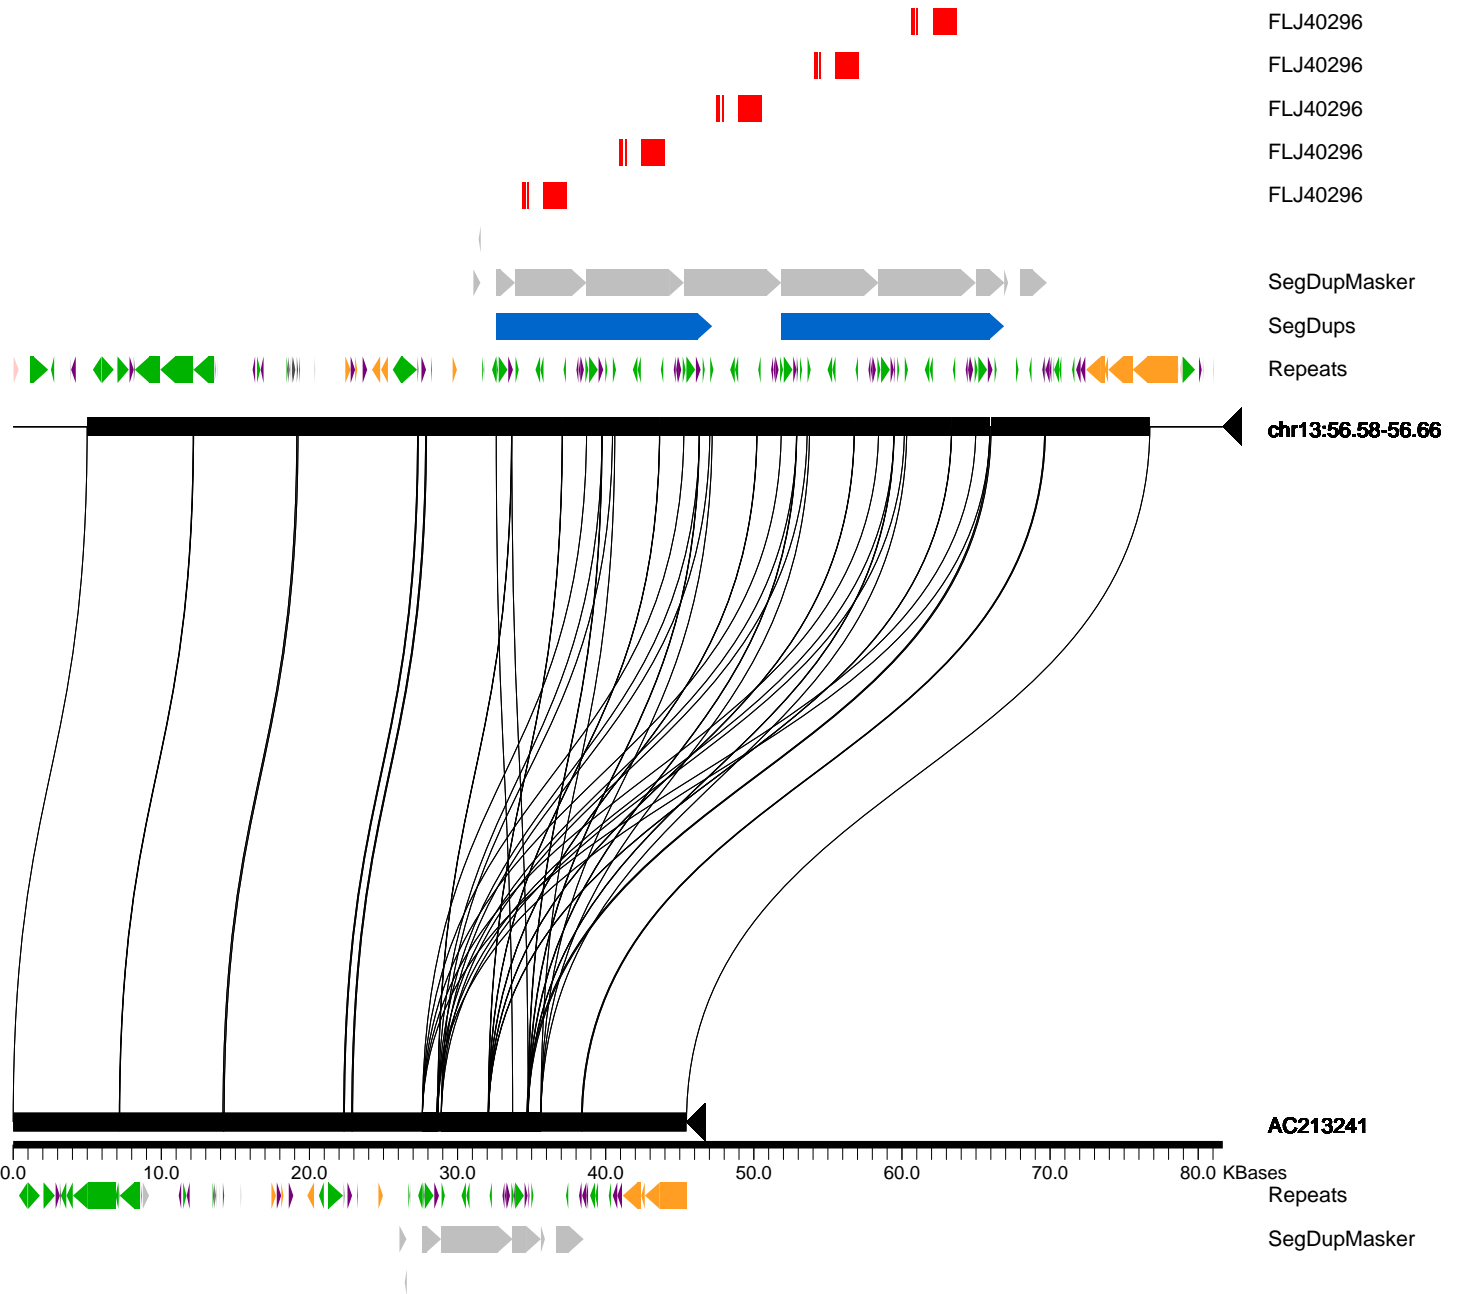

Clone: ABC8\_728340\_A12 Accession: AC213237

ESP Prediction: S Validation: I Mechanism: NAHR

Other Simple Repeat Low Complexity DNA LTR LINE SINE

SegDupMasker

SegDups

Repeats

chr5:94.55-94.58

AC213237

KBases

Repeats

SegDupMasker

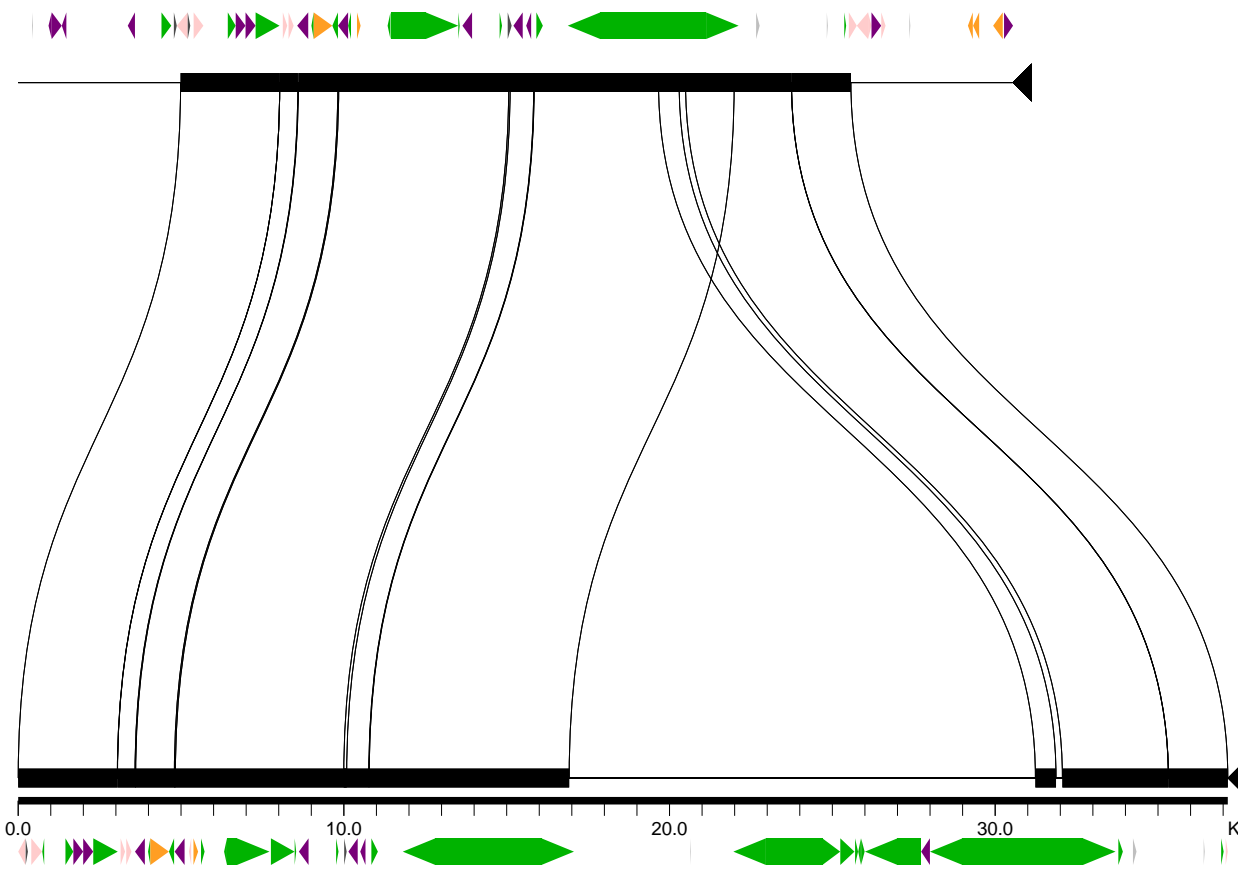



Clone: ABC8\_728840\_K11 Accession: AC213238

ESP Prediction: INV Validation: U Mechanism: NAHR Not finished

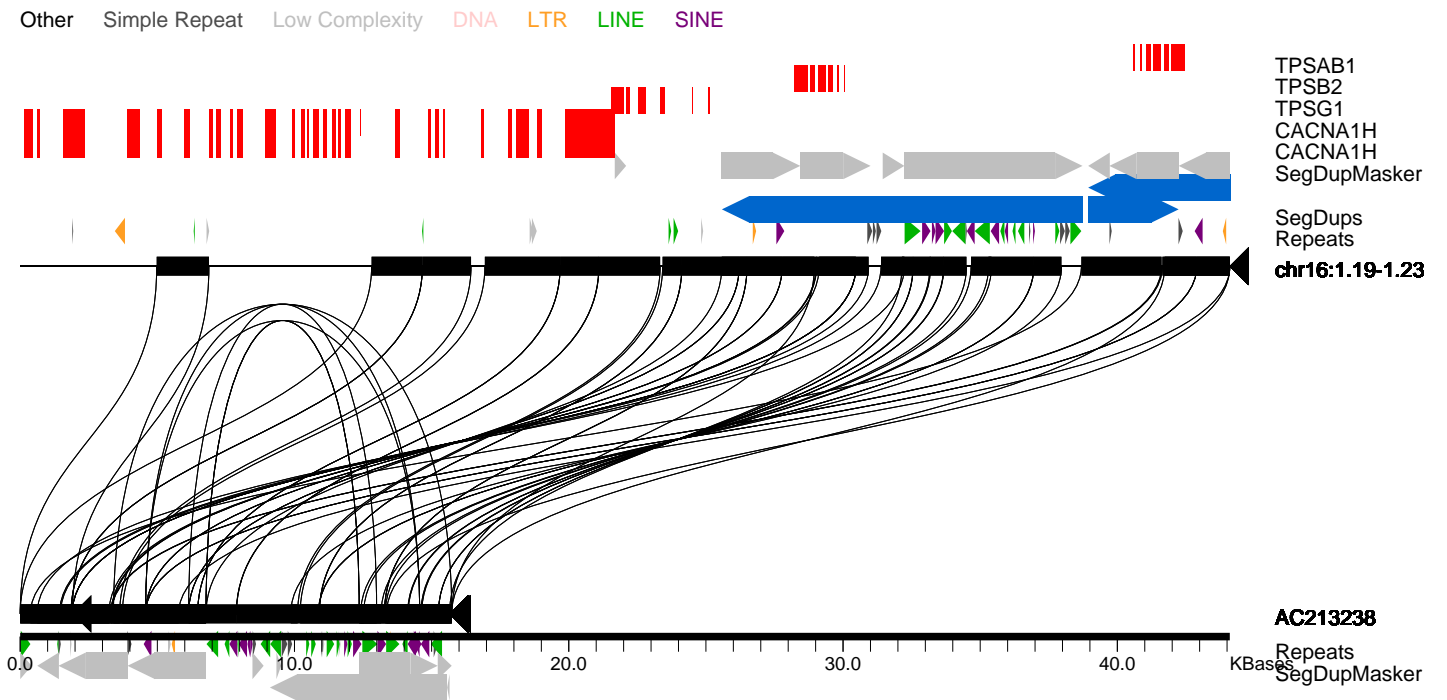

Clone: ABC8\_2625640\_D4 Accession: AC213240

ESP Prediction: S Validation: I Mechanism: NAHR

Other Simple Repeat Low Complexity DNA LTR LINE SINE

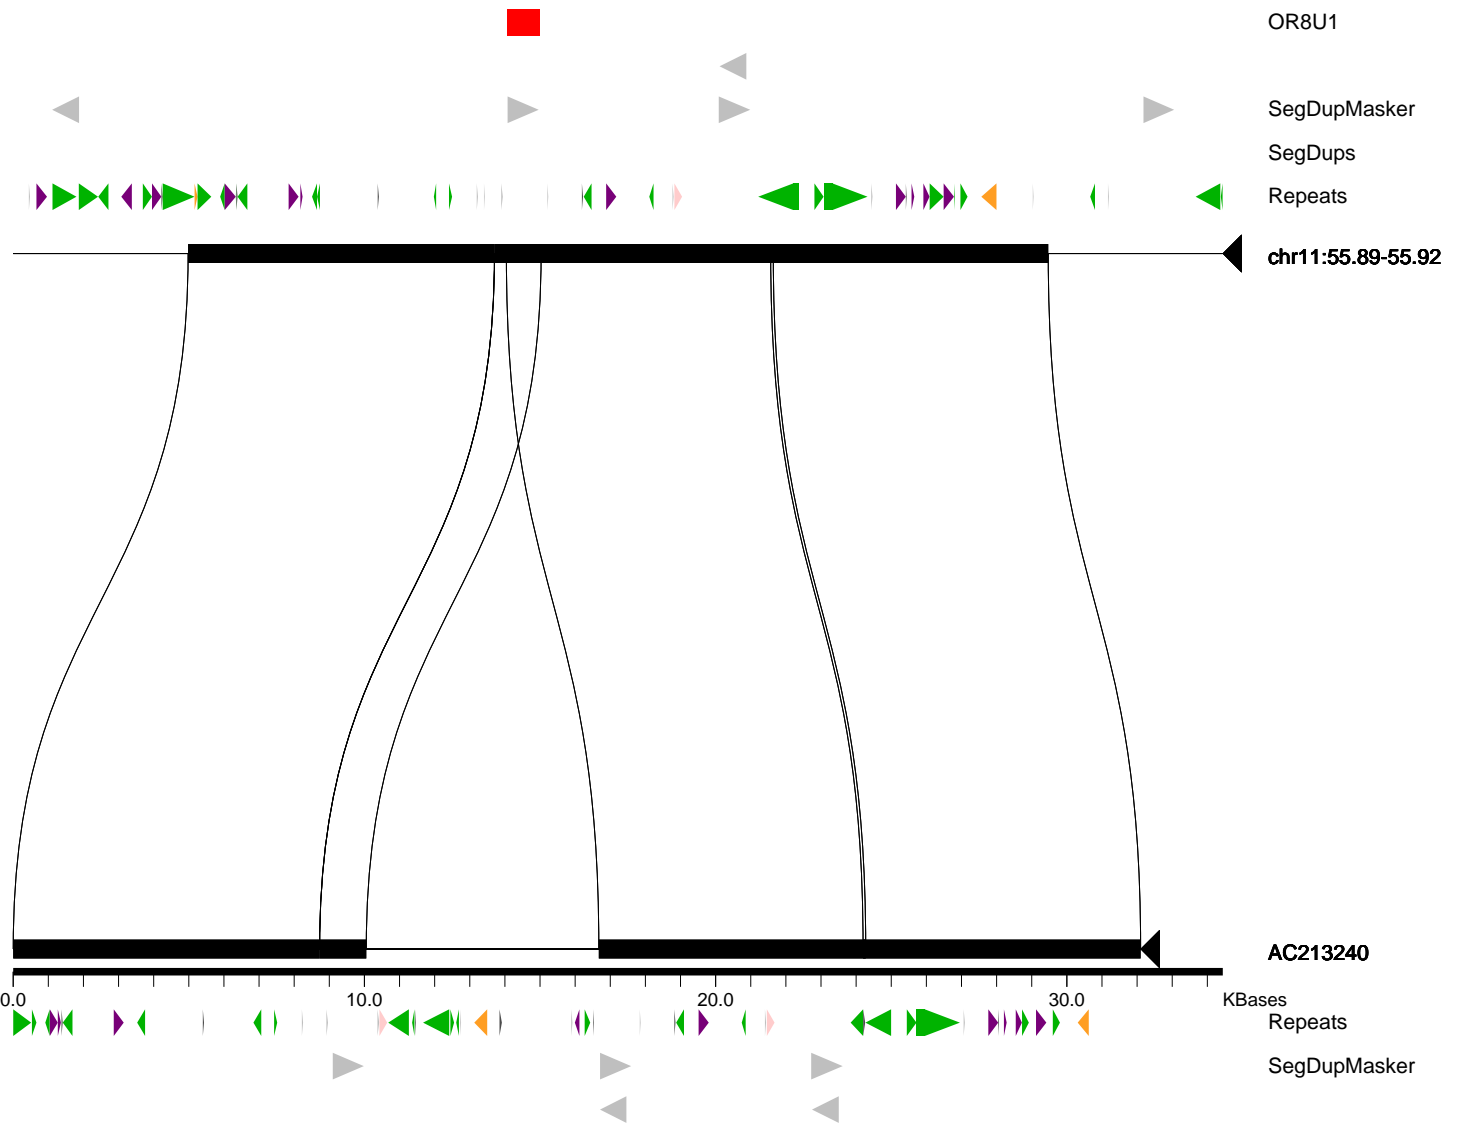

Clone: ABC8\_5705249\_N4 Accession: AC213246

ESP Prediction: B Validation: D,complex Mechanism: NAHR

Other Simple Repeat Low Complexity DNA LTR LINE SINE

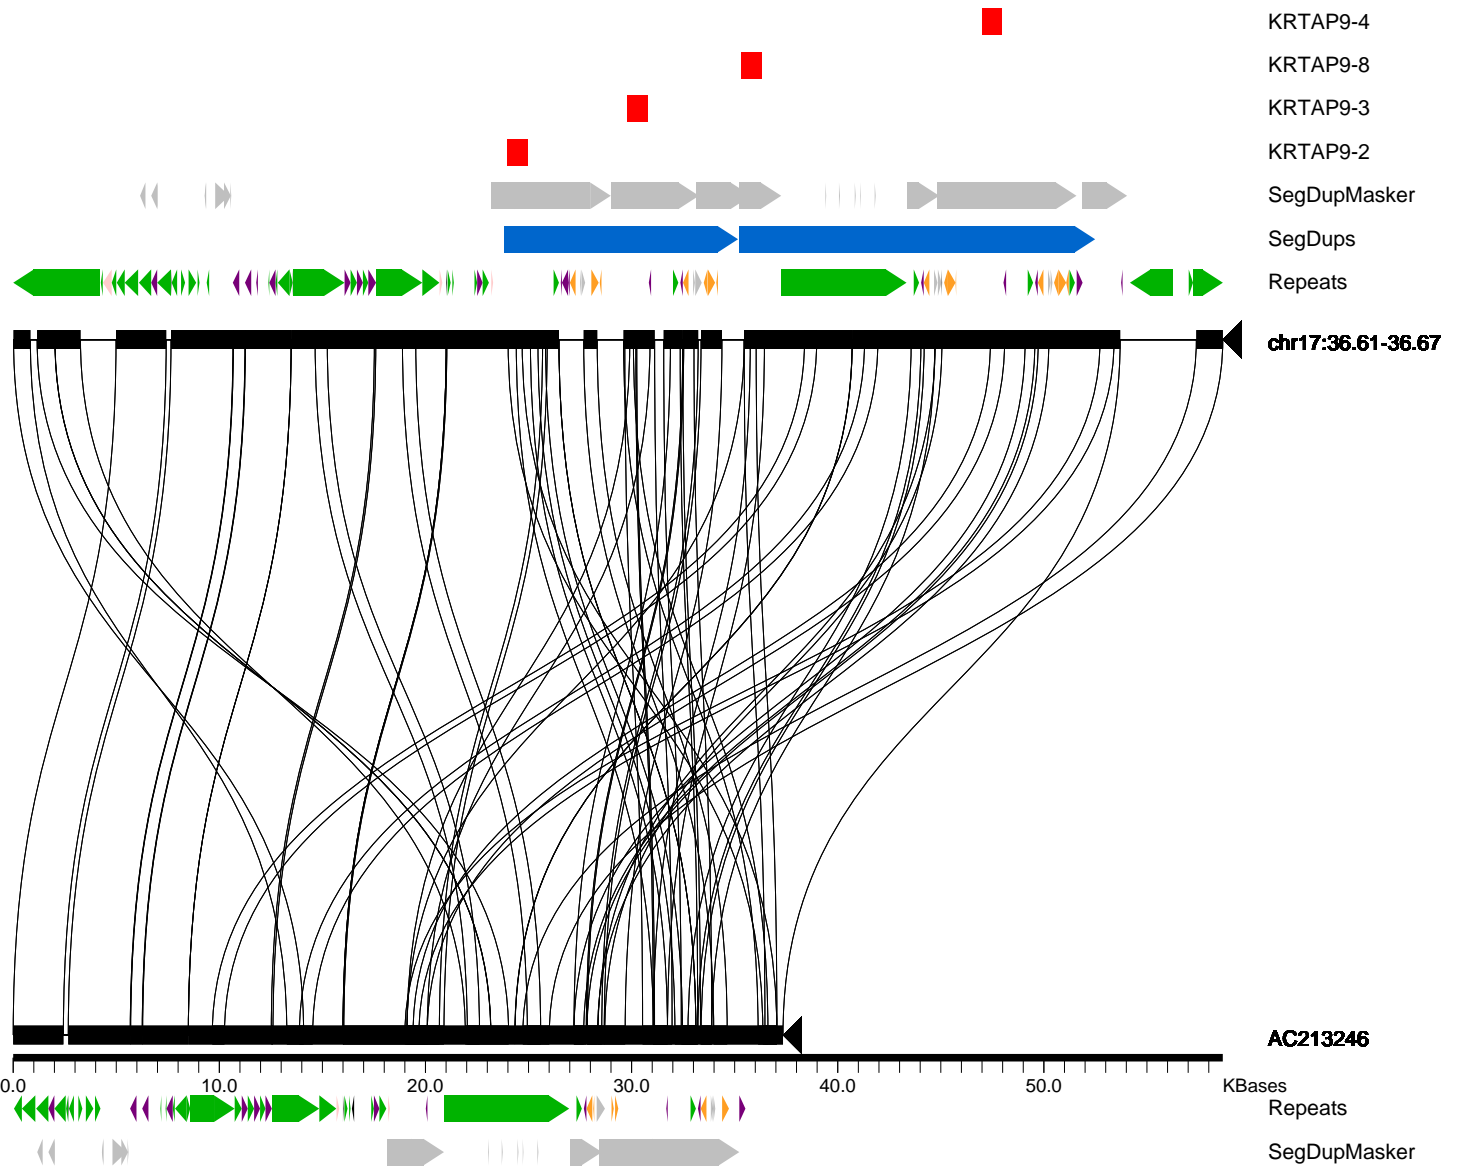

Clone: ABC8\_40857300\_E9 Accession: AC213255  
ESP Prediction: B Validation: D Mechanism: NAHR

Other Simple Repeat Low Complexity DNA LTR LINE SINE

SegDupMasker

SegDups

Repeats

chr2:203.09-203.15

AC213255

Repeats

SegDupMasker

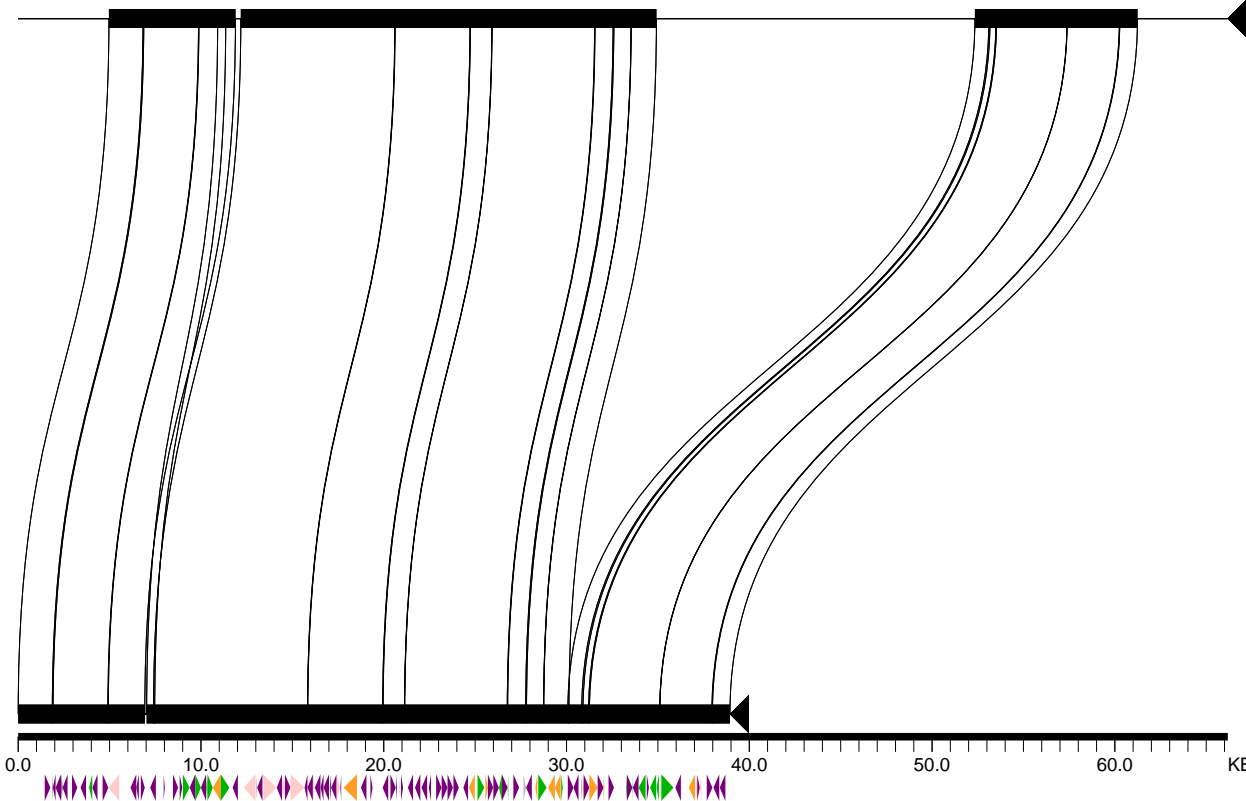

Clone: ABC8\_40867900\_M2 Accession: AC213260  
ESP Prediction: B Validation: D Mechanism: NAHR

Other Simple Repeat Low Complexity DNA LTR LINE SINE

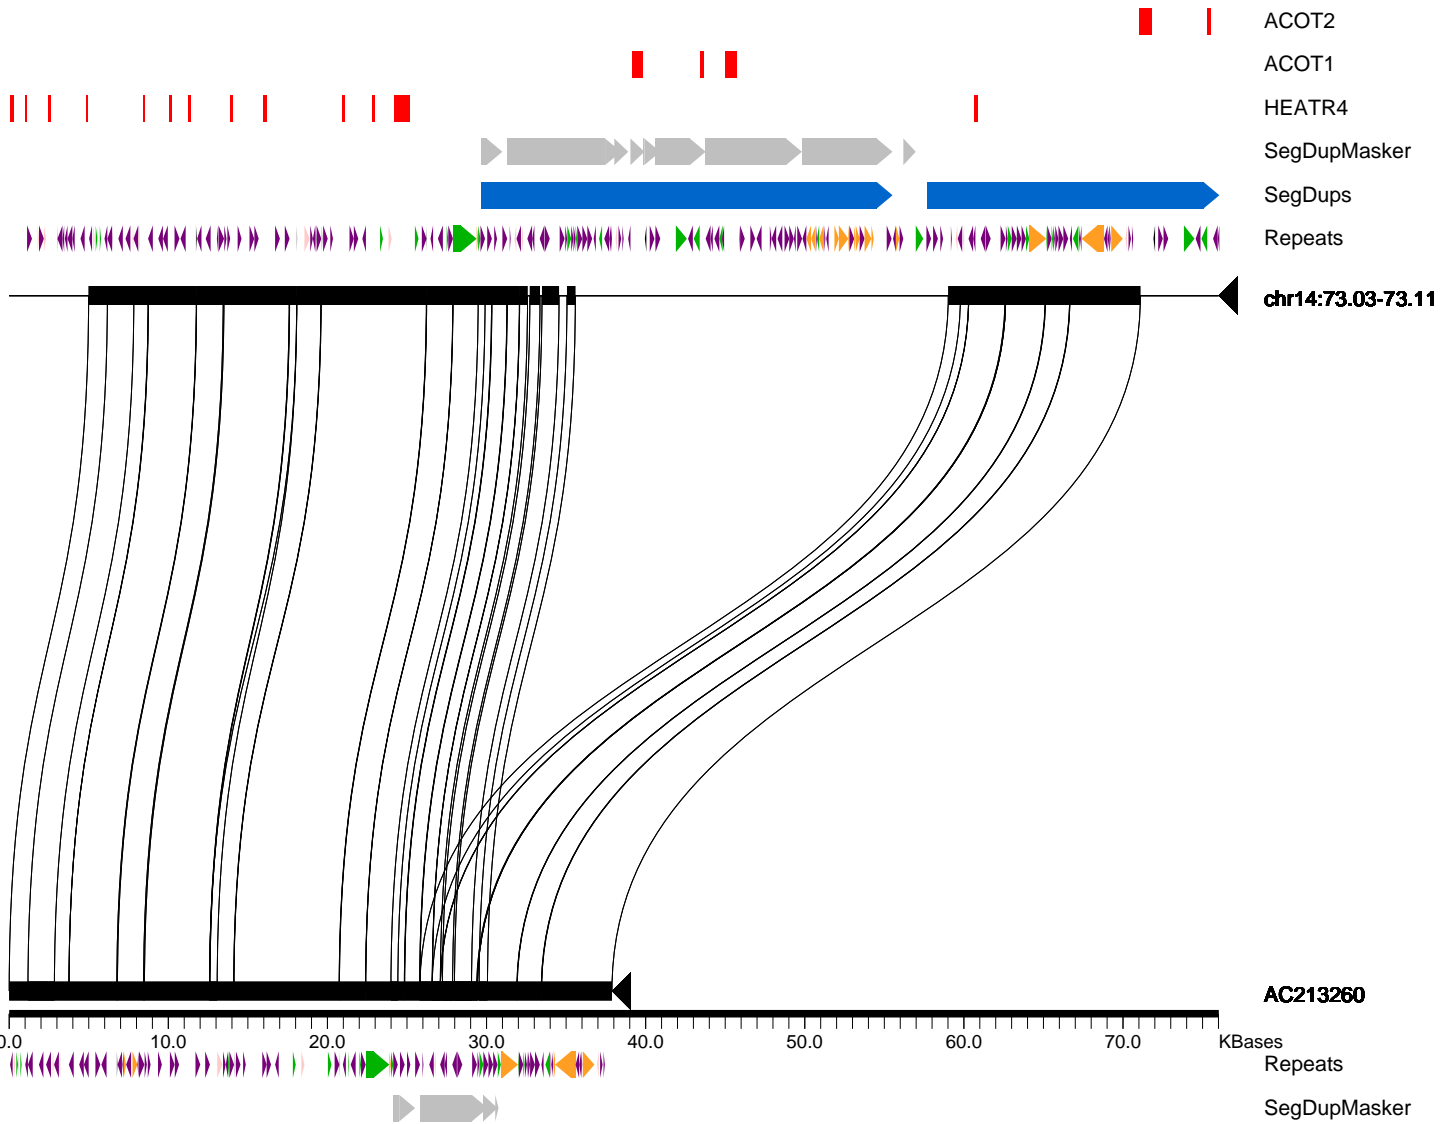

Clone: ABC8\_40870600\_D15 Accession: AC213297

ESP Prediction: B Validation: D Mechanism: NAHR

Other Simple Repeat Low Complexity DNA LTR LINE SINE

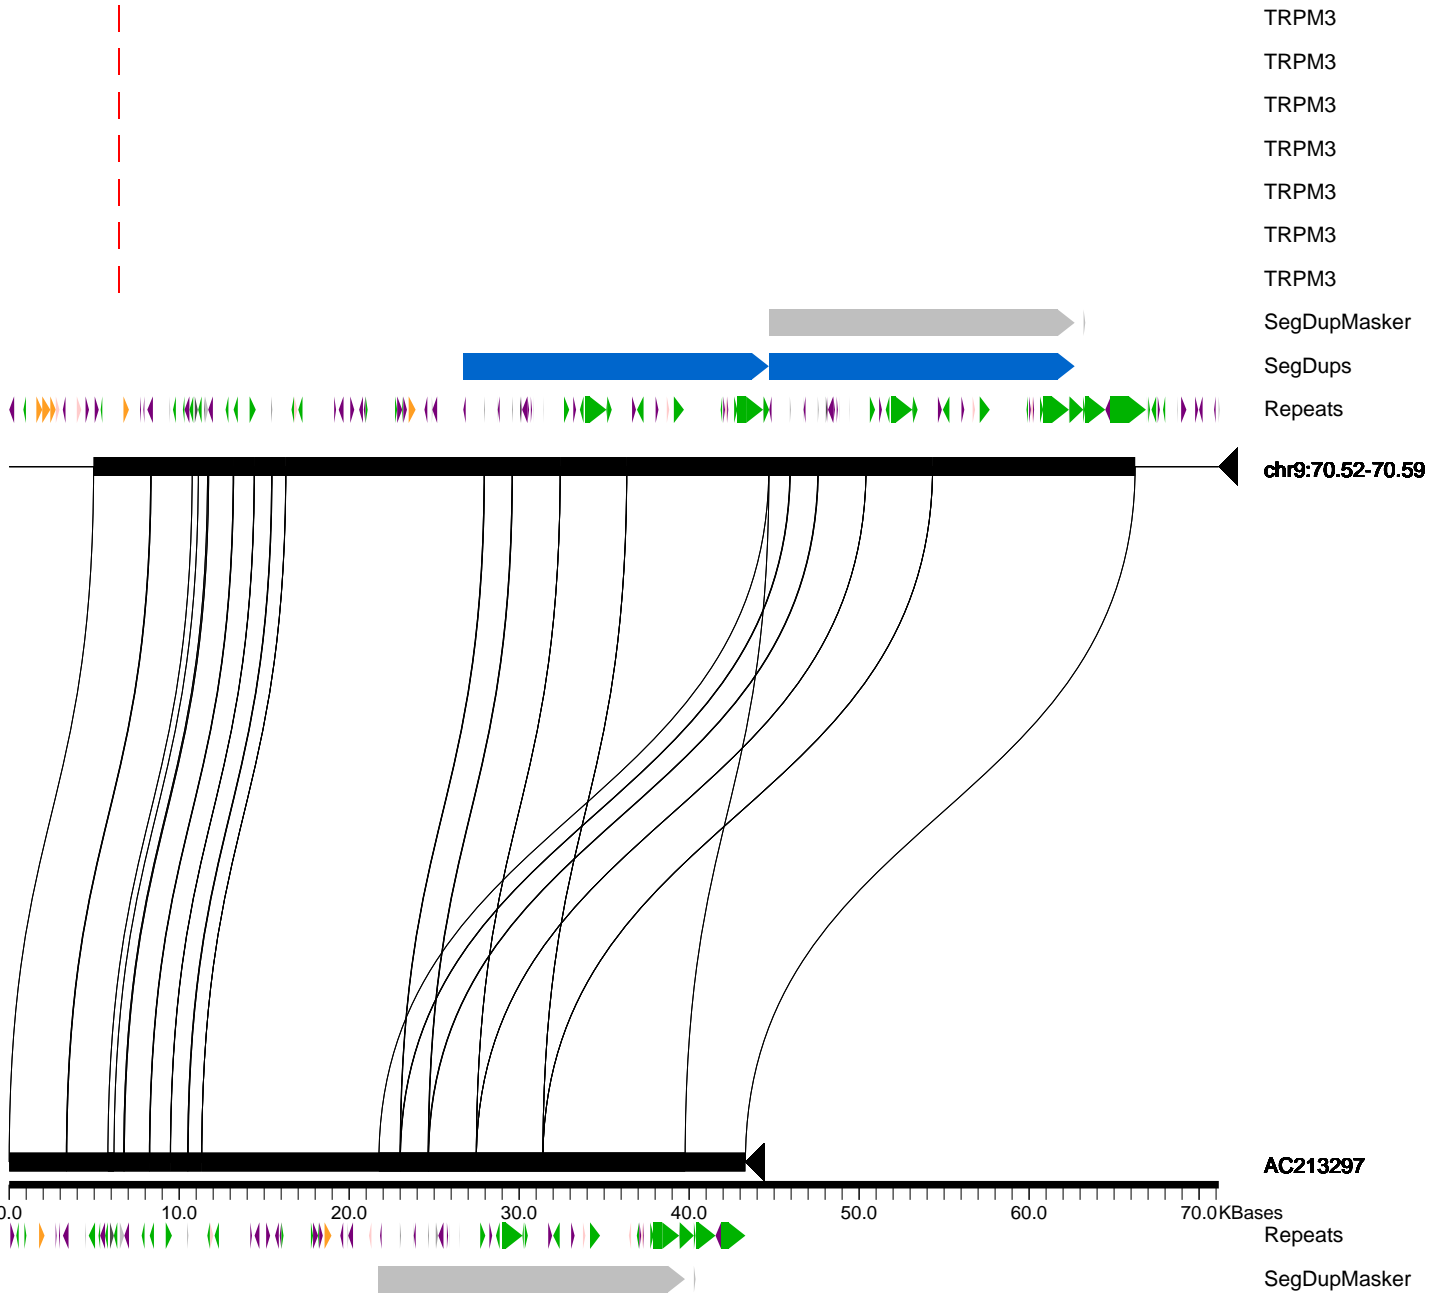

Clone: ABC8\_41028200\_H16 Accession: AC213275  
ESP Prediction: INV Validation: V Mechanism: NAHR

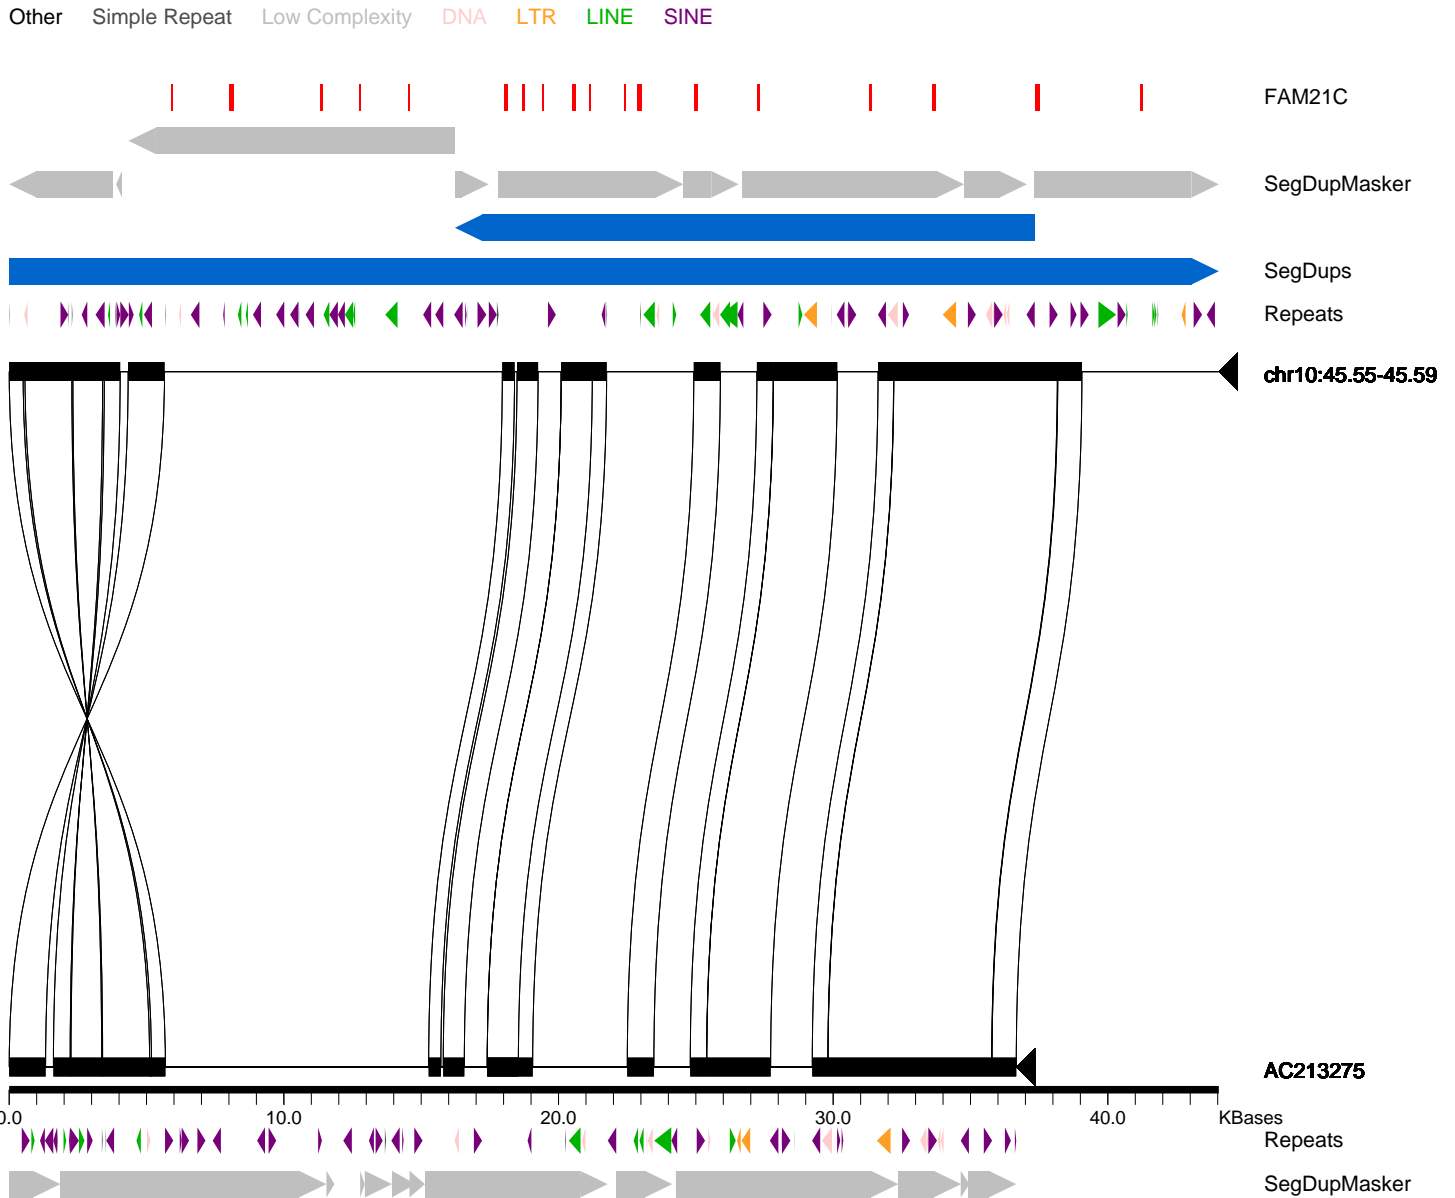

Clone: ABC8\_42079300\_H10 Accession: AC213243

ESP Prediction: B Validation: D Mechanism: NAHR

Other Simple Repeat Low Complexity DNA LTR LINE SINE

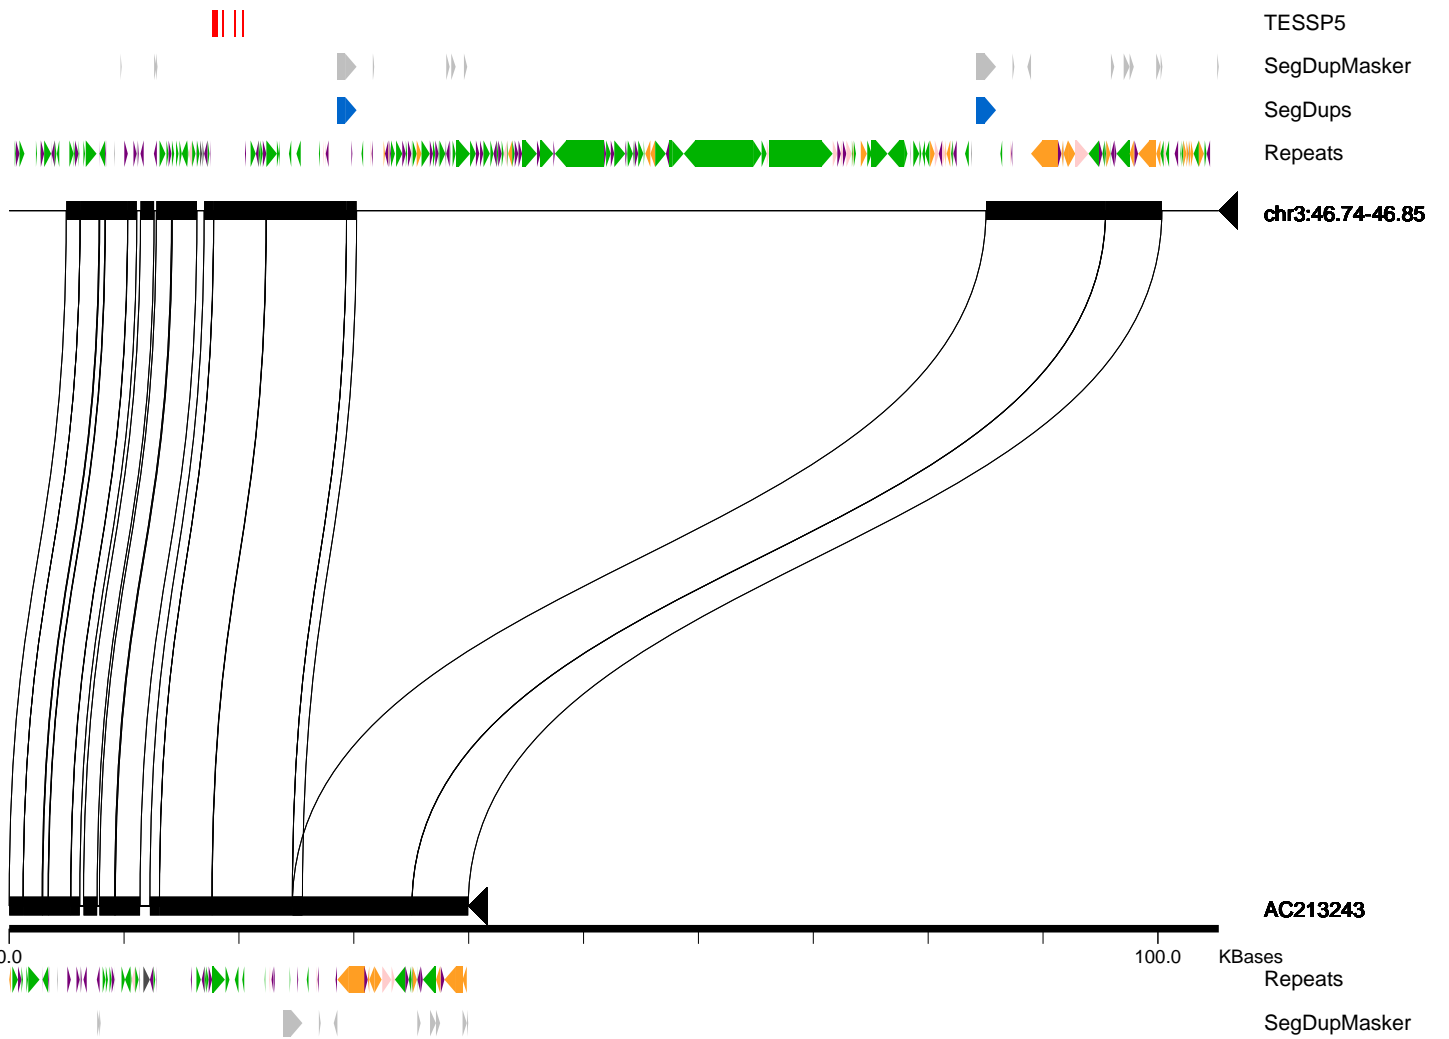



Clone: ABC8\_42110100\_M24 Accession: AC213253  
ESP Prediction: INV Validation: V Mechanism: NAHR

Other Simple Repeat Low Complexity DNA LTR LINE SINE

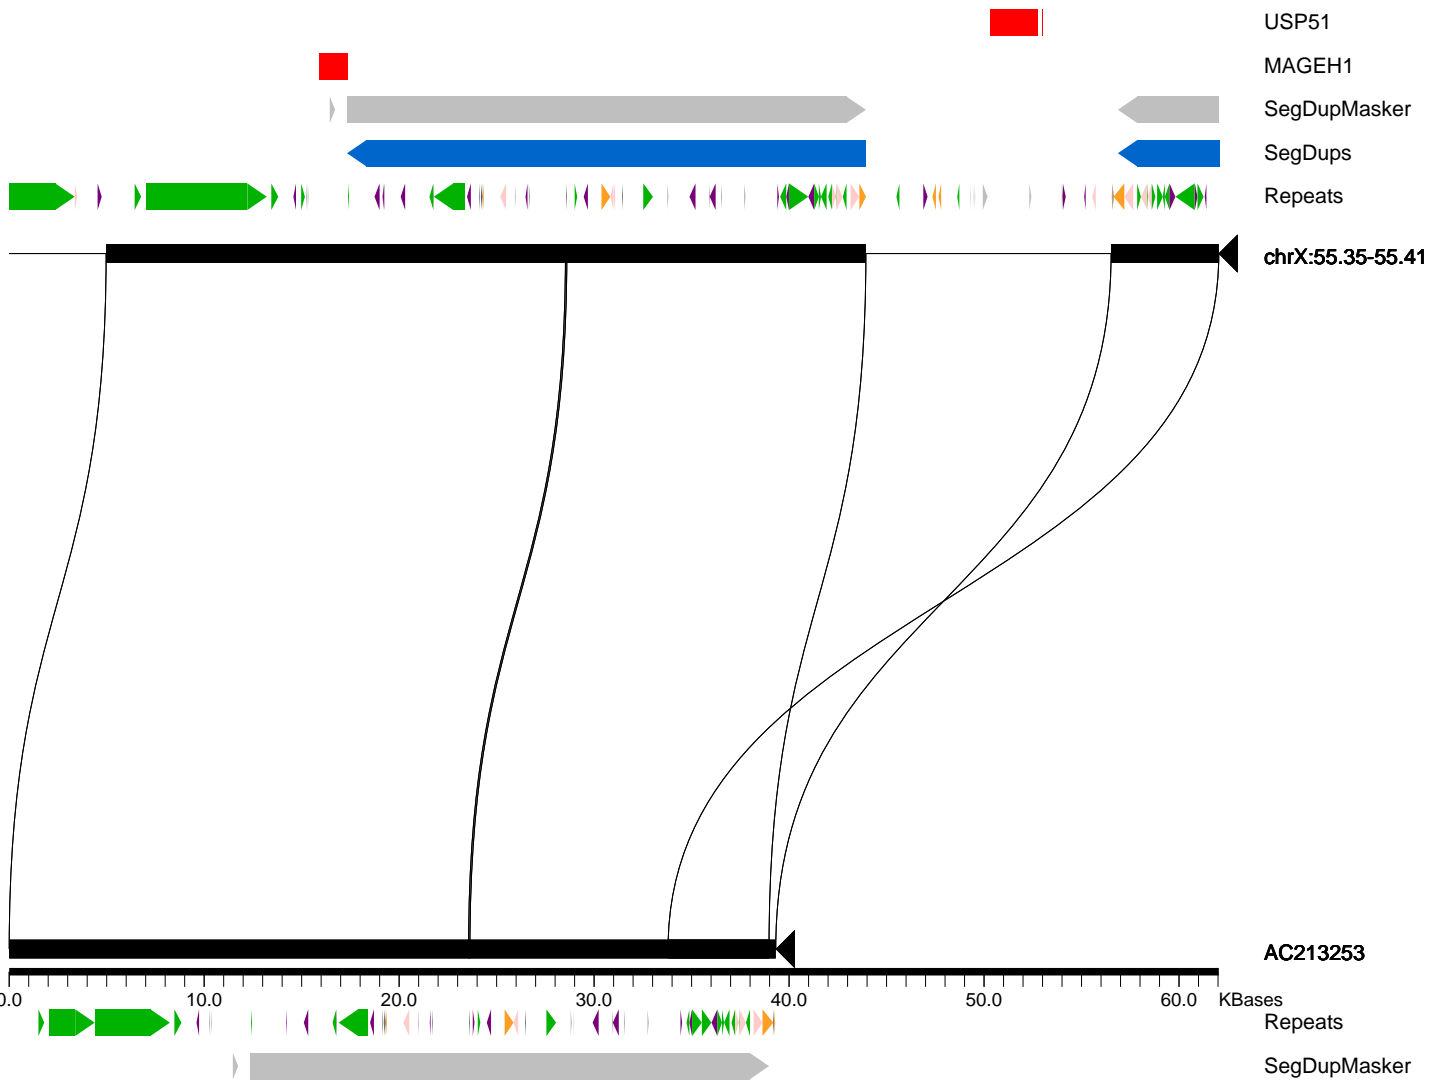

Clone: WIBR2-3336L11 Accession: AC193169

ESP Prediction: INV Validation: V Mechanism: NAHR?

Other Simple Repeat Low Complexity DNA LTR LINE SINE

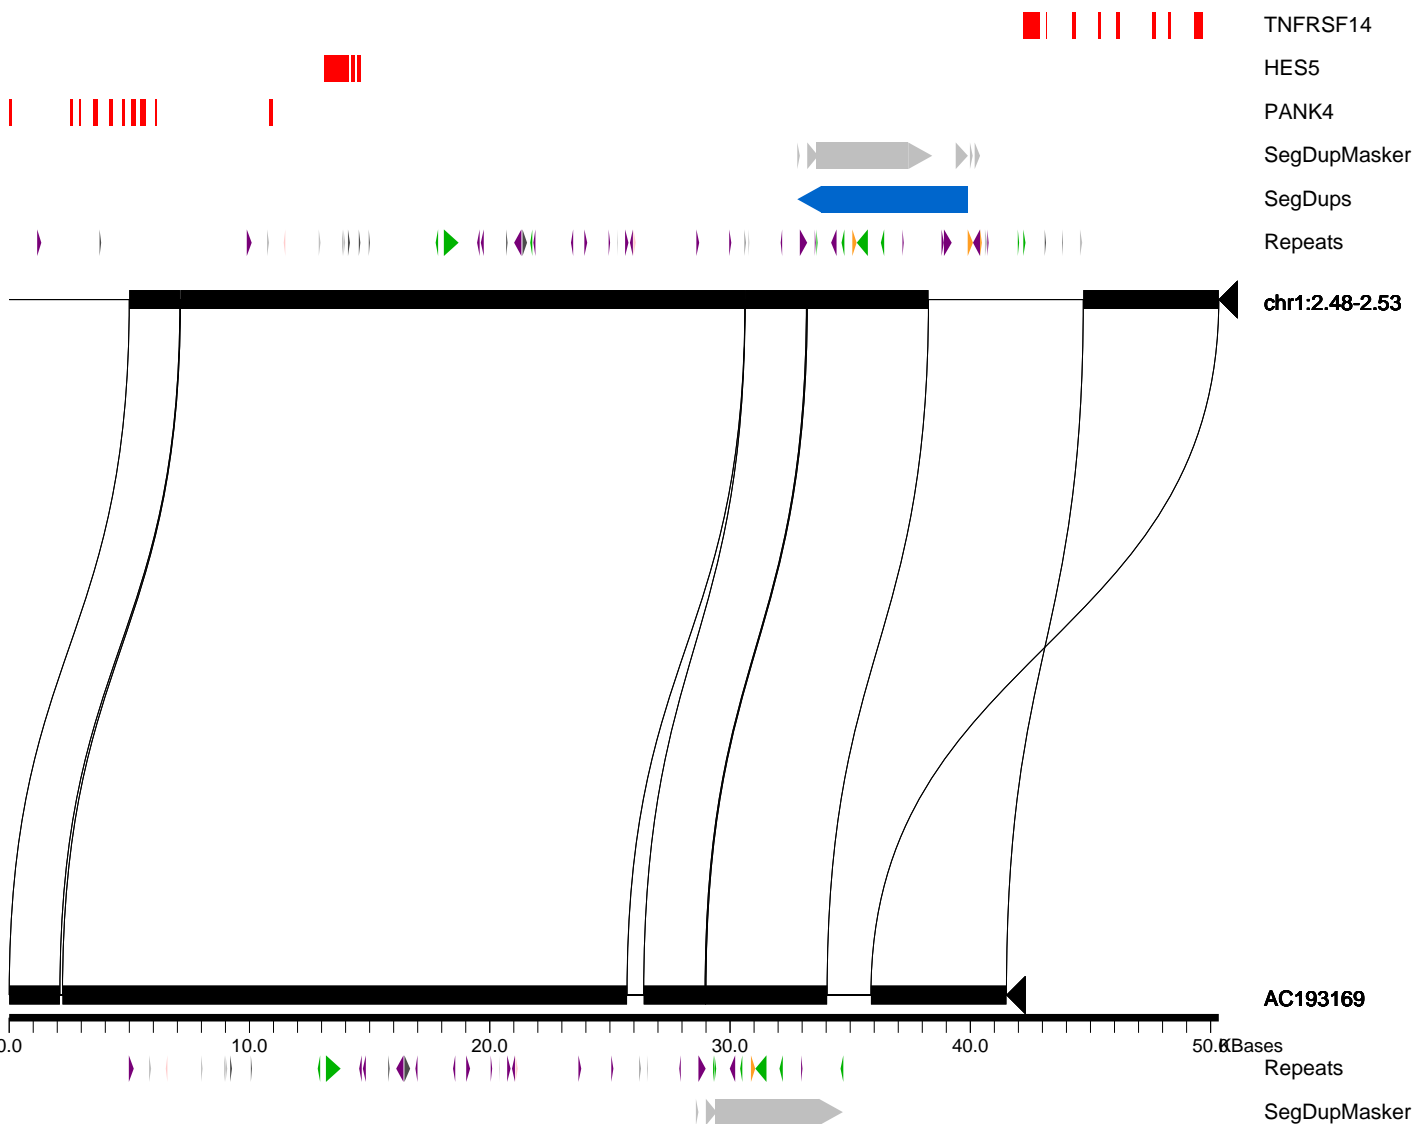

Clone: WIBR2-3198C10 Accession: AC193166

ESP Prediction: B Validation: D Mechanism: NAHR

Other Simple Repeat Low Complexity DNA LTR LINE SINE

LCE1C  
LCE1D  
LCE1E  
LCE1F  
KPRP

SegDupMasker  
SegDups  
Repeats

chr1:149.53-149.59

AC193166

Repeats  
SegDupMasker

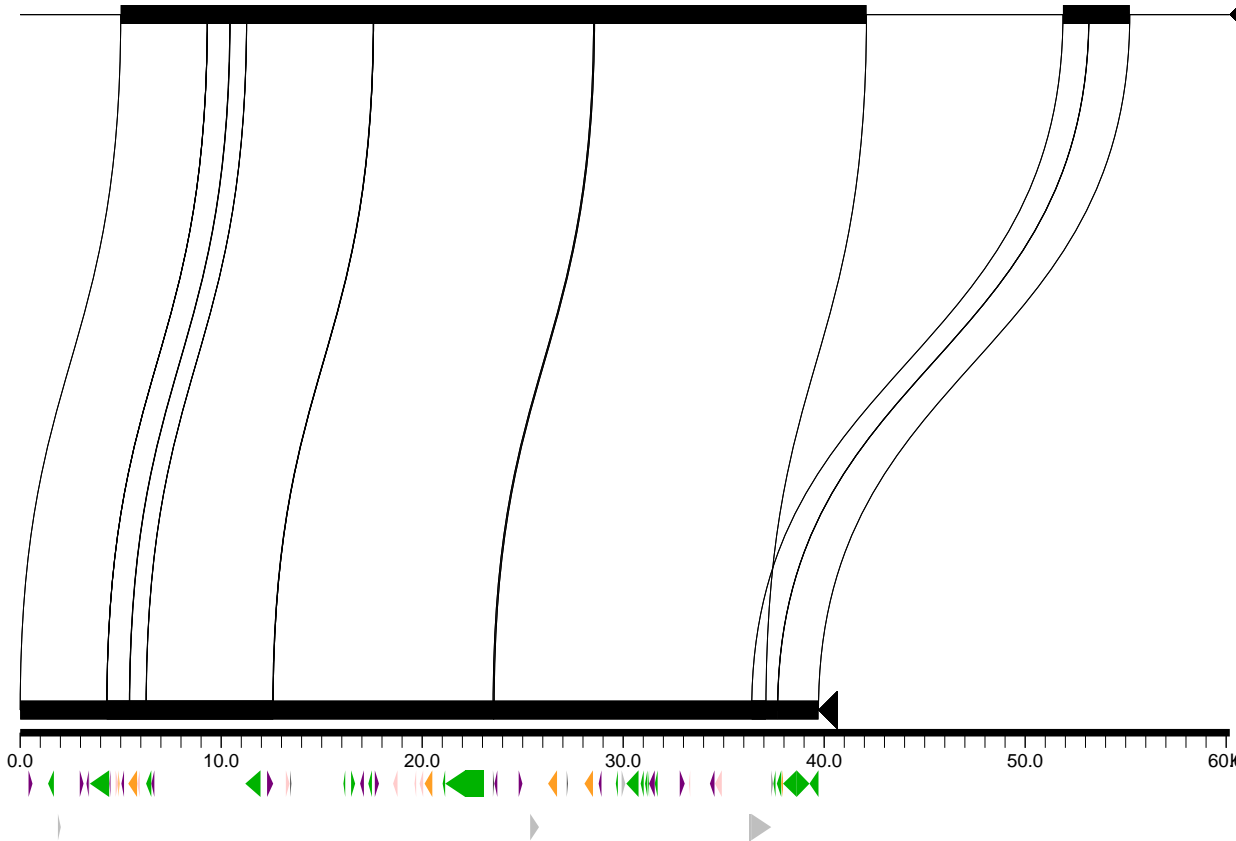

Clone: WIBR2-3221E03 Accession: AC195744

ESP Prediction: S Validation: I,complex Mechanism: NAHR

Other Simple Repeat Low Complexity DNA LTR LINE SINE

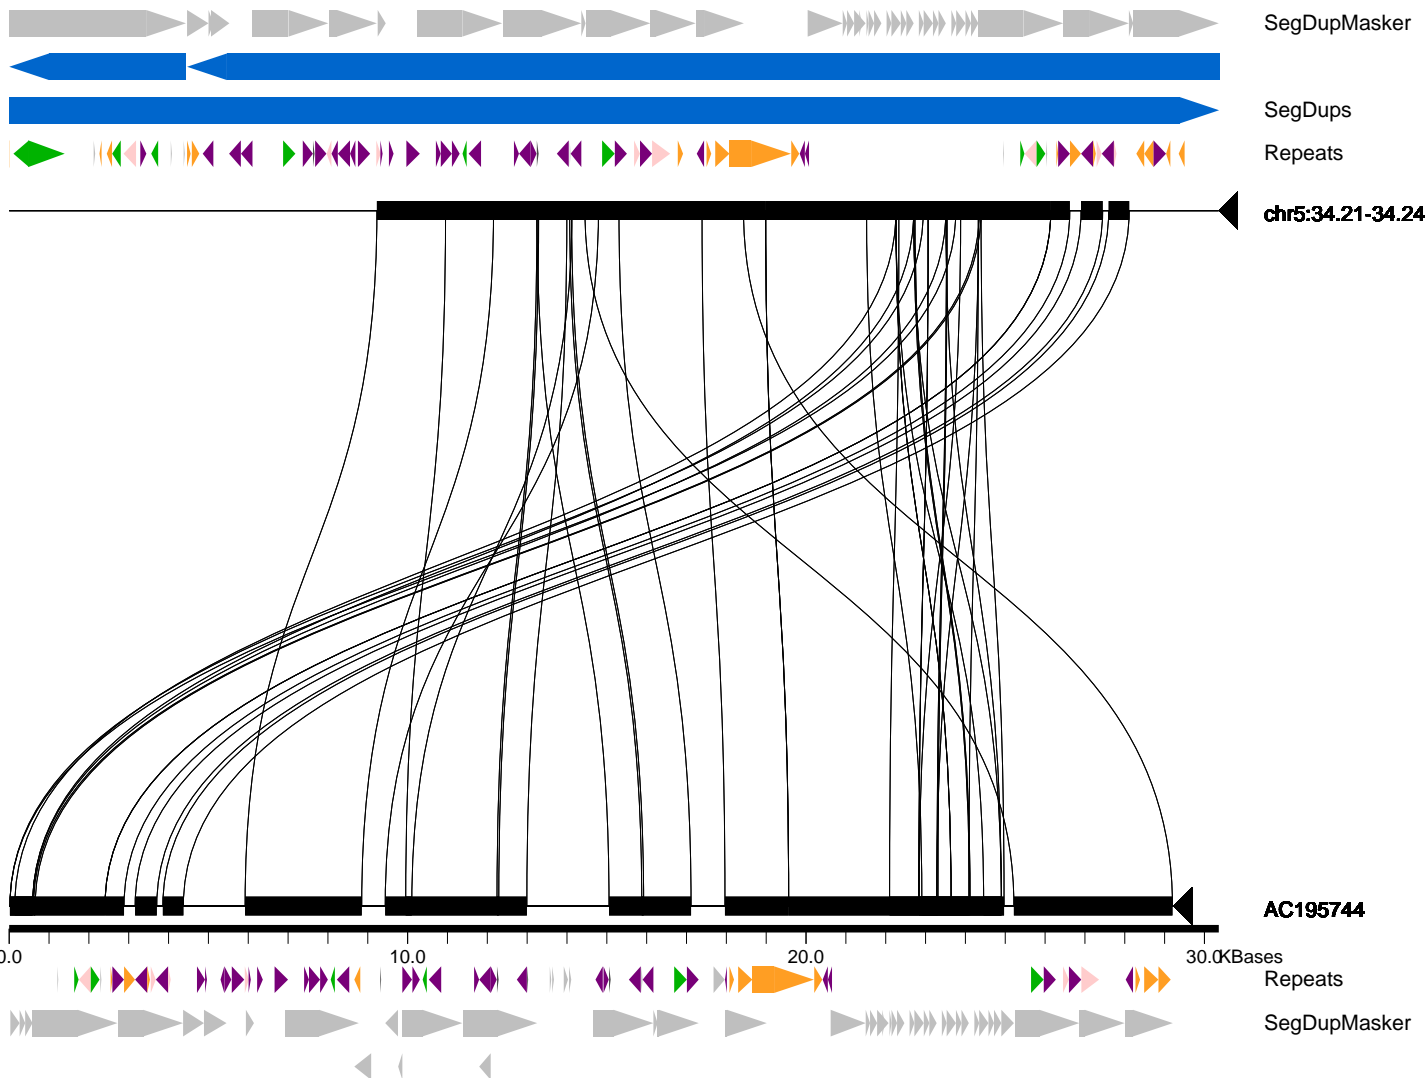

Clone: WIBR2-3011J02 Accession: AC153469

ESP Prediction: B Validation: D Mechanism: NAHR

Other Simple Repeat Low Complexity DNA LTR LINE SINE

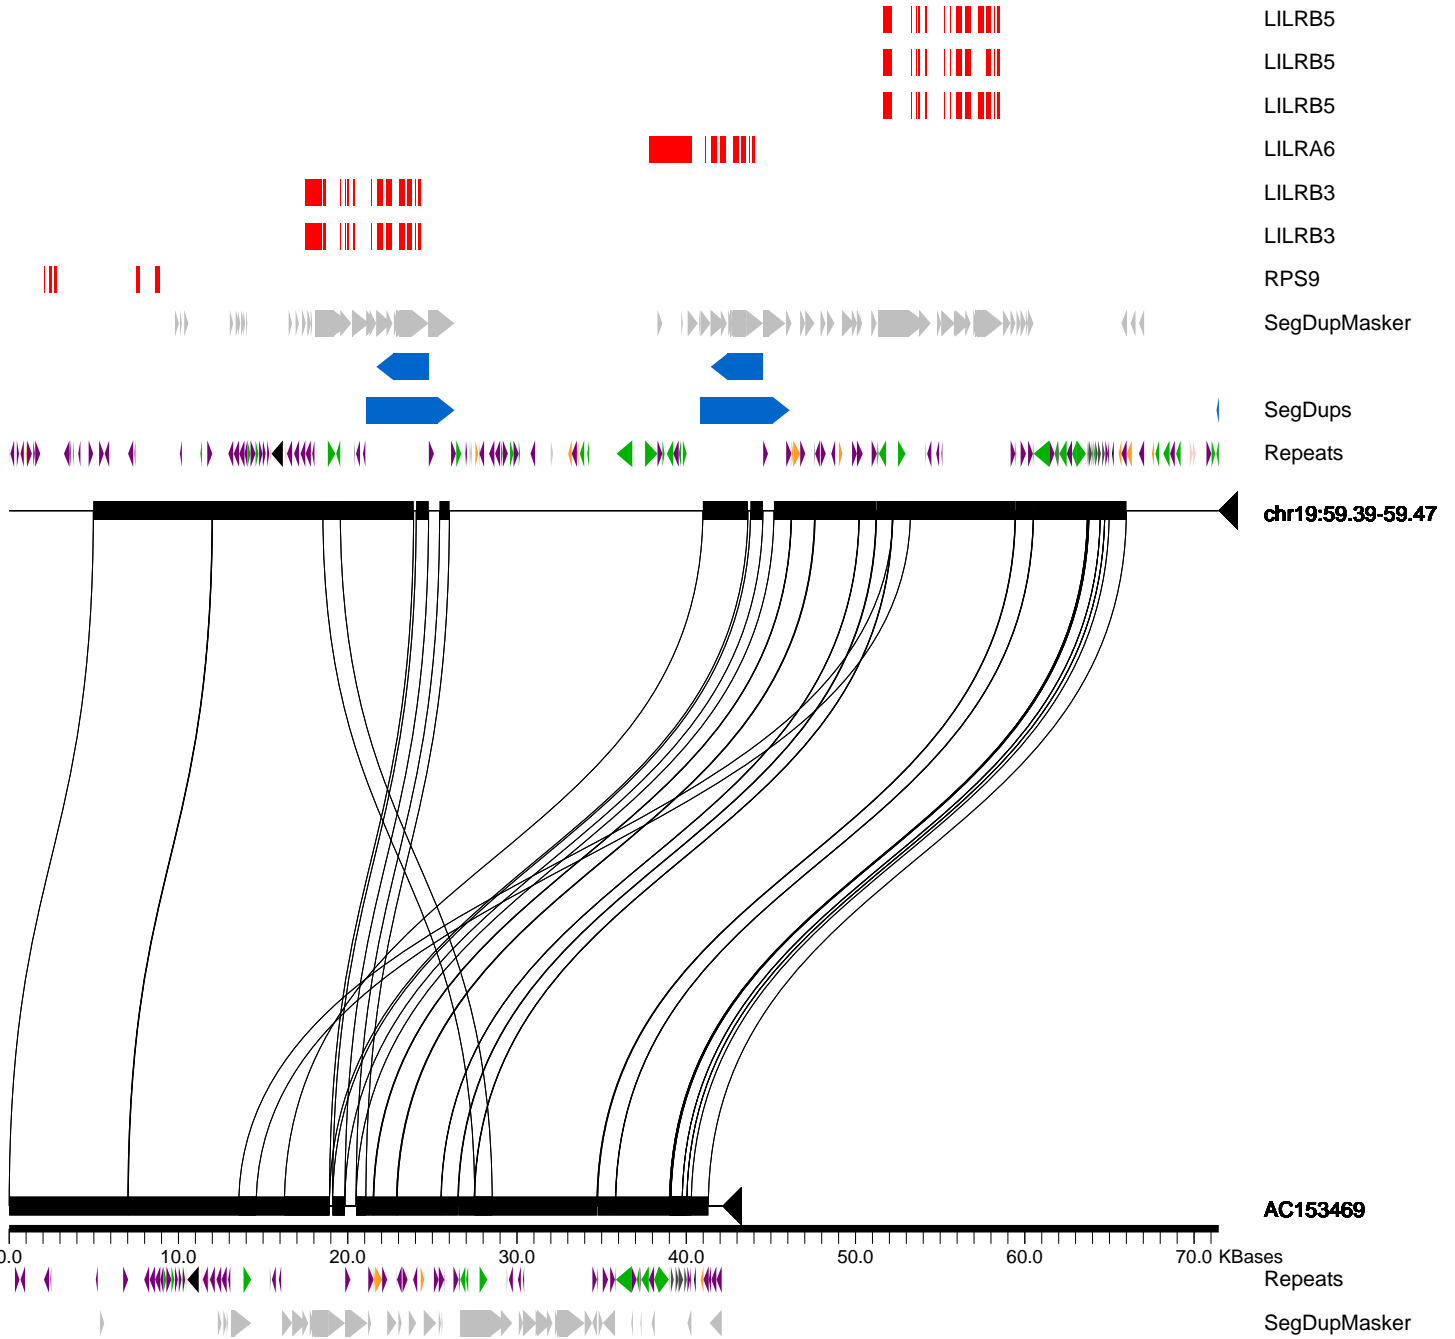

Clone: WIBR2-3058C08 Accession: AC213214

ESP Prediction: INV Validation: V Mechanism: NAHR

Other Simple Repeat Low Complexity DNA LTR LINE SINE

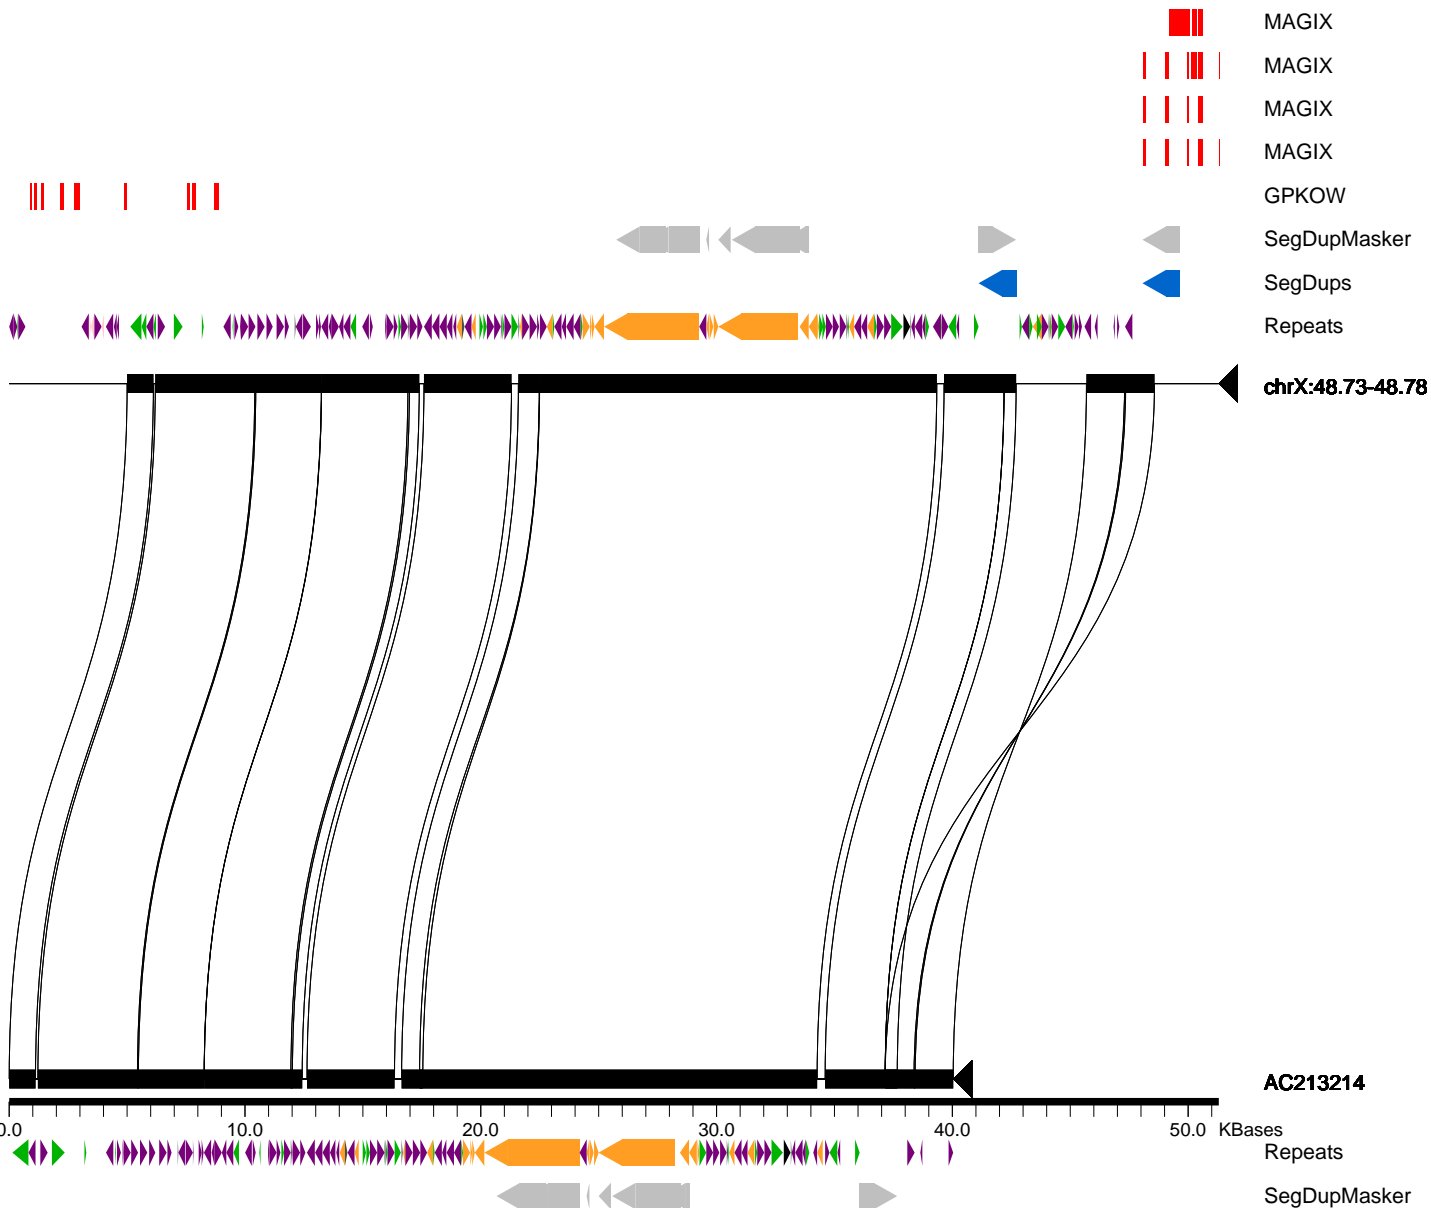

Clone: WIBR2-3186E04 Accession: AC196549

ESP Prediction: INV Validation: V Mechanism: NAHR

Other Simple Repeat Low Complexity DNA LTR LINE SINE

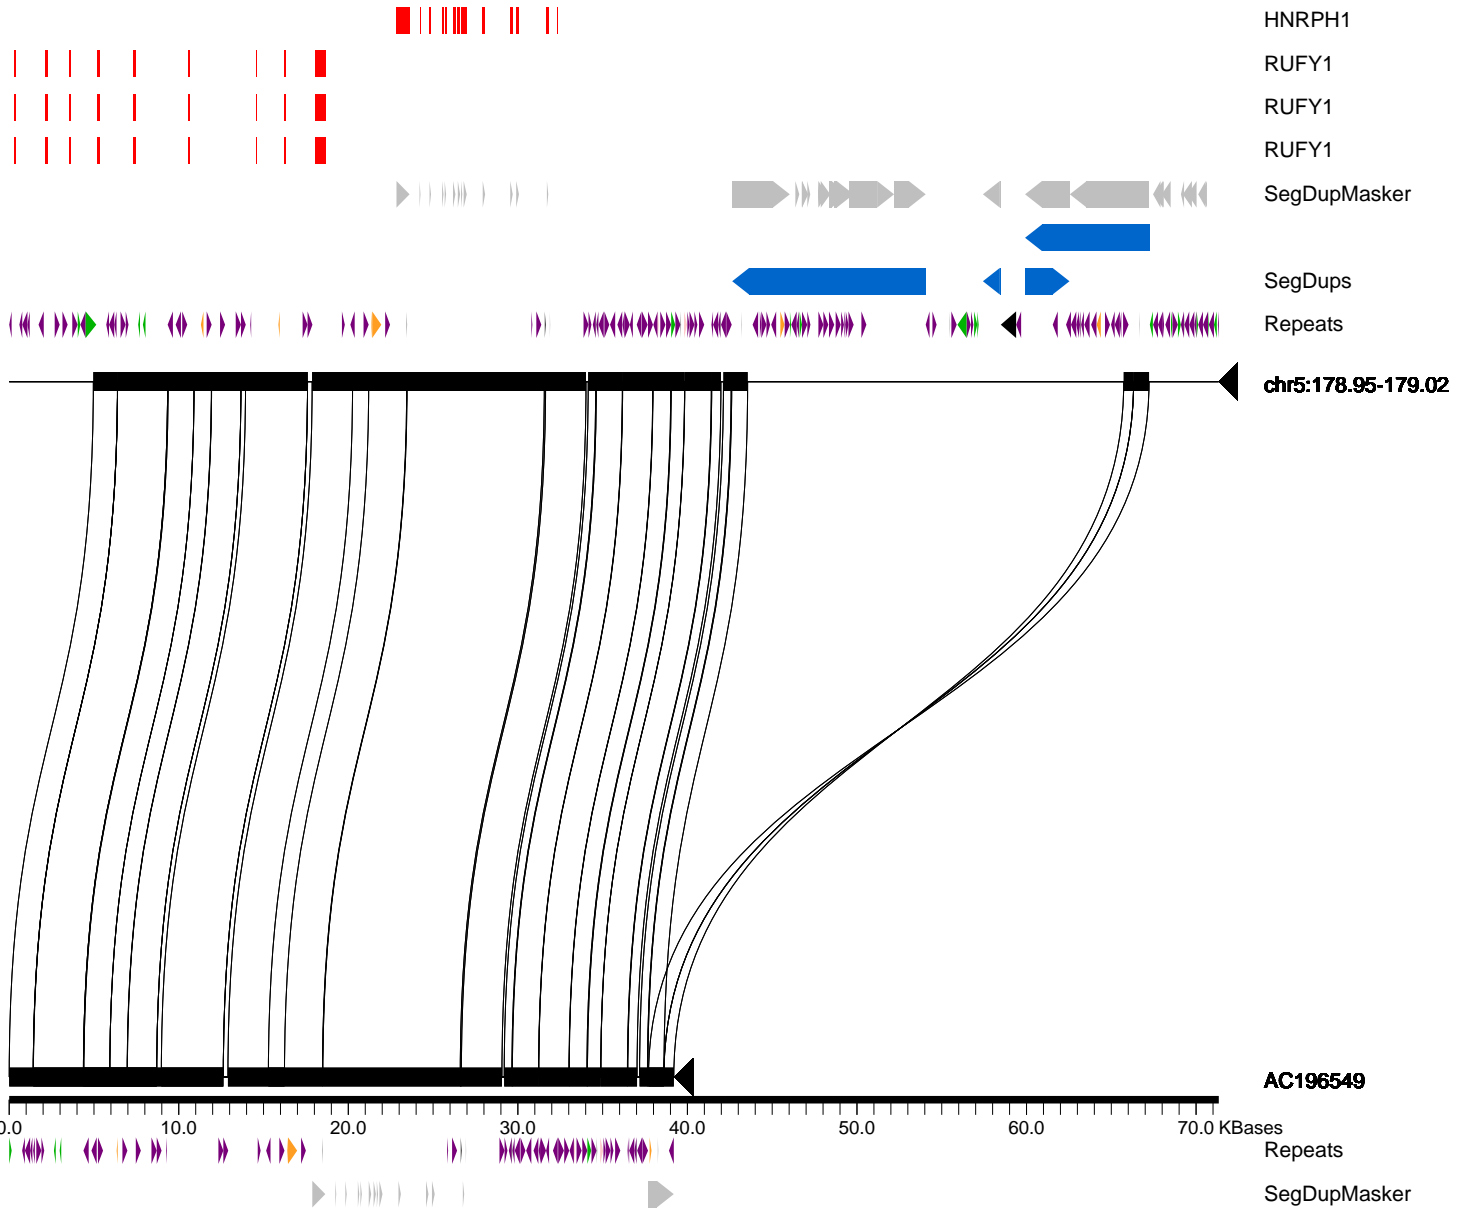

Clone: WIBR2-3187B20 Accession: AC196550

ESP Prediction: INV Validation: V Mechanism: NAHR

Other Simple Repeat Low Complexity DNA LTR LINE SINE

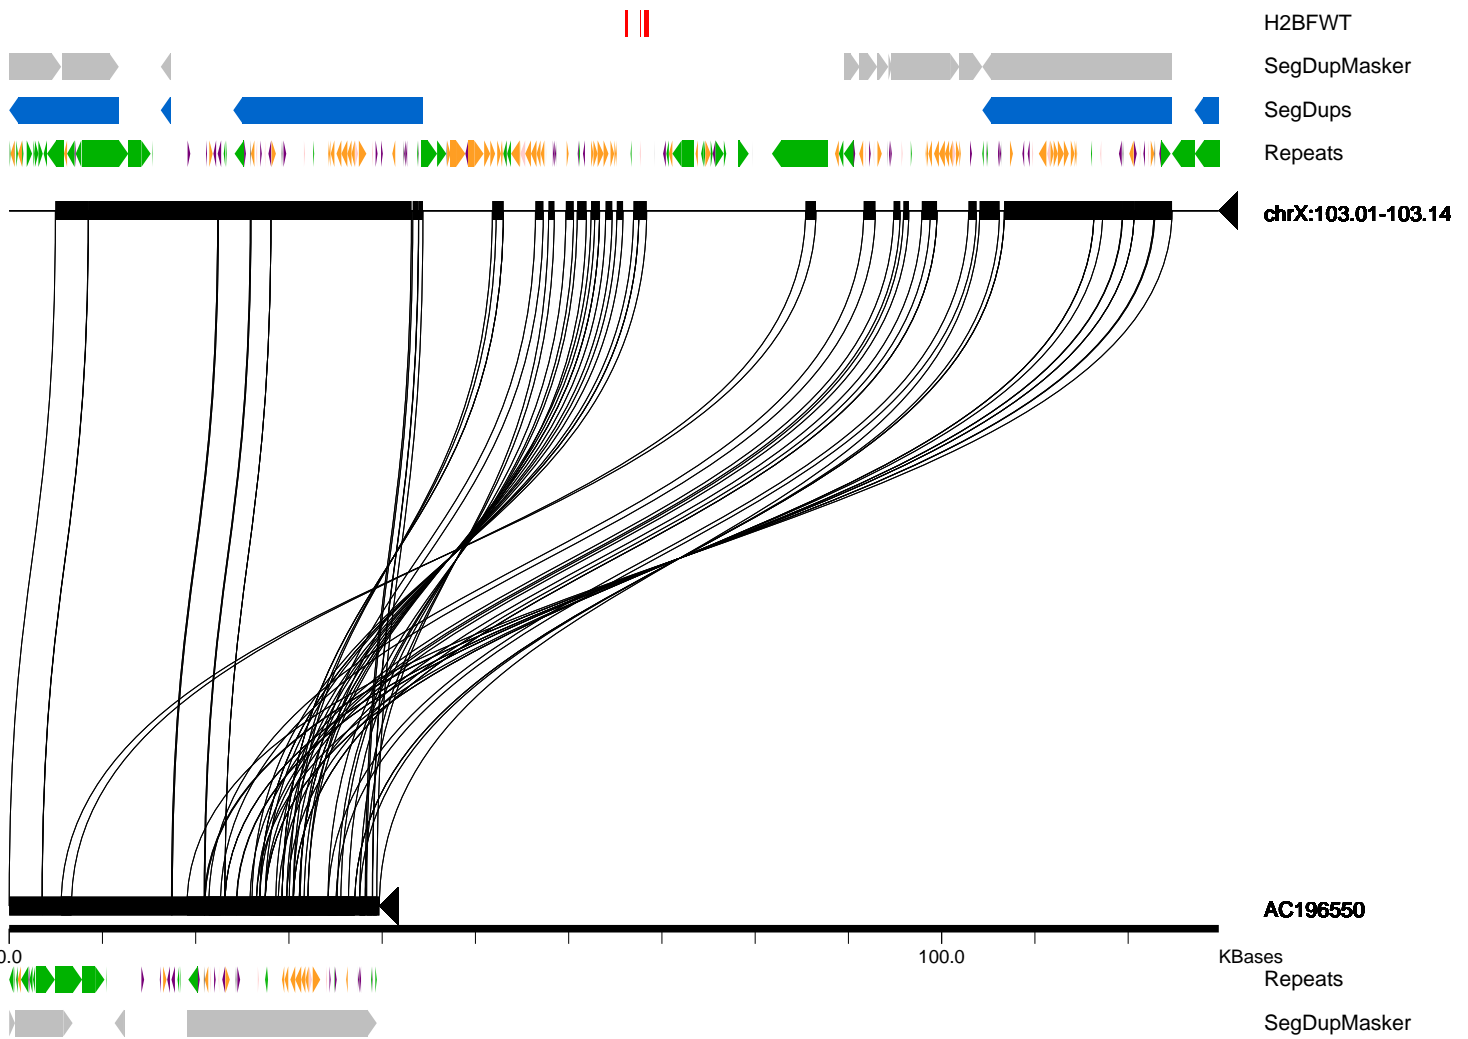



Clone: WIBR2-3678I11 Accession: AC158334

ESP Prediction: INV Validation: V Mechanism: NAHR

Other Simple Repeat Low Complexity DNA LTR LINE SINE

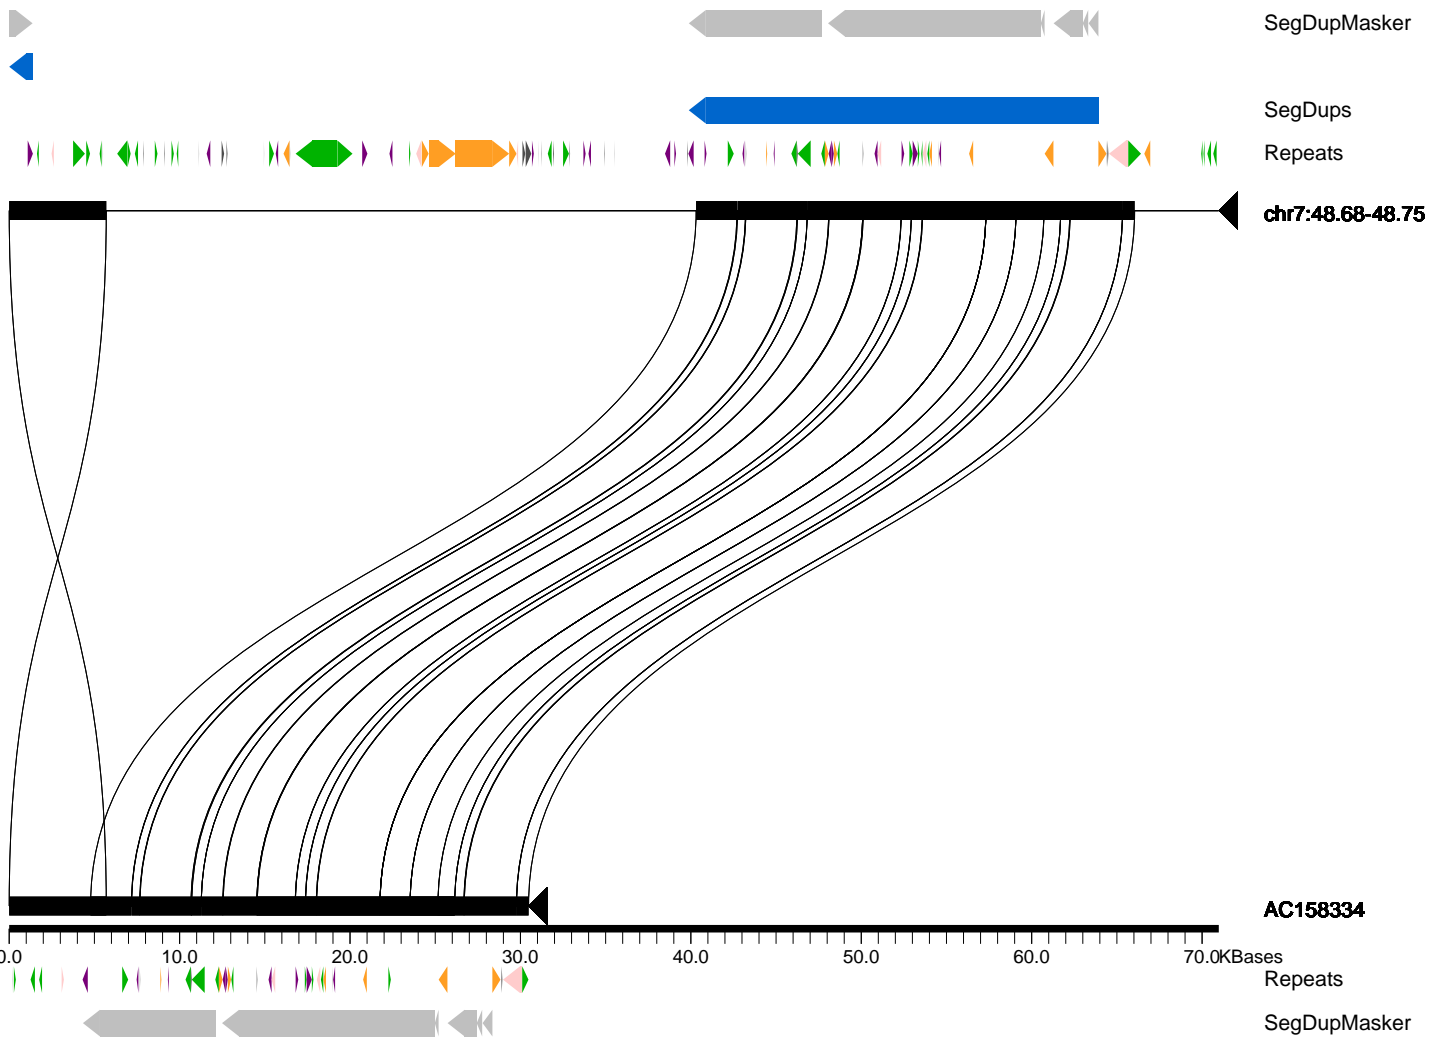

Clone: WIBR2-3457P15 Accession: AC196574

ESP Prediction: S Validation: I Mechanism: NAHR

Other Simple Repeat Low Complexity DNA LTR LINE SINE

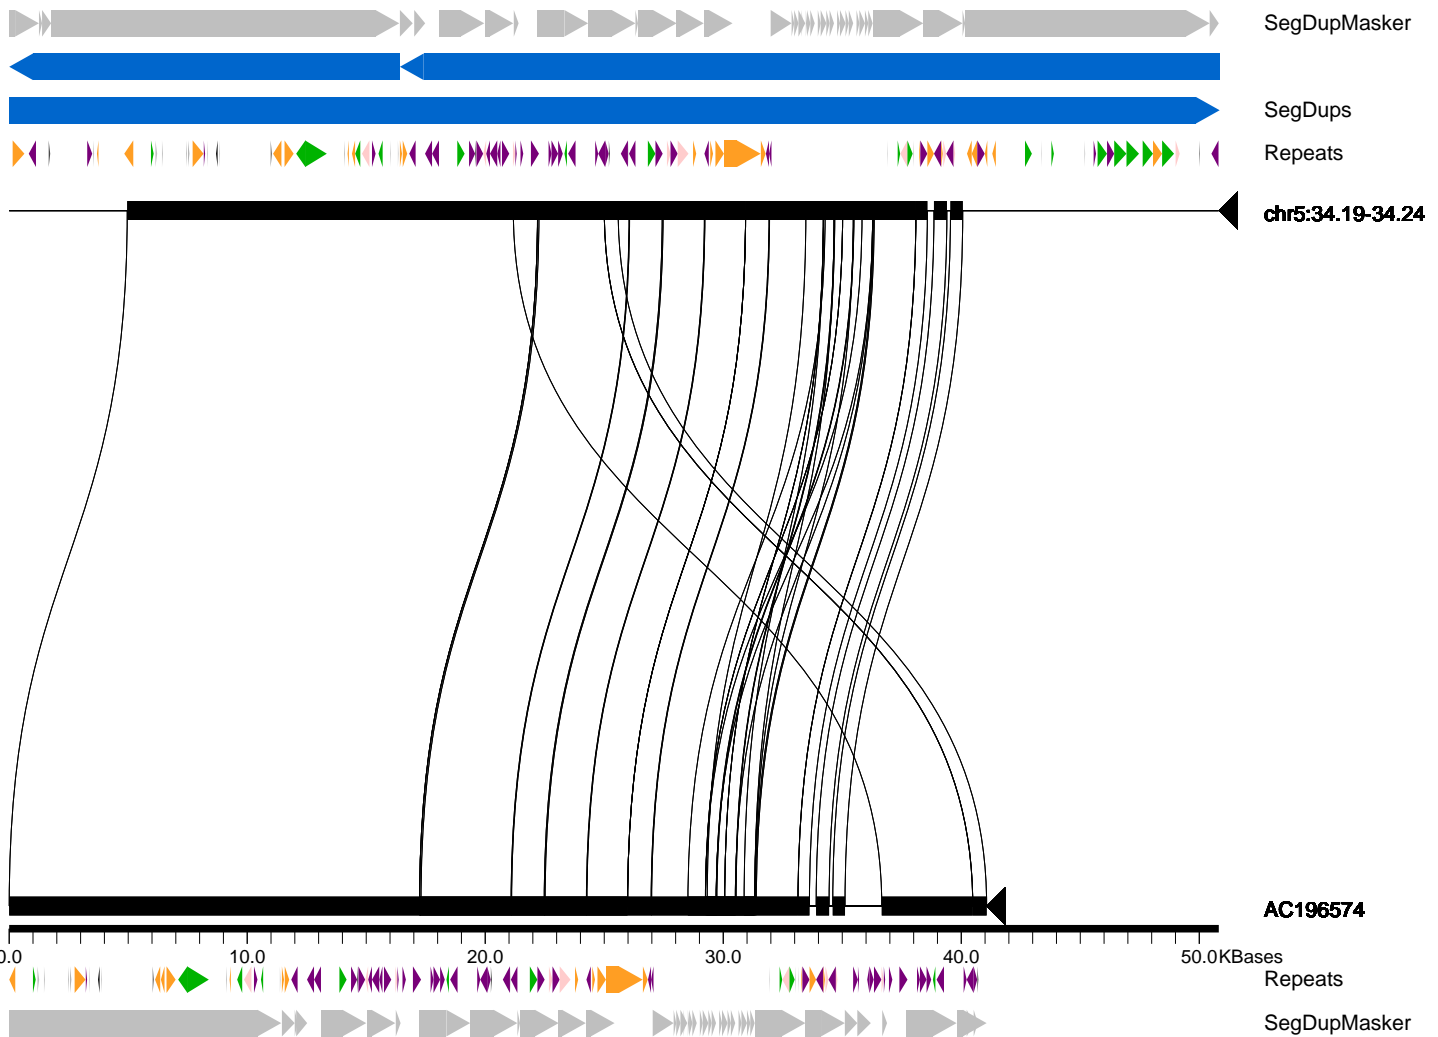

Clone: WIBR2-3494E05 Accession: AC195776

ESP Prediction: INV Validation: V Mechanism: NAHR

Other Simple Repeat Low Complexity DNA LTR LINE SINE

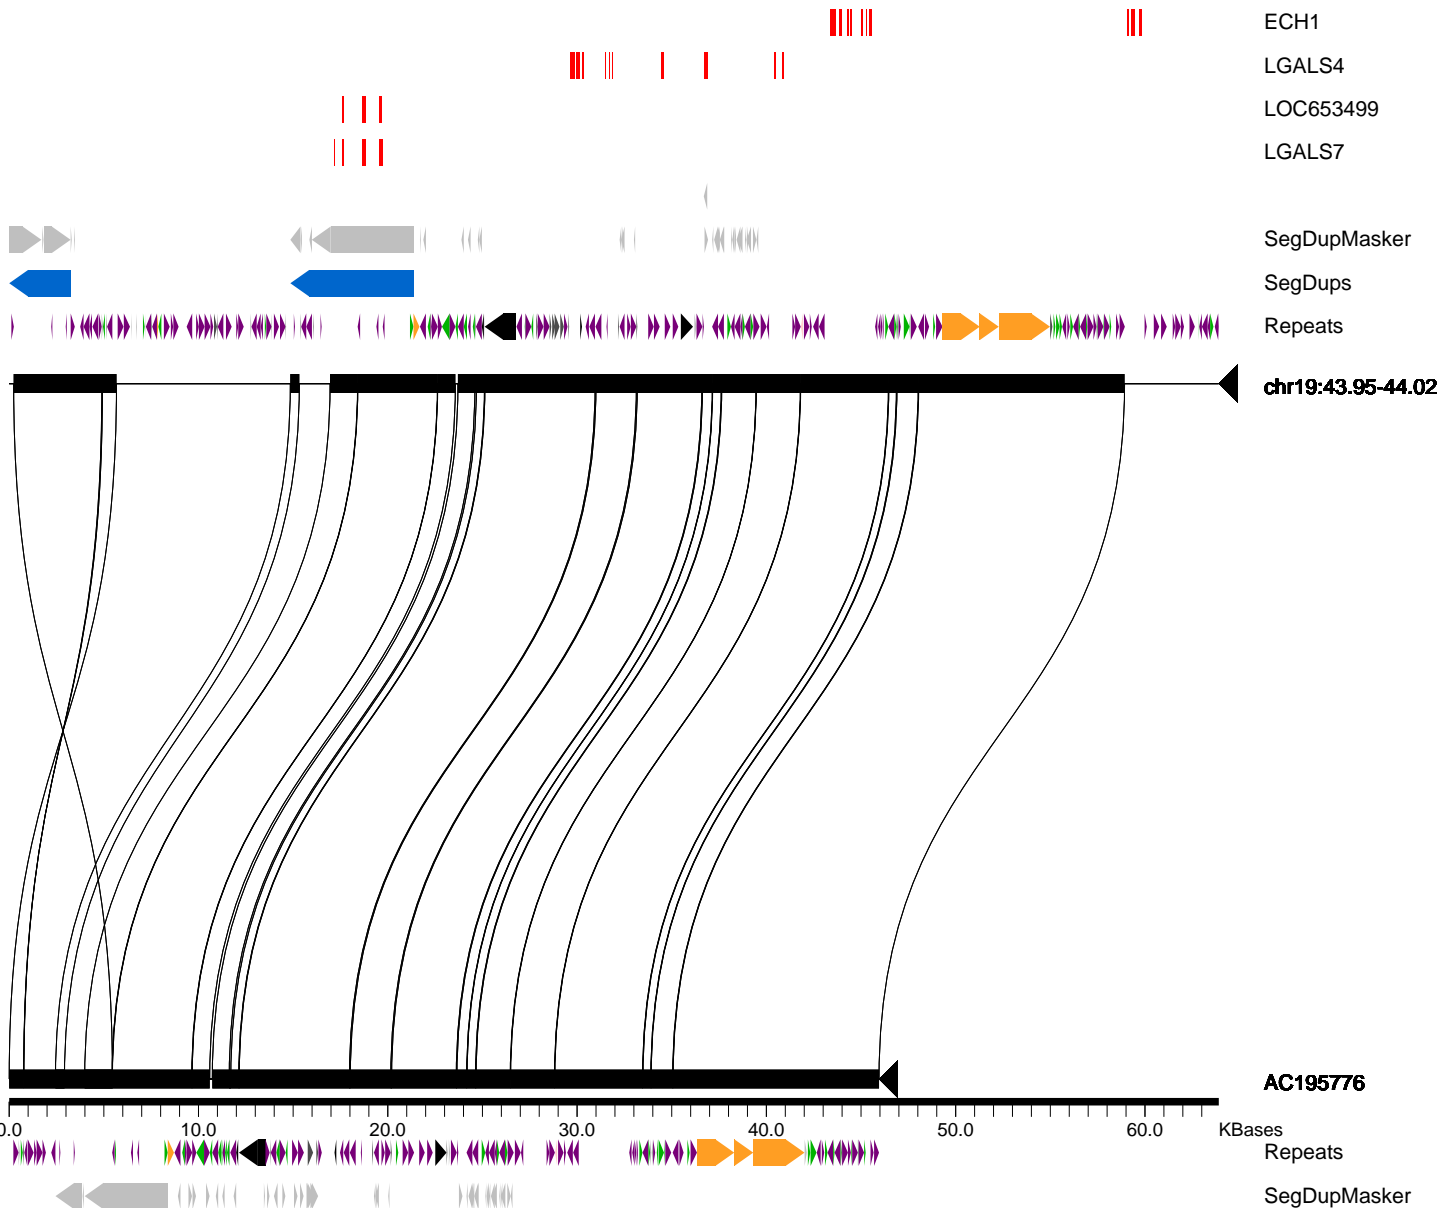

Clone: WIBR2-3412G22 Accession: AC196572

ESP Prediction: B Validation: D Mechanism: NAHR

Other Simple Repeat Low Complexity DNA LTR LINE SINE

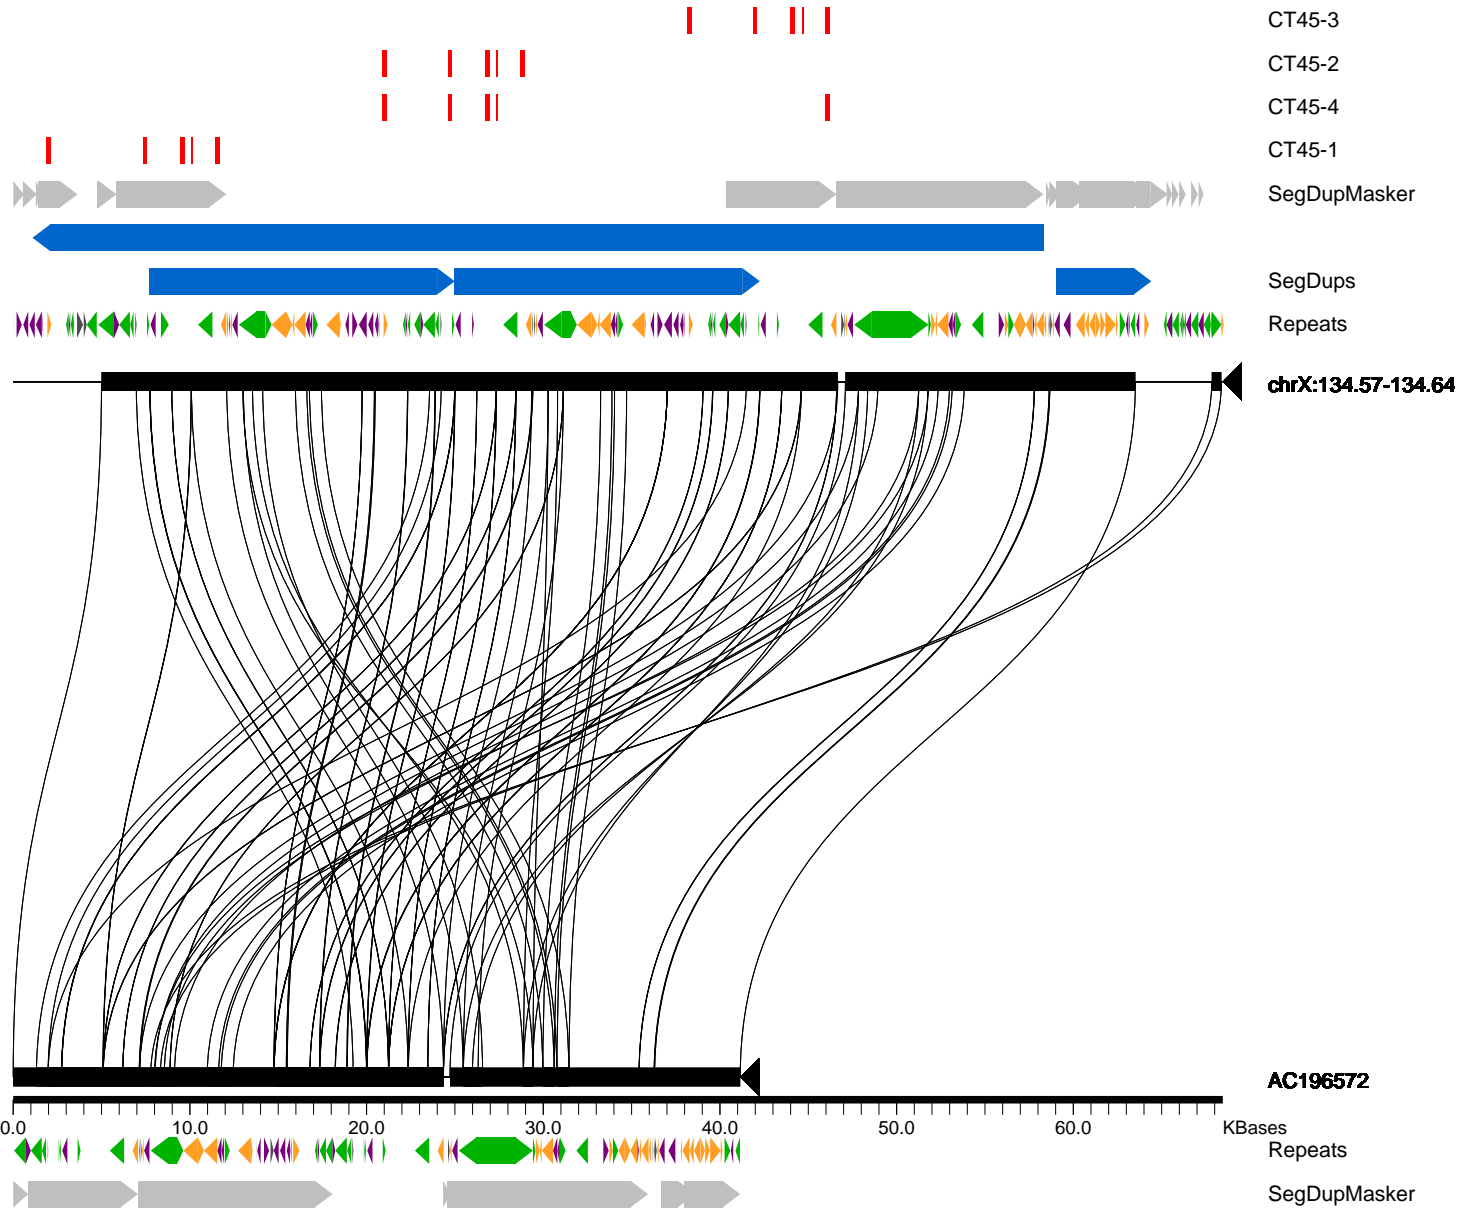

Clone: WIBR2-3802M24 Accession: AC193175

ESP Prediction: S Validation: I Mechanism: NAHR

Other Simple Repeat Low Complexity DNA LTR LINE SINE

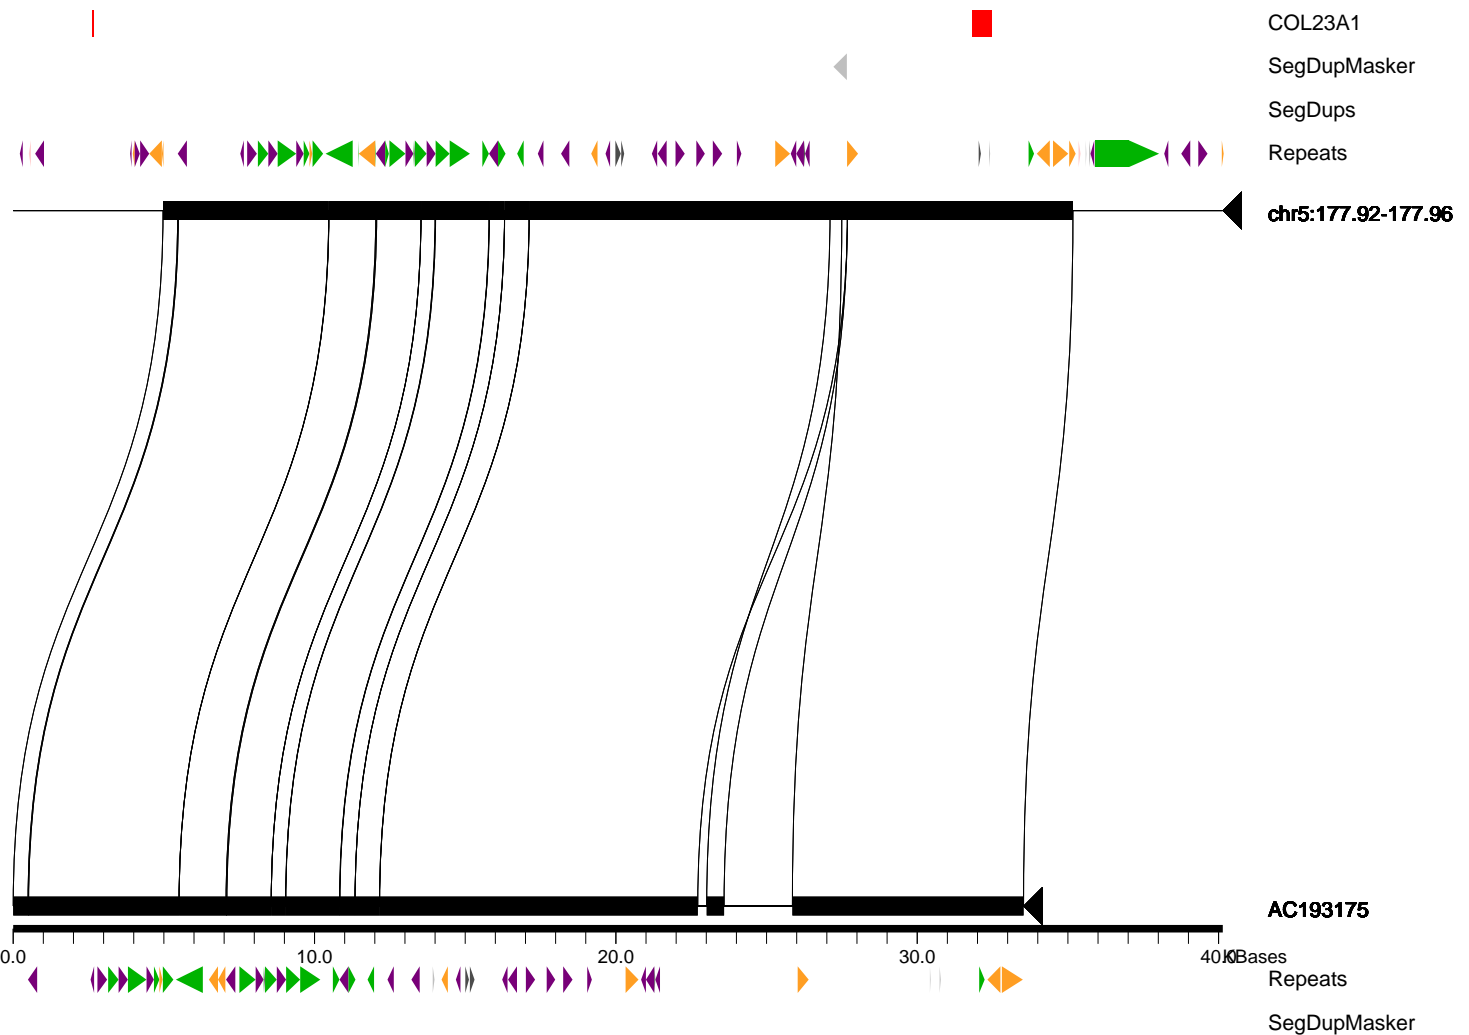

Clone: WIBR2-0875P13 Accession: AC158327

ESP Prediction: S Validation: I Mechanism: NAHR

Other Simple Repeat Low Complexity DNA LTR LINE SINE

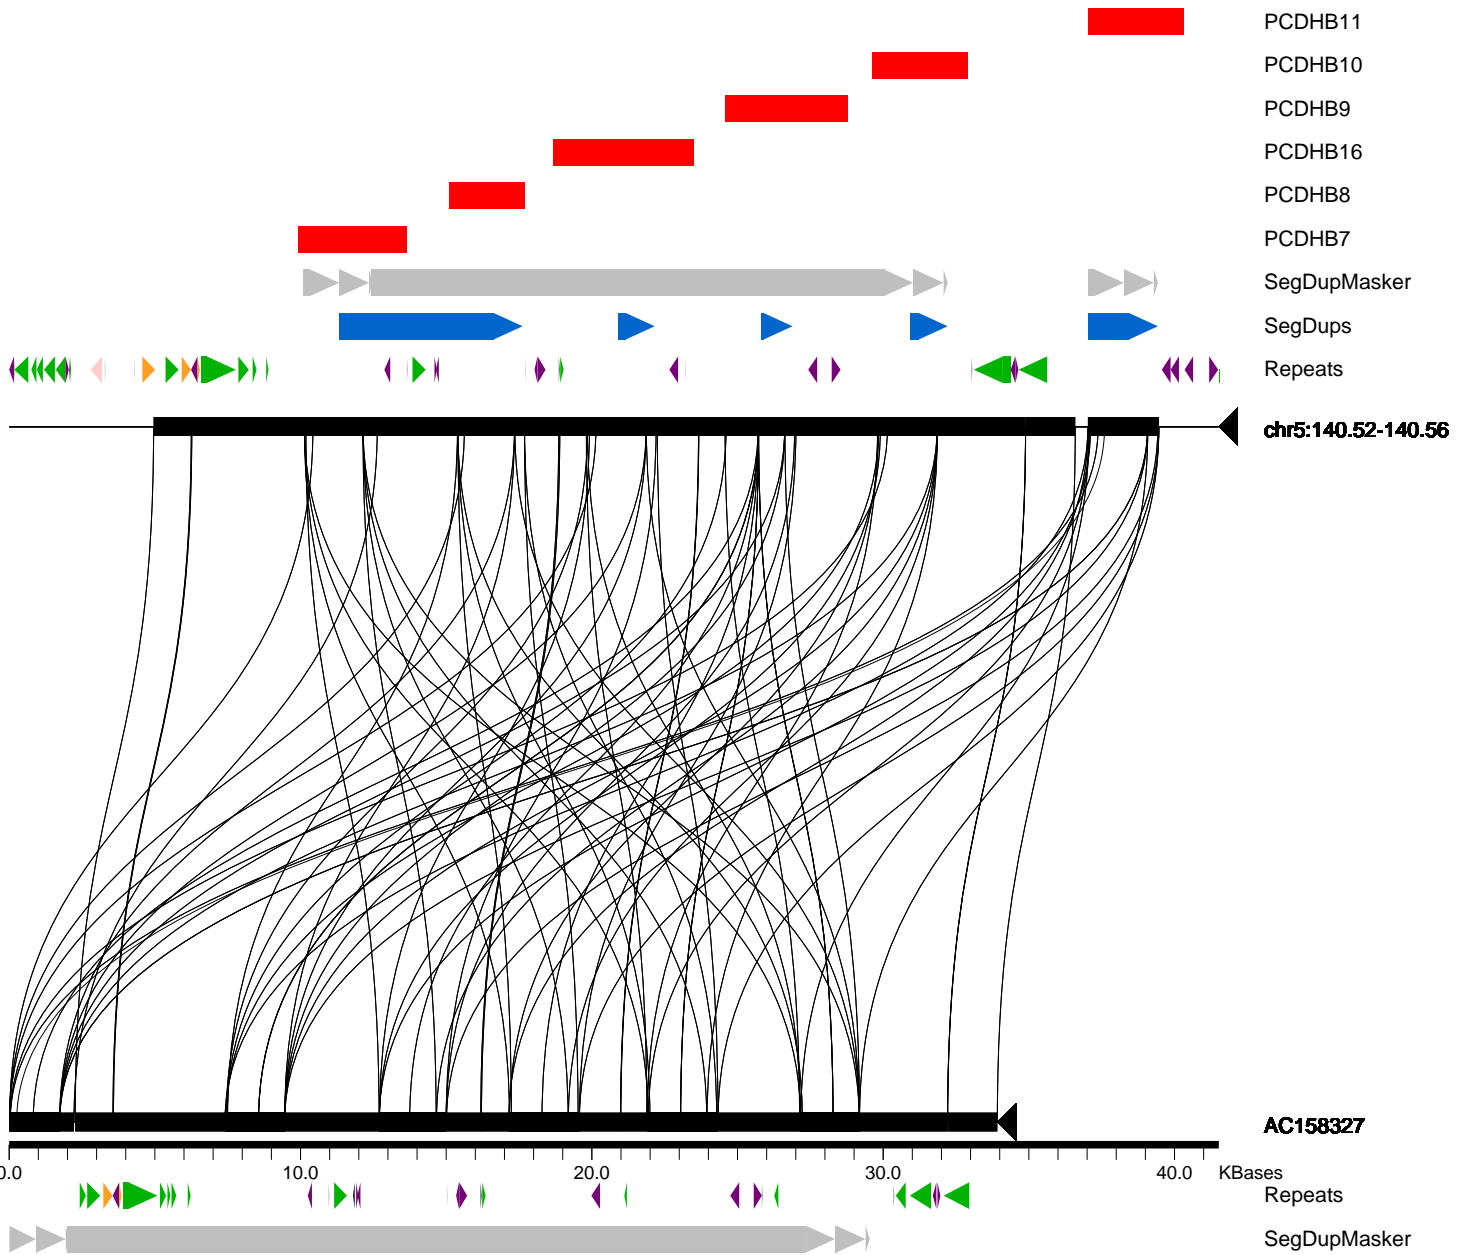

Clone: WIBR2-0875H22 Accession: AC196510

ESP Prediction: INV Validation: V Mechanism: NAHR

Other Simple Repeat Low Complexity DNA LTR LINE SINE

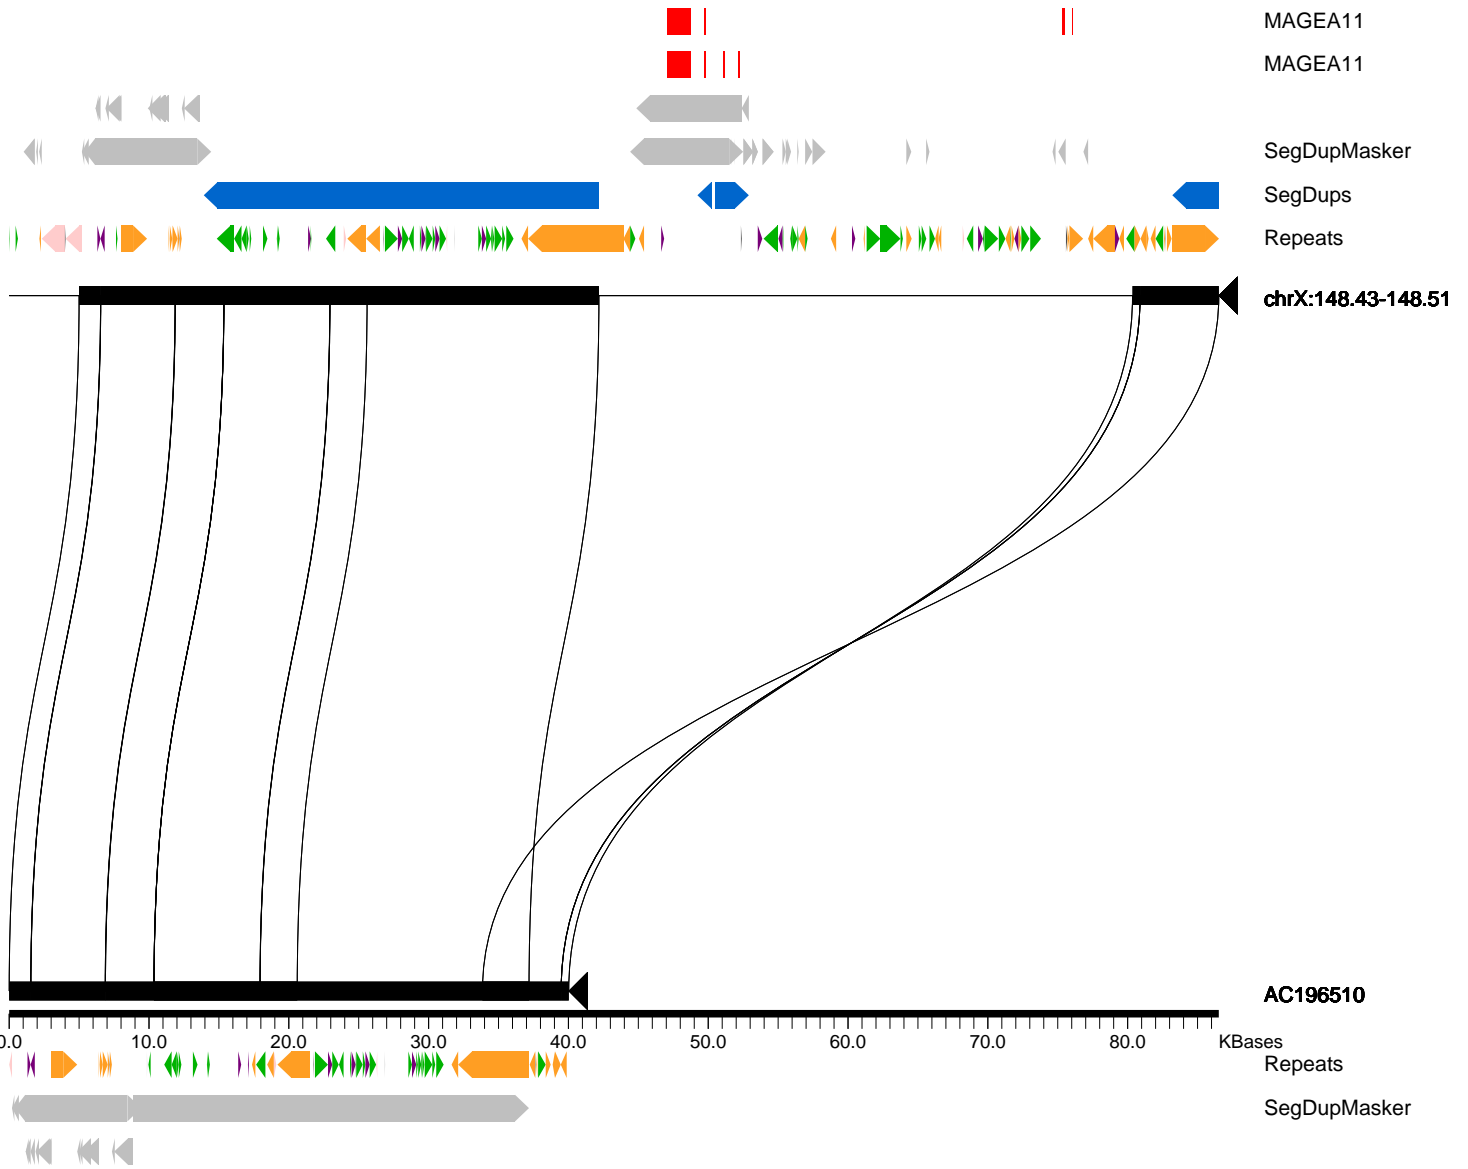

Clone: WIBR2-3739B11 Accession: AC193108

ESP Prediction: B Validation: D Mechanism: NAHR

Other Simple Repeat Low Complexity DNA LTR LINE SINE

OR51A2

OR51A4

OR51G1

OR51G2

SegDupMasker

SegDups

Repeats

chr11:4.89-4.95

AC193108

KBases

Repeats

SegDupMasker

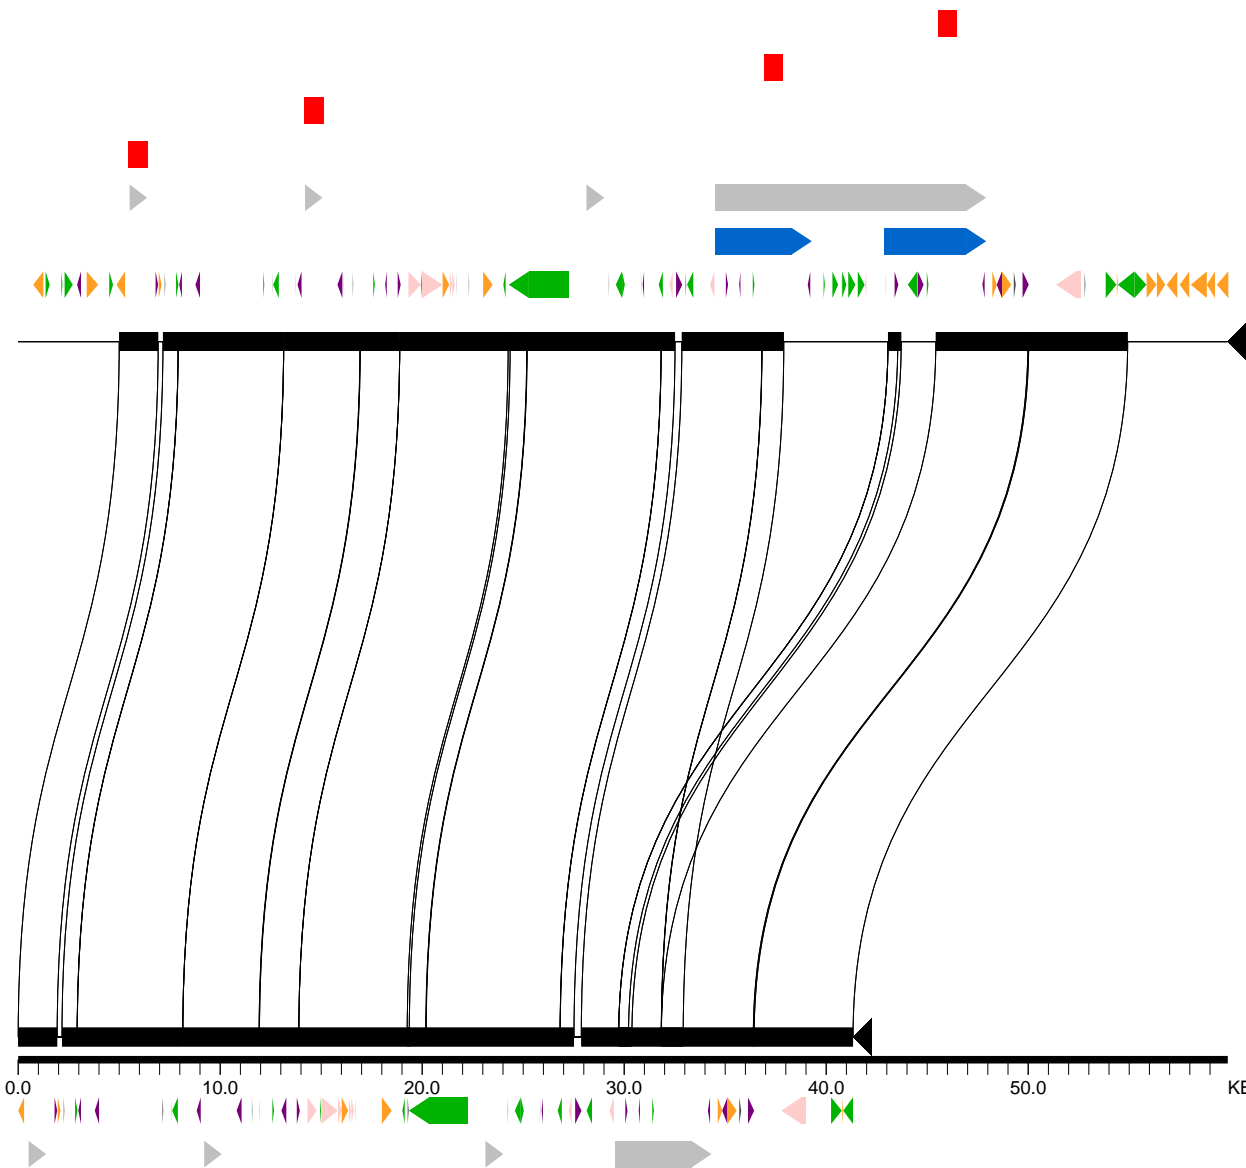



Clone: WIBR2-0676D19 Accession: AC193113

ESP Prediction: INV Validation: V Mechanism: NAHR

Other Simple Repeat Low Complexity DNA LTR LINE SINE

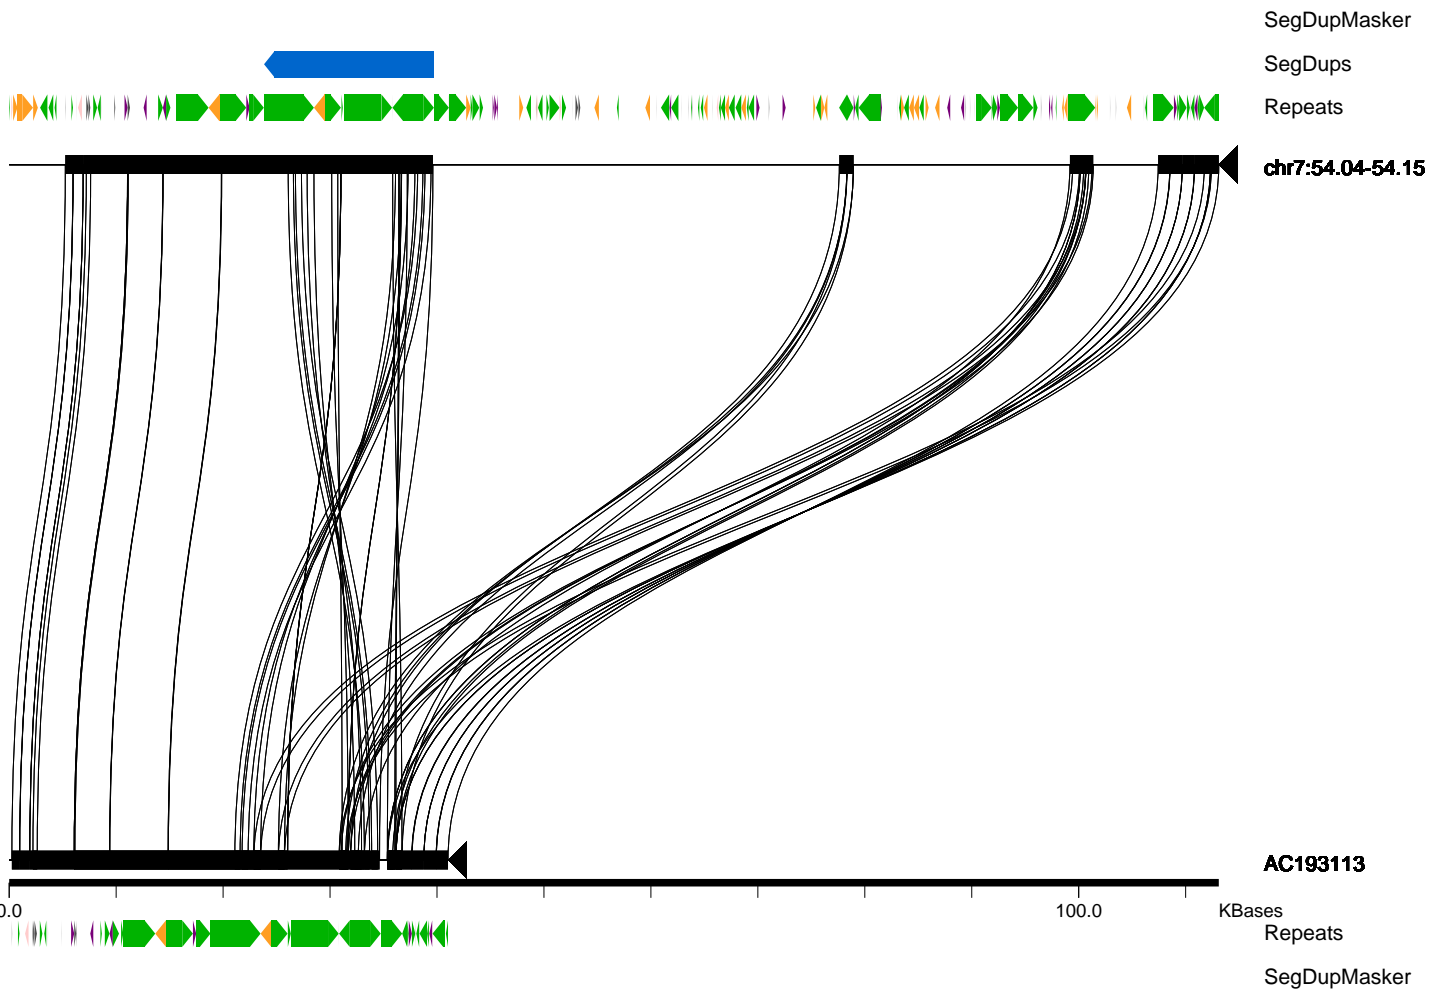

Clone: WIBR2-3413A09 Accession: AC158337

ESP Prediction: S Validation: II Mechanism: NAHR

Other Simple Repeat Low Complexity DNA LTR LINE SINE

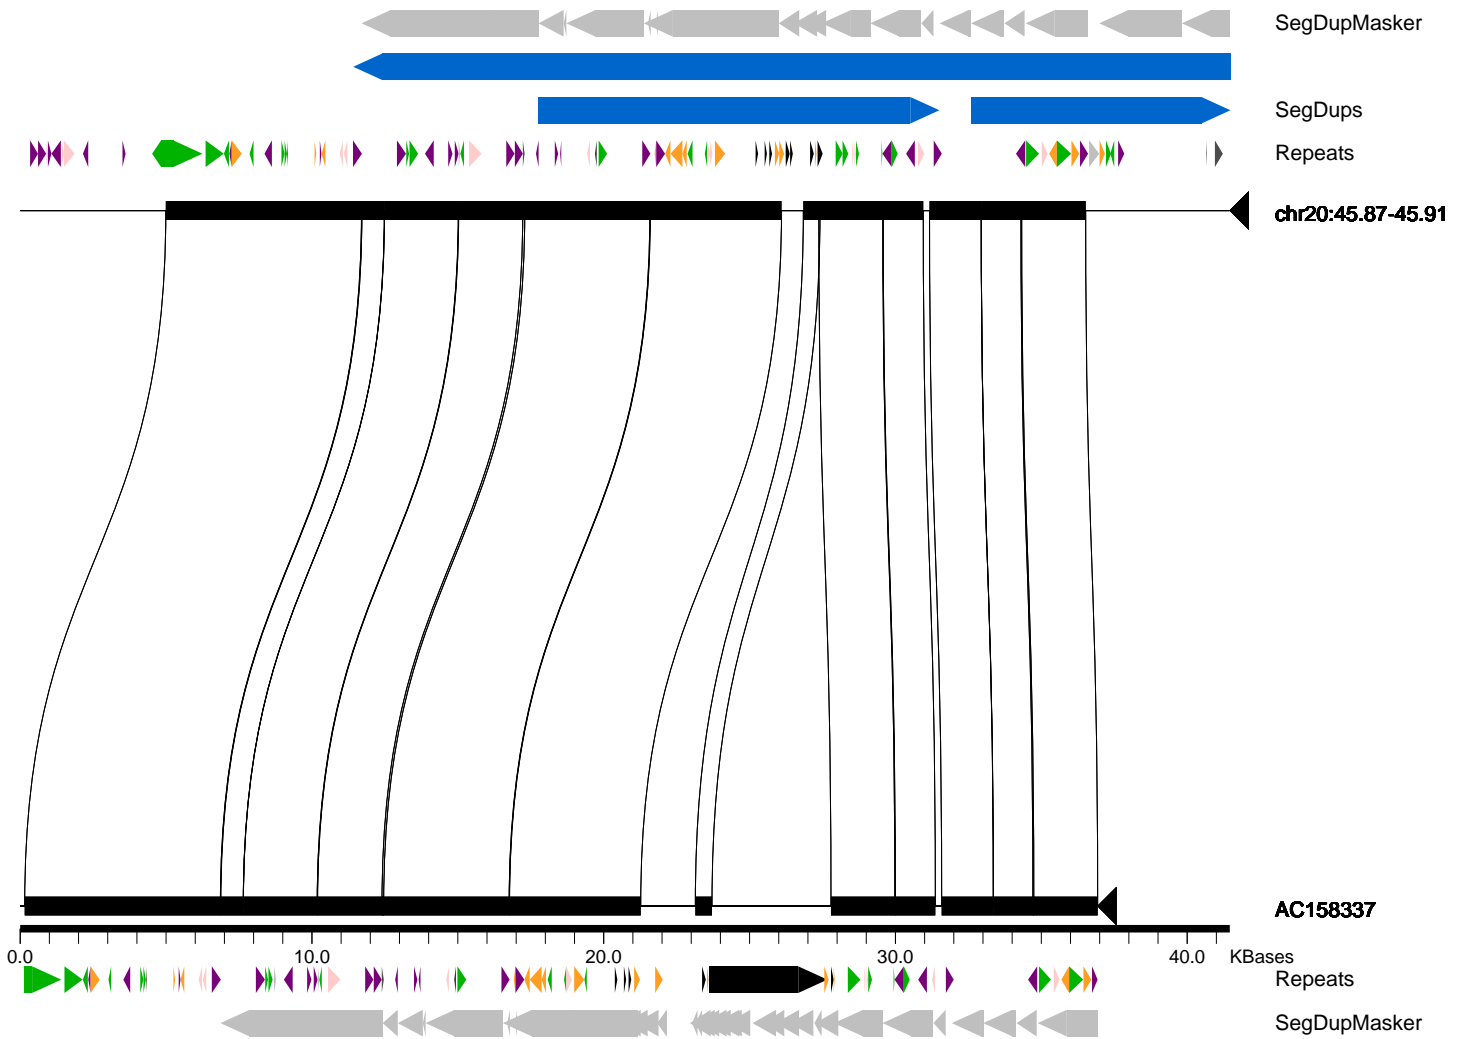

Clone: WIBR2-3777M04 Accession: AC158335

ESP Prediction: B Validation: D Mechanism: NAHR

Other Simple Repeat Low Complexity DNA LTR LINE SINE

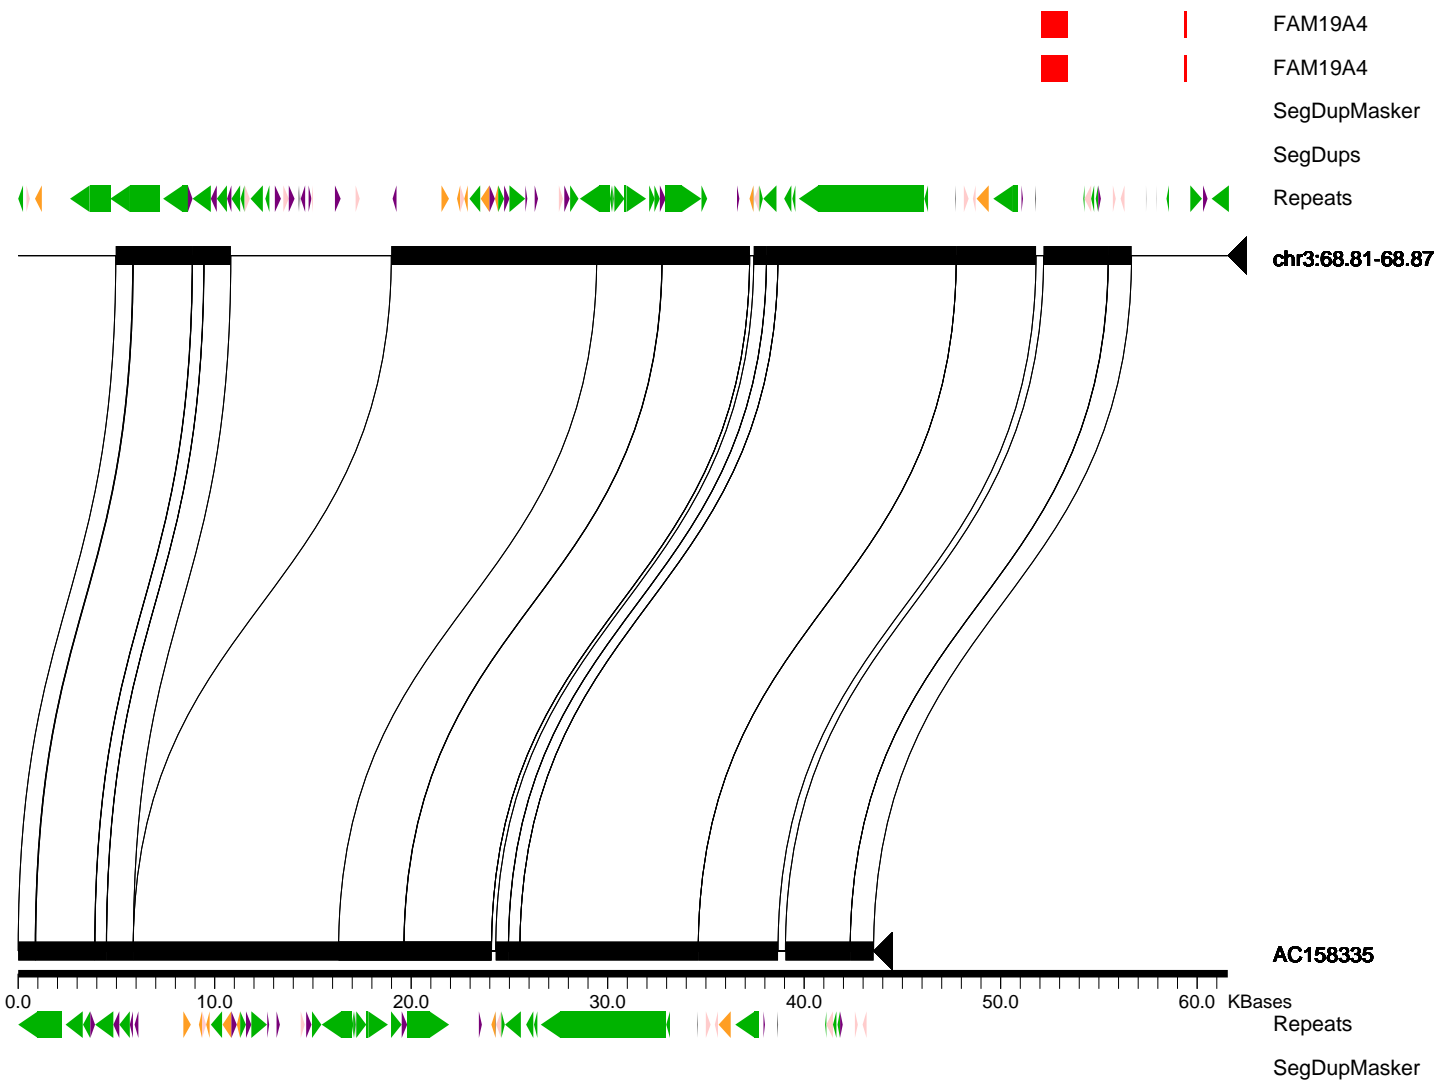

Clone: WIBR2-0913J16 Accession: AC196511

ESP Prediction: B Validation: D Mechanism: NAHR

Other Simple Repeat Low Complexity DNA LTR LINE SINE

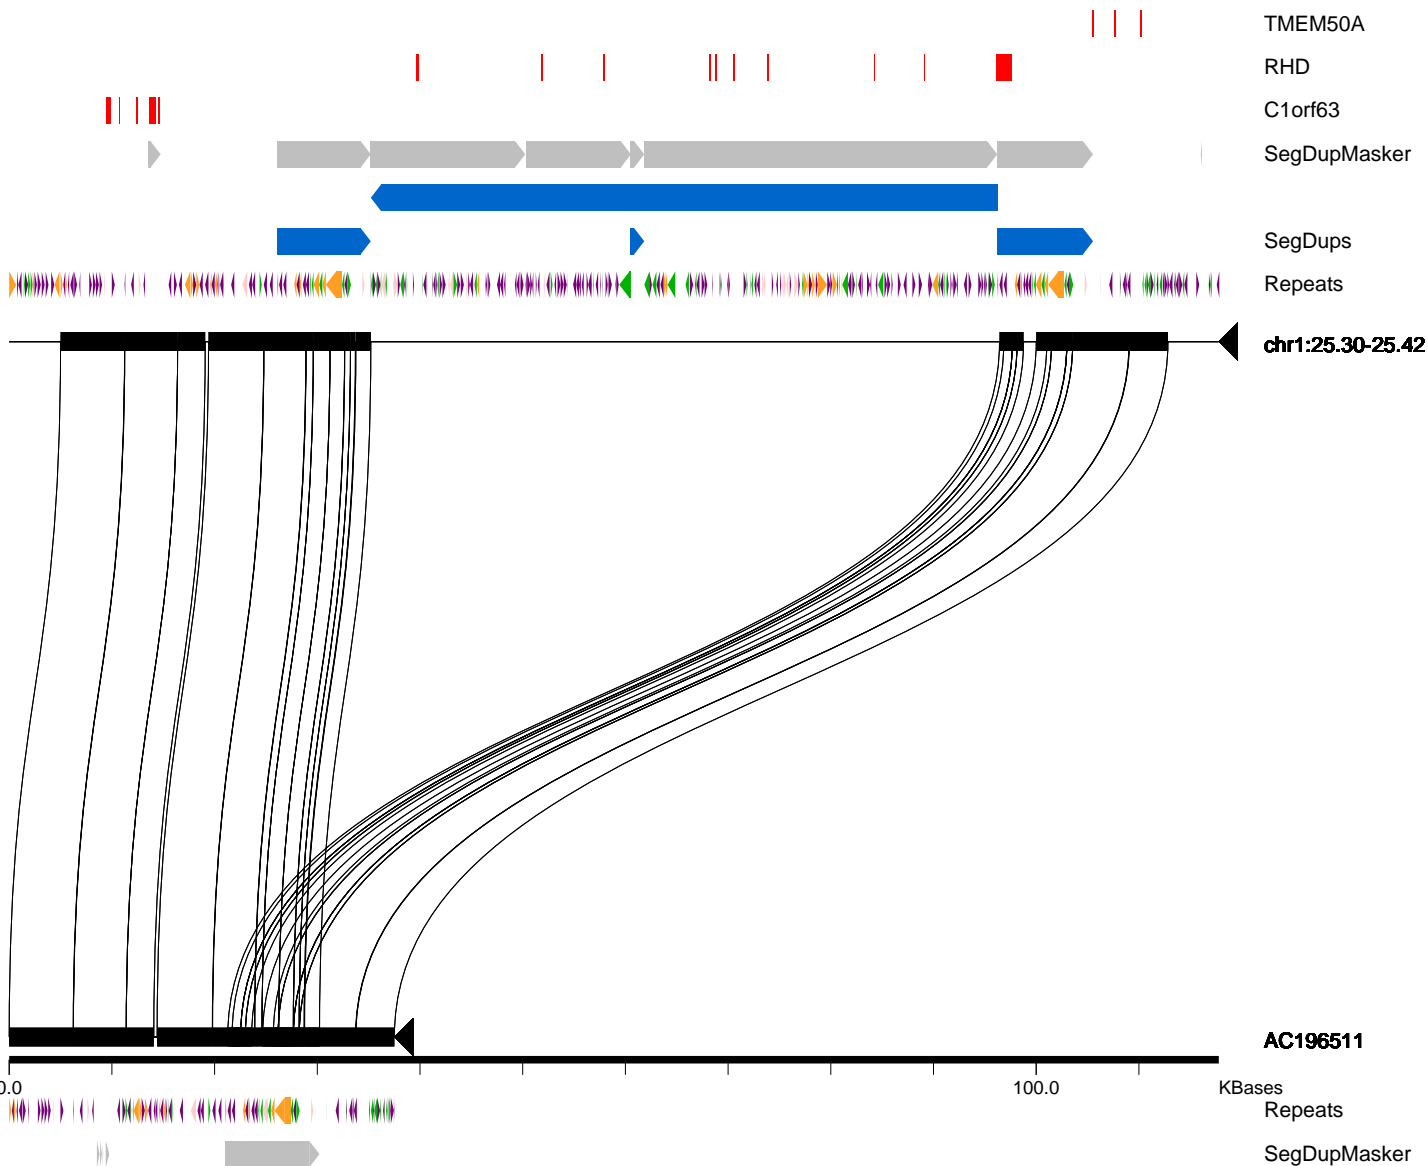

Clone: WIBR2-0629A22 Accession: AC158318

ESP Prediction: B Validation: D Mechanism: NAHR

Other Simple Repeat Low Complexity DNA LTR LINE SINE

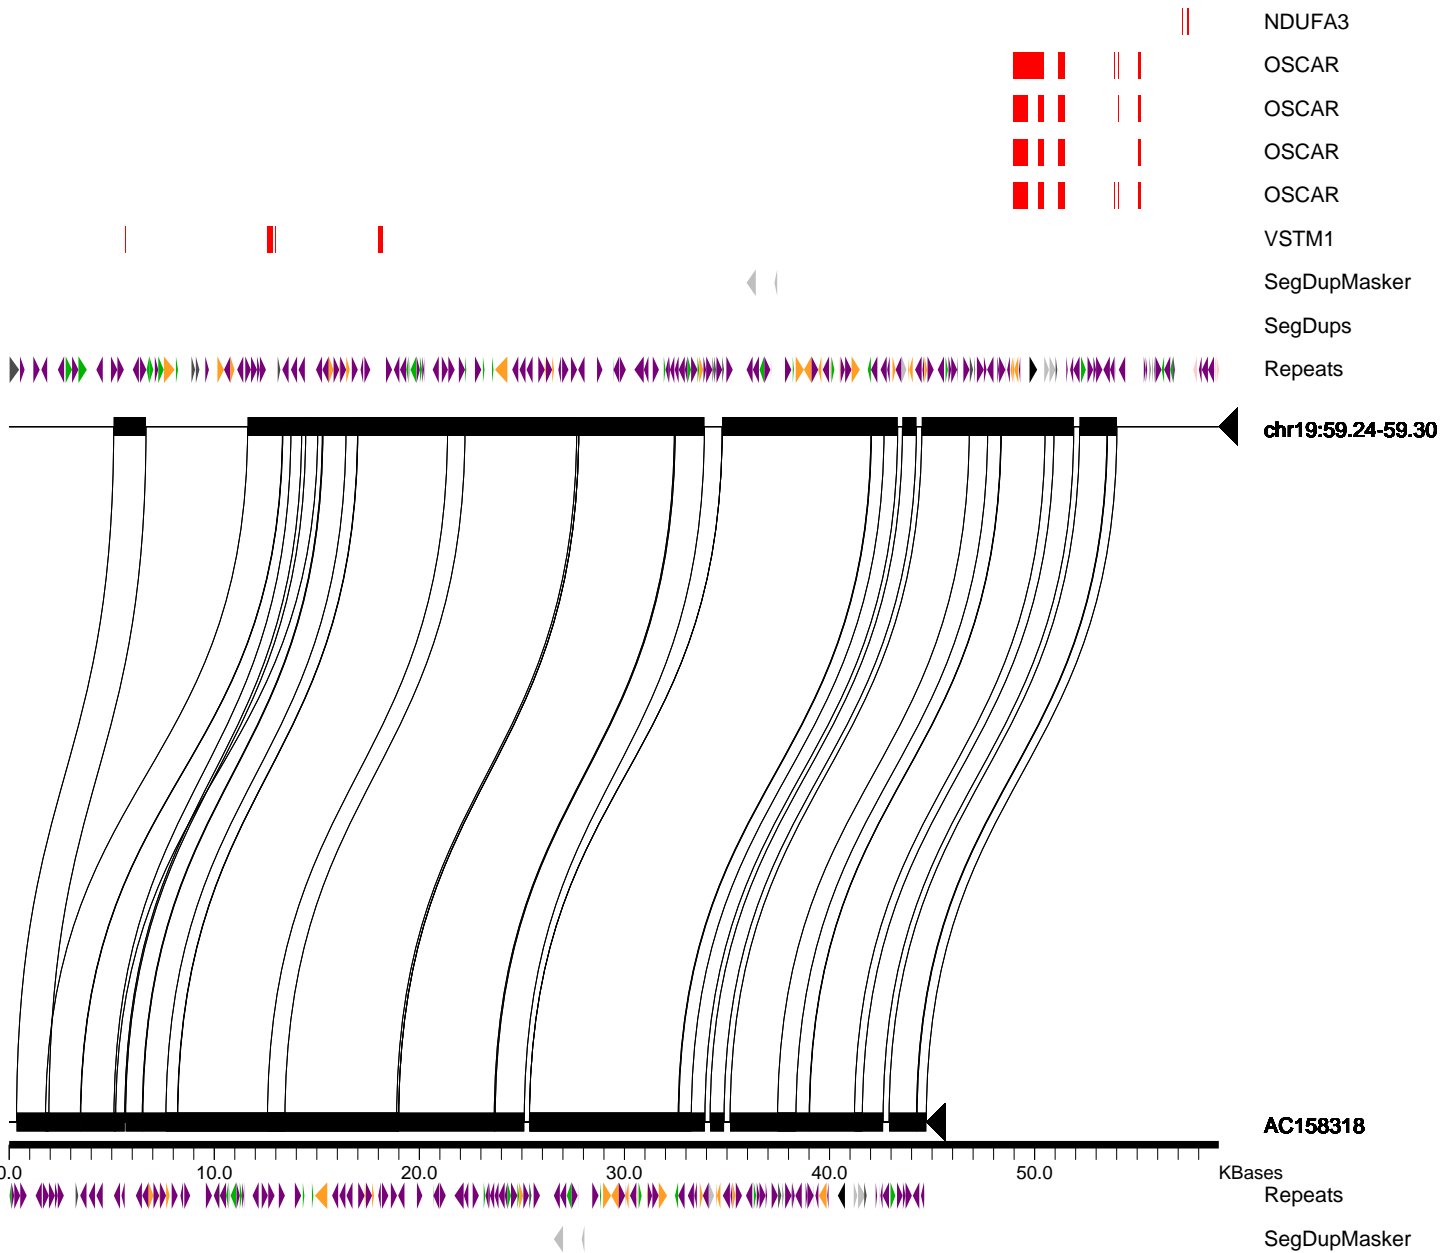

Clone: WIBR2-0655P05 Accession: AC195755

ESP Prediction: INV Validation: V Mechanism: NAHR

Other Simple Repeat Low Complexity DNA LTR LINE SINE

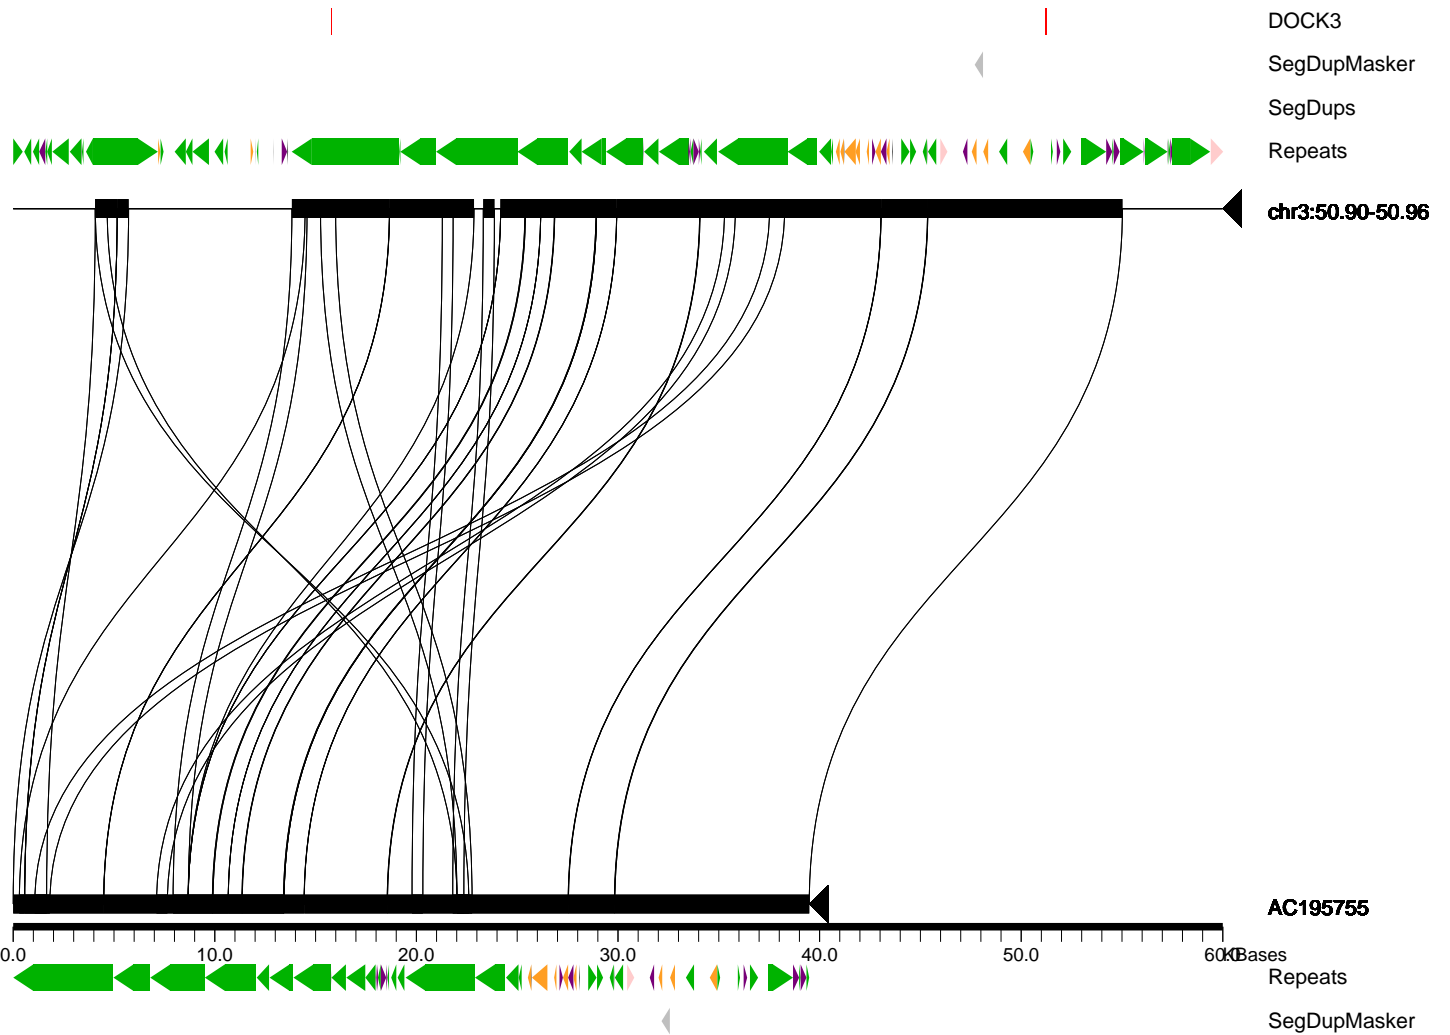

Clone: WIBR2-3163K22 Accession: AC193161

ESP Prediction: INV Validation: V Mechanism: NAHR

Other Simple Repeat Low Complexity DNA LTR LINE SINE

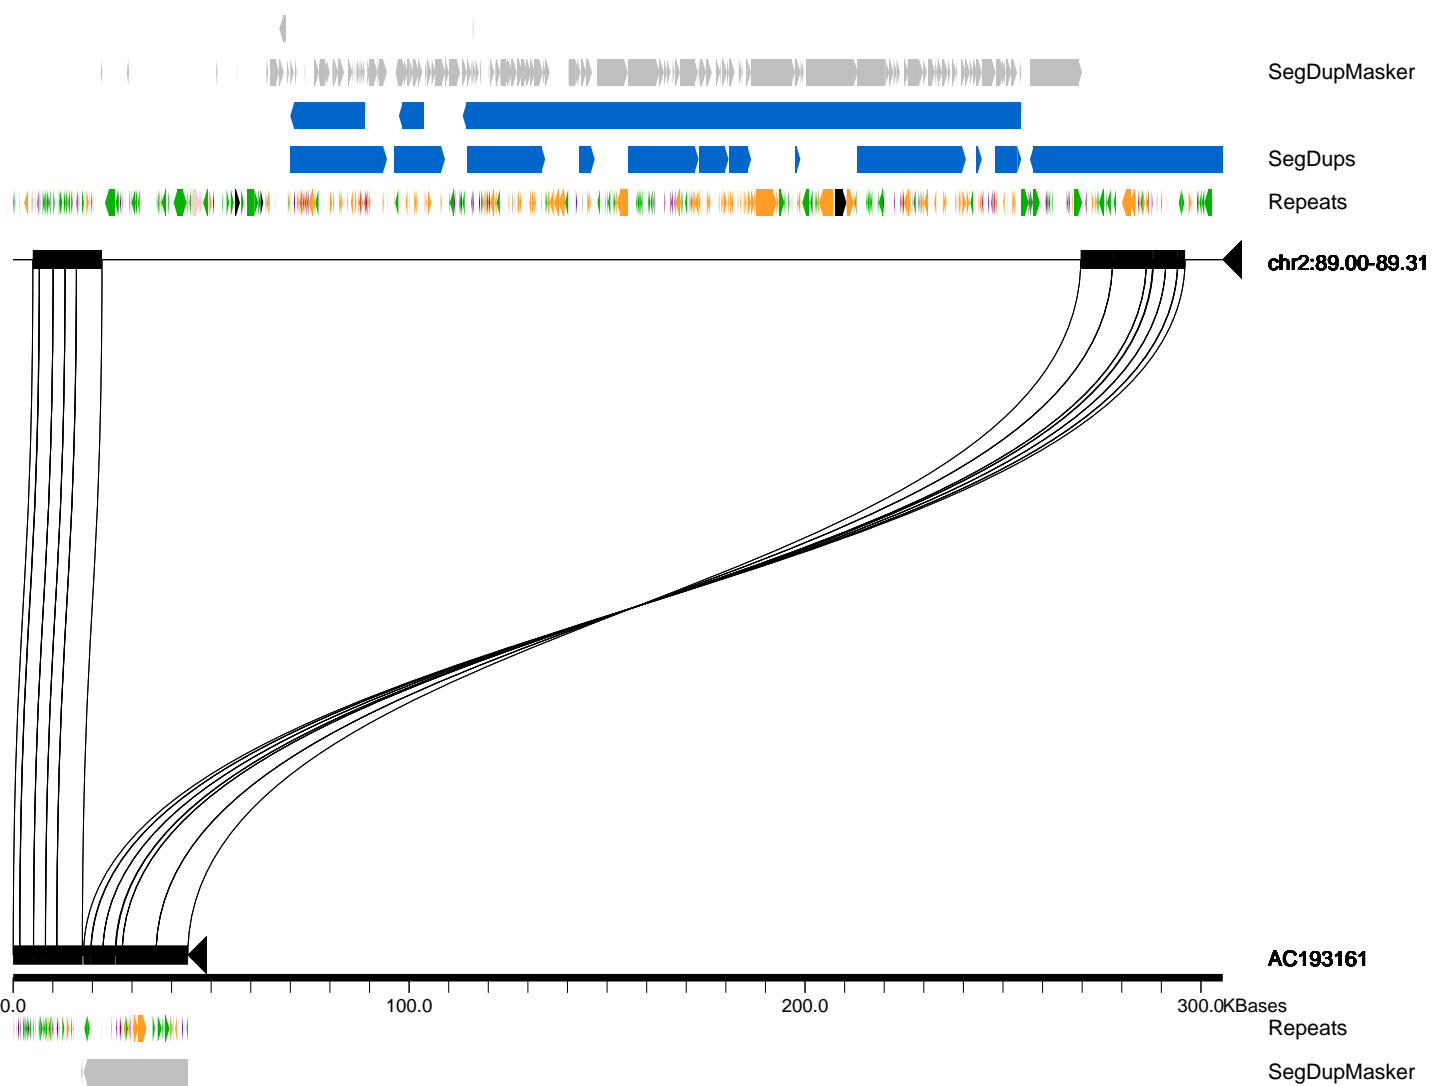

Clone: WIBR2-0768L03 Accession: AC193114

ESP Prediction: INV Validation: VII Mechanism: NAHR

Other Simple Repeat Low Complexity DNA LTR LINE SINE

■ SNX6

■ SNX6

EAPP

SegDupMasker

SegDups

Repeats

chr14:34.04-34.10

AC193114

Repeats

SegDupMasker

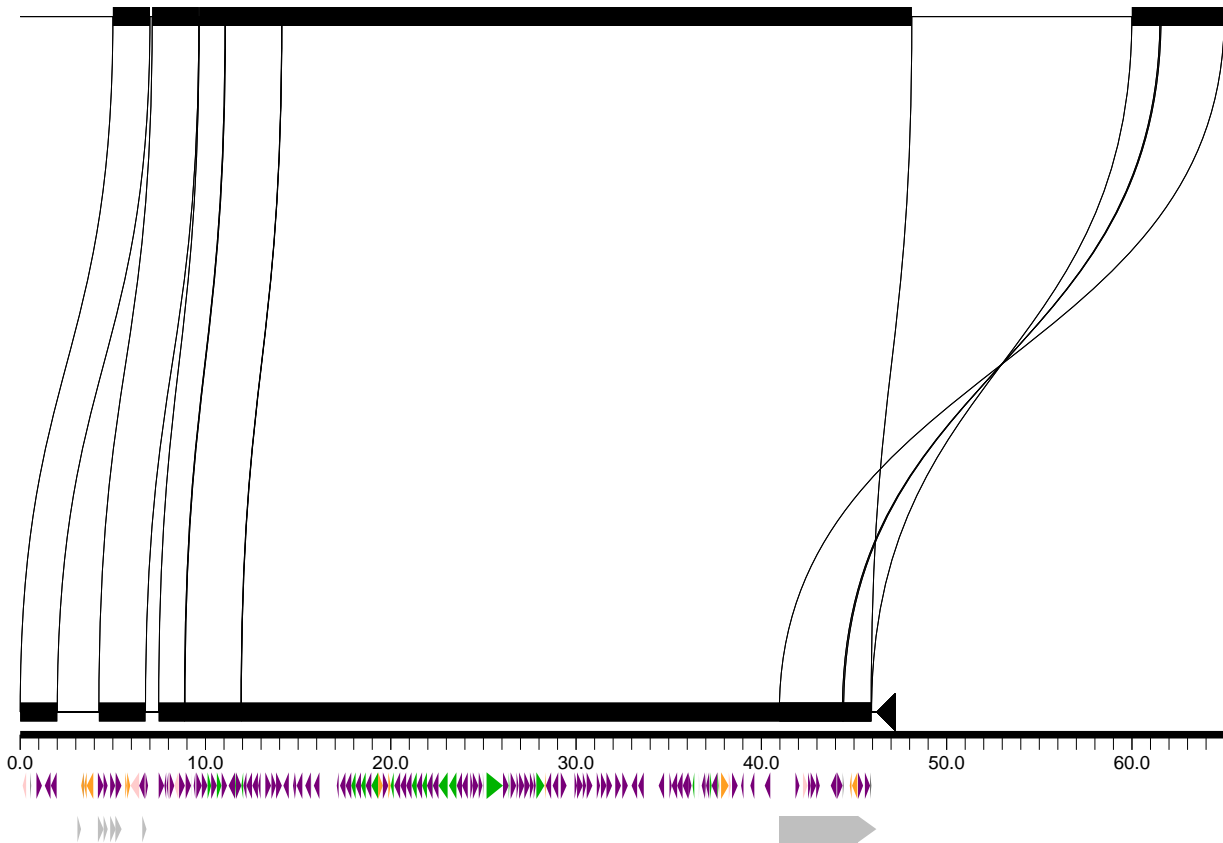



Clone: WIBR2-0550E16 Accession: AC196504

ESP Prediction: S Validation: I Mechanism: NAHR ?

Other Simple Repeat Low Complexity DNA LTR LINE SINE

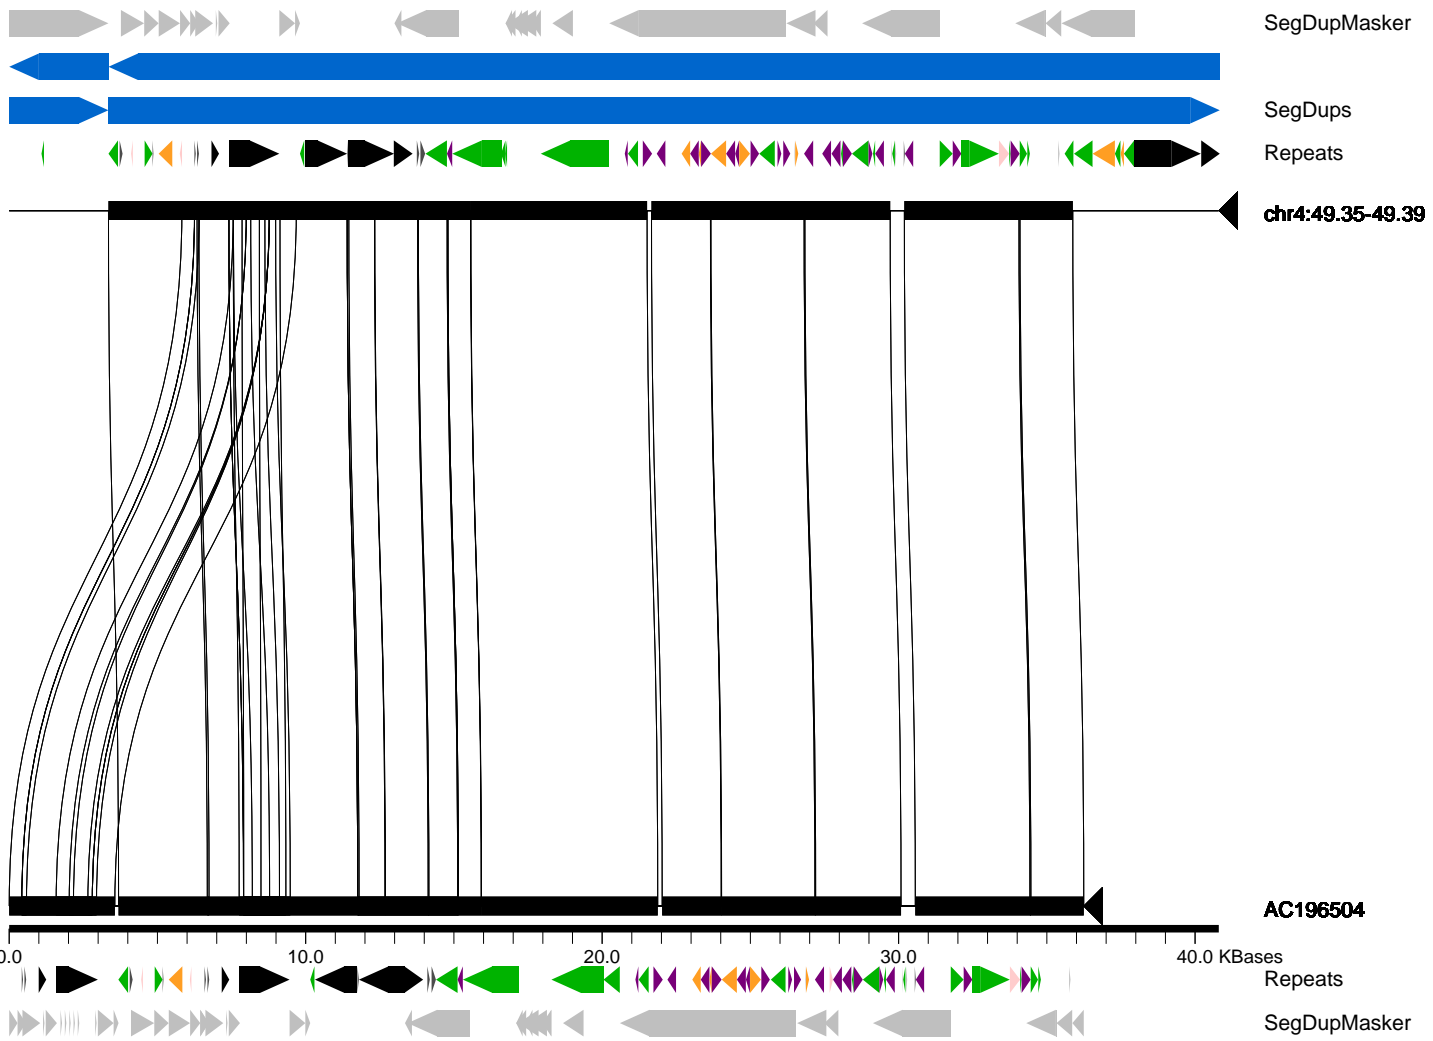

Clone: WIBR2-0842H18 Accession: AC196508

ESP Prediction: INV Validation: V Mechanism: NAHR (?)

Other Simple Repeat Low Complexity DNA LTR LINE SINE

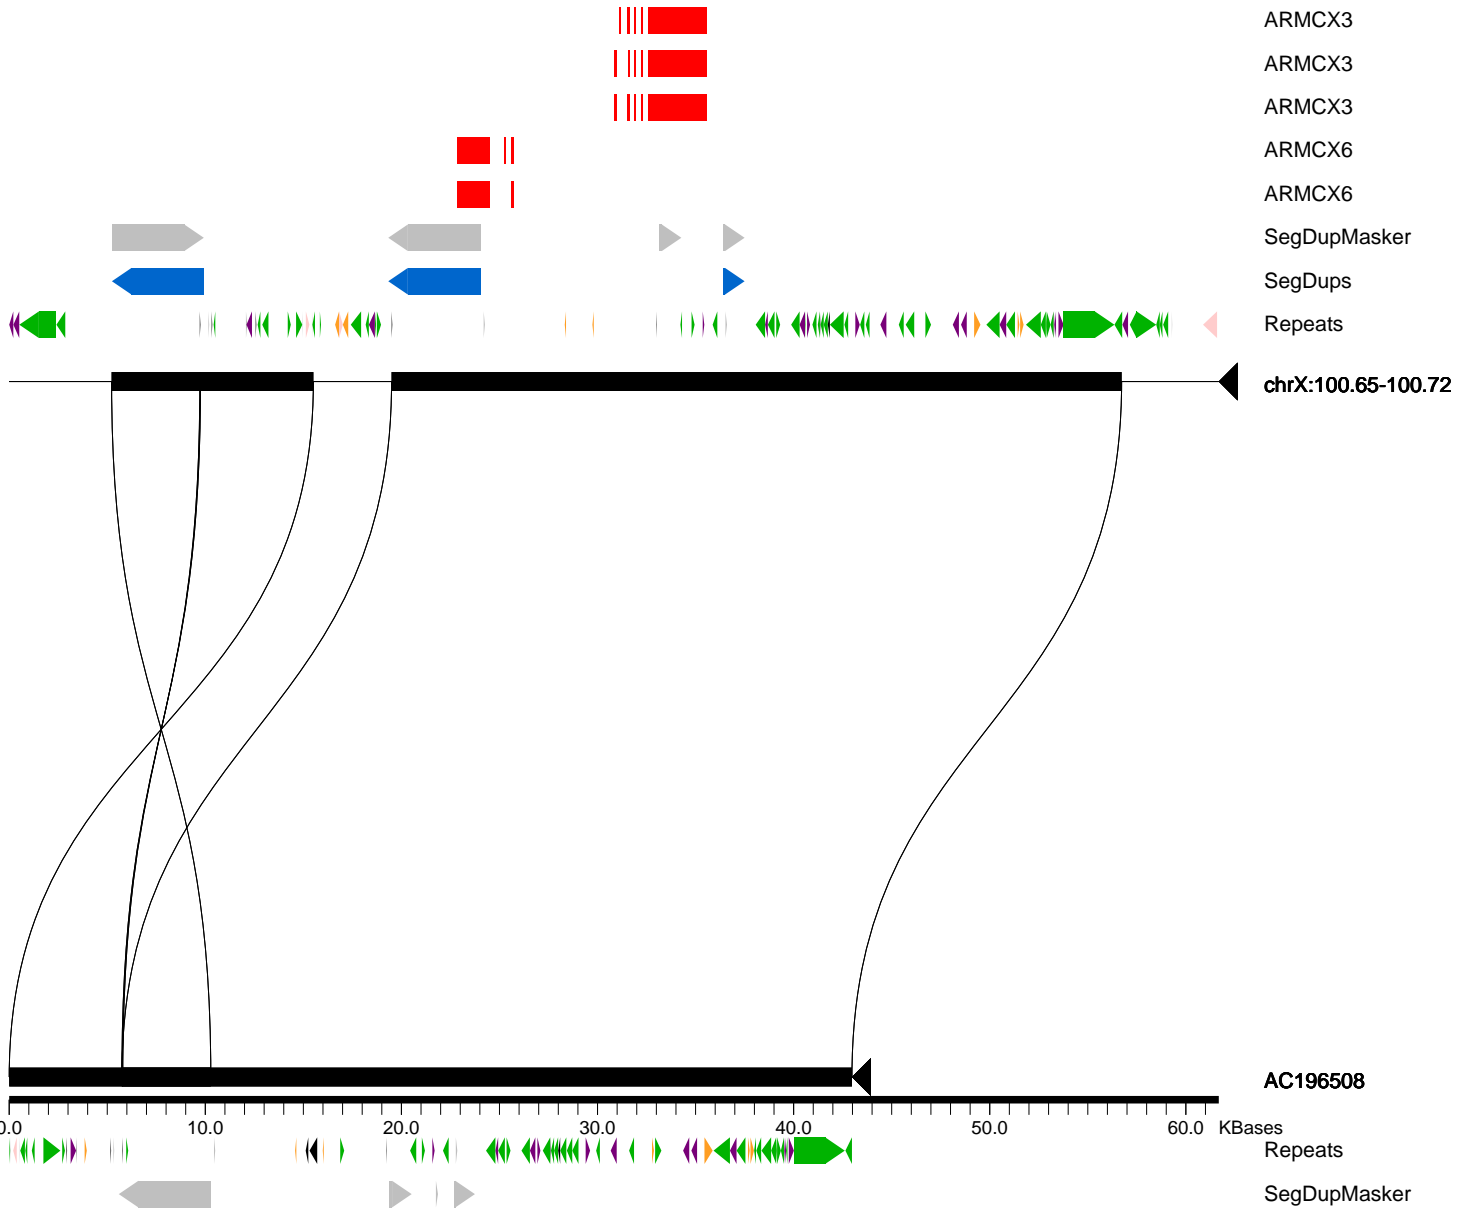

Clone: WIBR2-0851M14 Accession: AC196509

ESP Prediction: S Validation: U Mechanism: NAHR

Other Simple Repeat Low Complexity DNA LTR LINE SINE

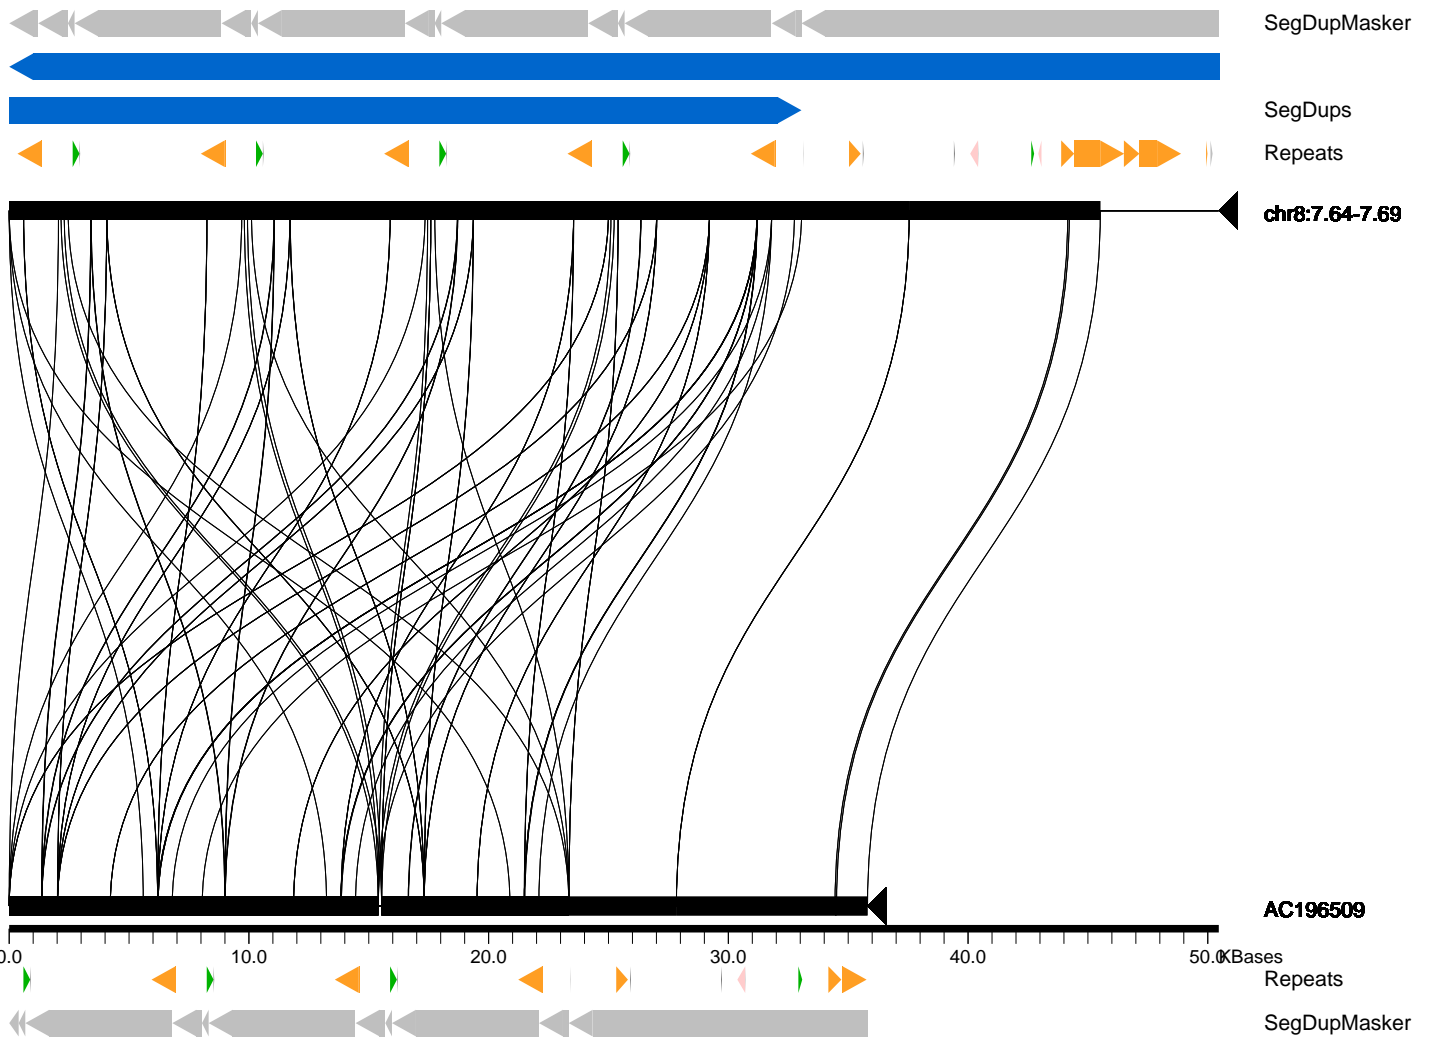

Clone: WIBR2-0979K06 Accession: AC193117

ESP Prediction: INV Validation: V Mechanism: NAHR(?)

Other Simple Repeat Low Complexity DNA LTR LINE SINE

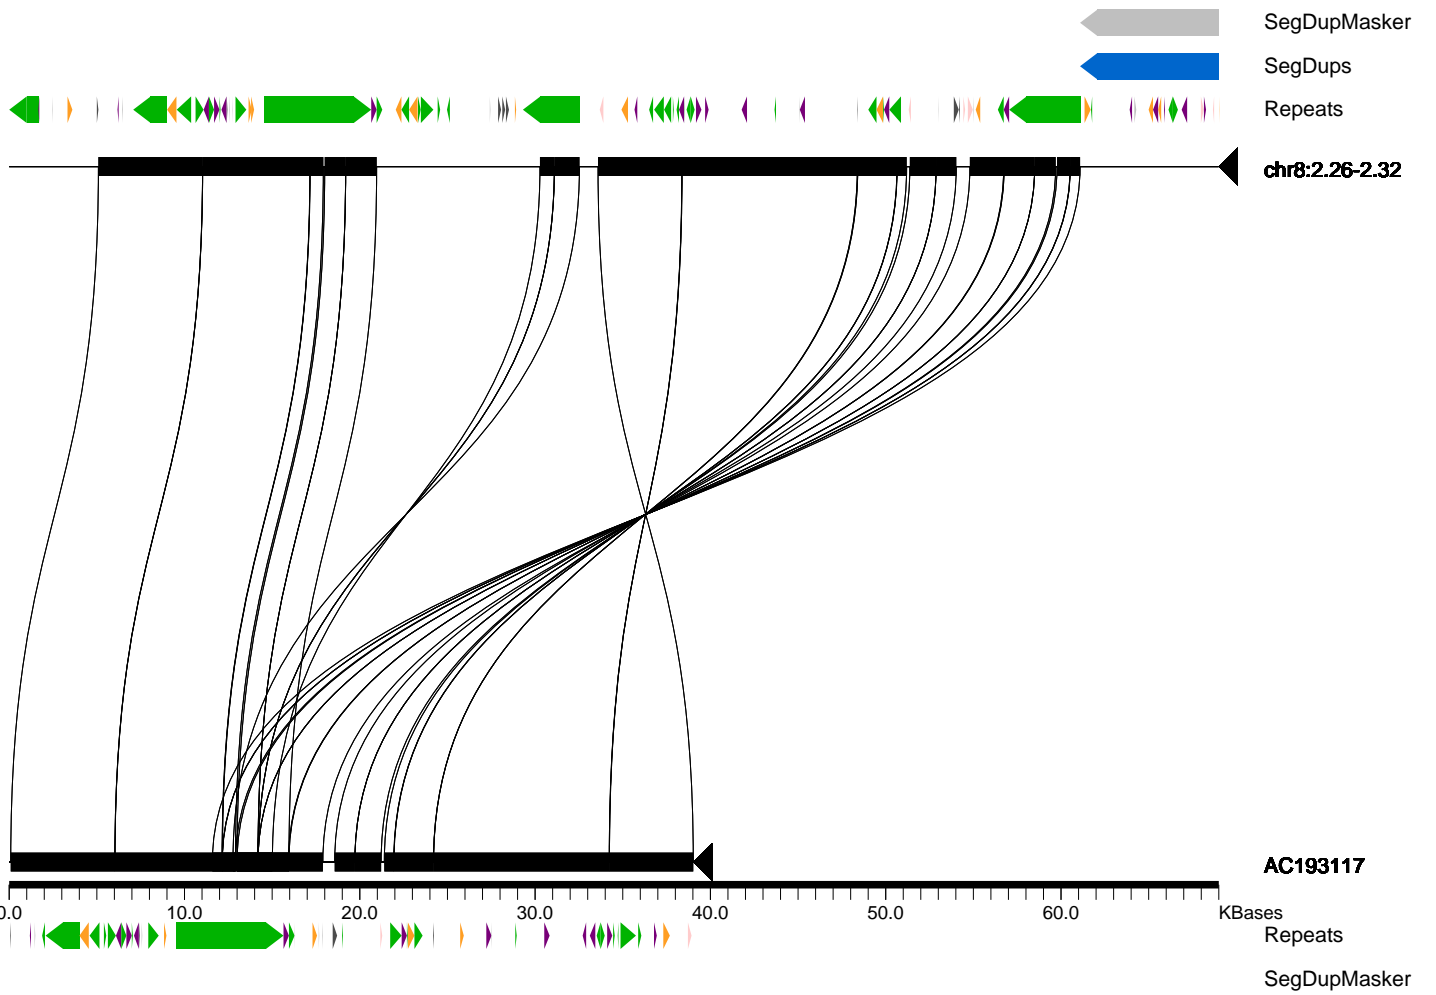

Clone: WIBR2-1043J20 Accession: AC192820

ESP Prediction: B Validation: D Mechanism: NAHR

Other Simple Repeat Low Complexity DNA LTR LINE SINE

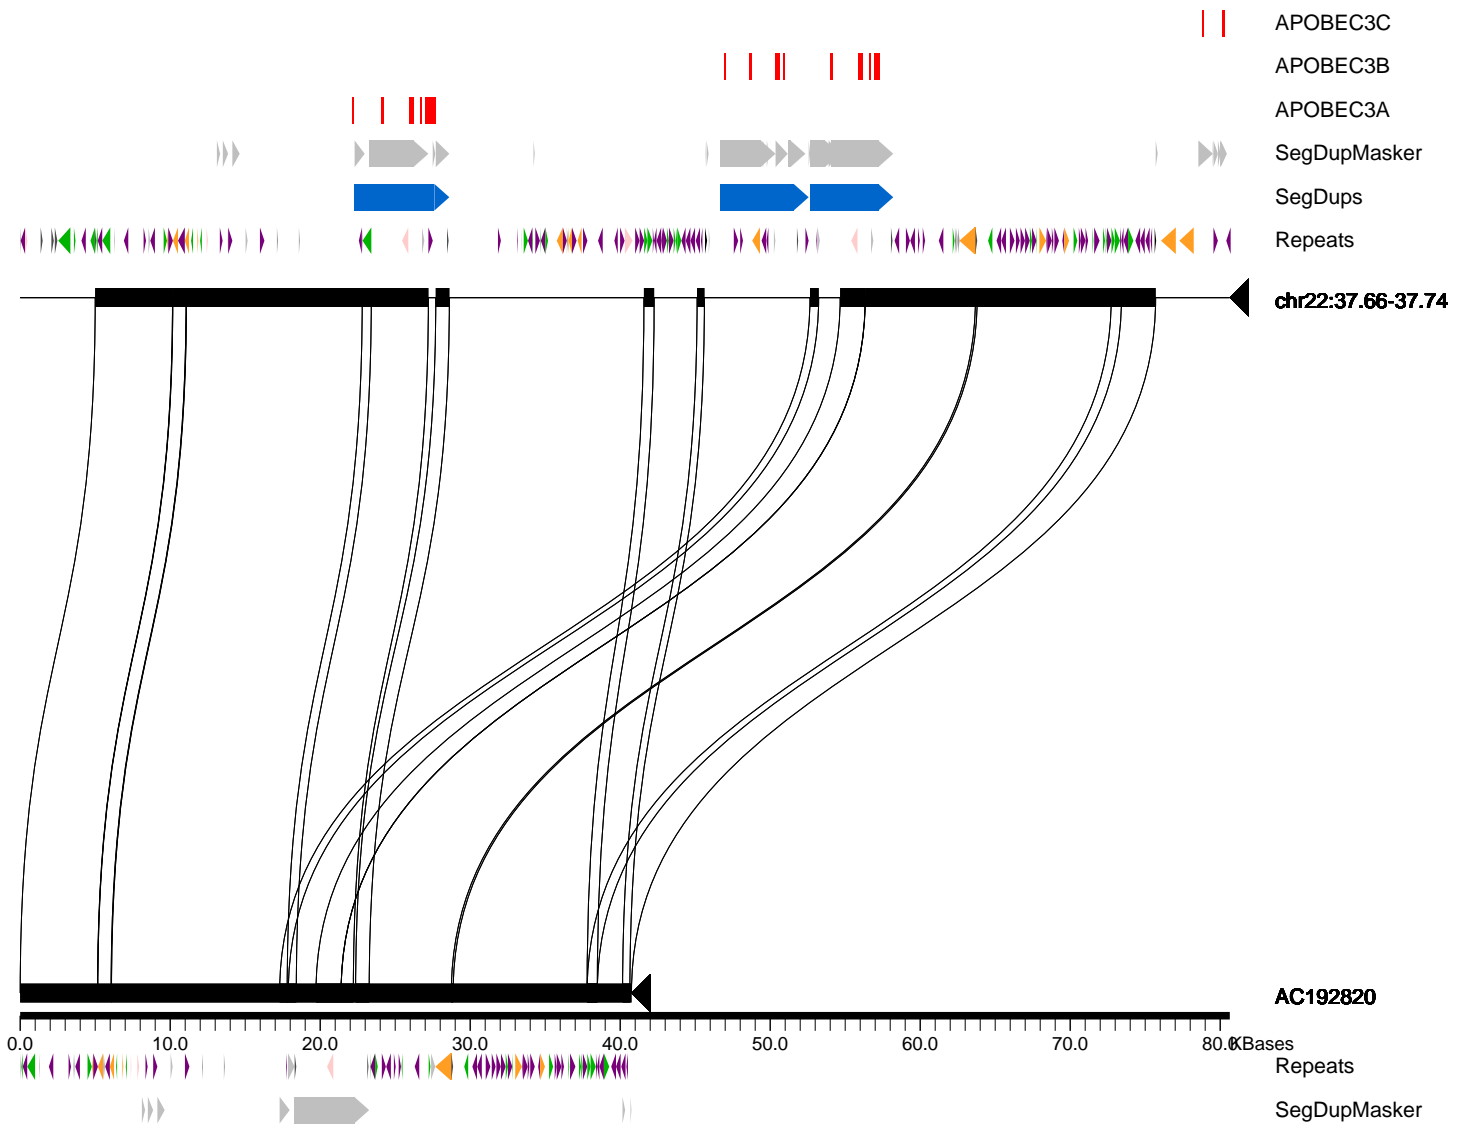

Clone: WIBR2-2609M07 Accession: AC195760

ESP Prediction: S Validation: I Mechanism: NAHR

Other Simple Repeat Low Complexity DNA LTR LINE SINE

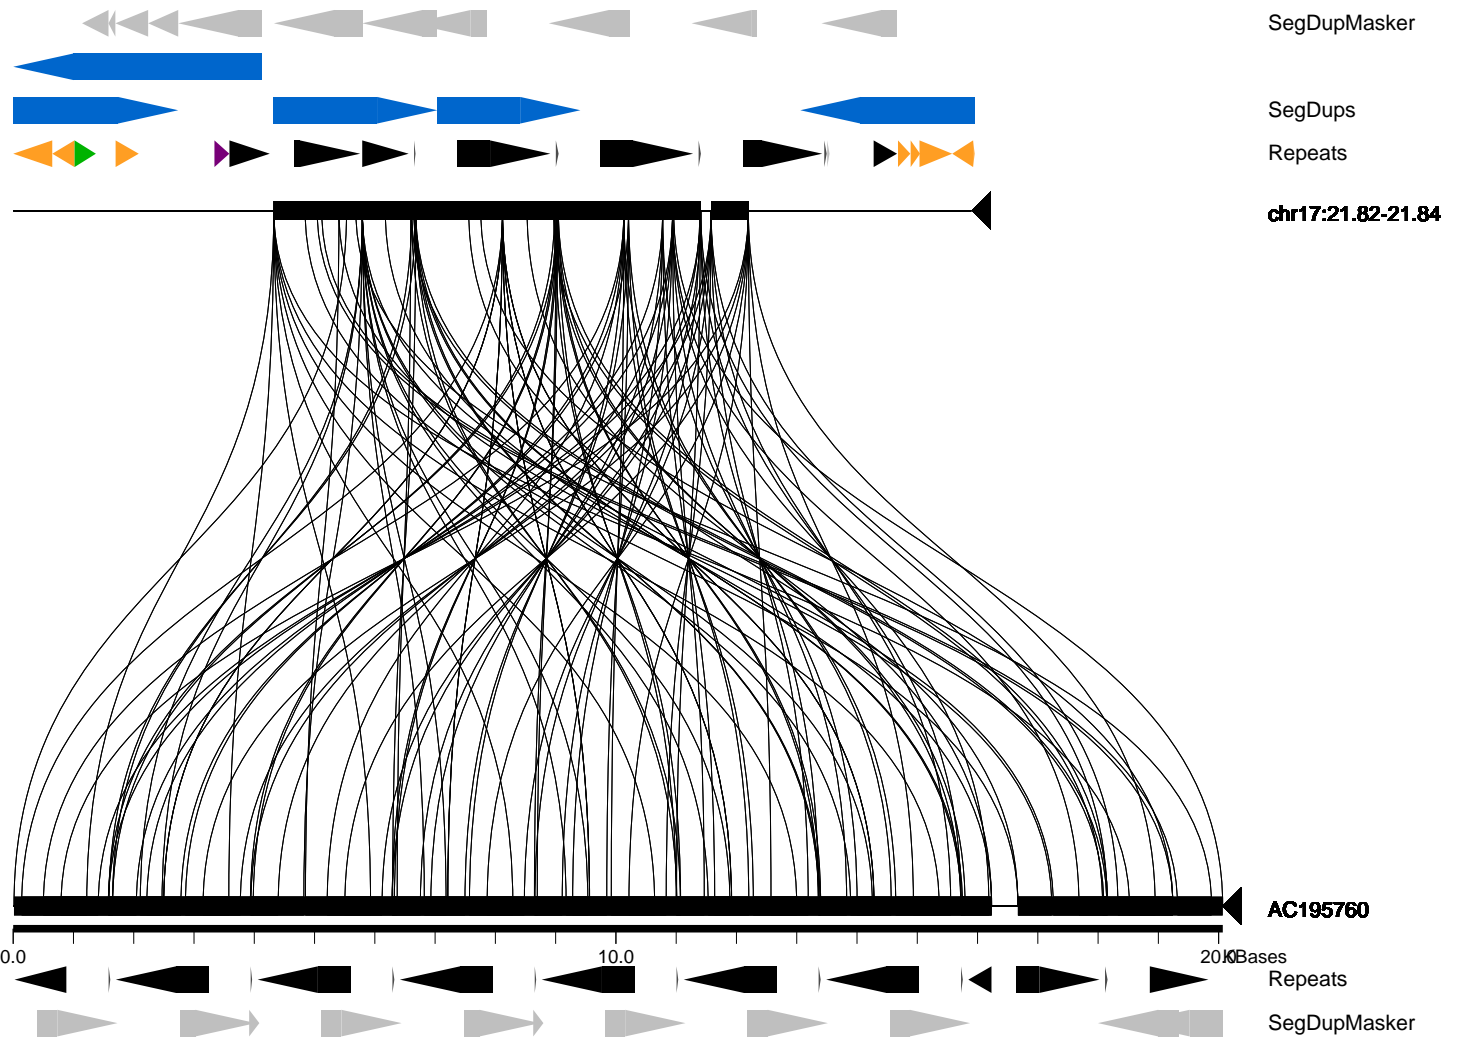

Clone: WIBR2-2397C12 Accession: AC193142

ESP Prediction: B Validation: D Mechanism: NAHR

Other Simple Repeat Low Complexity DNA LTR LINE SINE

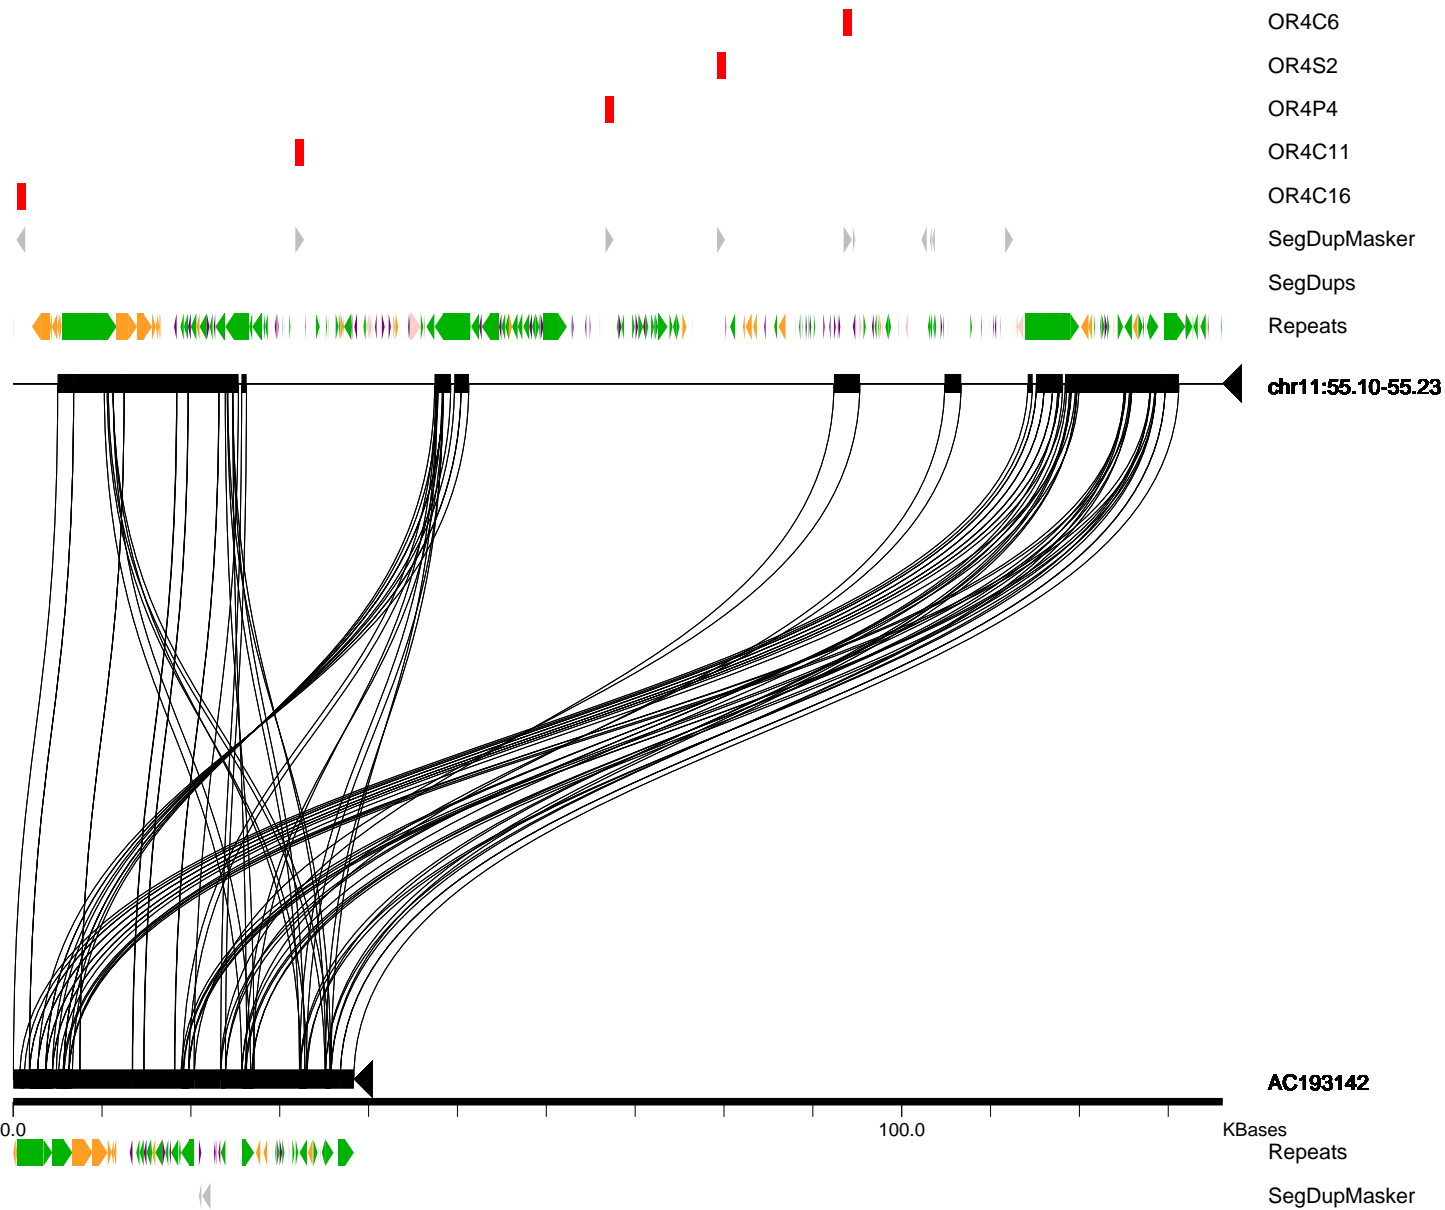

Clone: WIBR2-2390E03 Accession: AC196531

ESP Prediction: B Validation: D Mechanism: NAHR

Other Simple Repeat Low Complexity DNA LTR LINE SINE

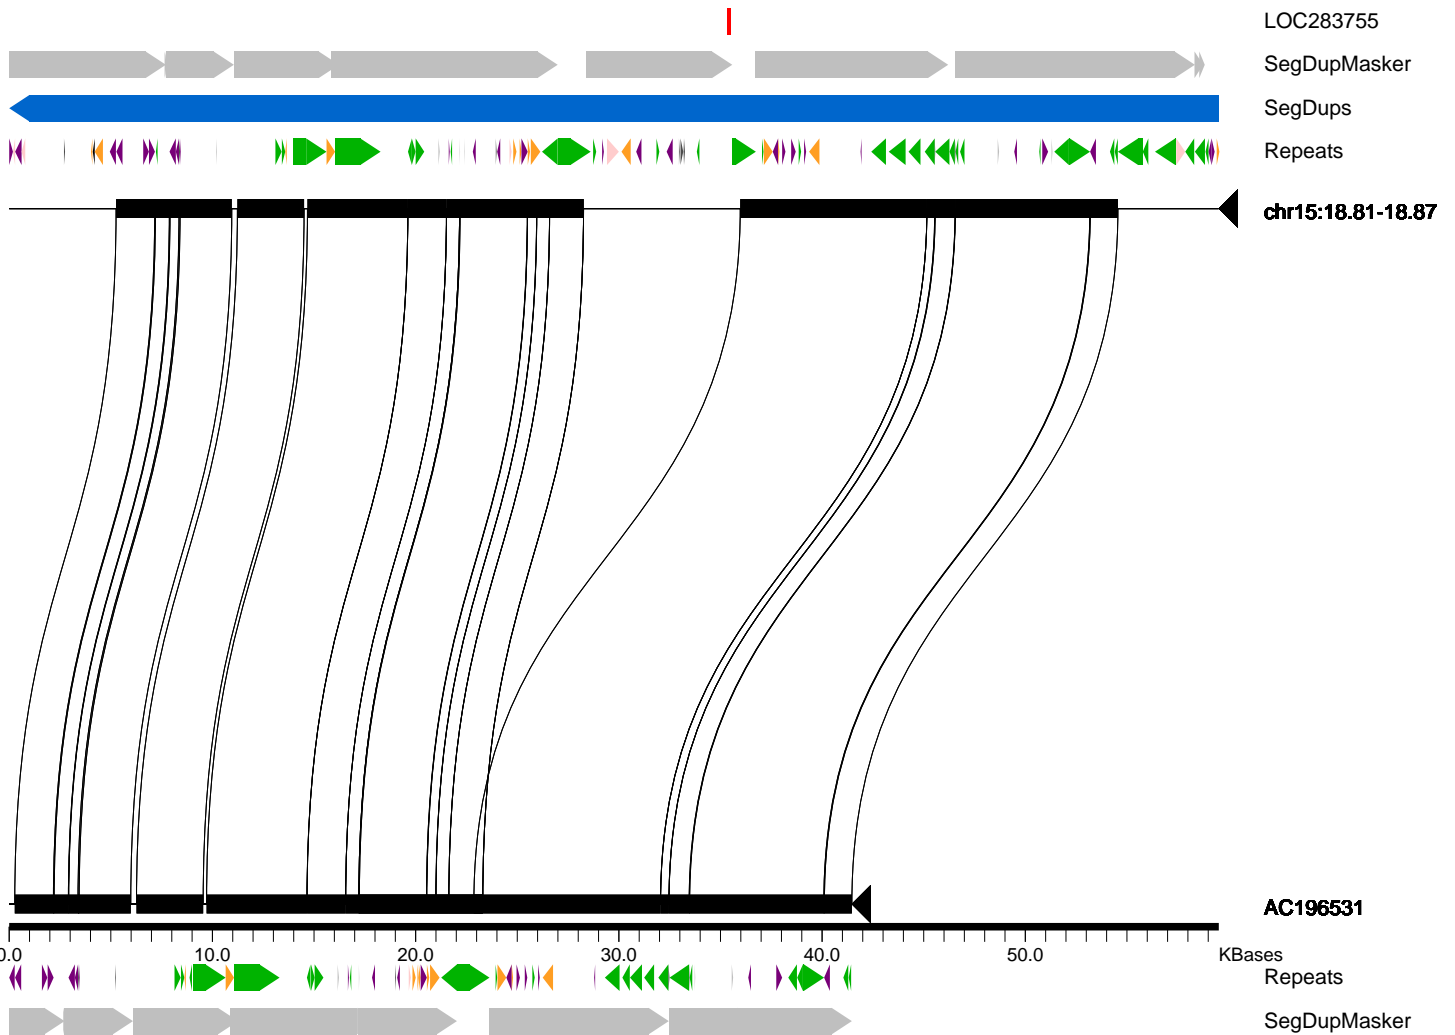



Clone: WIBR2-1267B16 Accession: AC158319

ESP Prediction: S Validation: I Mechanism: NAHR

Other Simple Repeat Low Complexity DNA LTR LINE SINE

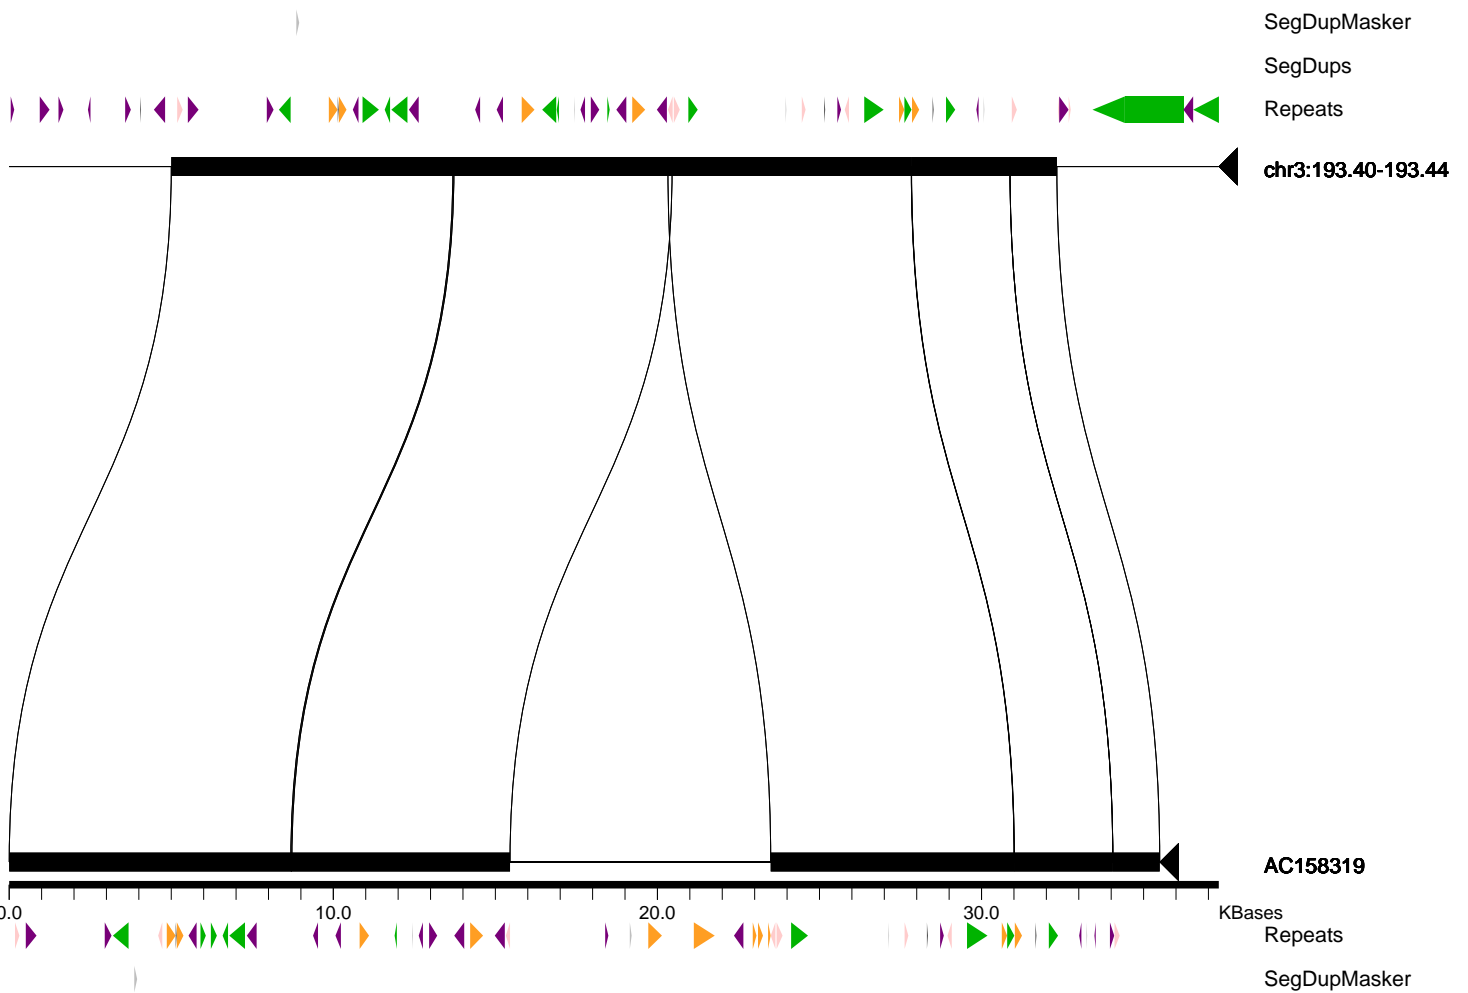

Clone: WIBR2-1615I06 Accession: AC193125

ESP Prediction: S Validation: U,complex Mechanism: NAHR

Other Simple Repeat Low Complexity DNA LTR LINE SINE

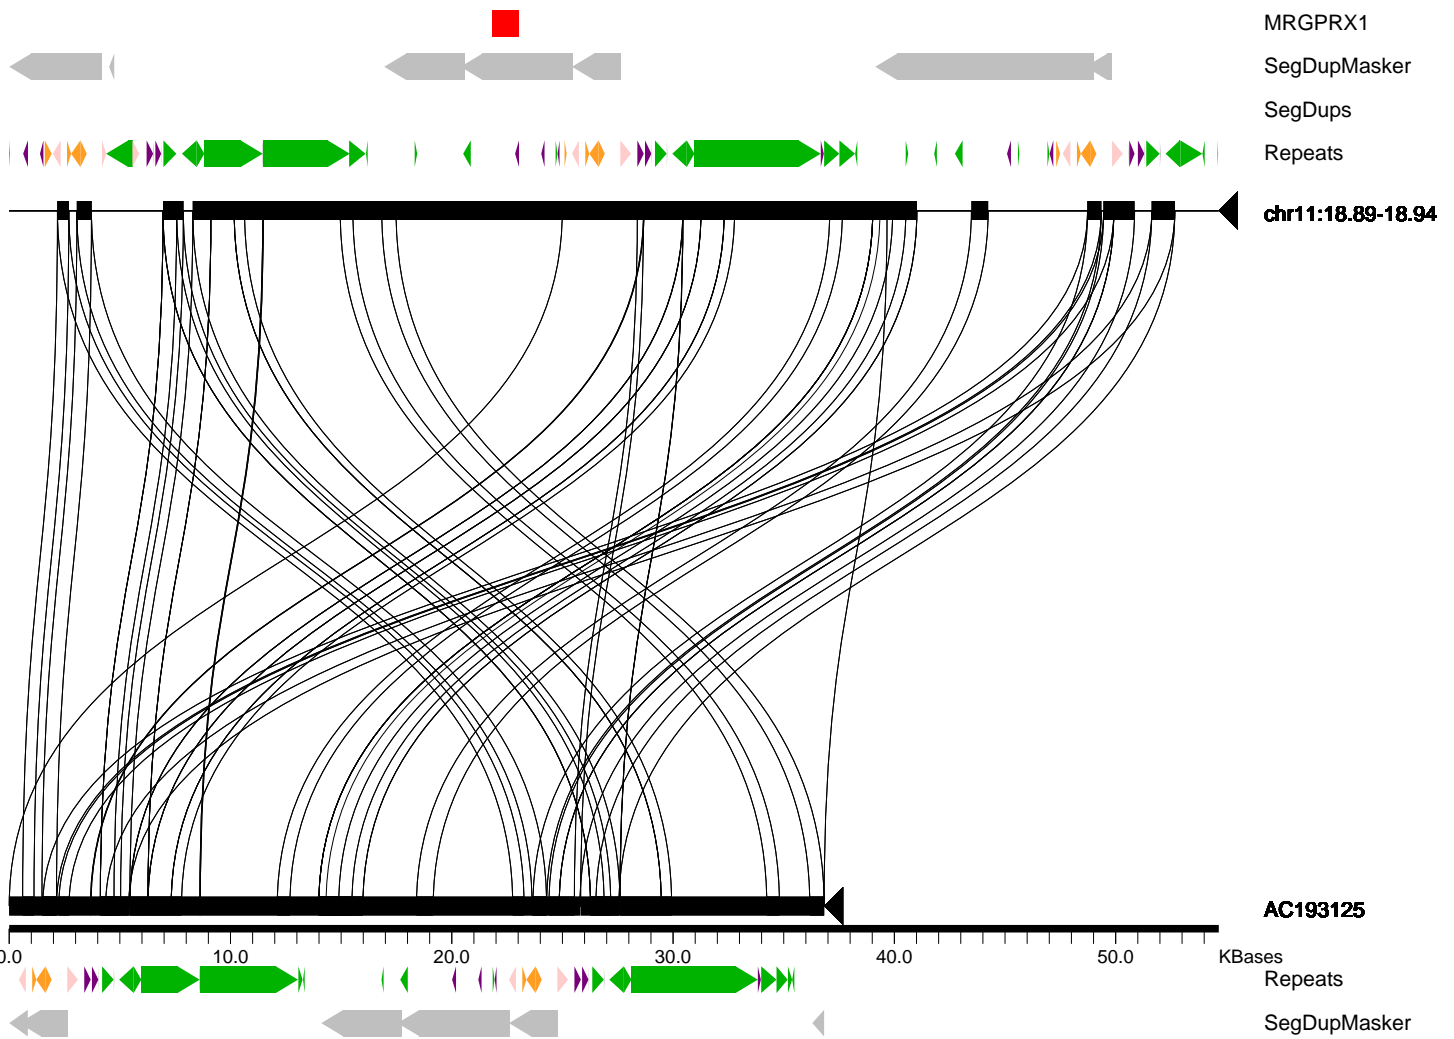

Clone: WIBR2-2734L20 Accession: AC193151

ESP Prediction: INV Validation: V Mechanism: NAHR

Other Simple Repeat Low Complexity DNA LTR LINE SINE

SegDupMasker

SegDups

Repeats

chr2:184.39-184.44

AC193151

Repeats

SegDupMasker

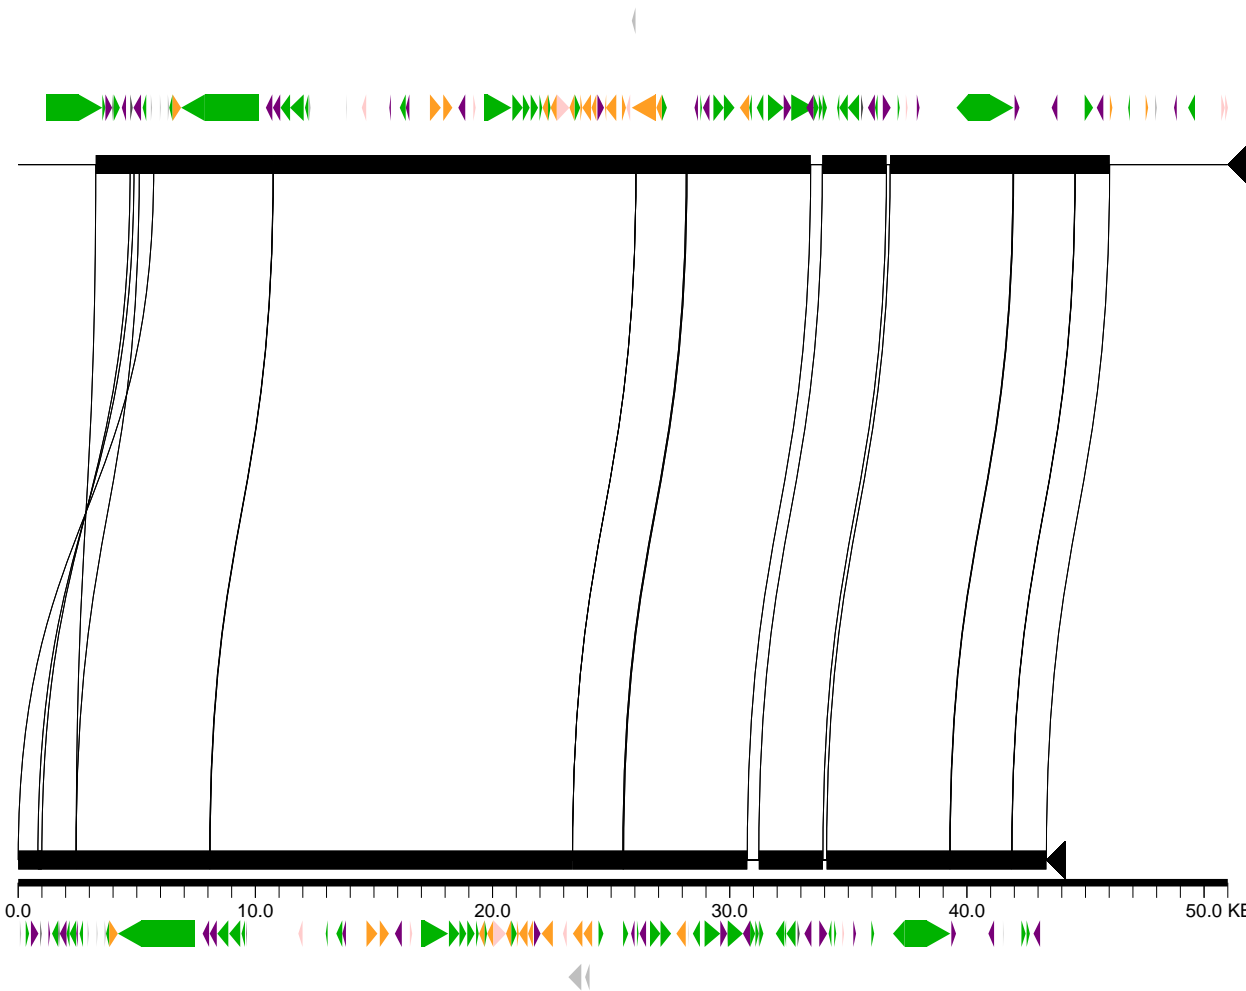

Clone: WIBR2-2640D06 Accession: AC193149

ESP Prediction: S Validation: I Mechanism: NAHR

Other Simple Repeat Low Complexity DNA LTR LINE SINE

SegDupMasker

SegDups

Repeats

chrX:56.66-56.70

AC193149

KBases

Repeats

SegDupMasker

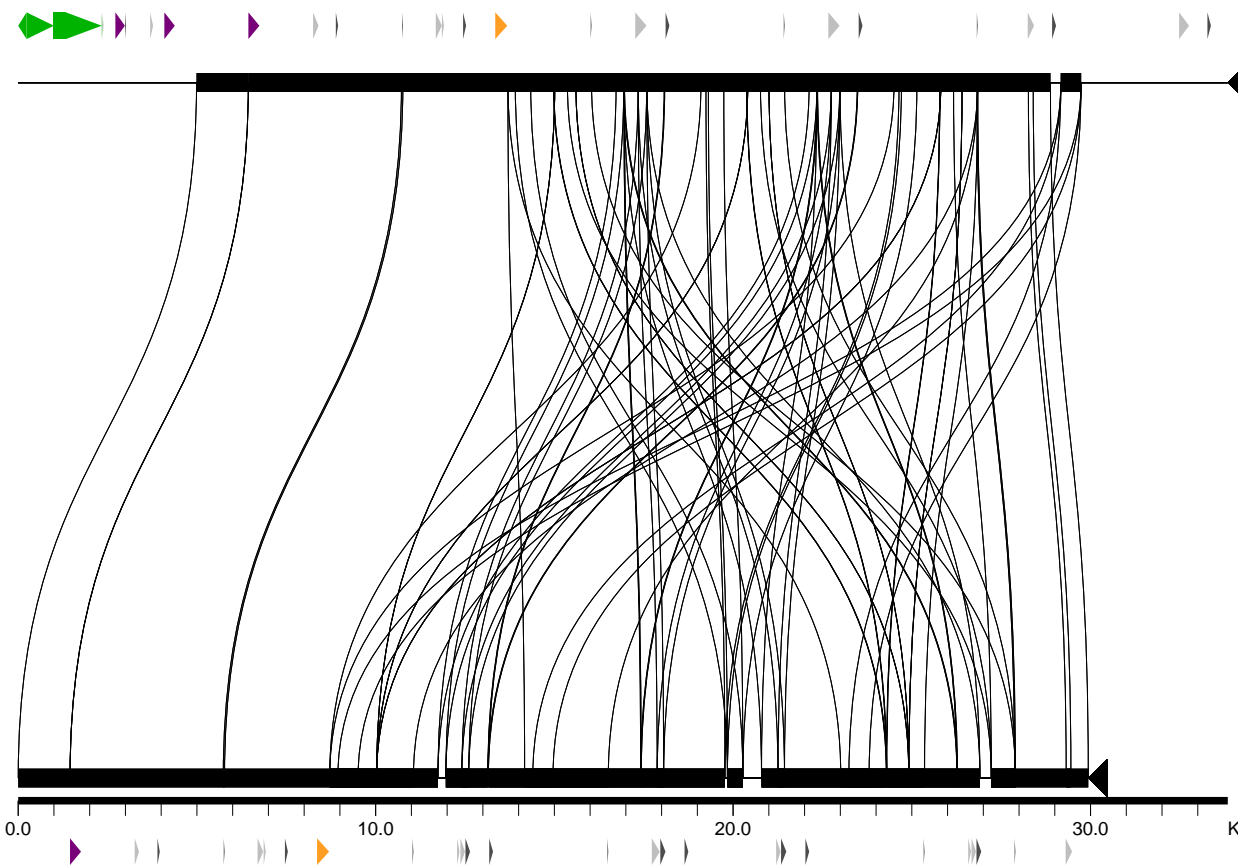

Clone: WIBR2-2588B13 Accession: AC153483

ESP Prediction: B Validation: D Mechanism: NAHR?

Other Simple Repeat Low Complexity DNA LTR LINE SINE

SegDupMasker

SegDups

Repeats

chr16:76.91-76.97

AC153483

Repeats

SegDupMasker

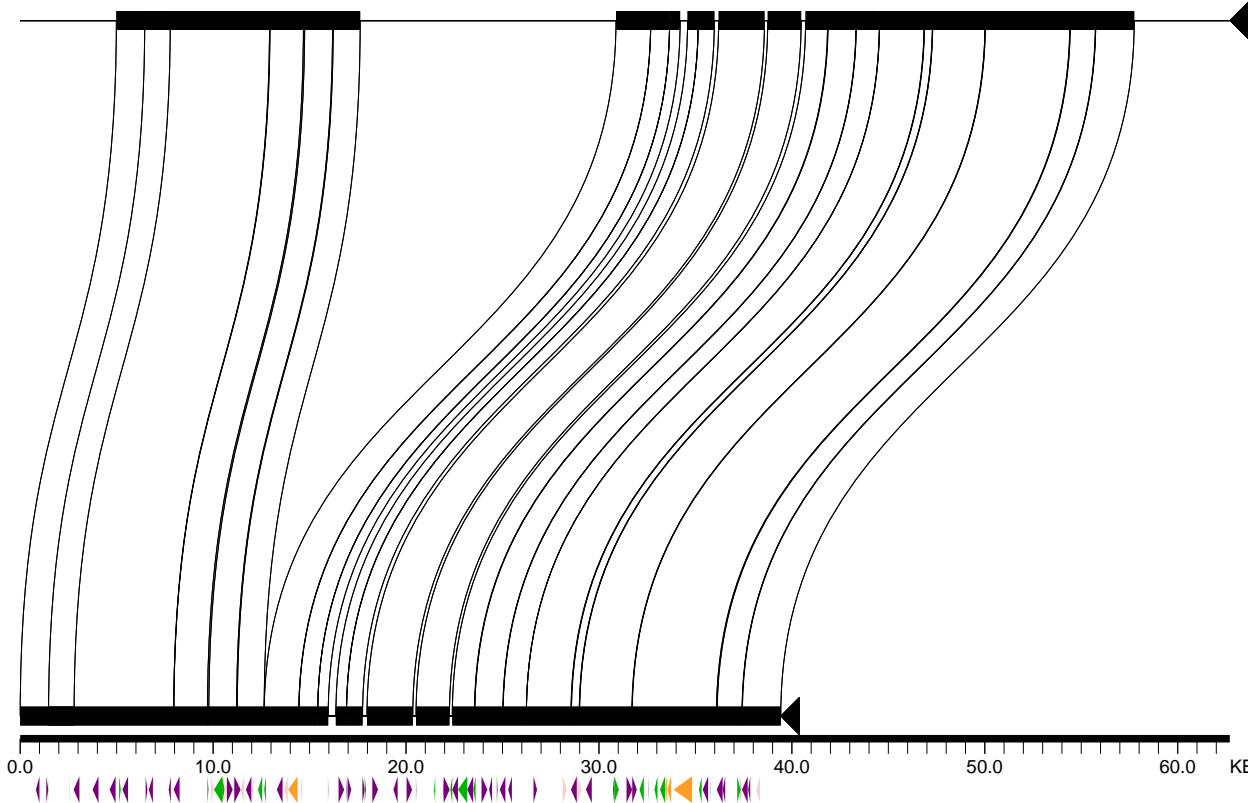

Clone: WIBR2-2533D14 Accession: AC193094

ESP Prediction: INV Validation: V Mechanism: NAHR (?)

Other Simple Repeat Low Complexity DNA LTR LINE SINE

DOCK3

SegDupMasker

SegDups

Repeats

chr3:50.87-50.92

AC193094

Repeats

SegDupMasker

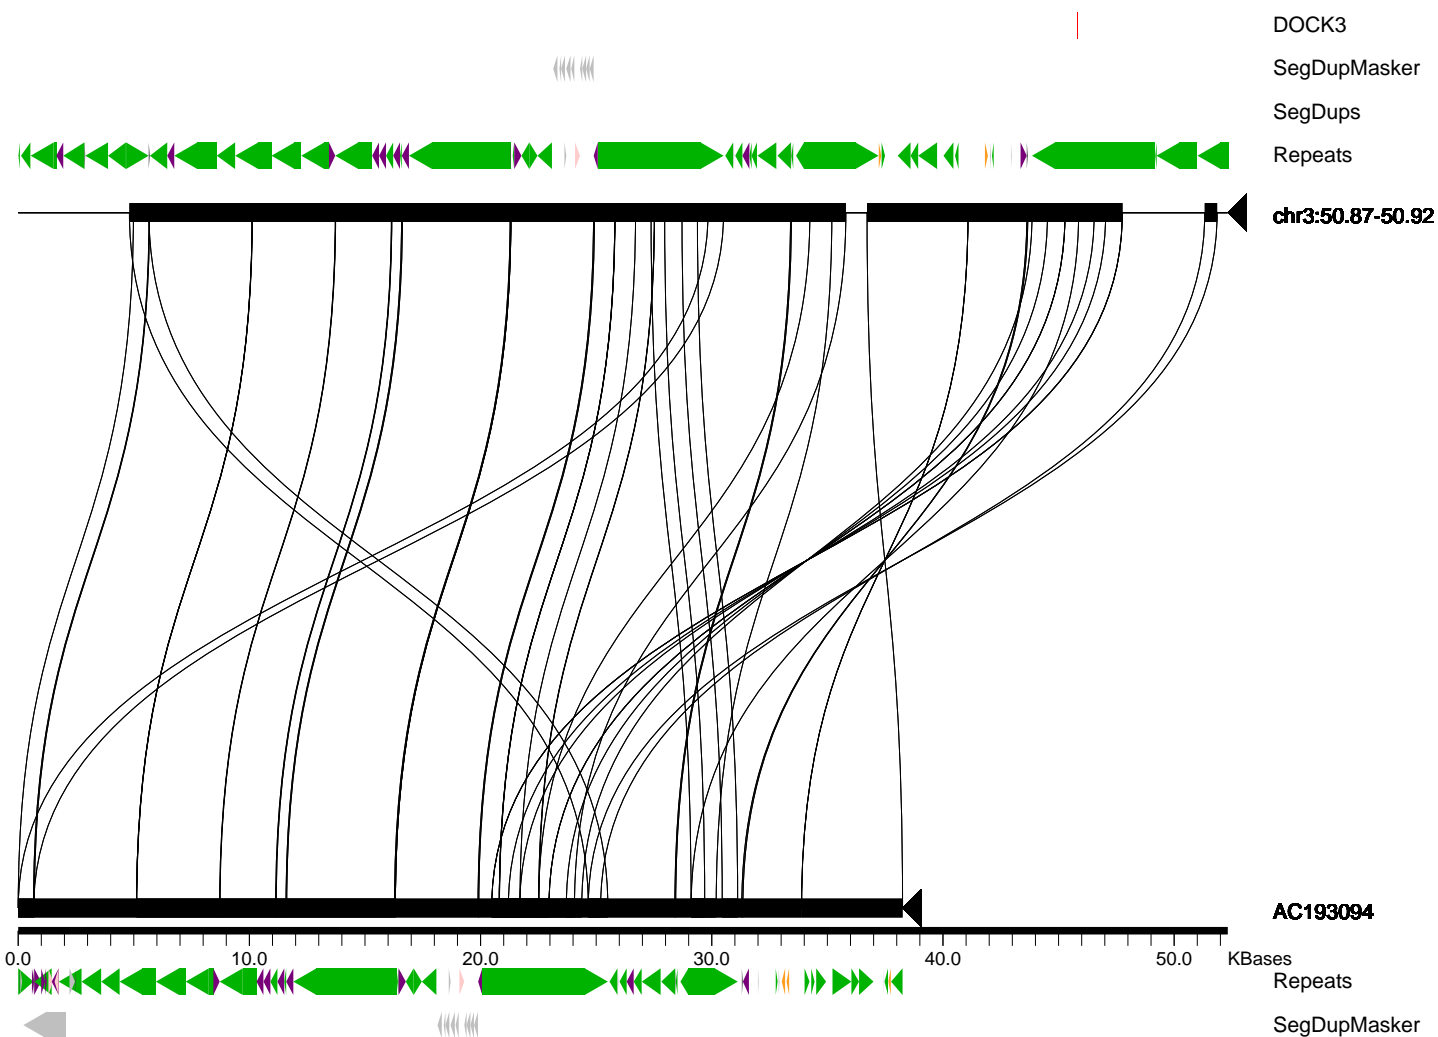

Clone: WIBR2-2527O21 Accession: AC193147

ESP Prediction: INV Validation: V Mechanism: NAHR (?)

Other Simple Repeat Low Complexity DNA LTR LINE SINE

SegDupMasker

SegDups

Repeats

chr9:123.78-123.83

AC193147

Repeats

SegDupMasker

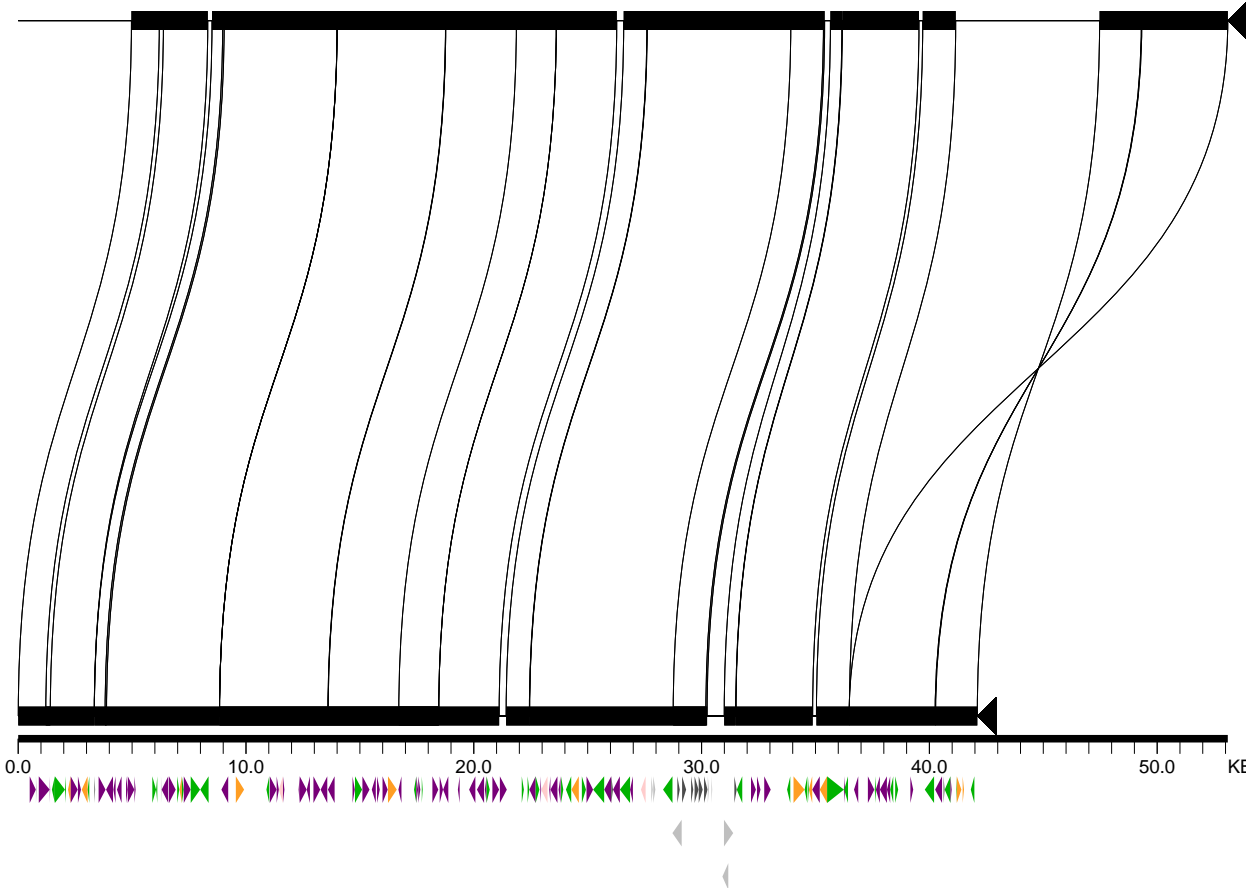

Clone: WIBR2-2365I08 Accession: AC193140

ESP Prediction: B Validation: D Mechanism: NAHR

Other Simple Repeat Low Complexity DNA LTR LINE SINE

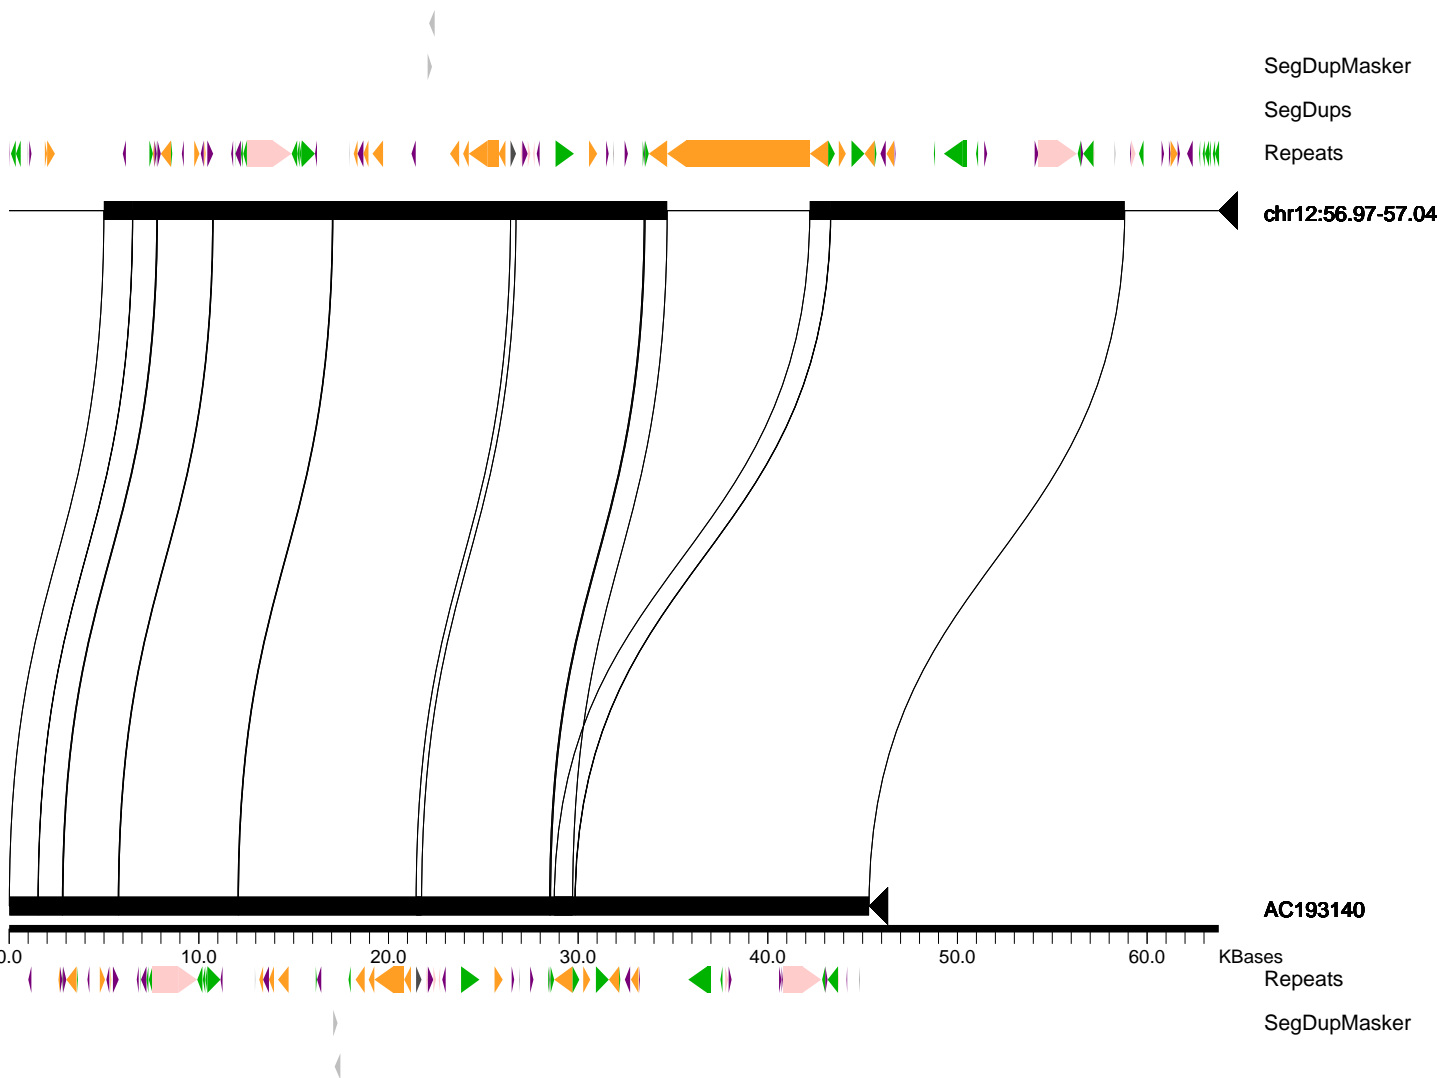



Clone: WIBR2-1396M13 Accession: AC193120

ESP Prediction: INV Validation: V Mechanism: NAHR (?)

Other Simple Repeat Low Complexity DNA LTR LINE SINE

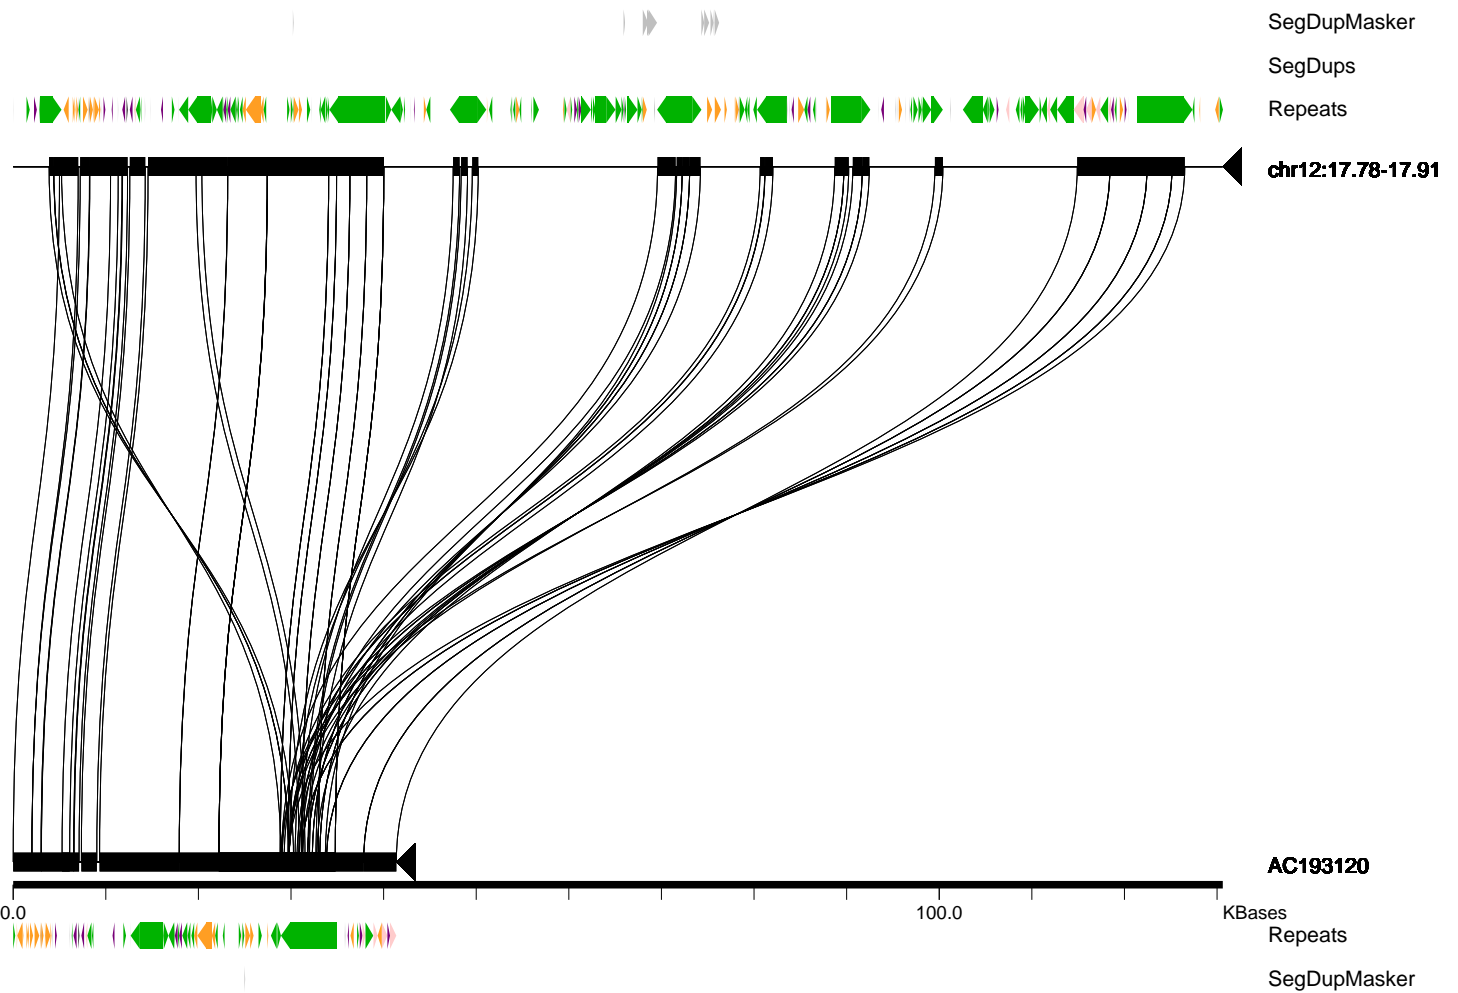

Clone: WIBR2-1416C06 Accession: AC193093

ESP Prediction: B Validation: D Mechanism: NAHR

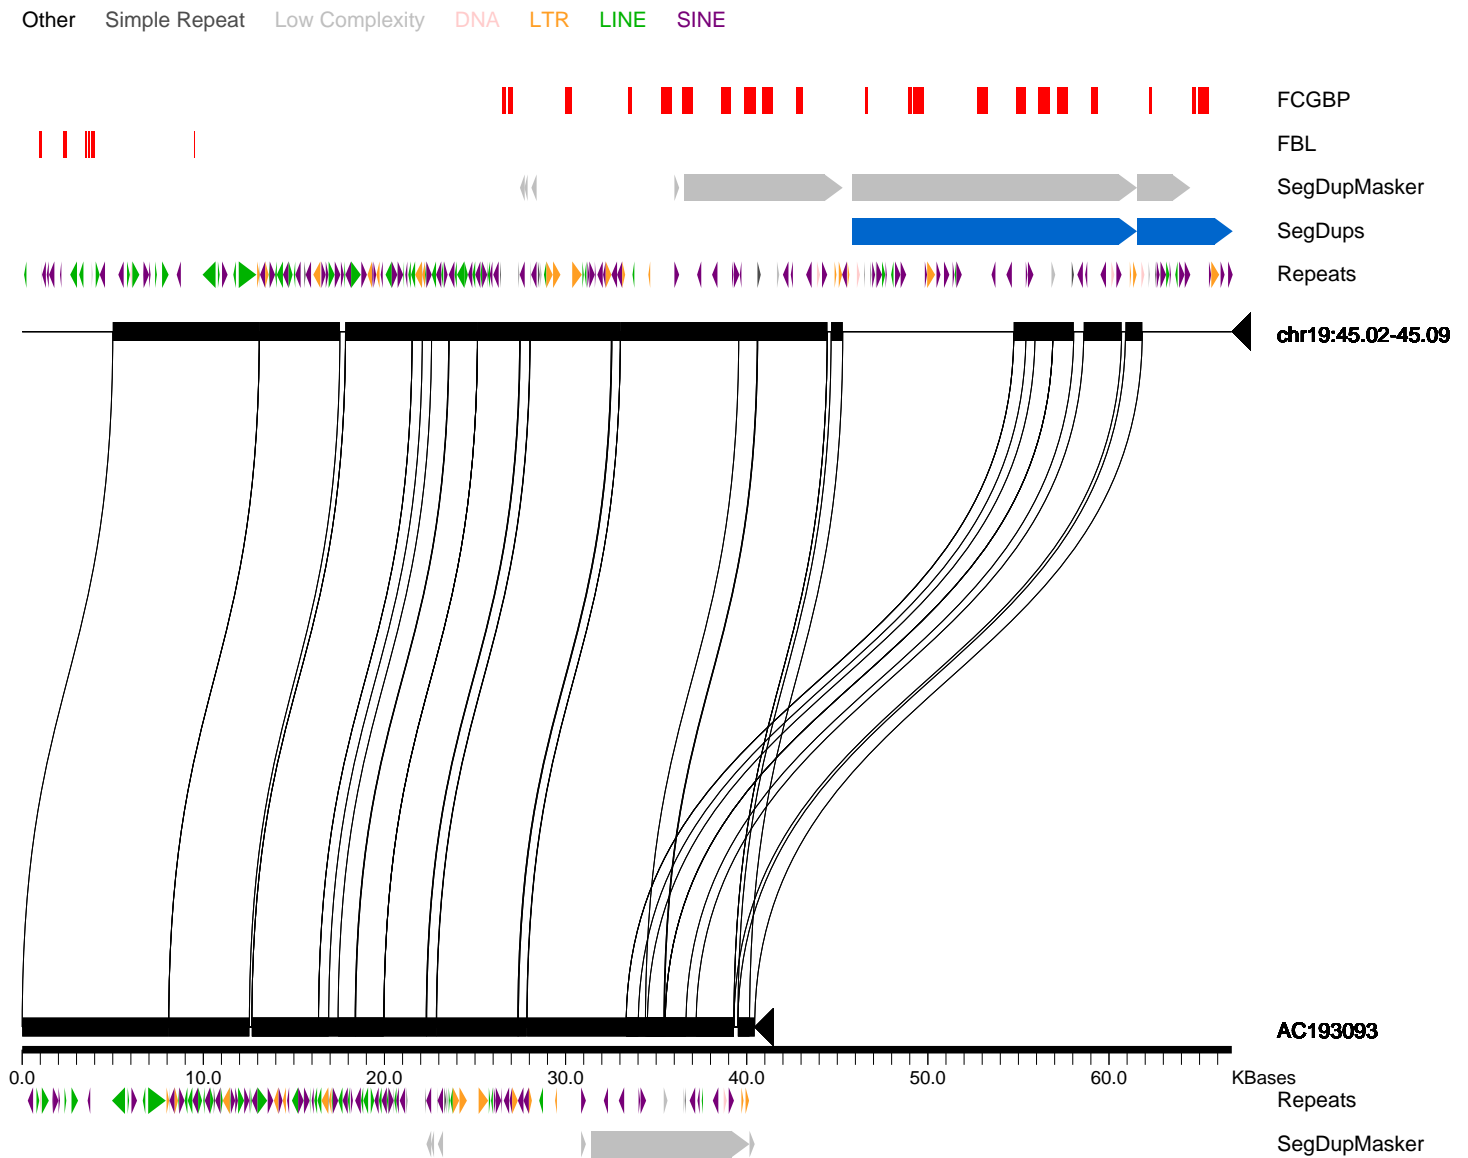

Clone: WIBR2-1322F13 Accession: AC153482

ESP Prediction: B Validation: D Mechanism: NAHR

Other Simple Repeat Low Complexity DNA LTR LINE SINE

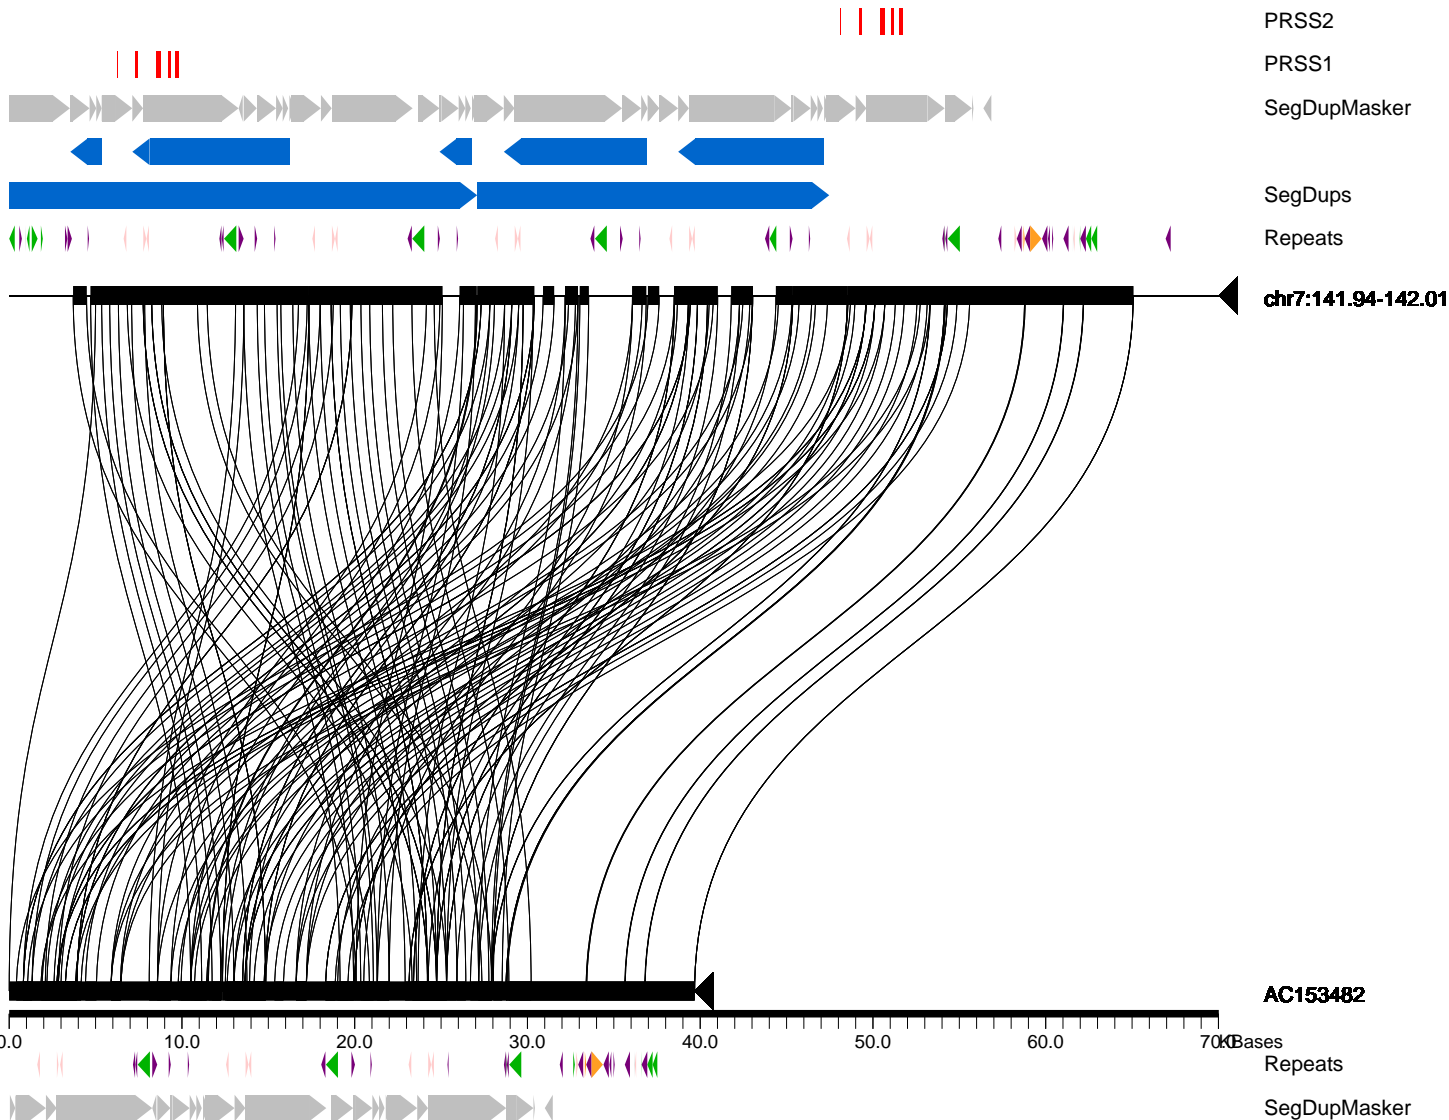

Clone: WIBR2-1318D13 Accession: AC158321

ESP Prediction: INV Validation: V Mechanism: NAHR

Other Simple Repeat Low Complexity DNA LTR LINE SINE

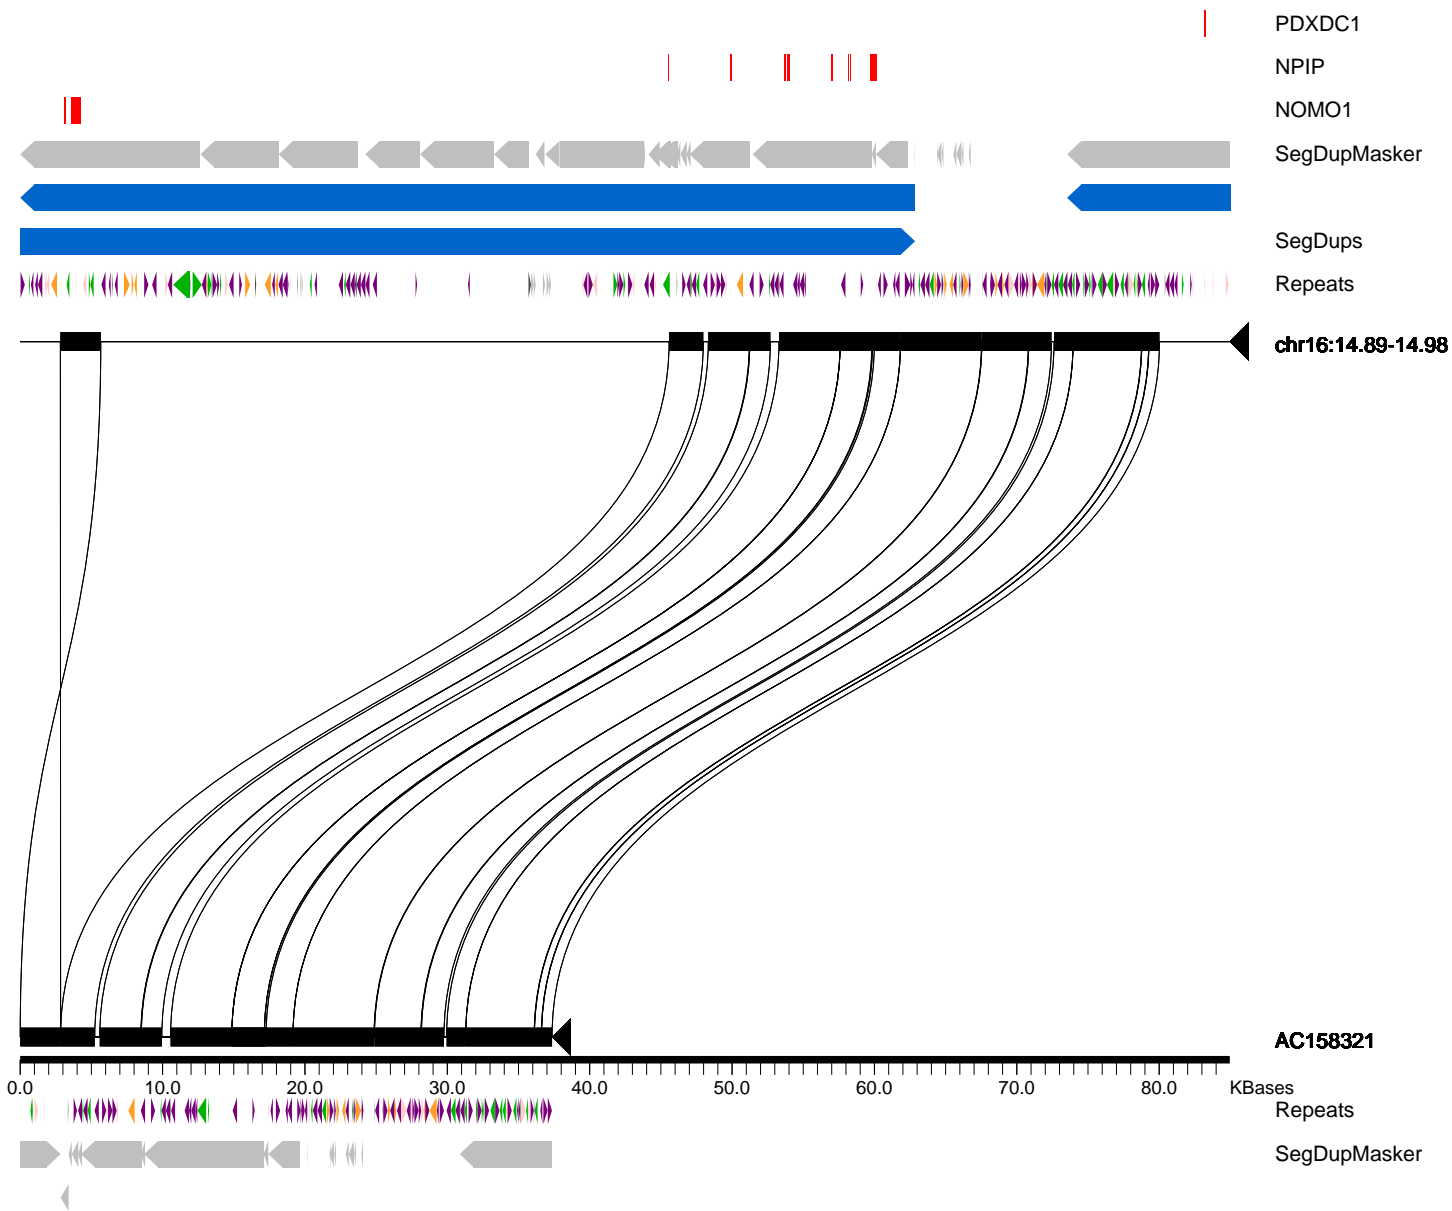

Clone: WIBR2-1263I16 Accession: AC158317

ESP Prediction: B Validation: D Mechanism: NAHR

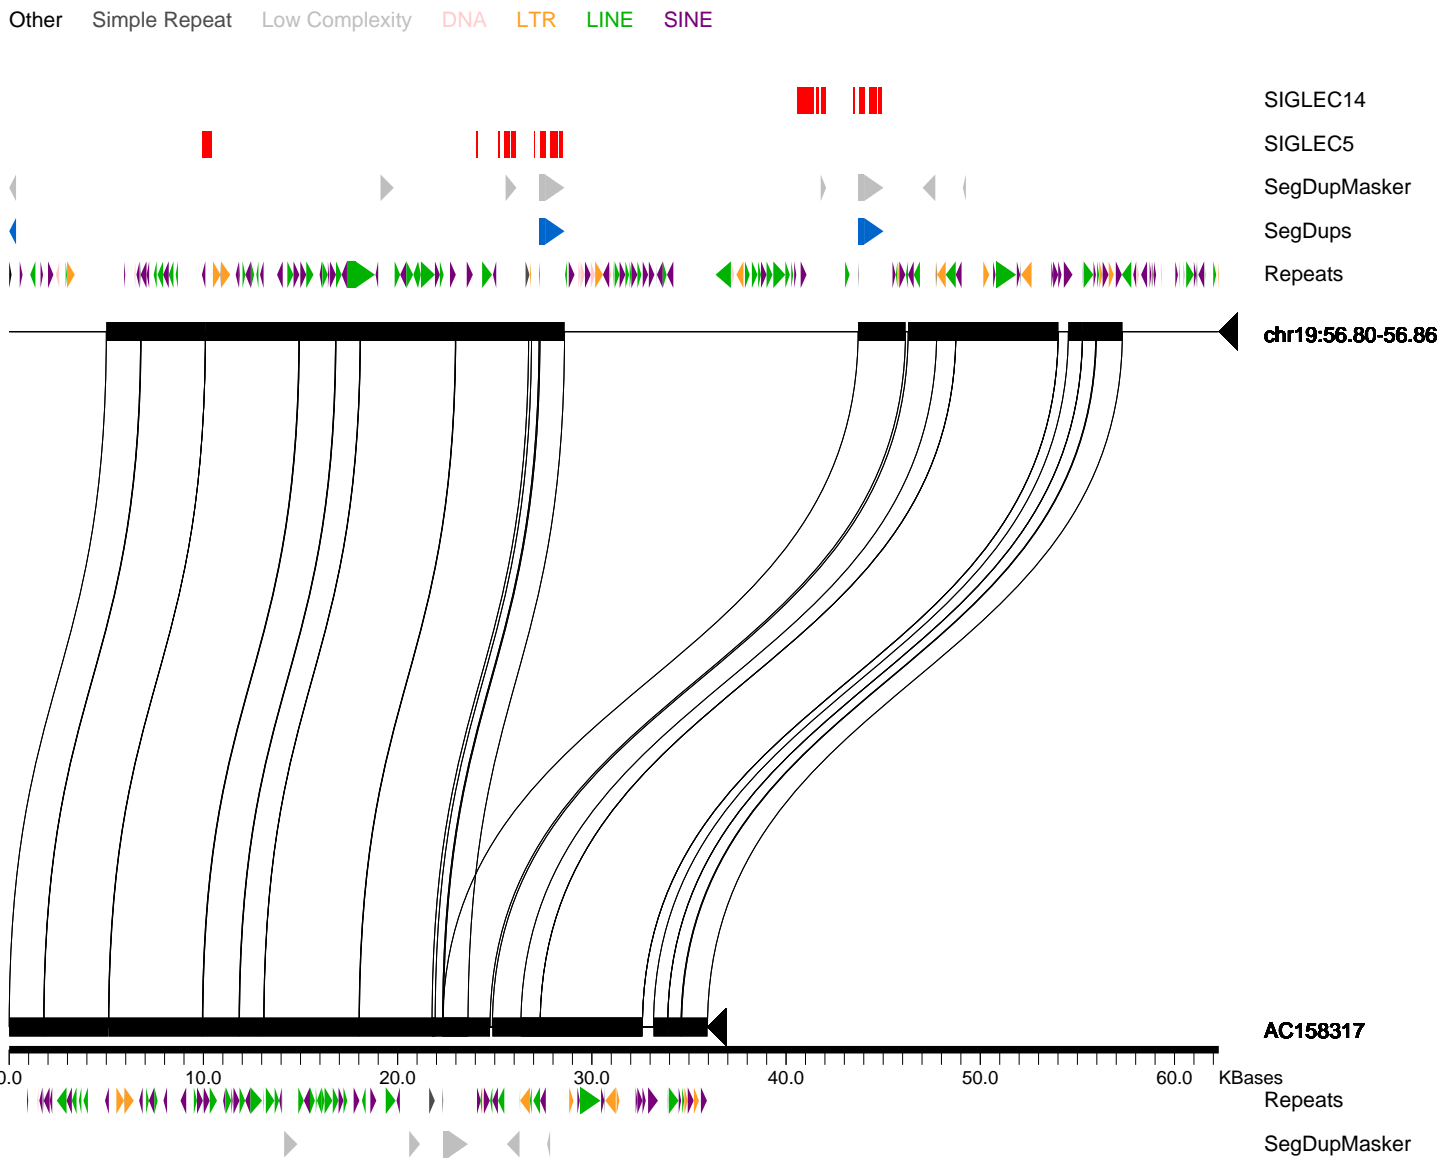

Clone: WIBR2-0994P04 Accession: AC193118

ESP Prediction: INV Validation: VV? Mechanism: NAHR

Other Simple Repeat Low Complexity DNA LTR LINE SINE

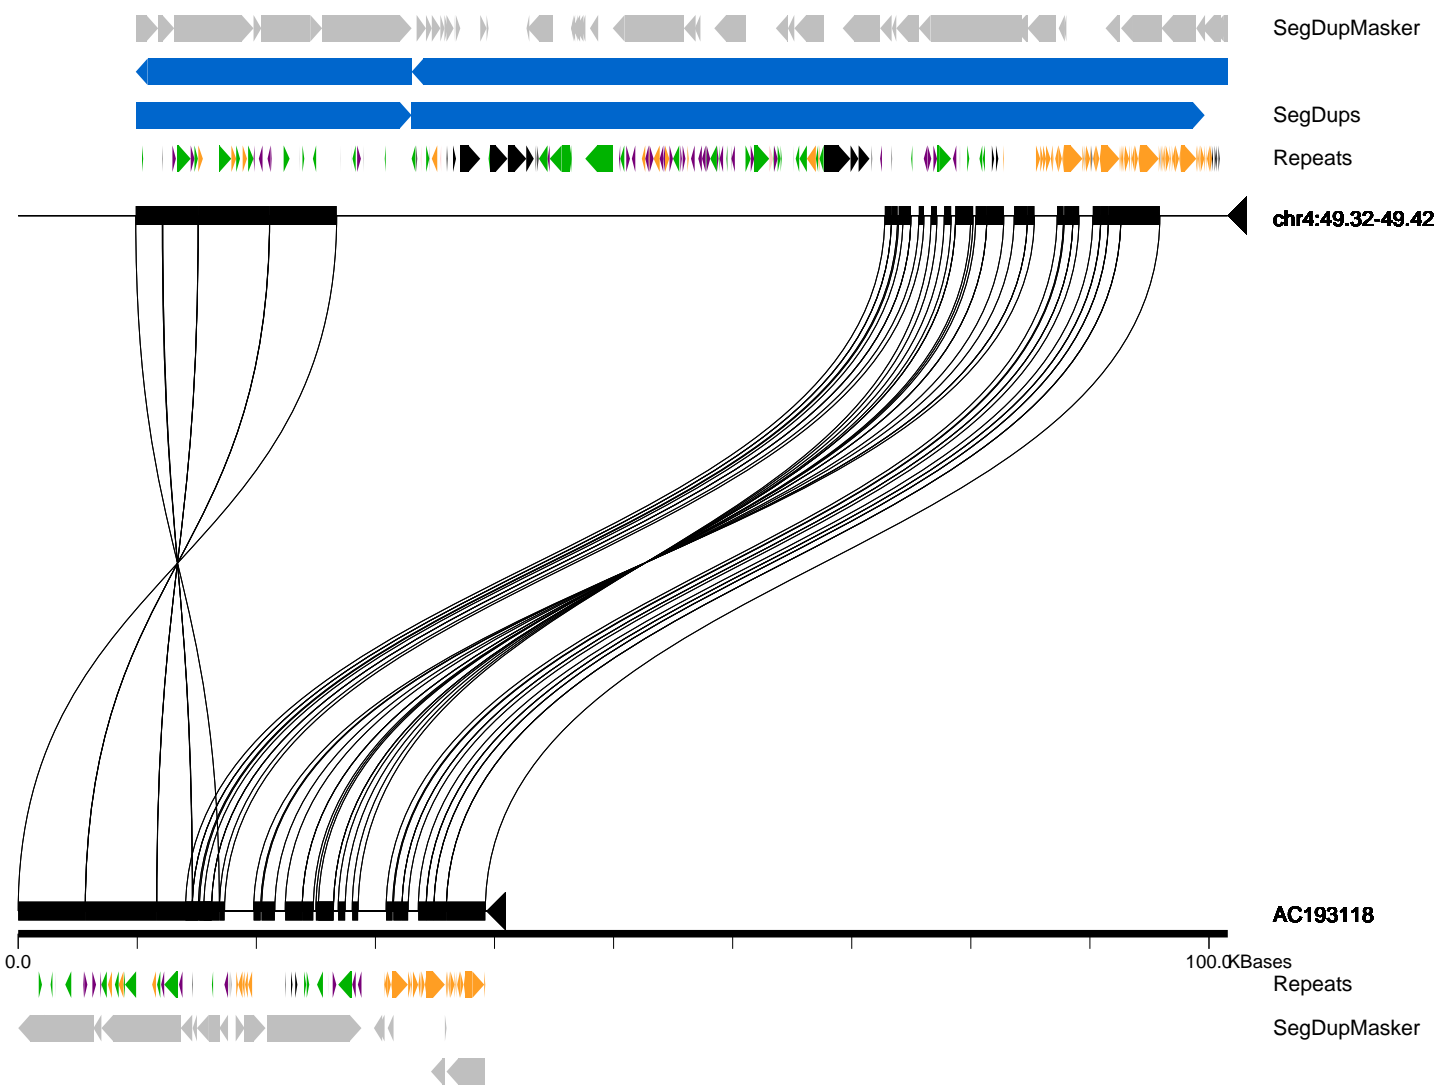

Clone: WIBR2-1173H05 Accession: AC195738

ESP Prediction: S Validation: I Mechanism: NAHR

Other Simple Repeat Low Complexity DNA LTR LINE SINE

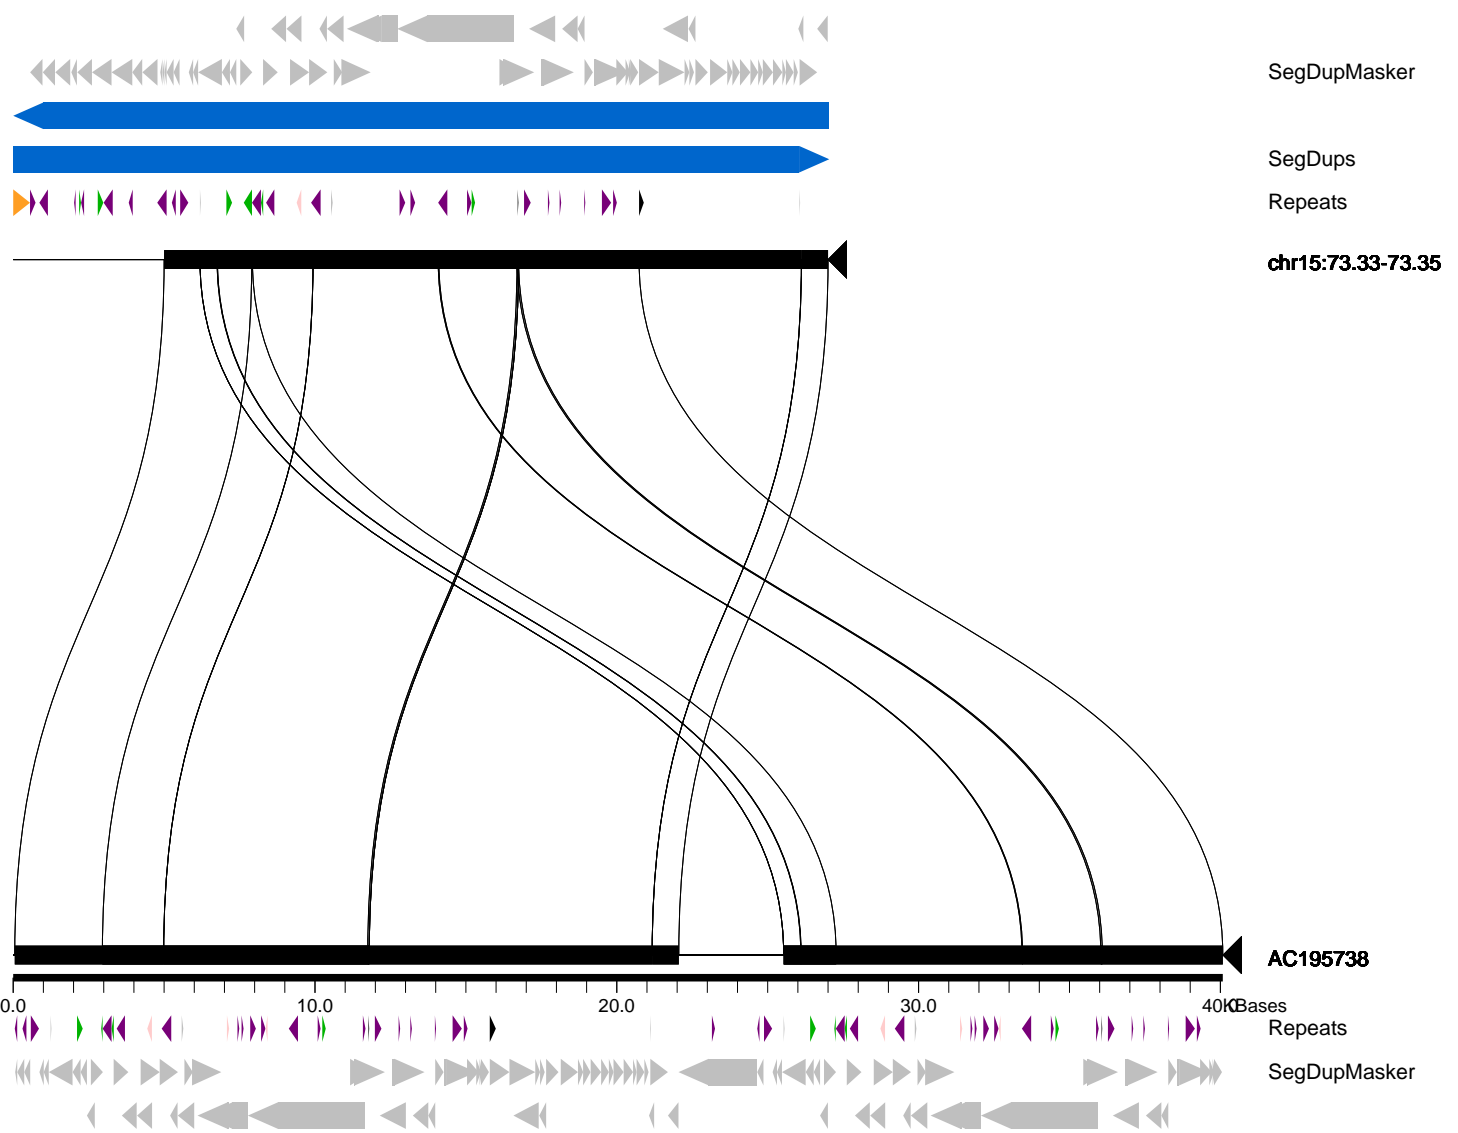

Clone: WIBR2-1161P13 Accession: AC196513

ESP Prediction: S Validation: I Mechanism: NAHR

Other Simple Repeat Low Complexity DNA LTR LINE SINE

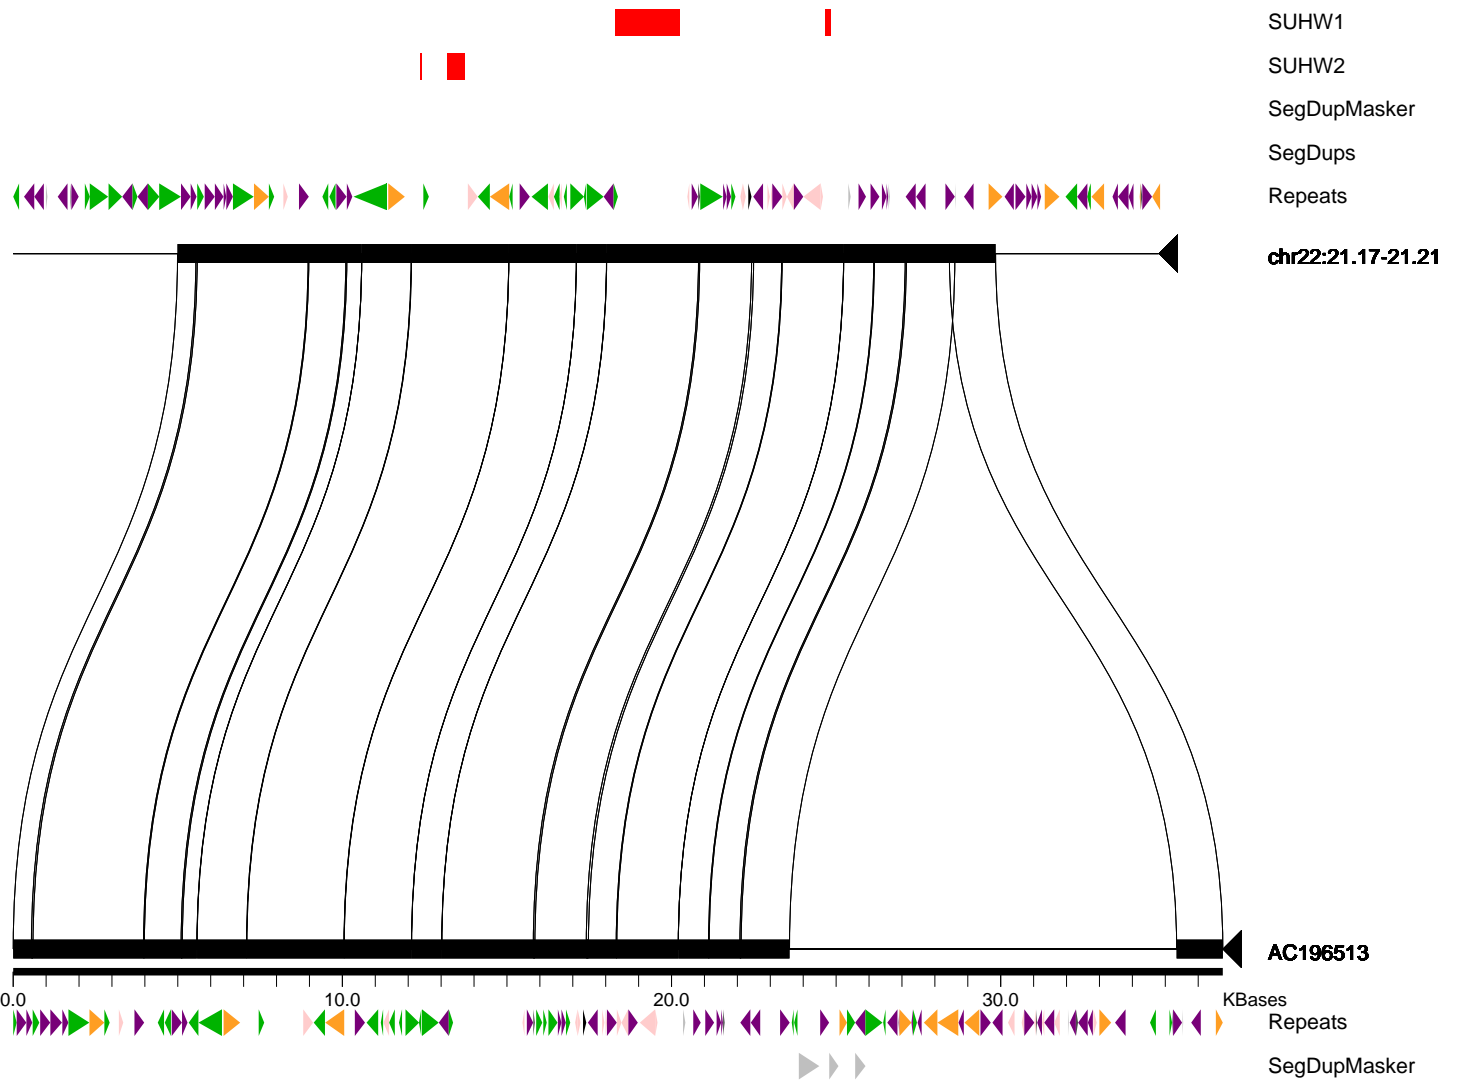



Clone: WIBR2-1856E05 Accession: AC196518

ESP Prediction: INV Validation: V Mechanism: NAHR

Other Simple Repeat Low Complexity DNA LTR LINE SINE

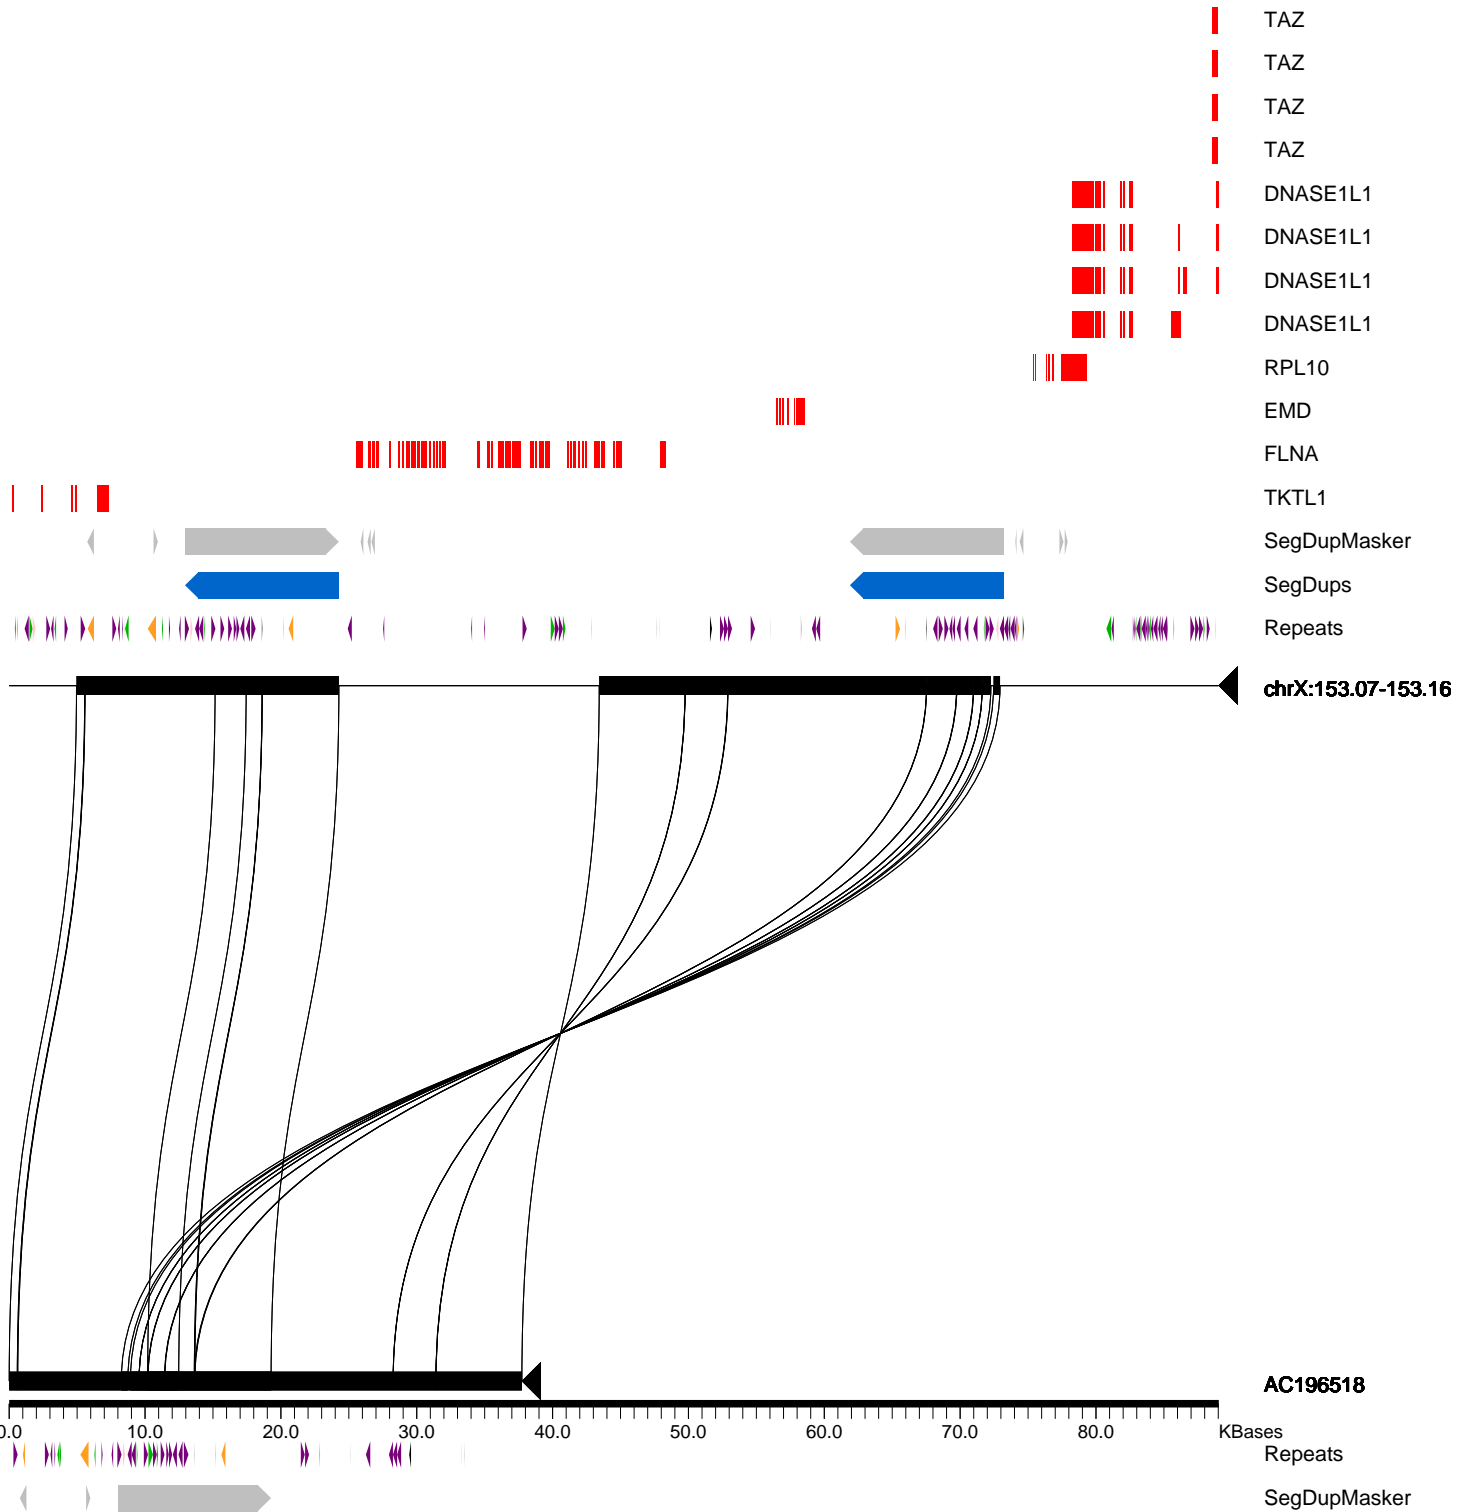

Clone: WIBR2-1441G05 Accession: AC193123

ESP Prediction: INV Validation: V Mechanism: NAHR

Other Simple Repeat Low Complexity DNA LTR LINE SINE

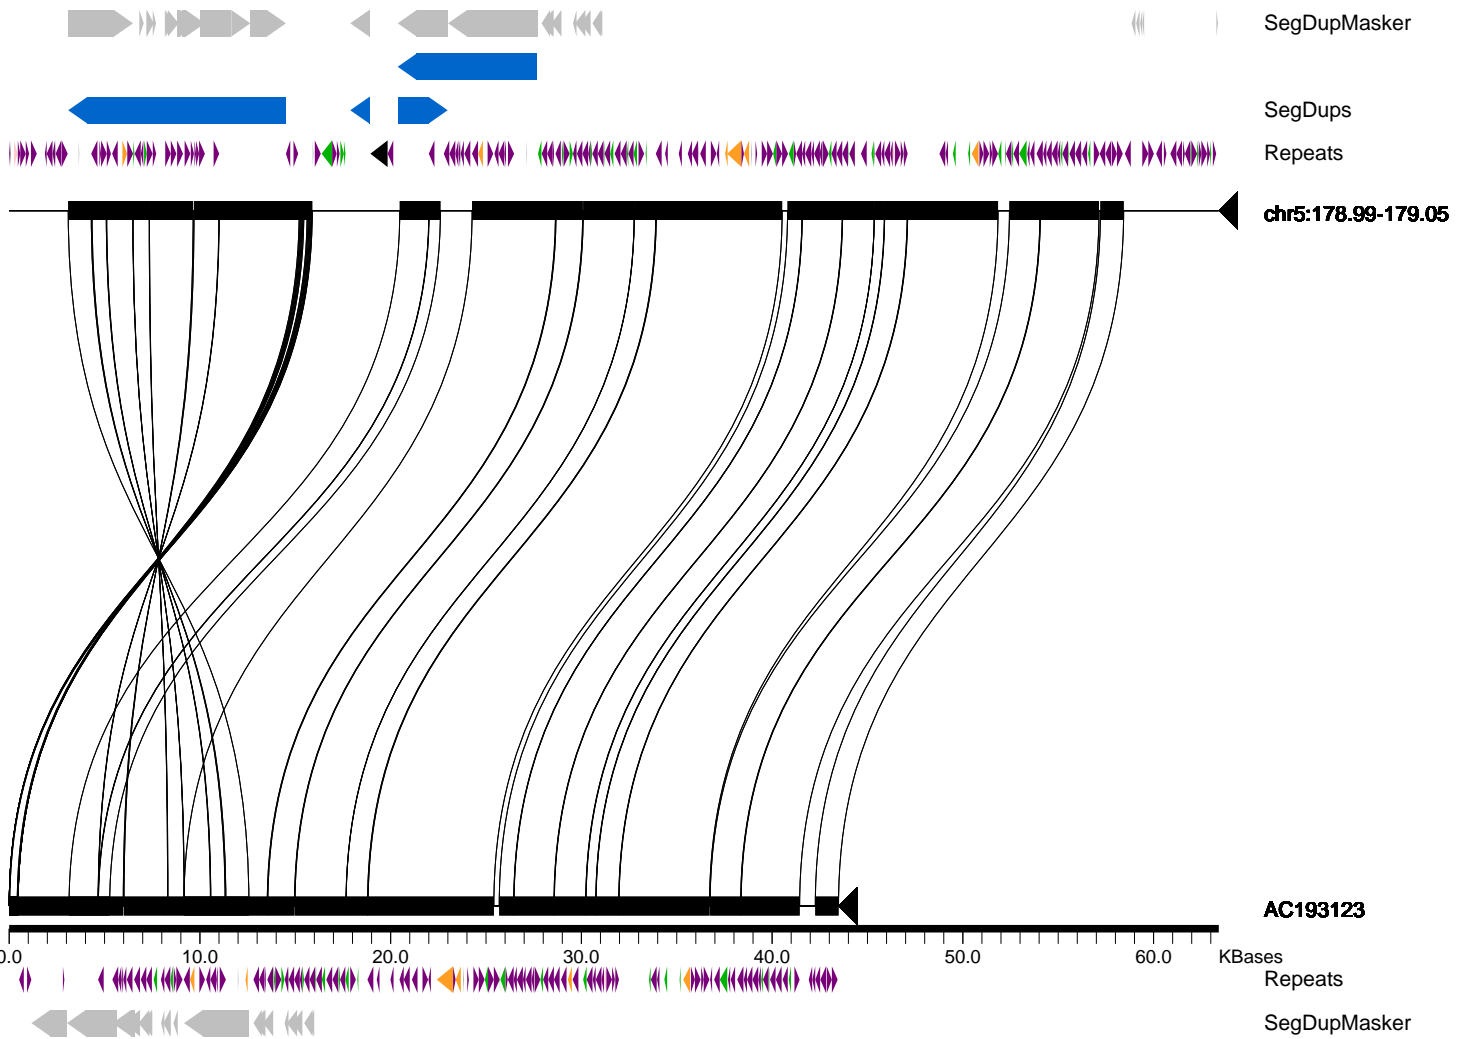

Clone: WIBR2-1948I16 Accession: AC193092

ESP Prediction: B Validation: D Mechanism: NAHR

Other Simple Repeat Low Complexity DNA LTR LINE SINE

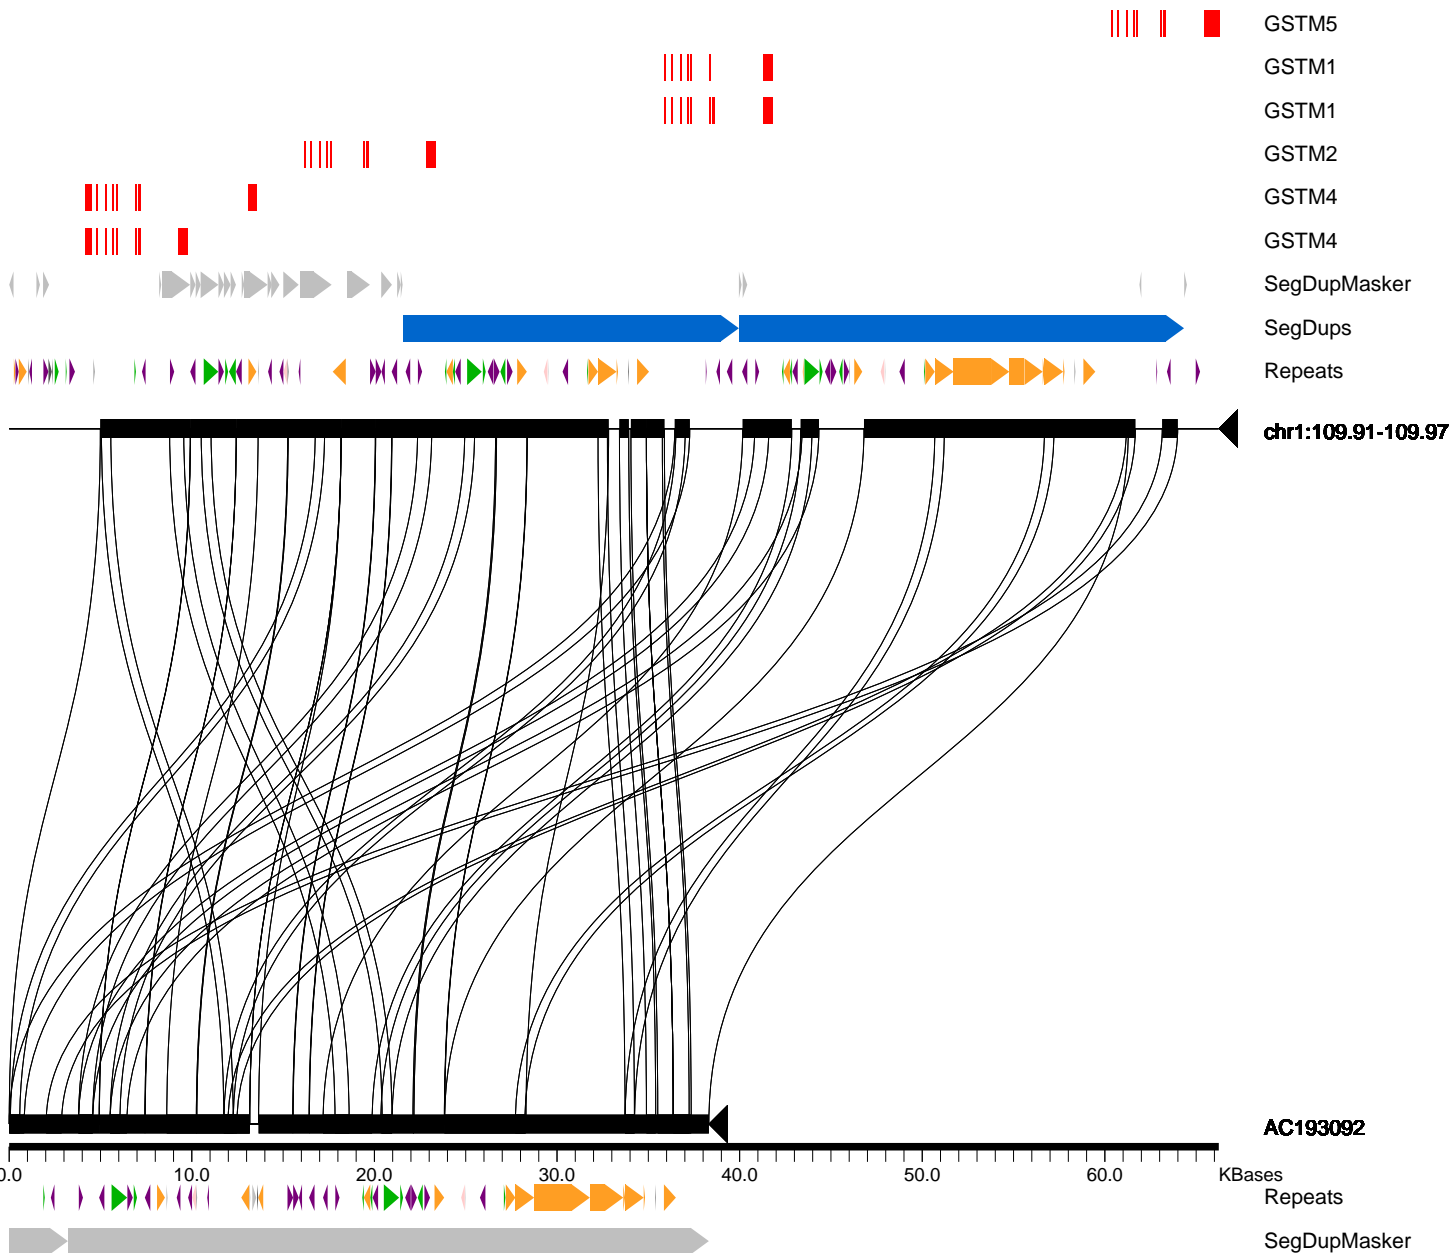

Clone: WIBR2-1797O04 Accession: AC193129

ESP Prediction: INV Validation: VI Mechanism: NAHR

Other Simple Repeat Low Complexity DNA LTR LINE SINE

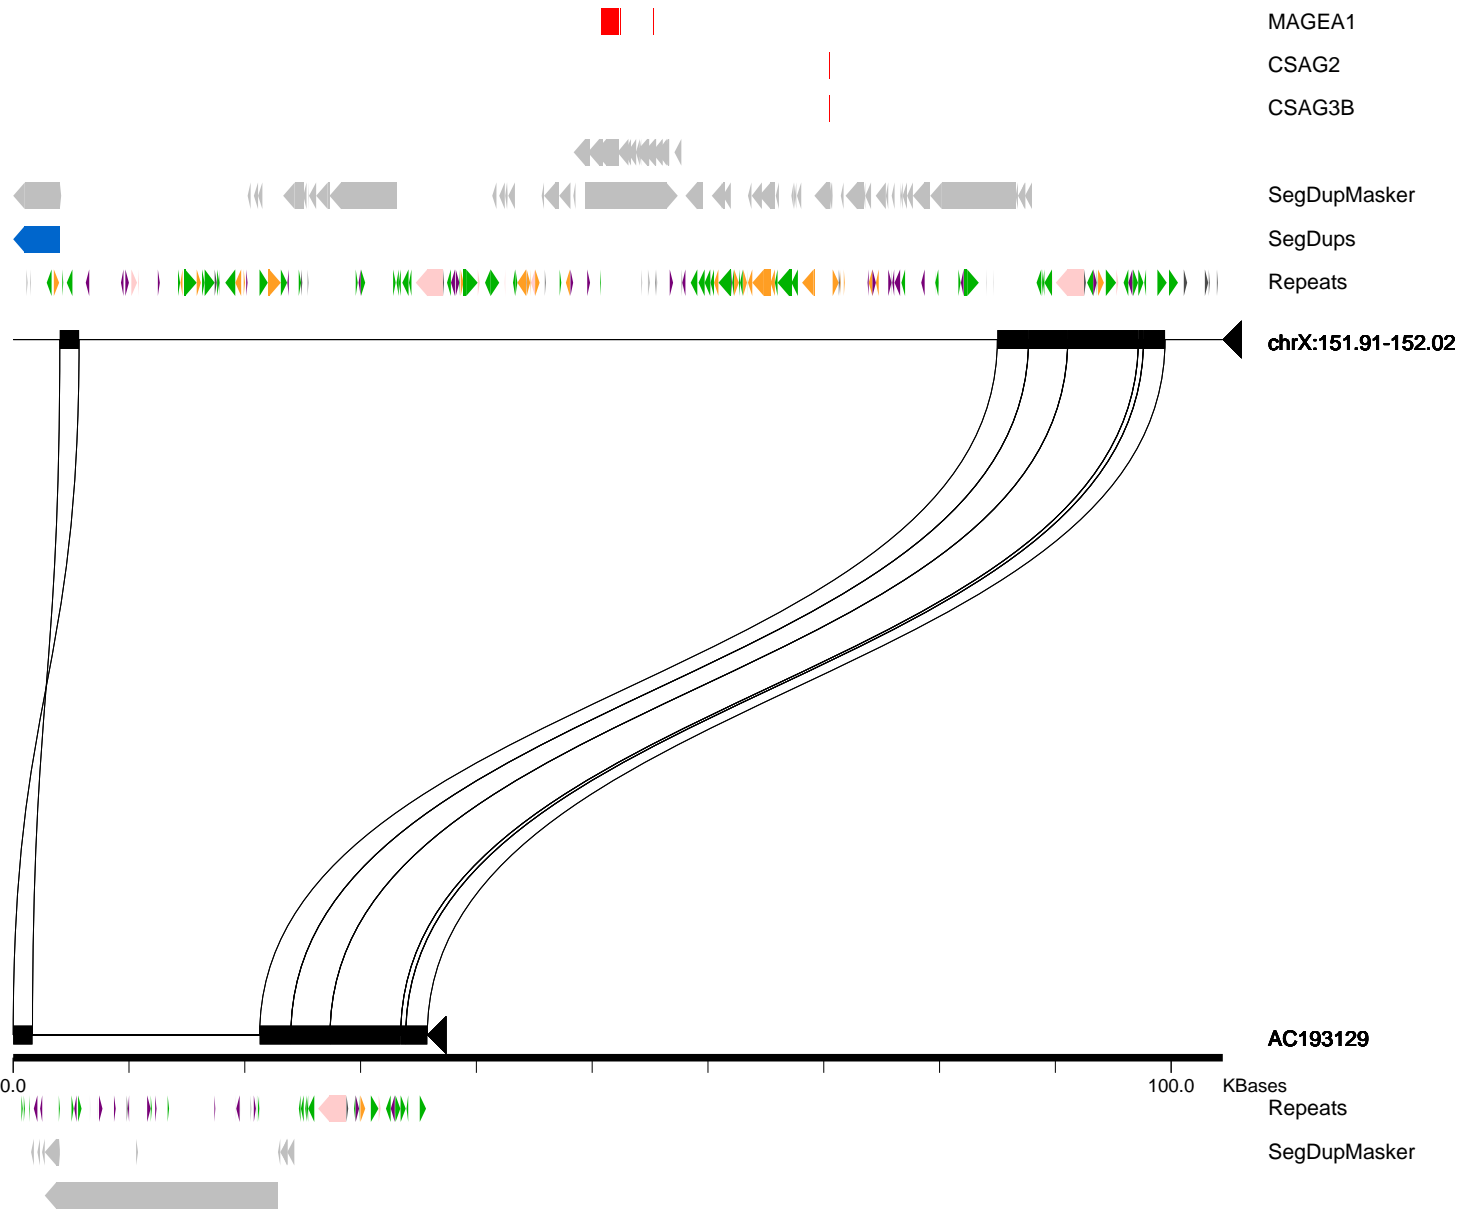

Clone: WIBR2-2074G15 Accession: AC193132

ESP Prediction: S Validation: I Mechanism: NAHR

Other Simple Repeat Low Complexity DNA LTR LINE SINE

SegDupMasker

SegDups

Repeats

chr17:68.36-68.39

AC193132

KBases

Repeats

SegDupMasker

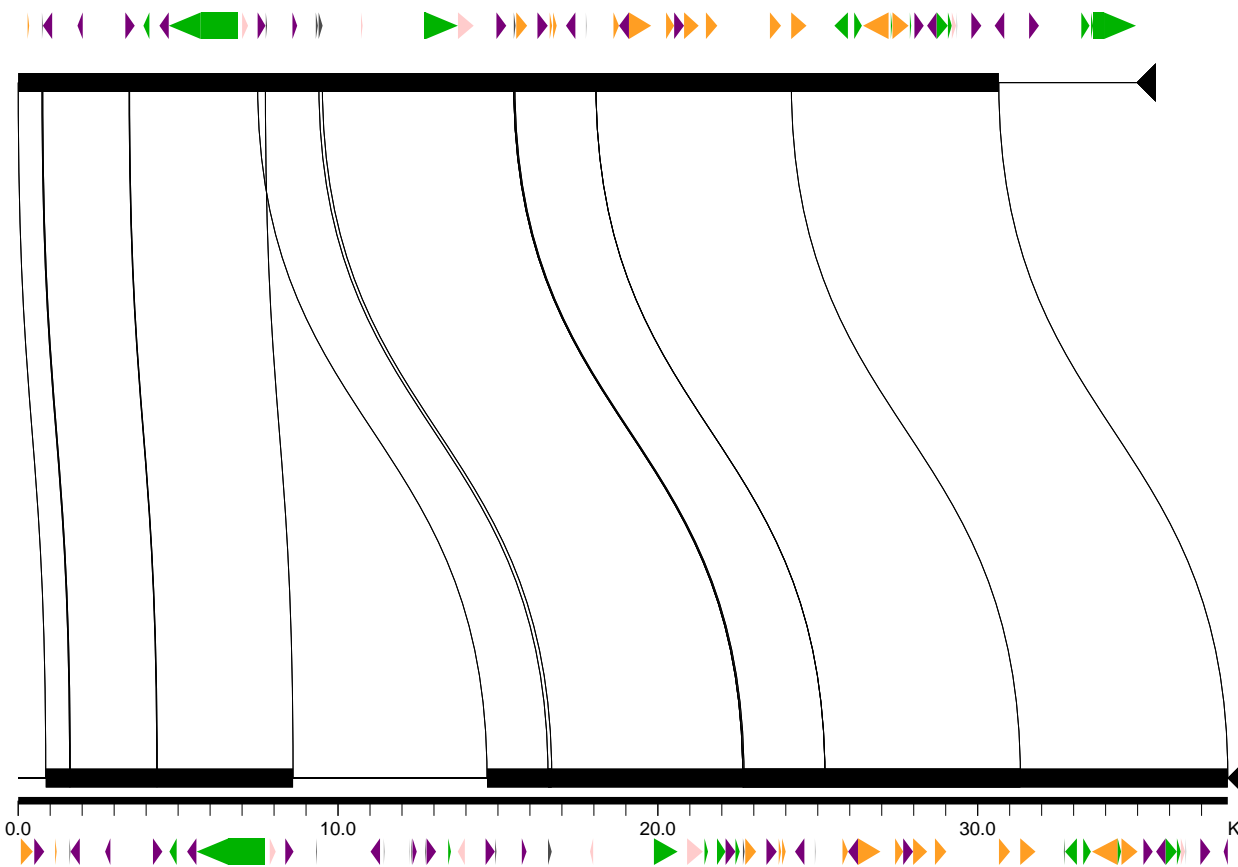

Clone: WIBR2-2019E16 Accession: AC153476

ESP Prediction: B Validation: D Mechanism: NAHR

Other Simple Repeat Low Complexity DNA LTR LINE SINE

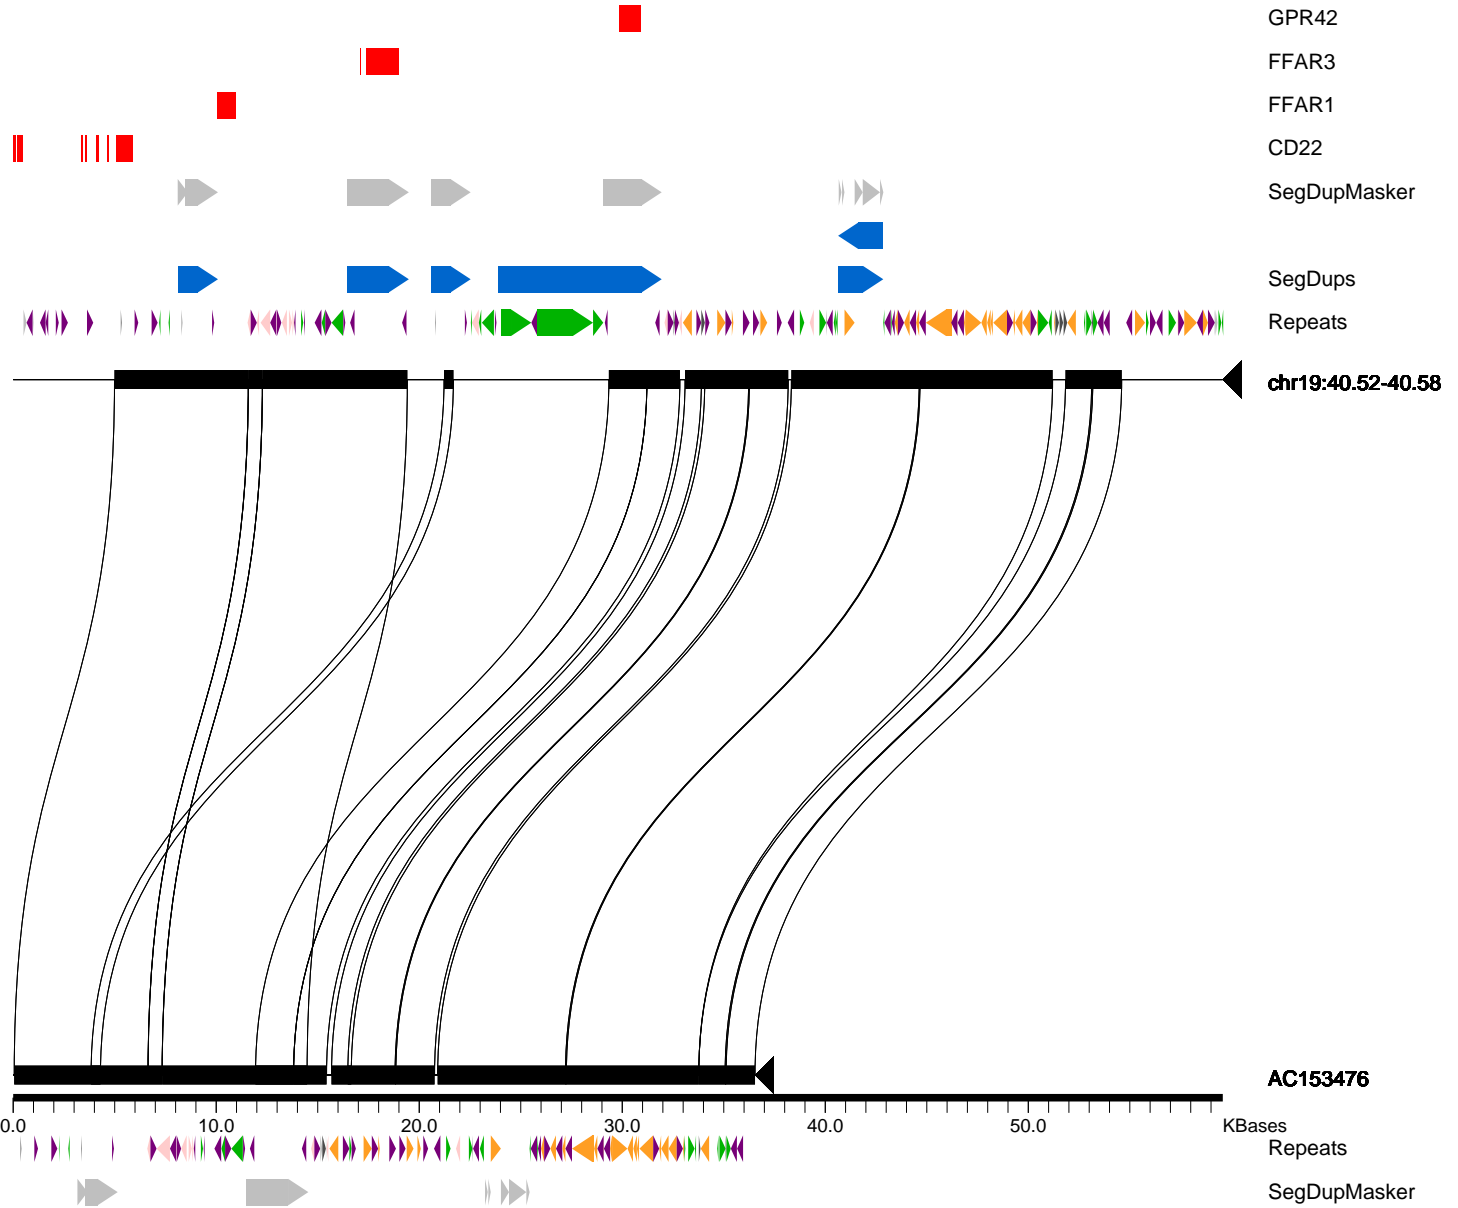

Clone: WIBR2-1705G14 Accession: AC196517

ESP Prediction: INV Validation: V Mechanism: NAHR

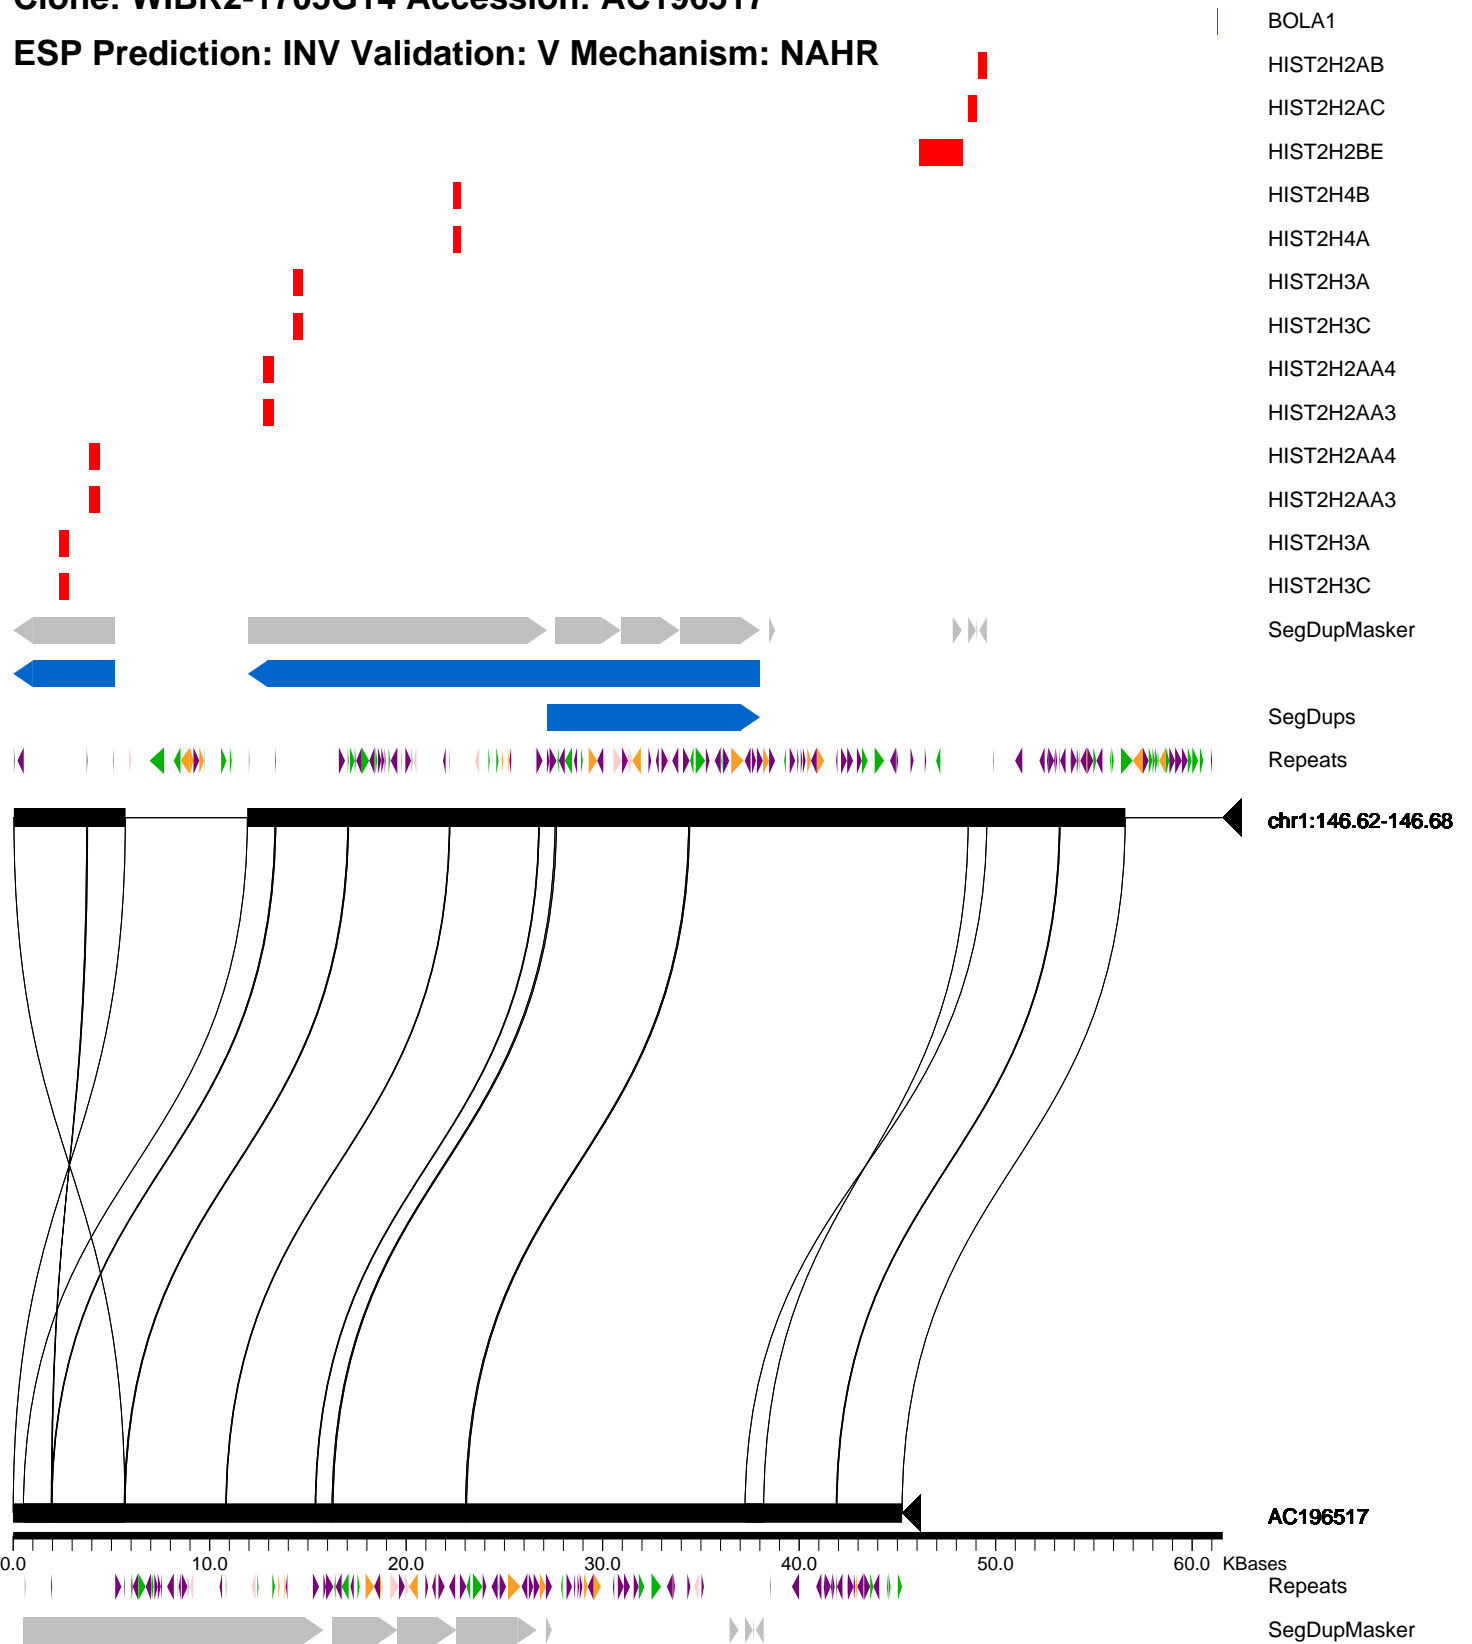

Clone: WIBR2-2195O07 Accession: AC193134

ESP Prediction: S Validation: I Mechanism: NAHR?

Other Simple Repeat Low Complexity DNA LTR LINE SINE

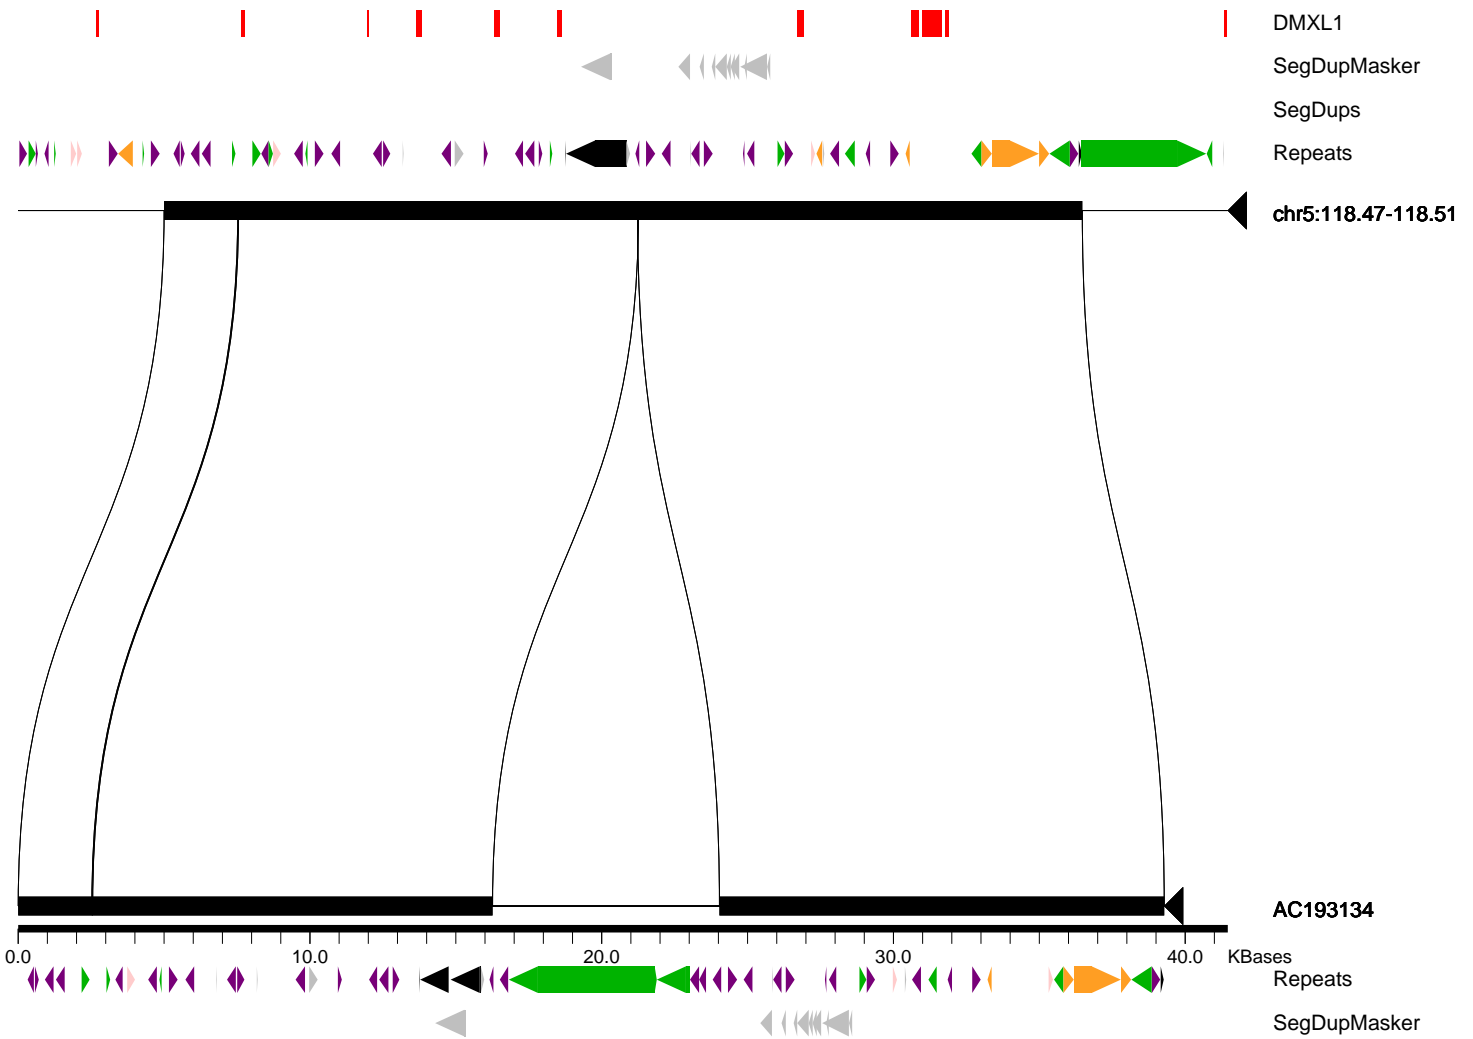



Clone: WIBR2-1900N07 Accession: AC196519

ESP Prediction: INV Validation: V Mechanism: NAHR

Other Simple Repeat Low Complexity DNA LTR LINE SINE

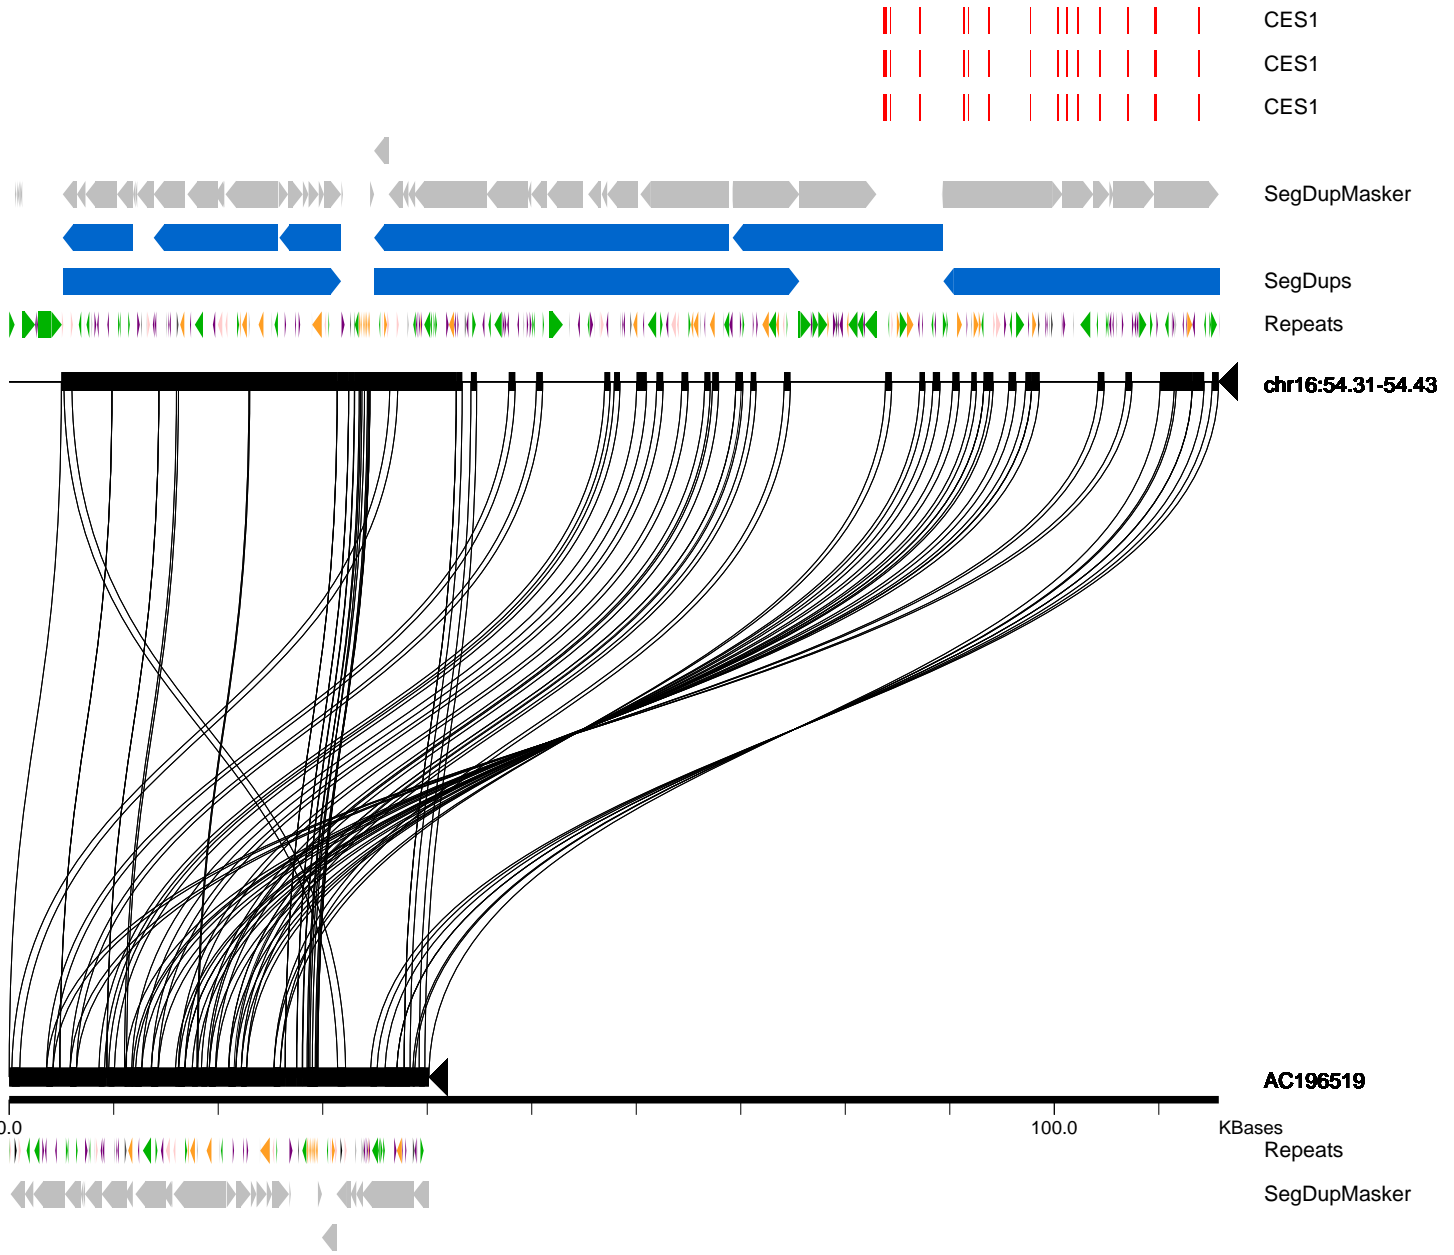

Clone: WIBR2-2169N17 Accession: AC158325

ESP Prediction: B Validation: D Mechanism: NAHR

Other Simple Repeat Low Complexity DNA LTR LINE SINE

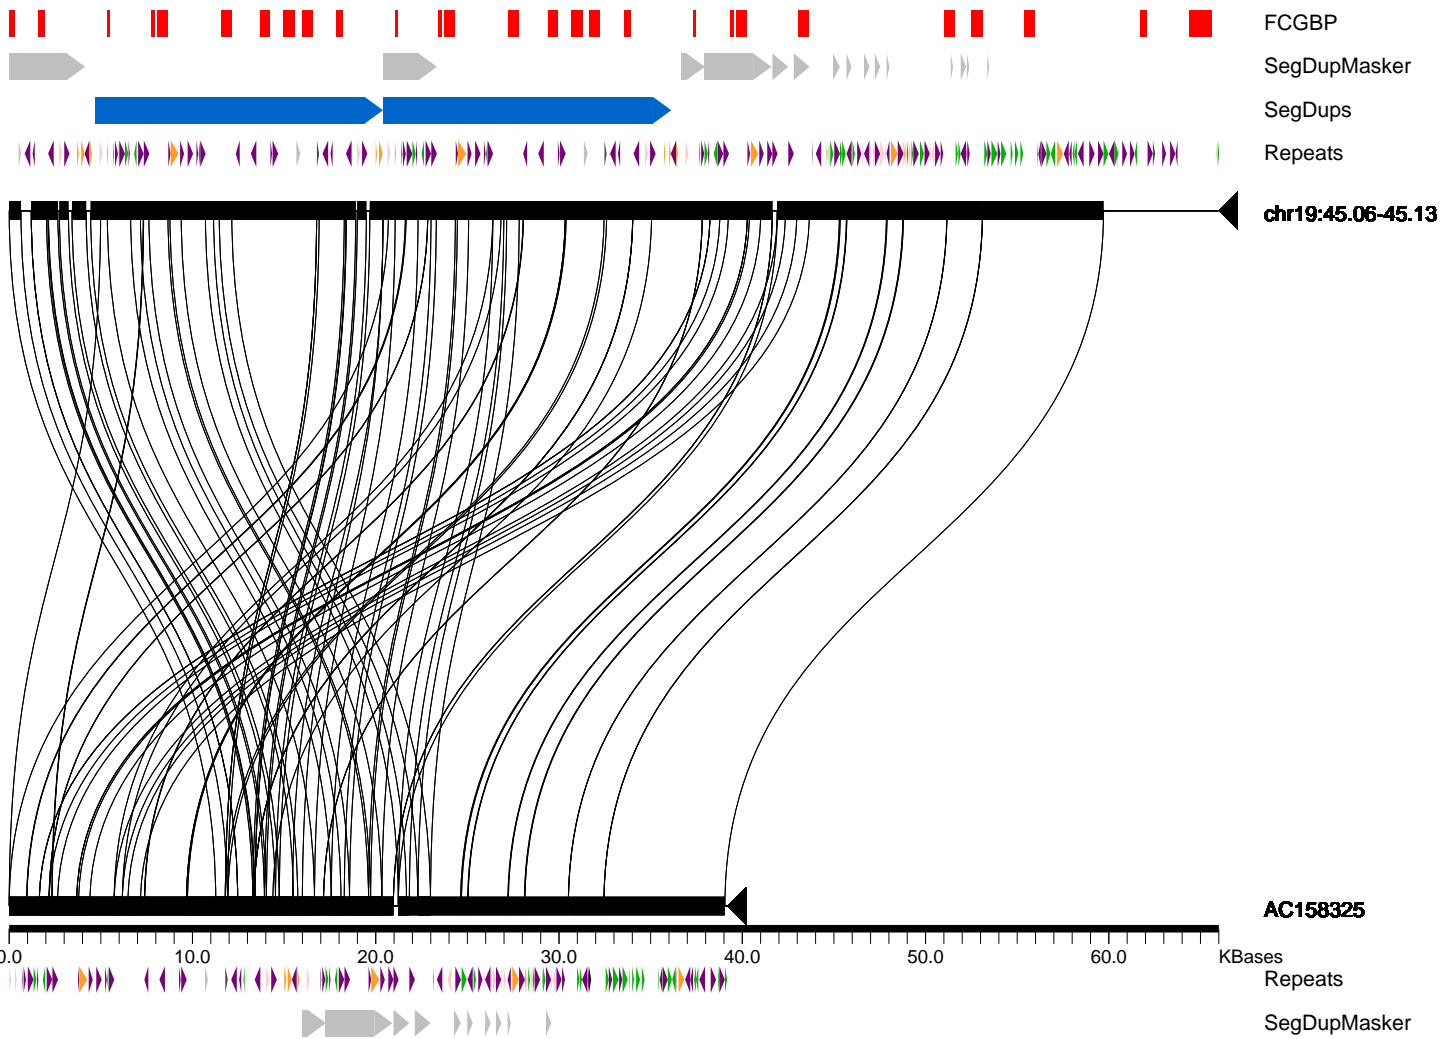

Clone: WIBR2-3543G13 Accession: AC193103

ESP Prediction: B Validation: D Mechanism: NAHR

Other Simple Repeat Low Complexity DNA LTR LINE SINE

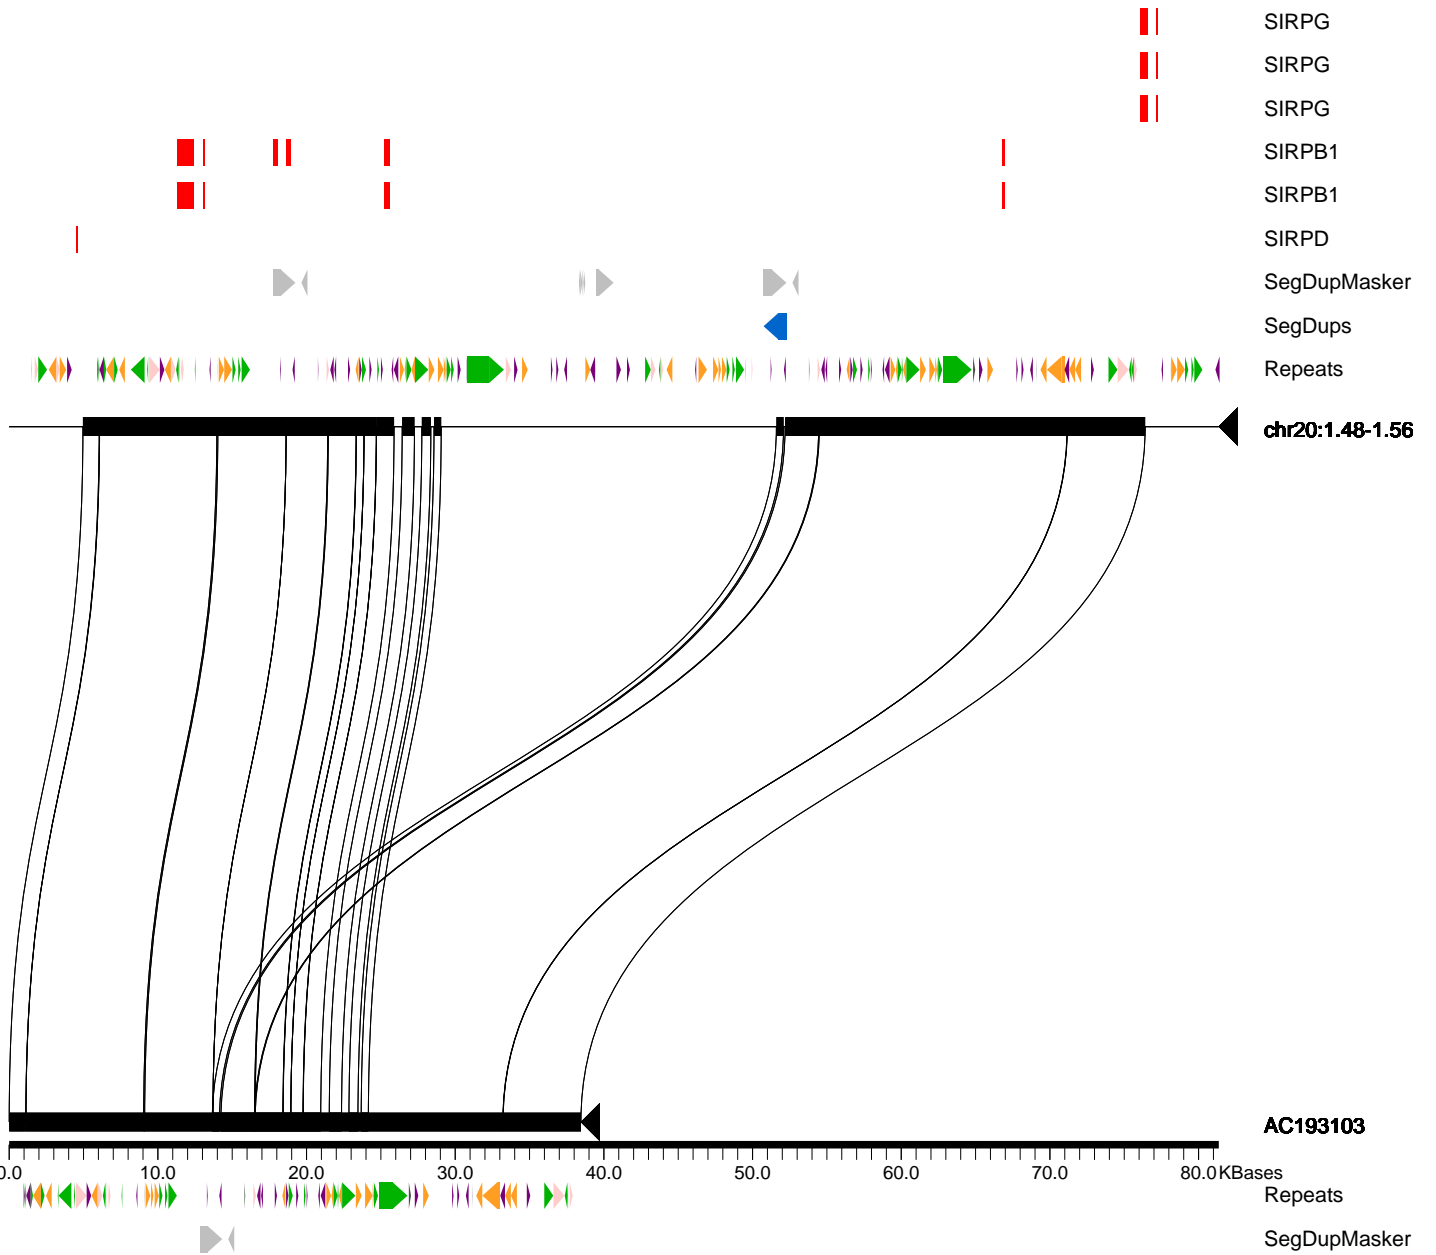

Clone: WIBR2-2238L20 Accession: AC193135

ESP Prediction: S Validation: I Mechanism: NAHR

Other Simple Repeat Low Complexity DNA LTR LINE SINE

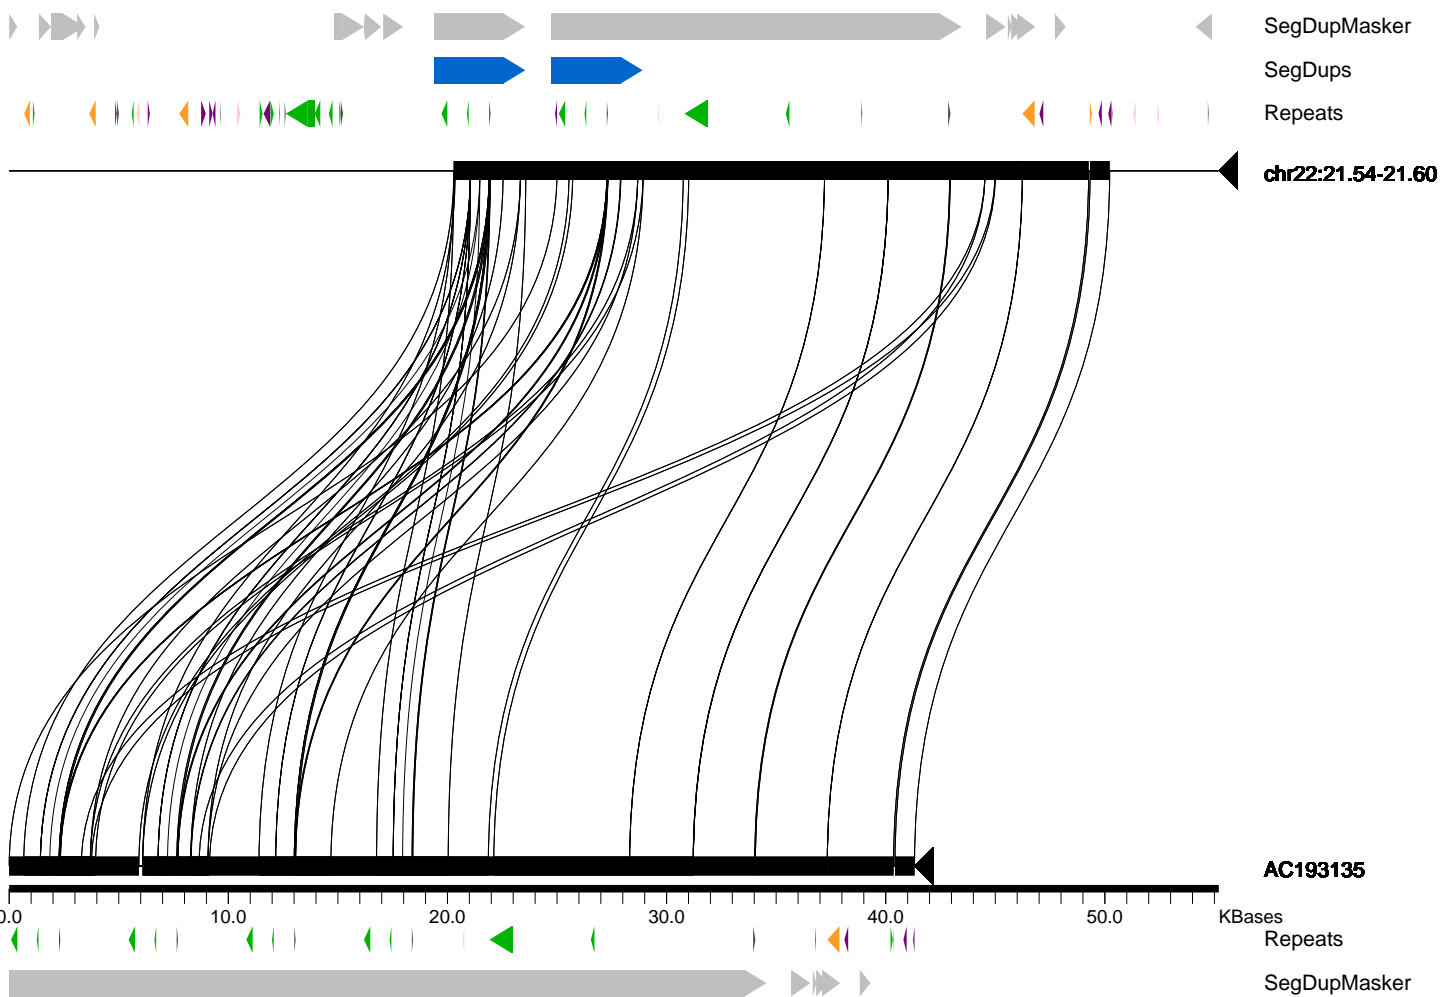

Clone: WIBR2-2123F05 Accession: AC193086

ESP Prediction: B Validation: D Mechanism: NAHR

Other Simple Repeat Low Complexity DNA LTR LINE SINE

SegDupMasker

SegDups

Repeats

chr12:82.10-82.16

AC193086

Repeats

SegDupMasker

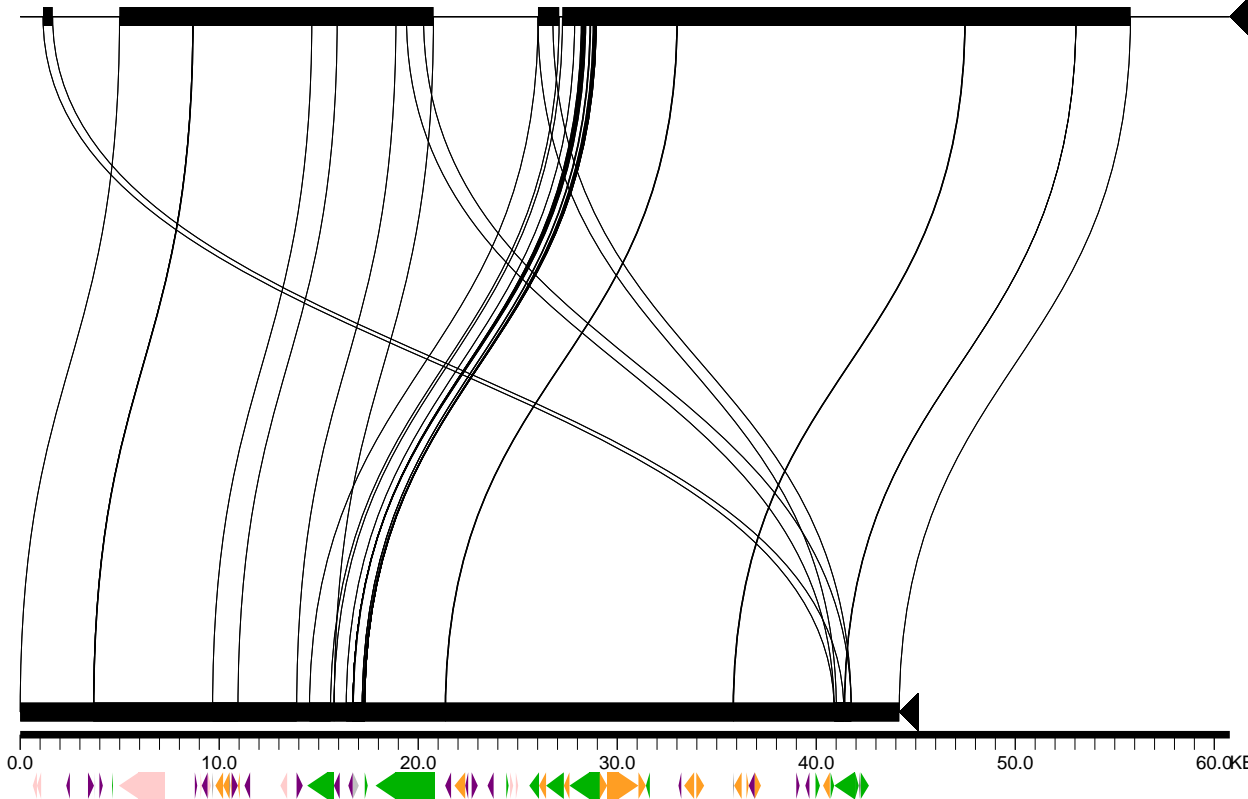

0.0 10.0 20.0 30.0 40.0 50.0 60.0KBases

Clone: WIBR2-2130N11 Accession: AC196525

ESP Prediction: B Validation: D Mechanism: NAHR

Other Simple Repeat Low Complexity DNA LTR LINE SINE

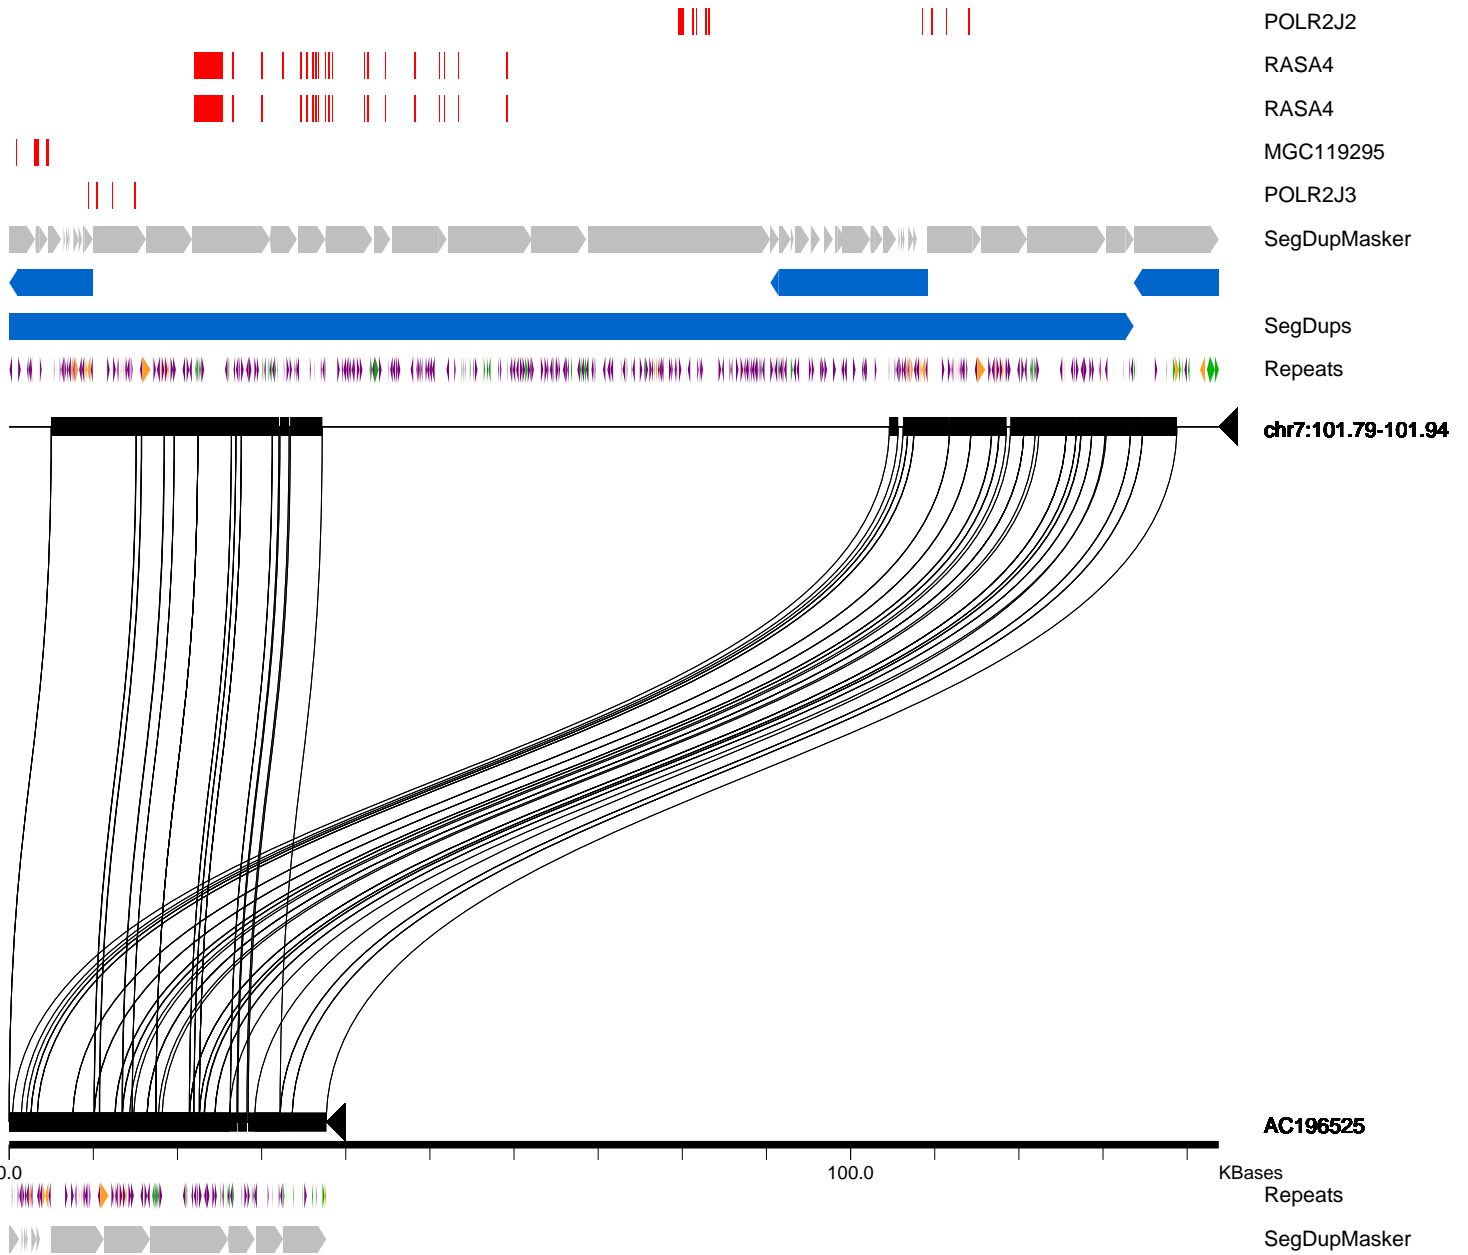

Clone: WIBR2-1701E24 Accession: AC193126

ESP Prediction: B Validation: D Mechanism: NAHR

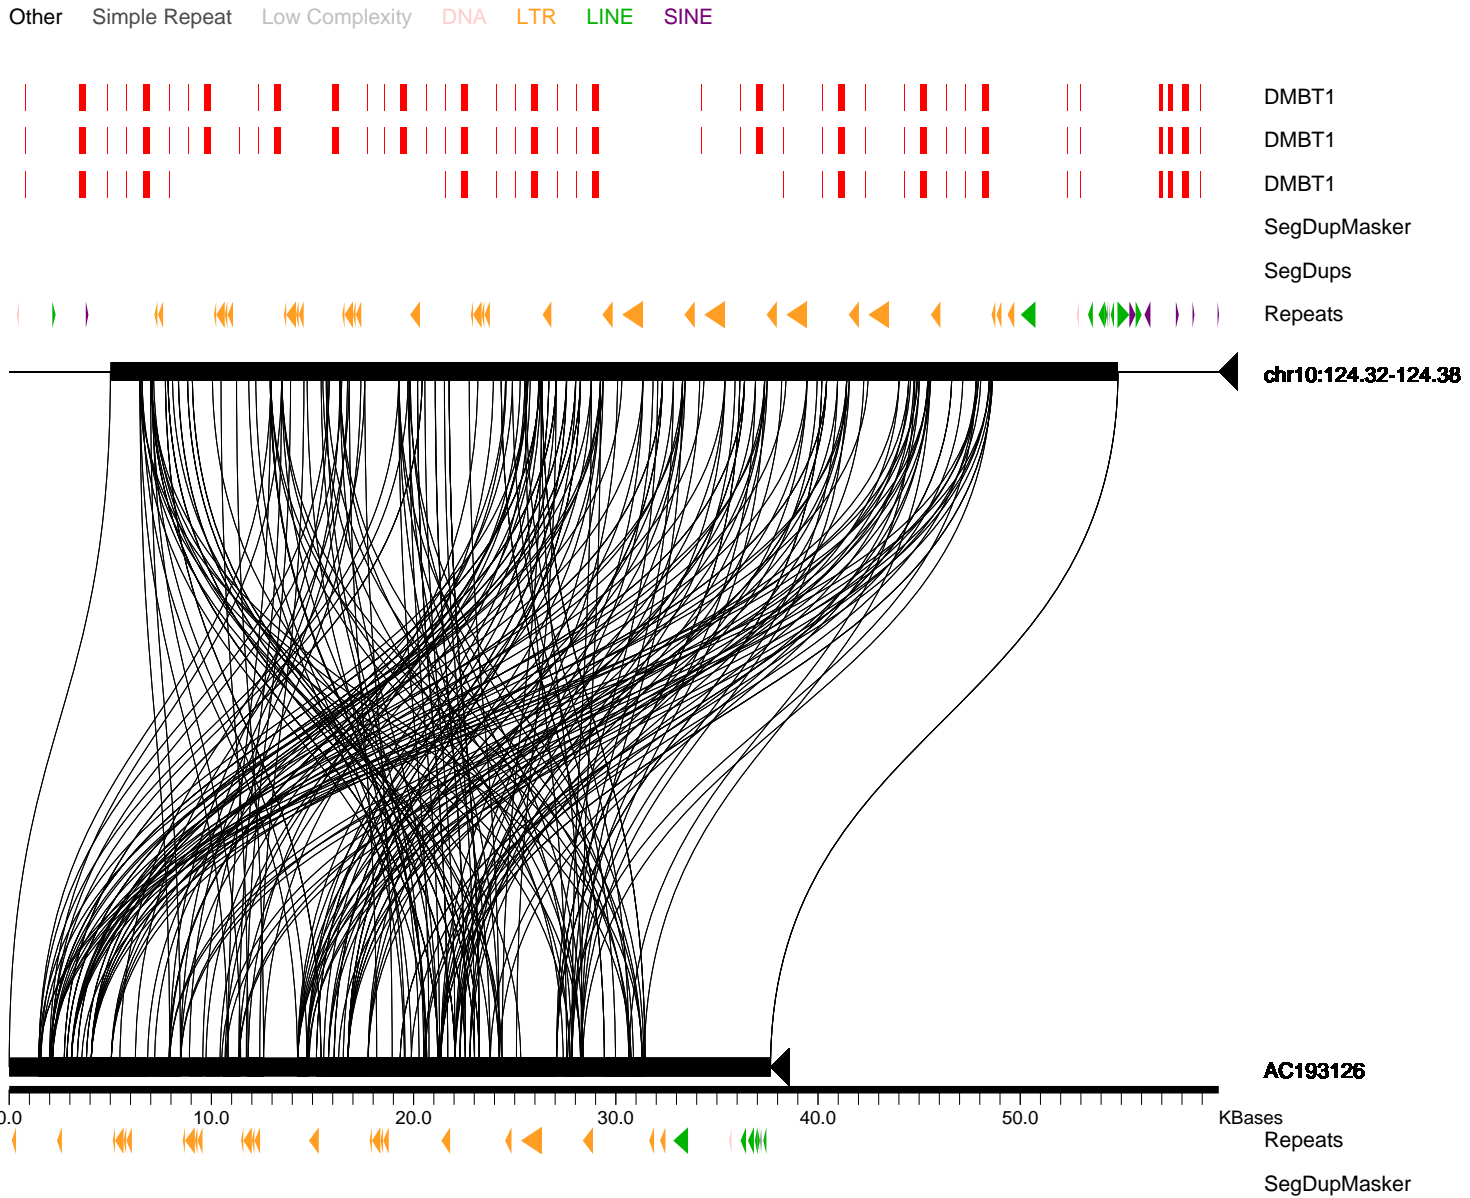

Clone: WIBR2-1689K15 Accession: AC195756

ESP Prediction: S Validation: U Mechanism: NAHR

Other Simple Repeat Low Complexity DNA LTR LINE SINE

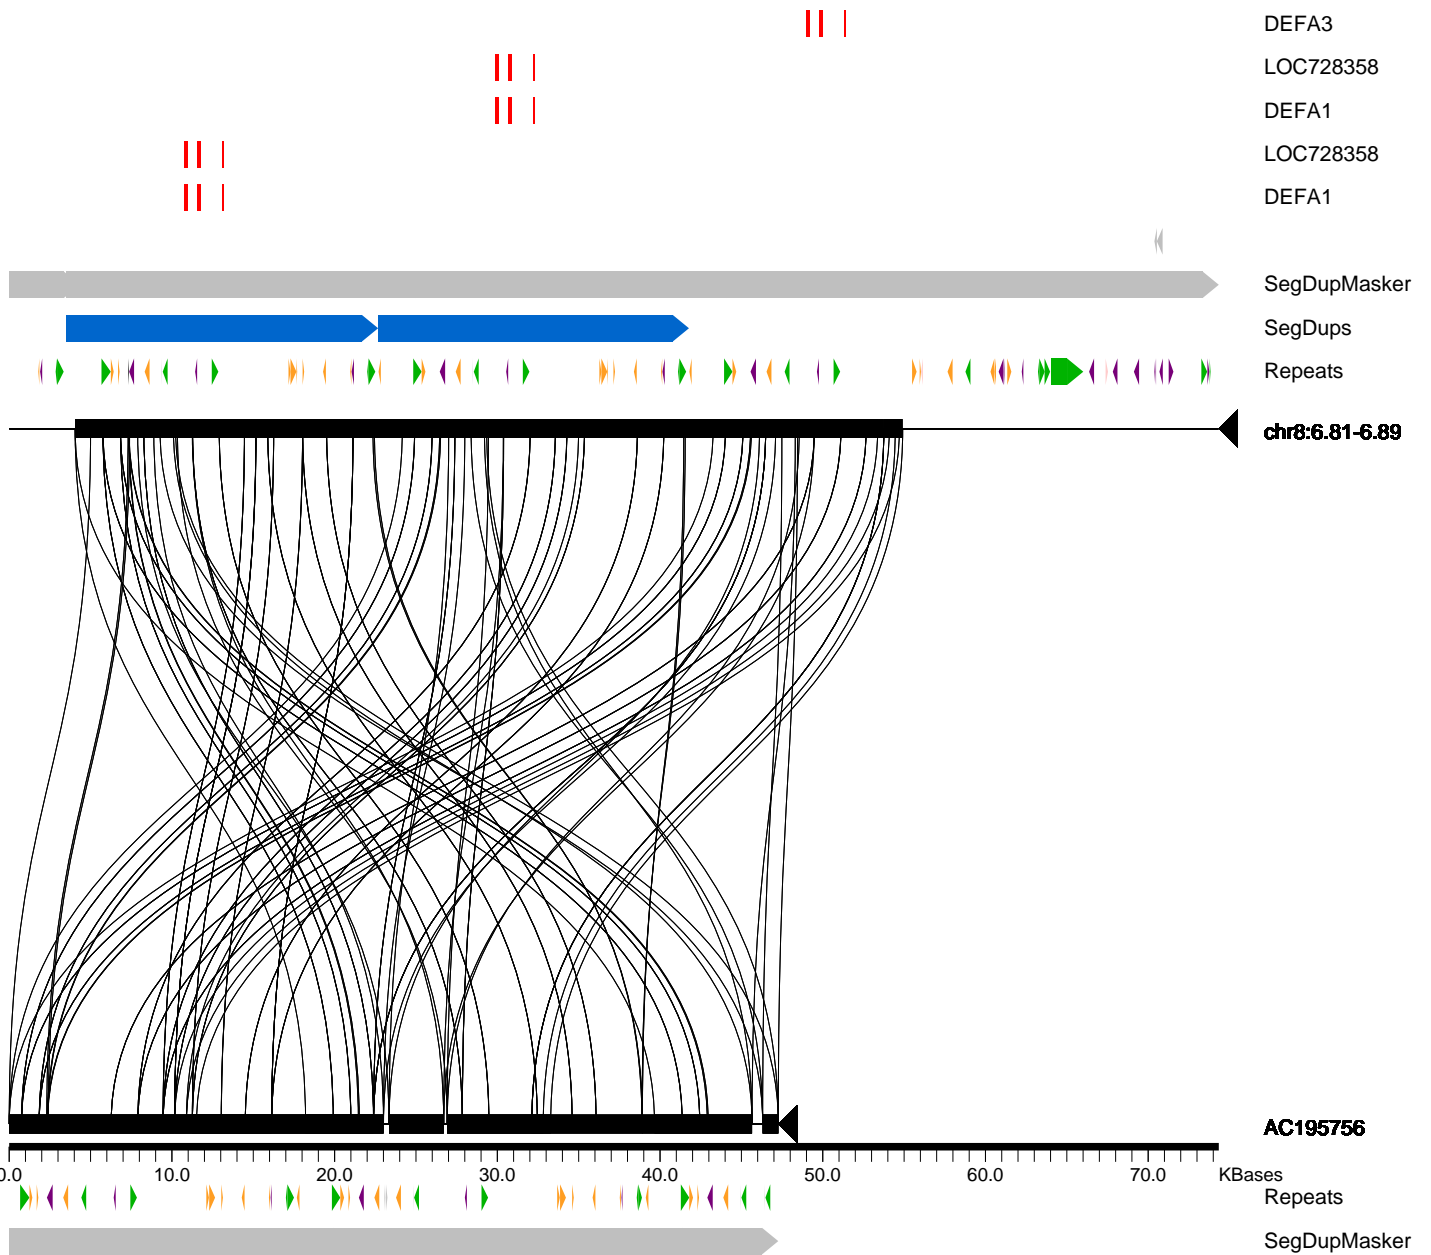



Clone: WIBR2-0577G06 Accession: AC195754

ESP Prediction: INV Validation: V Mechanism: NAHR

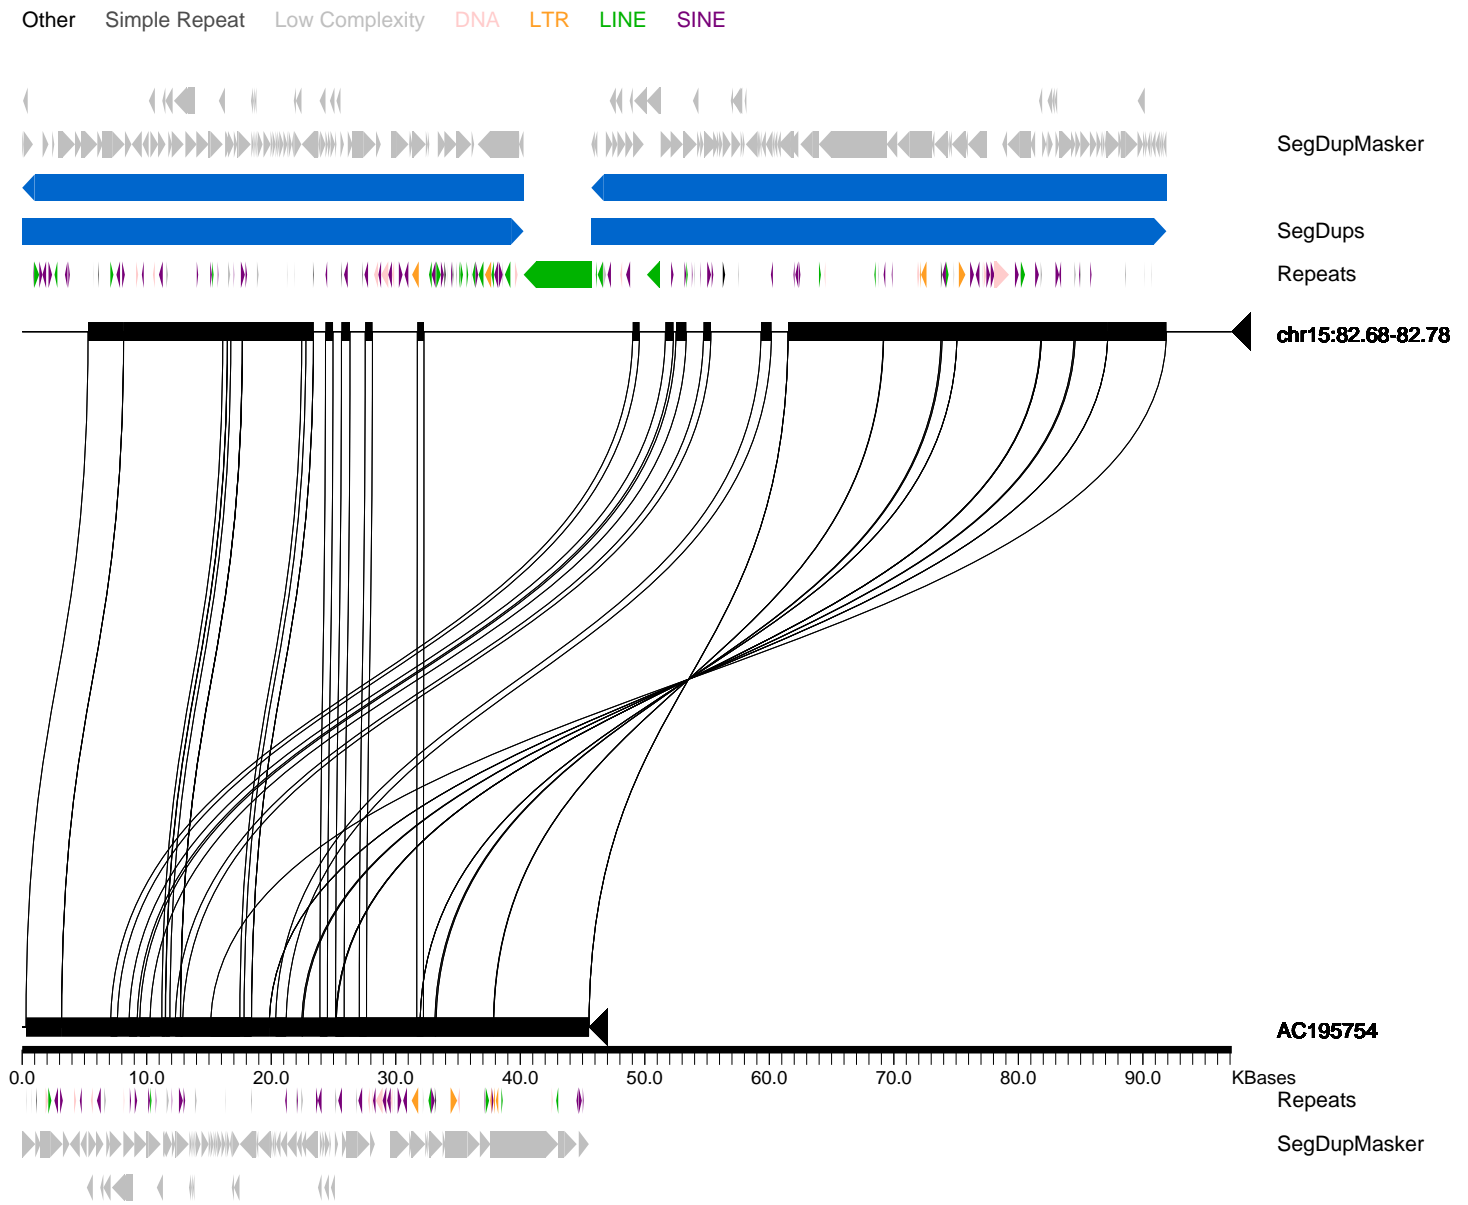

Clone: WIBR2-1749K02 Accession: AC153464

ESP Prediction: S Validation: I Mechanism: NAHR?

Other Simple Repeat Low Complexity DNA LTR LINE SINE

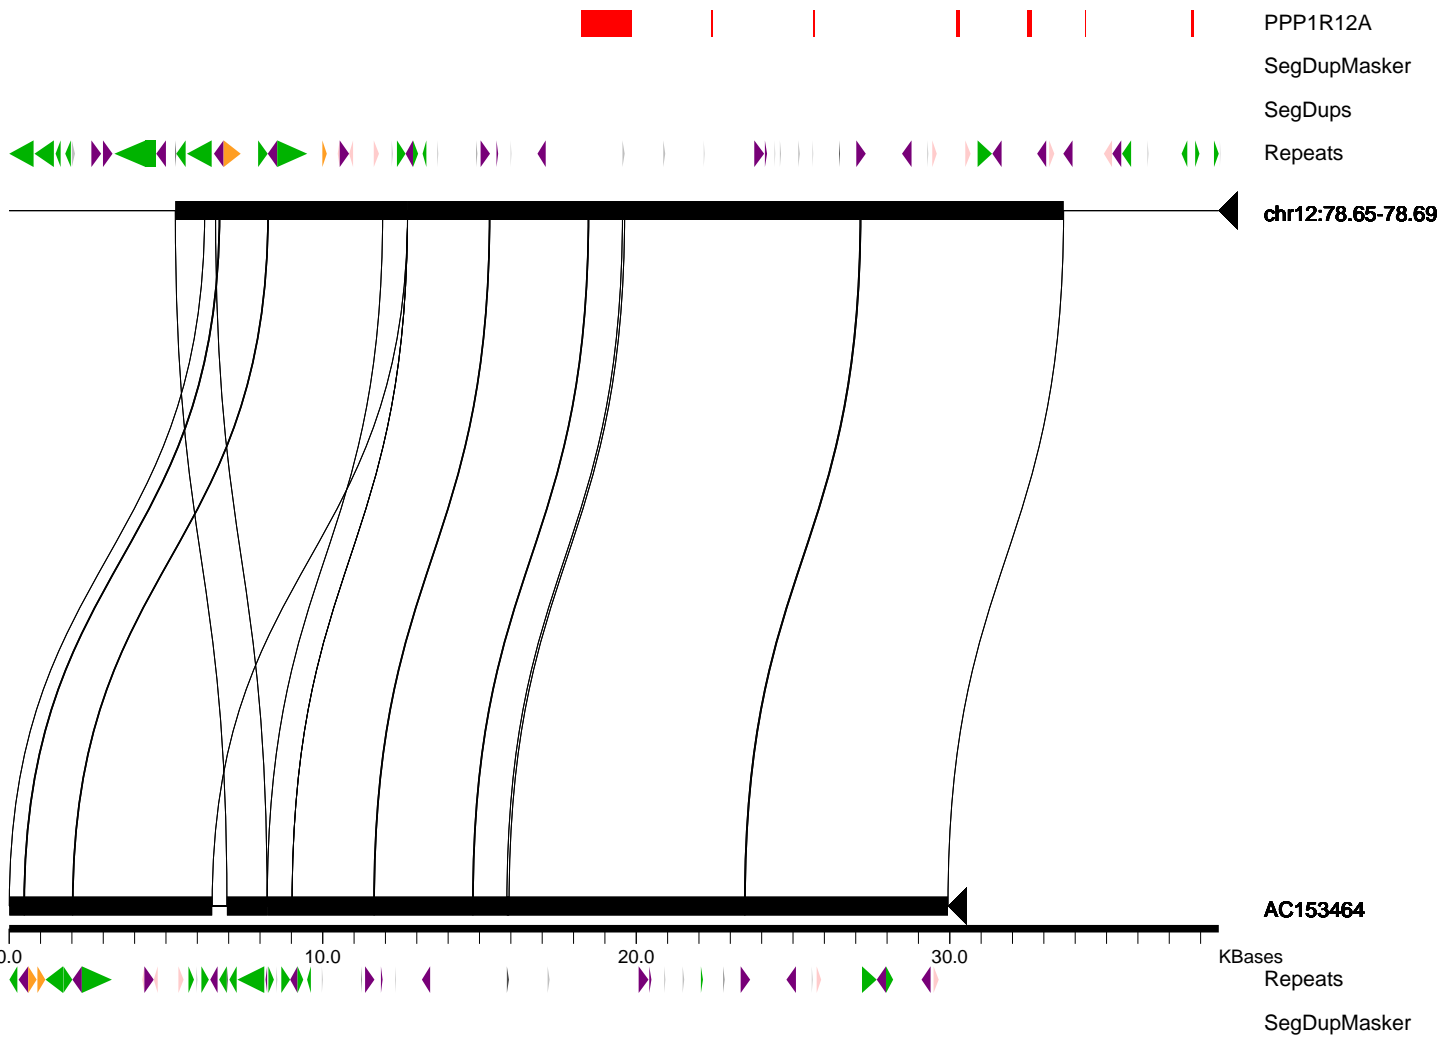

Clone: WIBR2-0578C19 Accession: AC195742

ESP Prediction: S Validation: I Mechanism: NAHR

Other Simple Repeat Low Complexity DNA LTR LINE SINE

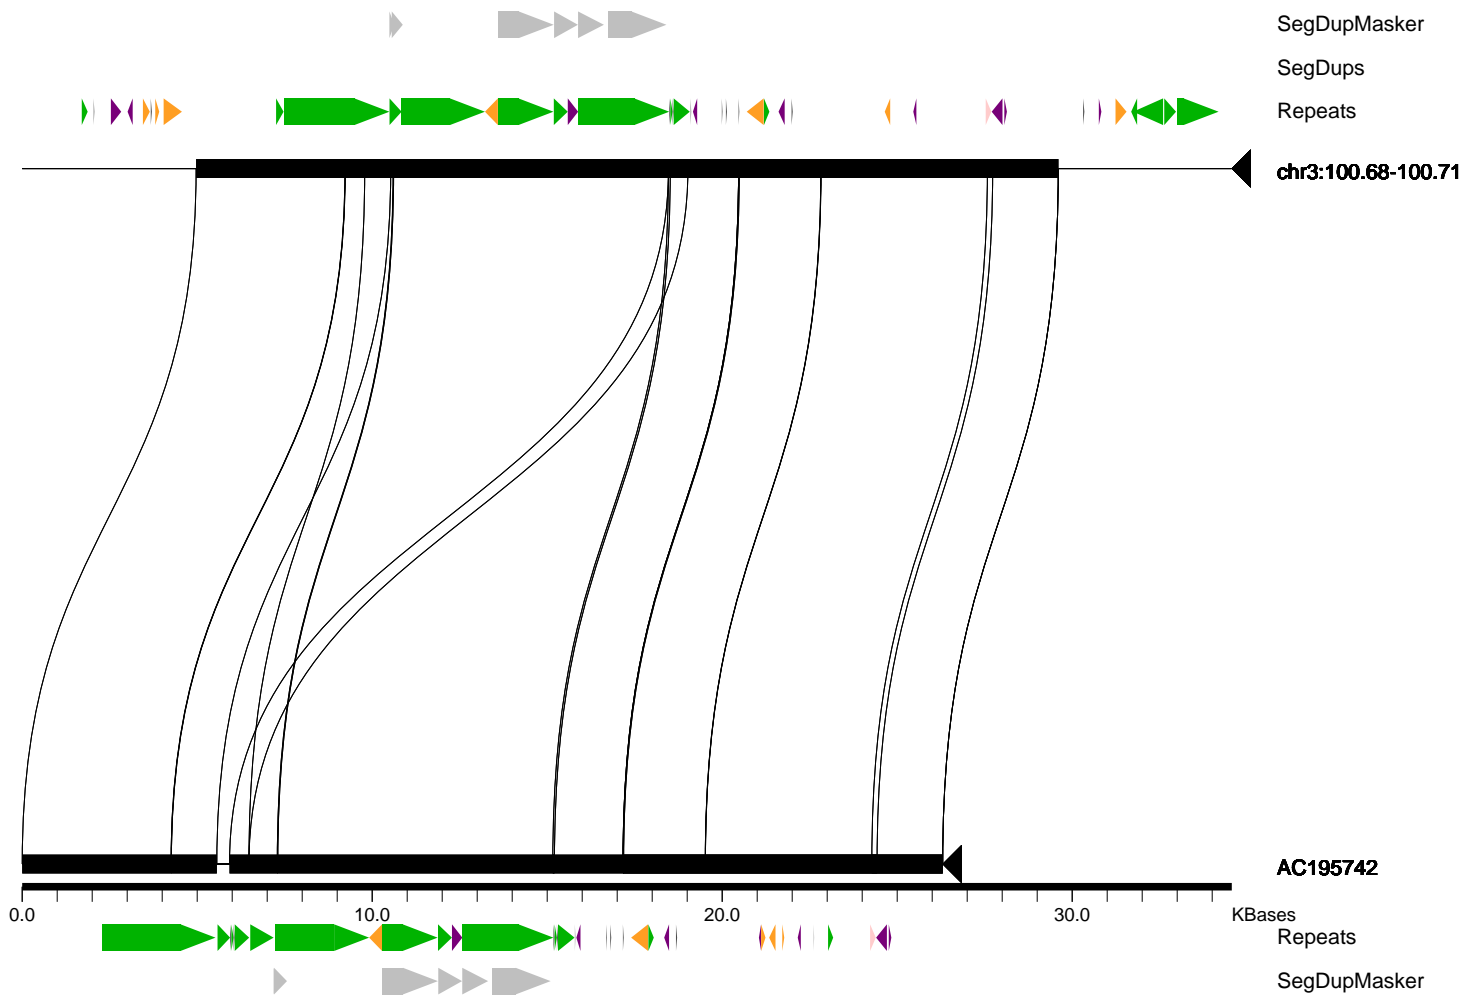

Clone: WIBR2-2273G16 Accession: AC193138

ESP Prediction: S Validation: I Mechanism: NAHR

Other Simple Repeat Low Complexity DNA LTR LINE SINE

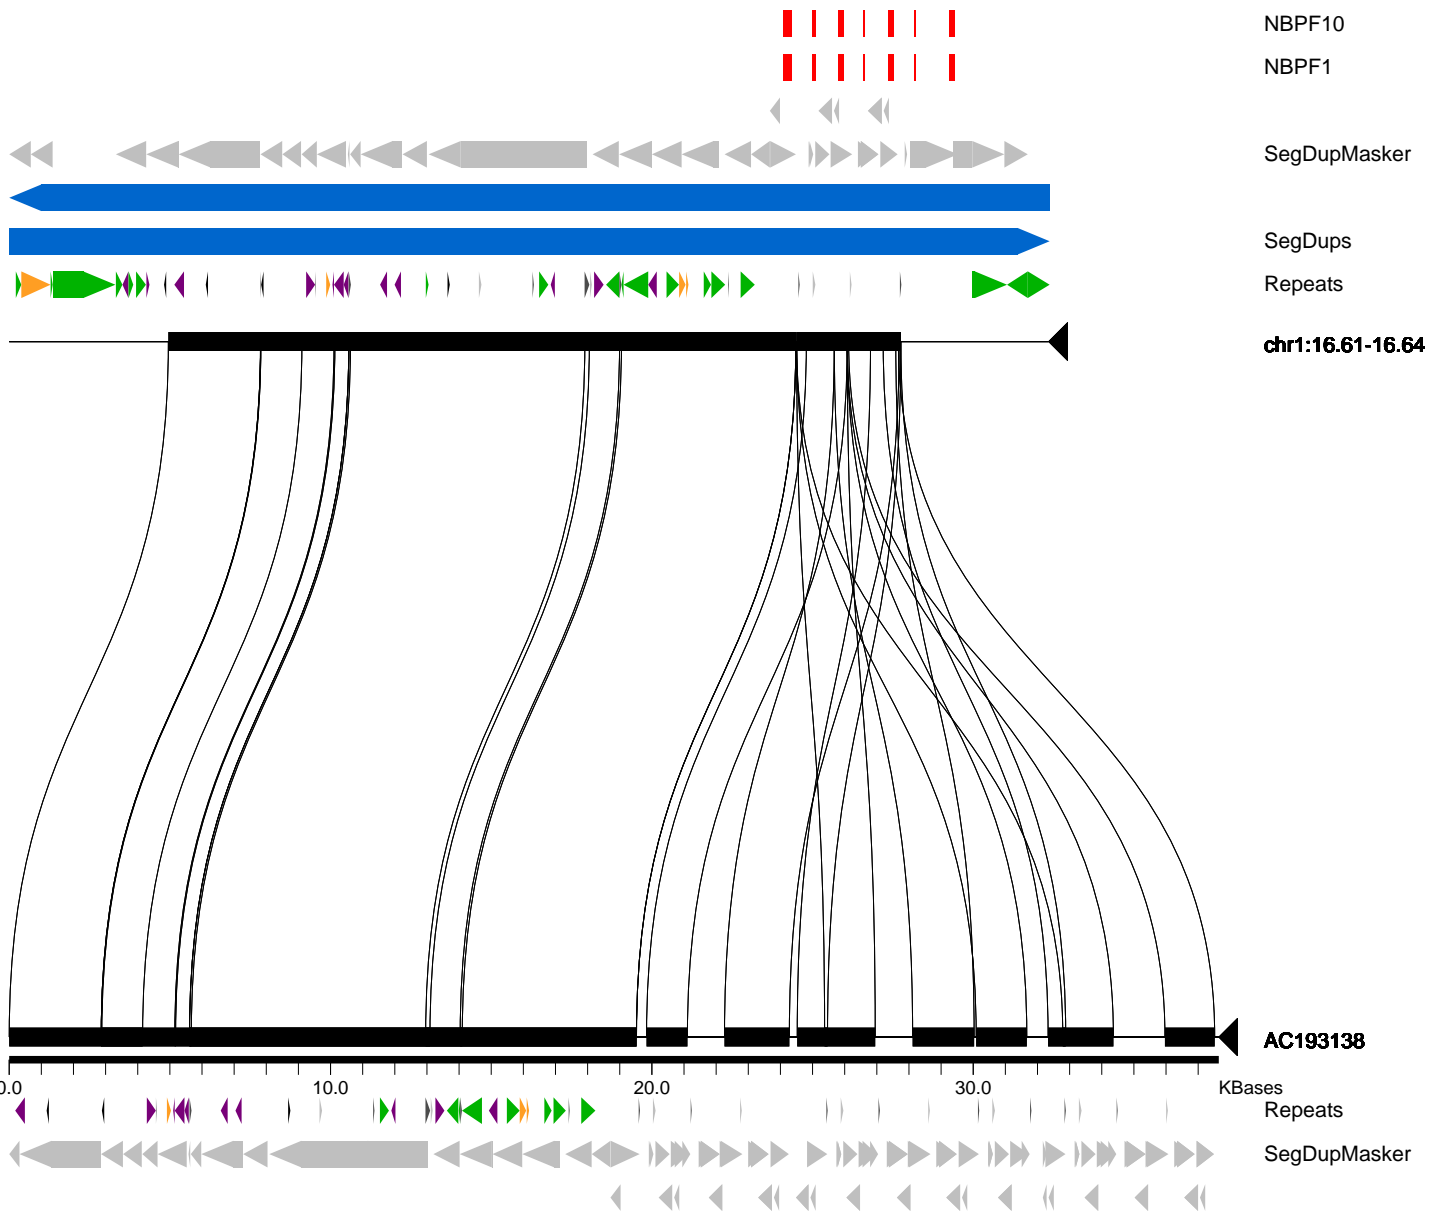

Clone: WIBR2-2240L07 Accession: AC193137

ESP Prediction: INV Validation: V Mechanism: NAHR

Other Simple Repeat Low Complexity DNA LTR LINE SINE

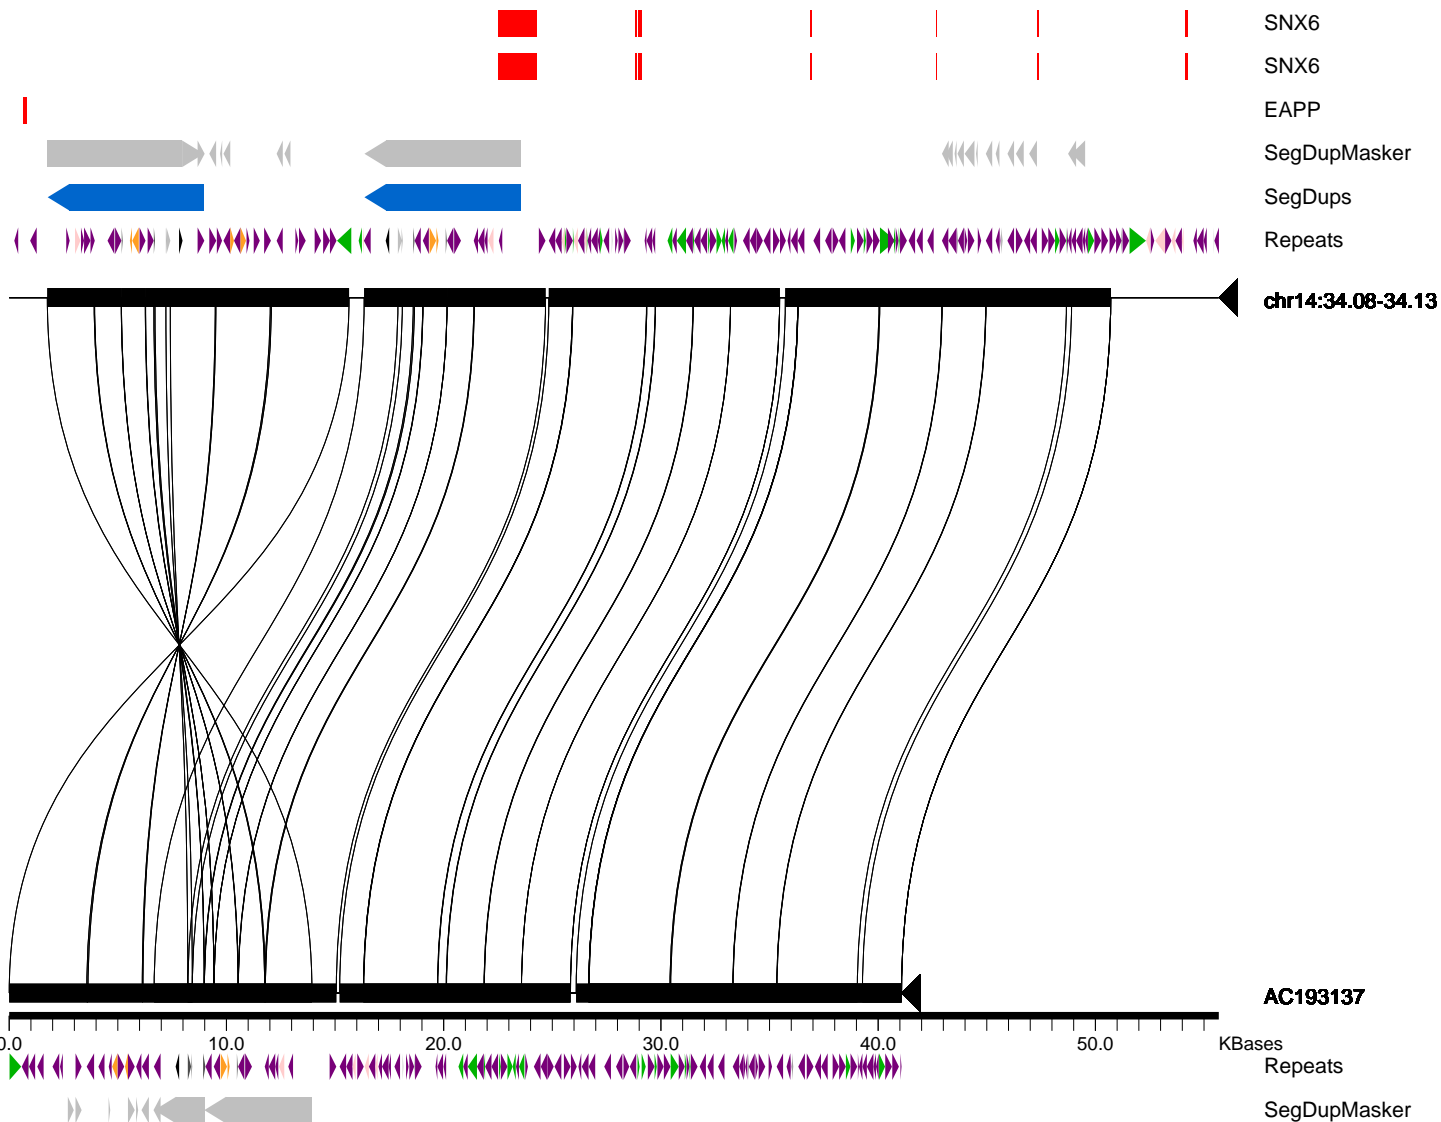

Clone: WIBR2-2859G02 Accession: AC153480

ESP Prediction: S Validation: II Mechanism: NAHR

Other Simple Repeat Low Complexity DNA LTR LINE SINE

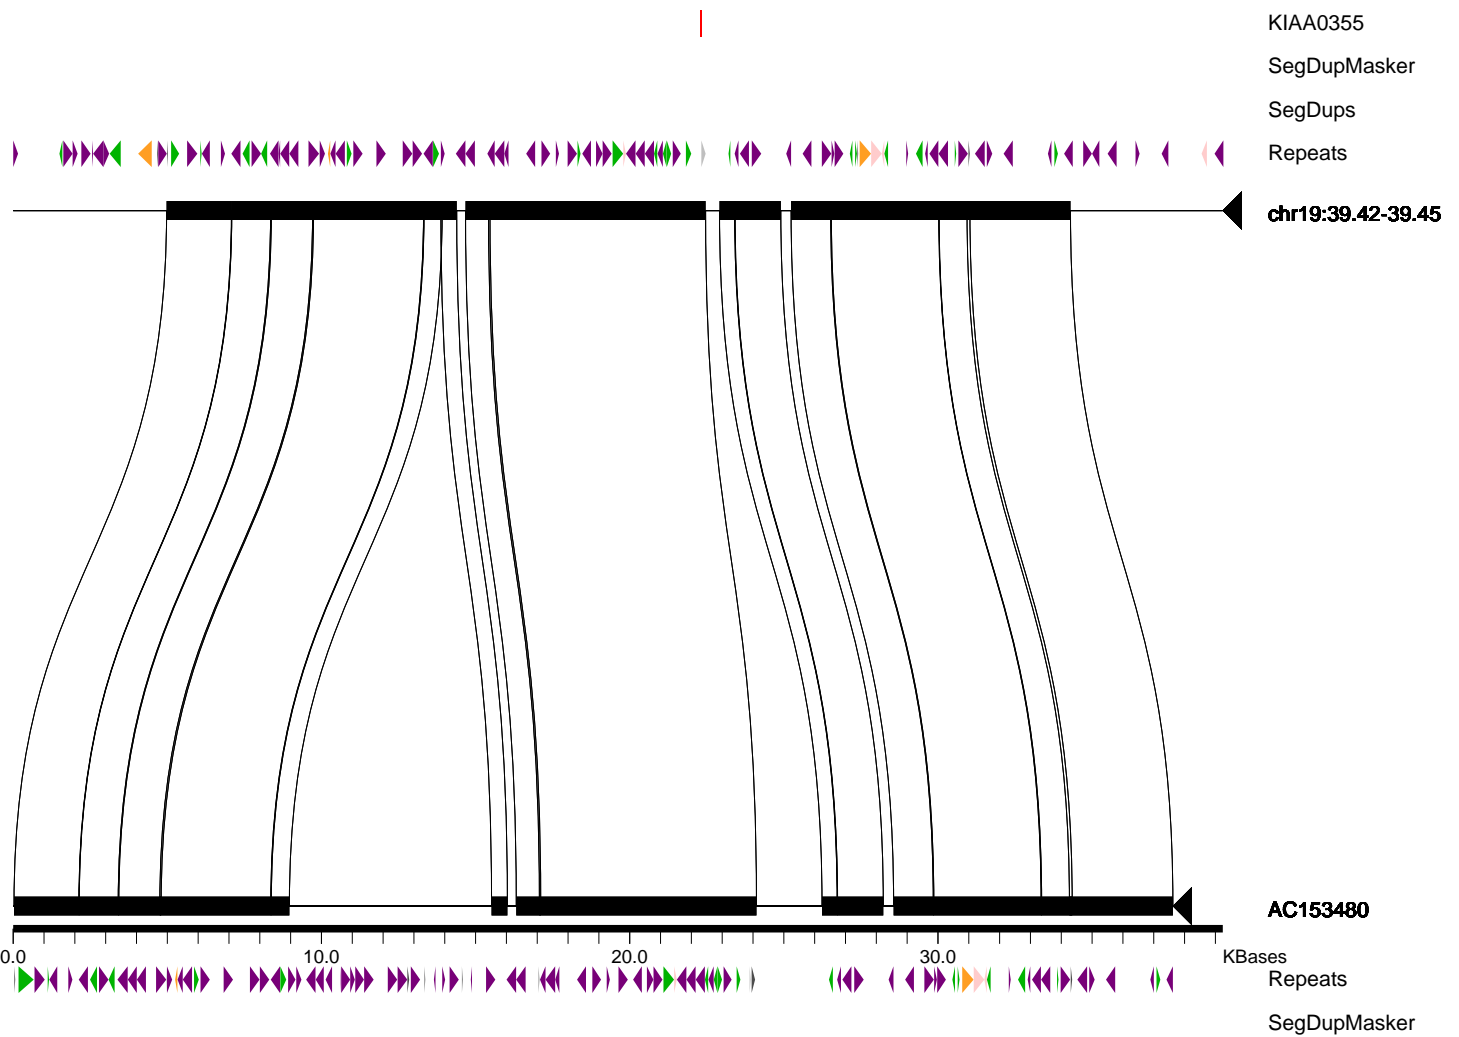

Clone: WIBR2-2885D09 Accession: AC153471

ESP Prediction: S Validation: U Mechanism: NAHR

Other Simple Repeat Low Complexity DNA LTR LINE SINE

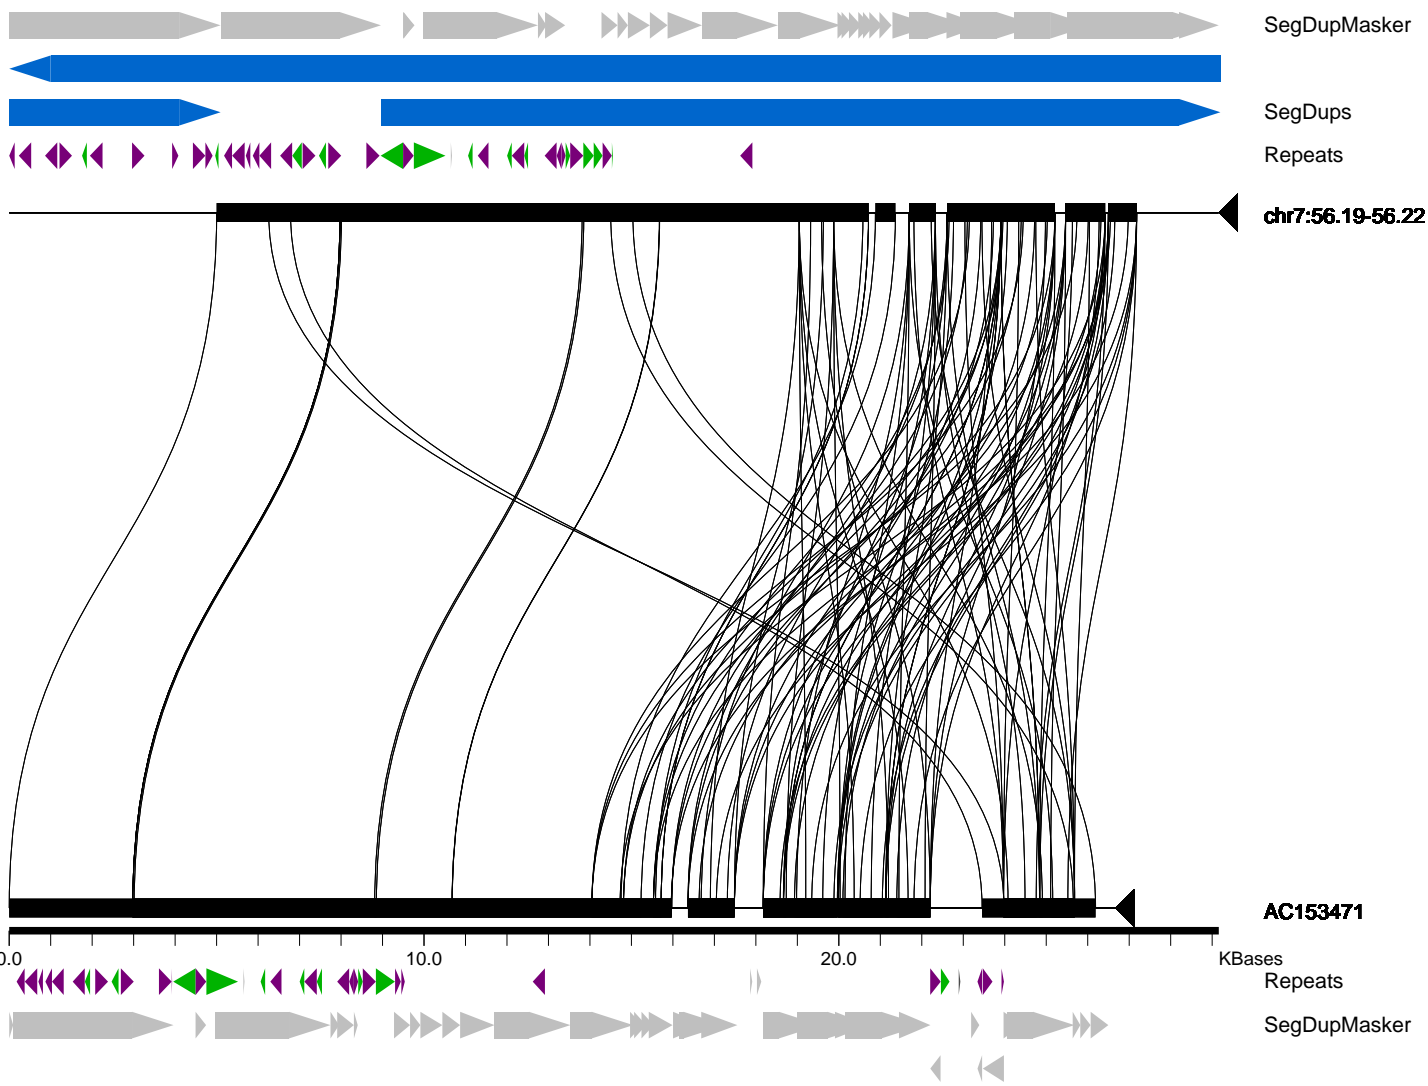

Clone: WIBR2-2841I22 Accession: AC193153

ESP Prediction: INV Validation: V Mechanism: NAHR (?)

Other Simple Repeat Low Complexity DNA LTR LINE SINE

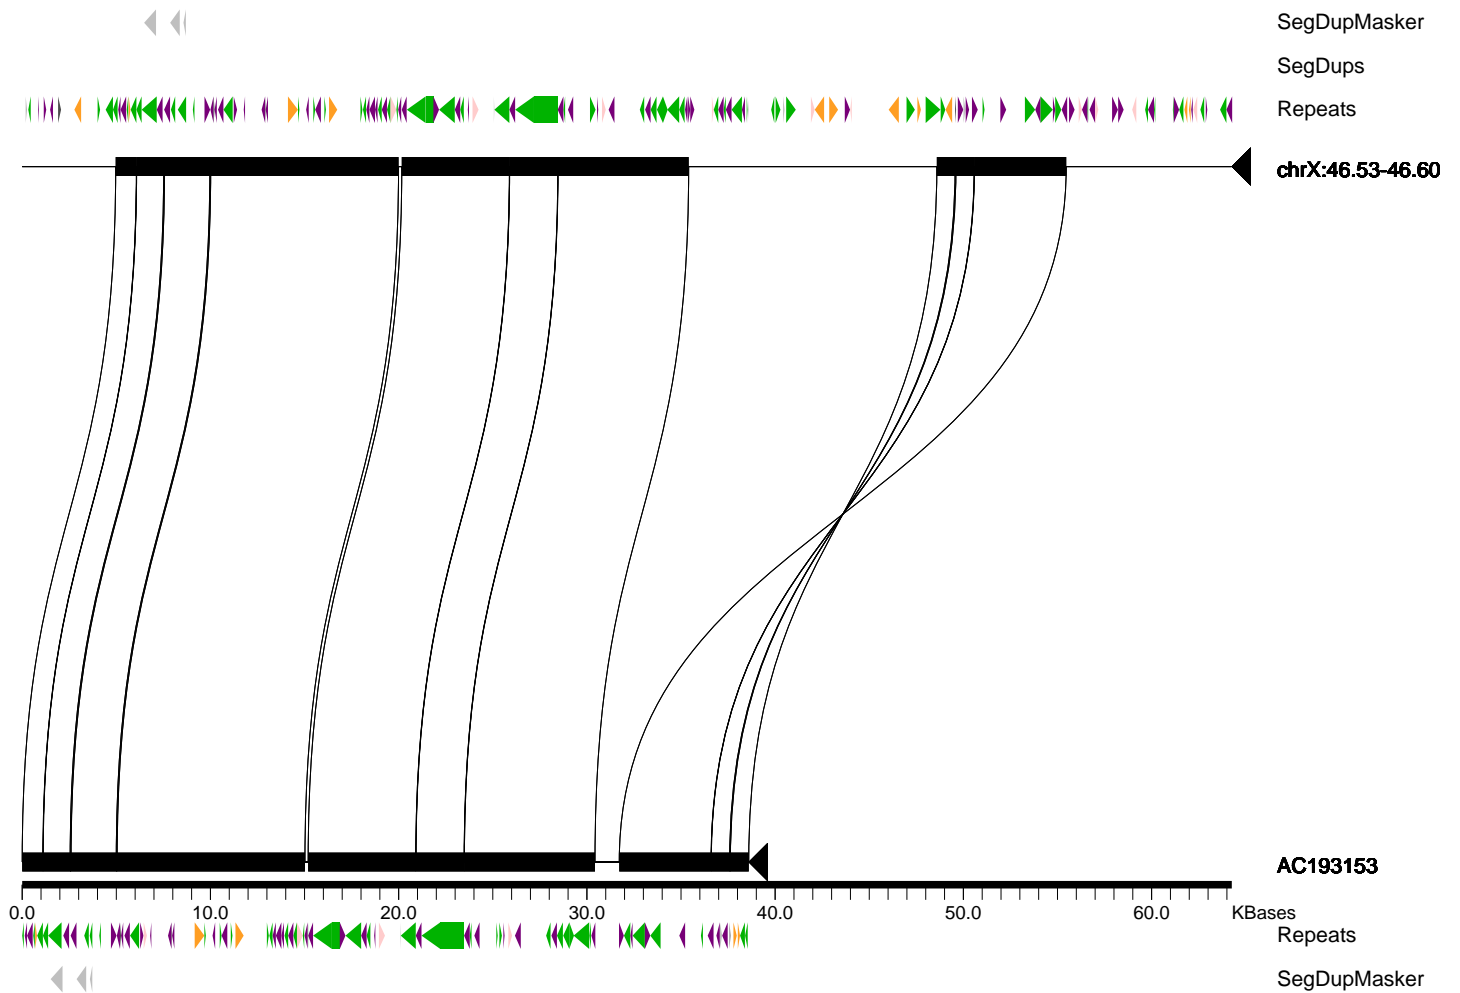



Clone: WIBR2-2794L16 Accession: AC196537

ESP Prediction: B Validation: D Mechanism: NAHR

Other Simple Repeat Low Complexity DNA LTR LINE SINE

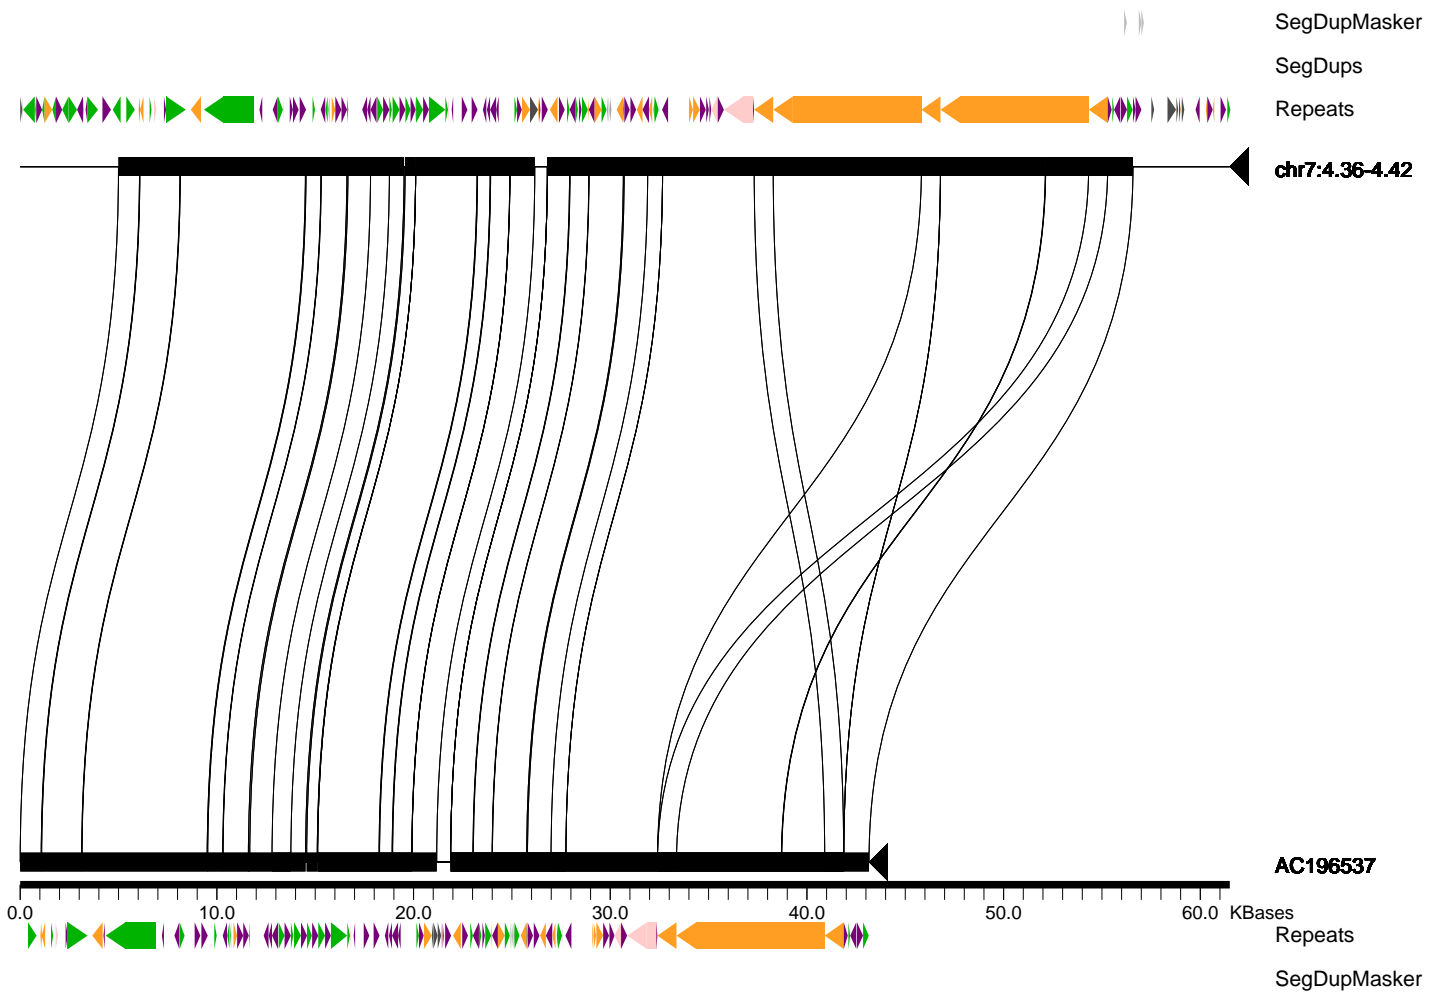

Clone: WIBR2-2806L04 Accession: AC193152

ESP Prediction: B Validation: D Mechanism: NAHR

Other Simple Repeat Low Complexity DNA LTR LINE SINE

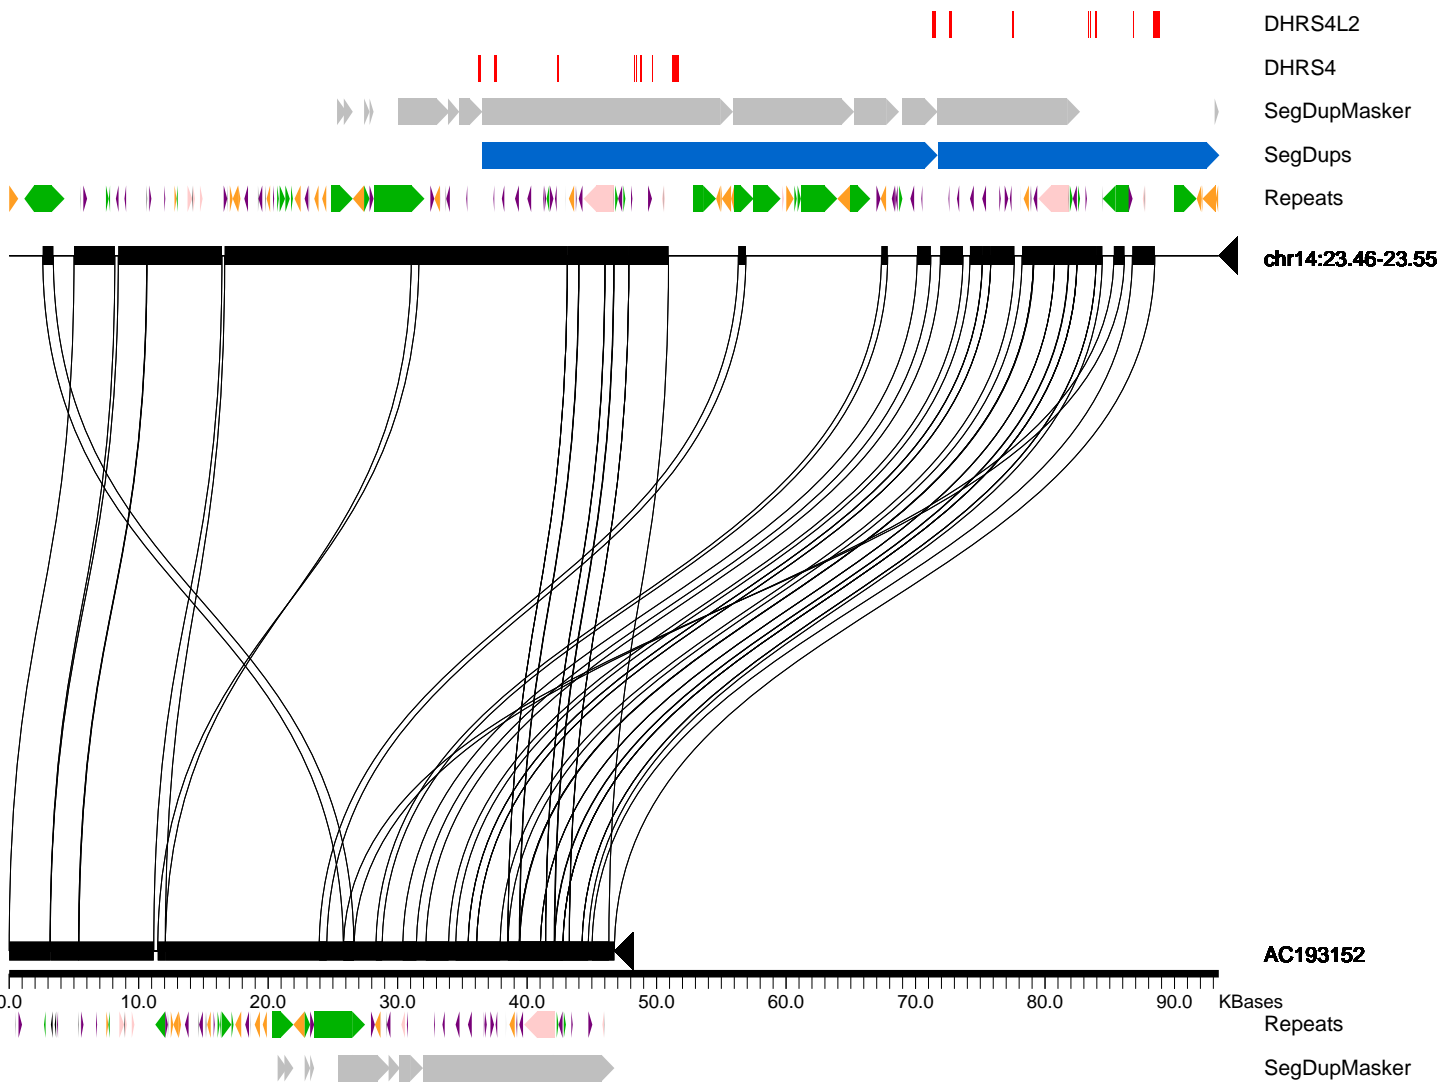

Clone: WIBR2-2793I08 Accession: AC196535

ESP Prediction: INV Validation: V Mechanism: NAHR

Other Simple Repeat Low Complexity DNA LTR LINE SINE

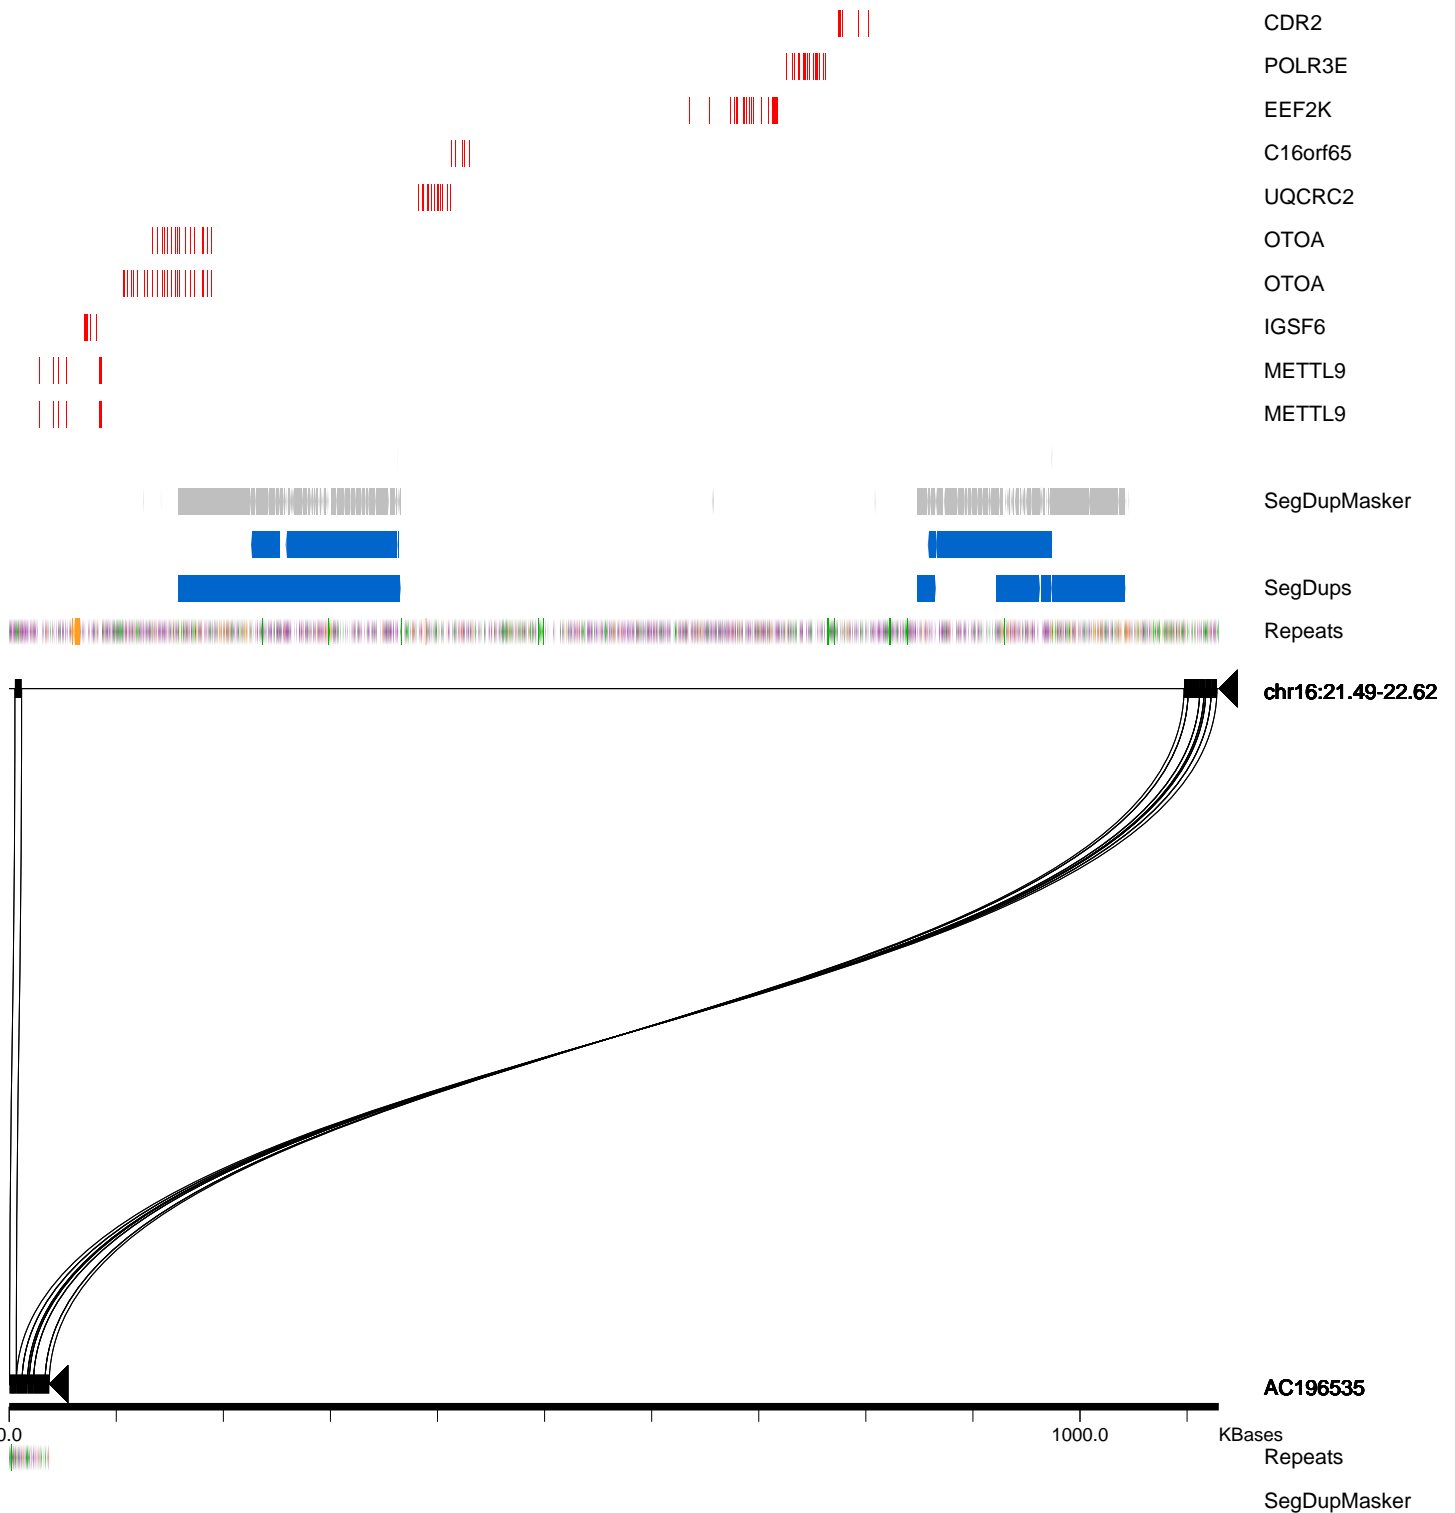

Clone: WIBR2-2674M21 Accession: AC153479

ESP Prediction: S Validation: I Mechanism: NAHR

Other Simple Repeat Low Complexity DNA LTR LINE SINE

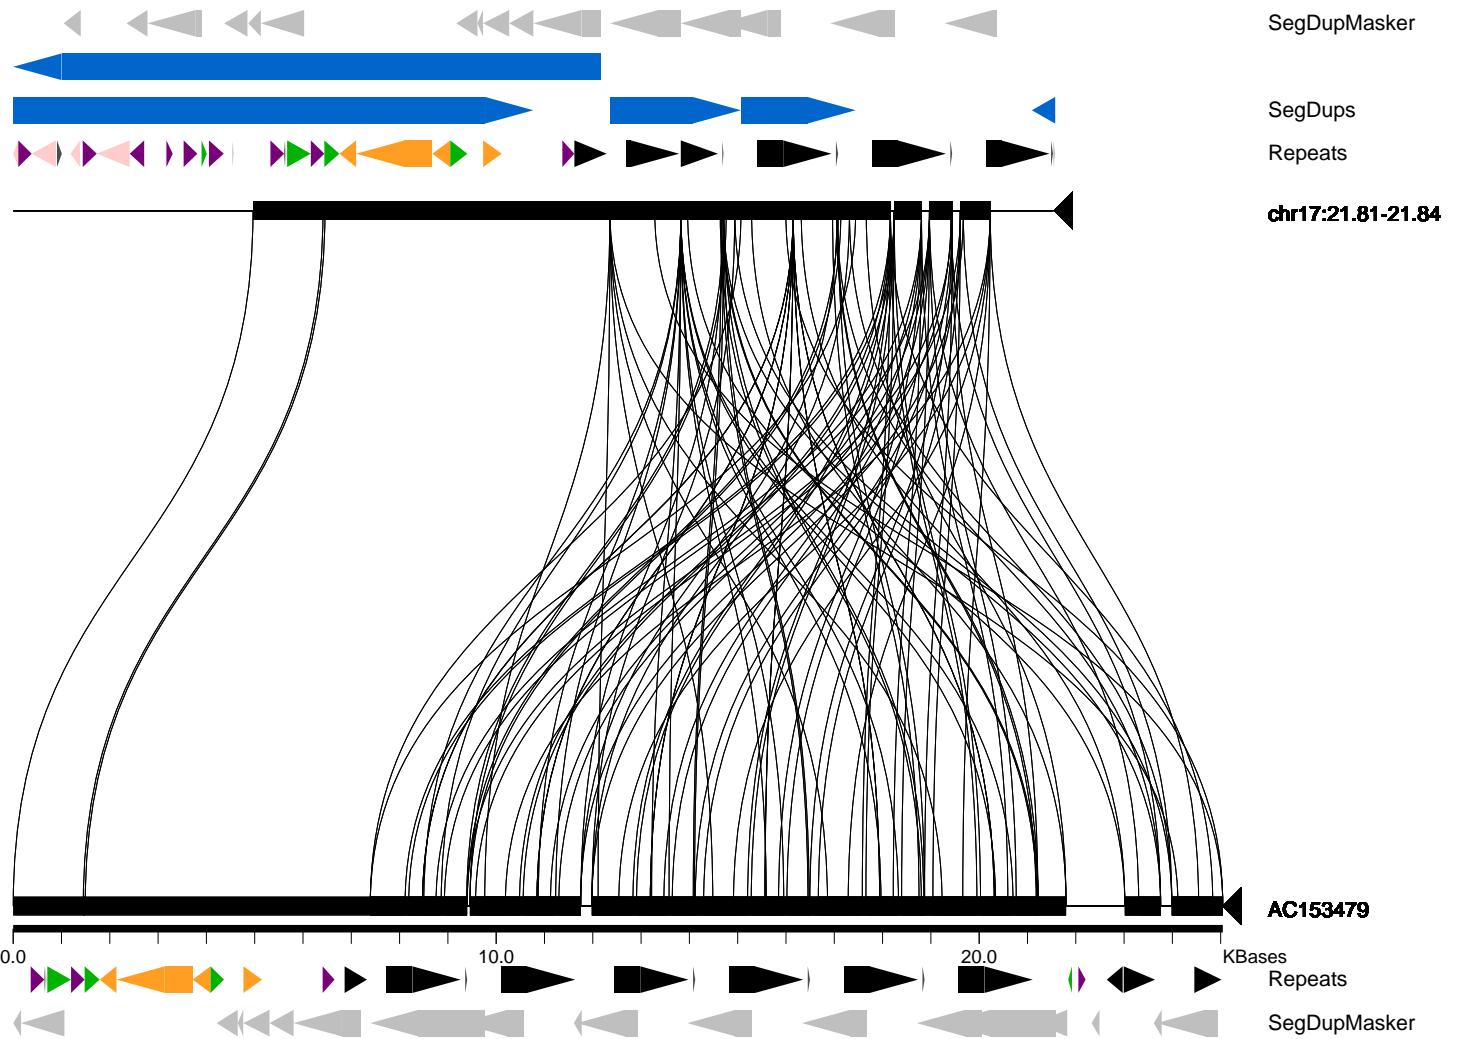

Clone: WIBR2-2746D13 Accession: AC196534

ESP Prediction: INV Validation: V Mechanism: NAHR (?)

Other Simple Repeat Low Complexity DNA LTR LINE SINE

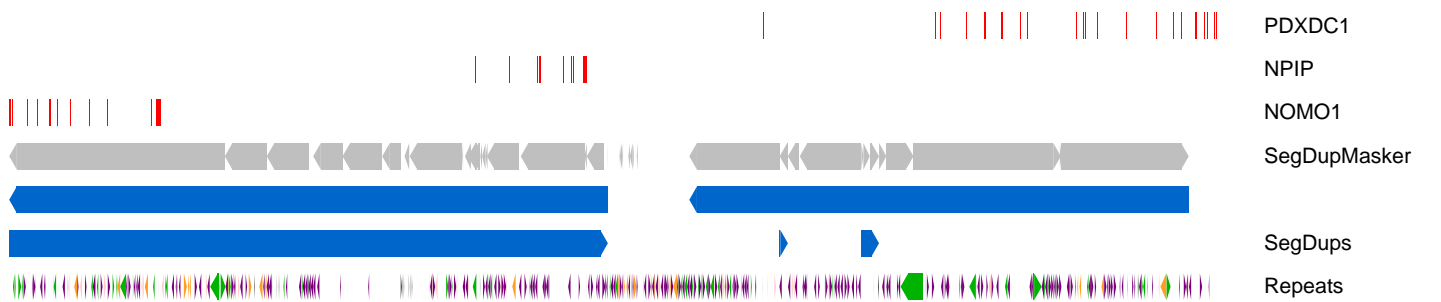

chr16:14.88-15.04

AC196534

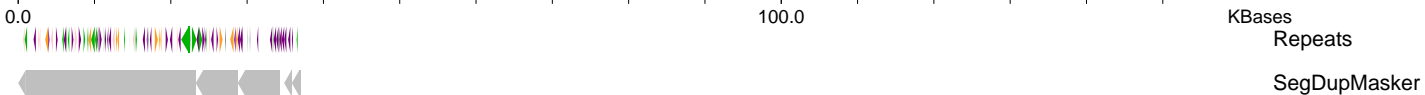

Clone: WIBR2-2914C08 Accession: AC196541

ESP Prediction: S Validation: I Mechanism: NAHR

Other Simple Repeat Low Complexity DNA LTR LINE SINE

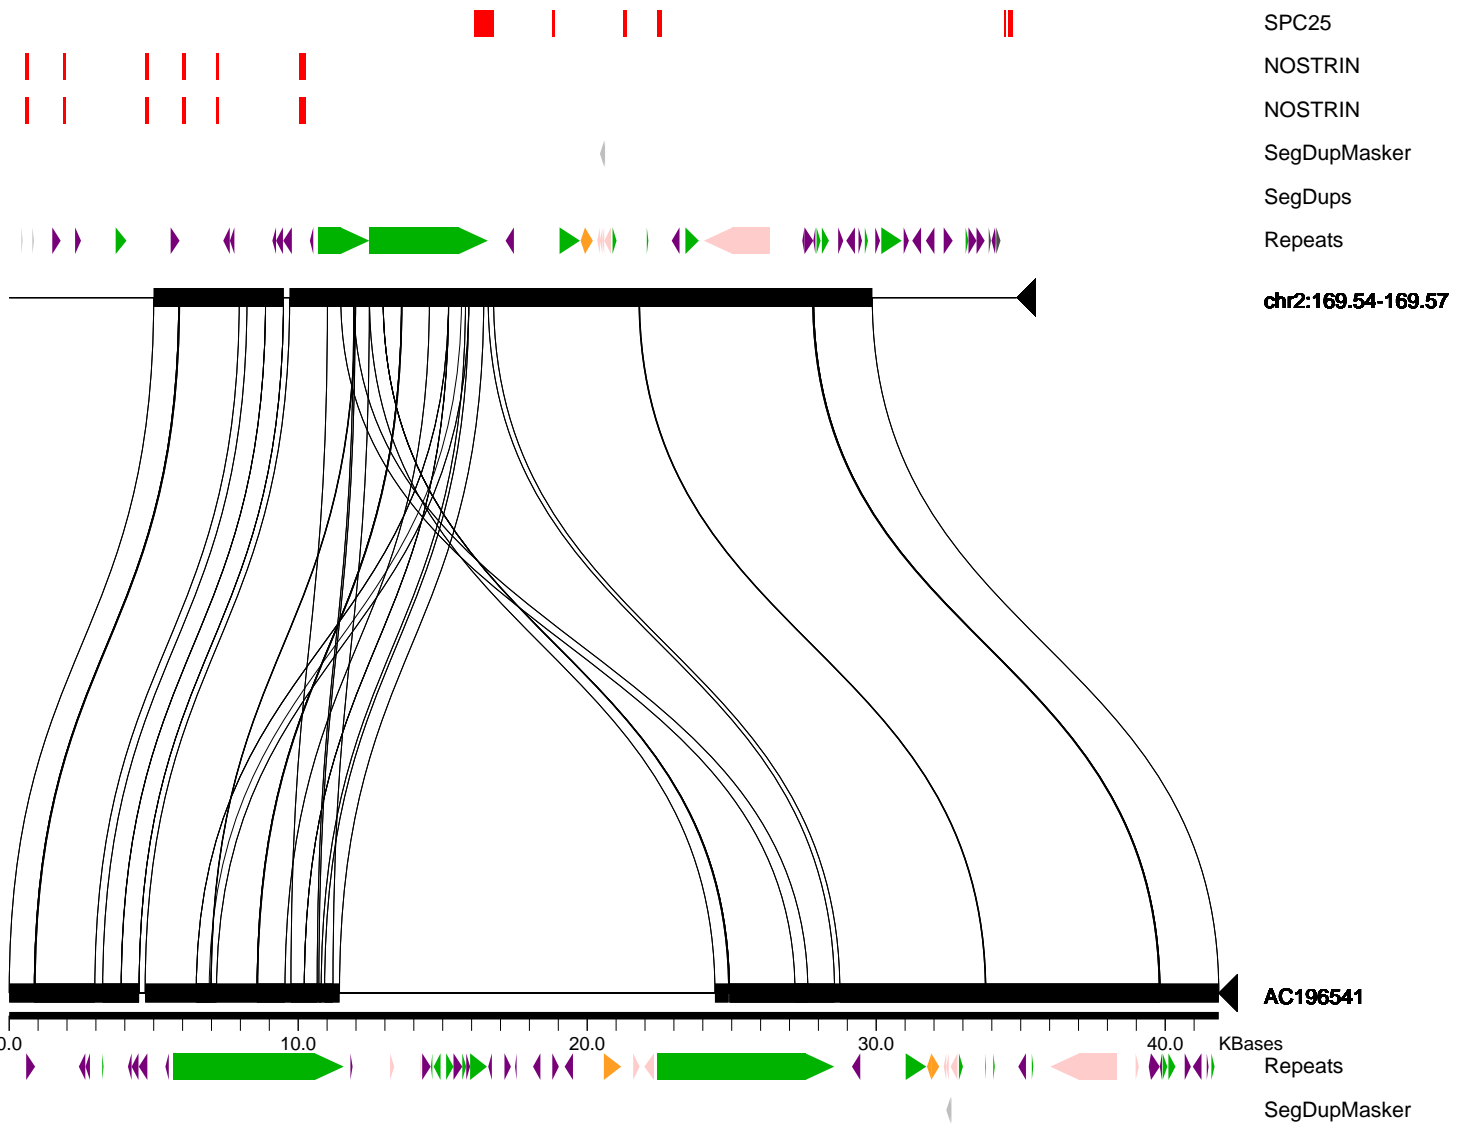

Clone: WIBR2-2936F20 Accession: AC193156

ESP Prediction: S Validation: U Mechanism: NAHR?

Other Simple Repeat Low Complexity DNA LTR LINE SINE

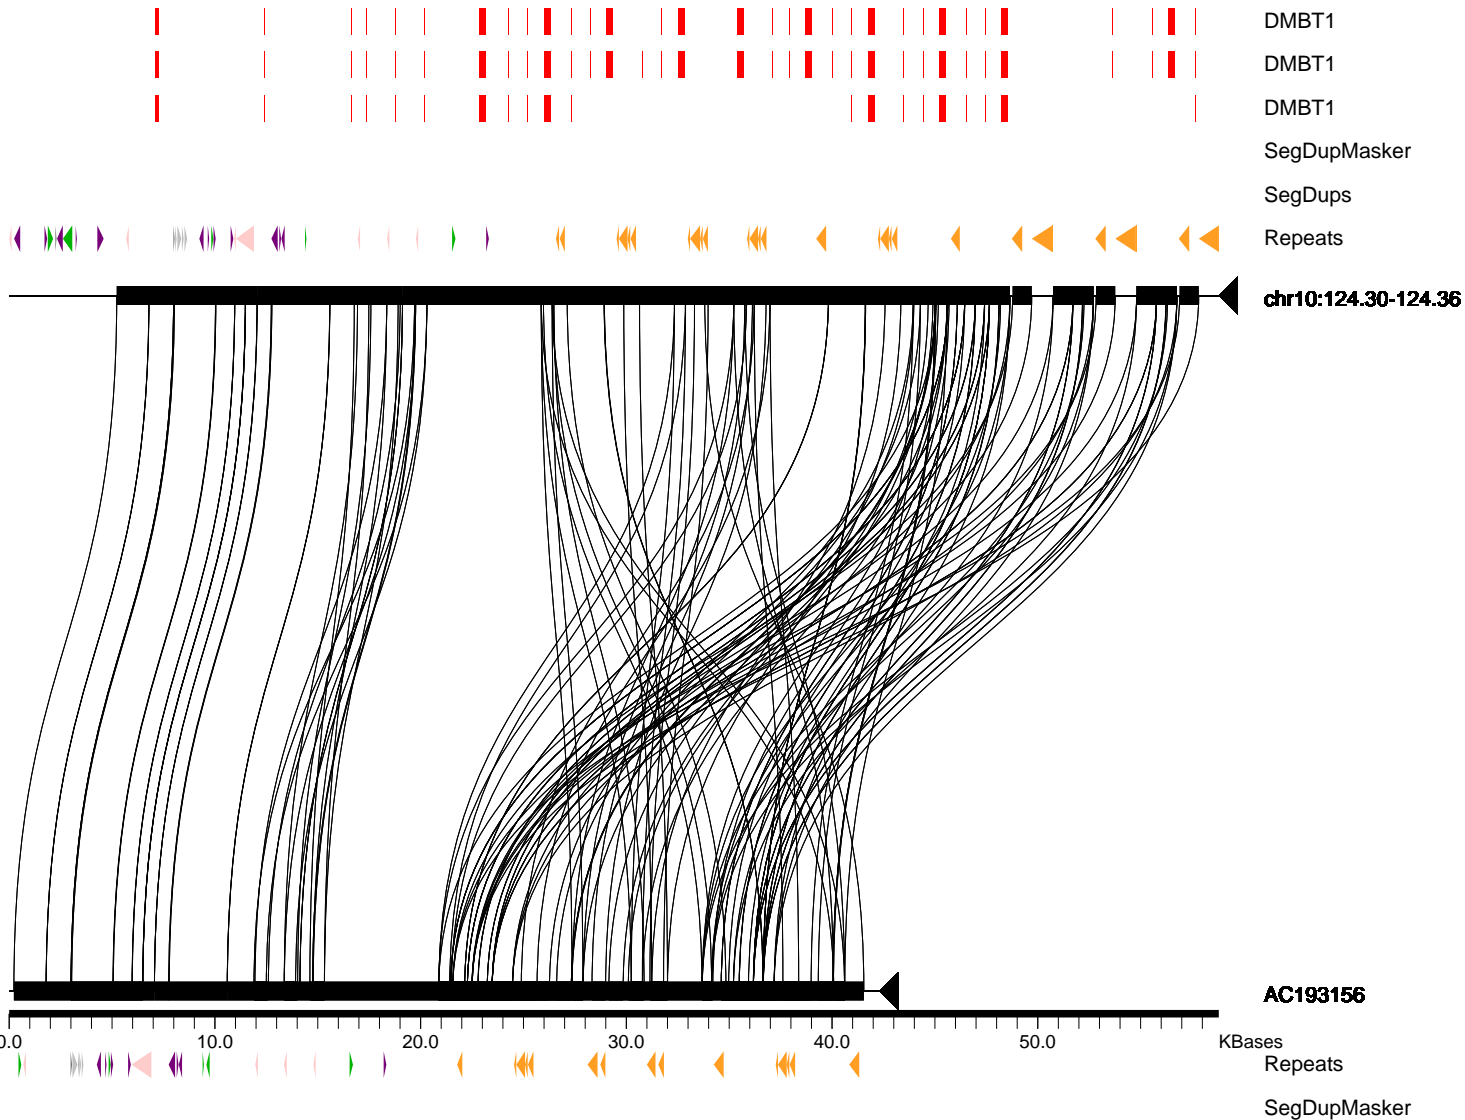

Clone: WIBR2-2950N23 Accession: AC153466

ESP Prediction: B Validation: D Mechanism: NAHR

Other Simple Repeat Low Complexity DNA LTR LINE SINE

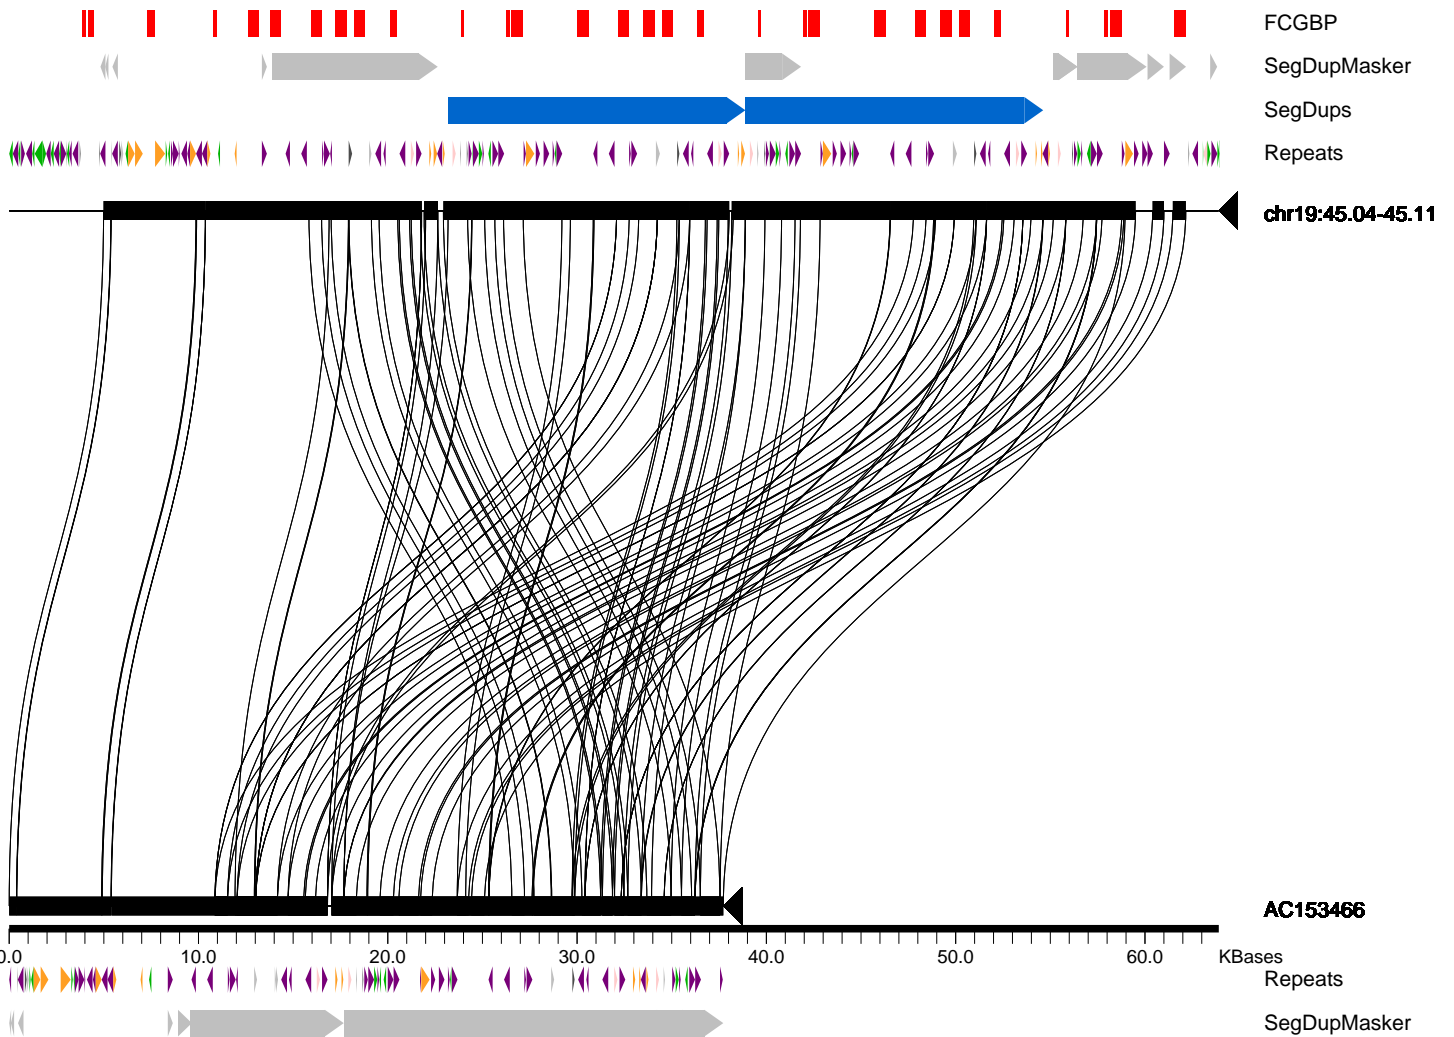



Clone: WIBR2-3130B22 Accession: AC196546

ESP Prediction: B Validation: D Mechanism: NAHR

Other Simple Repeat Low Complexity DNA LTR LINE SINE

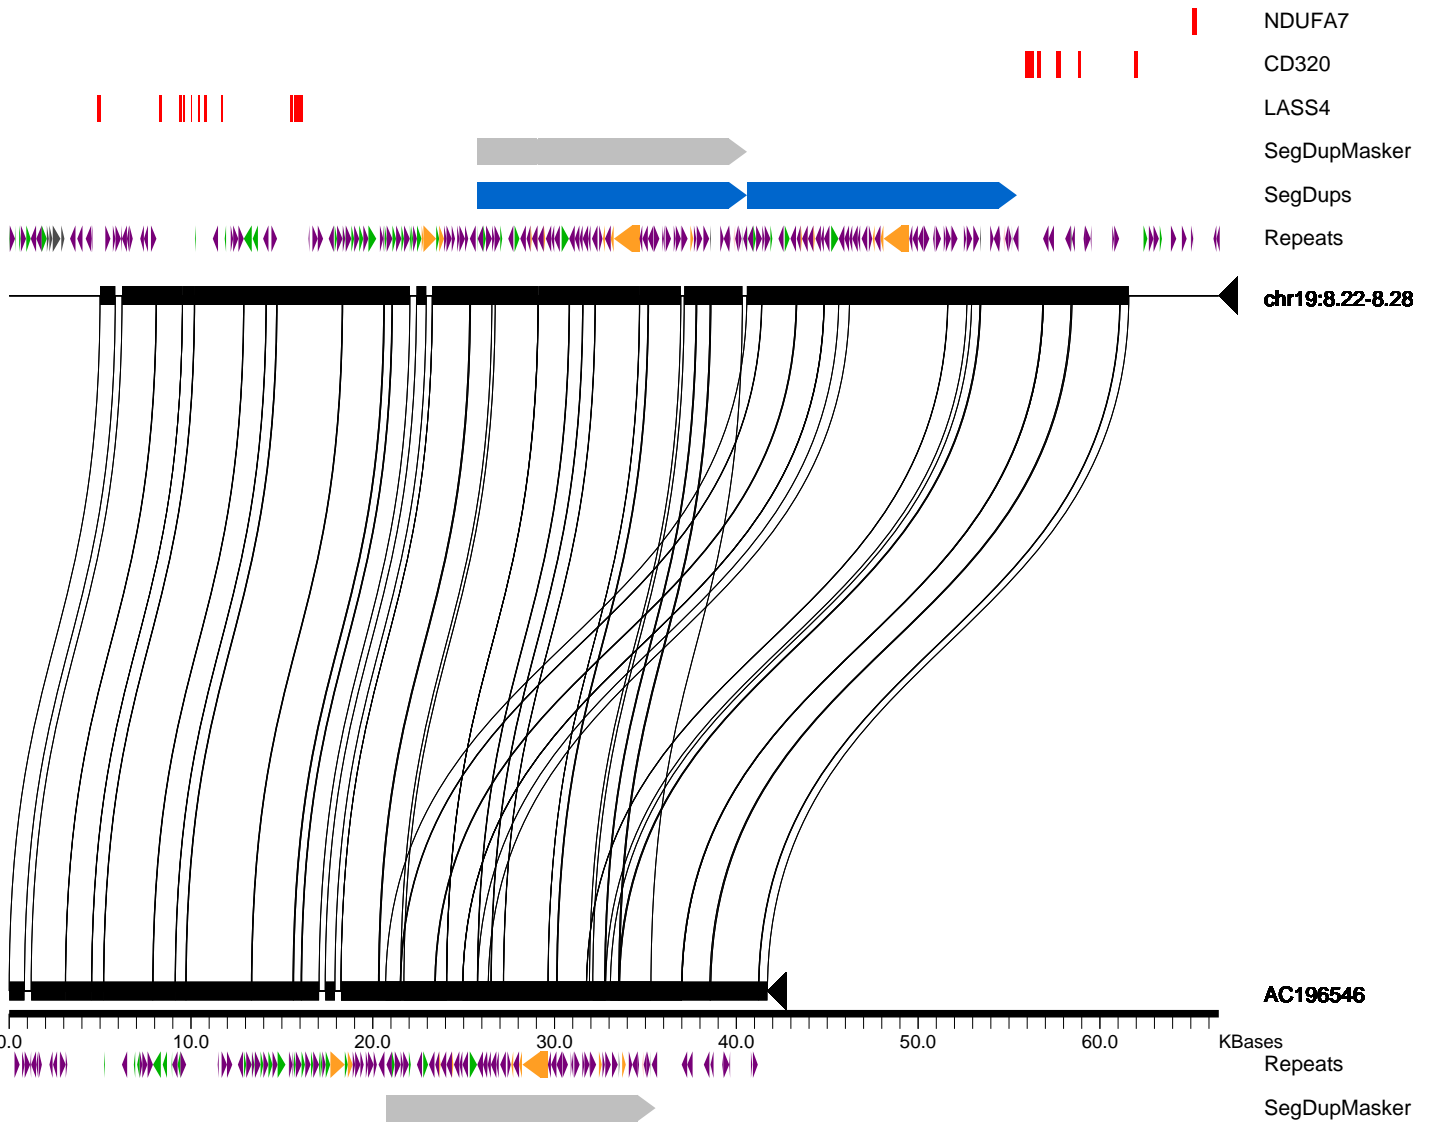

Clone: WIBR2-3228B06 Accession: AC193167

ESP Prediction: S Validation: I Mechanism: NAHR

Other Simple Repeat Low Complexity DNA LTR LINE SINE

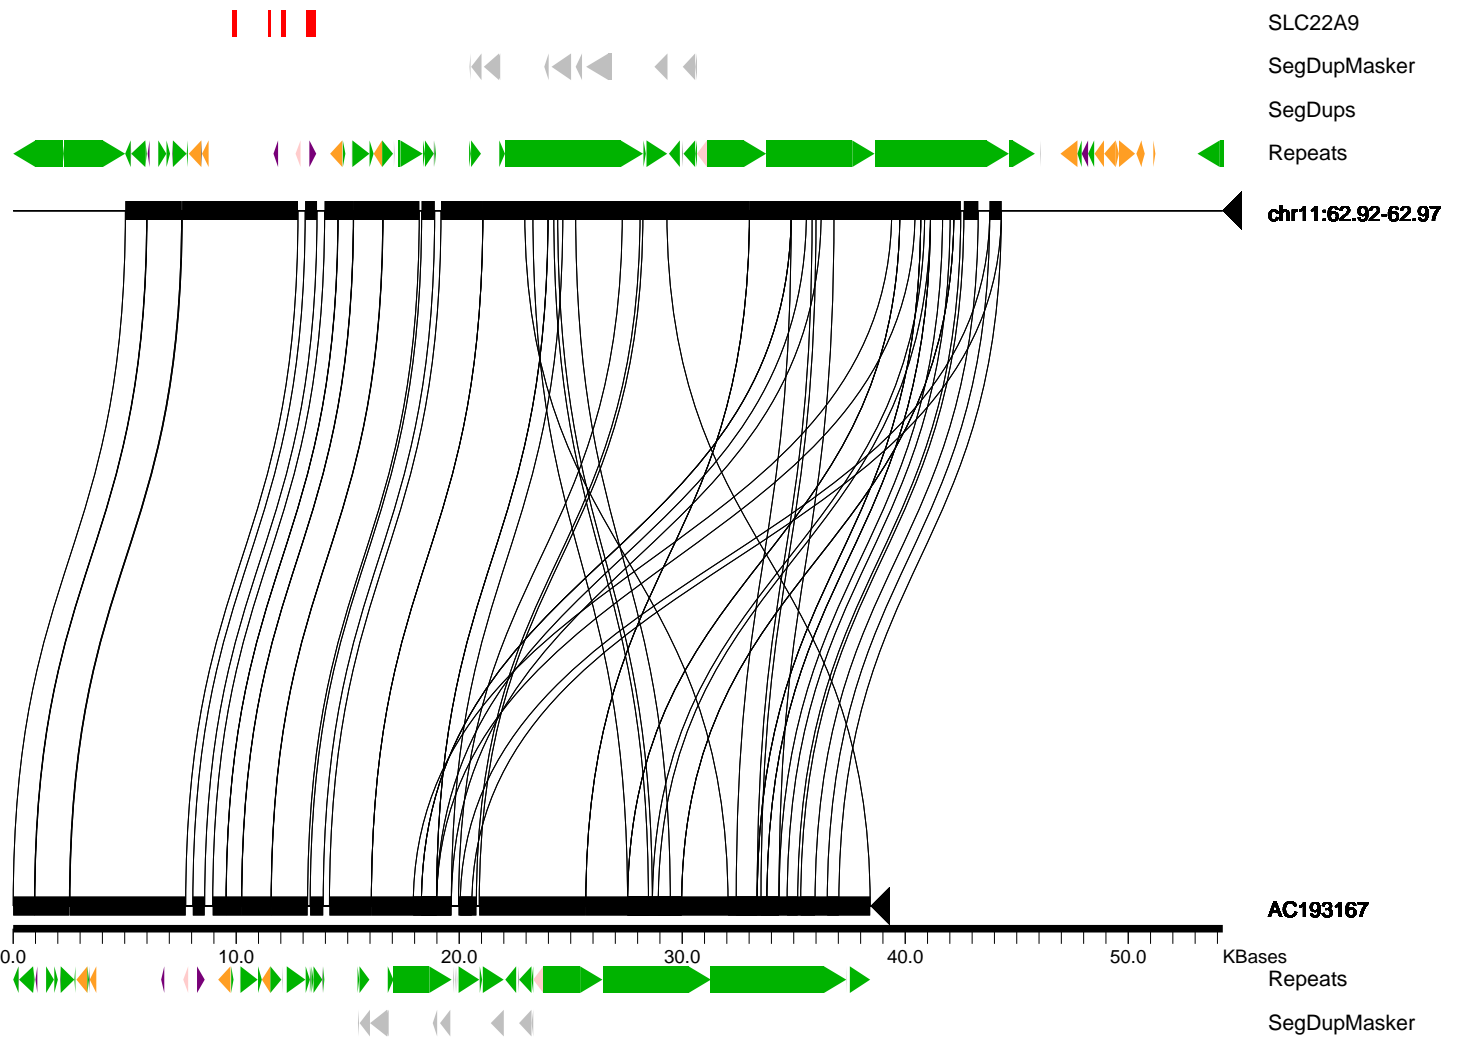

Clone: WIBR2-3154I13 Accession: AC196547

ESP Prediction: B Validation: D Mechanism: NAHR?

Other Simple Repeat Low Complexity DNA LTR LINE SINE

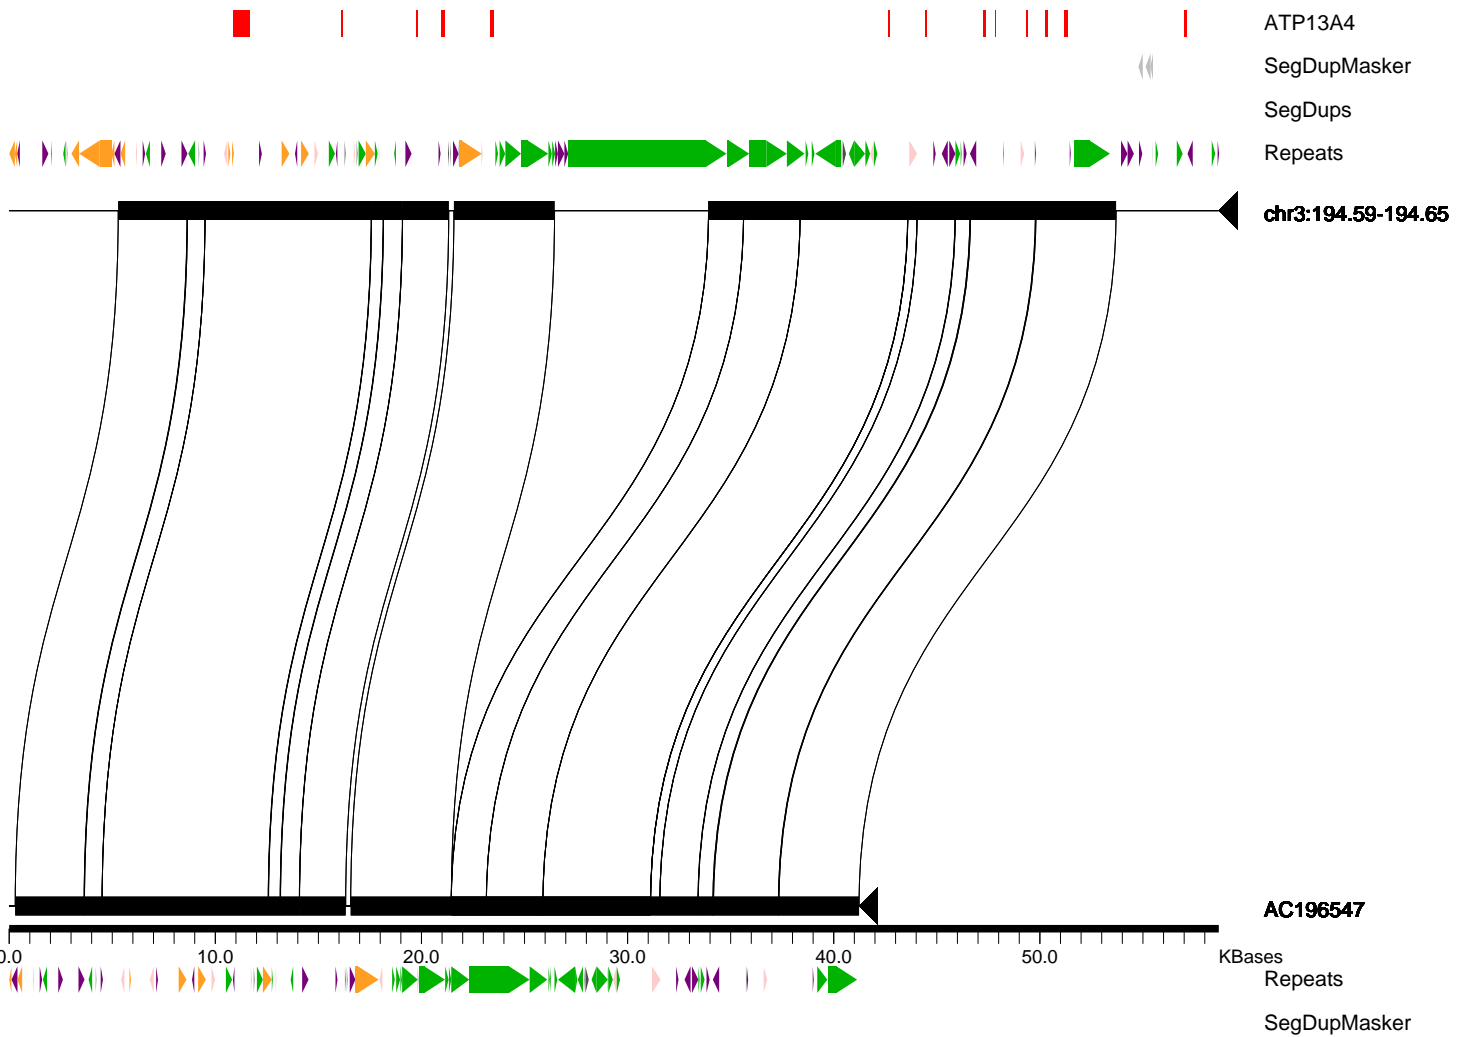

Clone: WIBR2-3079L24 Accession: AC193095

ESP Prediction: B Validation: D Mechanism: NAHR

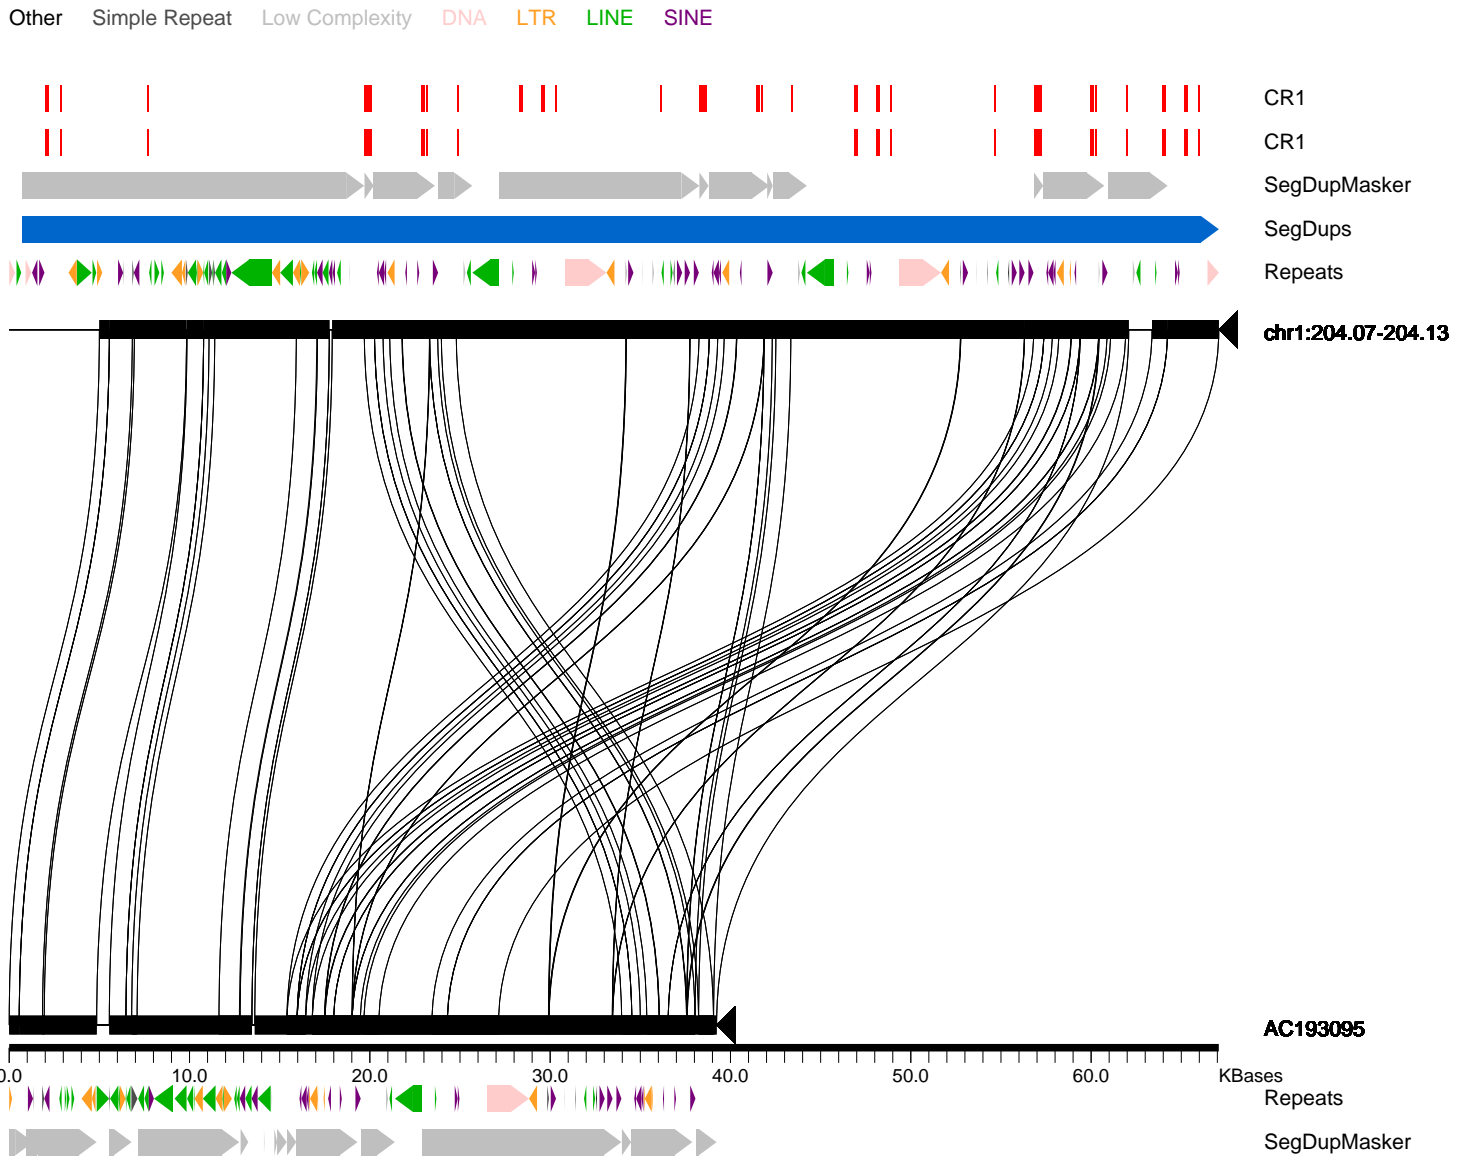

Clone: WIBR2-0580I15 Accession: AC193112

ESP Prediction: S Validation: I Mechanism: NAHR

Other Simple Repeat Low Complexity DNA LTR LINE SINE

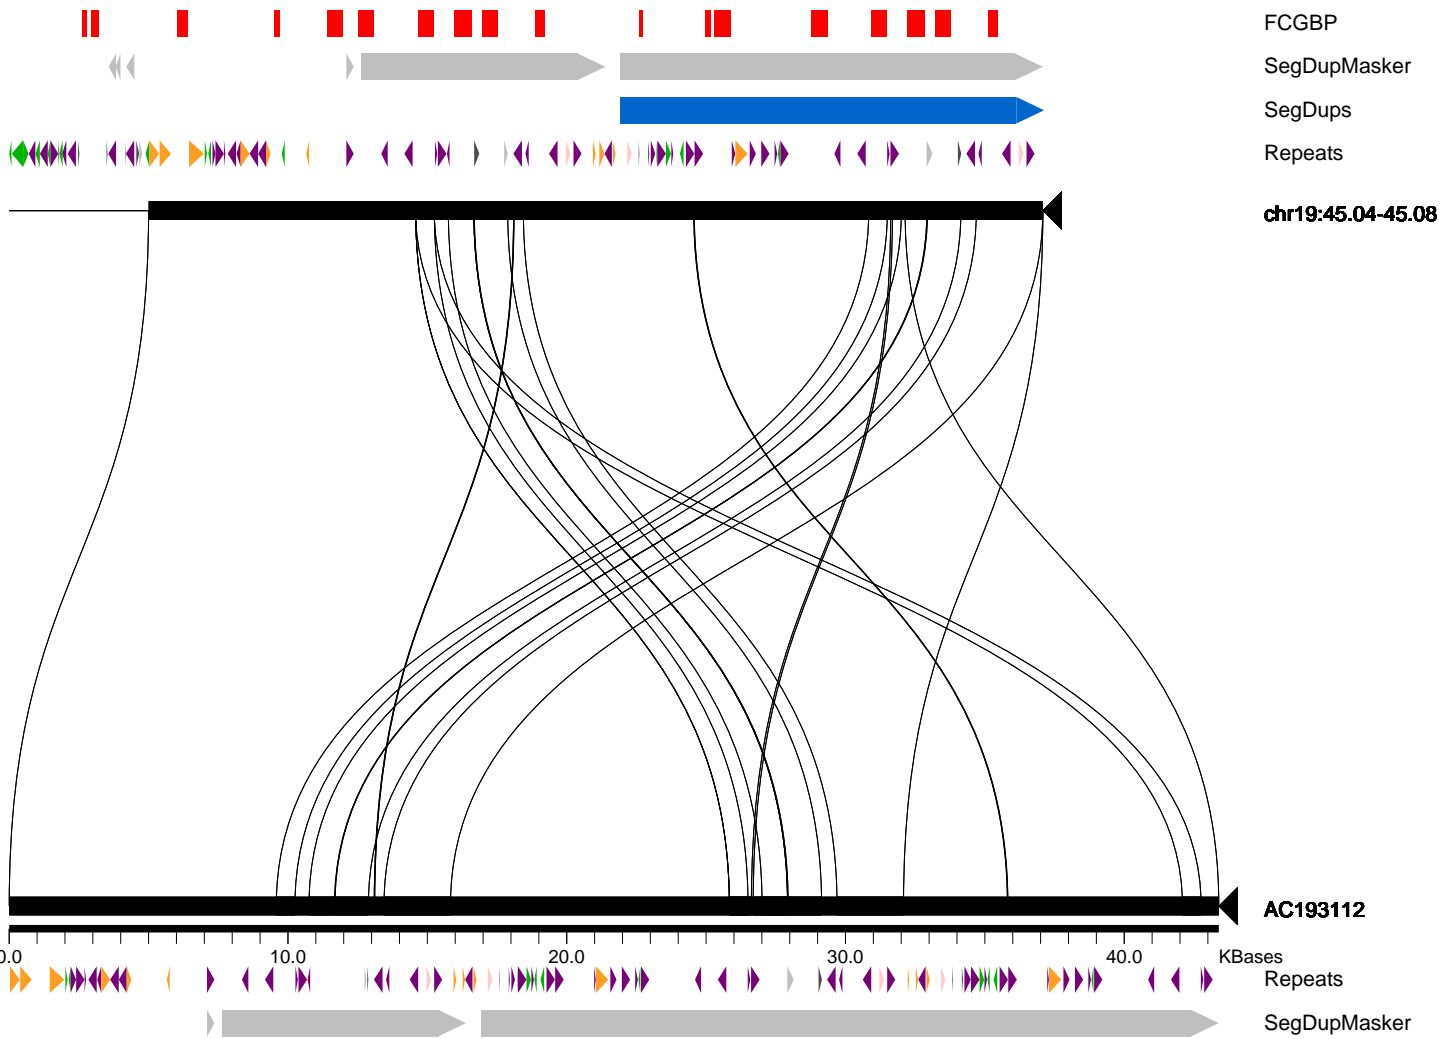

Clone: WIBR2-3032L11 Accession: AC196545

ESP Prediction: INV Validation: V Mechanism: NAHR

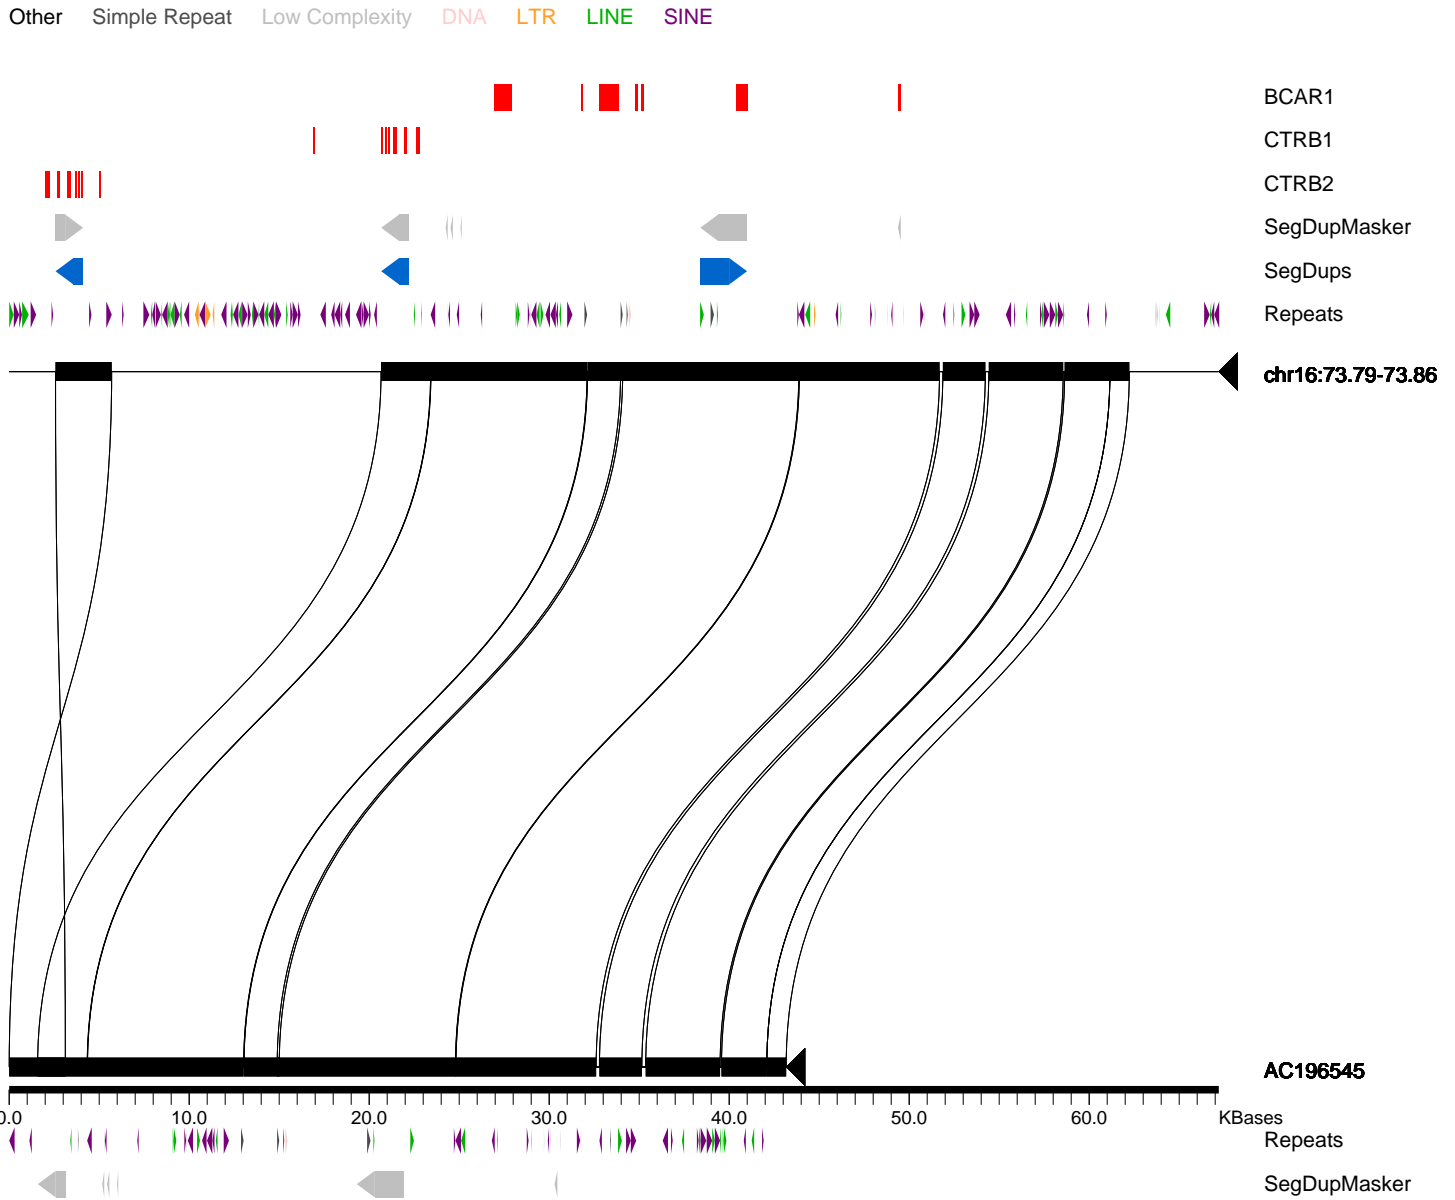

Clone: WIBR2-2974D11 Accession: AC195768

ESP Prediction: INV Validation: V Mechanism: NAHR

Other Simple Repeat Low Complexity DNA LTR LINE SINE

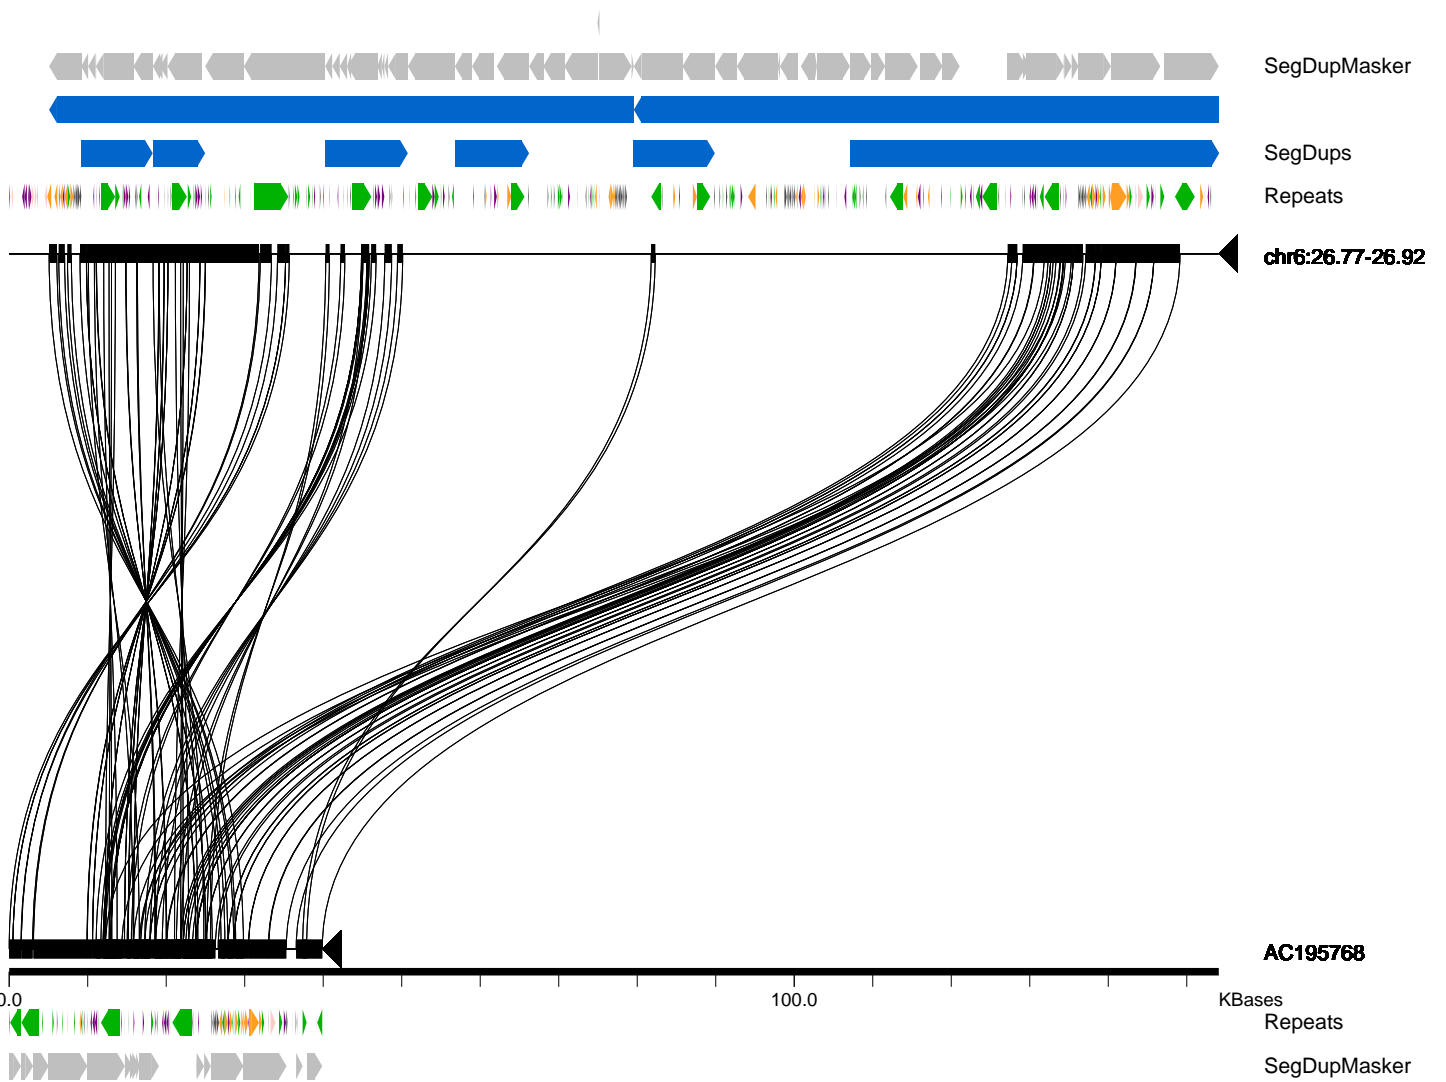

Clone: ABC9\_43900100\_F20 Accession: AC204971  
ESP Prediction: S Validation: I Mechanism: NHEJ (AS)

Other Simple Repeat Low Complexity DNA LTR LINE SINE

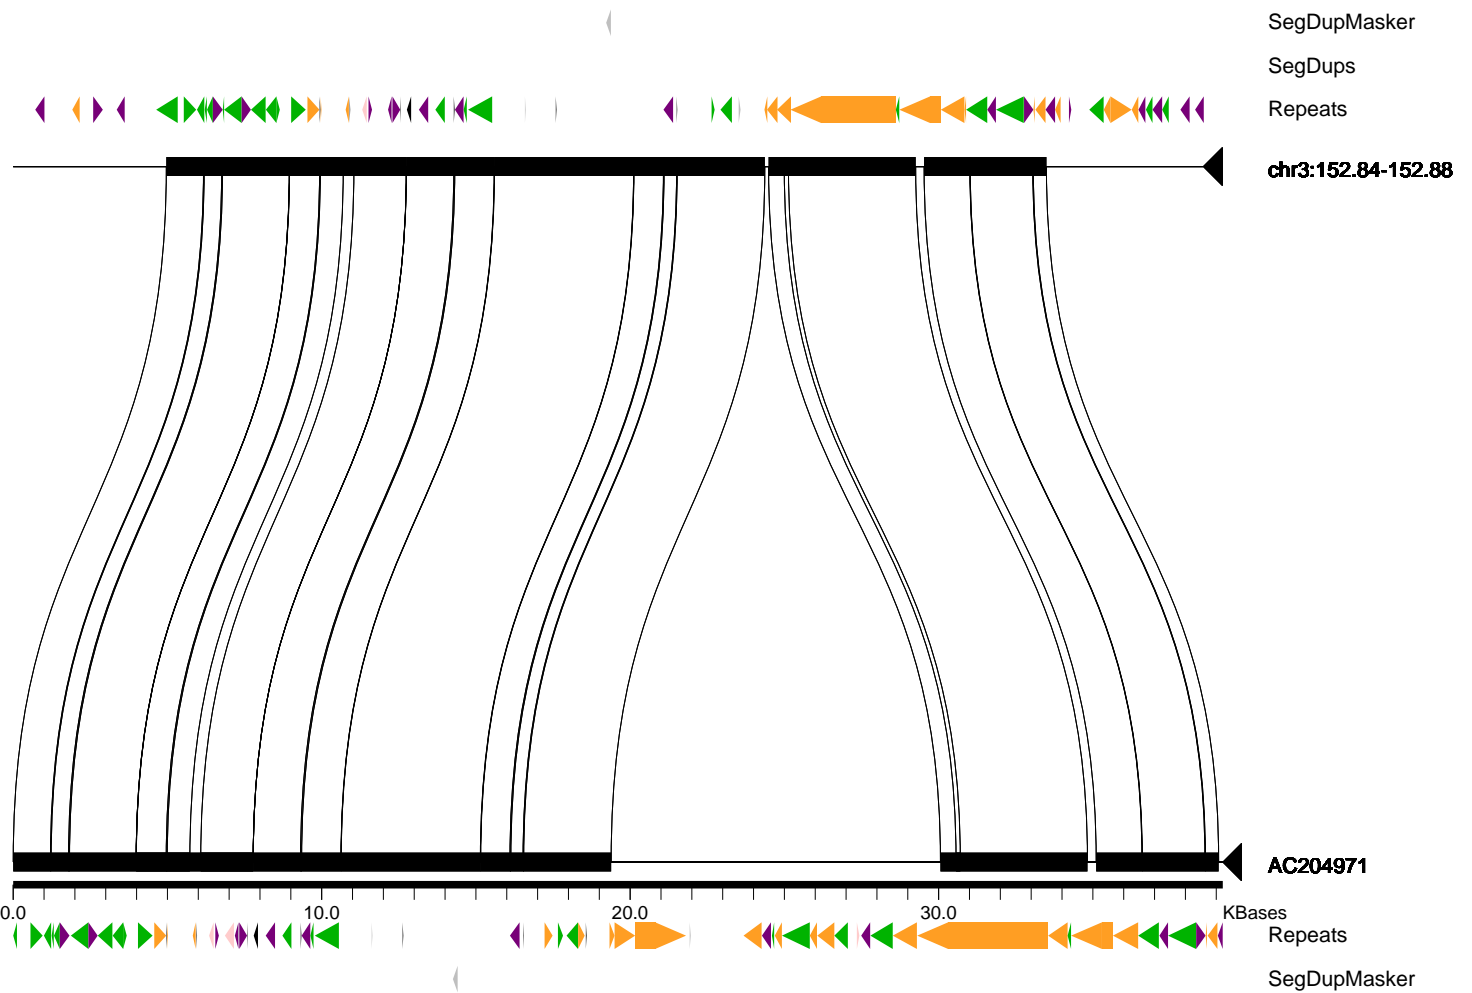



Clone: ABC9\_41267400\_J23 Accession: AC206481

ESP Prediction: B Validation: D Mechanism: NHEJ

Other Simple Repeat Low Complexity DNA LTR LINE SINE

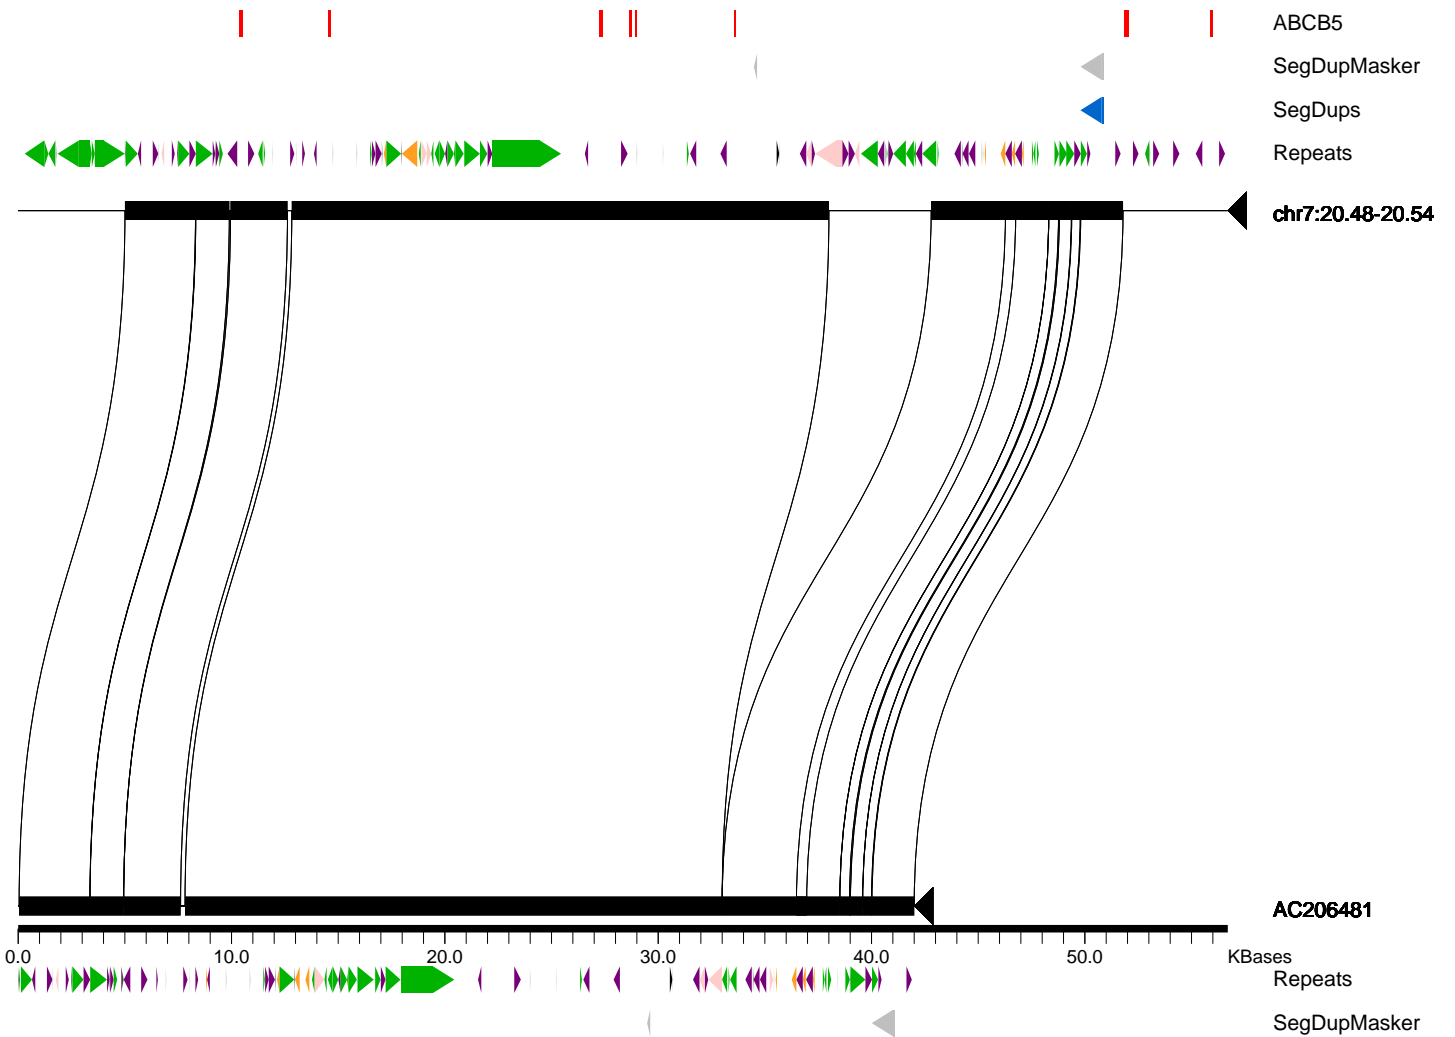

Clone: ABC9\_41271200\_D24 Accession: AC205876  
ESP Prediction: S Validation: I Mechanism: NHEJ (AS)

Other Simple Repeat Low Complexity DNA LTR LINE SINE

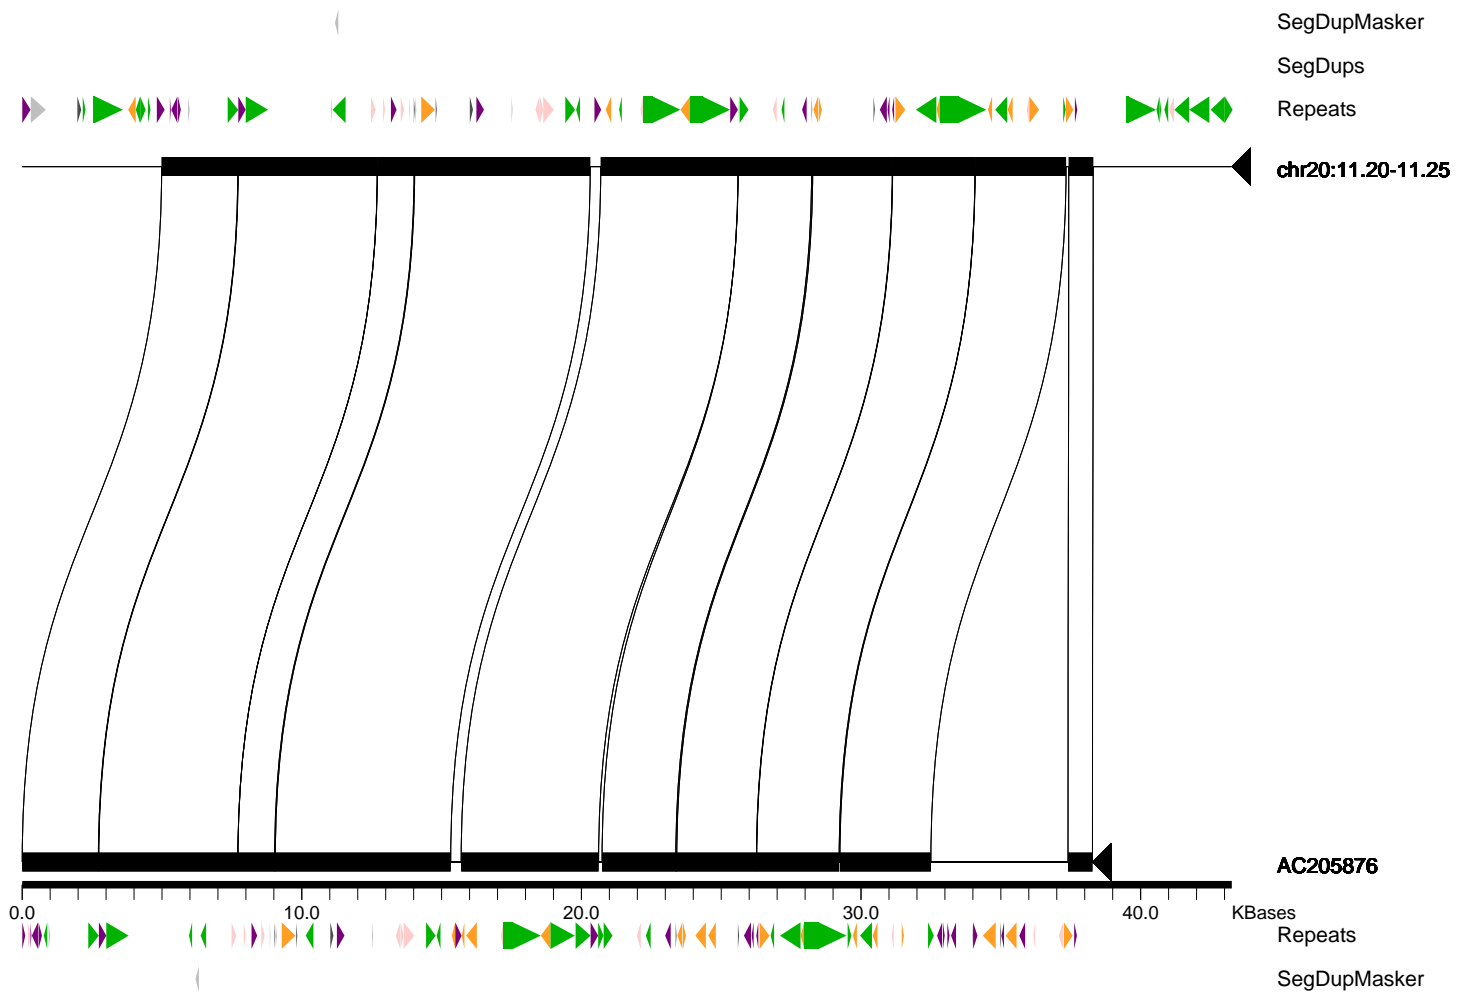

Clone: ABC9\_43827400\_J5 Accession: AC207604  
ESP Prediction: B Validation: D Mechanism: NHEJ

Other Simple Repeat Low Complexity DNA LTR LINE SINE

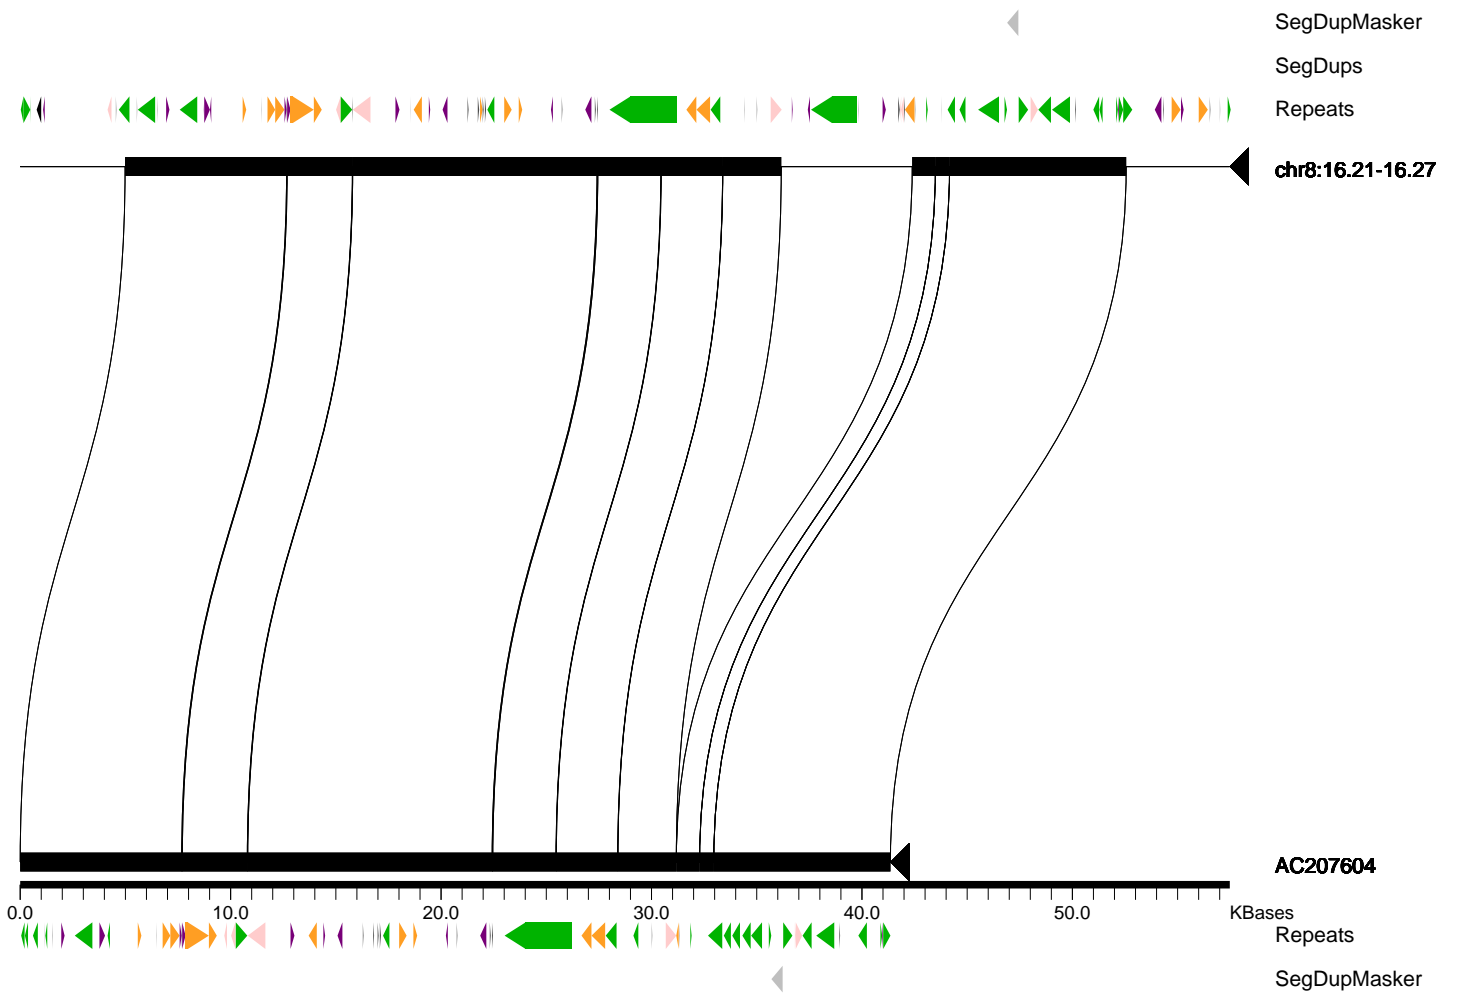

Clone: ABC9\_43875600\_C20 Accession: AC206438

ESP Prediction: B Validation: D Mechanism: NHEJ

Other Simple Repeat Low Complexity DNA LTR LINE SINE

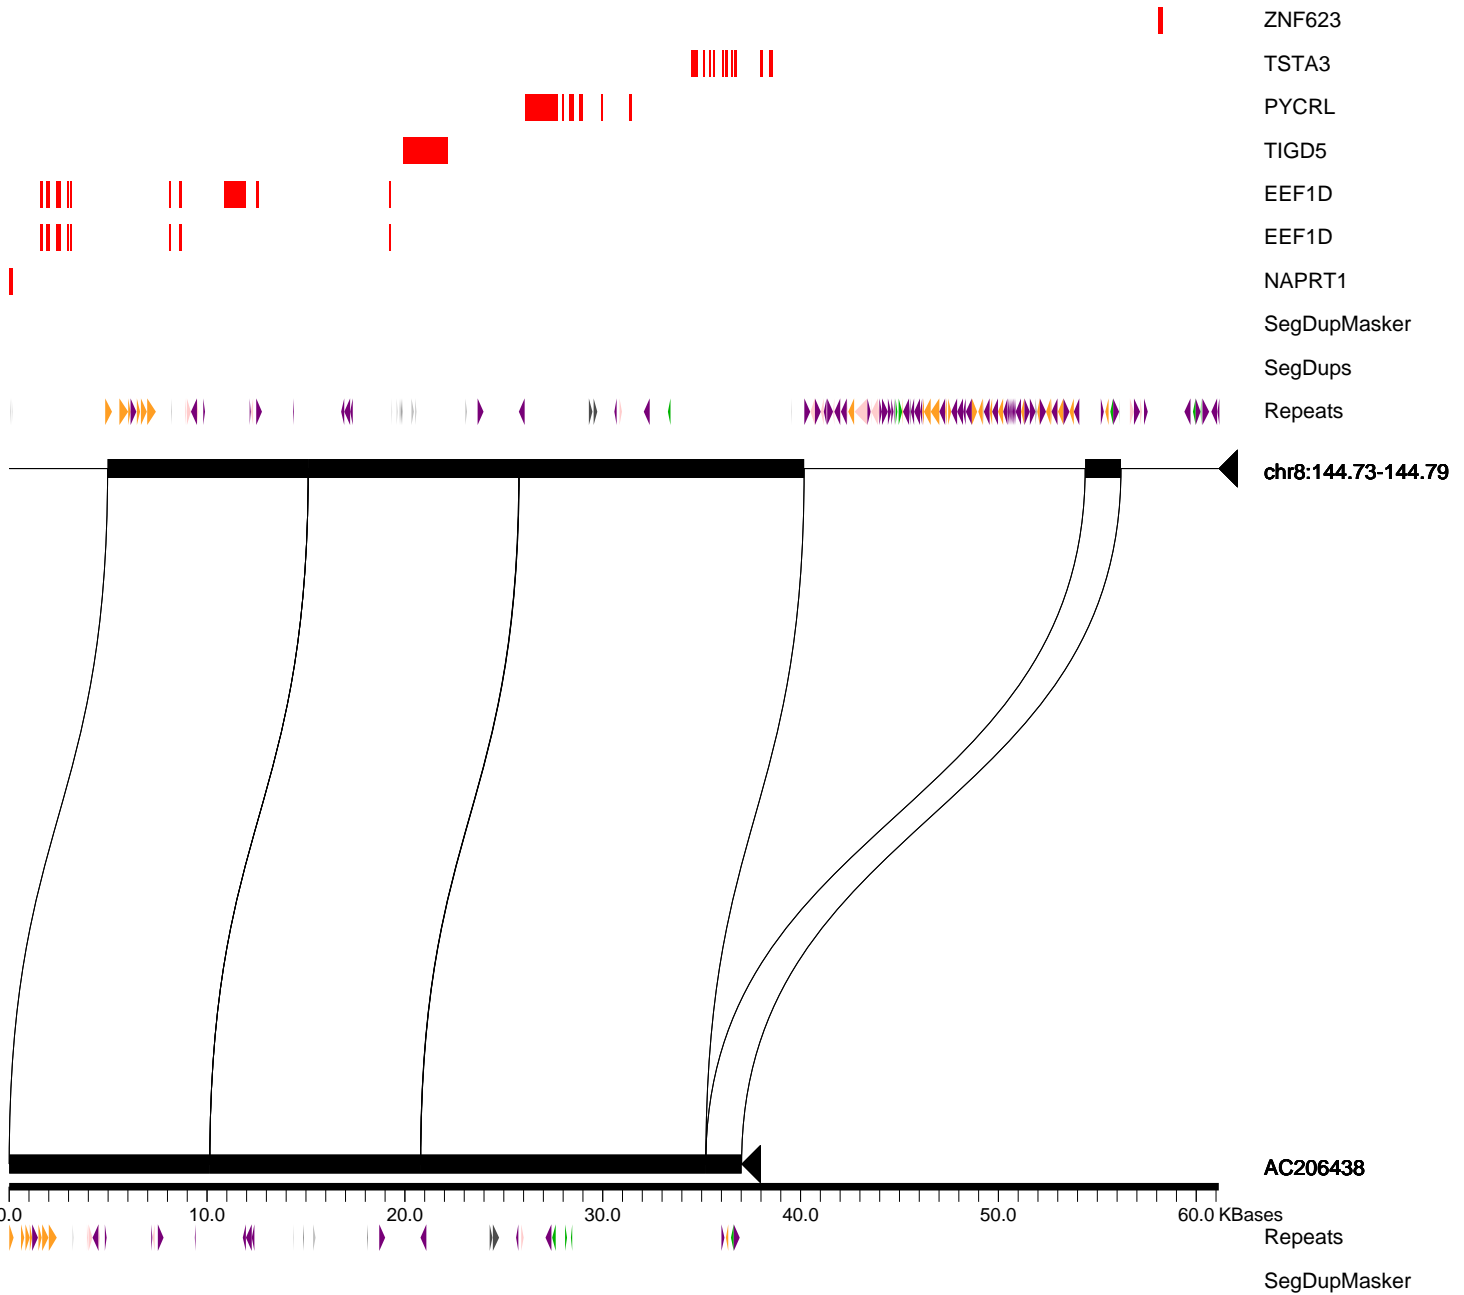

Clone: ABC9\_43881400\_K12 Accession: AC206485

ESP Prediction: B Validation: D Mechanism: NHEJ

Other Simple Repeat Low Complexity DNA LTR LINE SINE

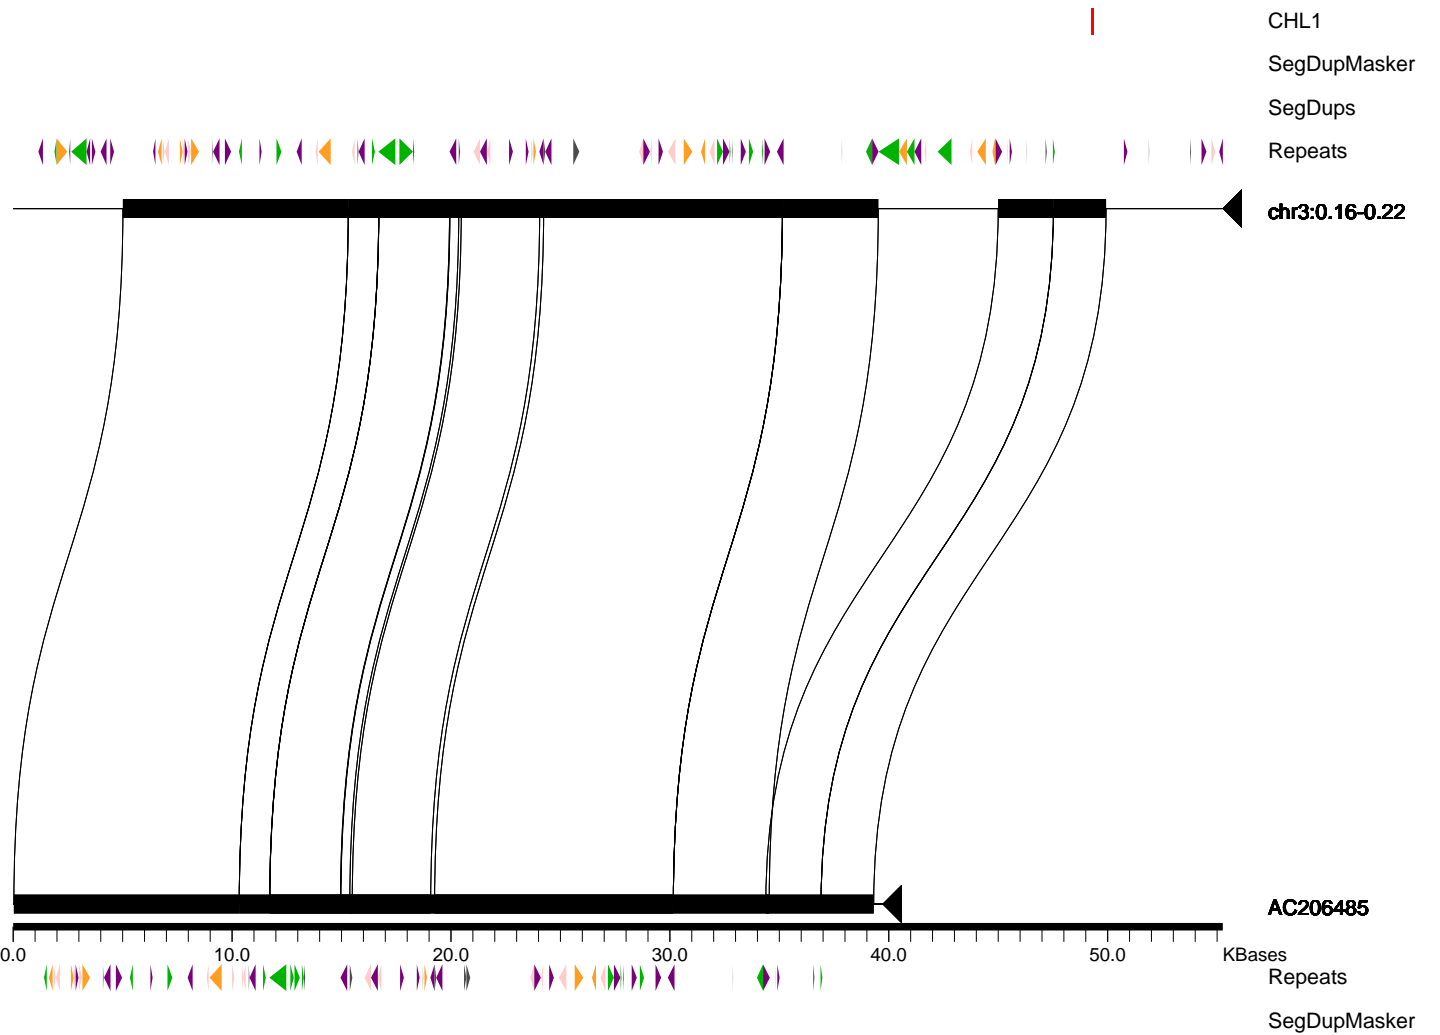

Clone: ABC9\_45921100\_F2 Accession: AC204980  
ESP Prediction: S Validation: I Mechanism: NHEJ (?)

Other Simple Repeat Low Complexity DNA LTR LINE SINE

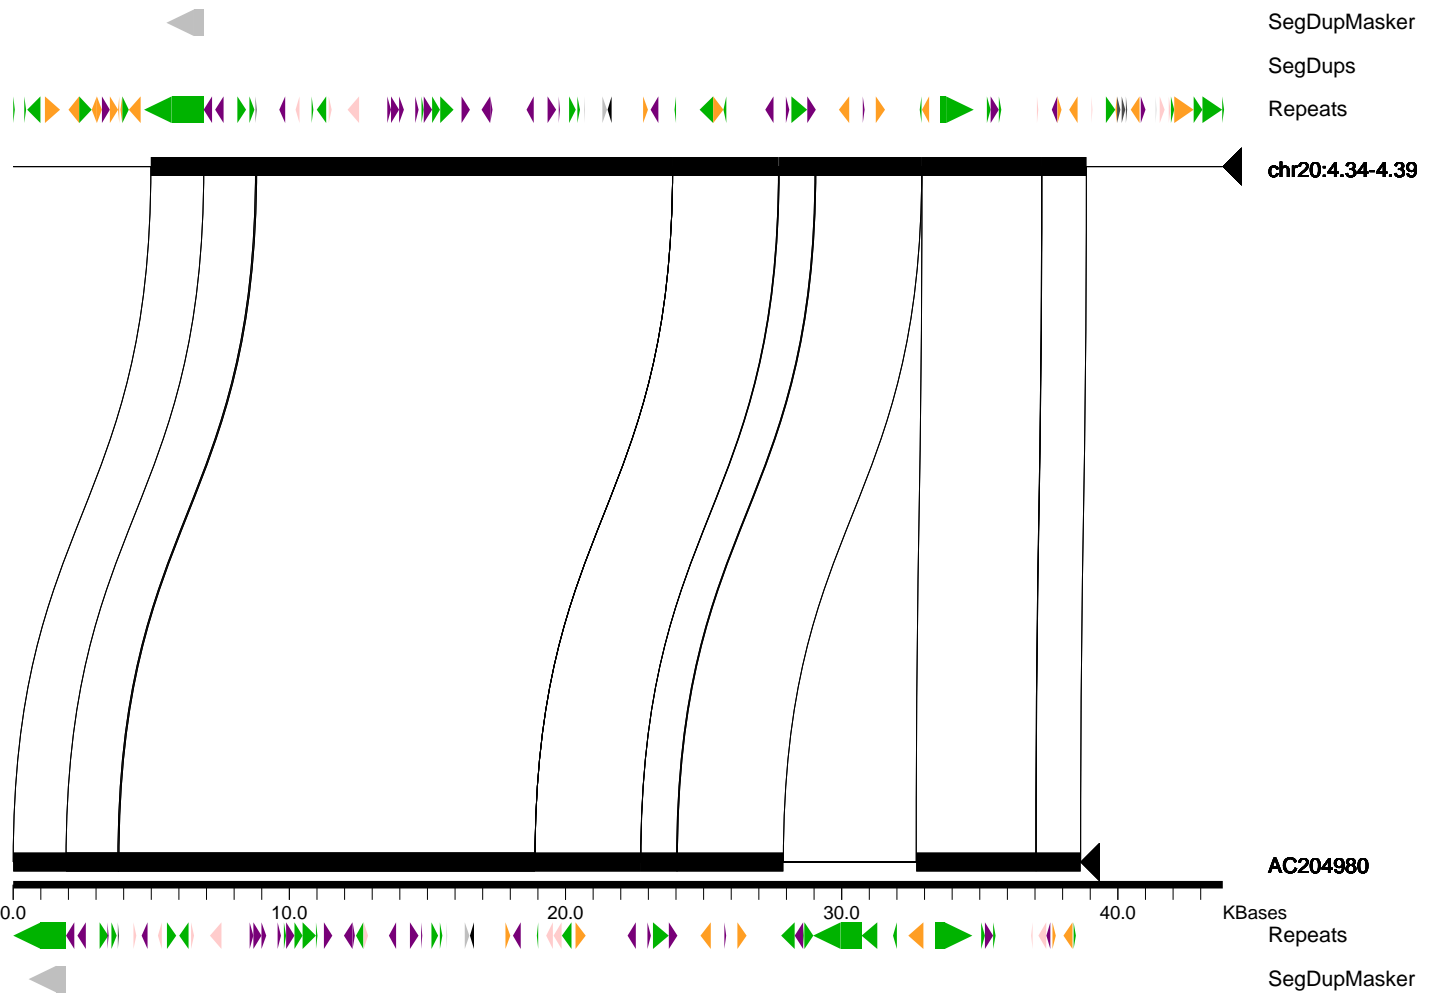

Clone: ABC10\_44449000\_L15 Accession: AC203616  
ESP Prediction: S Validation: I Mechanism: NHEJ (AS)

Other Simple Repeat Low Complexity DNA LTR LINE SINE

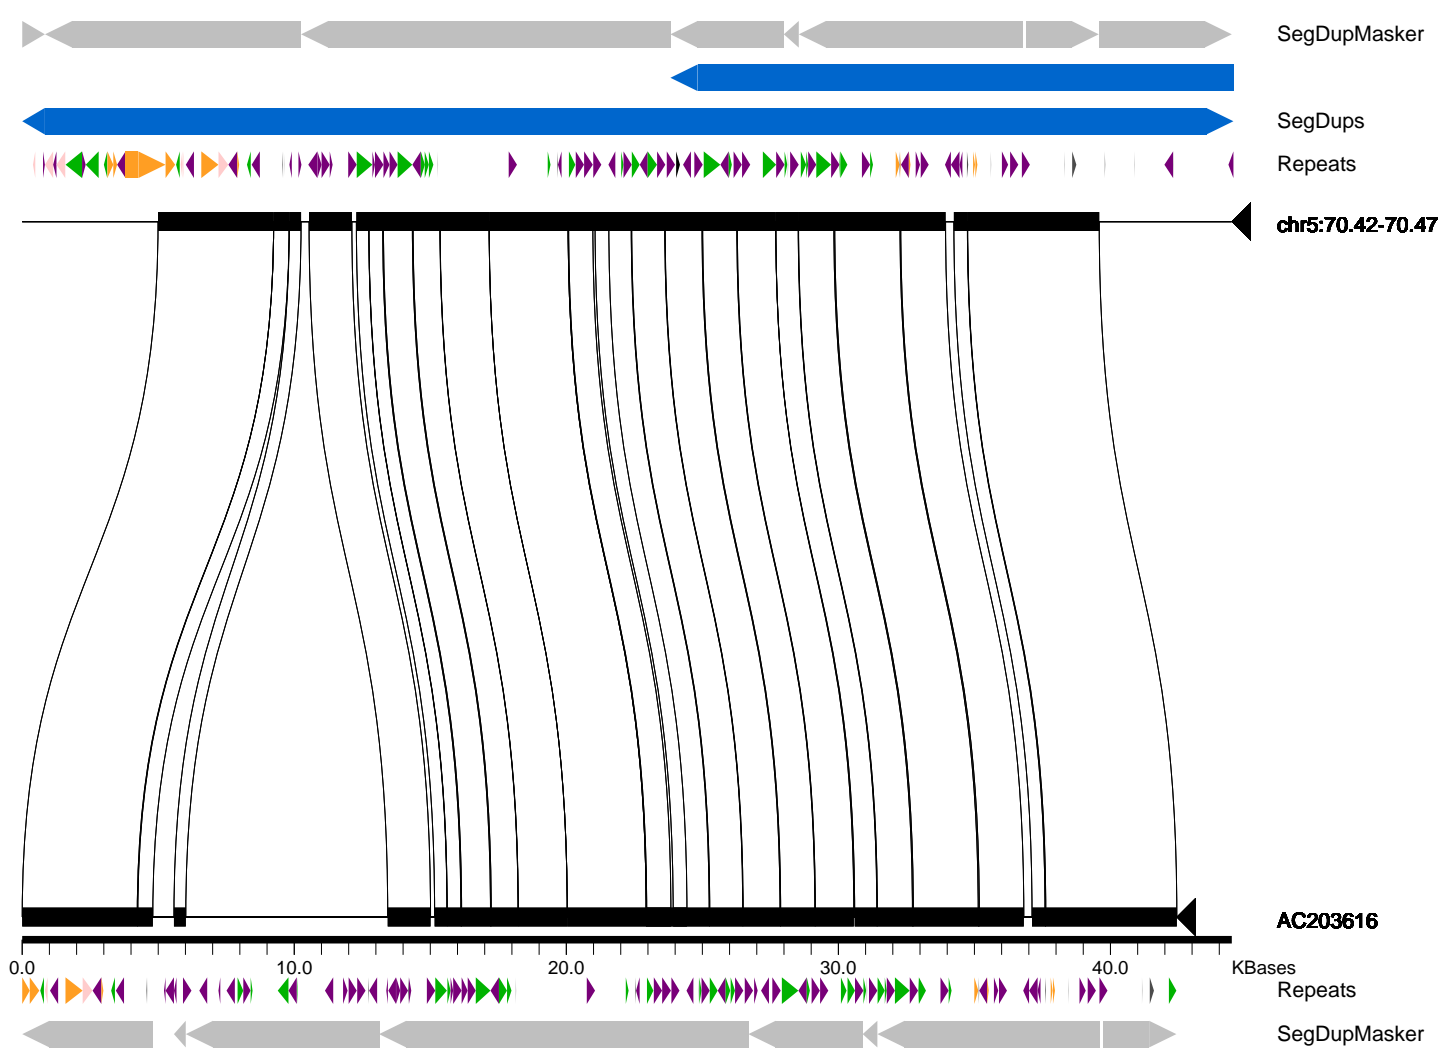

Clone: ABC10\_44454400\_K15 Accession: AC203643  
ESP Prediction: S Validation: I Mechanism: NHEJ (AS)

Other Simple Repeat Low Complexity DNA LTR LINE SINE

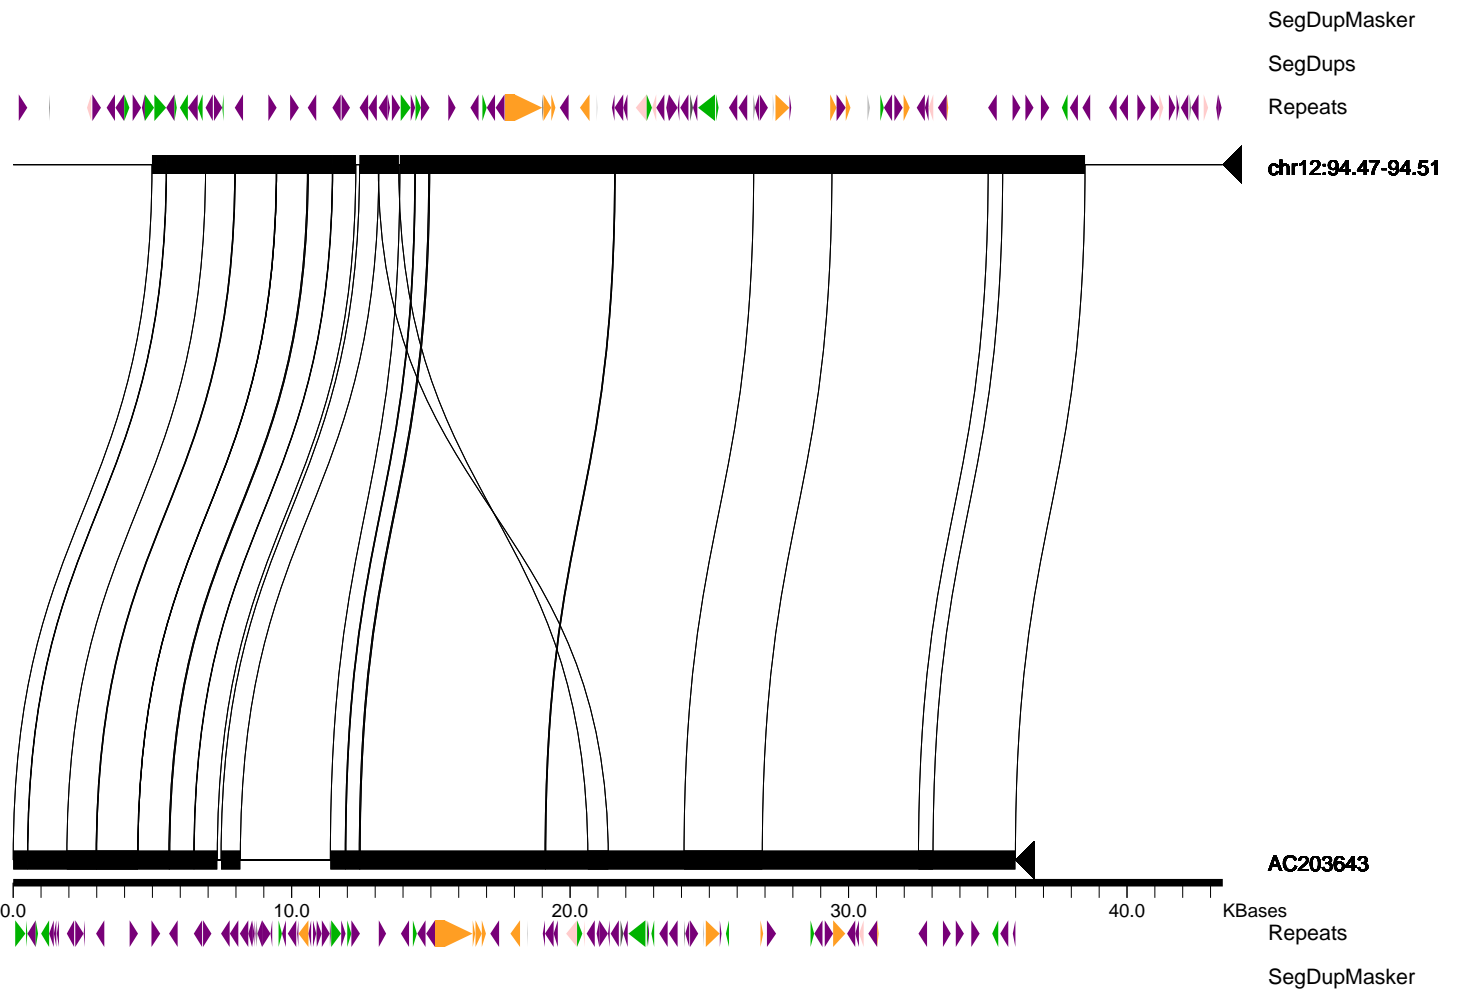



Clone: ABC10\_44454600\_L24 Accession: AC207995

ESP Prediction: S Validation: I Mechanism: NHEJ

Other Simple Repeat Low Complexity DNA LTR LINE SINE

SegDupMasker

SegDups

Repeats

chr5:161.86-161.90

AC207995

KBases

Repeats

SegDupMasker

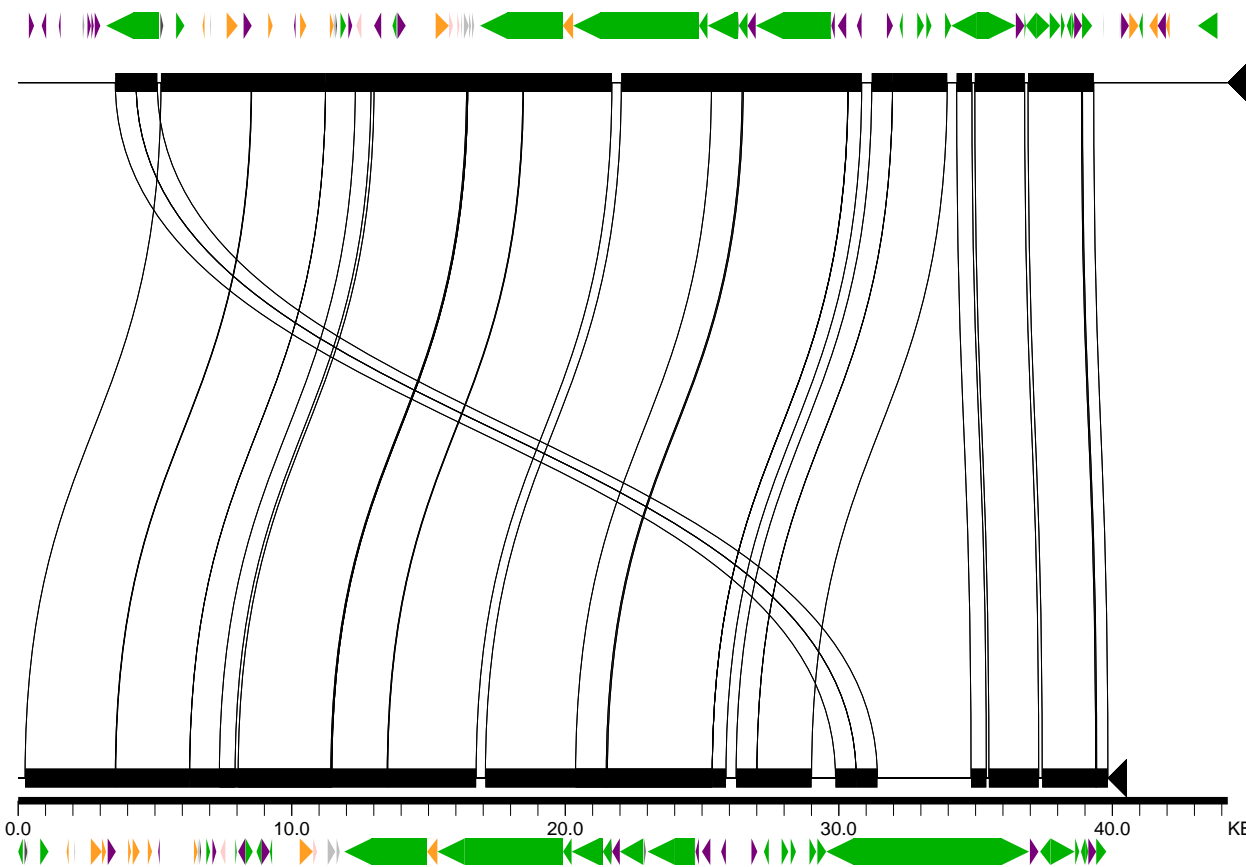

Clone: ABC10\_45505500\_C8 Accession: AC203630

ESP Prediction: S Validation: I Mechanism: NHEJ

Other Simple Repeat Low Complexity DNA LTR LINE SINE

SegDupMasker

SegDups

Repeats

chr9:24.95-25.00

AC203630

KBases

Repeats

SegDupMasker

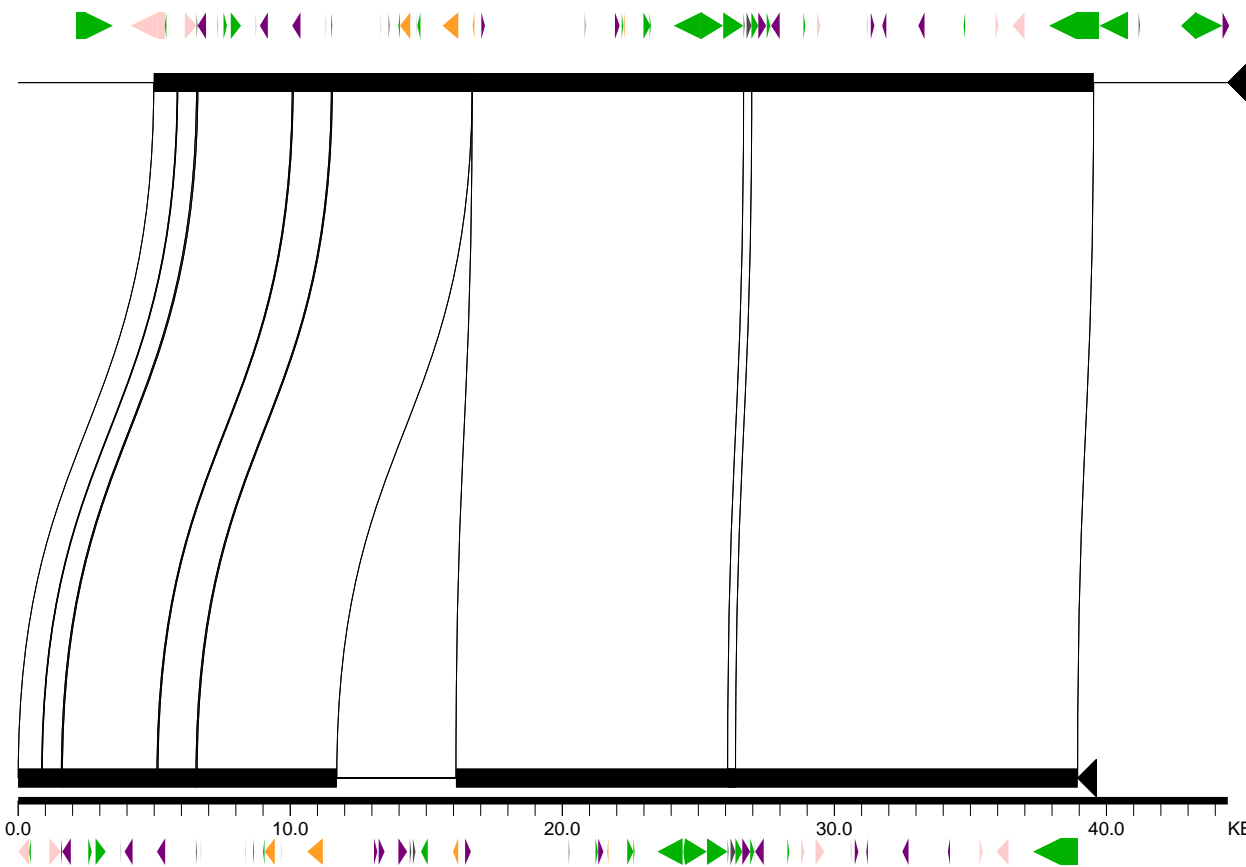

Clone: ABC10\_45508900\_B14 Accession: AC203620

ESP Prediction: B Validation: D Mechanism: NHEJ

Other Simple Repeat Low Complexity DNA LTR LINE SINE

SegDupMasker

SegDups

Repeats

chr3:178.83-178.89

AC203620

Repeats

SegDupMasker

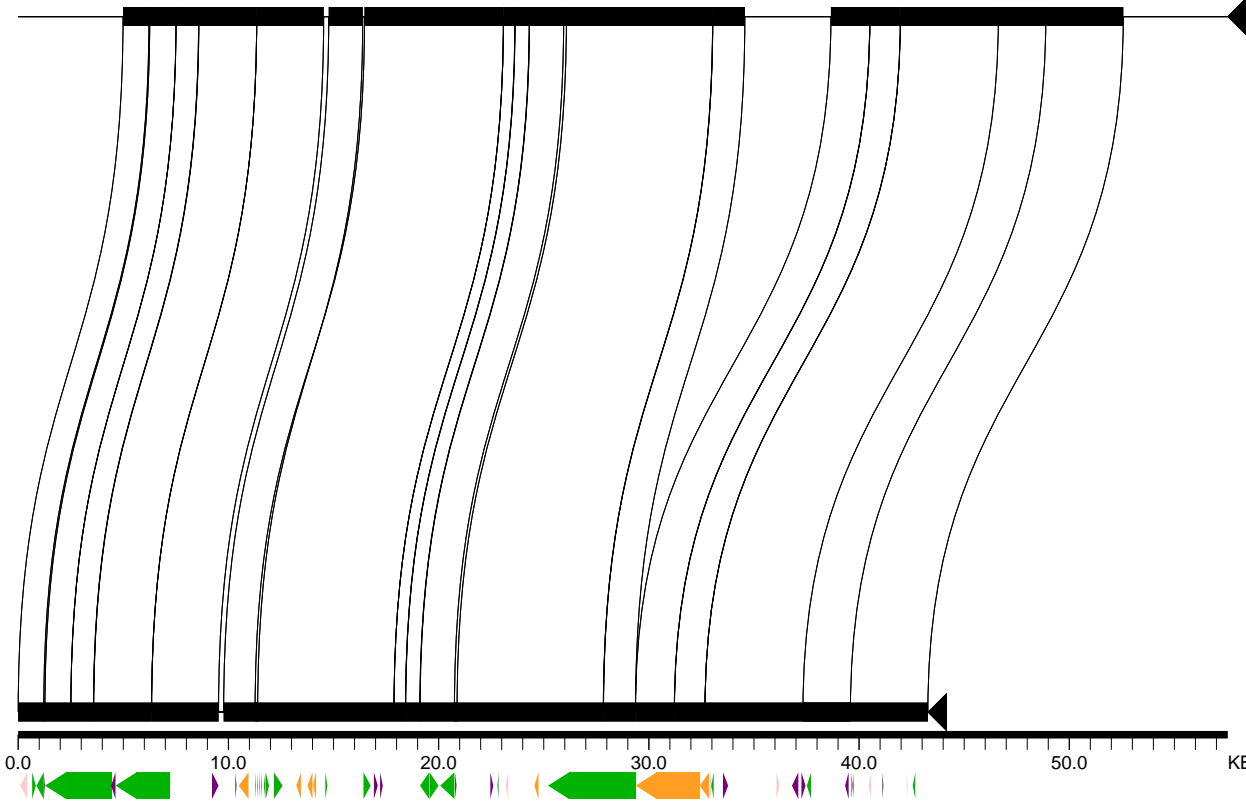

Clone: ABC10\_45513900\_P17 Accession: AC203645  
ESP Prediction: B Validation: D Mechanism: NHEJ (AS)

Other Simple Repeat Low Complexity DNA LTR LINE SINE

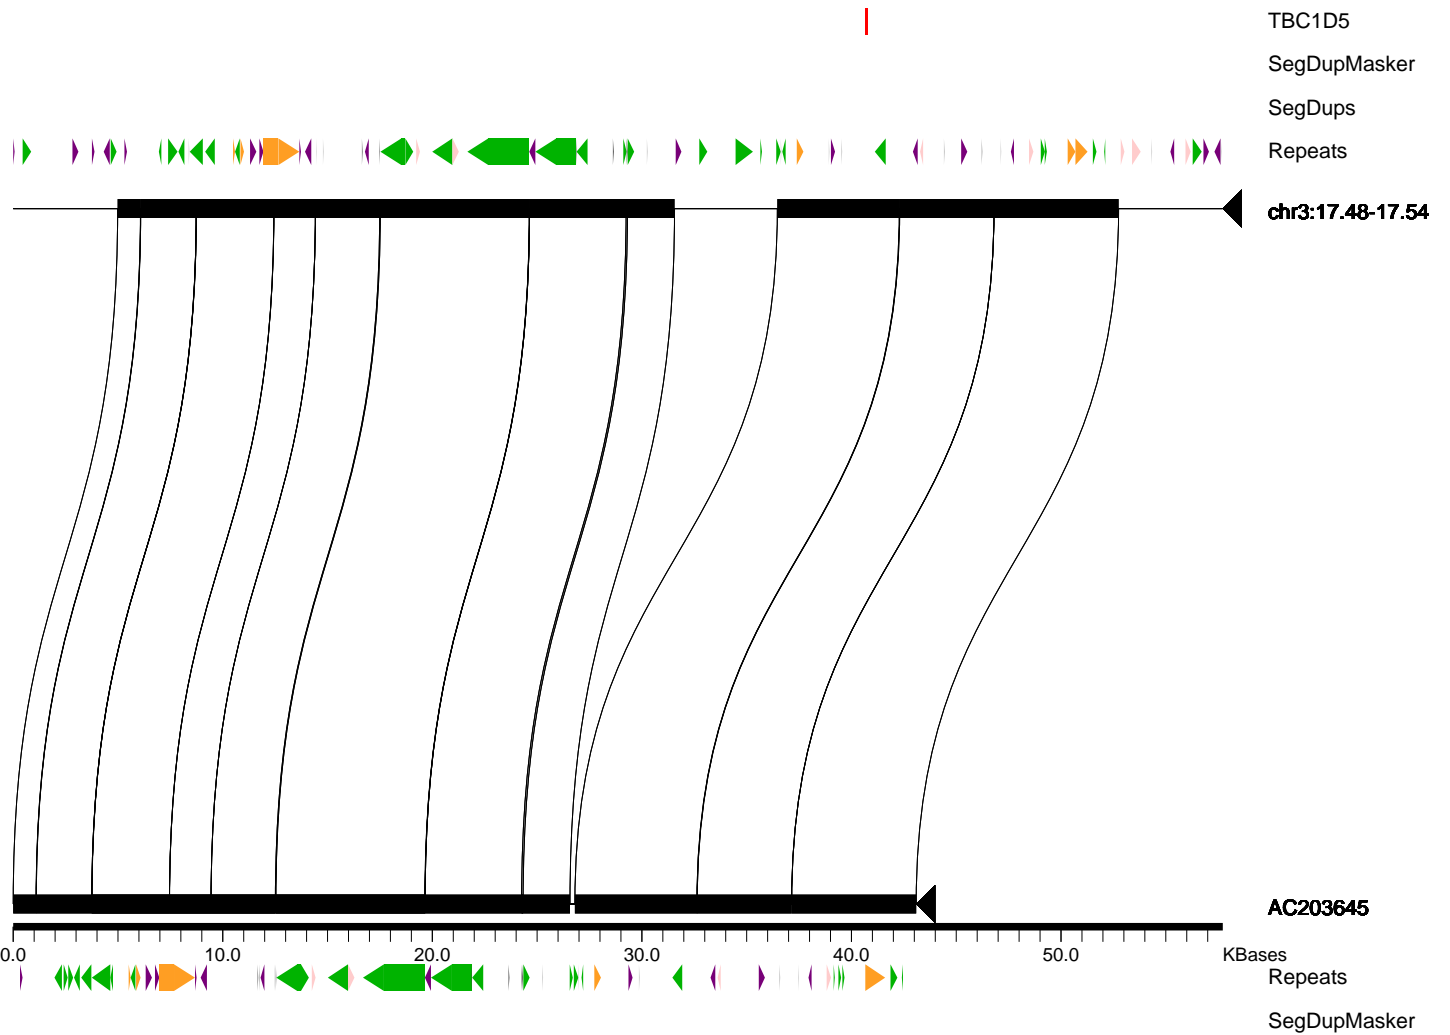

Clone: ABC9\_43896200\_K6 Accession: AC204972  
ESP Prediction: S Validation: I Mechanism: NHEJ (AS)

Other Simple Repeat Low Complexity DNA LTR LINE SINE

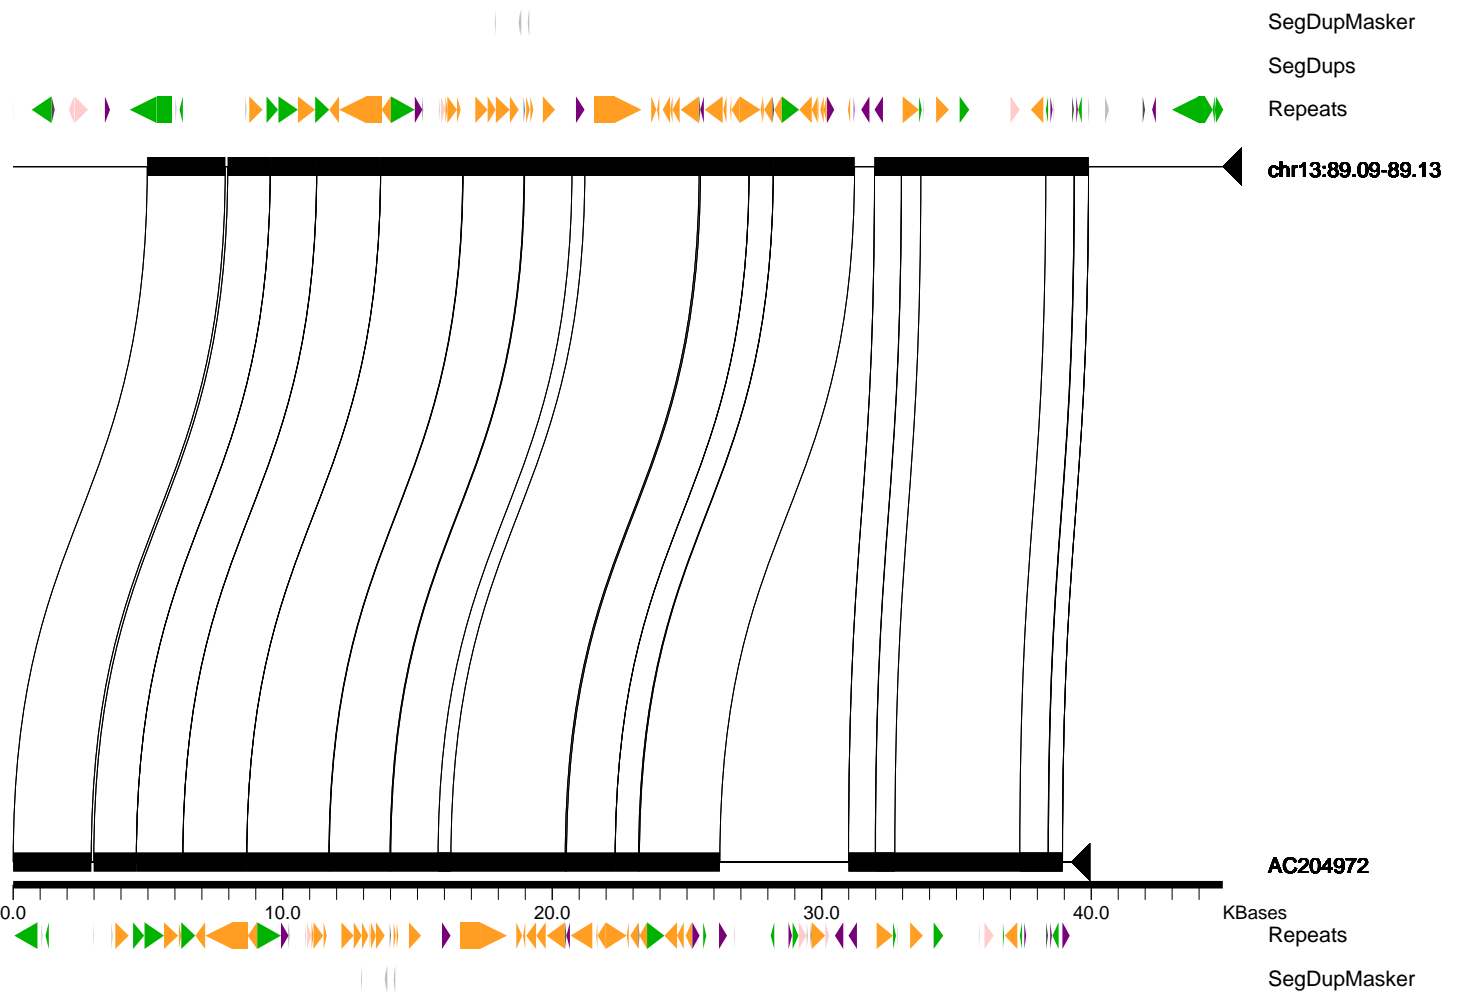

Clone: ABC9\_43990800\_K12 Accession: AC205871

ESP Prediction: B Validation: D Mechanism: NHEJ

Other Simple Repeat Low Complexity DNA LTR LINE SINE

SegDupMasker

SegDups

Repeats

chr8:115.68-115.74

AC205871

KBases

Repeats

SegDupMasker

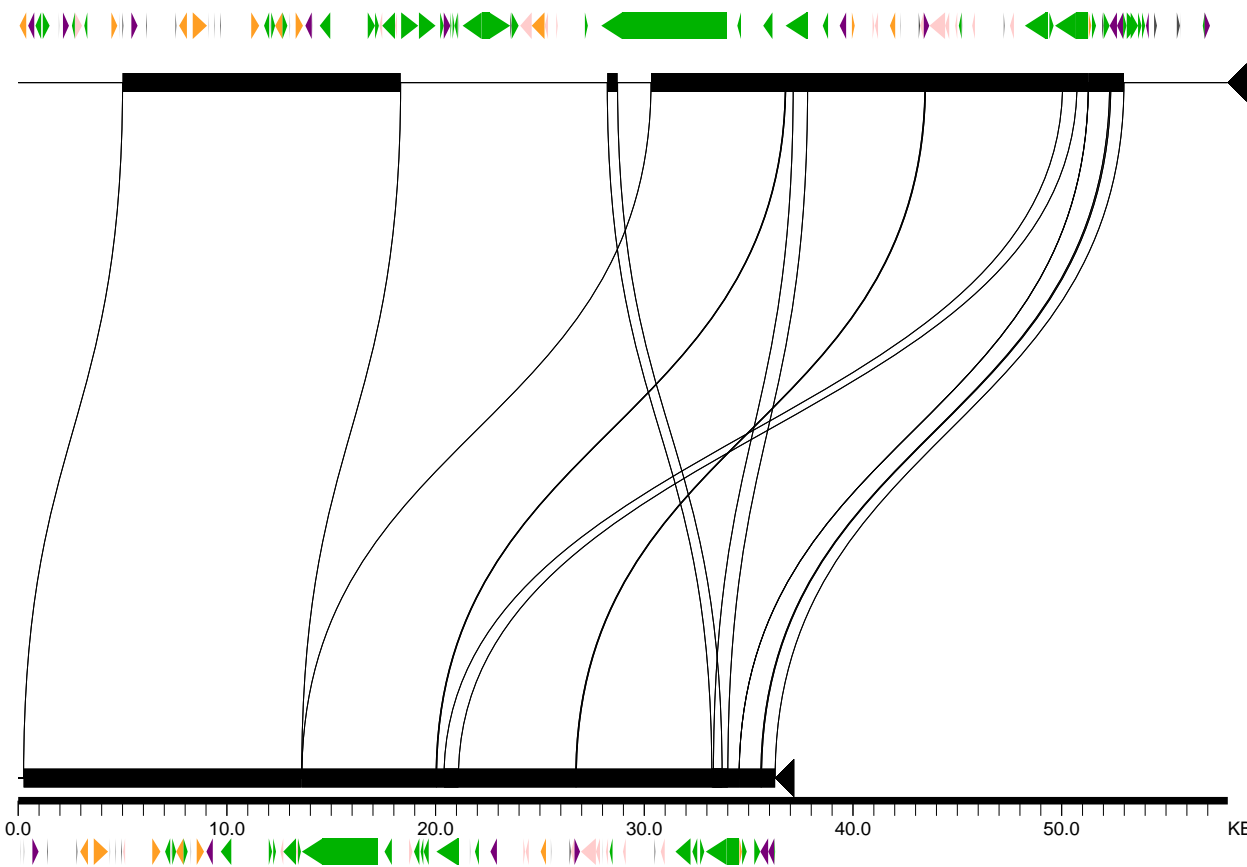

Clone: ABC10\_43645800\_E4 Accession: AC203599  
ESP Prediction: B Validation: D Mechanism: NHEJ (AS)

Other Simple Repeat Low Complexity DNA LTR LINE SINE

SegDupMasker

SegDups

Repeats

chr12:45.27-45.33

AC203599

KBases

Repeats

SegDupMasker

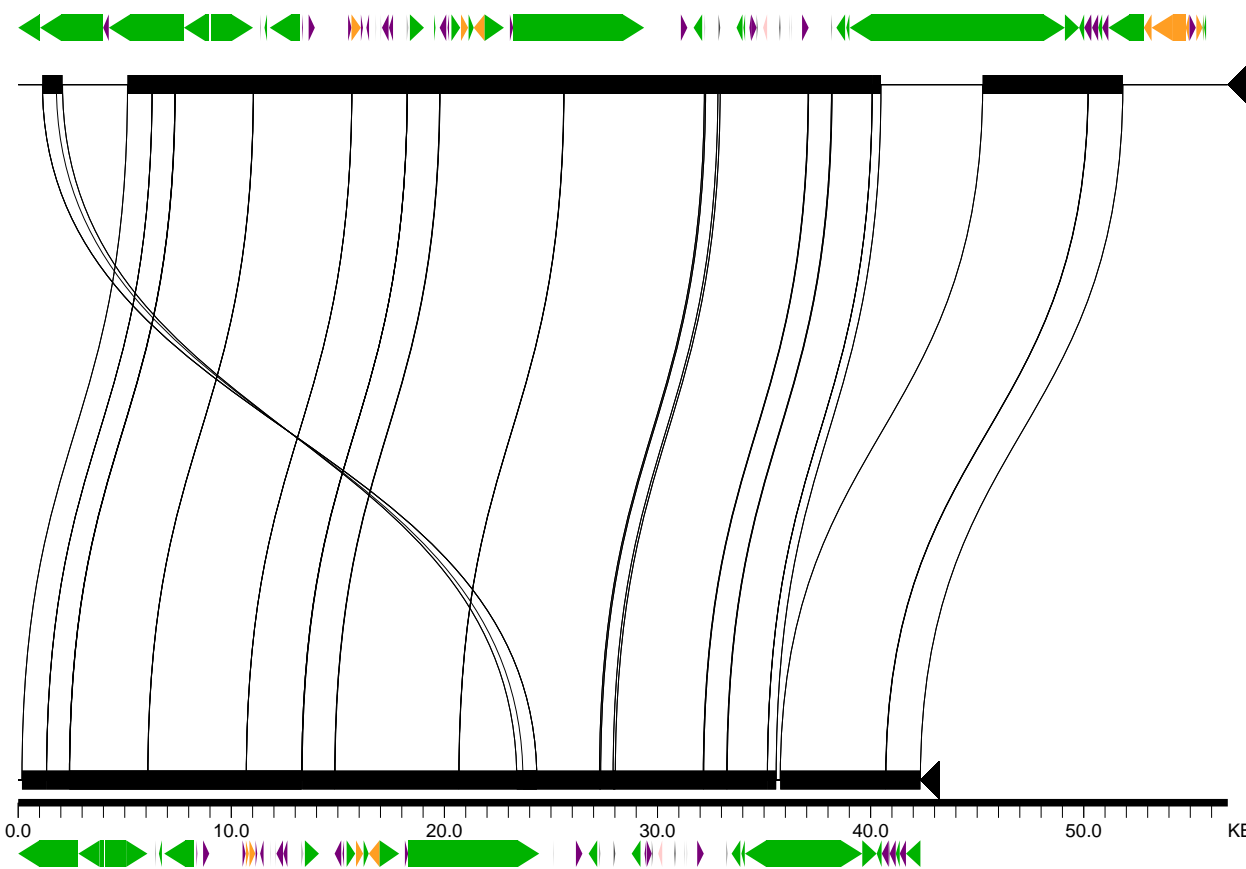

Clone: ABC10\_43667200\_A22 Accession: AC203632

ESP Prediction: B Validation: D Mechanism: NHEJ?

Other Simple Repeat Low Complexity DNA LTR LINE SINE

SegDupMasker

SegDups

Repeats

chr18:50.19-50.25

AC203632

KBases

Repeats

SegDupMasker

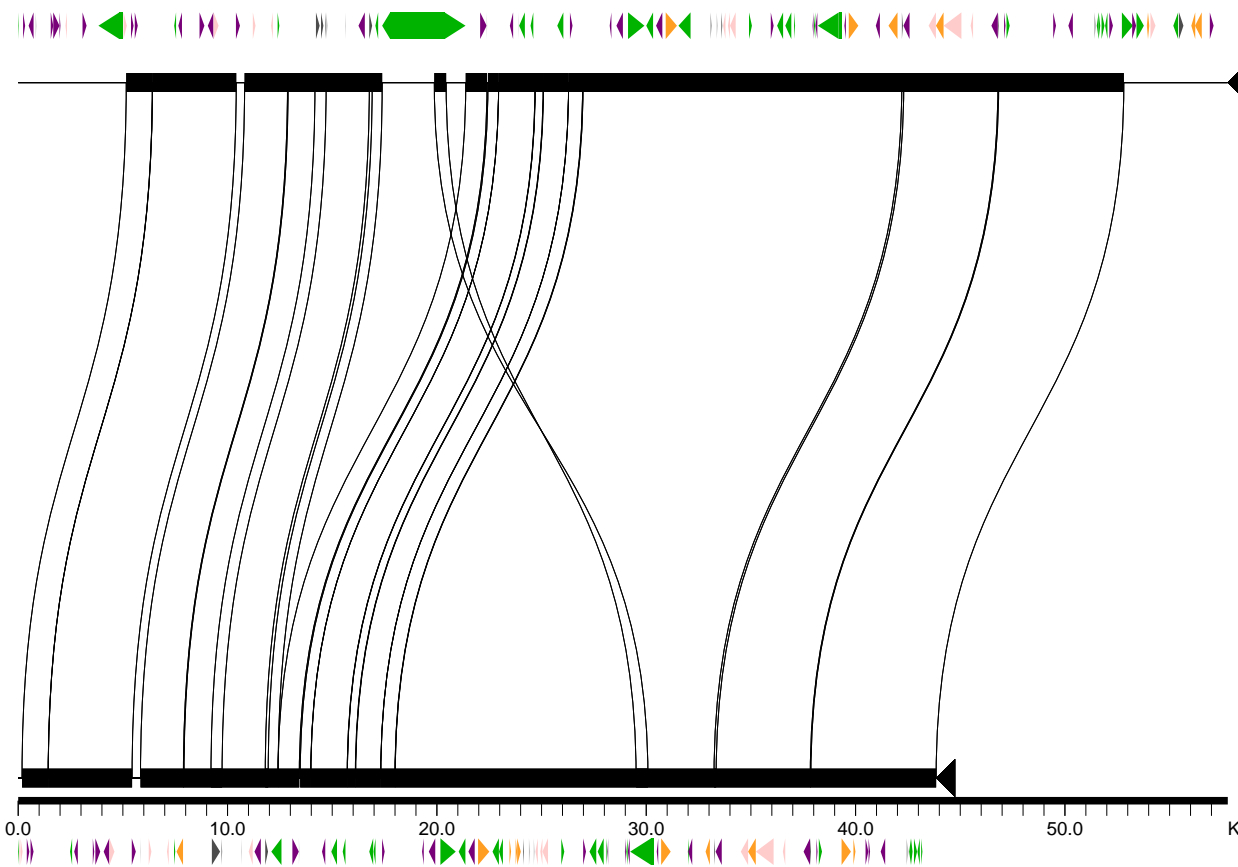



Clone: ABC10\_44051200\_O13 Accession: AC204963

ESP Prediction: S Validation: I Mechanism: NHEJ?

Other Simple Repeat Low Complexity DNA LTR LINE SINE

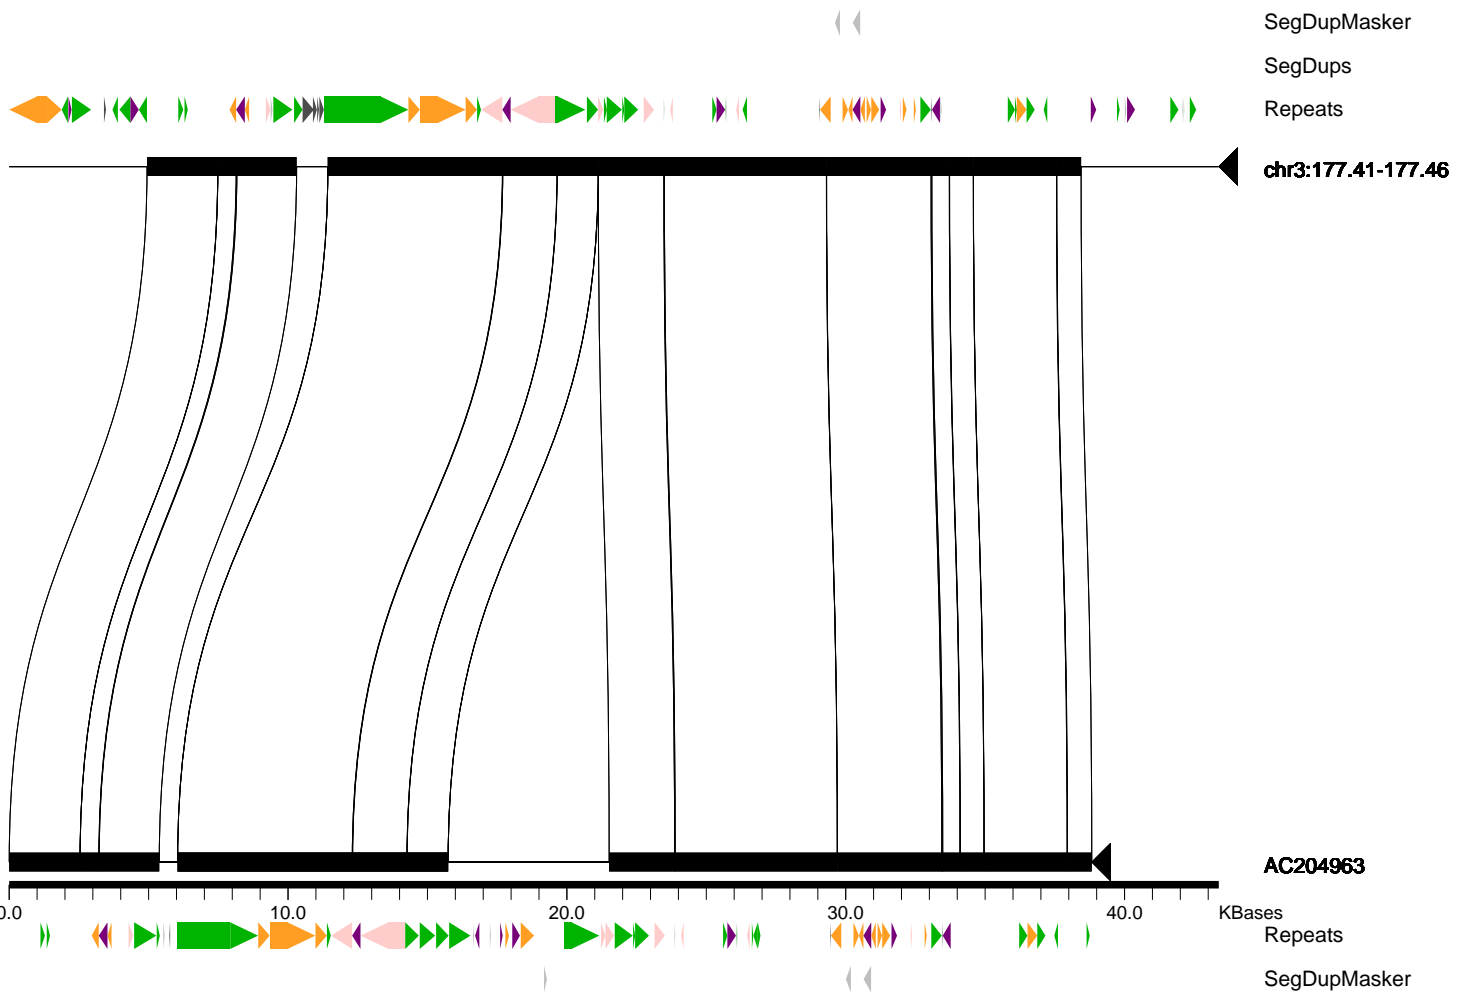

Clone: ABC10\_44116800\_M4 Accession: AC203590

ESP Prediction: B Validation: D Mechanism: NHEJ (AS)

Other Simple Repeat Low Complexity DNA LTR LINE SINE

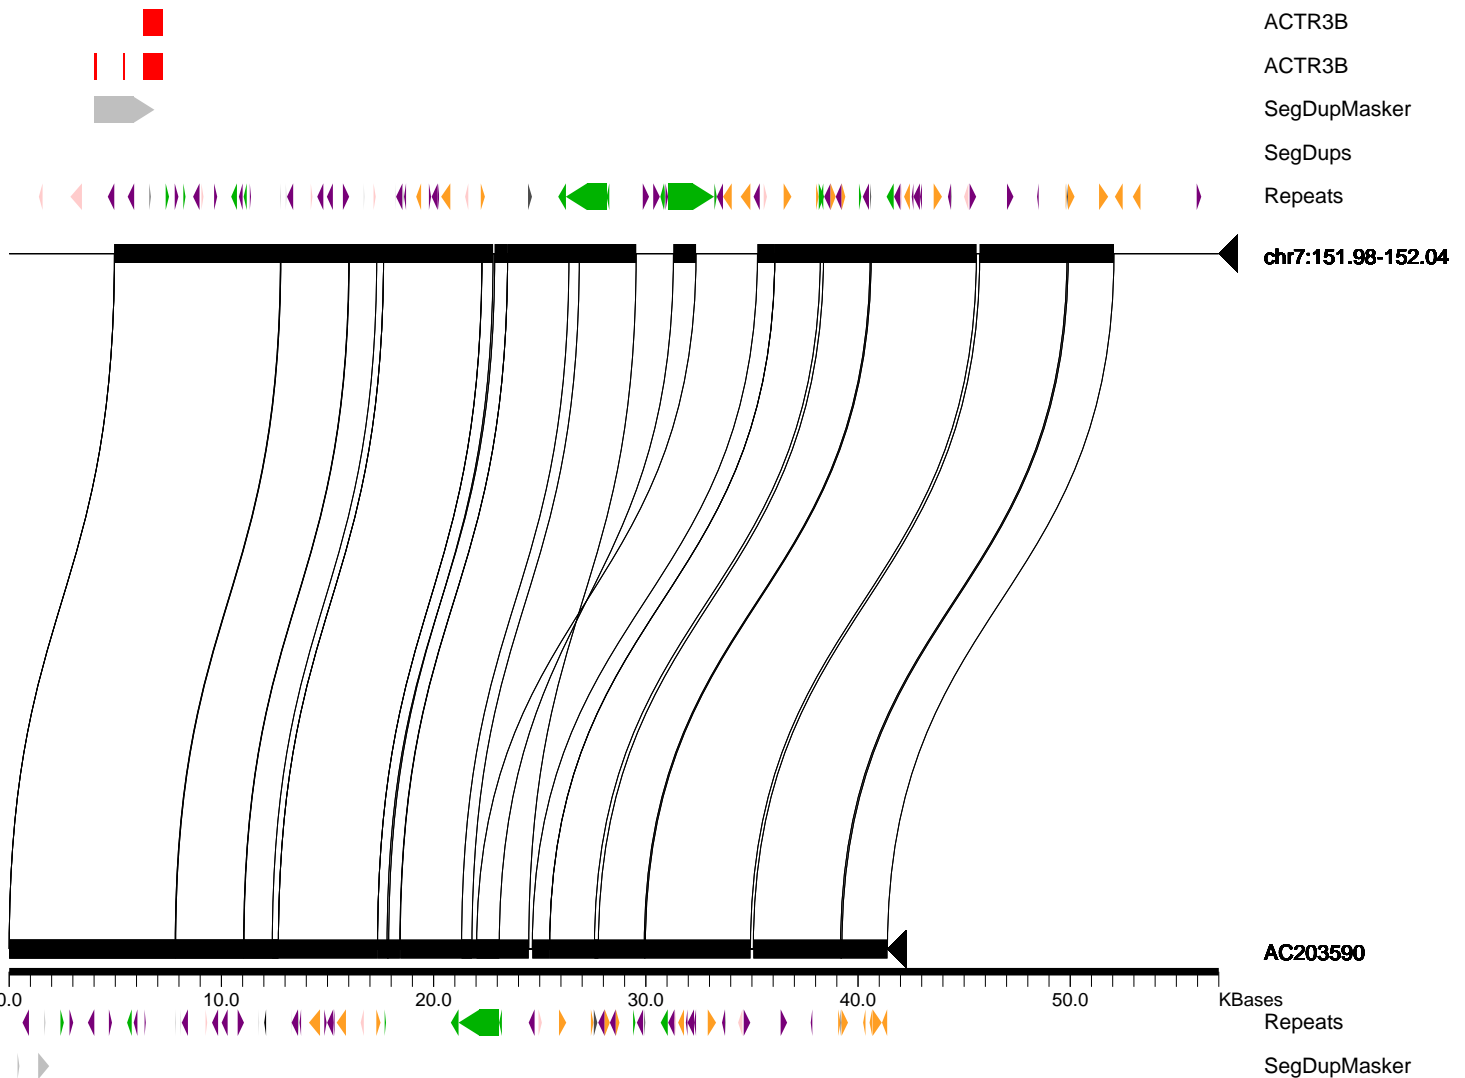

Clone: ABC10\_44139700\_G12 Accession: AC203605  
ESP Prediction: S Validation: I Mechanism: NHEJ (AS)

Other Simple Repeat Low Complexity DNA LTR LINE SINE

SegDupMasker

SegDups

Repeats

chr12:85.12-85.16

AC203605

KBases

Repeats

SegDupMasker

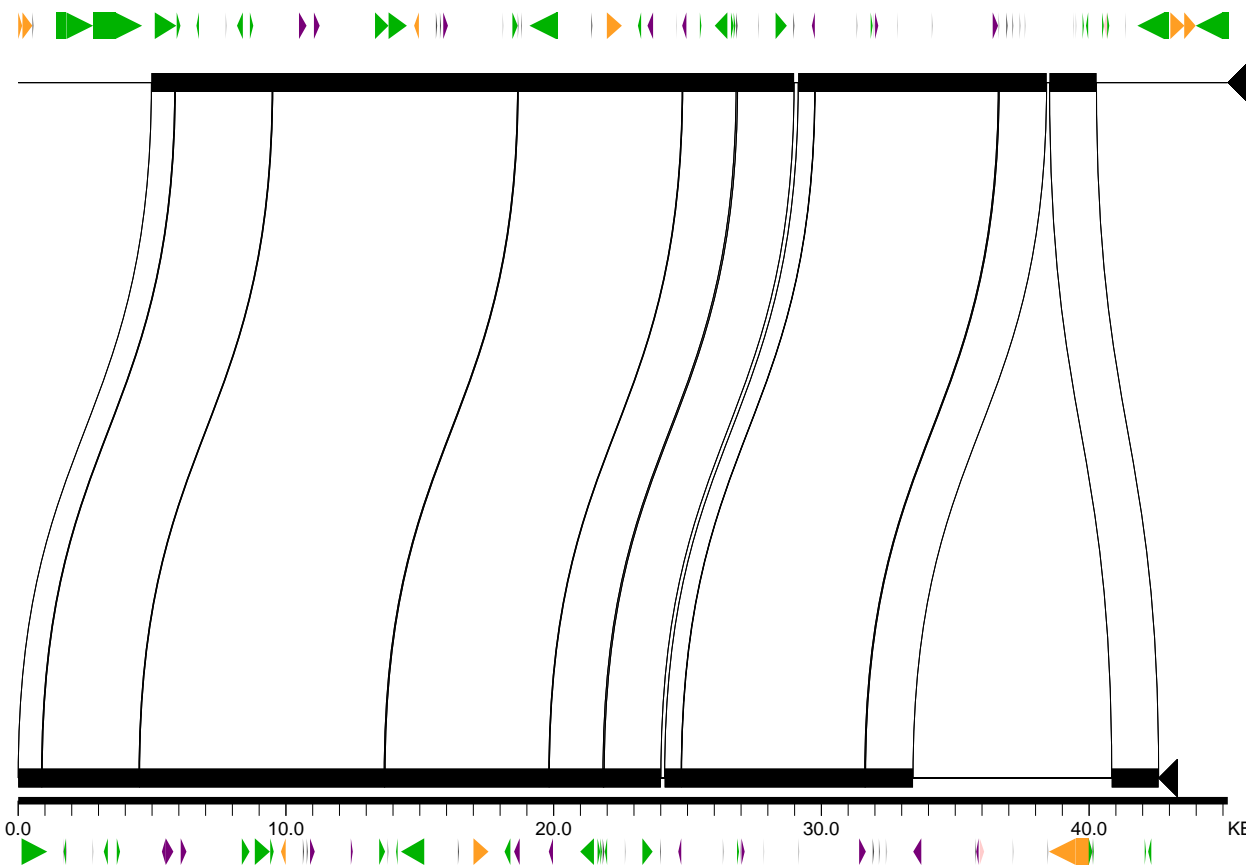

Clone: ABC10\_44139700\_G6 Accession: AC203611  
ESP Prediction: B Validation: D Mechanism: NHEJ (AS)

Other Simple Repeat Low Complexity DNA LTR LINE SINE

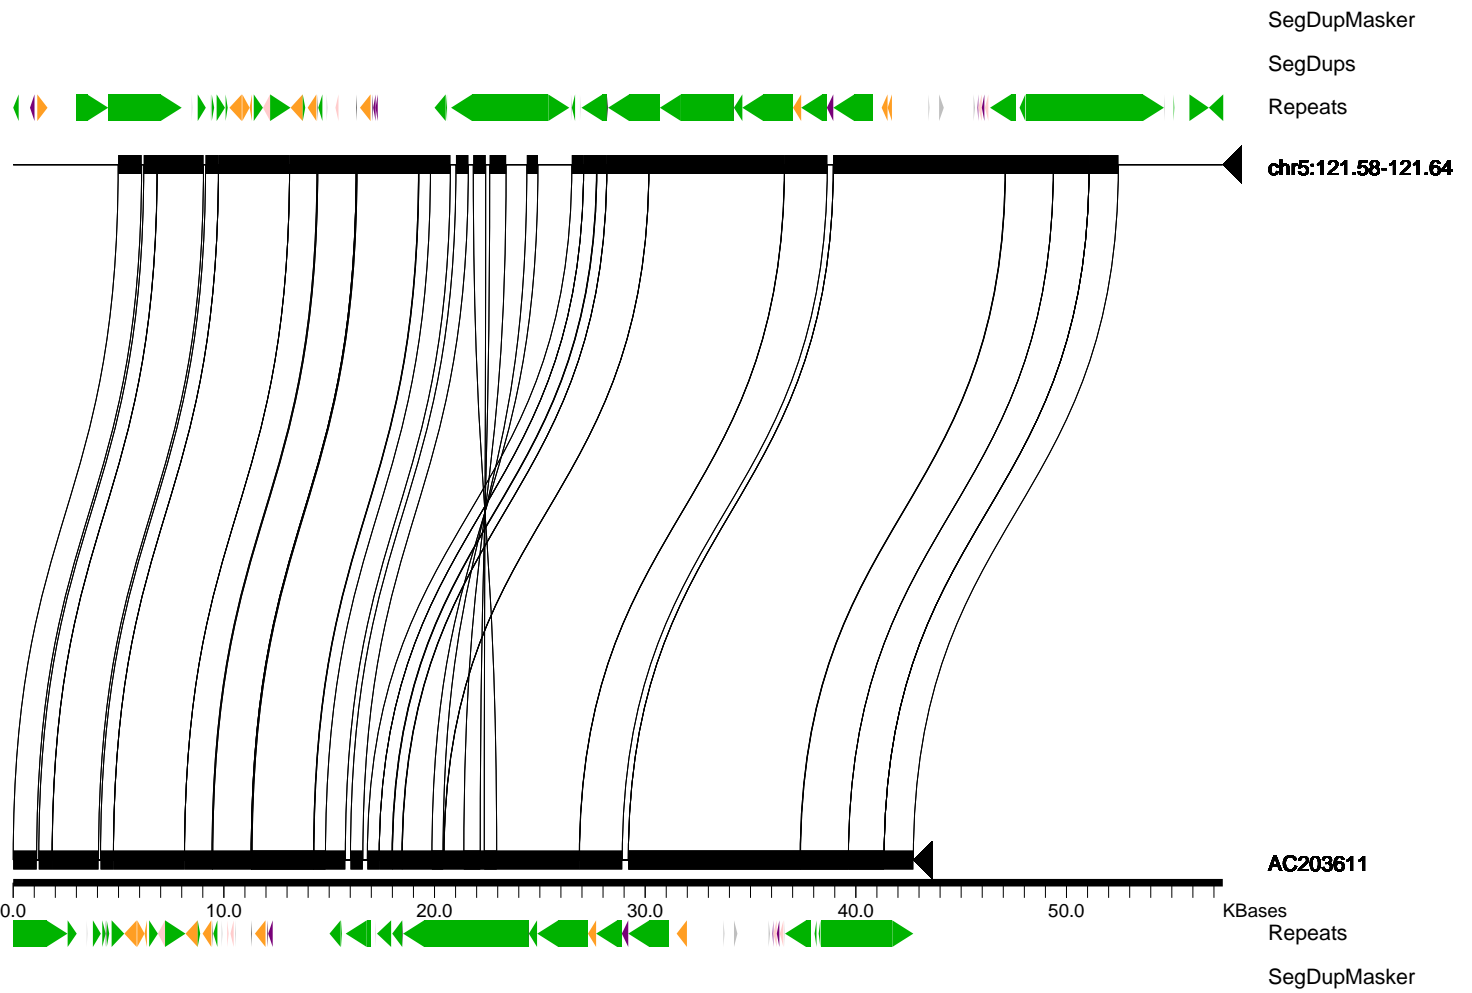

Clone: ABC10\_44140400\_N20 Accession: AC207170  
ESP Prediction: B Validation: D Mechanism: NHEJ (AS)

Other Simple Repeat Low Complexity DNA LTR LINE SINE

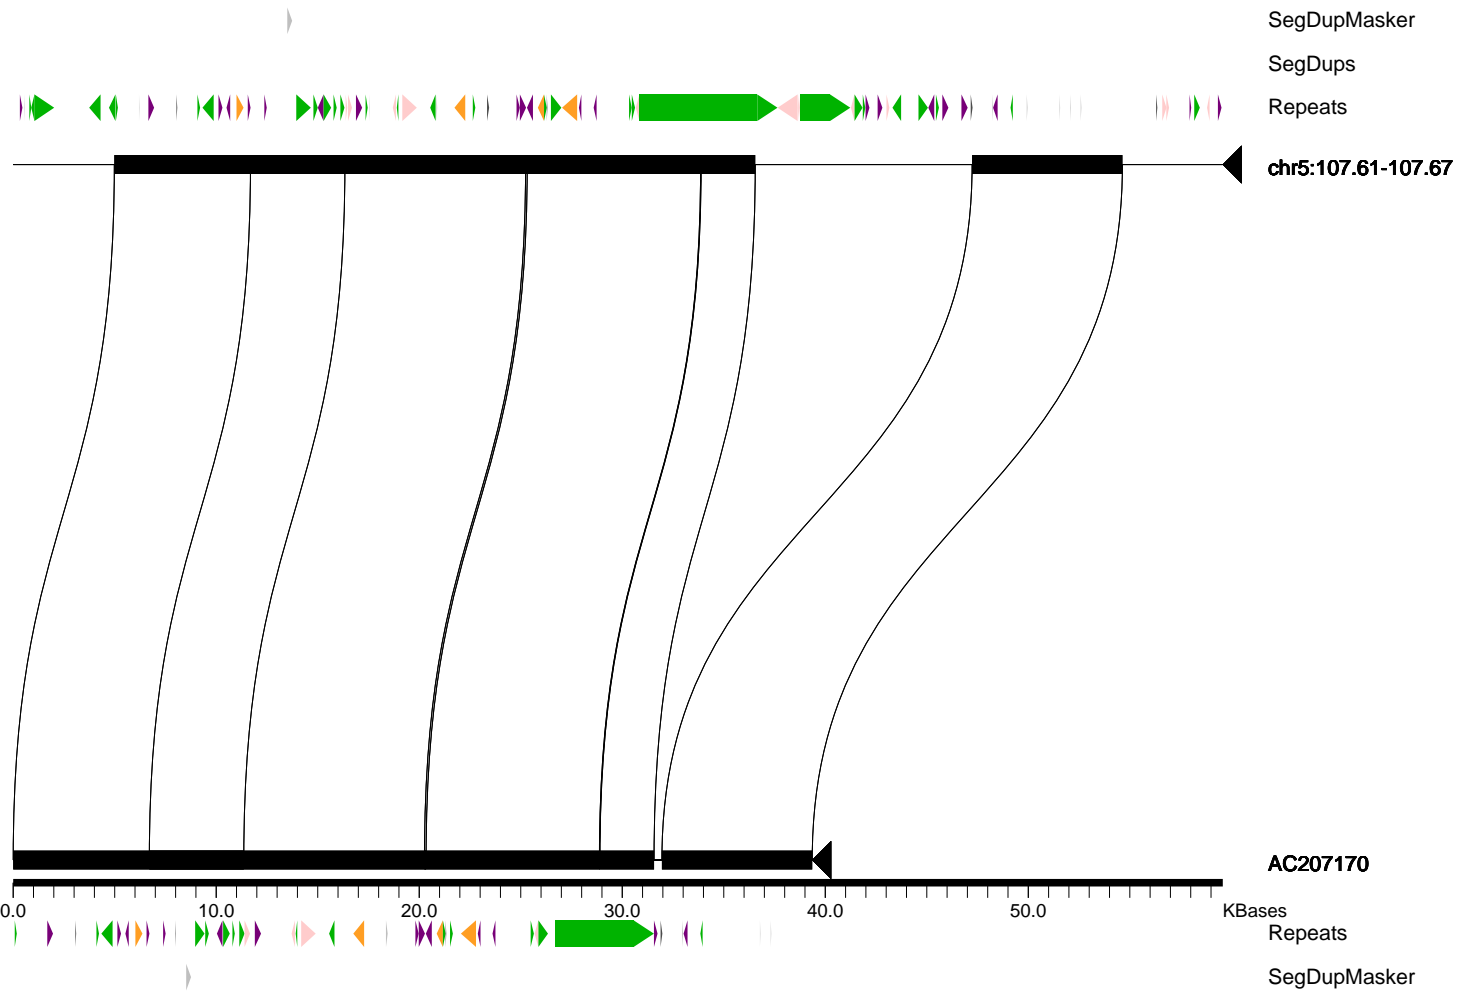

Clone: ABC10\_44142000\_M6 Accession: AC204959

ESP Prediction: B Validation: D Mechanism: NHEJ

Other Simple Repeat Low Complexity DNA LTR LINE SINE

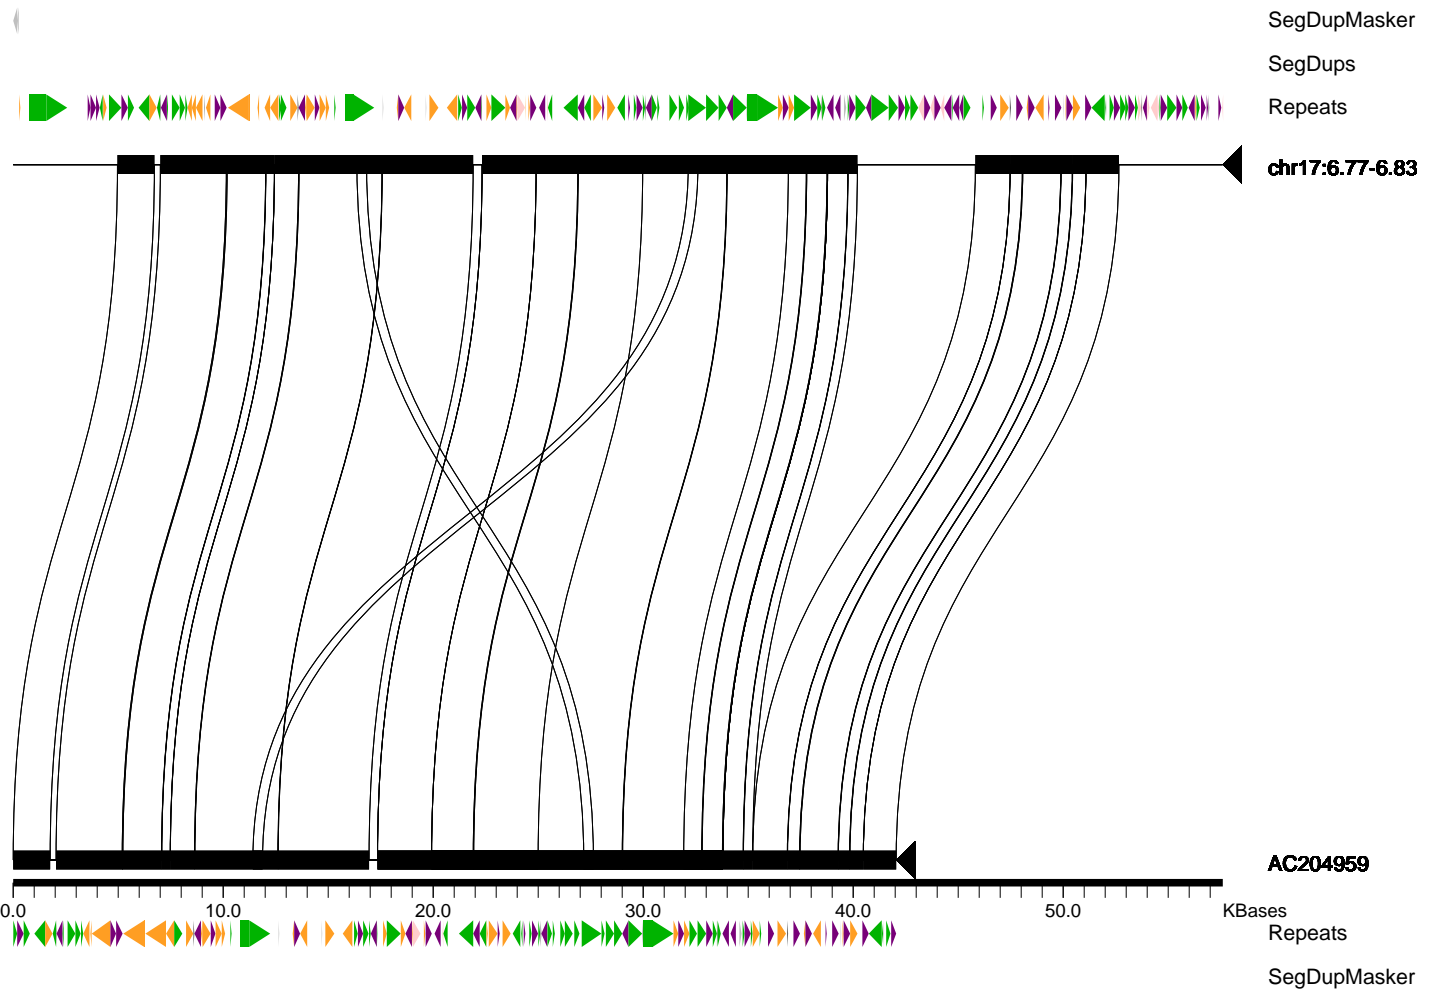

Clone: ABC10\_44477300\_F21 Accession: AC203665  
ESP Prediction: S Validation: I Mechanism: NHEJ (AS)

Other Simple Repeat Low Complexity DNA LTR LINE SINE

SegDupMasker

SegDups

Repeats

chr16:26.08-26.12

AC203665

KBases

Repeats

SegDupMasker

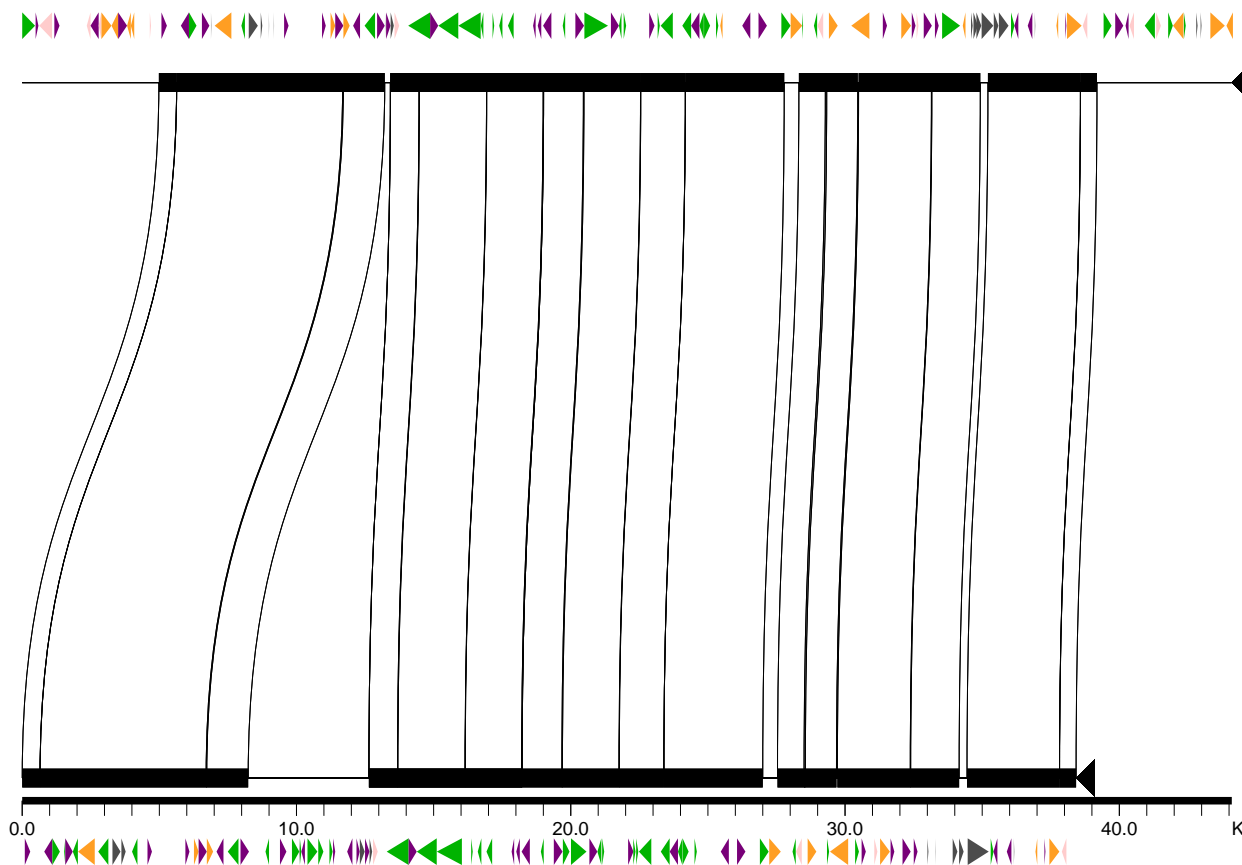

Clone: ABC10\_44479500\_E20 Accession: AC203589

ESP Prediction: B Validation: D Mechanism: NHEJ

Other Simple Repeat Low Complexity DNA LTR LINE SINE

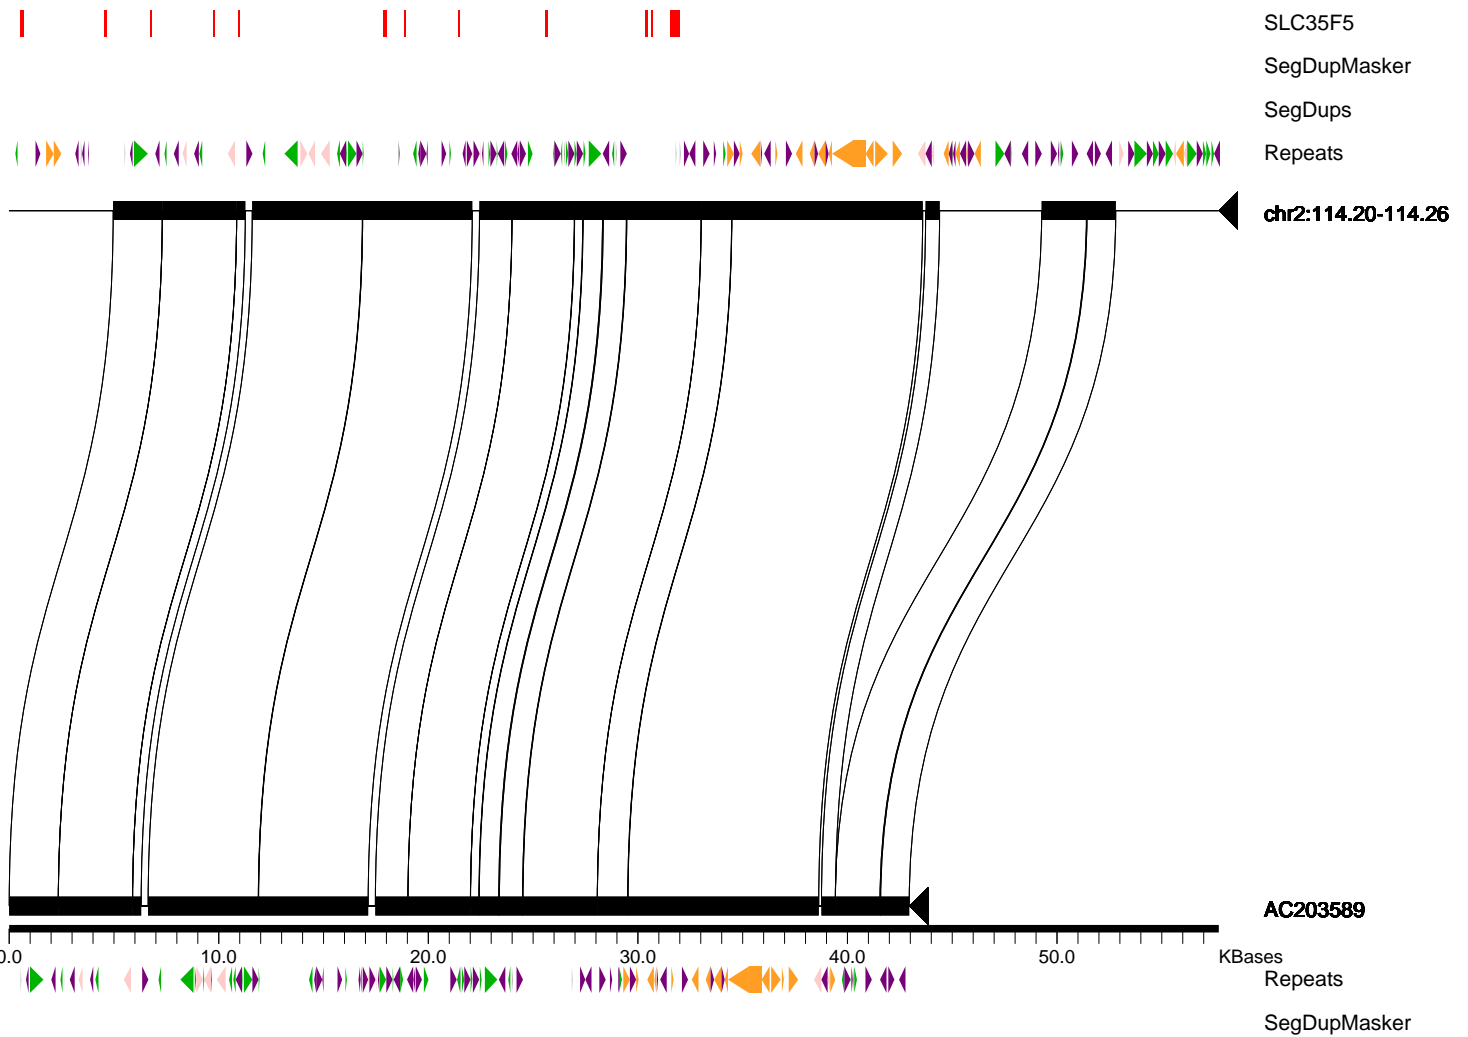



Clone: ABC10\_44480600\_H20 Accession: AC203636  
ESP Prediction: S Validation: I Mechanism: NHEJ (AS)

Other Simple Repeat Low Complexity DNA LTR LINE SINE

SegDupMasker

SegDups

Repeats

chr7:140.63-140.67

AC203636

KBases

Repeats

SegDupMasker

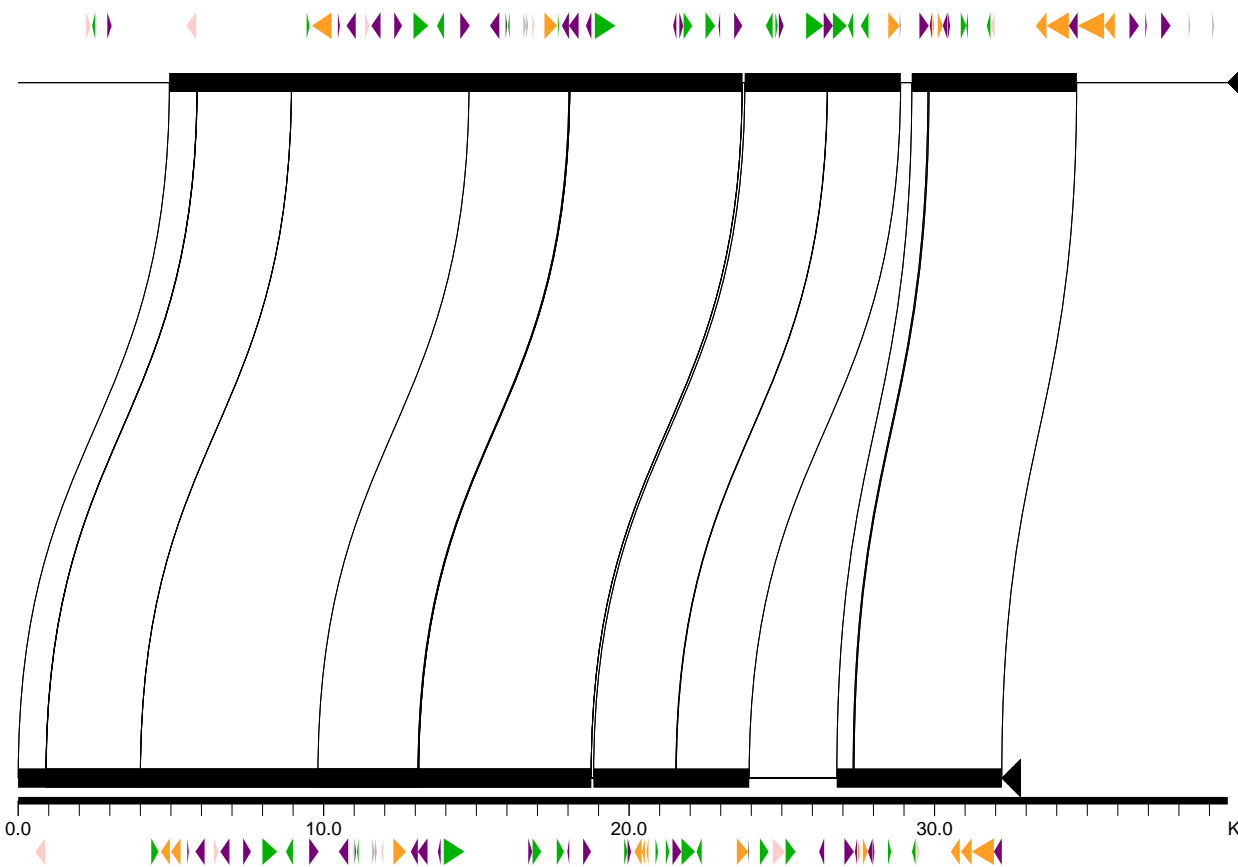

Clone: ABC10\_44485300\_J9 Accession: AC203607

ESP Prediction: S Validation: I,I Mechanism: NHEJ

Other Simple Repeat Low Complexity DNA LTR LINE SINE

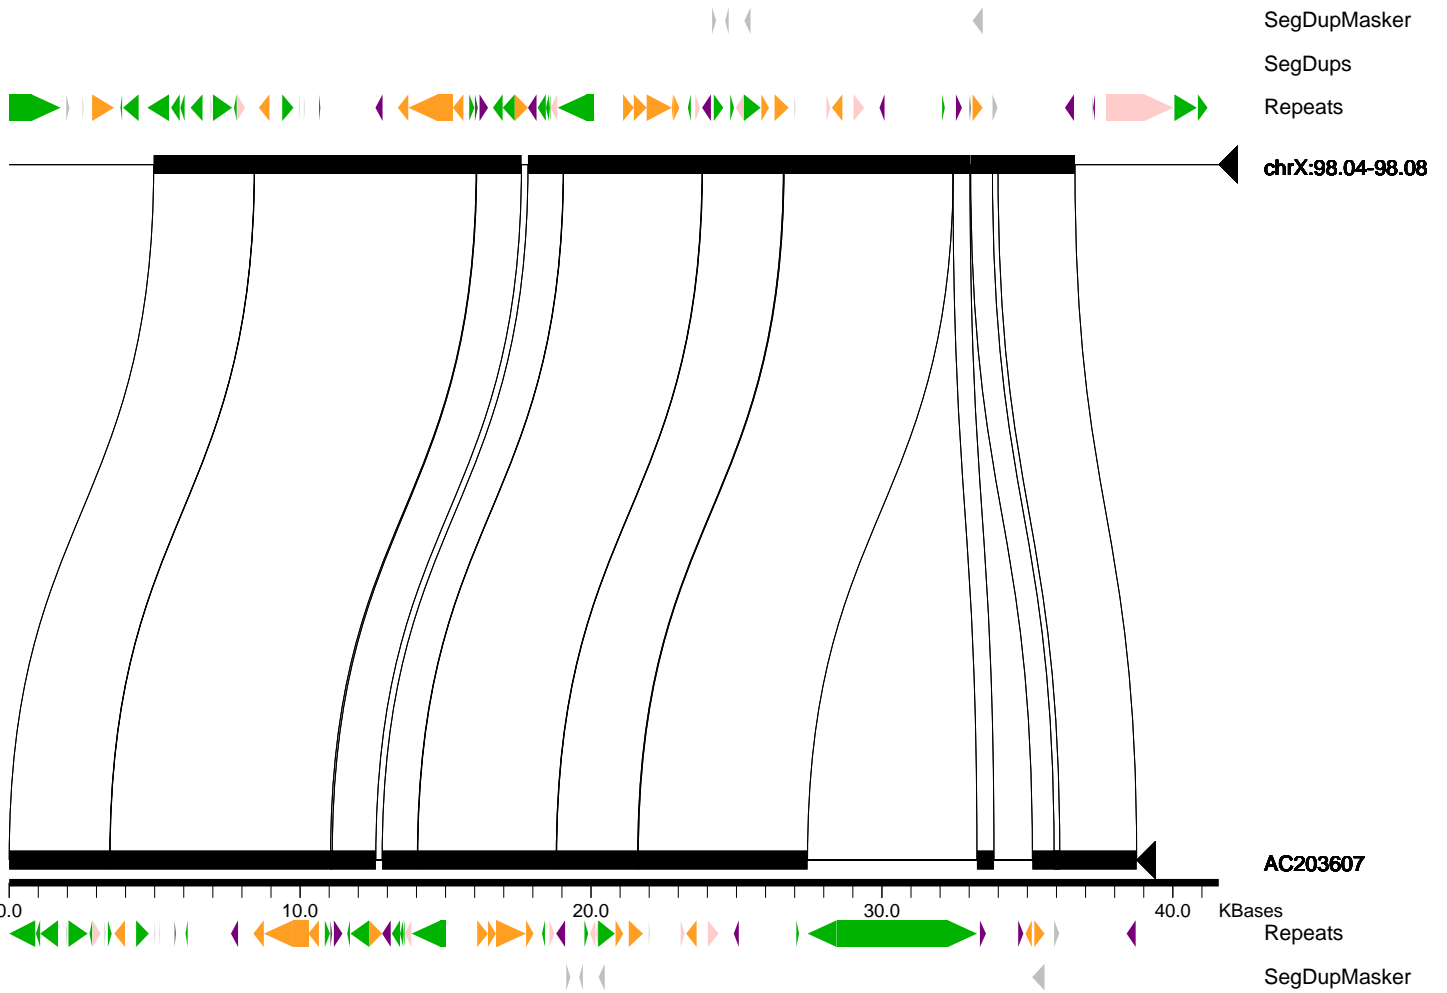

Clone: ABC10\_44486600\_L14 Accession: AC206478  
ESP Prediction: B Validation: D Mechanism: NHEJ (AS)

Other Simple Repeat Low Complexity DNA LTR LINE SINE

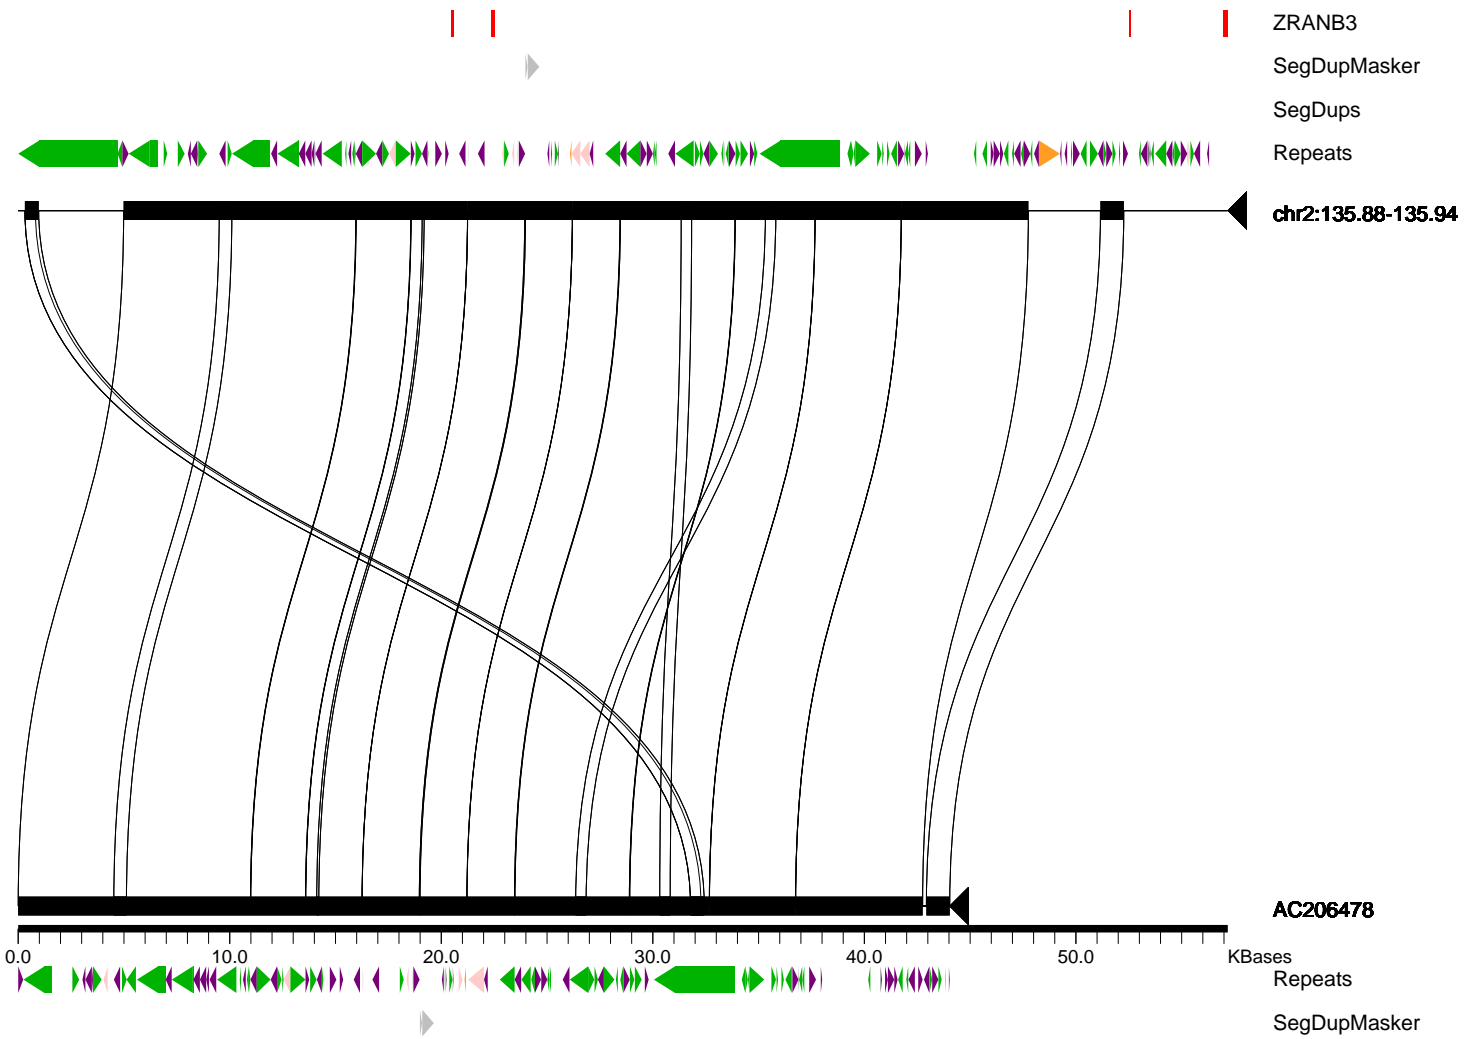

Clone: ABC10\_44495600\_J7 Accession: AC203639

ESP Prediction: S Validation: I Mechanism: NHEJ

Other Simple Repeat Low Complexity DNA LTR LINE SINE

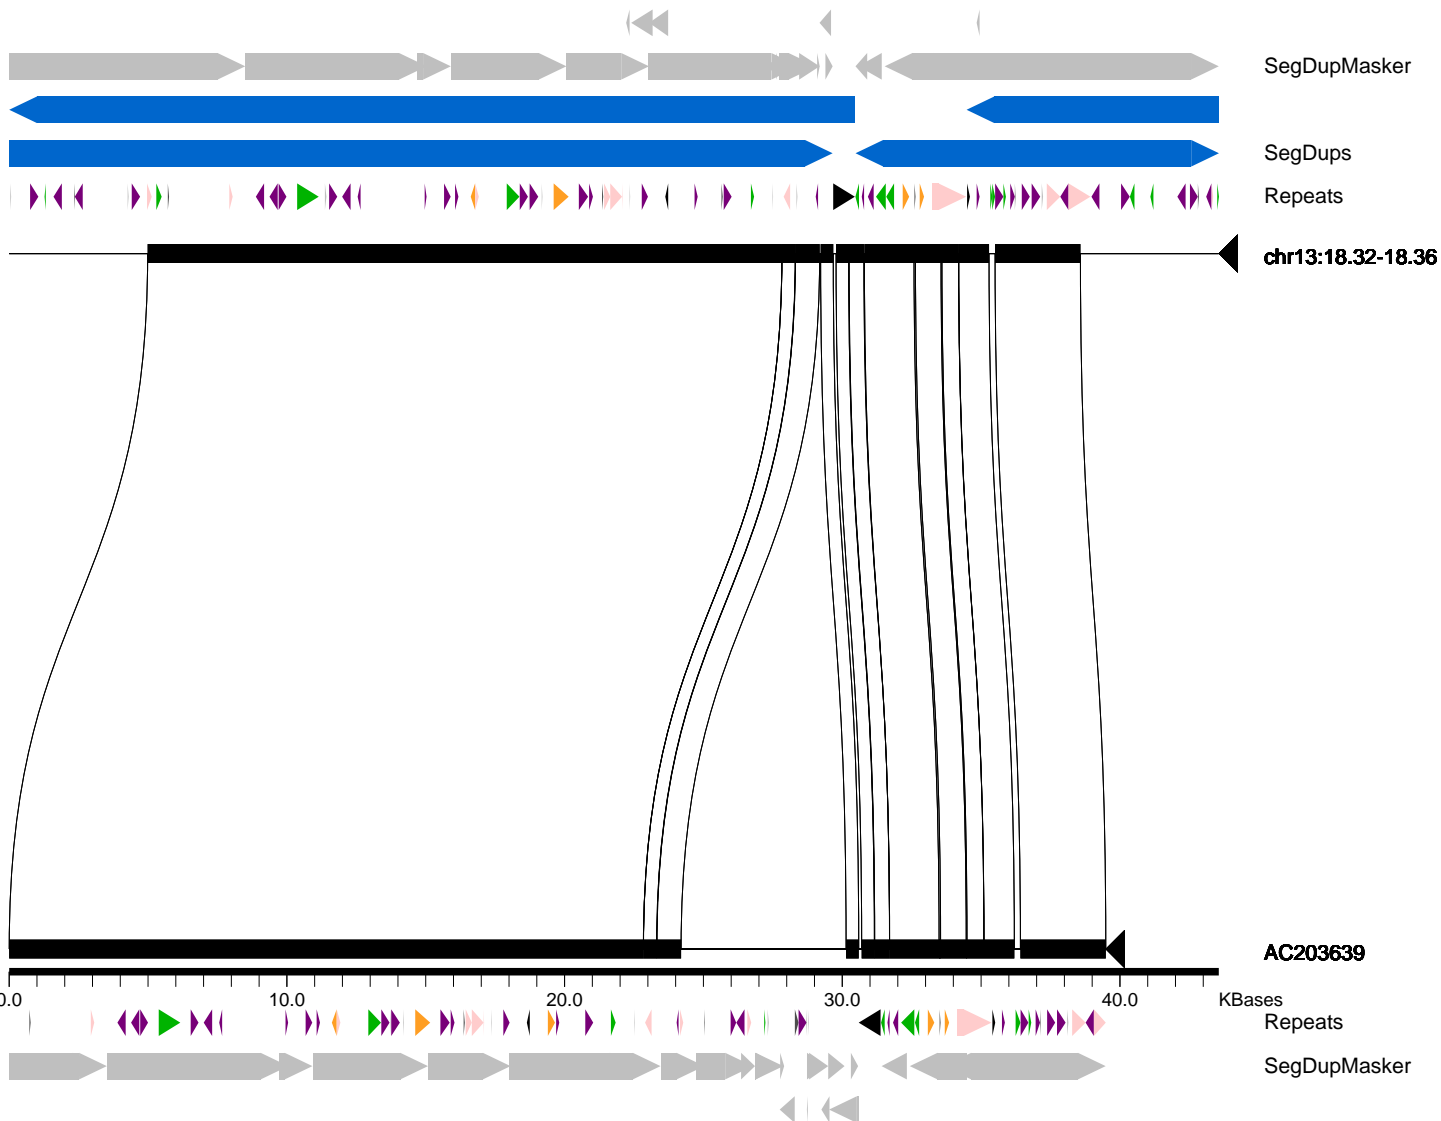

Clone: ABC10\_4451990\_M4 Accession: AC203588

ESP Prediction: B Validation: D Mechanism: NHEJ

Other Simple Repeat Low Complexity DNA LTR LINE SINE

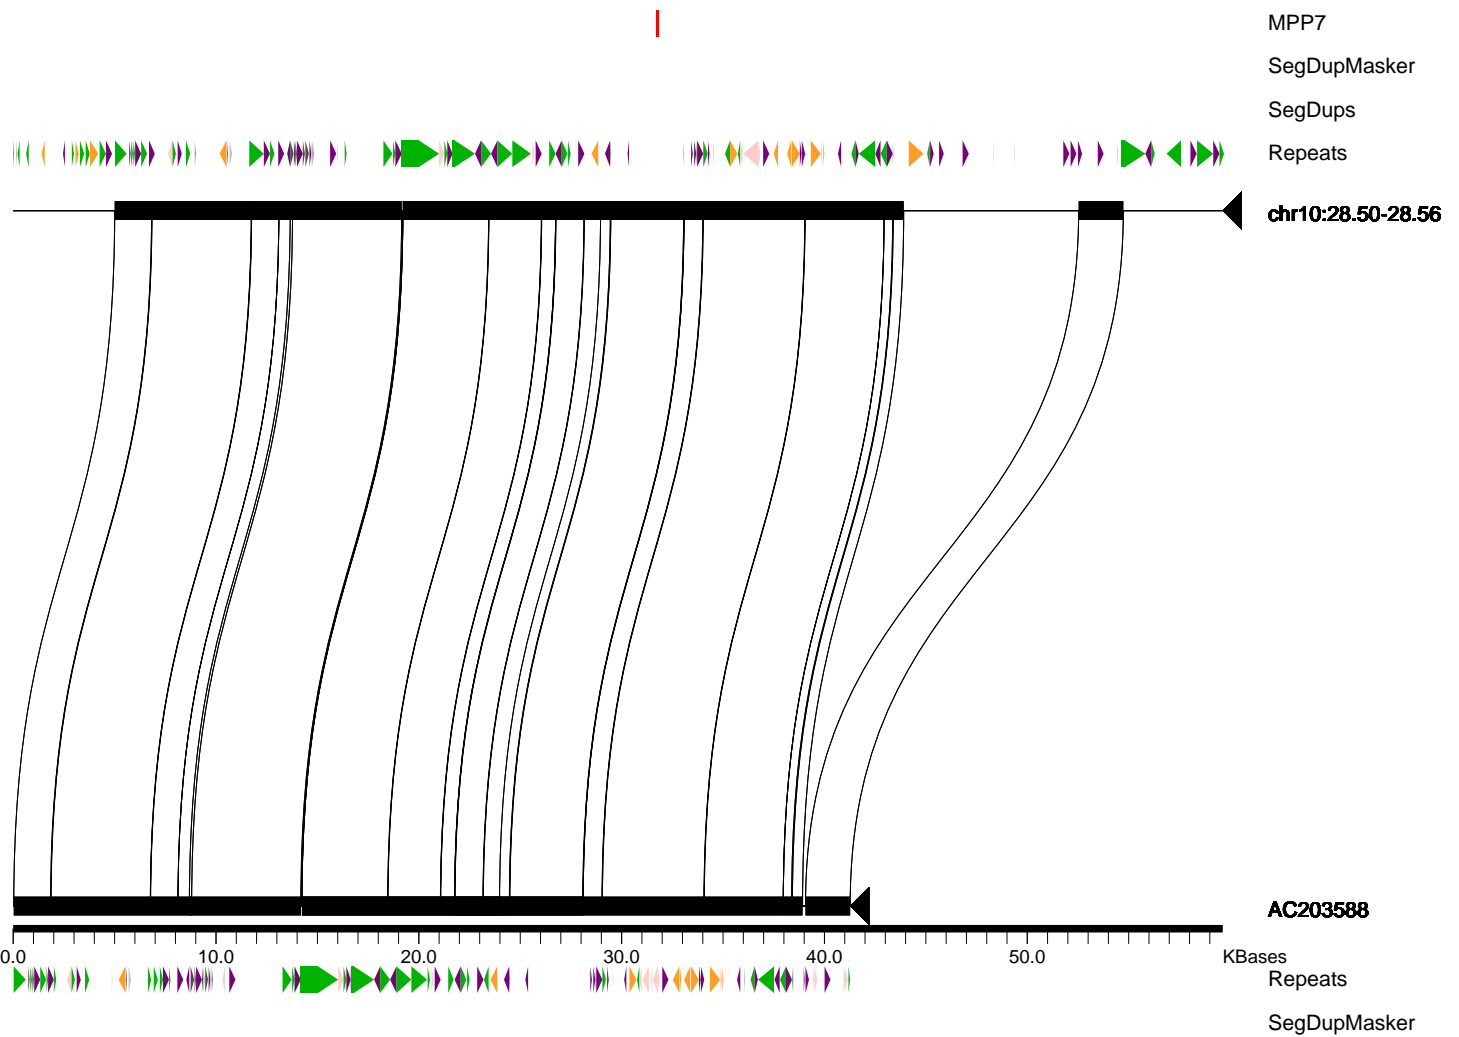

Clone: ABC10\_44521200\_I21 Accession: AC203606

ESP Prediction: S Validation: I Mechanism: NHEJ

Other Simple Repeat Low Complexity DNA LTR LINE SINE

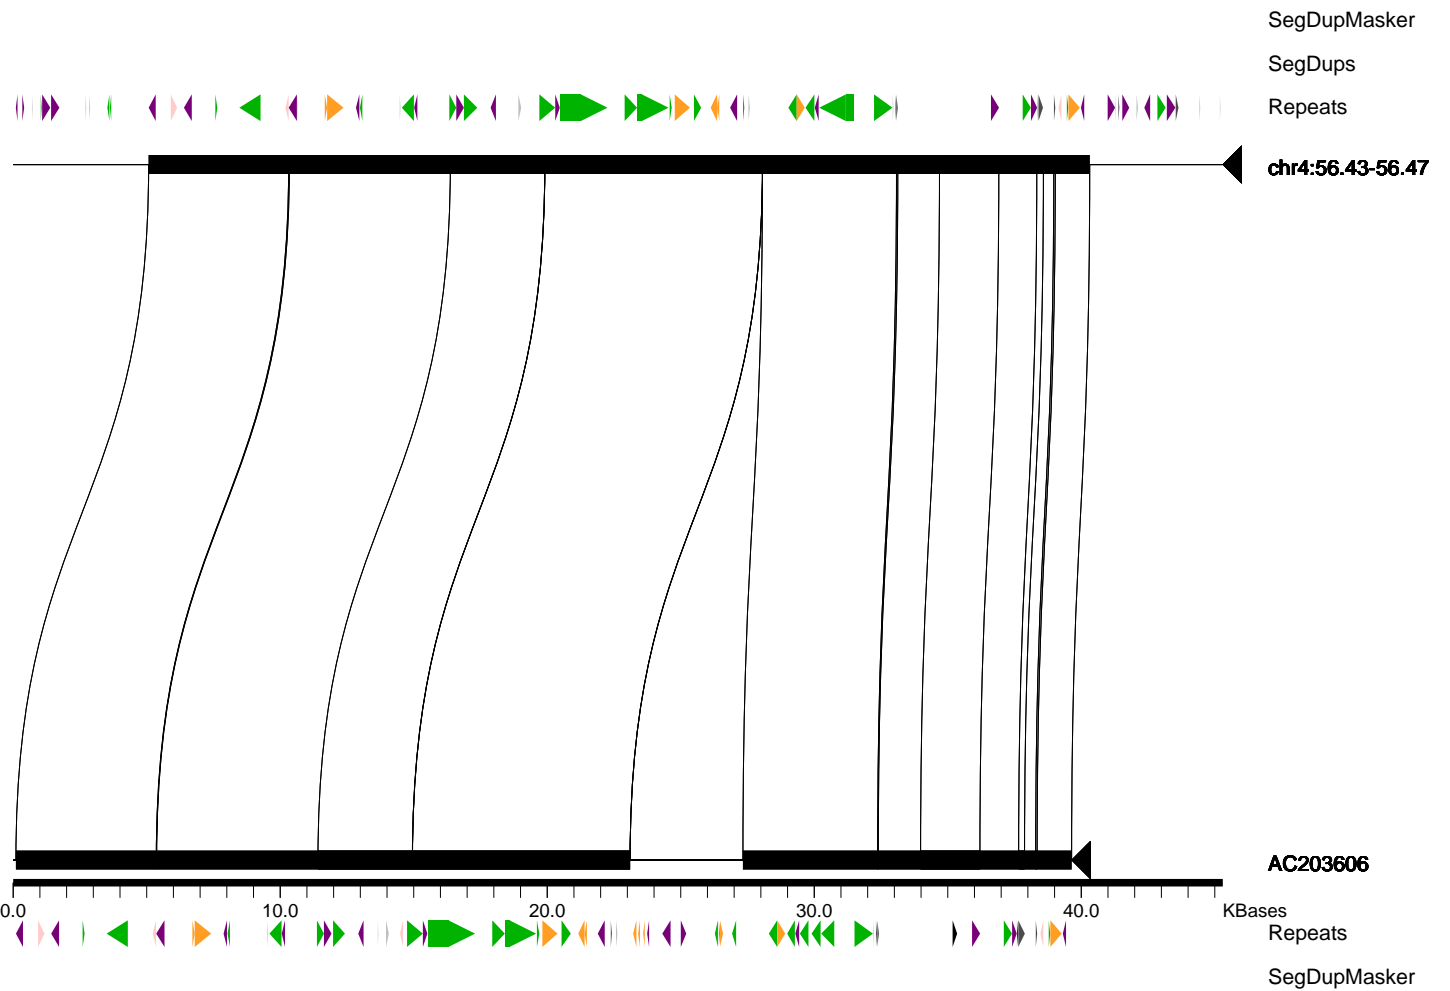

Clone: ABC10\_45547100\_O20 Accession: AC203644

ESP Prediction: S Validation: I Mechanism: NHEJ

Other Simple Repeat Low Complexity DNA LTR LINE SINE

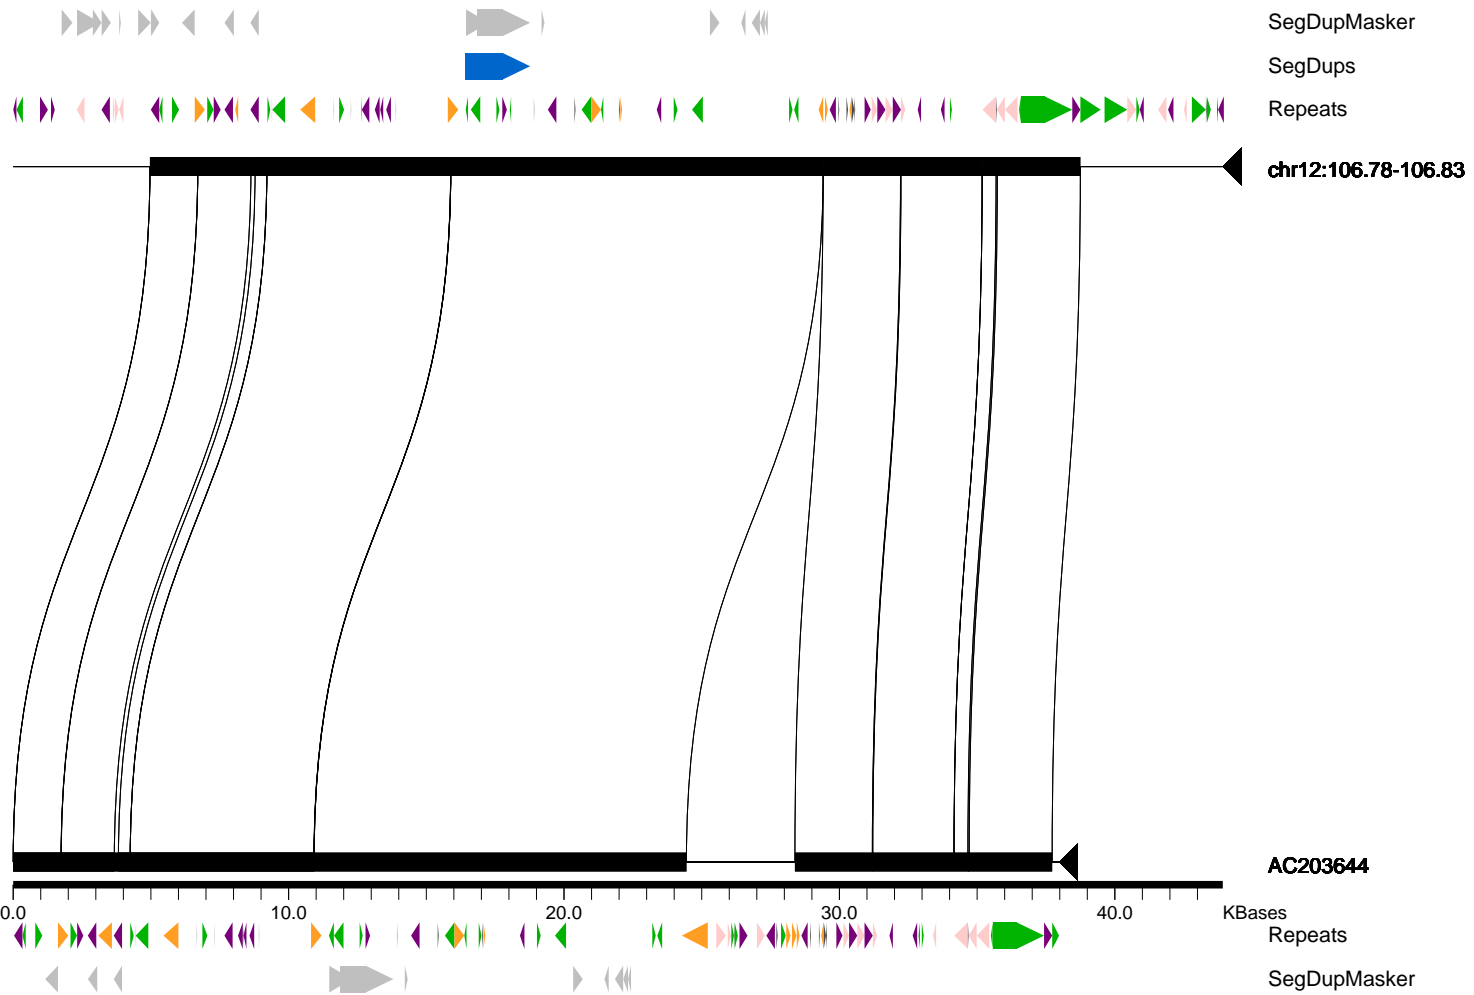

Clone: ABC10\_45548800\_C7 Accession: AC203647

ESP Prediction: B Validation: D Mechanism: NHEJ

Other Simple Repeat Low Complexity DNA LTR LINE SINE

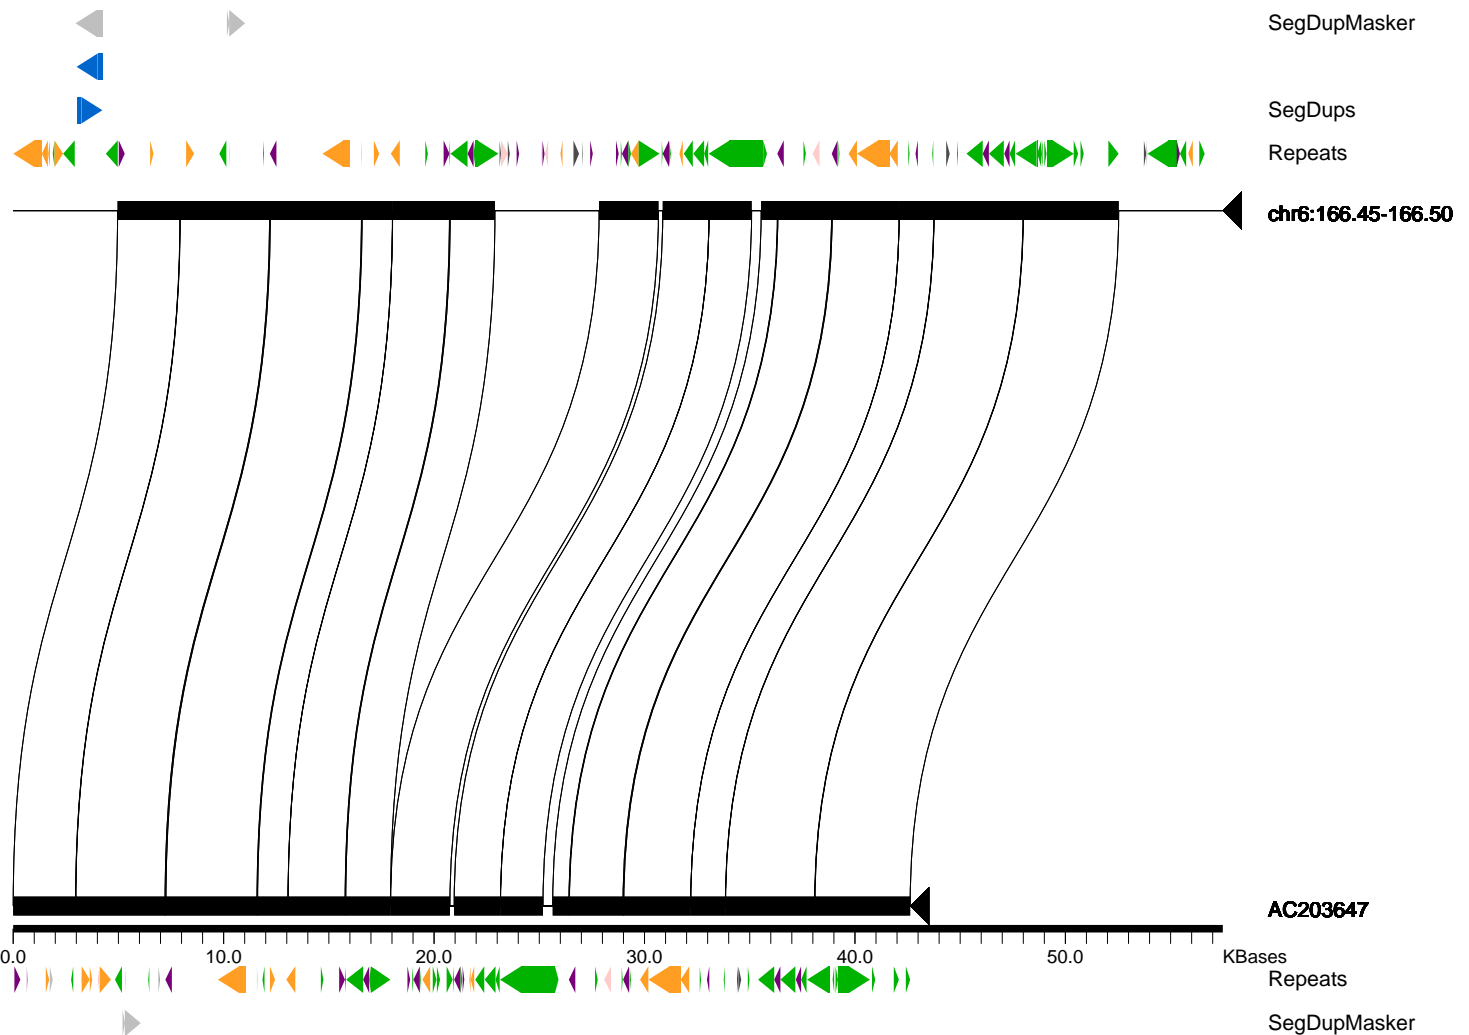



Clone: ABC10\_44375900\_O3 Accession: AC203617

ESP Prediction: S Validation: I Mechanism: NHEJ

Other Simple Repeat Low Complexity DNA LTR LINE SINE

SegDupMasker

SegDups

Repeats

chr11:91.68-91.72

AC203617

Repeats

SegDupMasker

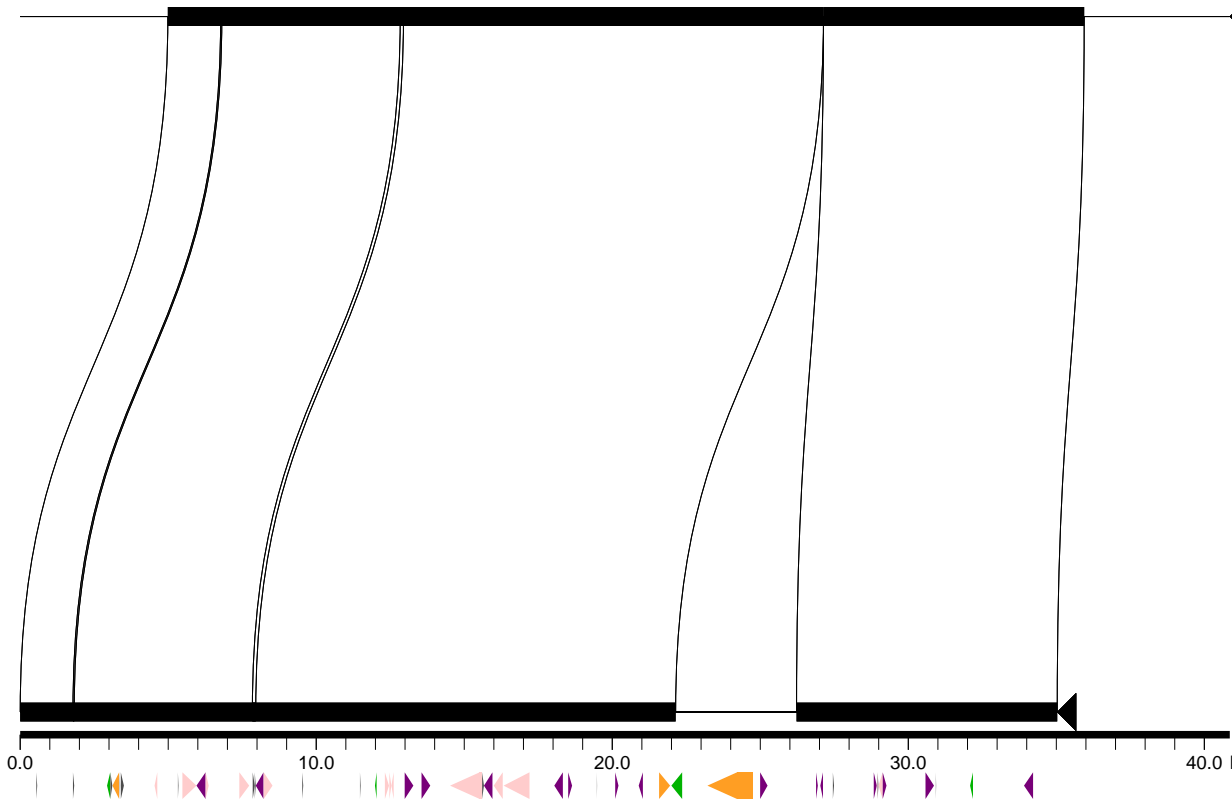

Clone: ABC10\_44545300\_D8 Accession: AC203603

ESP Prediction: B Validation: D Mechanism: NHEJ

Other Simple Repeat Low Complexity DNA LTR LINE SINE

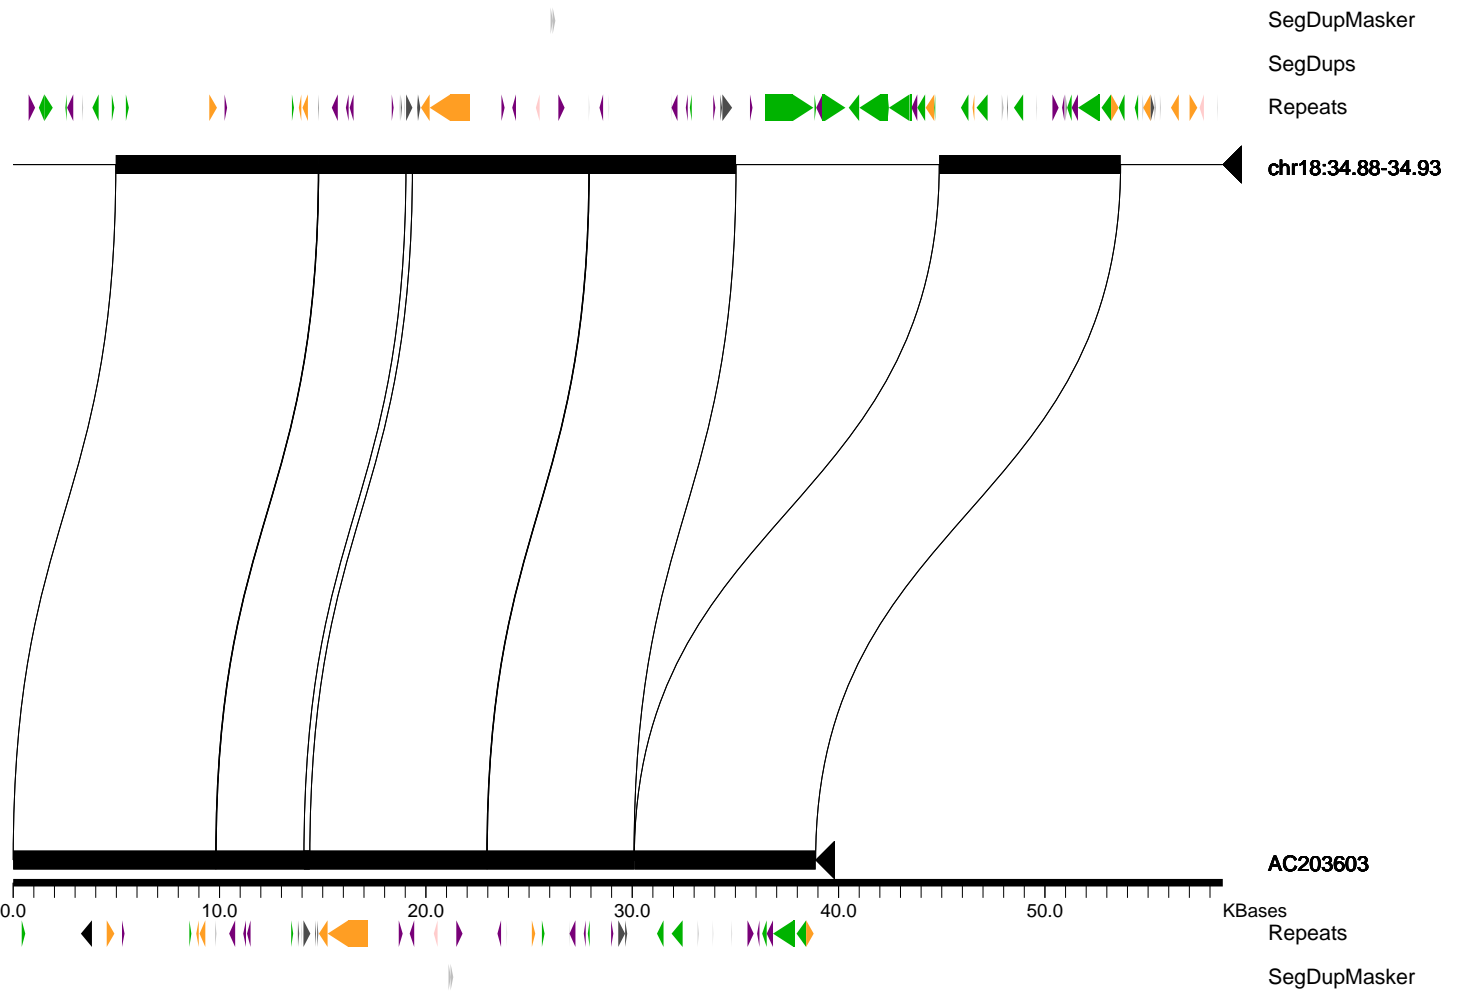

Clone: ABC10\_44562100\_L6 Accession: AC207058  
ESP Prediction: B Validation: D Mechanism: NHEJ (AS)

Other Simple Repeat Low Complexity DNA LTR LINE SINE

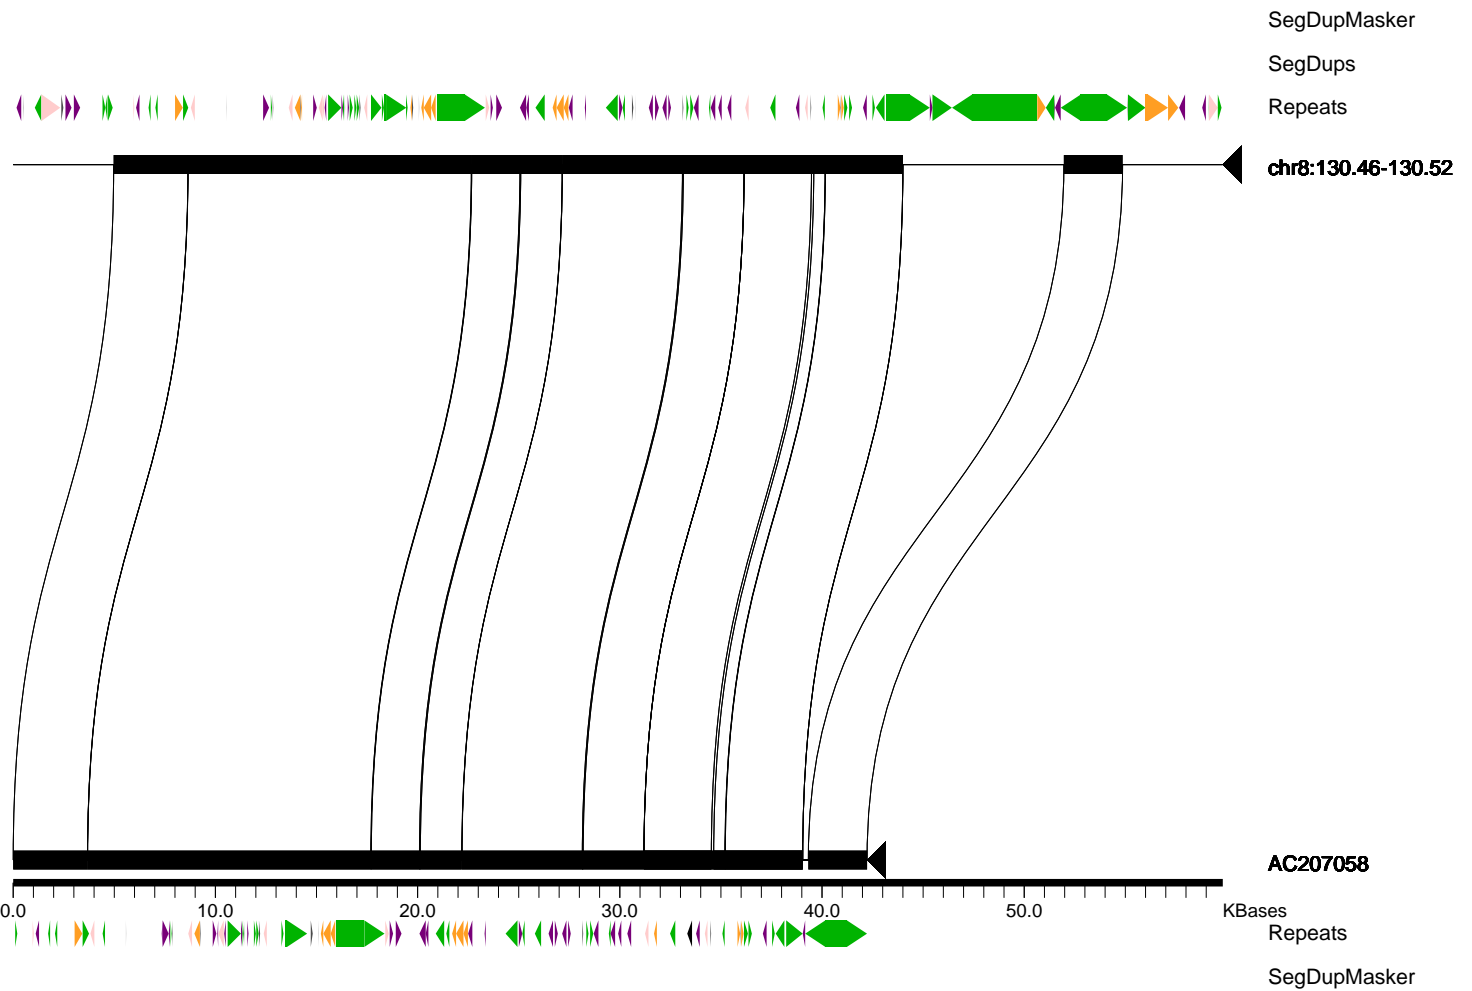

Clone: ABC10\_44586400\_K20 Accession: AC203598

ESP Prediction: B Validation: D,complex Mechanism: NHEJ (AS)

Other Simple Repeat Low Complexity DNA LTR LINE SINE

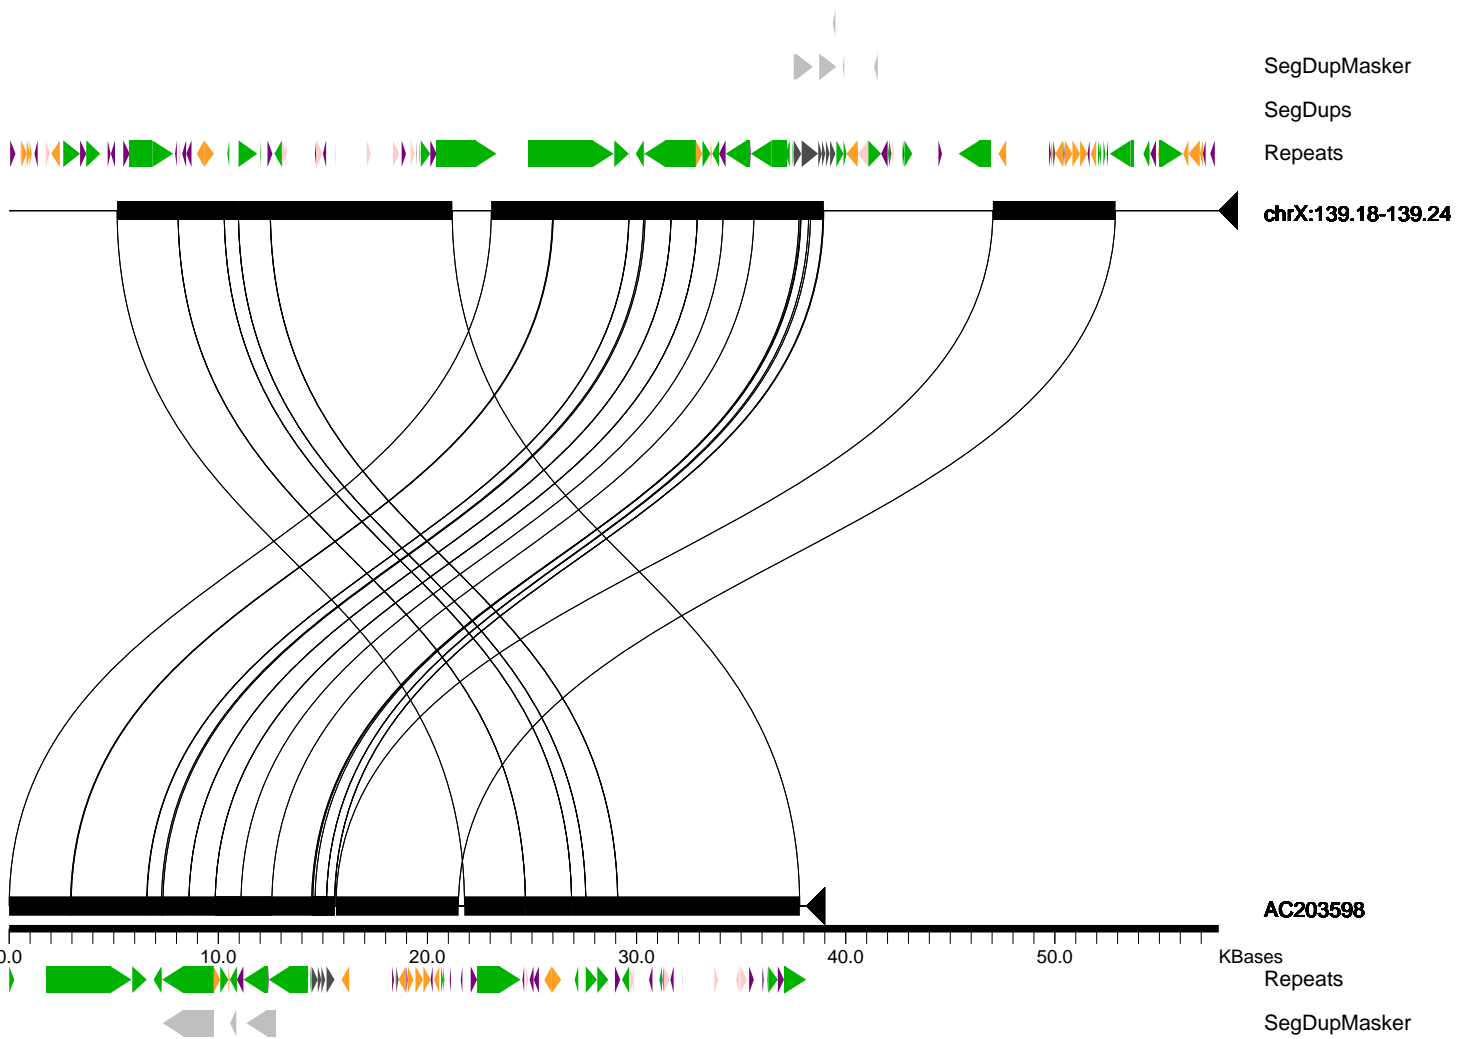

Clone: ABC7\_496522\_H6 Accession: AC213505

ESP Prediction: B Validation: D Mechanism: NHEJ

Other Simple Repeat Low Complexity DNA LTR LINE SINE

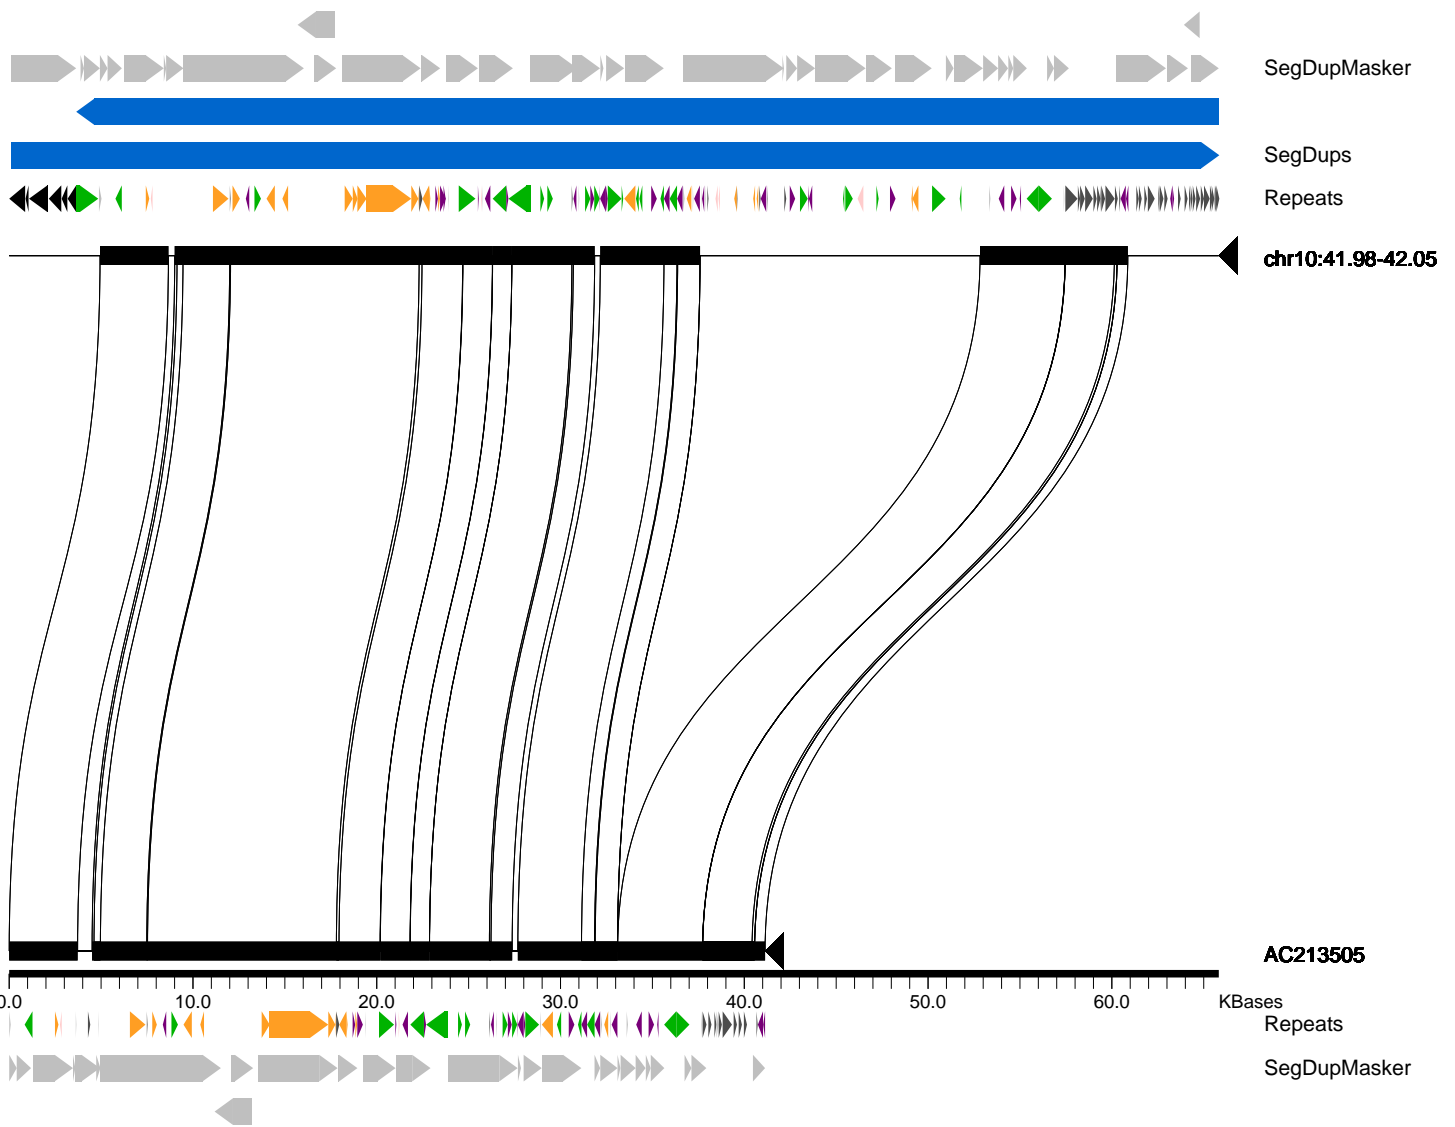

Clone: ABC7\_42060800\_O9 Accession: AC213226  
ESP Prediction: B Validation: D Mechanism: NHEJ

Other Simple Repeat Low Complexity DNA LTR LINE SINE

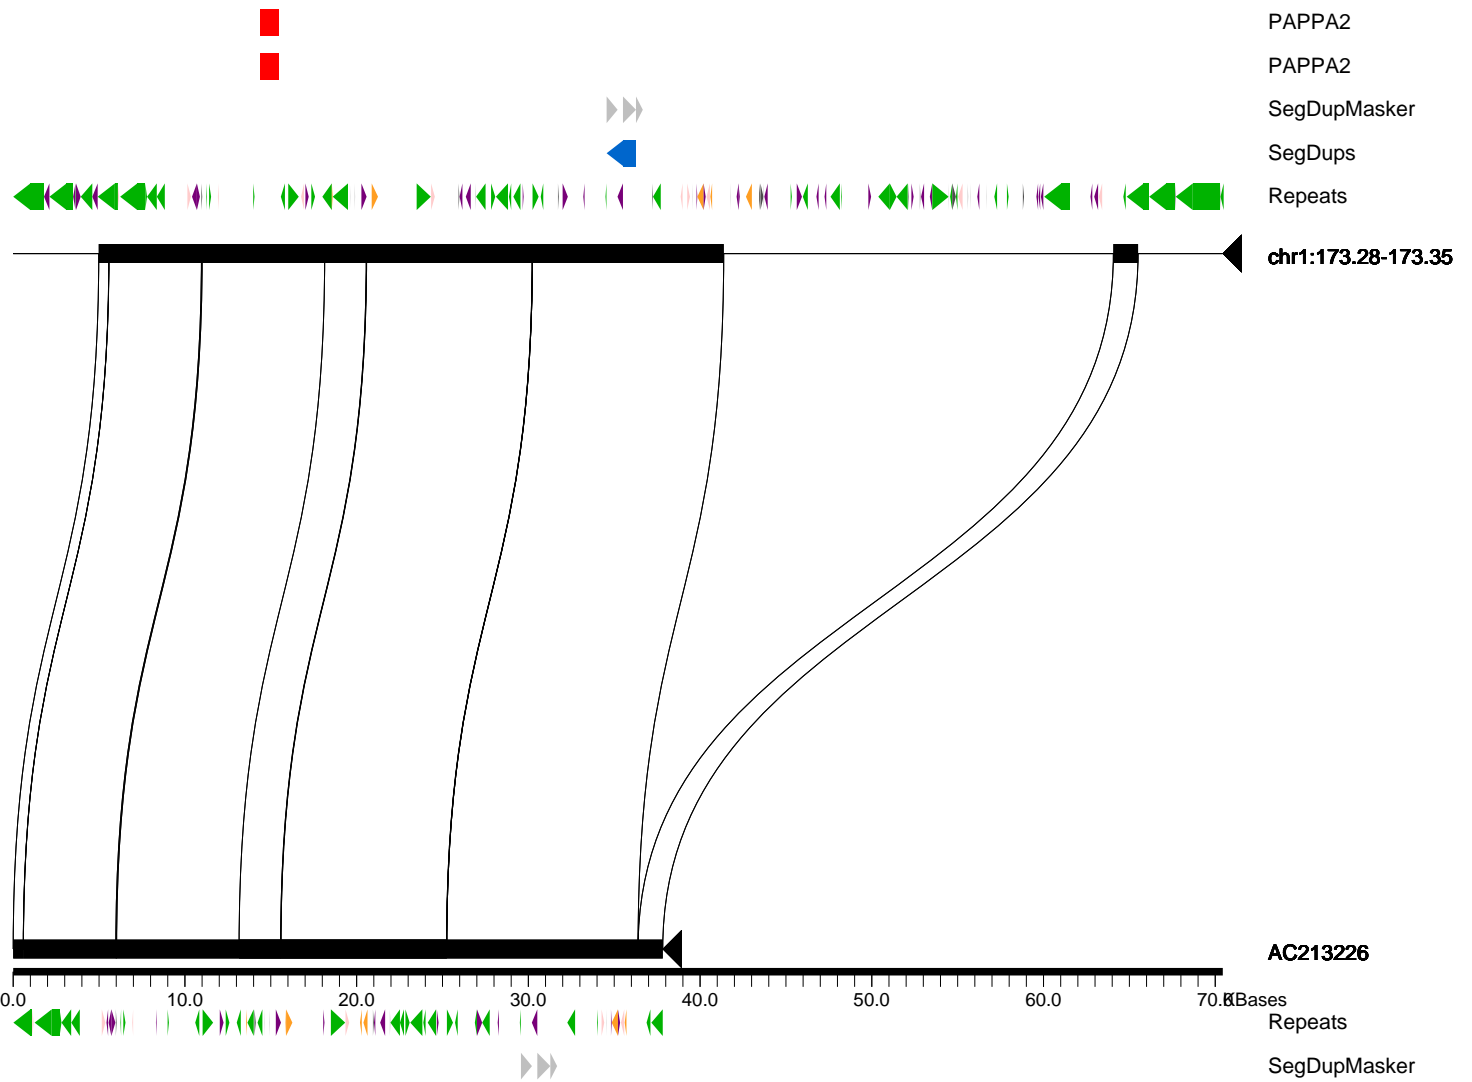

Clone: ABC7\_42405300\_H16 Accession: AC213224

ESP Prediction: B Validation: D Mechanism: NHEJ

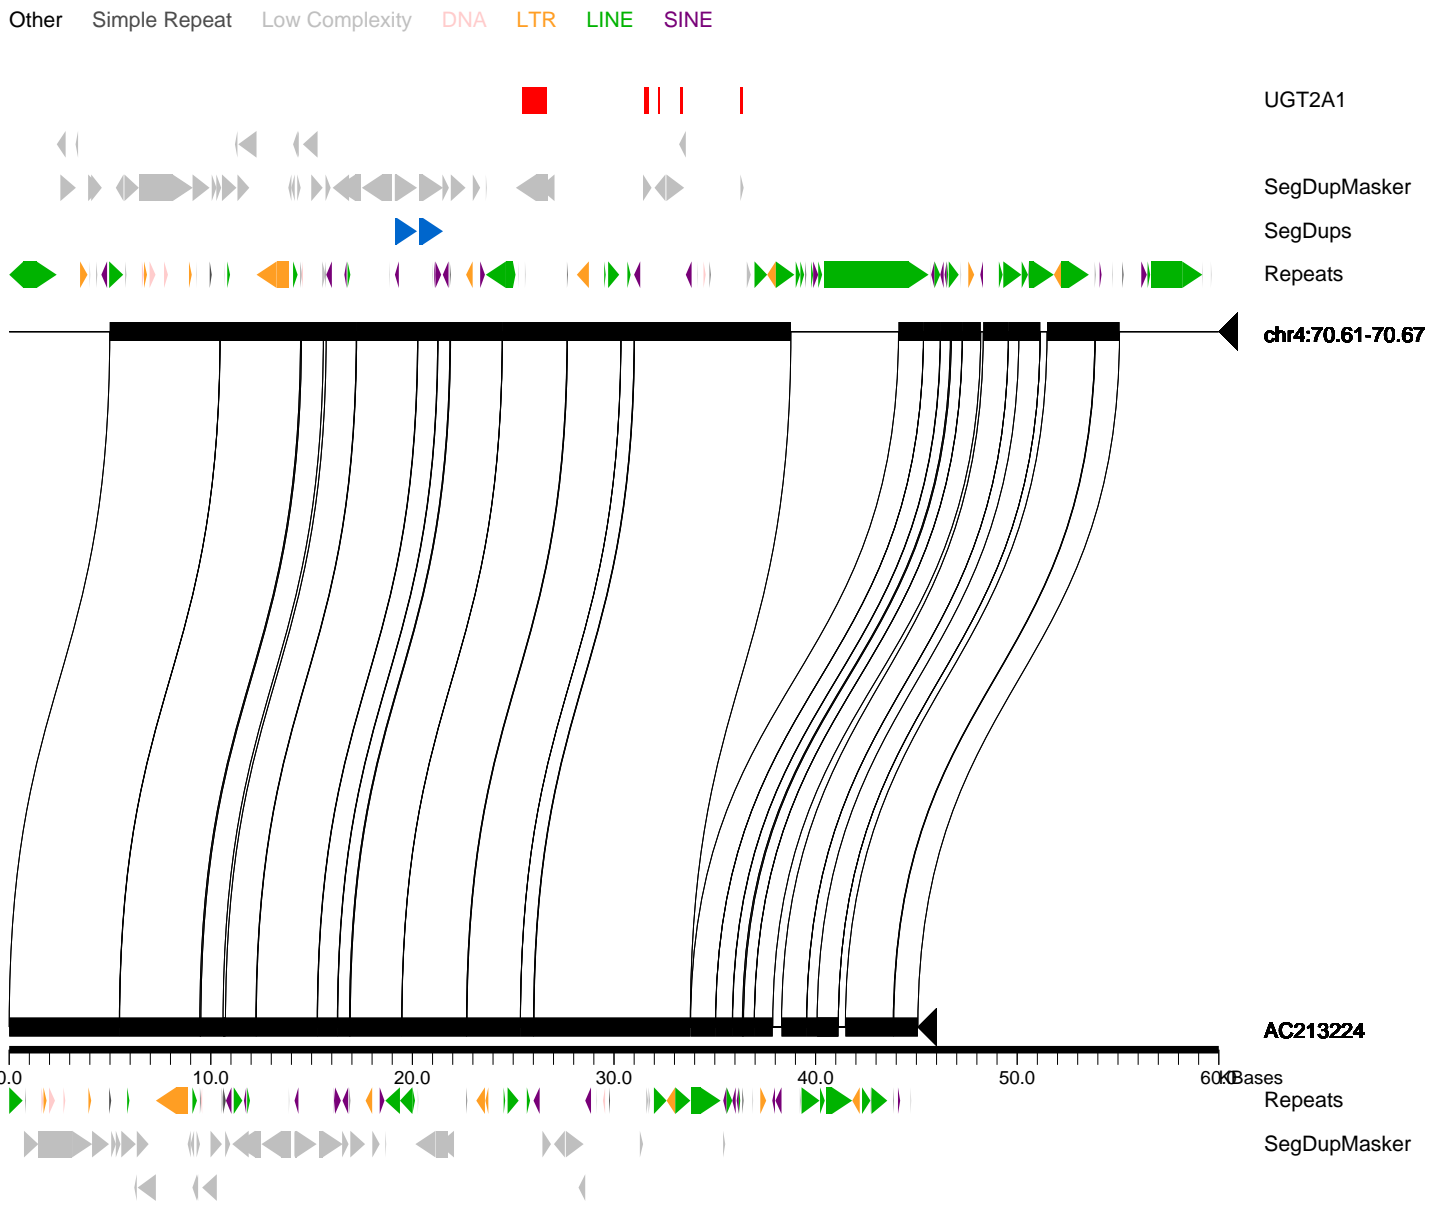

Clone: ABC8\_669522\_D1 Accession: AC213272

ESP Prediction: B Validation: D Mechanism: NHEJ

Other Simple Repeat Low Complexity DNA LTR LINE SINE

SegDupMasker

SegDups

Repeats

chr8:63.36-63.43

AC213272

KBases

Repeats

SegDupMasker

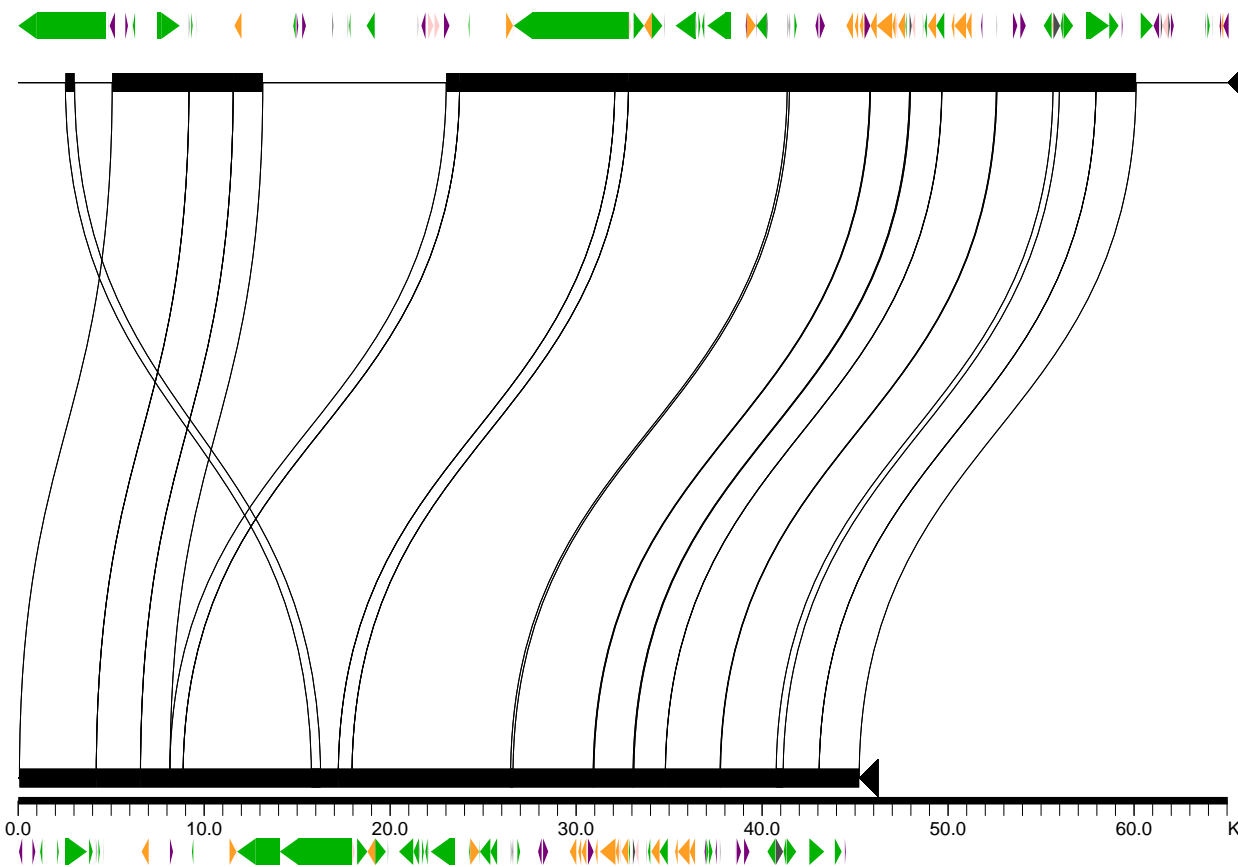



Clone: ABC8\_684522\_K19 Accession: AC213263

ESP Prediction: B Validation: D Mechanism: NHEJ

Other Simple Repeat Low Complexity DNA LTR LINE SINE

SegDupMasker

SegDups

Repeats

chr4:173.33-173.39

AC213263

KBases

Repeats

SegDupMasker

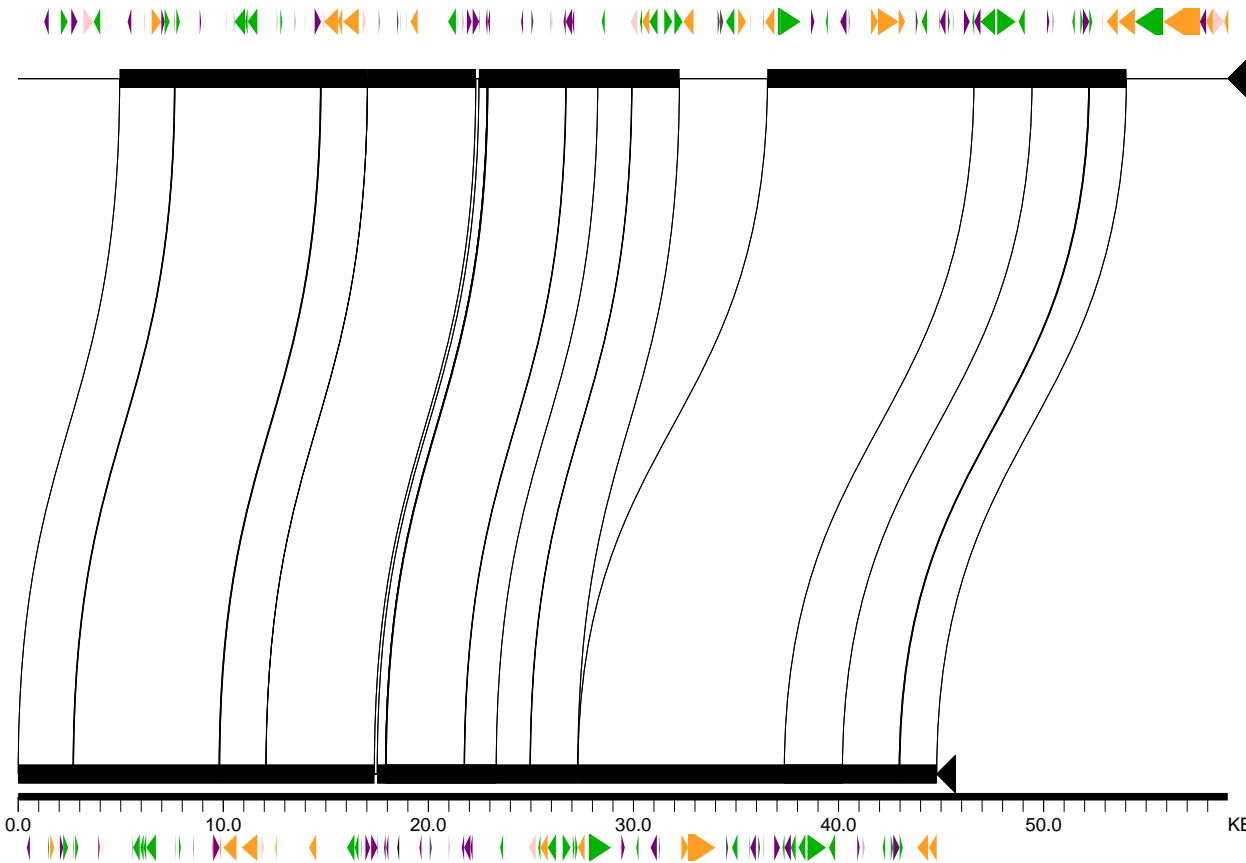

Clone: ABC8\_730940\_N1 Accession: AC213239

ESP Prediction: B Validation: D Mechanism: NHEJ (AS)

Other Simple Repeat Low Complexity DNA LTR LINE SINE

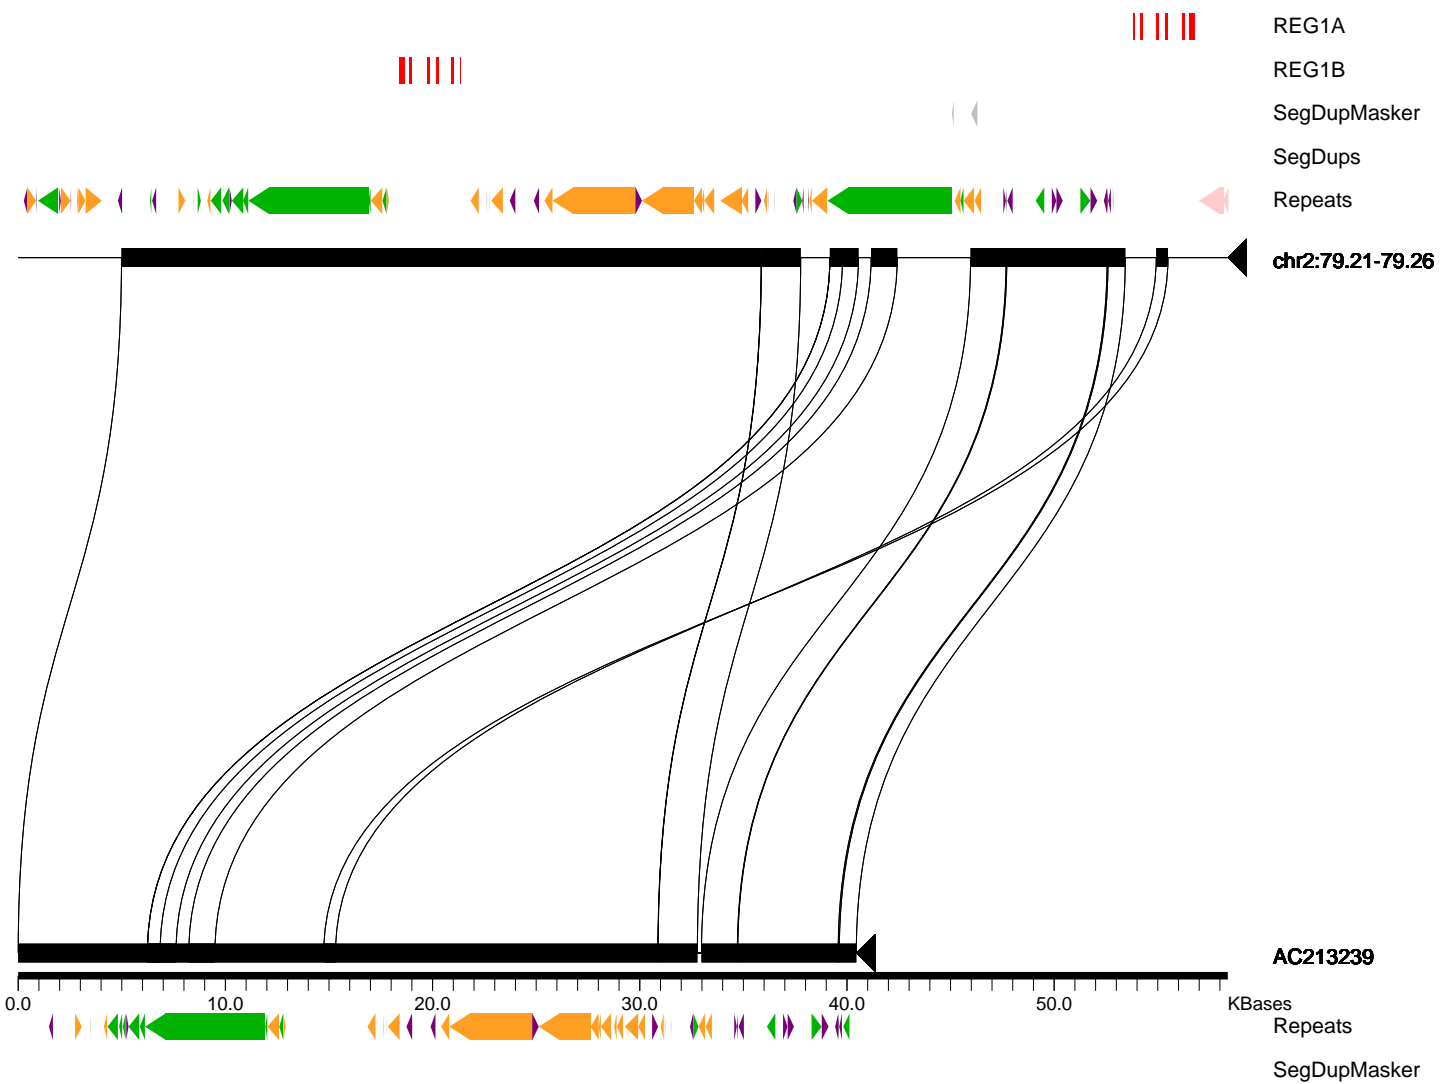

Clone: ABC8\_738440\_L11 Accession: AC213291

ESP Prediction: B Validation: D Mechanism: NHEJ

Other Simple Repeat Low Complexity DNA LTR LINE SINE

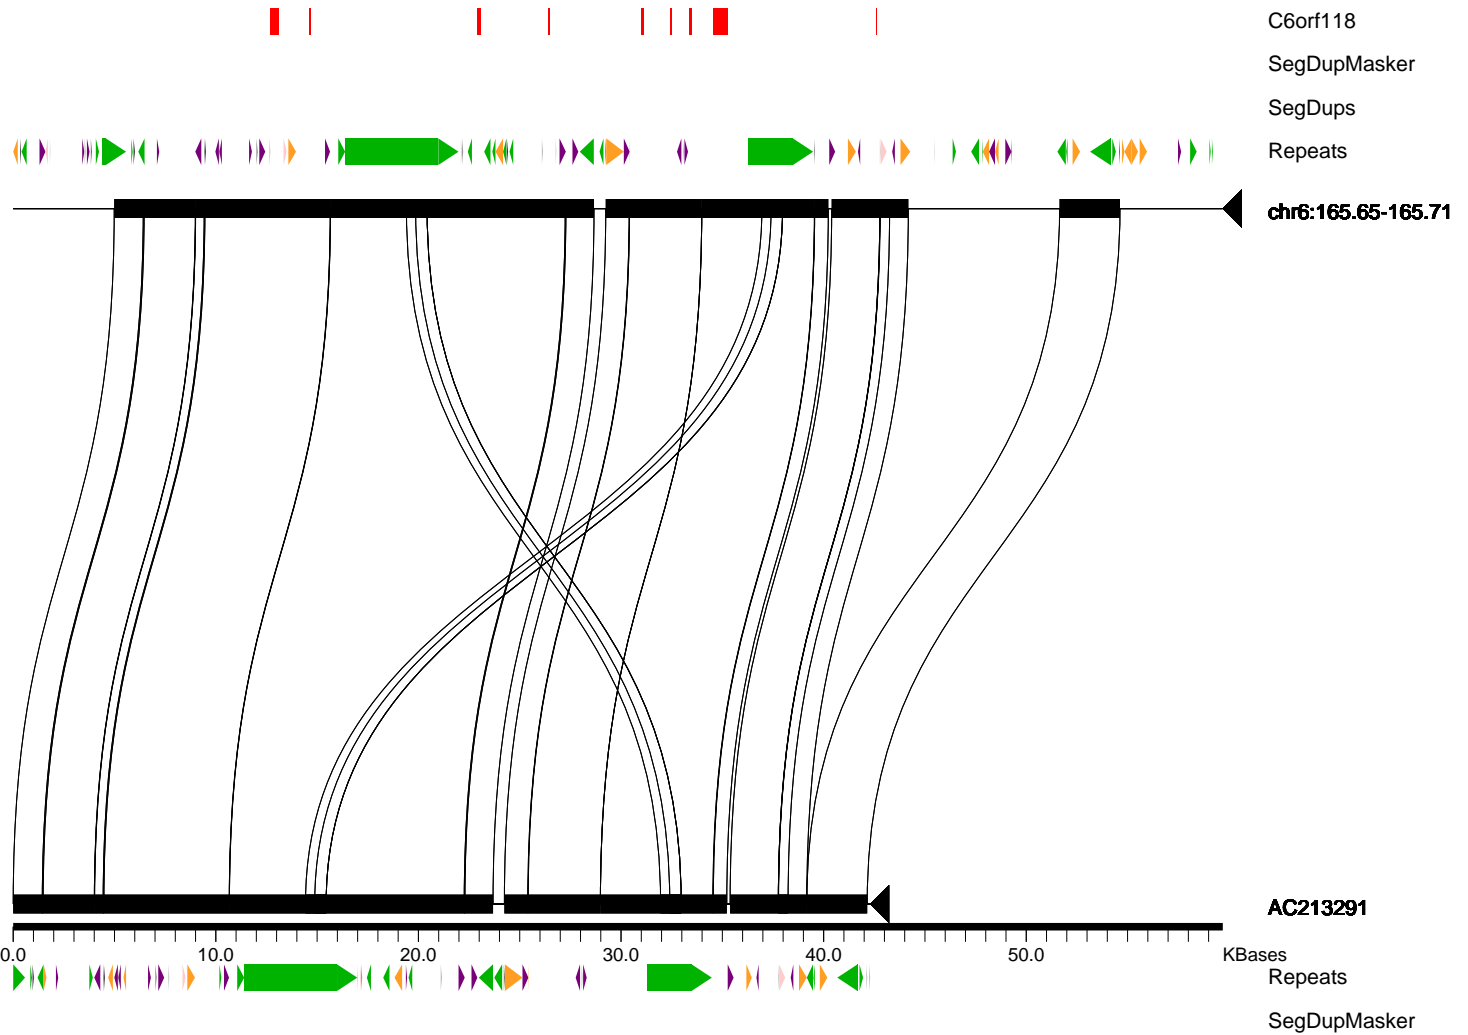

Clone: ABC8\_40865700\_D13 Accession: AC213273  
ESP Prediction: B Validation: D Mechanism: NHEJ (AS)

Other Simple Repeat Low Complexity DNA LTR LINE SINE

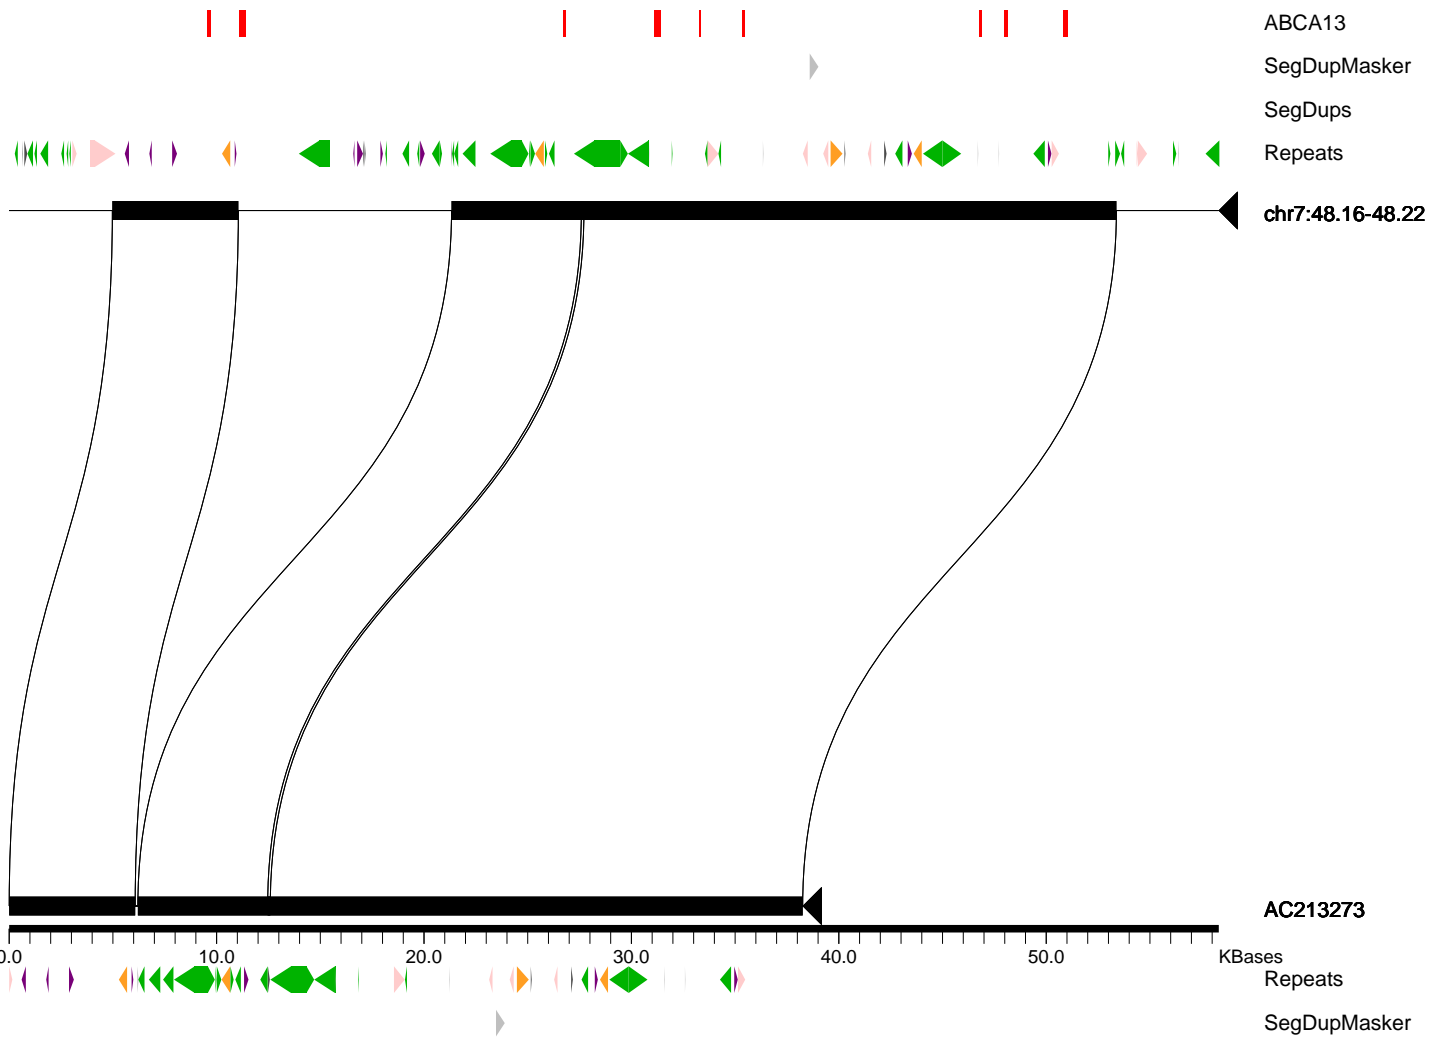

Clone: ABC8\_40907600\_H16 Accession: AC213259

ESP Prediction: B Validation: D Mechanism: NHEJ

Other Simple Repeat Low Complexity DNA LTR LINE SINE

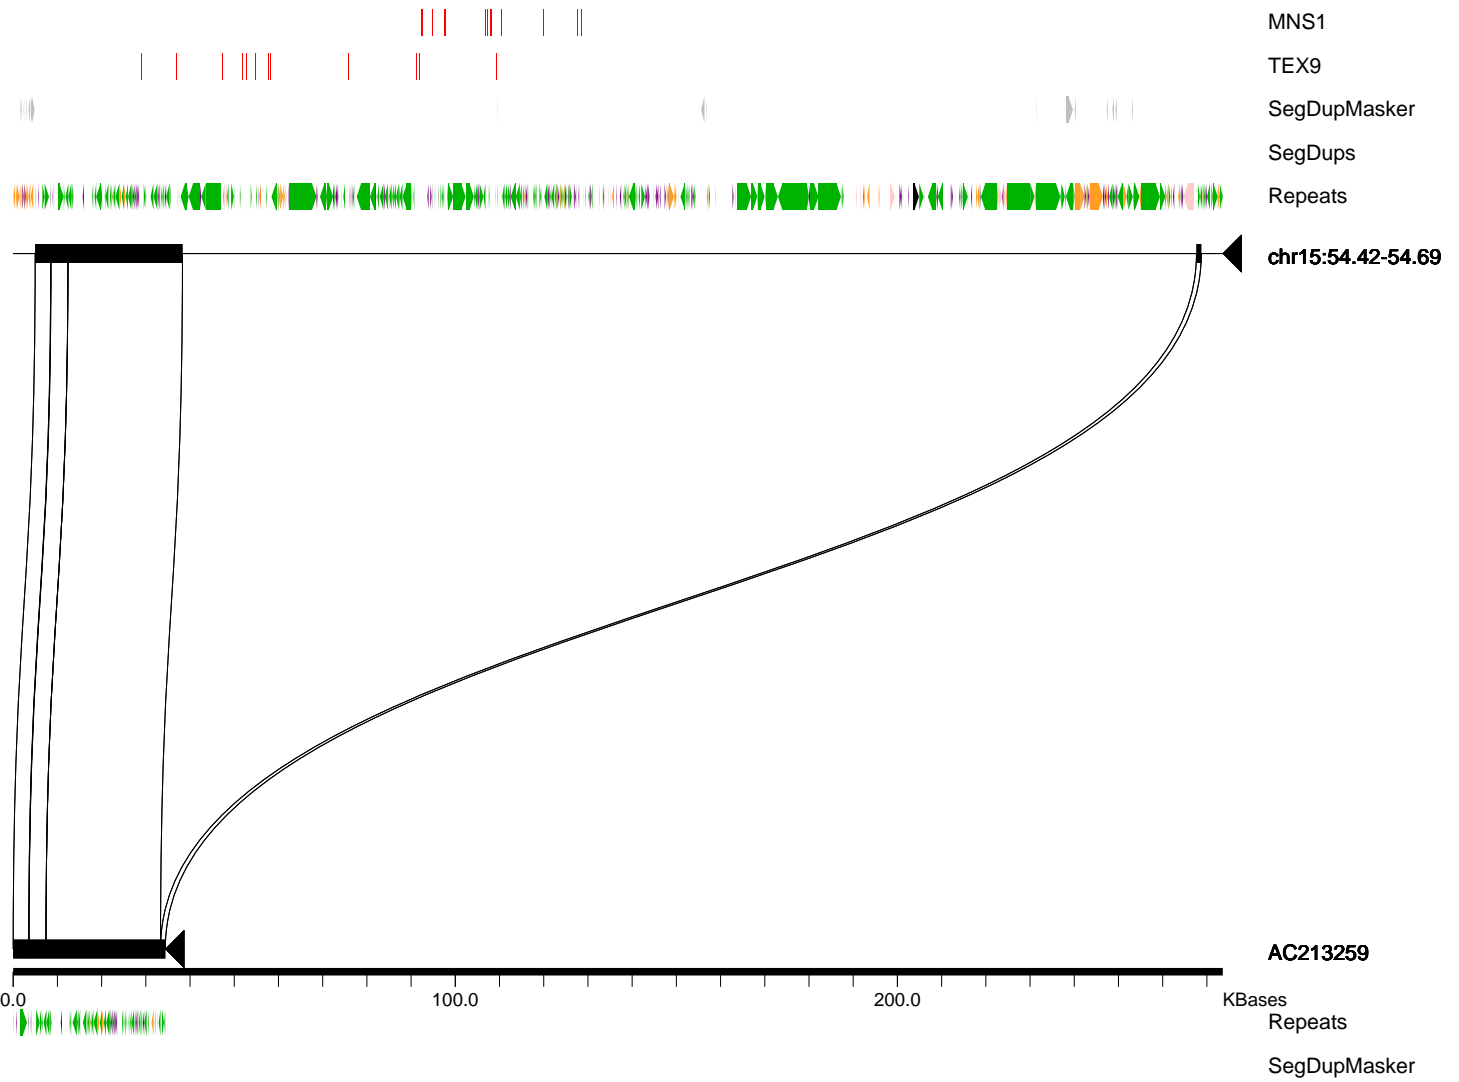

Clone: WIBR2-3321H01 Accession: AC158338

ESP Prediction: B Validation: D Mechanism: NHEJ

Other Simple Repeat Low Complexity DNA LTR LINE SINE

SegDupMasker

SegDups

Repeats

chr3:28.12-28.19

AC158338

Repeats

SegDupMasker

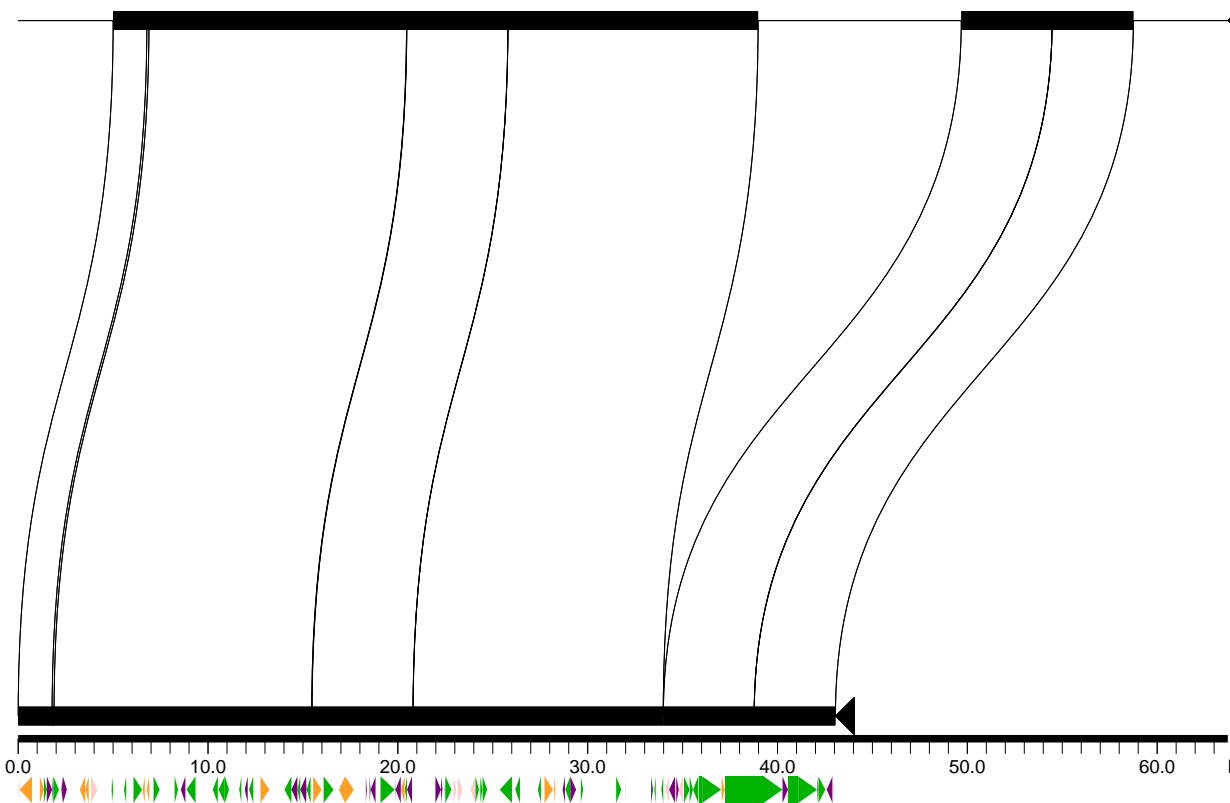

Clone: WIBR2-3351G01 Accession: AC193102

ESP Prediction: B Validation: D Mechanism: NHEJ (AS)

Other Simple Repeat Low Complexity DNA LTR LINE SINE

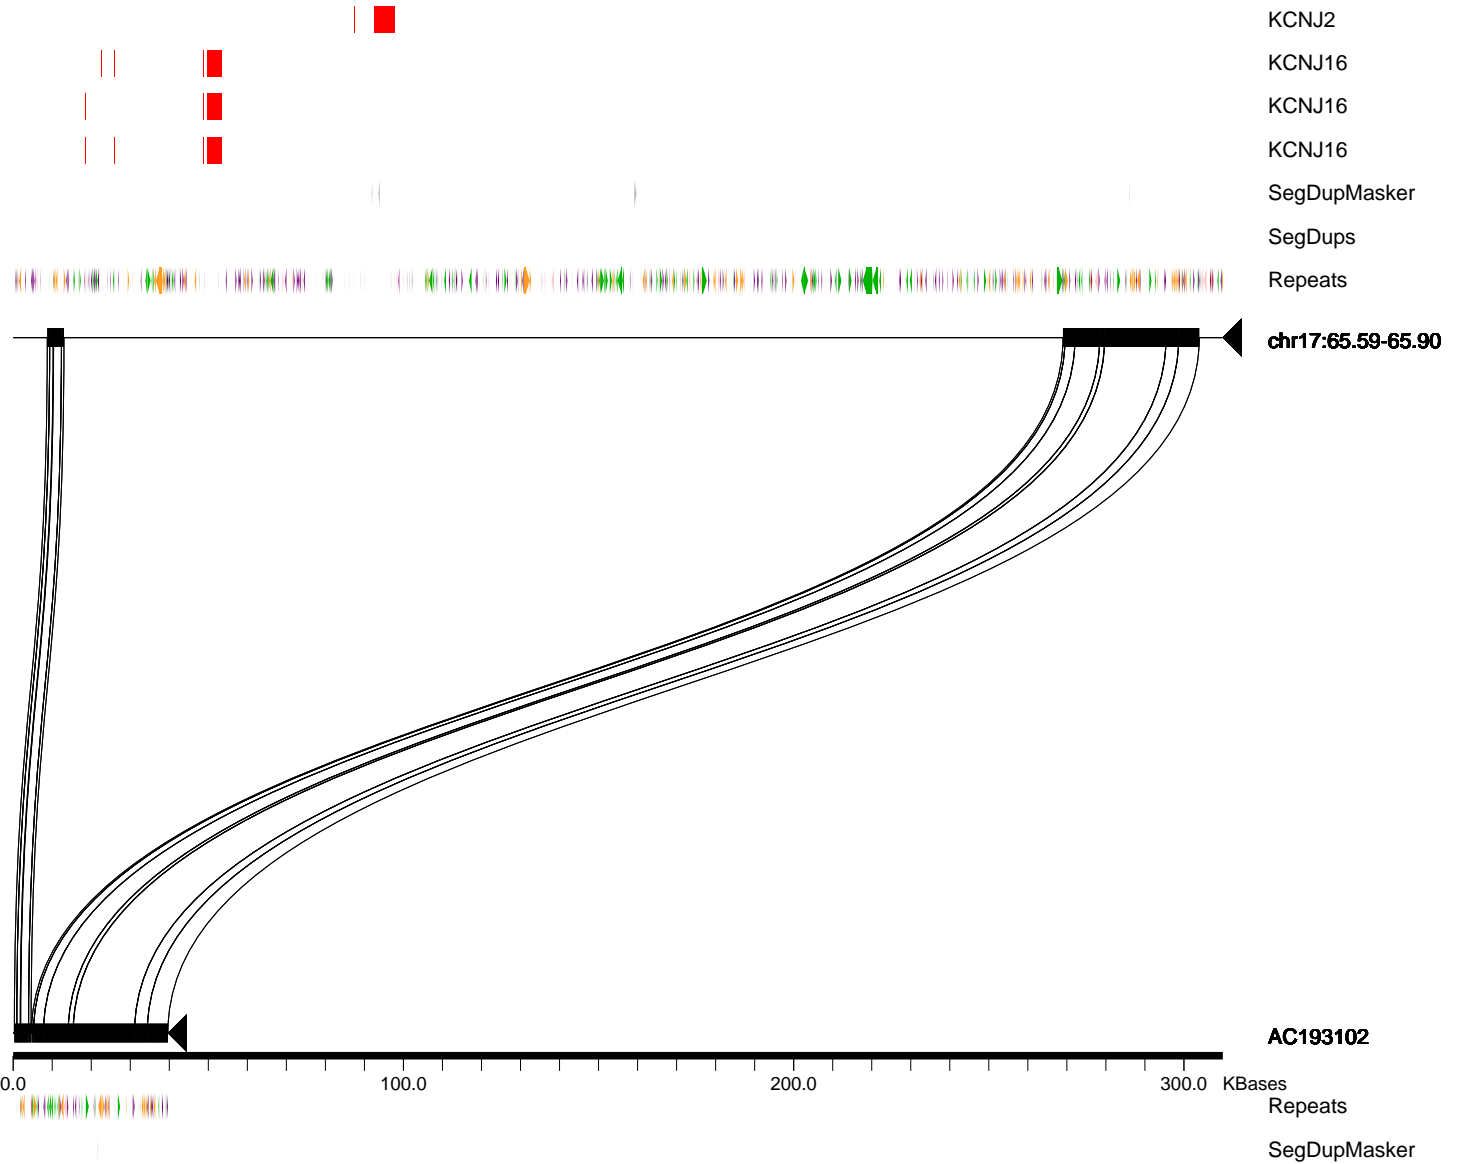

Clone: WIBR2-3427J12 Accession: AC196573

ESP Prediction: B Validation: D Mechanism: NHEJ

Other Simple Repeat Low Complexity DNA LTR LINE SINE

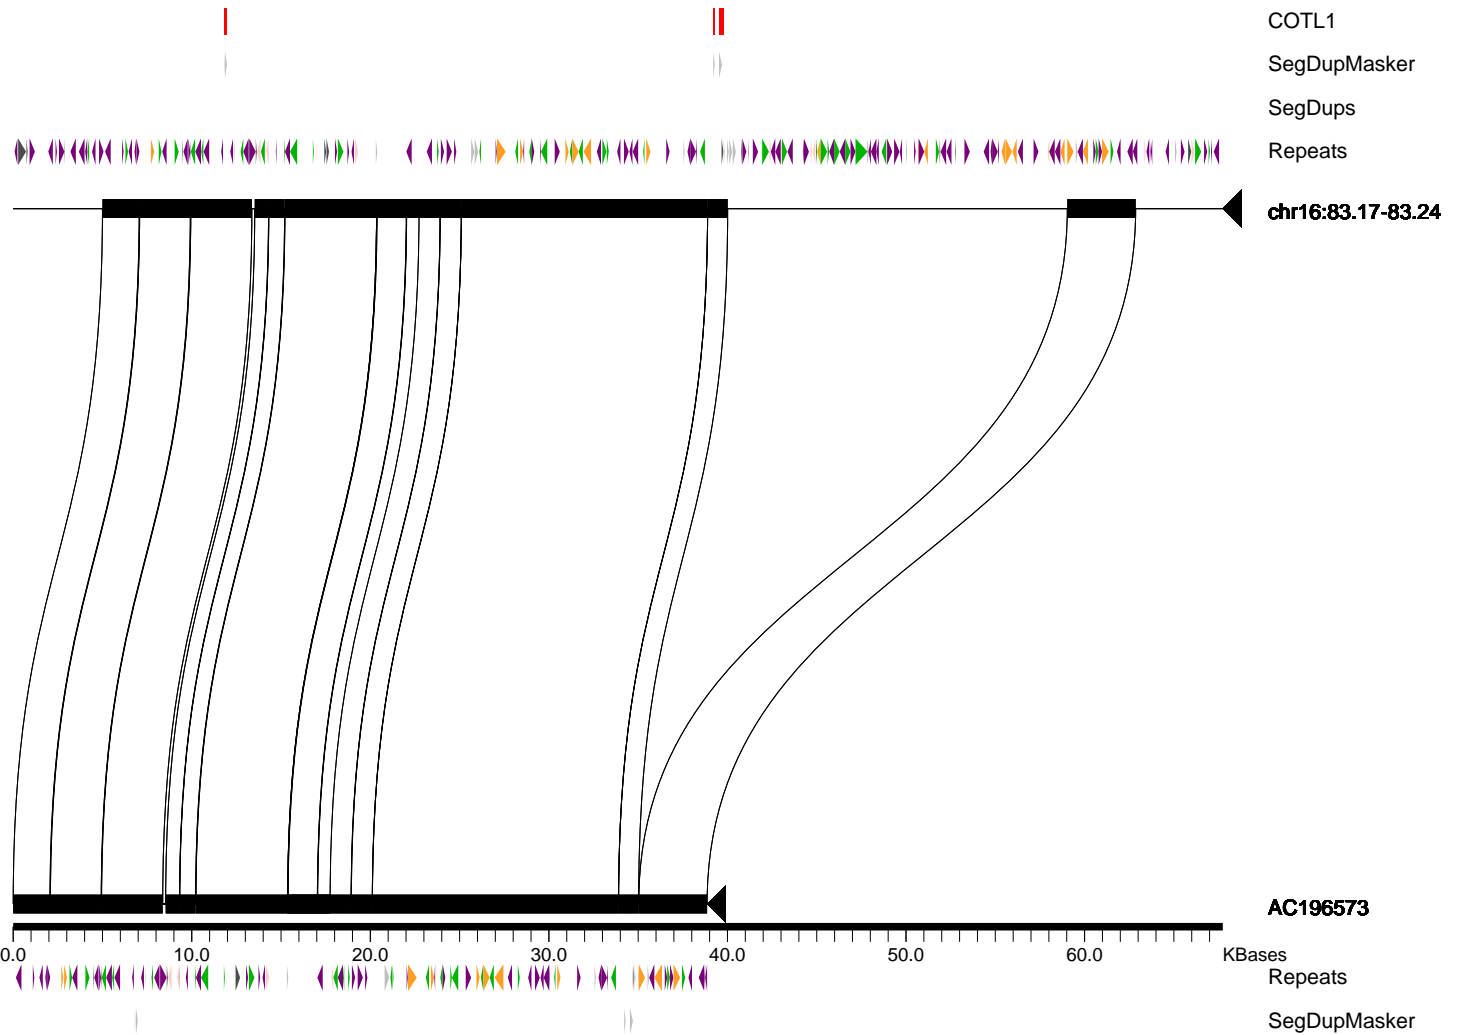



Clone: WIBR2-3180A21 Accession: AC193163

ESP Prediction: B Validation: D Mechanism: NHEJ

Other Simple Repeat Low Complexity DNA LTR LINE SINE

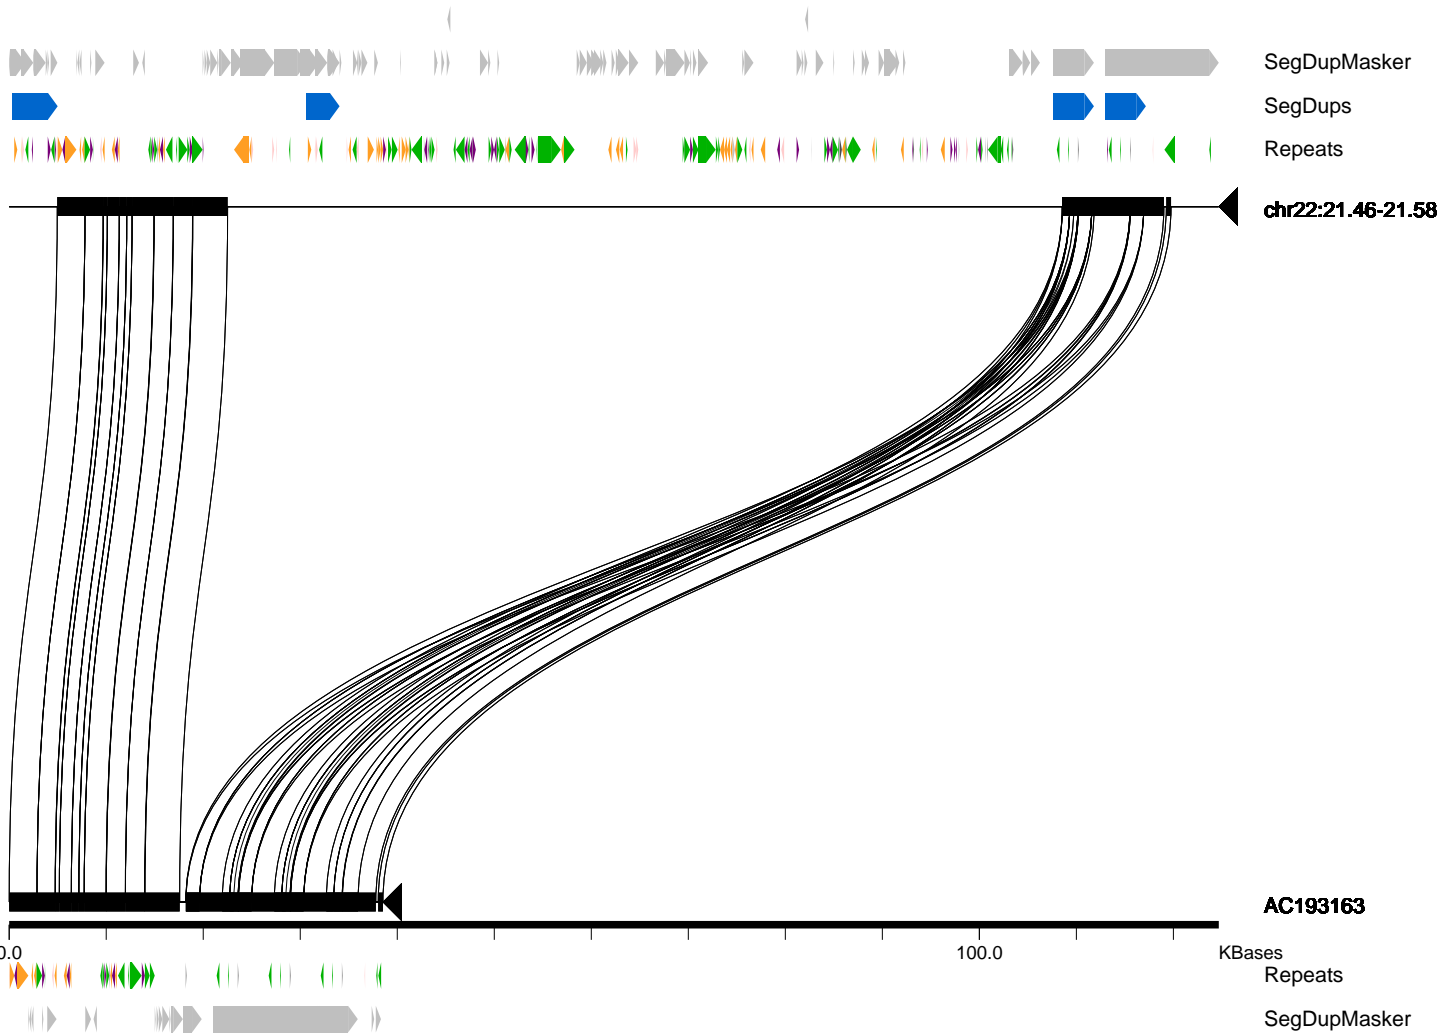

Clone: WIBR2-3059K10 Accession: AC158329

ESP Prediction: B Validation: D Mechanism: NHEJ

Other Simple Repeat Low Complexity DNA LTR LINE SINE

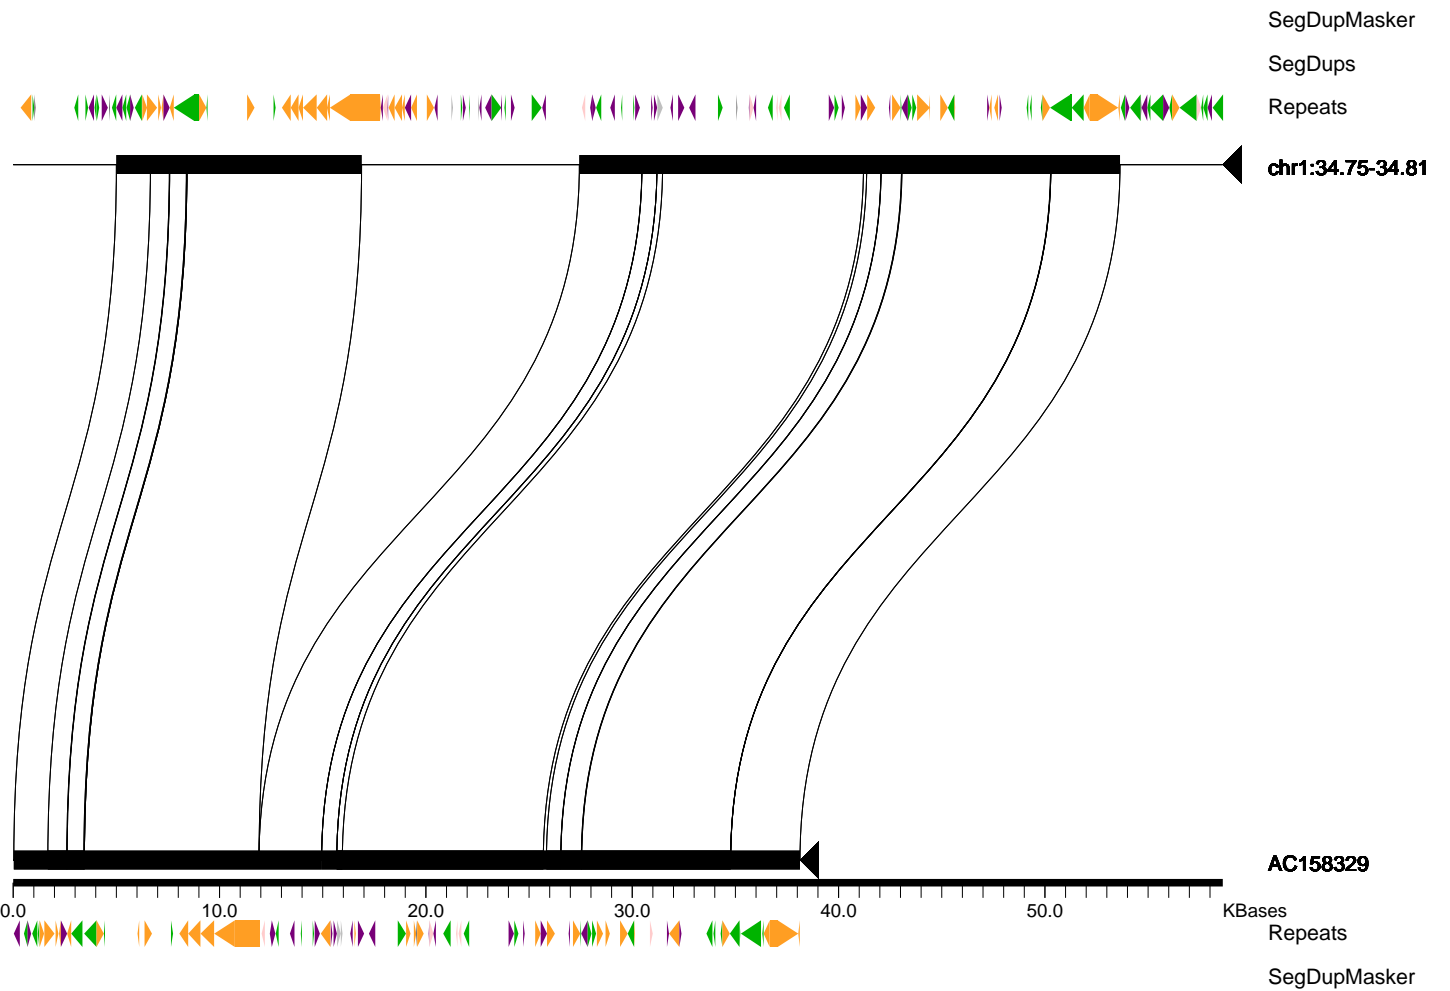

Clone: WIBR2-3072G04 Accession: AC193160

ESP Prediction: B Validation: D Mechanism: NHEJ (AS)

Other Simple Repeat Low Complexity DNA LTR LINE SINE

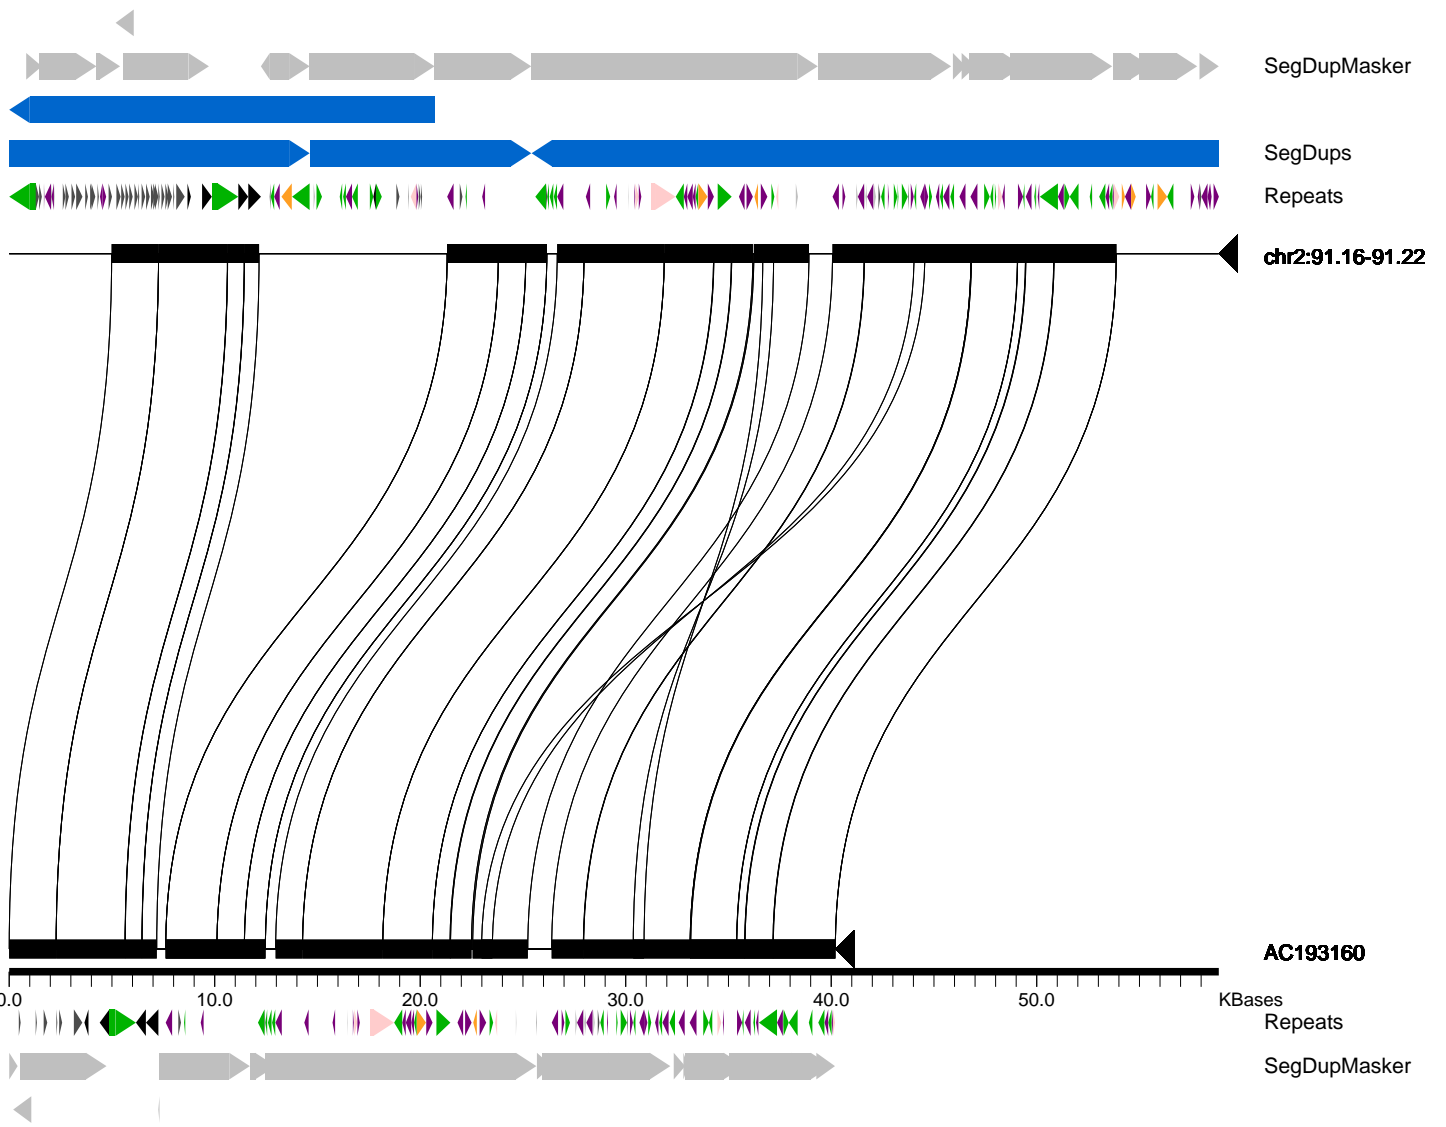

Clone: WIBR2-3682C18 Accession: AC193172

ESP Prediction: S Validation: I Mechanism: NHEJ

Other Simple Repeat Low Complexity DNA LTR LINE SINE

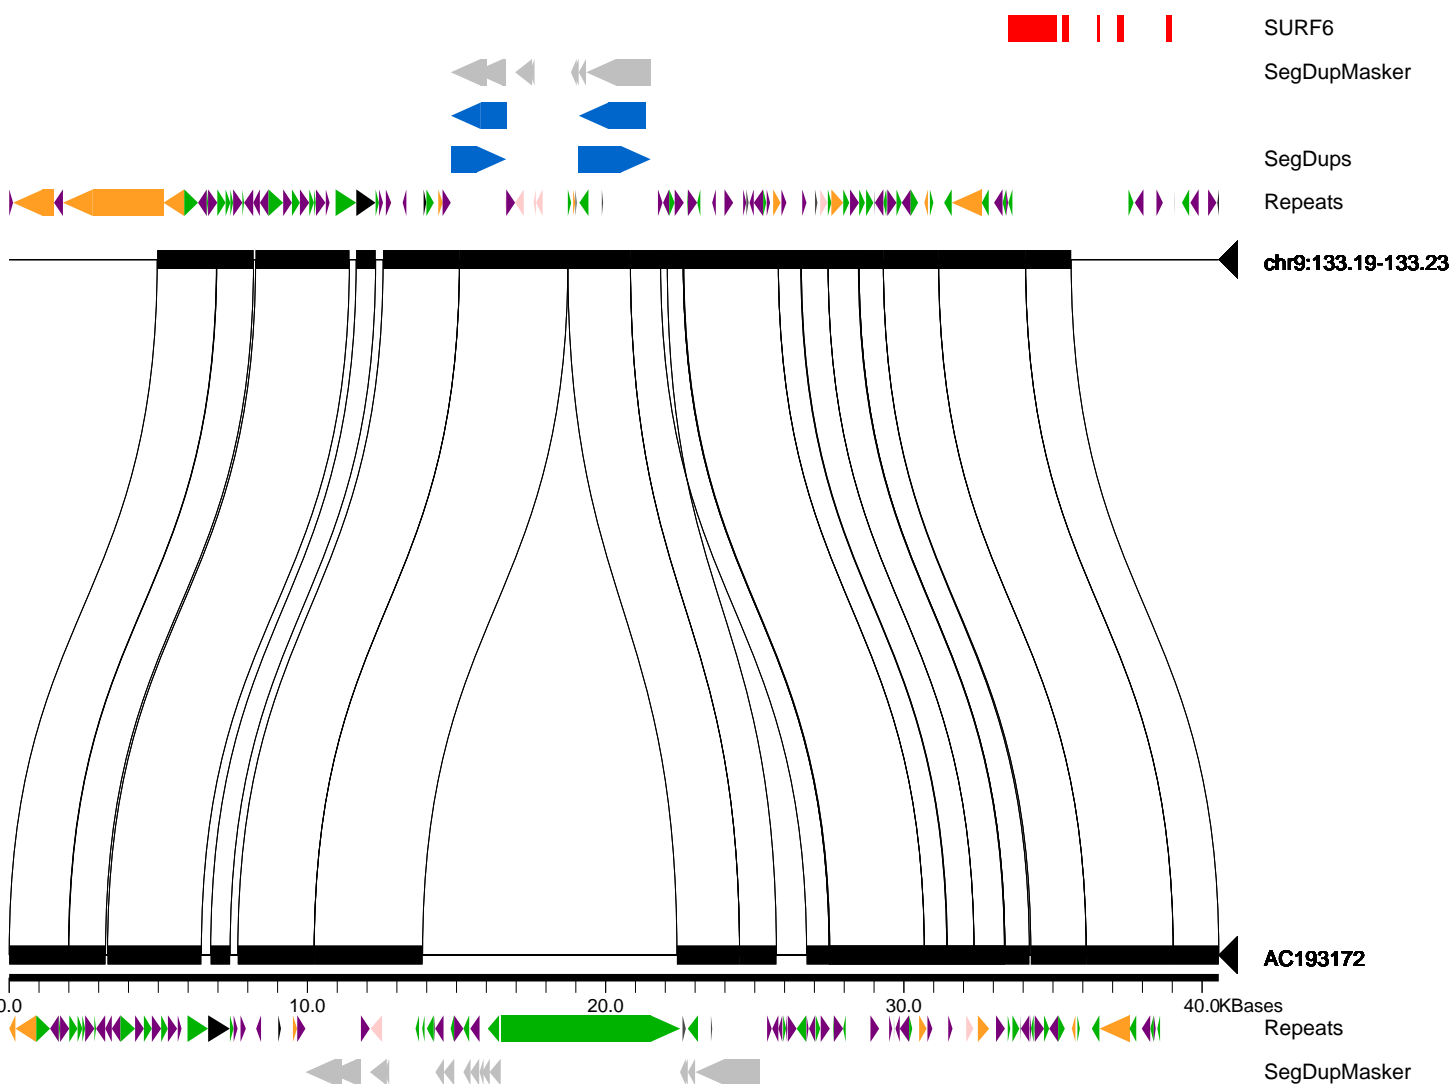

Clone: WIBR2-0647I01 Accession: AC158324

ESP Prediction: S Validation: I Mechanism: NHEJ (AS)

Other Simple Repeat Low Complexity DNA LTR LINE SINE

MEGF11

SegDupMasker

SegDups

Repeats

chr15:64.16-64.19

AC158324

0.0 10.0 20.0 30.0 KBases  
Repeats  
SegDupMasker

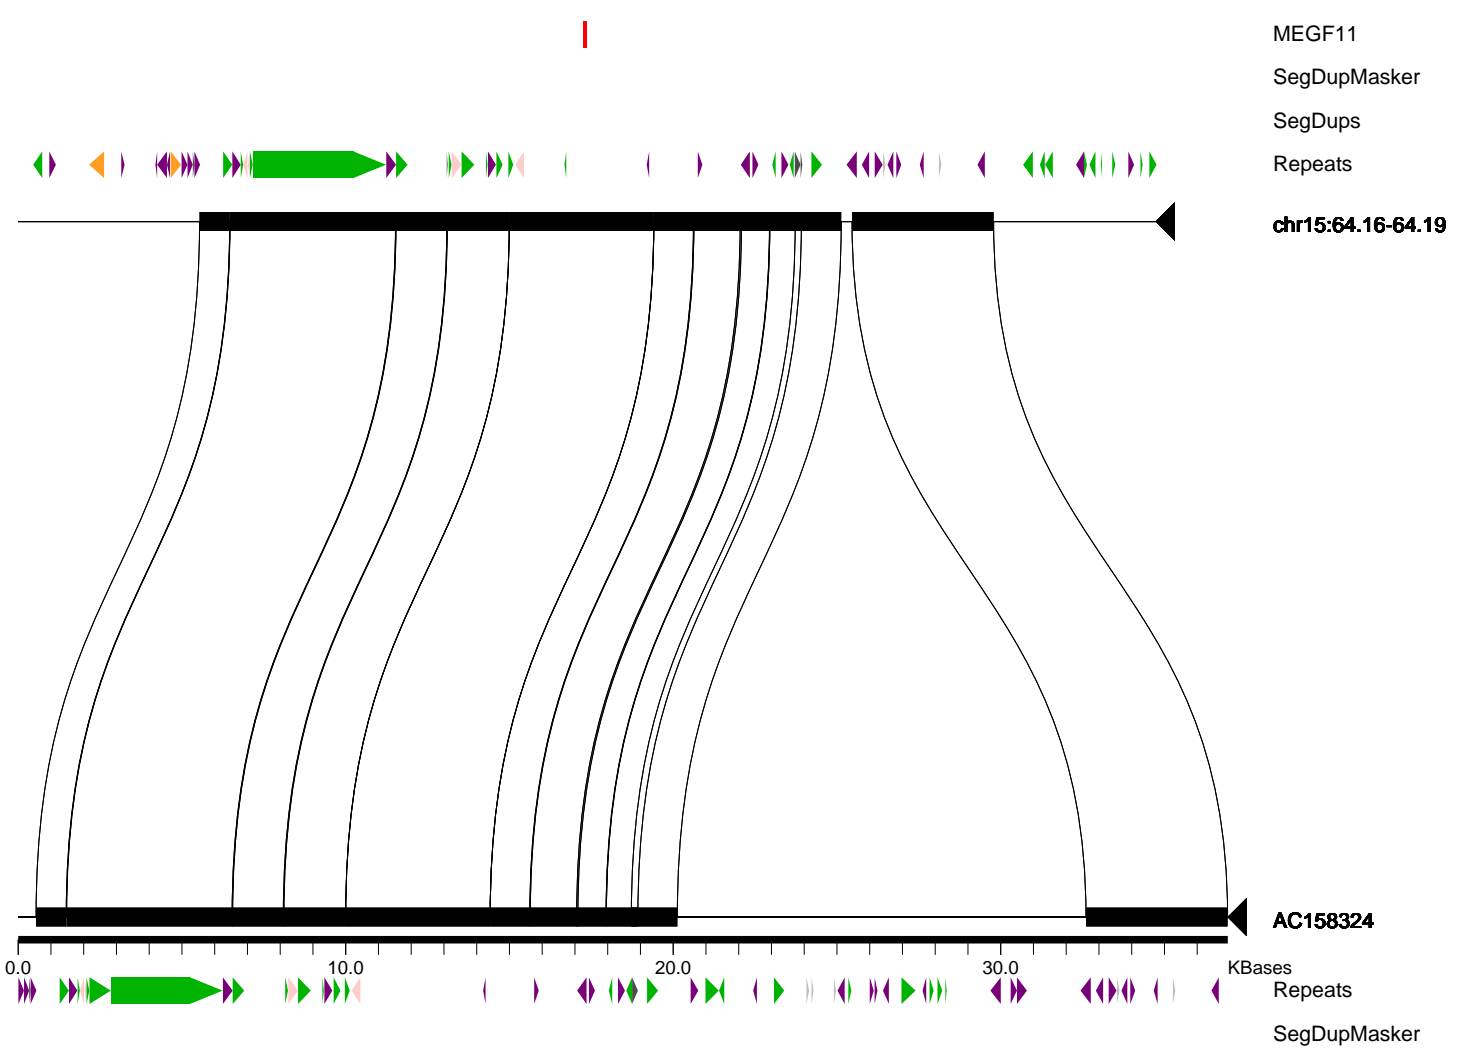

Clone: WIBR2-3651K01 Accession: AC193105

ESP Prediction: S Validation: II Mechanism: NHEJ (AS)

Other Simple Repeat Low Complexity DNA LTR LINE SINE

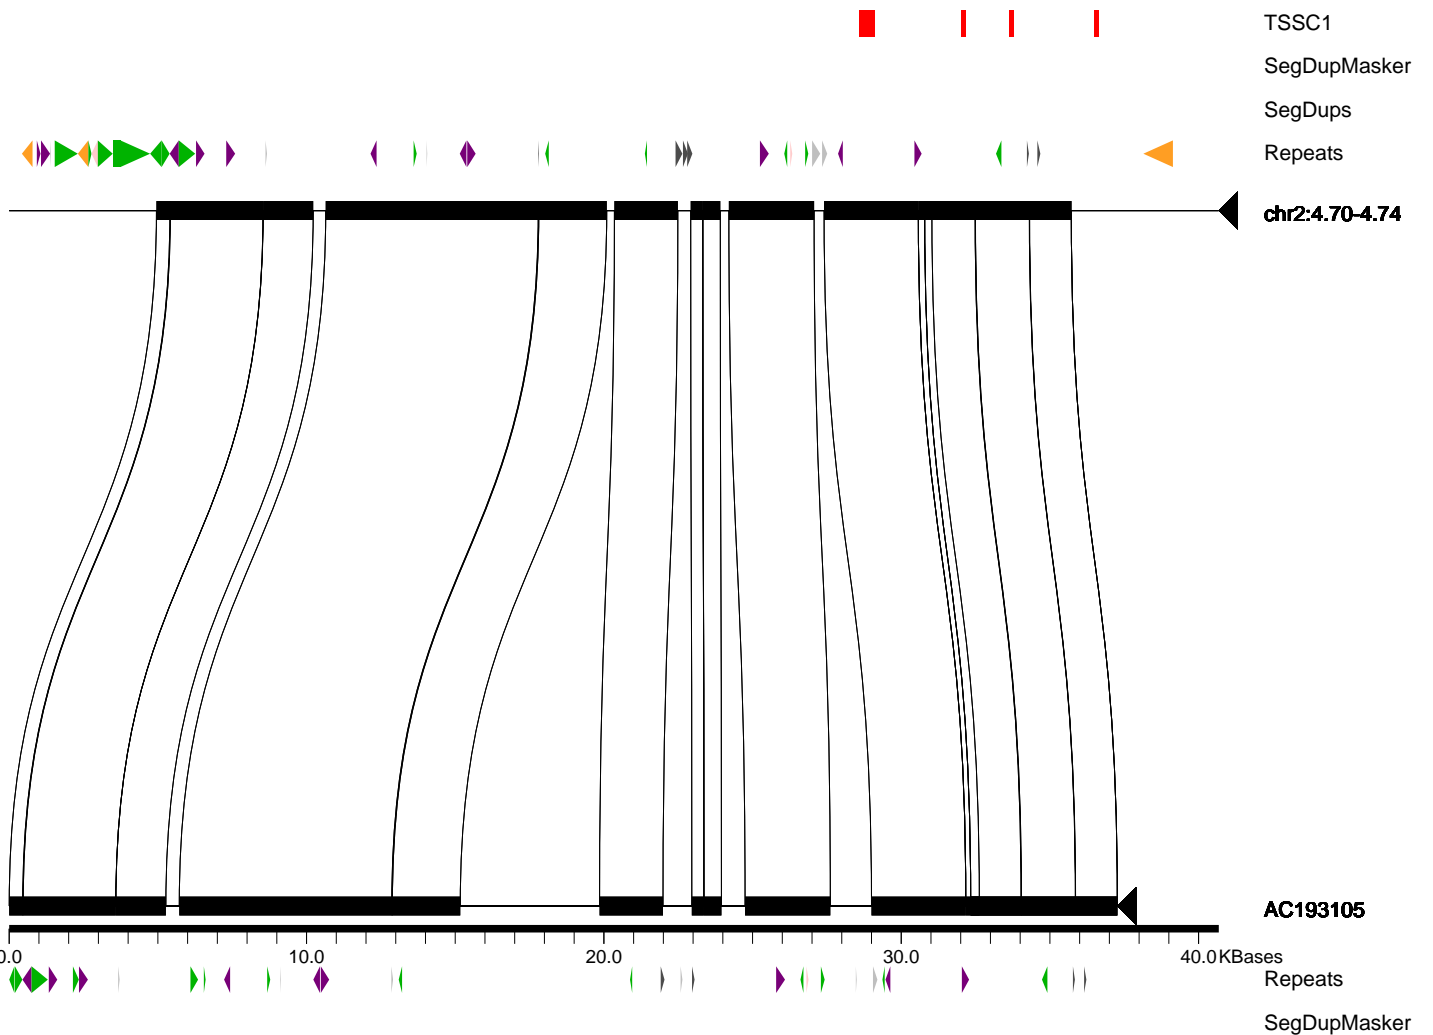

Clone: WIBR2-3714E08 Accession: AC193174

ESP Prediction: B Validation: D Mechanism: NHEJ (AS)

Other Simple Repeat Low Complexity DNA LTR LINE SINE

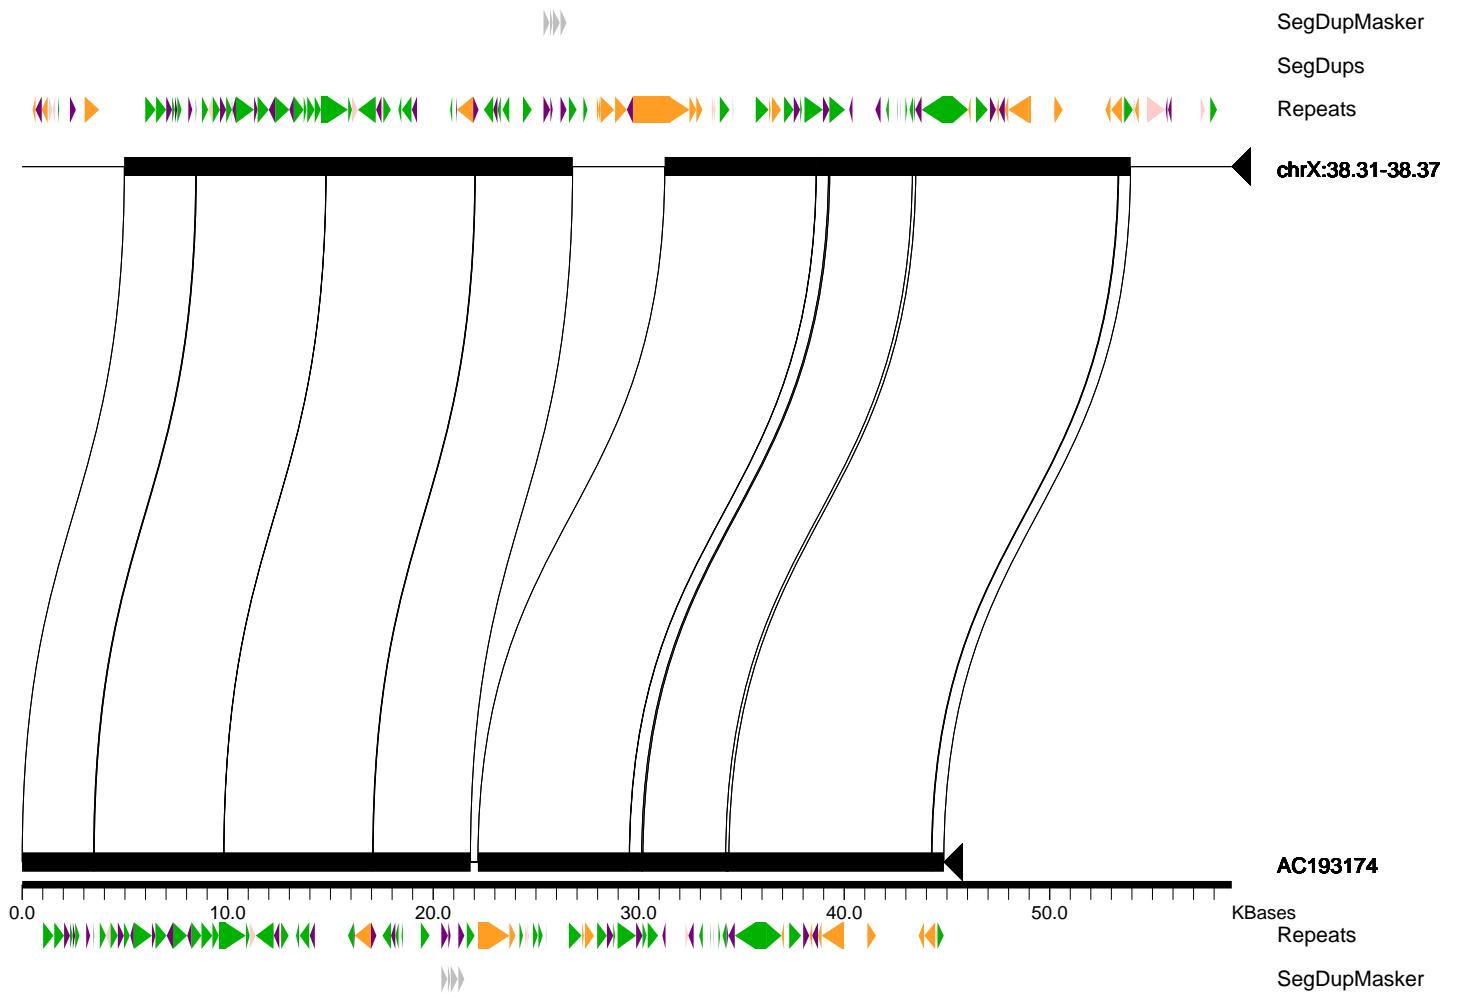

Clone: WIBR2-3379H11 Accession: AC158336

ESP Prediction: B Validation: D Mechanism: NHEJ

Other Simple Repeat Low Complexity DNA LTR LINE SINE

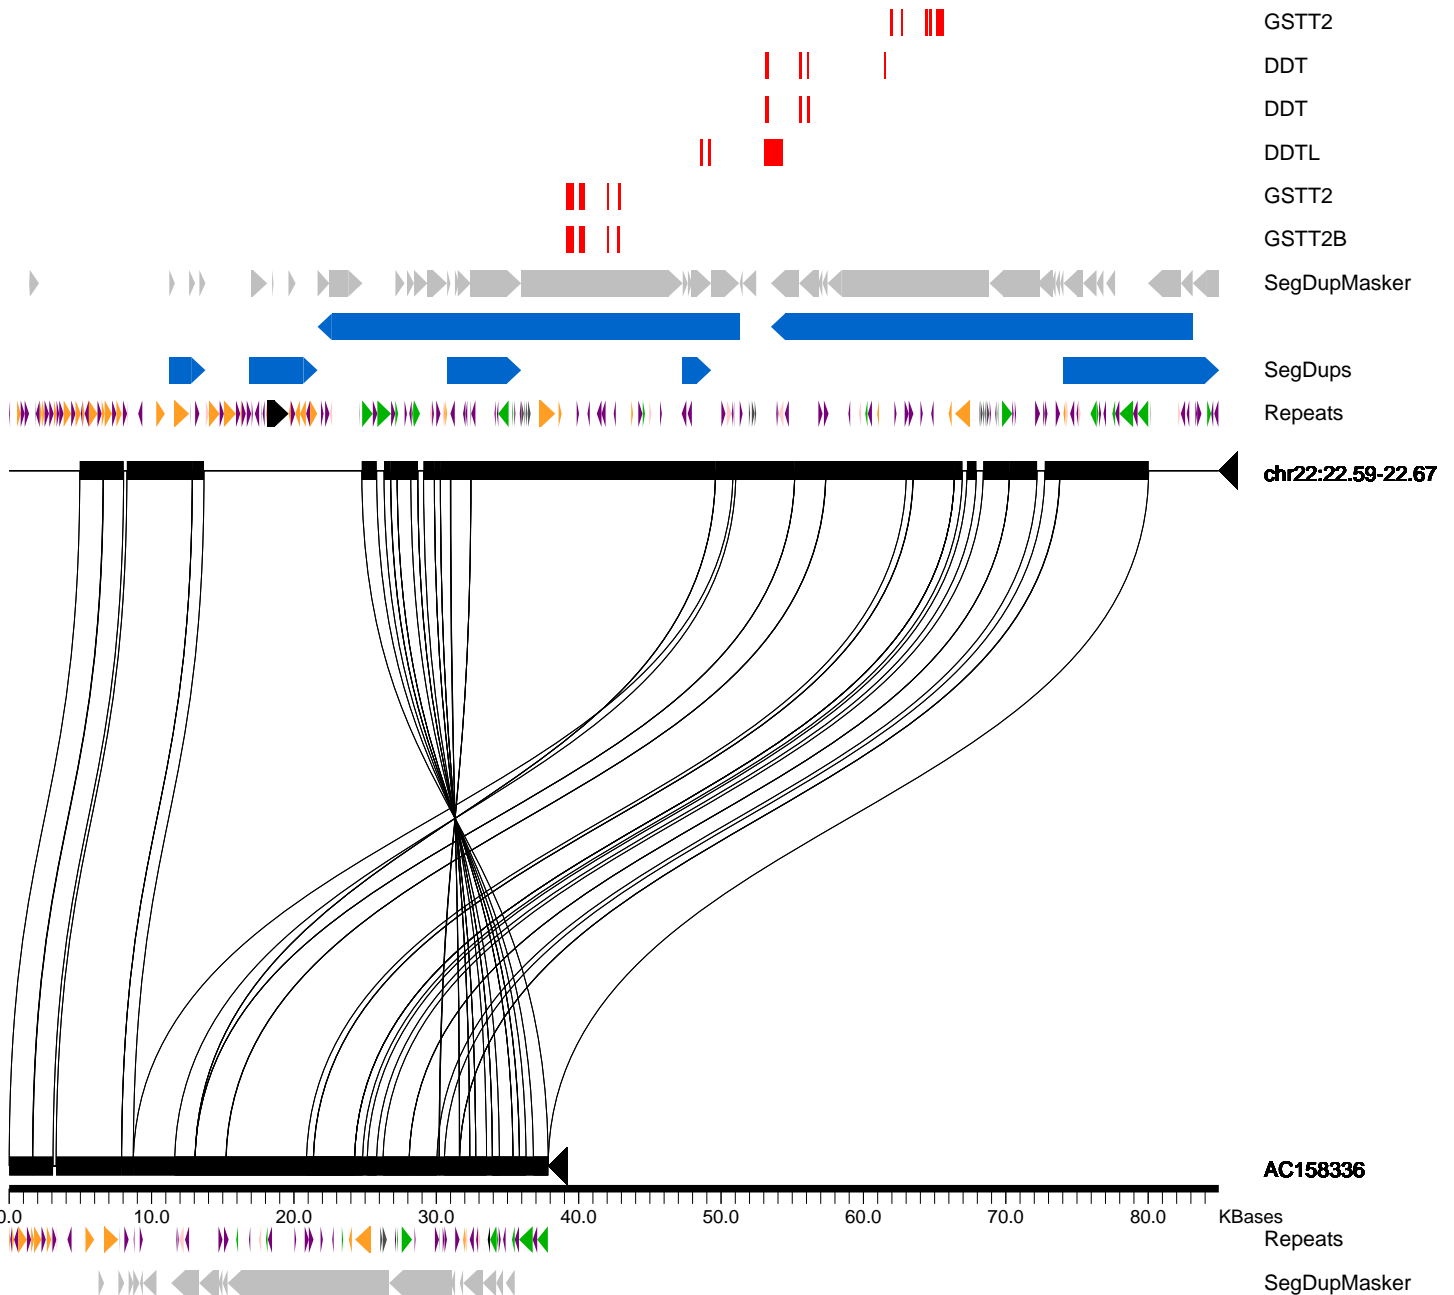



Clone: WIBR2-3430E01 Accession: AC193170

ESP Prediction: B Validation: D Mechanism: NHEJ (AS)

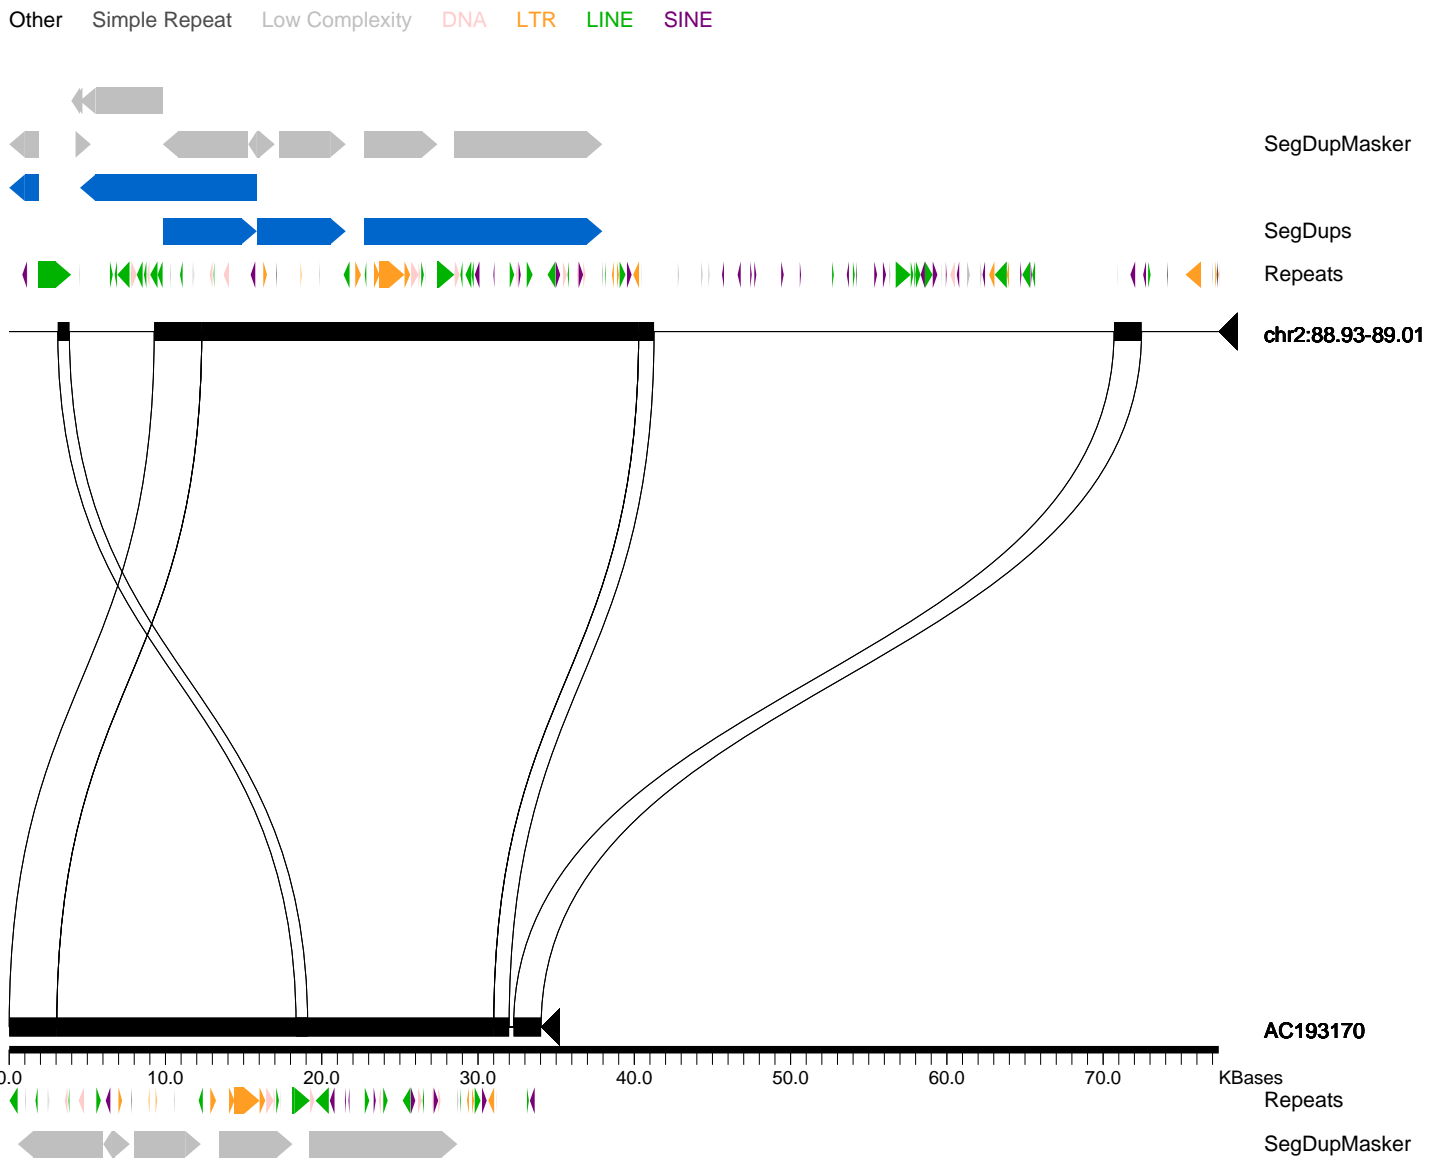

Clone: WIBR2-3439N14 Accession: AC158332

ESP Prediction: B Validation: D Mechanism: NHEJ

Other Simple Repeat Low Complexity DNA LTR LINE SINE

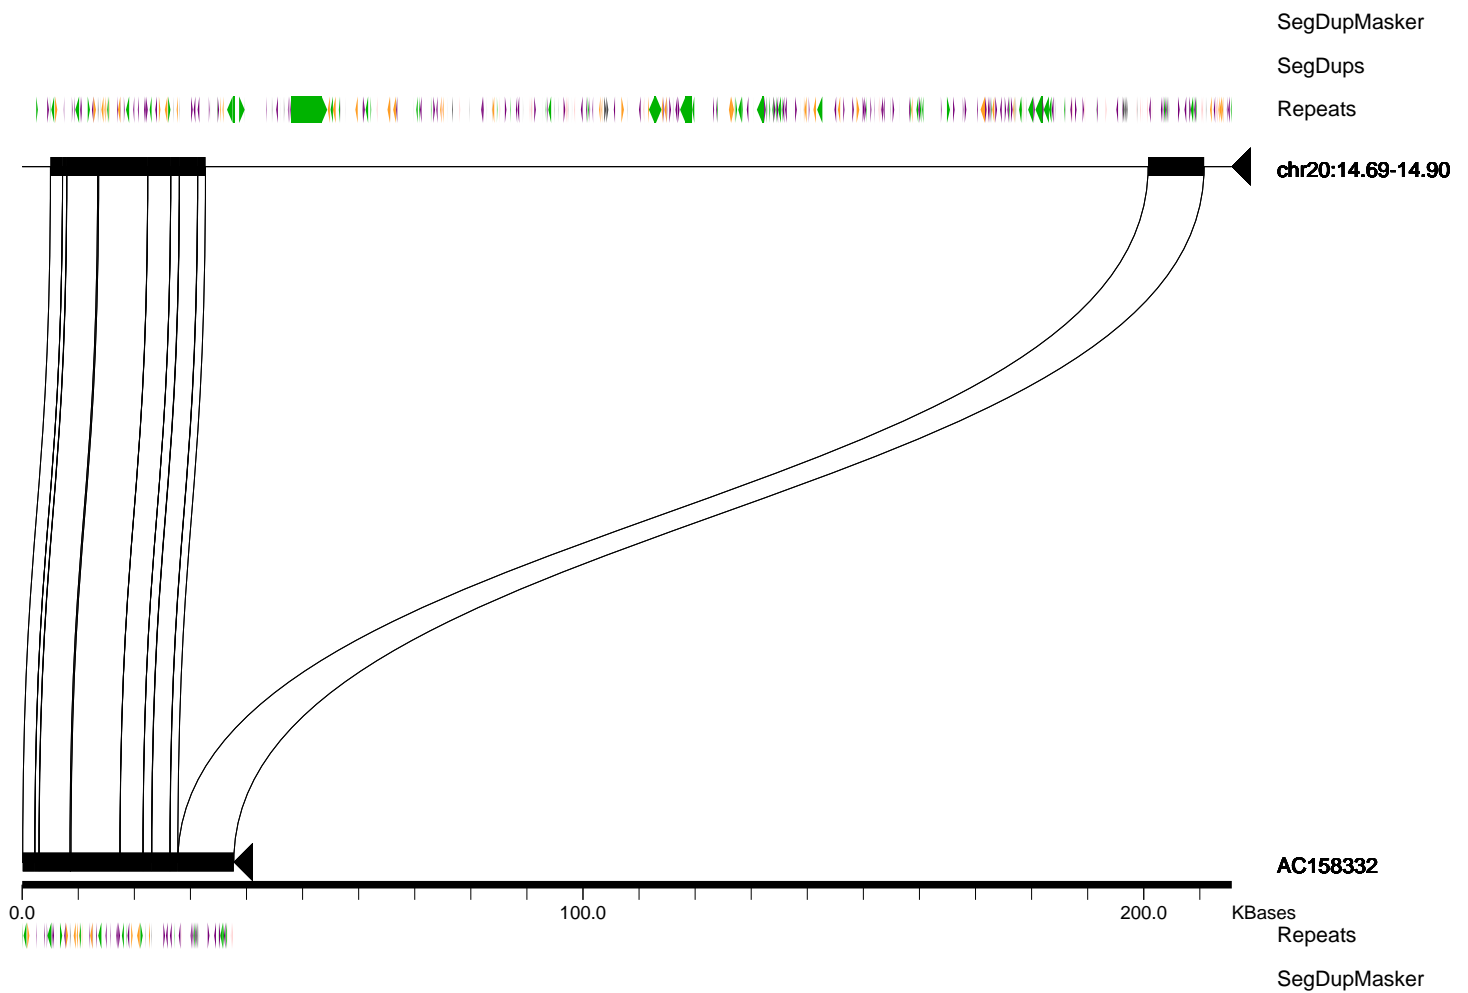

Clone: WIBR2-0913E19 Accession: AC158320

ESP Prediction: S Validation: I Mechanism: NHEJ

Other Simple Repeat Low Complexity DNA LTR LINE SINE

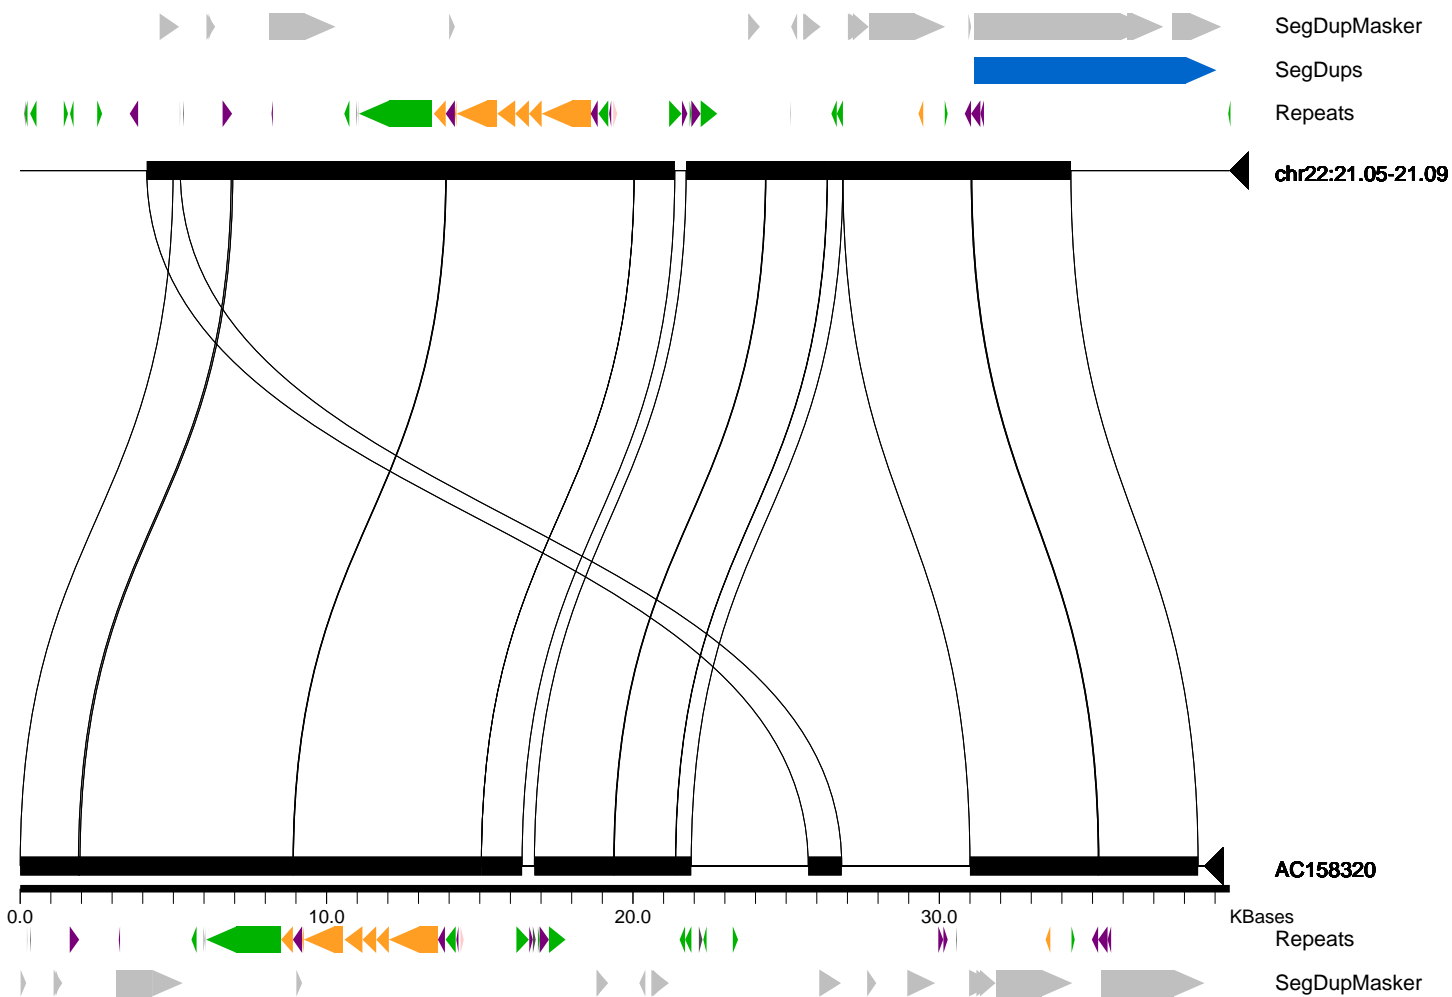

Clone: WIBR2-2423G02 Accession: AC193143

ESP Prediction: B Validation: D Mechanism: NHEJ

Other Simple Repeat Low Complexity DNA LTR LINE SINE

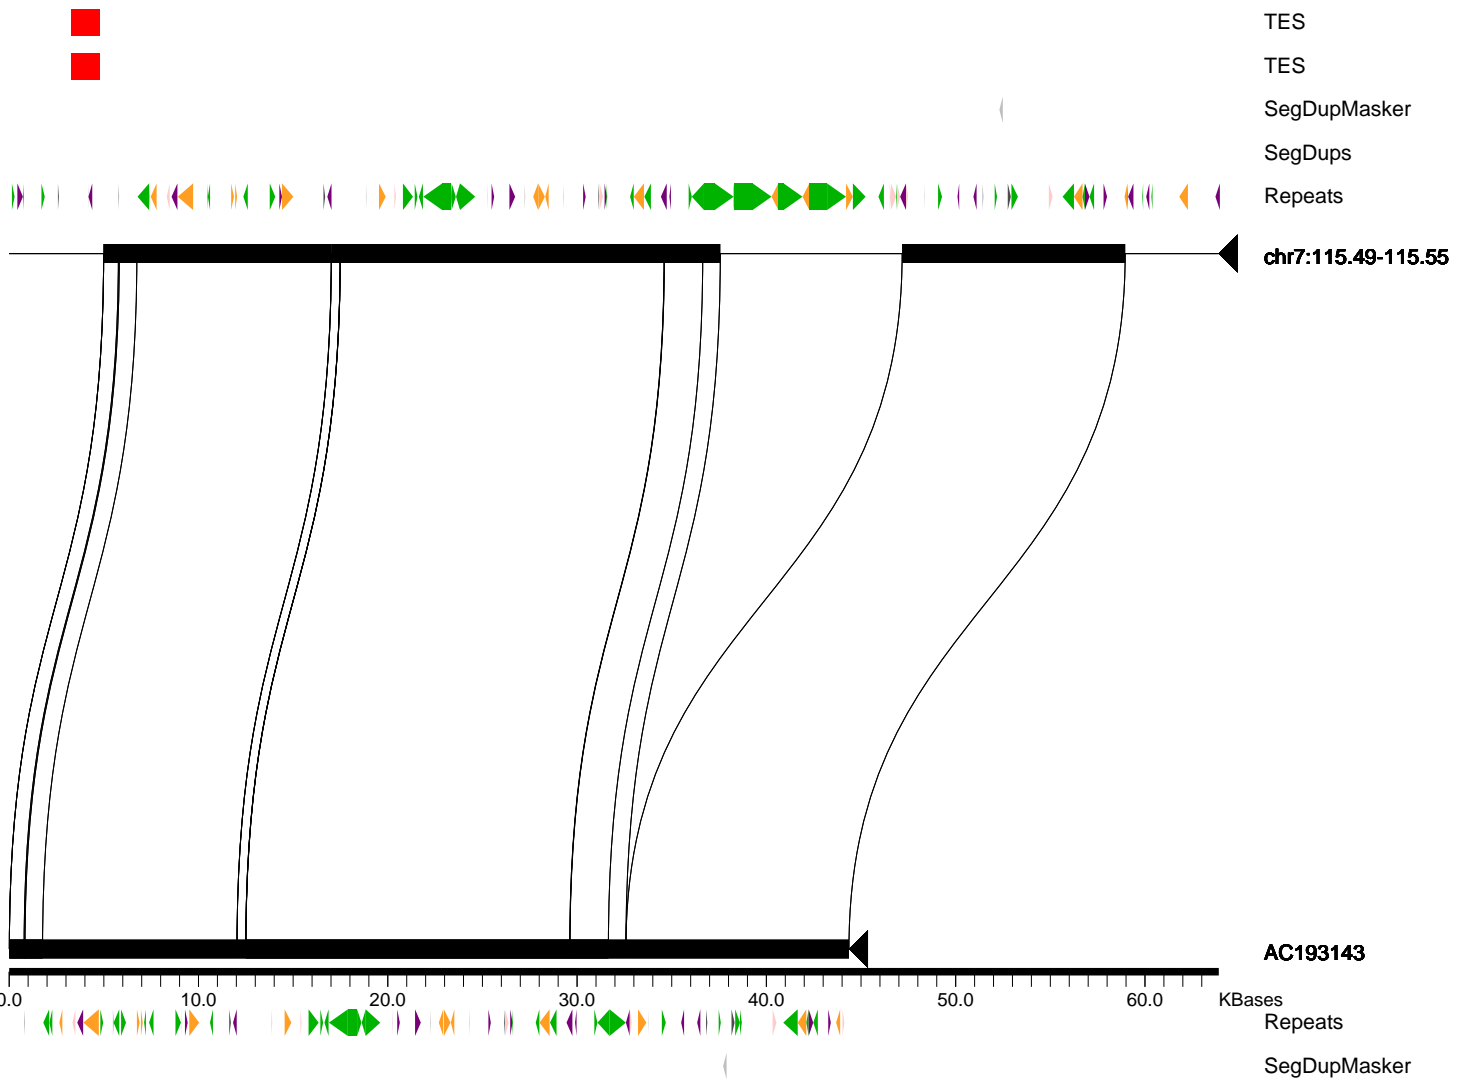

Clone: WIBR2-2433F19 Accession: AC193144

ESP Prediction: B Validation: D Mechanism: NHEJ

Other Simple Repeat Low Complexity DNA LTR LINE SINE

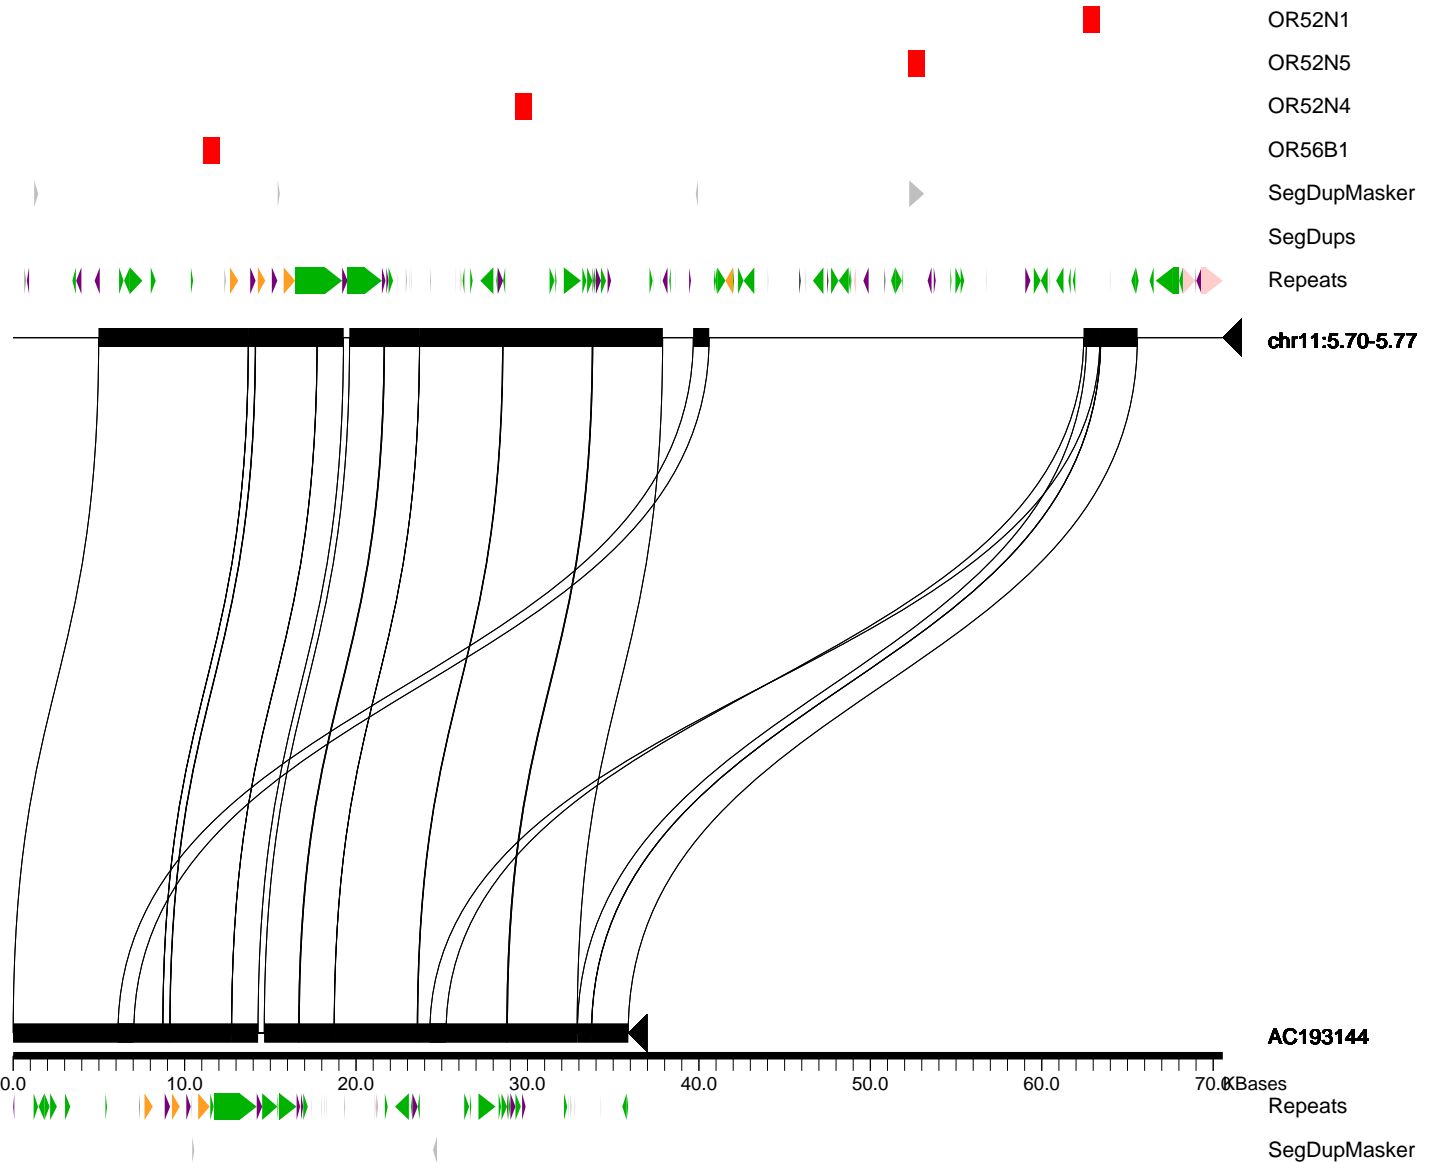

Clone: WIBR2-2458K22 Accession: AC193146

ESP Prediction: S Validation: IVII Mechanism: NHEJ

Other Simple Repeat Low Complexity DNA LTR LINE SINE

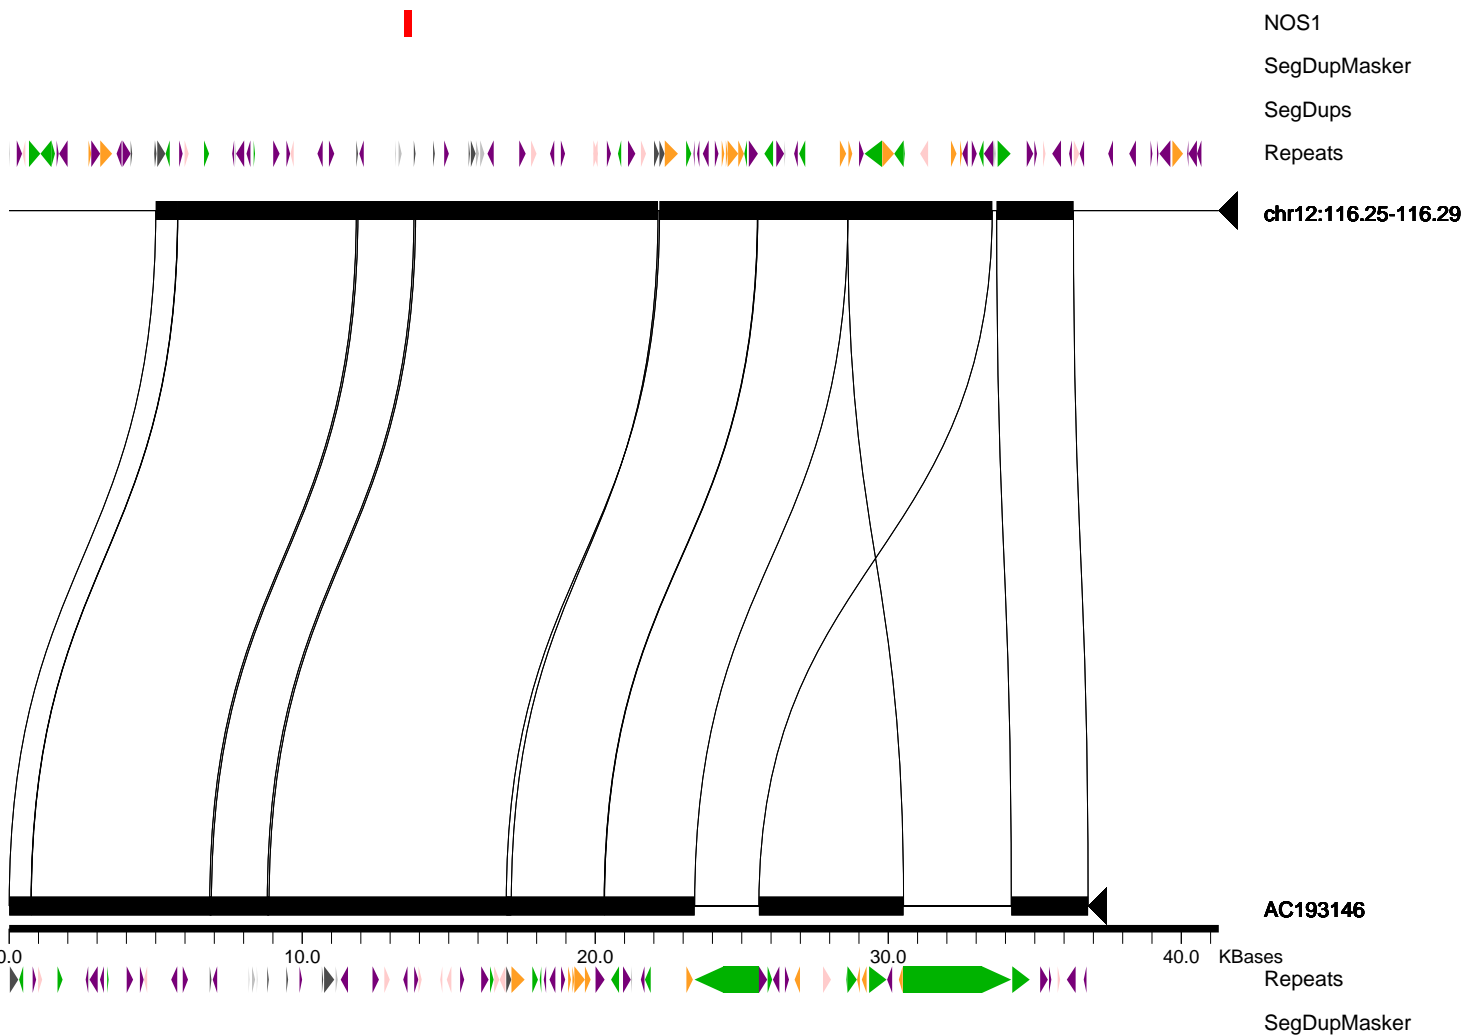

Clone: WIBR2-0948H07 Accession: AC153461

ESP Prediction: S Validation: I Mechanism: NHEJ?

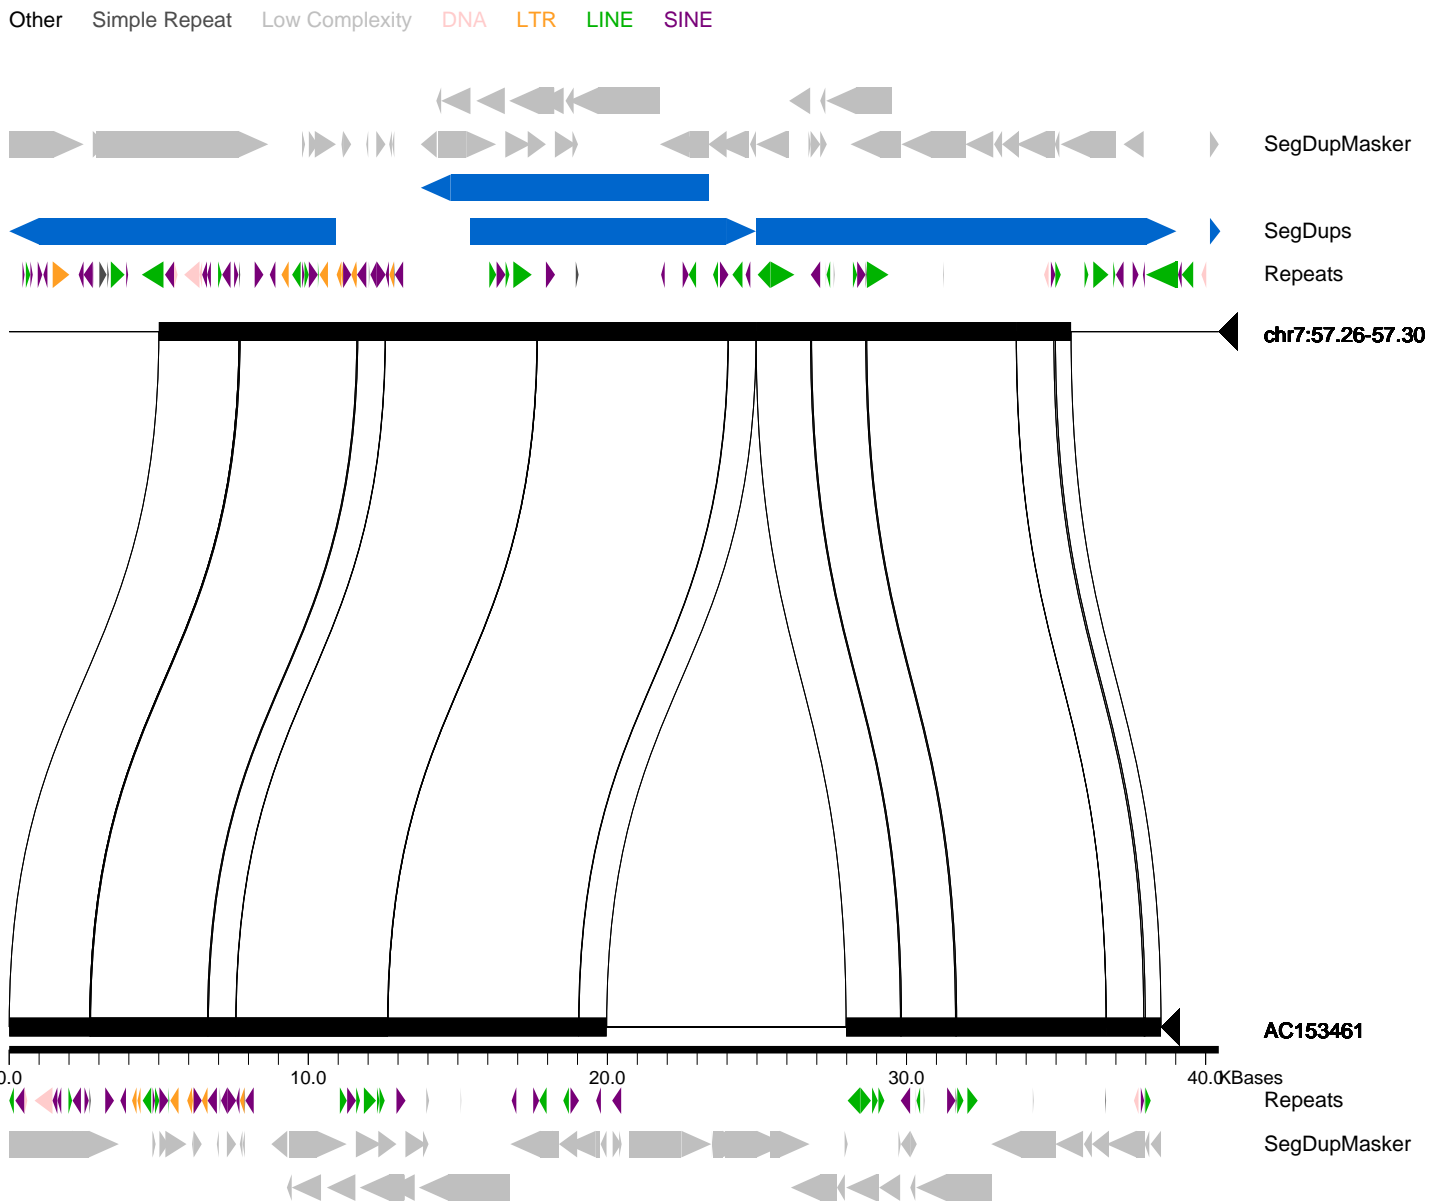

Clone: WIBR2-2354C12 Accession: AC213212

ESP Prediction: B Validation: D Mechanism: NHEJ

Other Simple Repeat Low Complexity DNA LTR LINE SINE

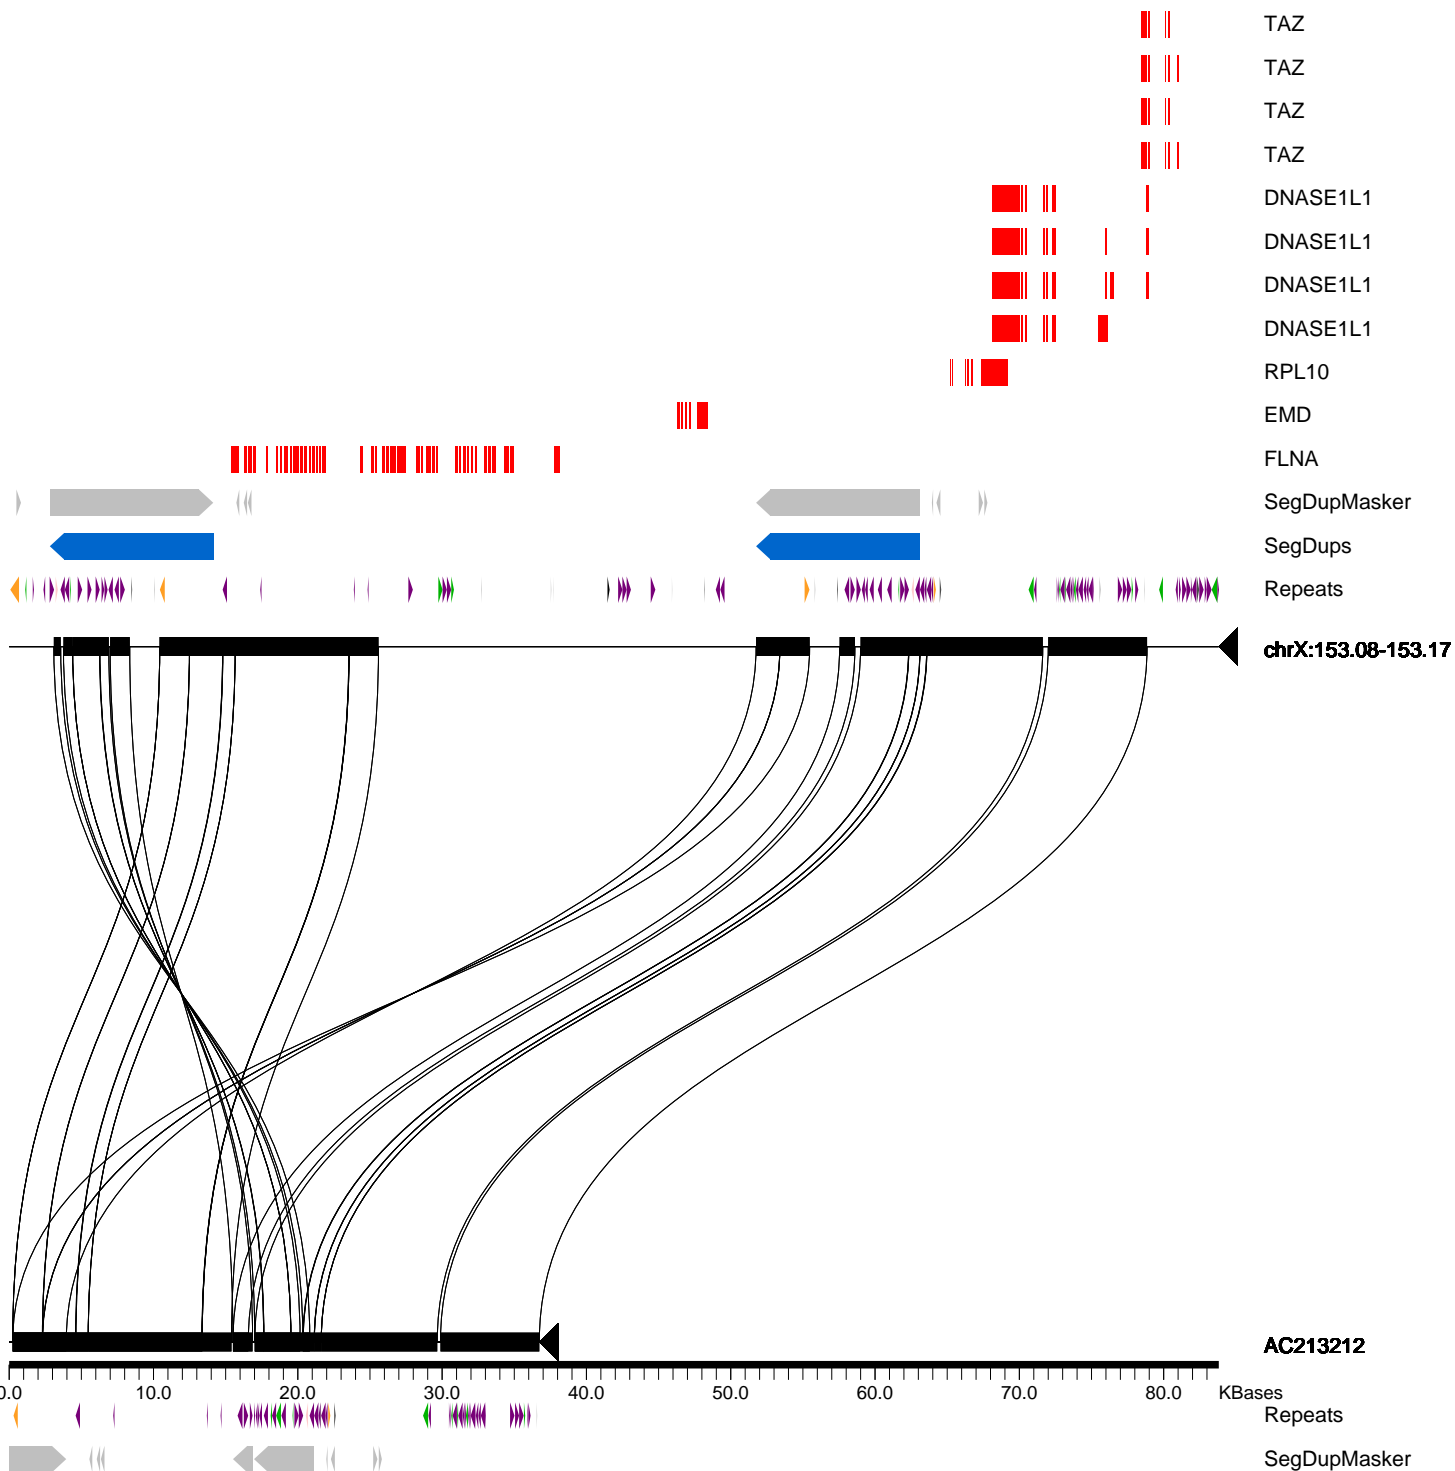



Clone: WIBR2-2563J11 Accession: AC196533

ESP Prediction: B Validation: DD Mechanism: NHEJ/NAHR

Other Simple Repeat Low Complexity DNA LTR LINE SINE

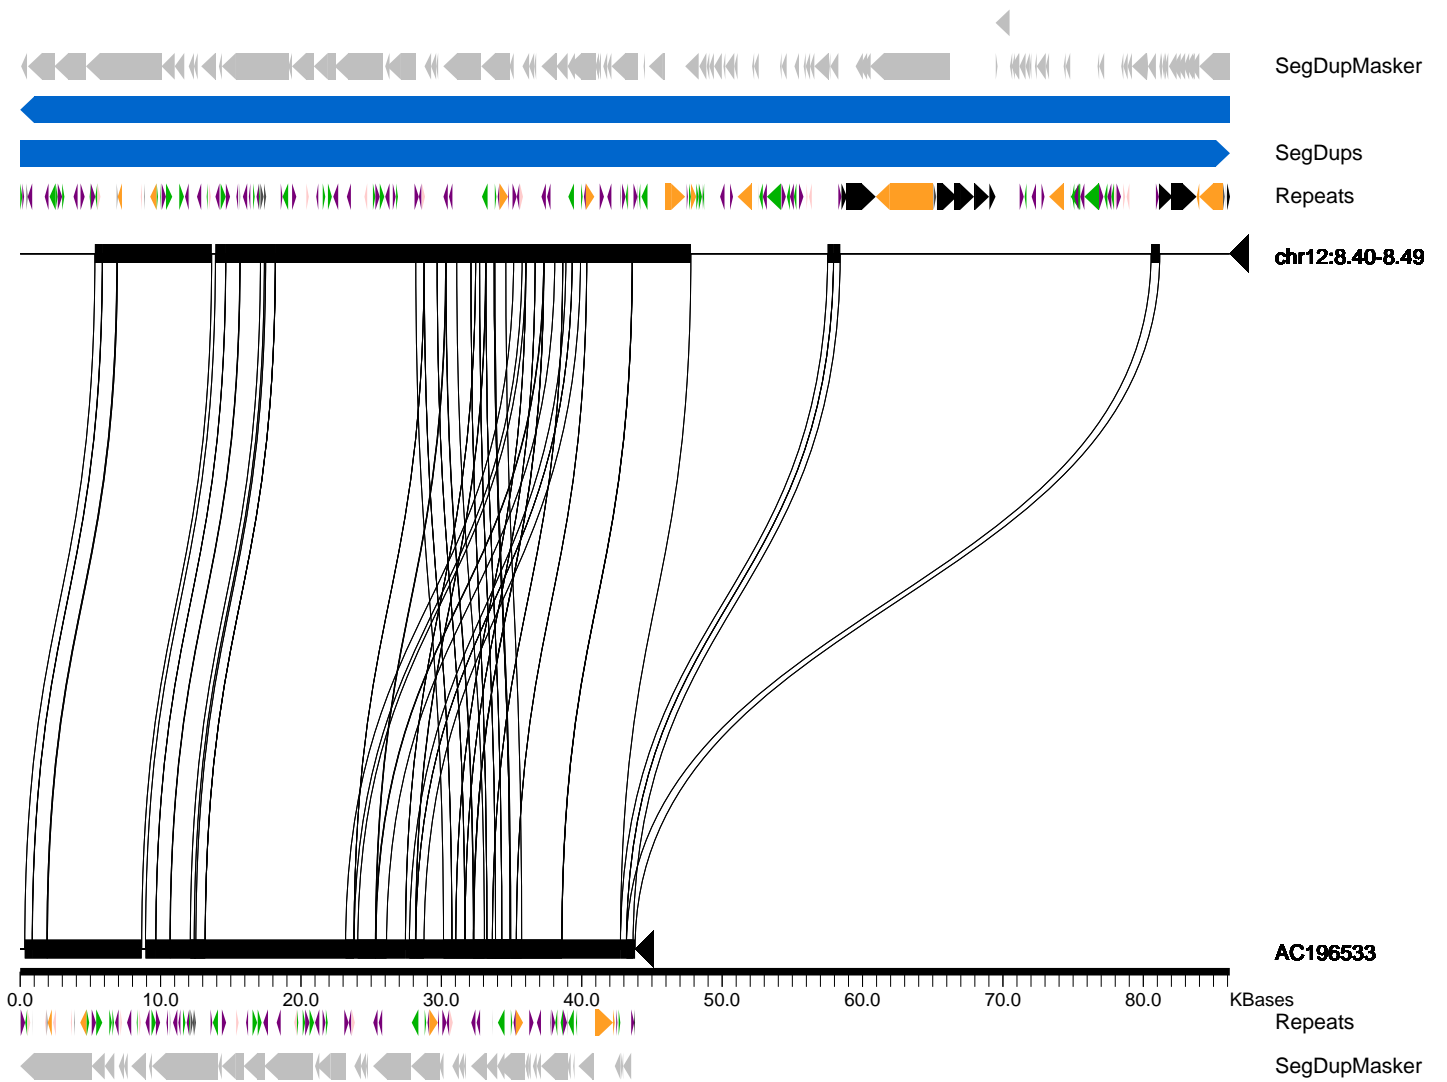

Clone: WIBR2-2389D22 Accession: AC196530

ESP Prediction: B Validation: D Mechanism: NHEJ (AS)

Other Simple Repeat Low Complexity DNA LTR LINE SINE

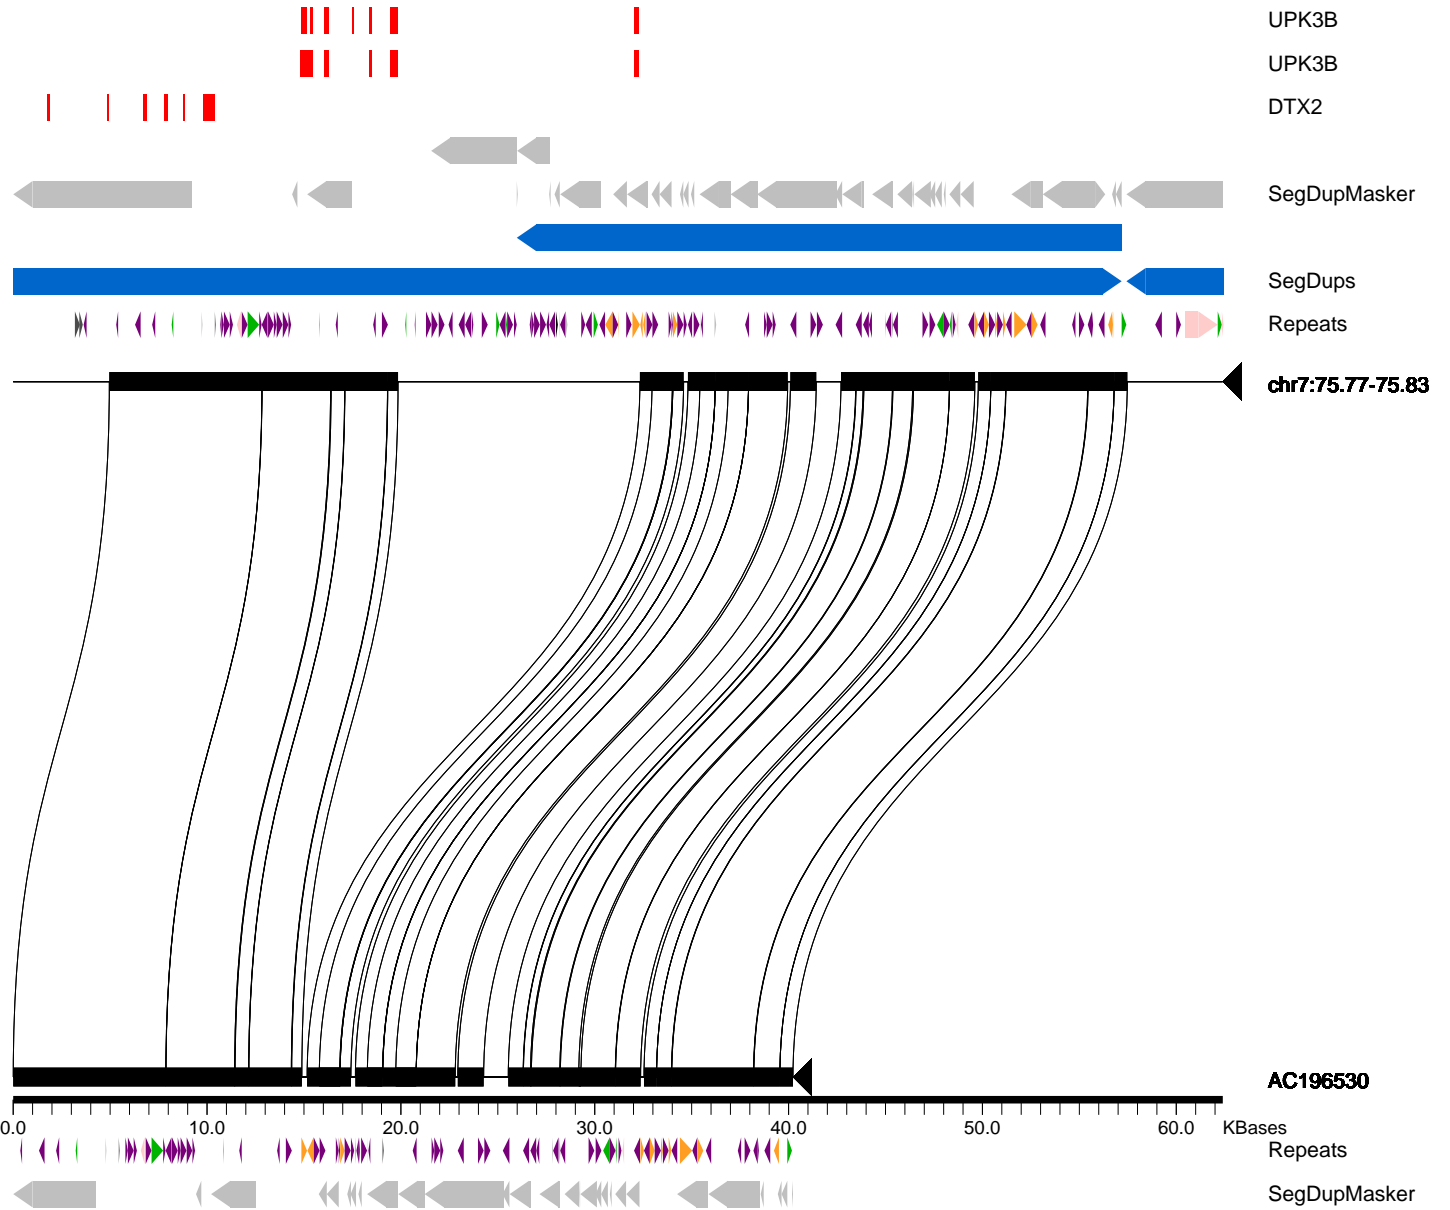

Clone: WIBR2-2450P01 Accession: AC193145

ESP Prediction: B Validation: DDD,complex Mechanism: NHEJ

Other Simple Repeat Low Complexity DNA LTR LINE SINE

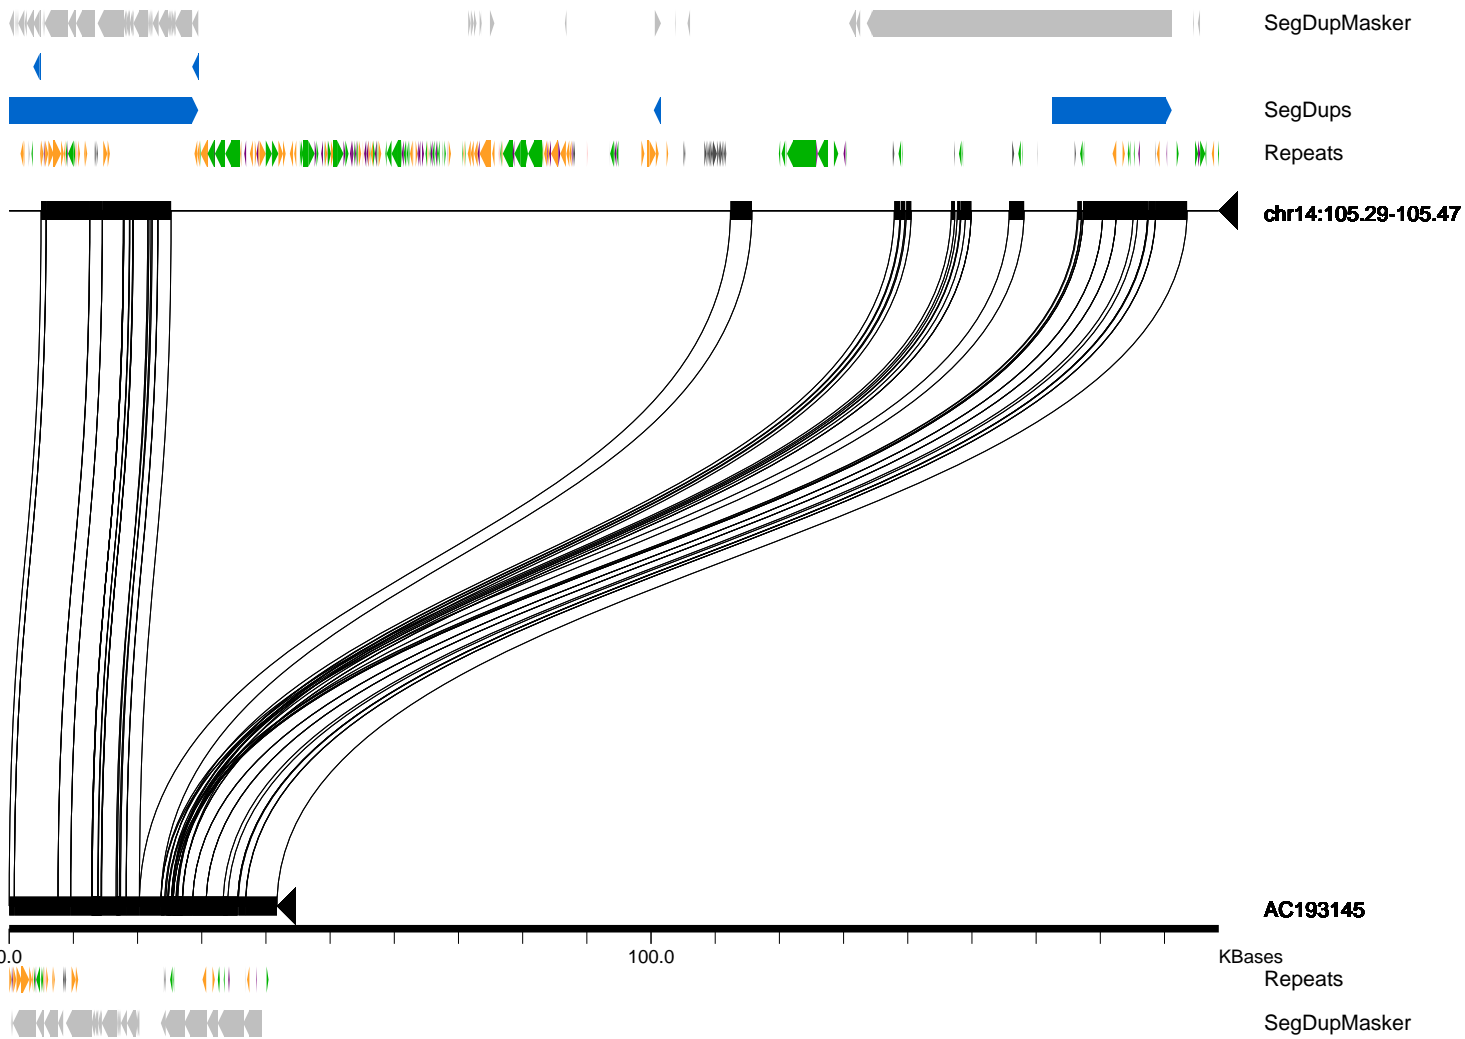

Clone: WIBR2-1526M03 Accession: AC196515

ESP Prediction: S Validation: I Mechanism: NHEJ (AS)

Other Simple Repeat Low Complexity DNA LTR LINE SINE

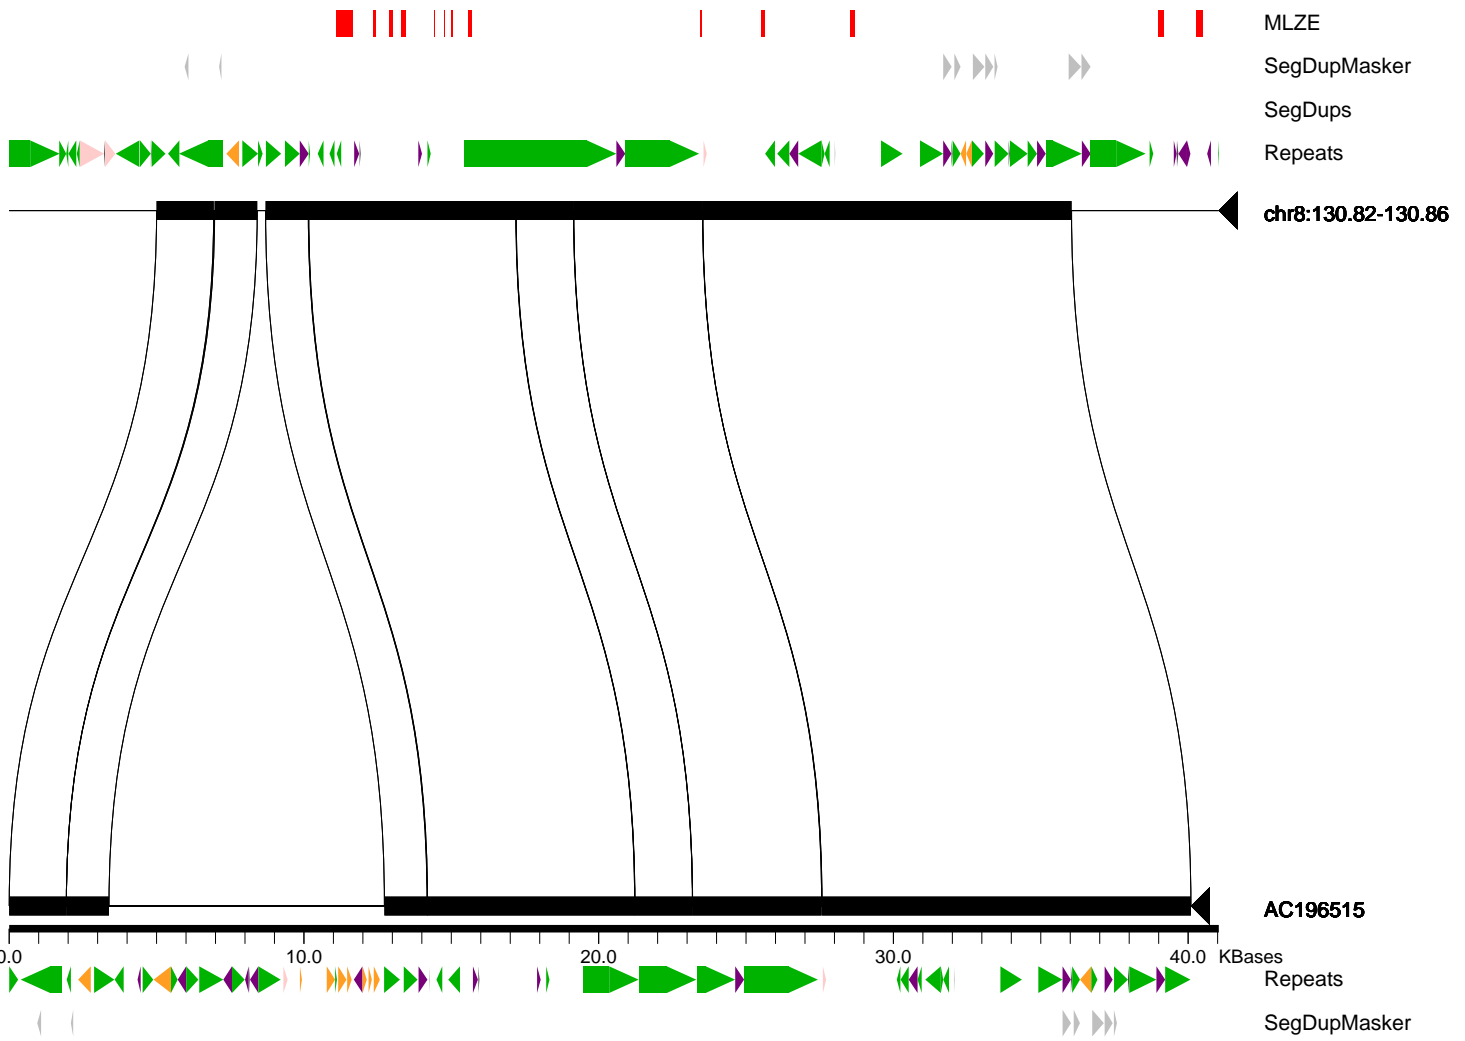

Clone: WIBR2-1419M08 Accession: AC193121

ESP Prediction: B Validation: D Mechanism: NHEJ

Other Simple Repeat Low Complexity DNA LTR LINE SINE

SegDupMasker

SegDups

Repeats

chr2:126.12-126.18

AC193121

Repeats

SegDupMasker

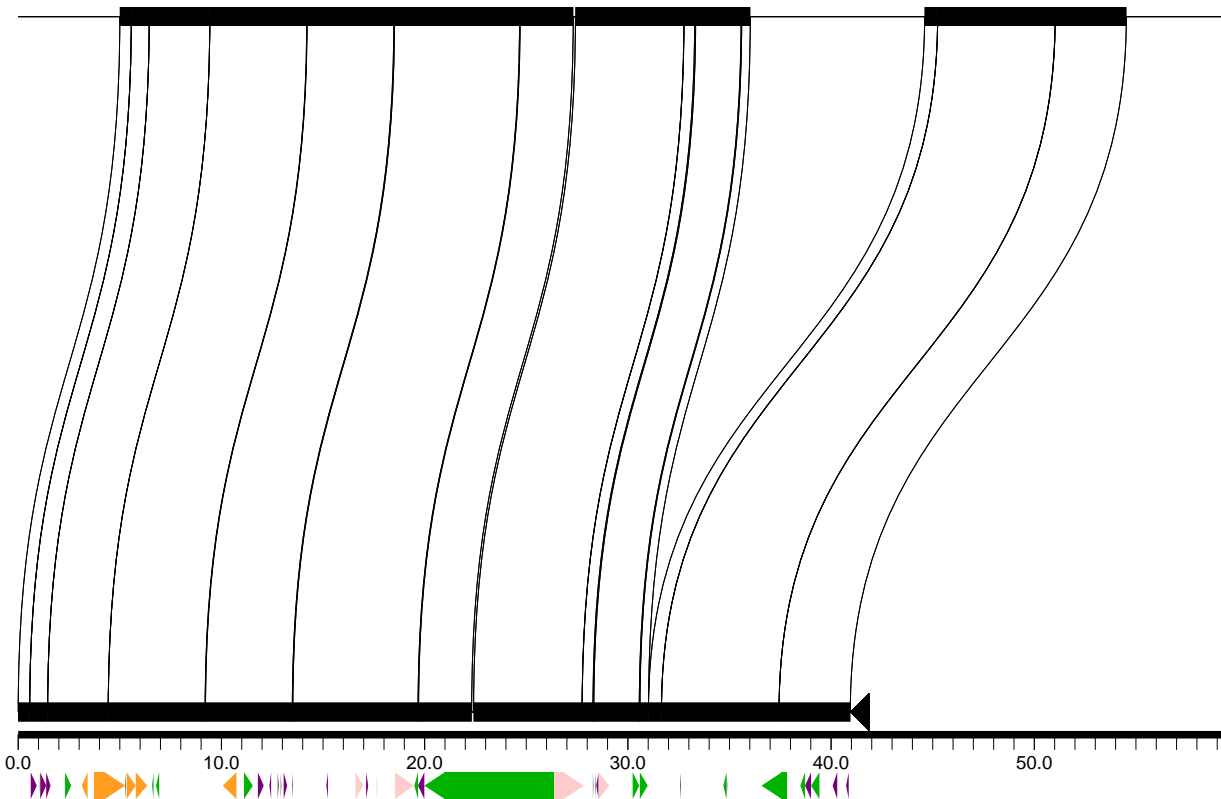

Clone: WIBR2-0486E17 Accession: AC195745

ESP Prediction: S Validation: I/V Mechanism: NHEJ

Other Simple Repeat Low Complexity DNA LTR LINE SINE

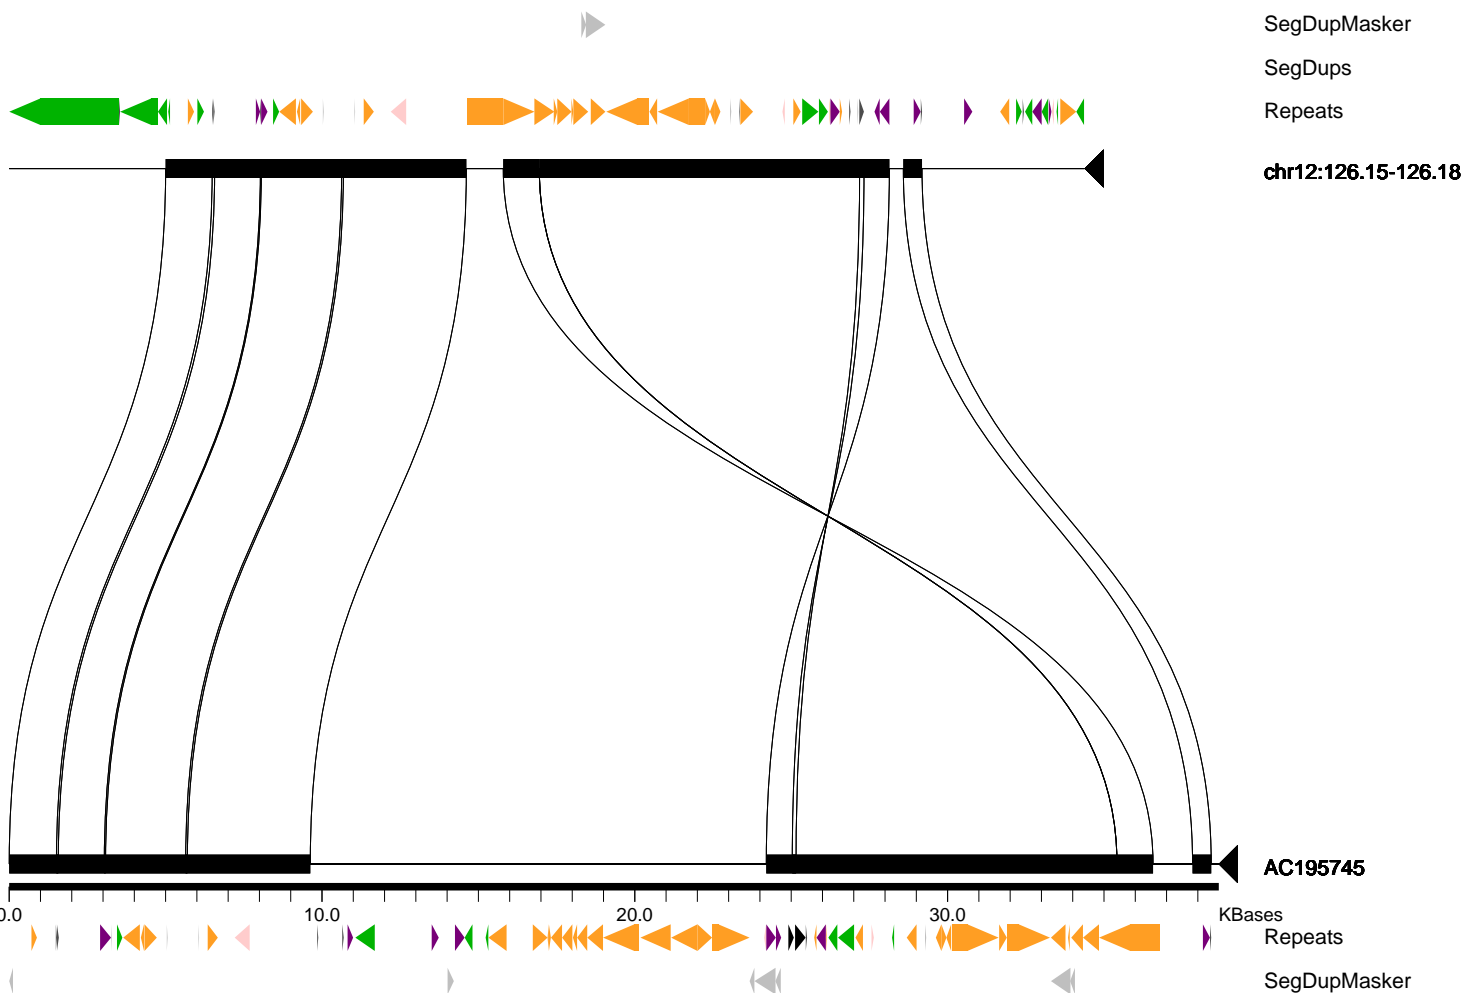

Clone: WIBR2-0993J18 Accession: AC196512

ESP Prediction: B Validation: D Mechanism: NHEJ

Other Simple Repeat Low Complexity DNA LTR LINE SINE

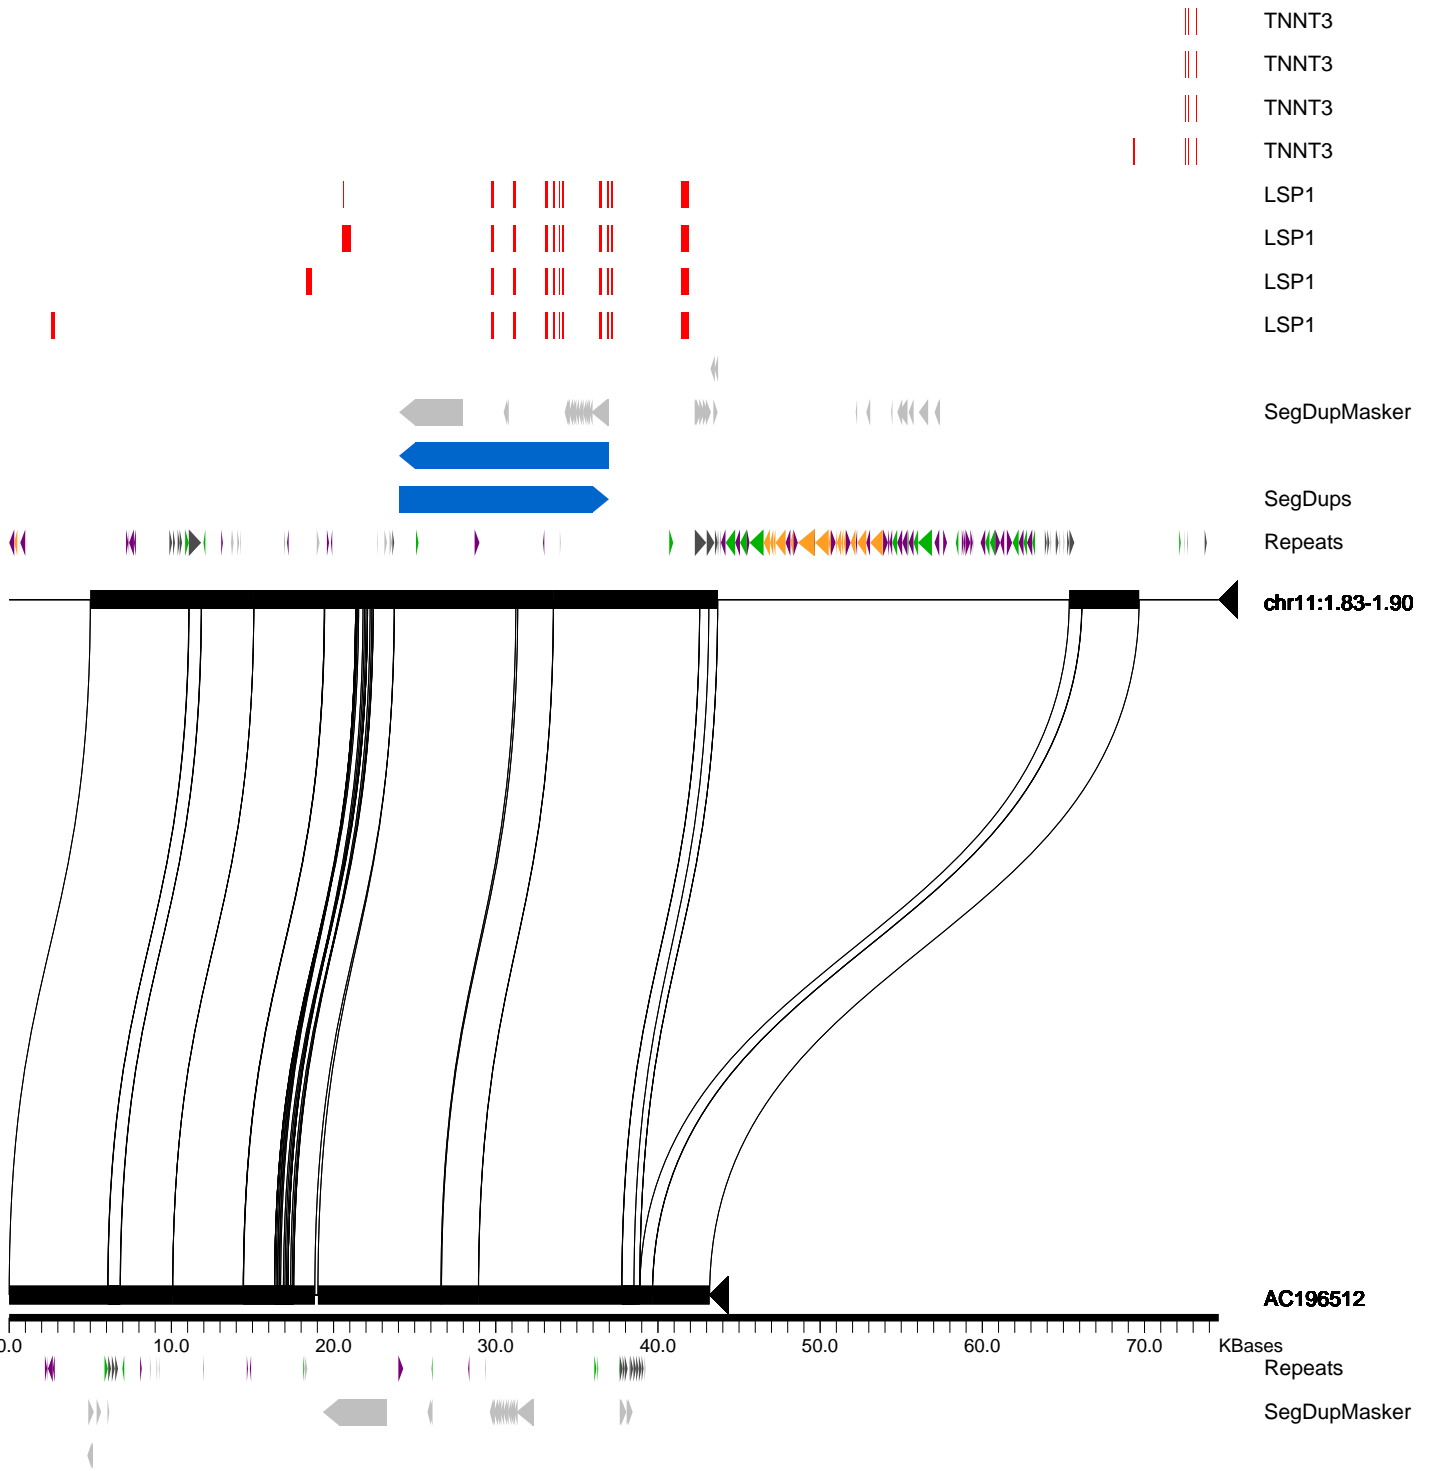

Clone: WIBR2-1942A08 Accession: AC153475

ESP Prediction: S Validation: II Mechanism: NHEJ

Other Simple Repeat Low Complexity DNA LTR LINE SINE

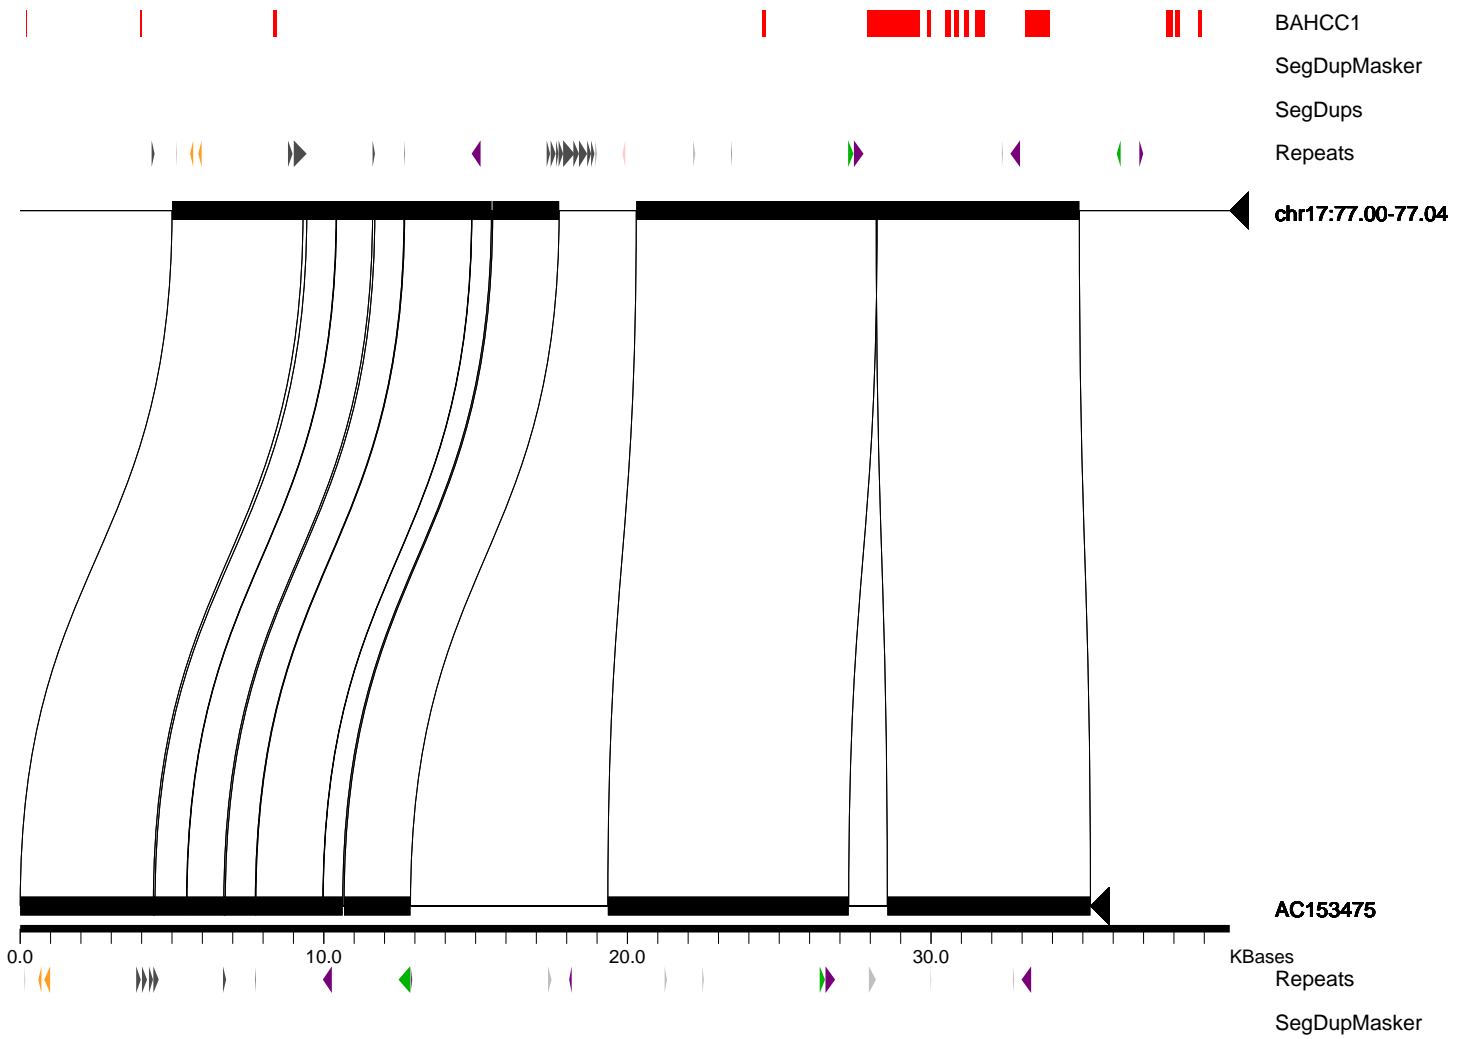



Clone: WIBR2-1950B23 Accession: AC196520

ESP Prediction: S Validation: I Mechanism: NHEJ (AS)

Other Simple Repeat Low Complexity DNA LTR LINE SINE

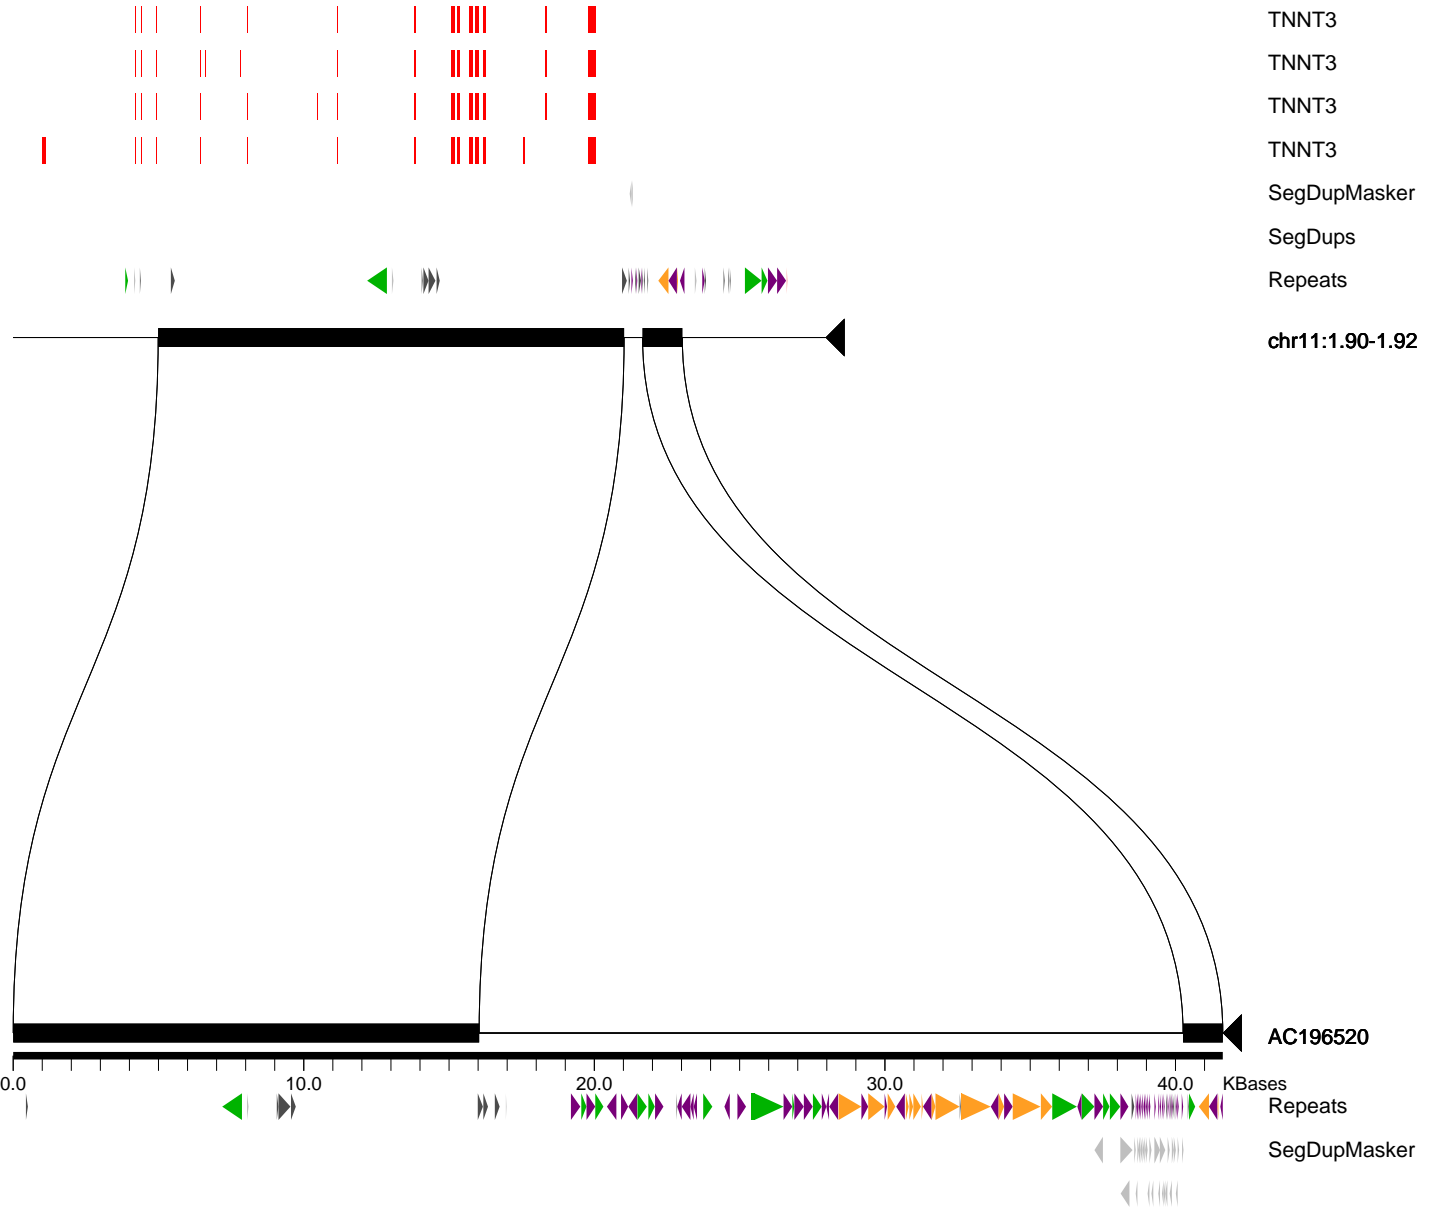

Clone: WIBR2-2018F13 Accession: AC196522

ESP Prediction: B Validation: D Mechanism: NHEJ

Other Simple Repeat Low Complexity DNA LTR LINE SINE

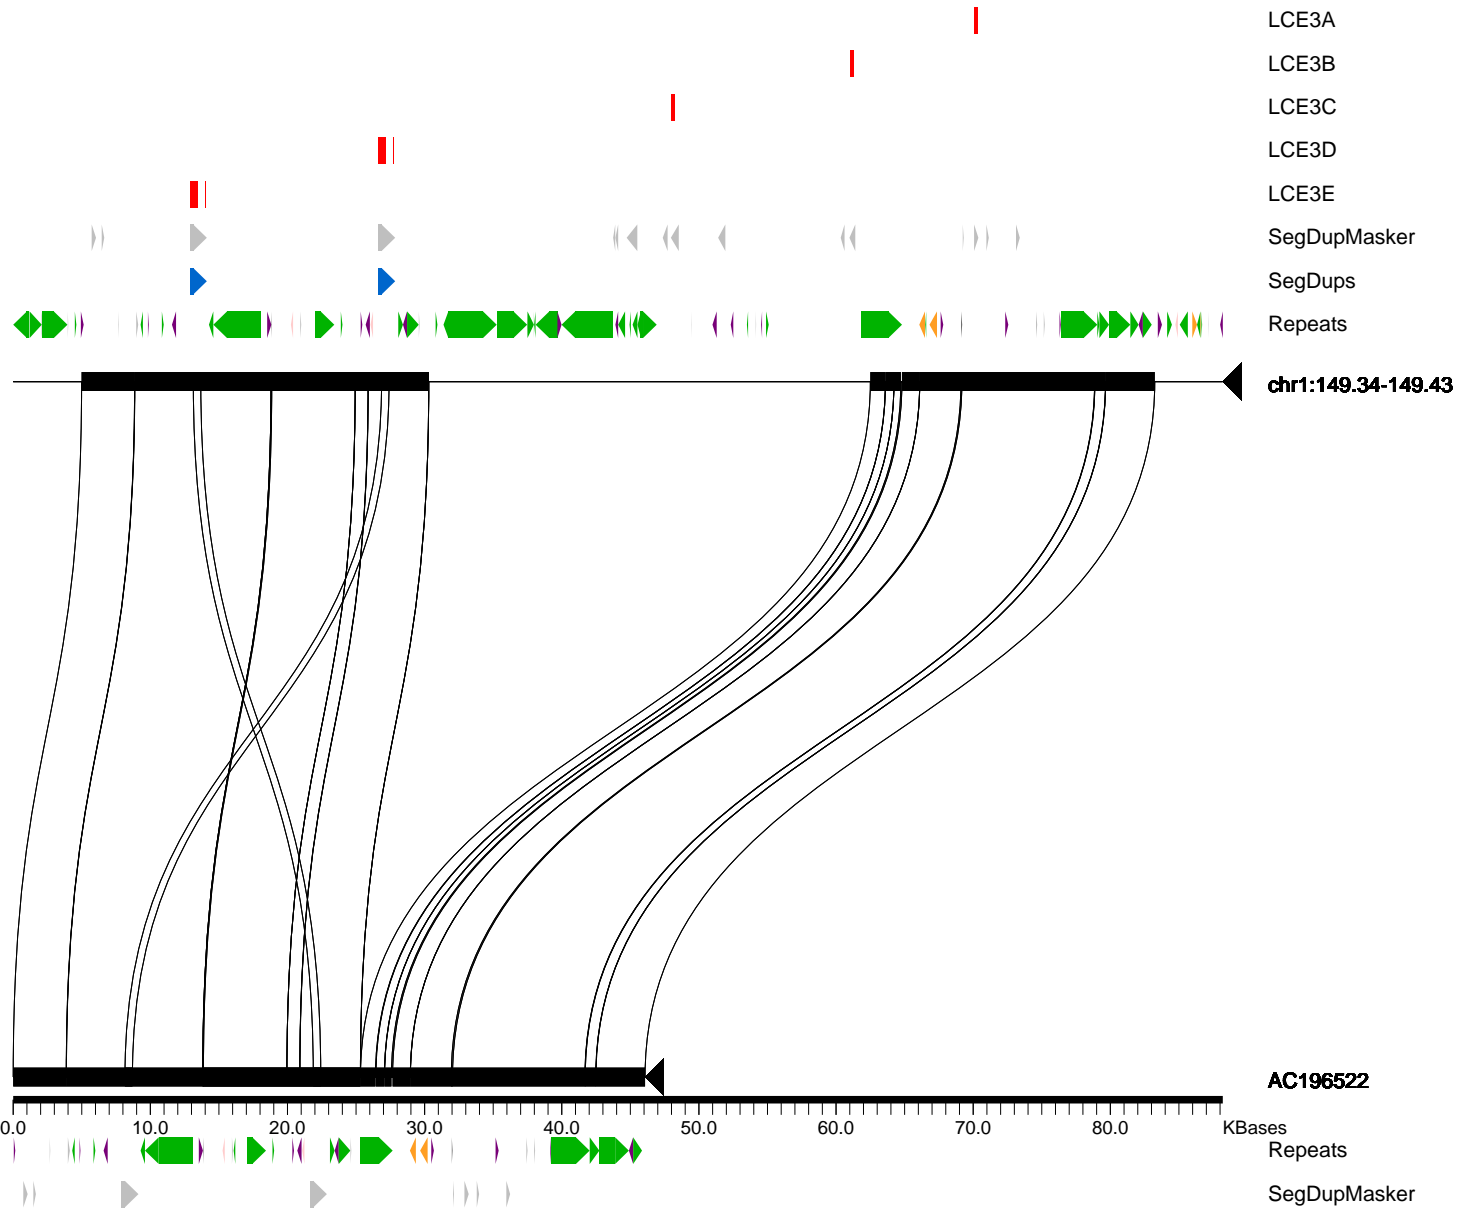

Clone: WIBR2-2022A20 Accession: AC196523

ESP Prediction: B Validation: D Mechanism: NHEJ (AS)

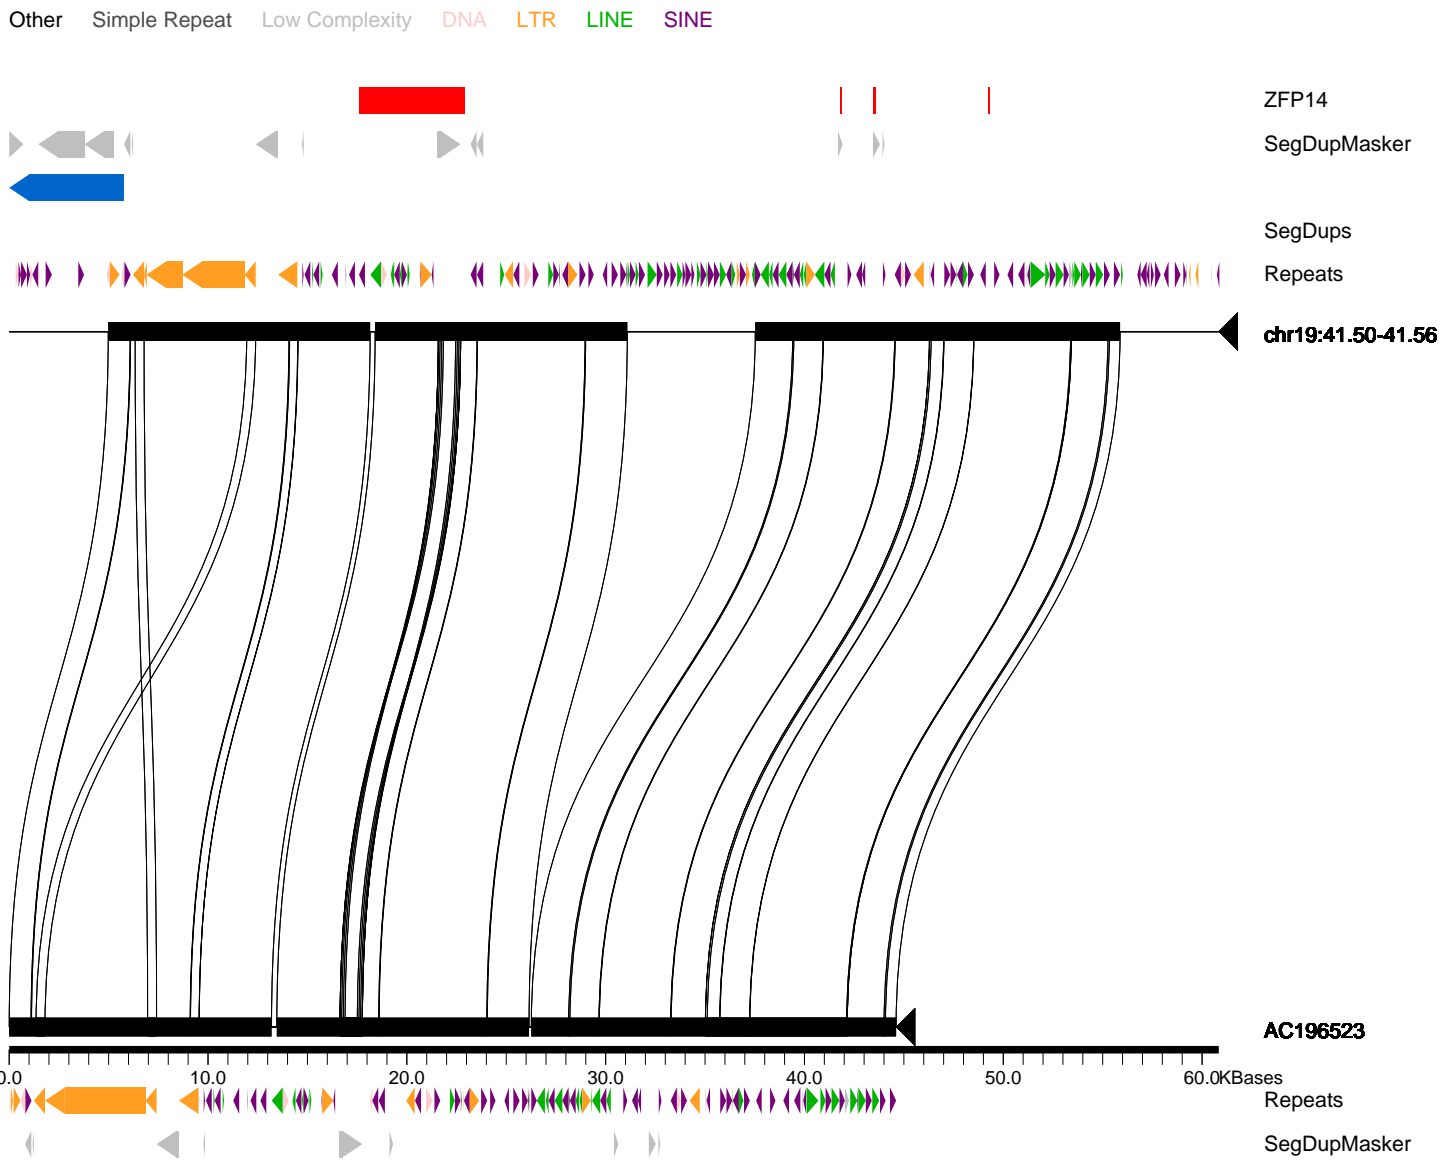

Clone: WIBR2-2049N20 Accession: AC193131

ESP Prediction: B Validation: D Mechanism: NHEJ

Other Simple Repeat Low Complexity DNA LTR LINE SINE

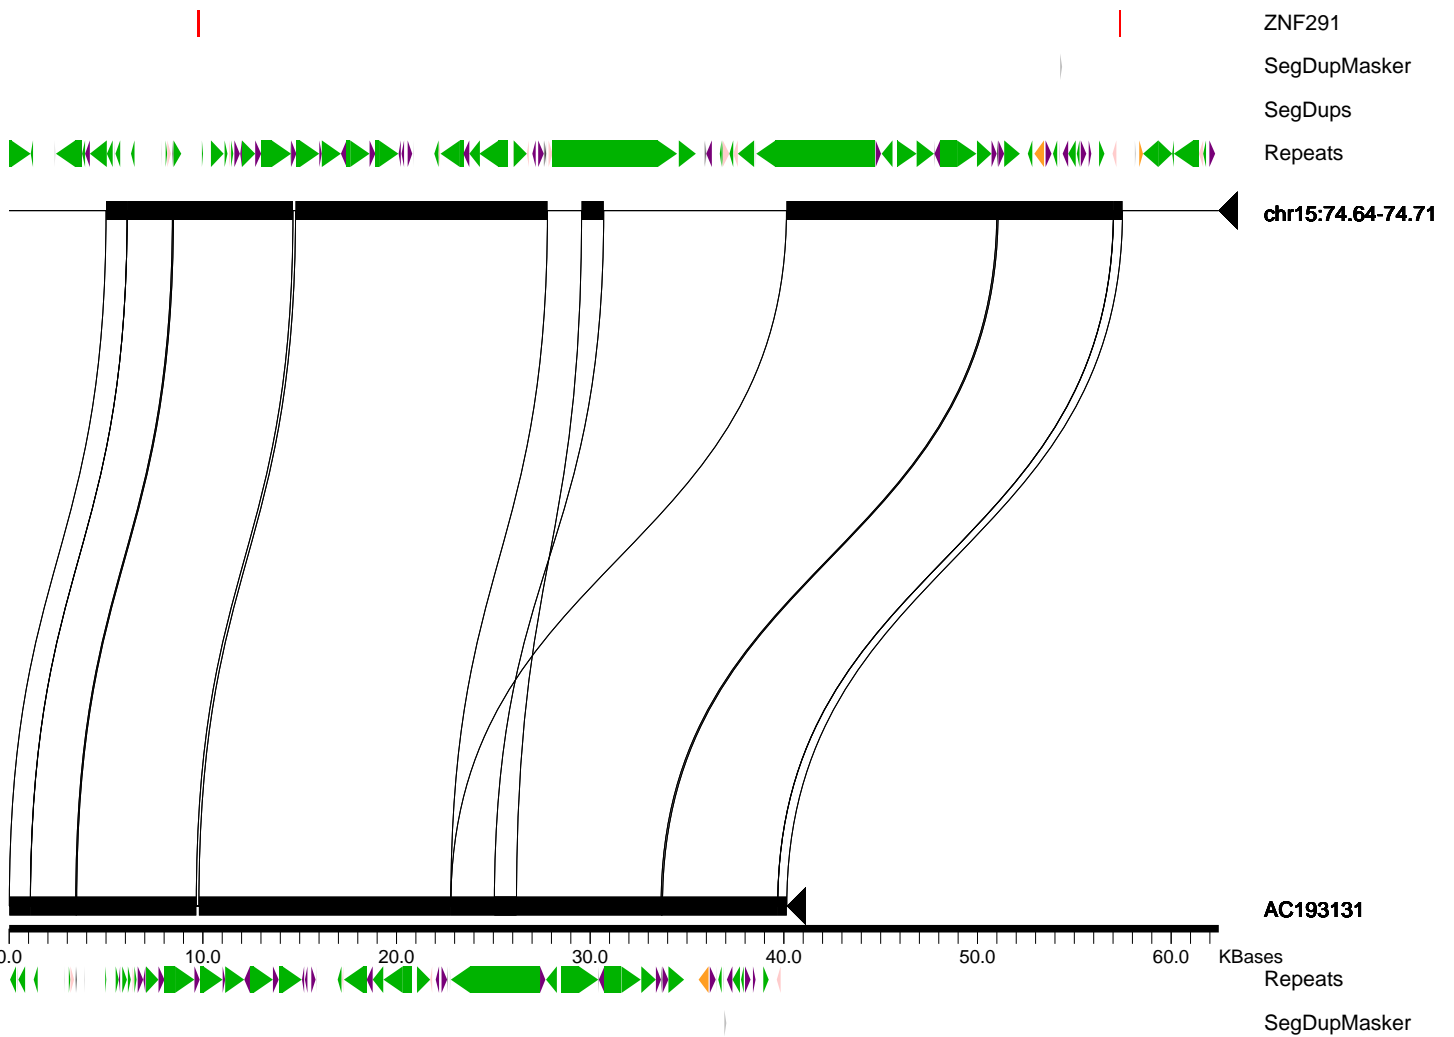

Clone: WIBR2-1787N17 Accession: AC193128

ESP Prediction: B Validation: D Mechanism: NHEJ

Other Simple Repeat Low Complexity DNA LTR LINE SINE

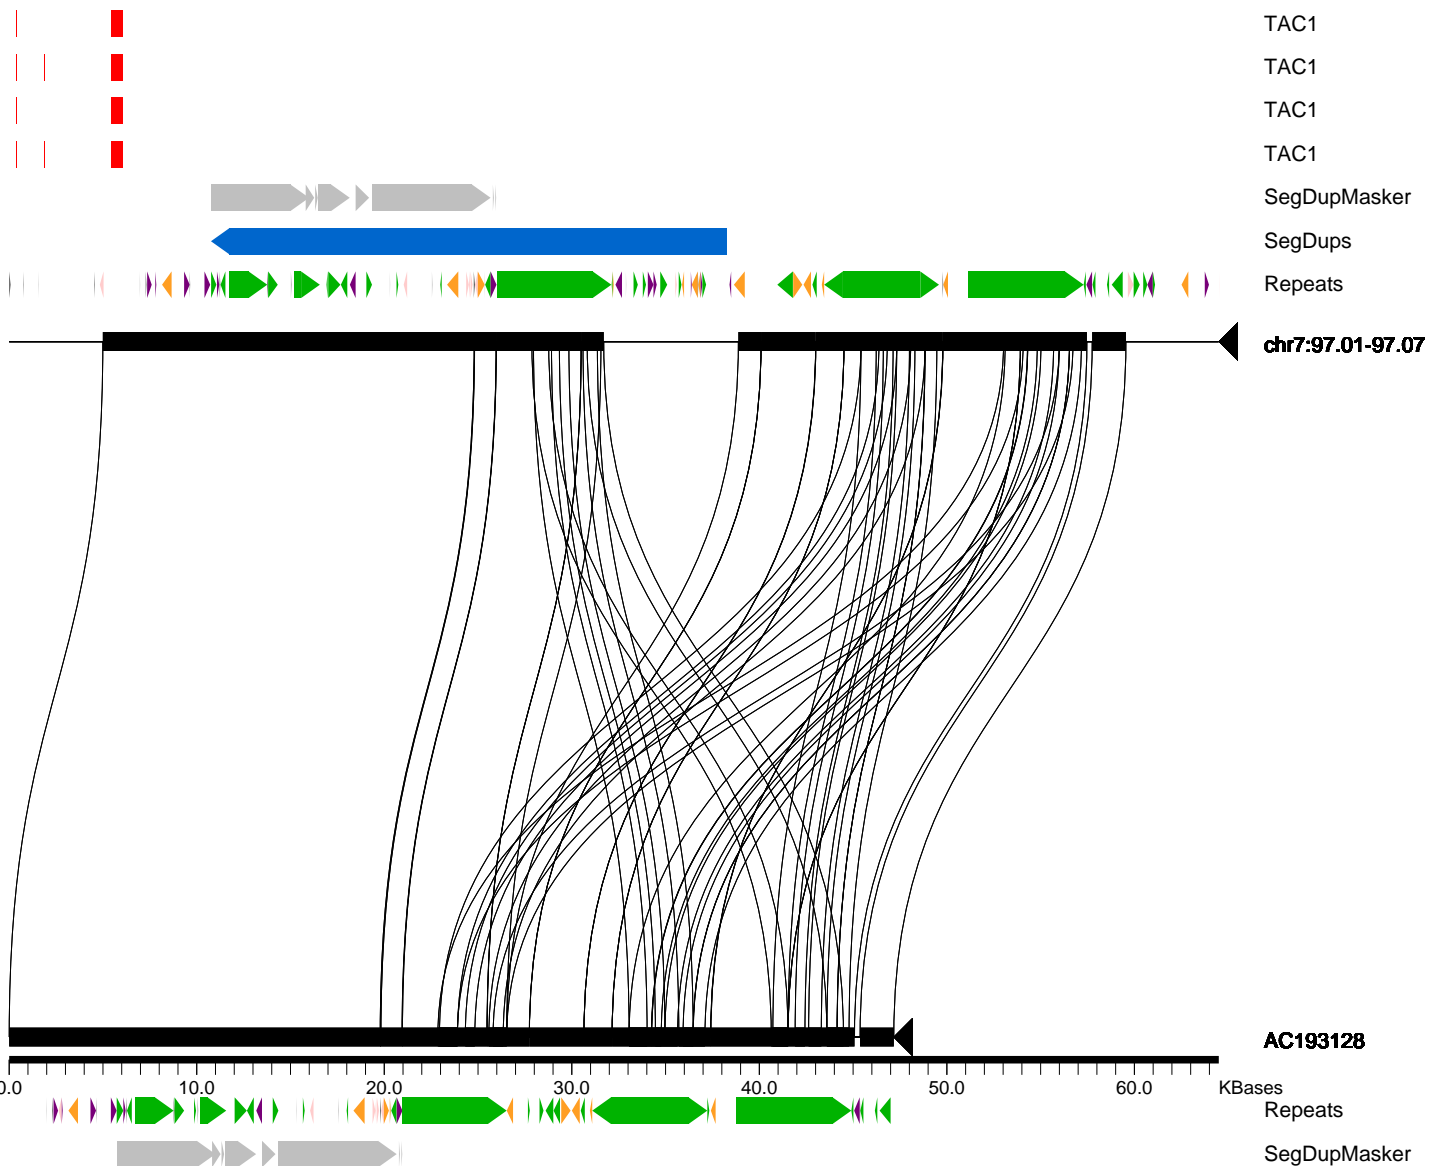

Clone: WIBR2-1732C23 Accession: AC153481

ESP Prediction: B Validation: D Mechanism: NHEJ (AS)

Other Simple Repeat Low Complexity DNA LTR LINE SINE

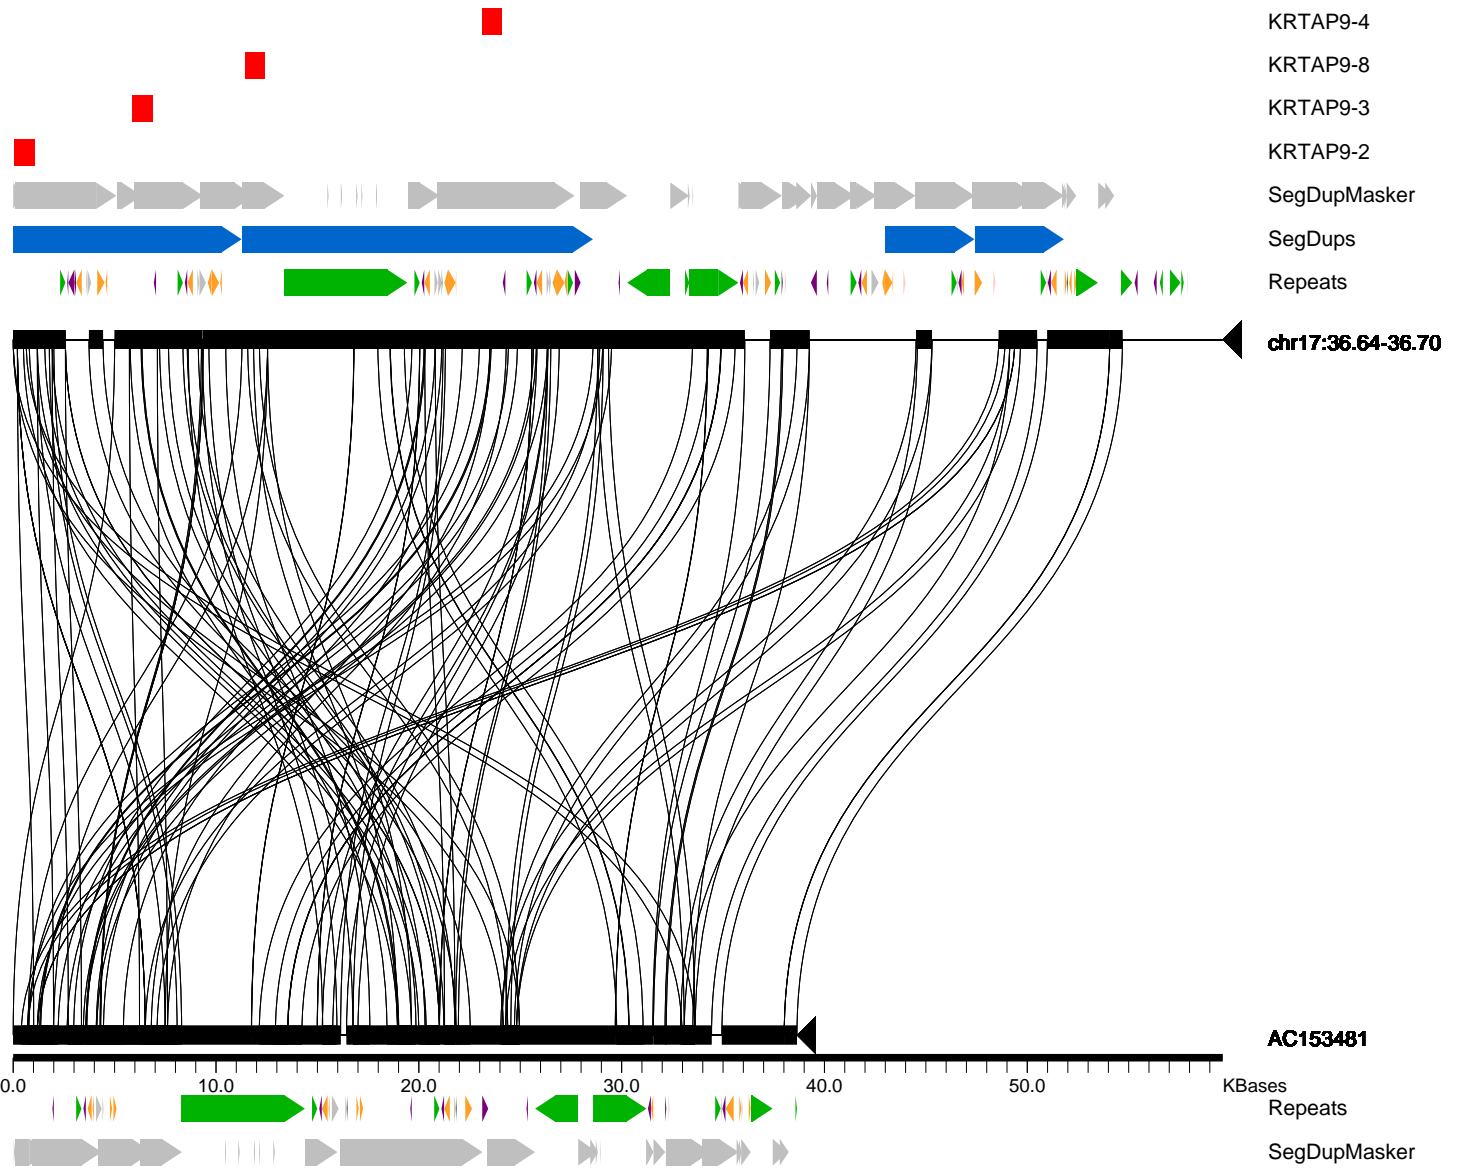

Clone: WIBR2-2264I19 Accession: AC196529

ESP Prediction: B Validation: D Mechanism: NHEJ

Other Simple Repeat Low Complexity DNA LTR LINE SINE

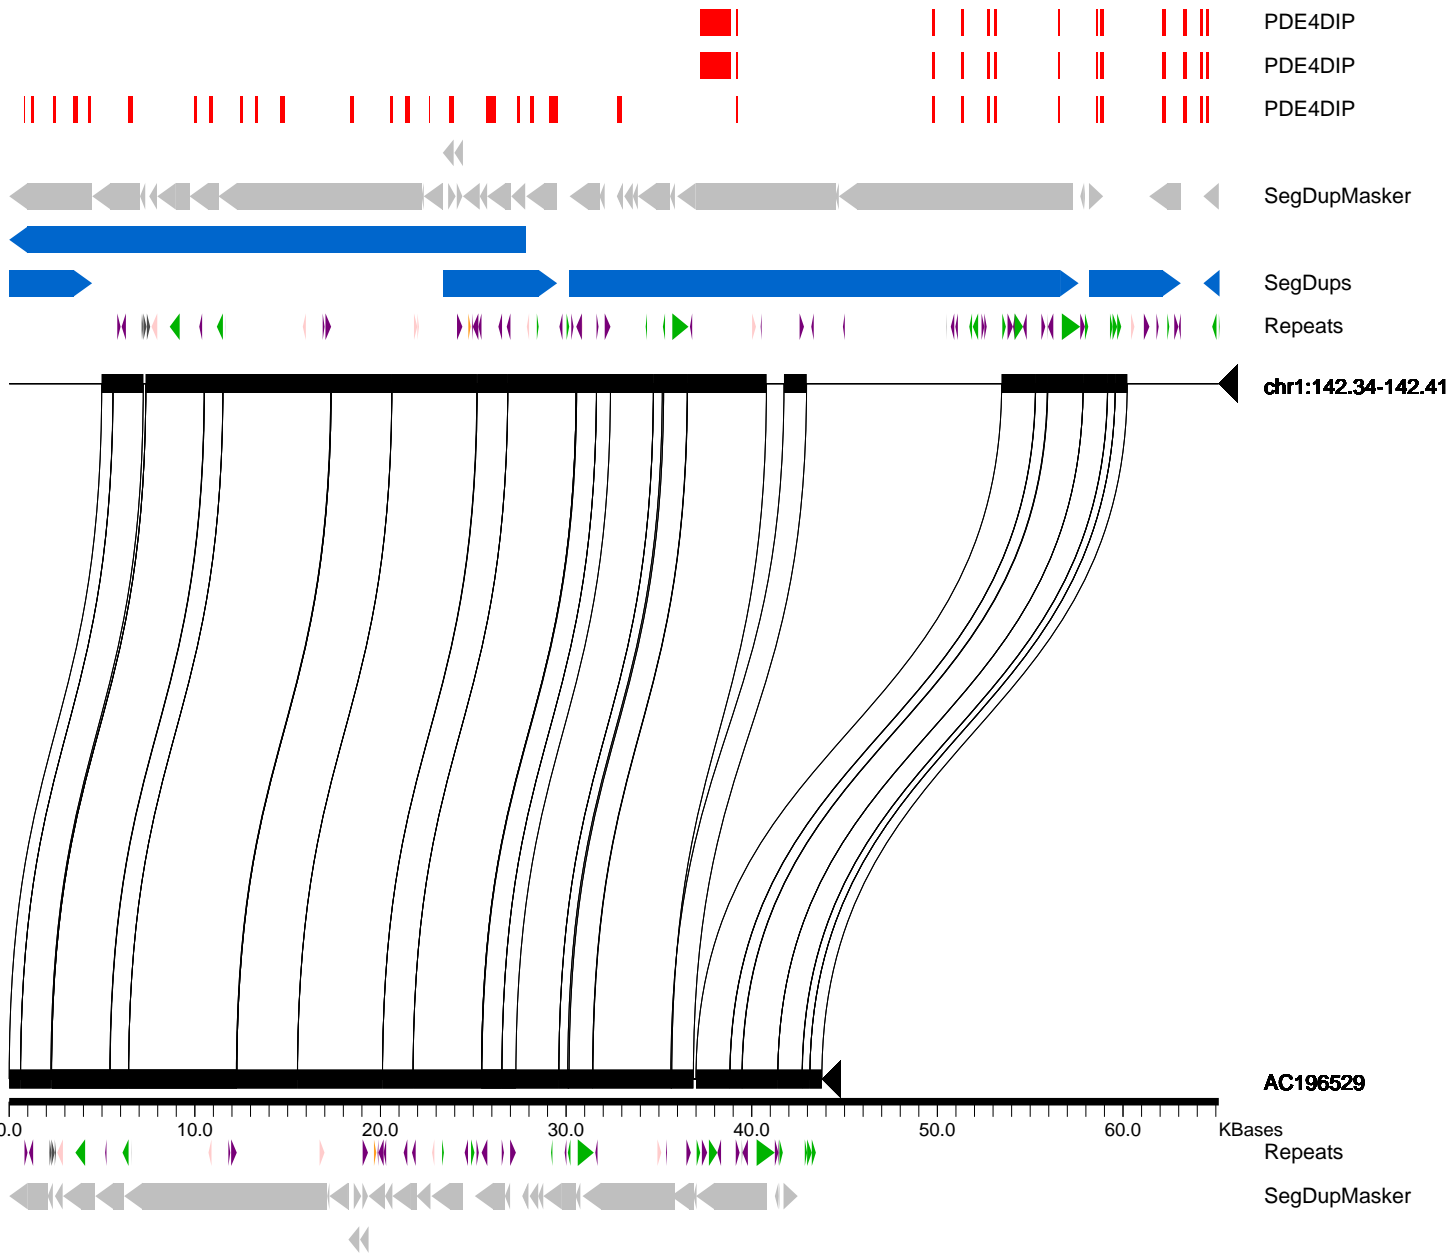

Clone: WIBR2-2853E03 Accession: AC171397

ESP Prediction: B Validation: D Mechanism: NHEJ

Other Simple Repeat Low Complexity DNA LTR LINE SINE

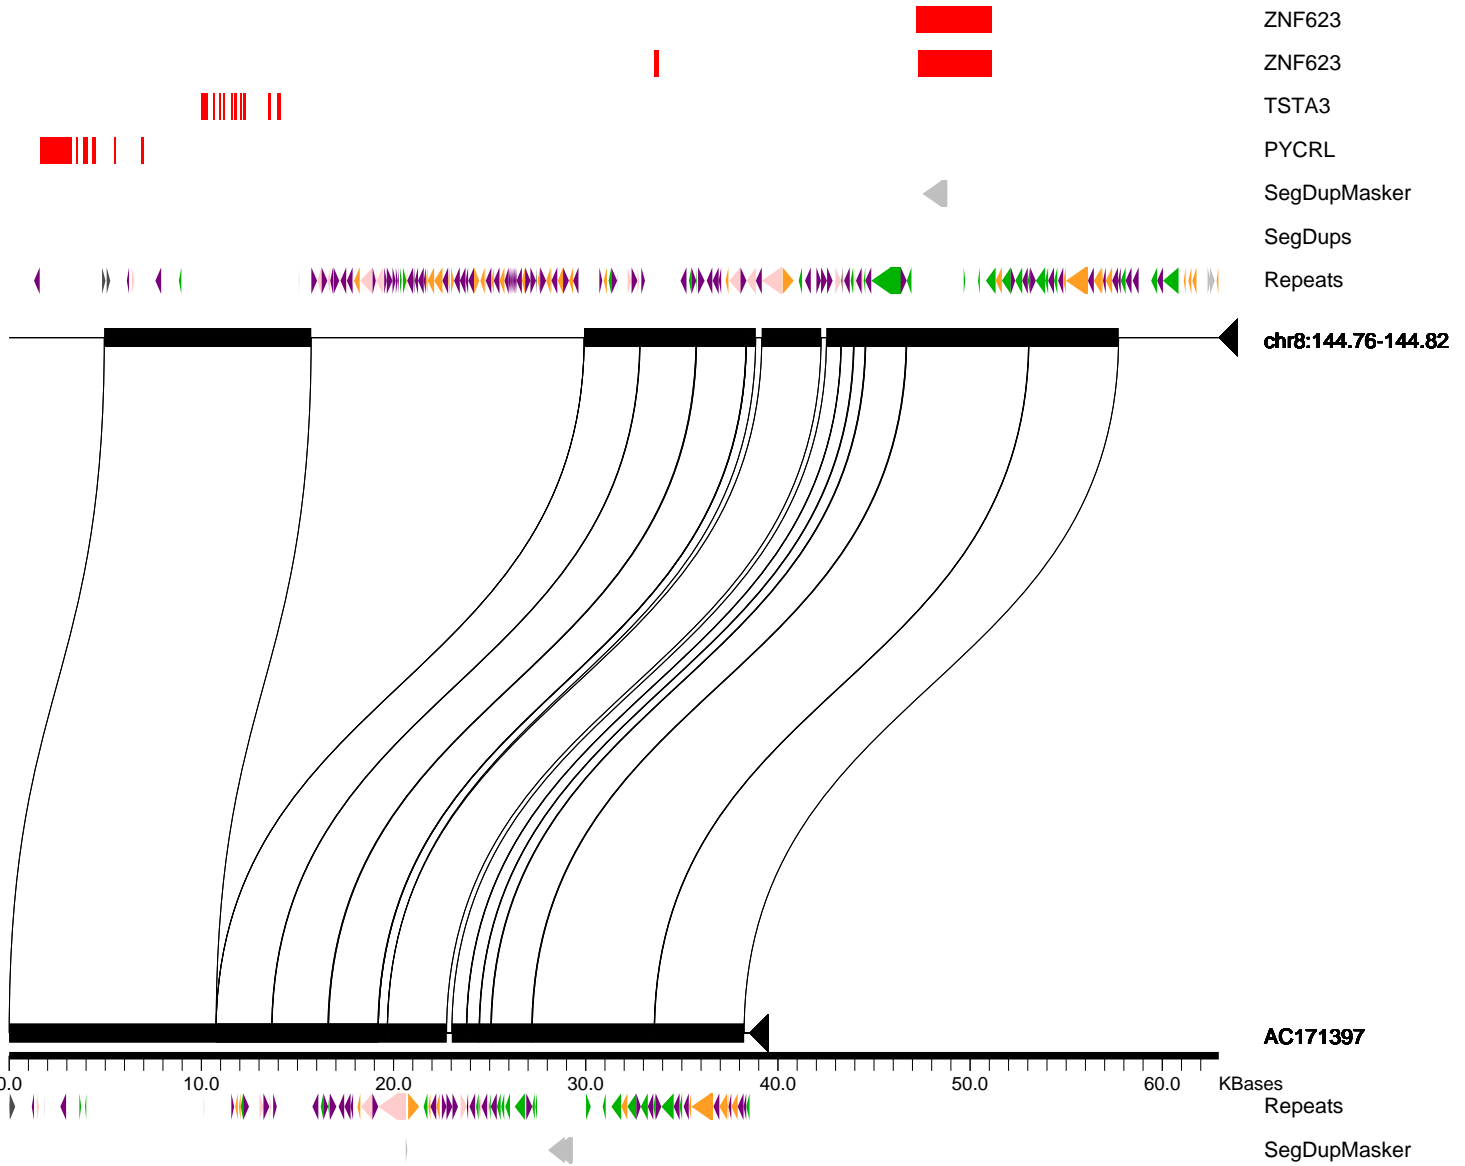



Clone: WIBR2-2840F04 Accession: AC153473

ESP Prediction: B Validation: D Mechanism: NHEJ

Other Simple Repeat Low Complexity DNA LTR LINE SINE

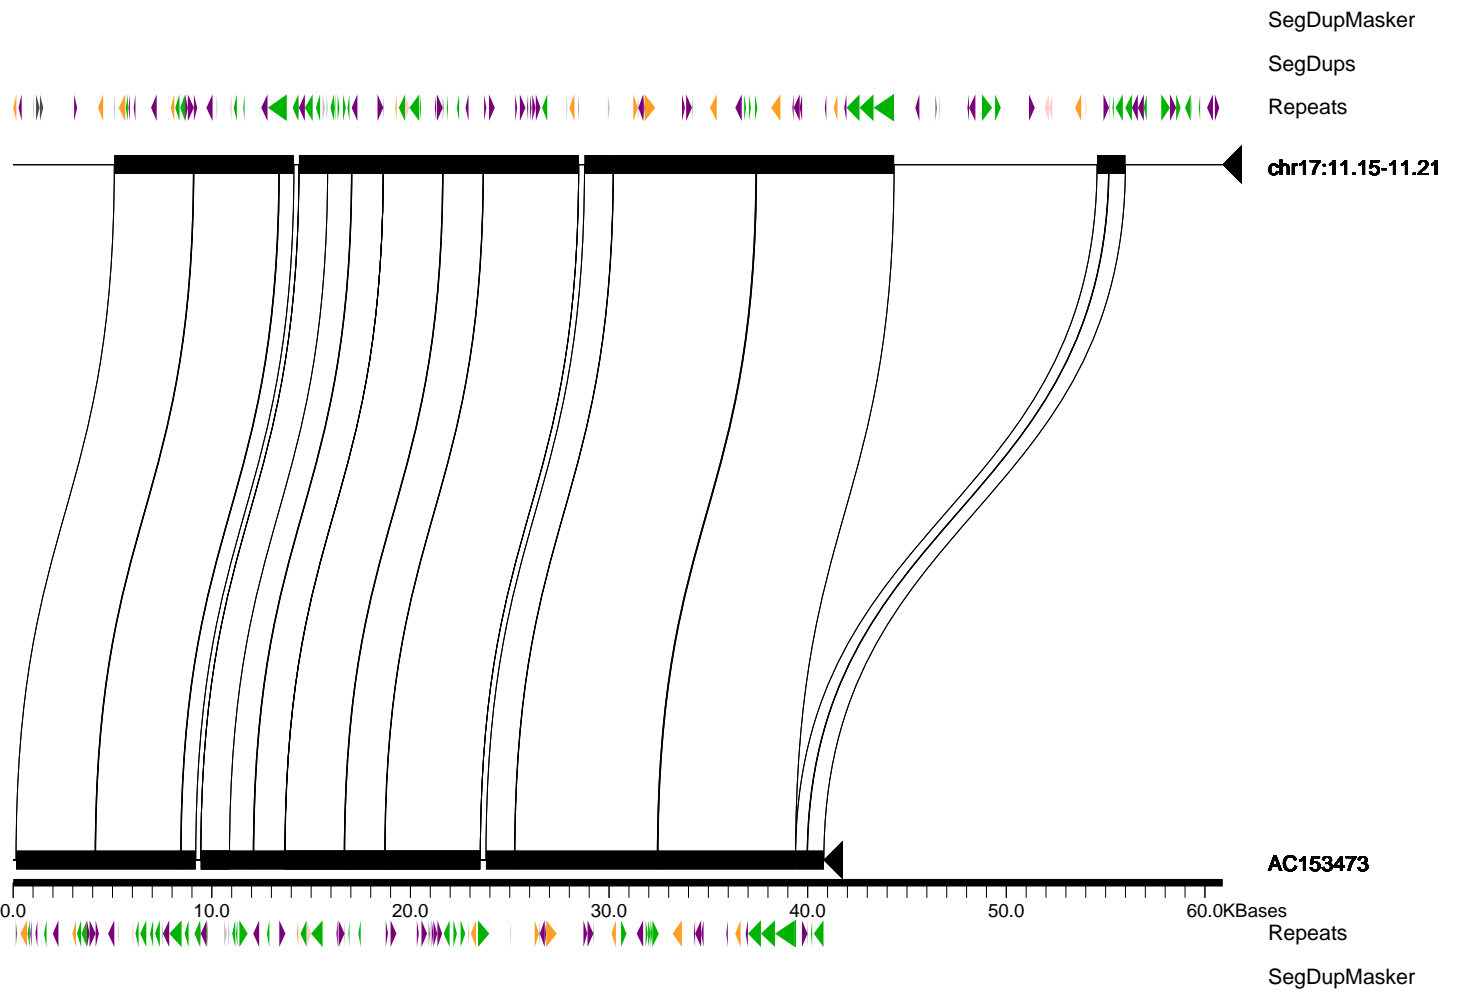

Clone: WIBR2-2797B18 Accession: AC195764

ESP Prediction: B Validation: D Mechanism: NHEJ

Other Simple Repeat Low Complexity DNA LTR LINE SINE

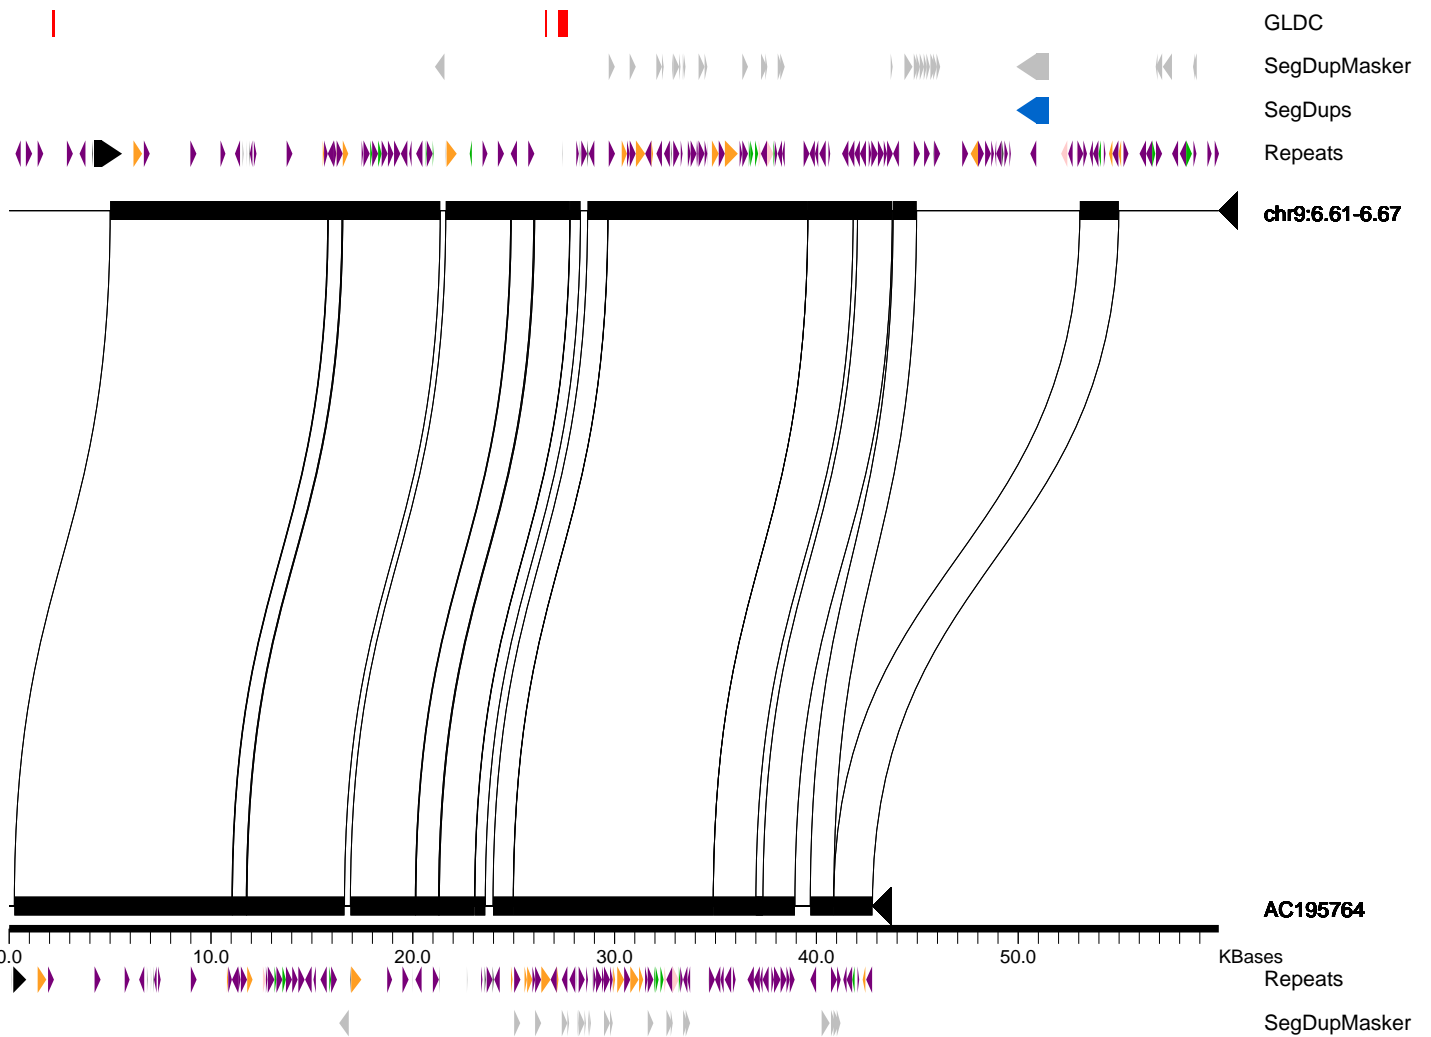

Clone: WIBR2-2652E07 Accession: AC193150

ESP Prediction: S Validation: I Mechanism: NHEJ (AS)

Other Simple Repeat Low Complexity DNA LTR LINE SINE

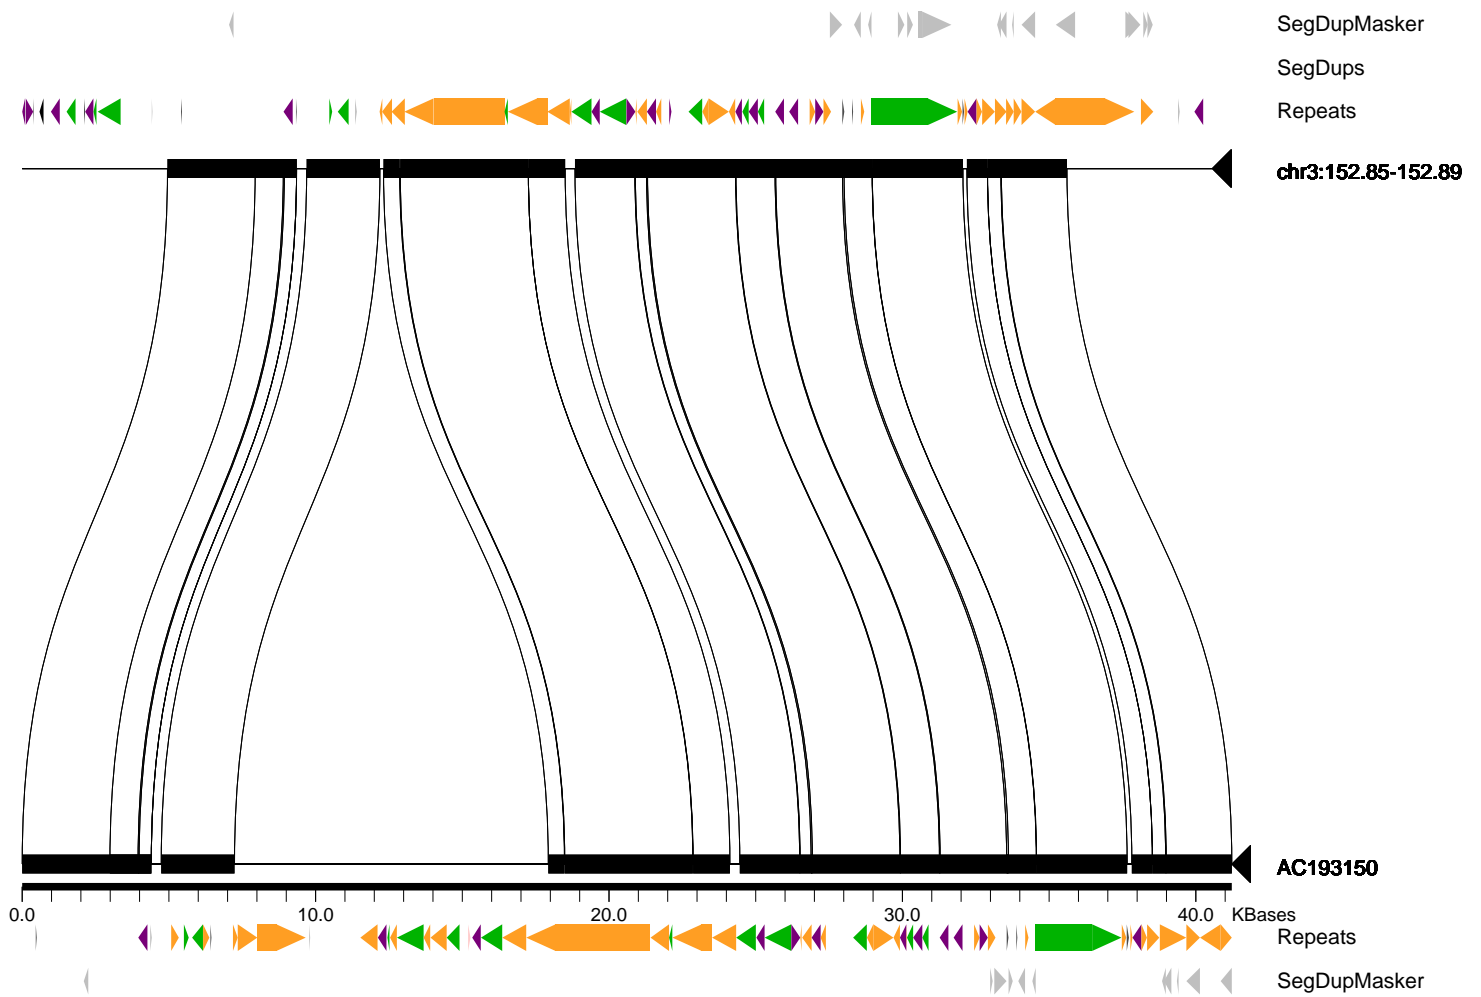

Clone: WIBR2-2953G23 Accession: AC193158

ESP Prediction: B Validation: D Mechanism: NHEJ

Other Simple Repeat Low Complexity DNA LTR LINE SINE

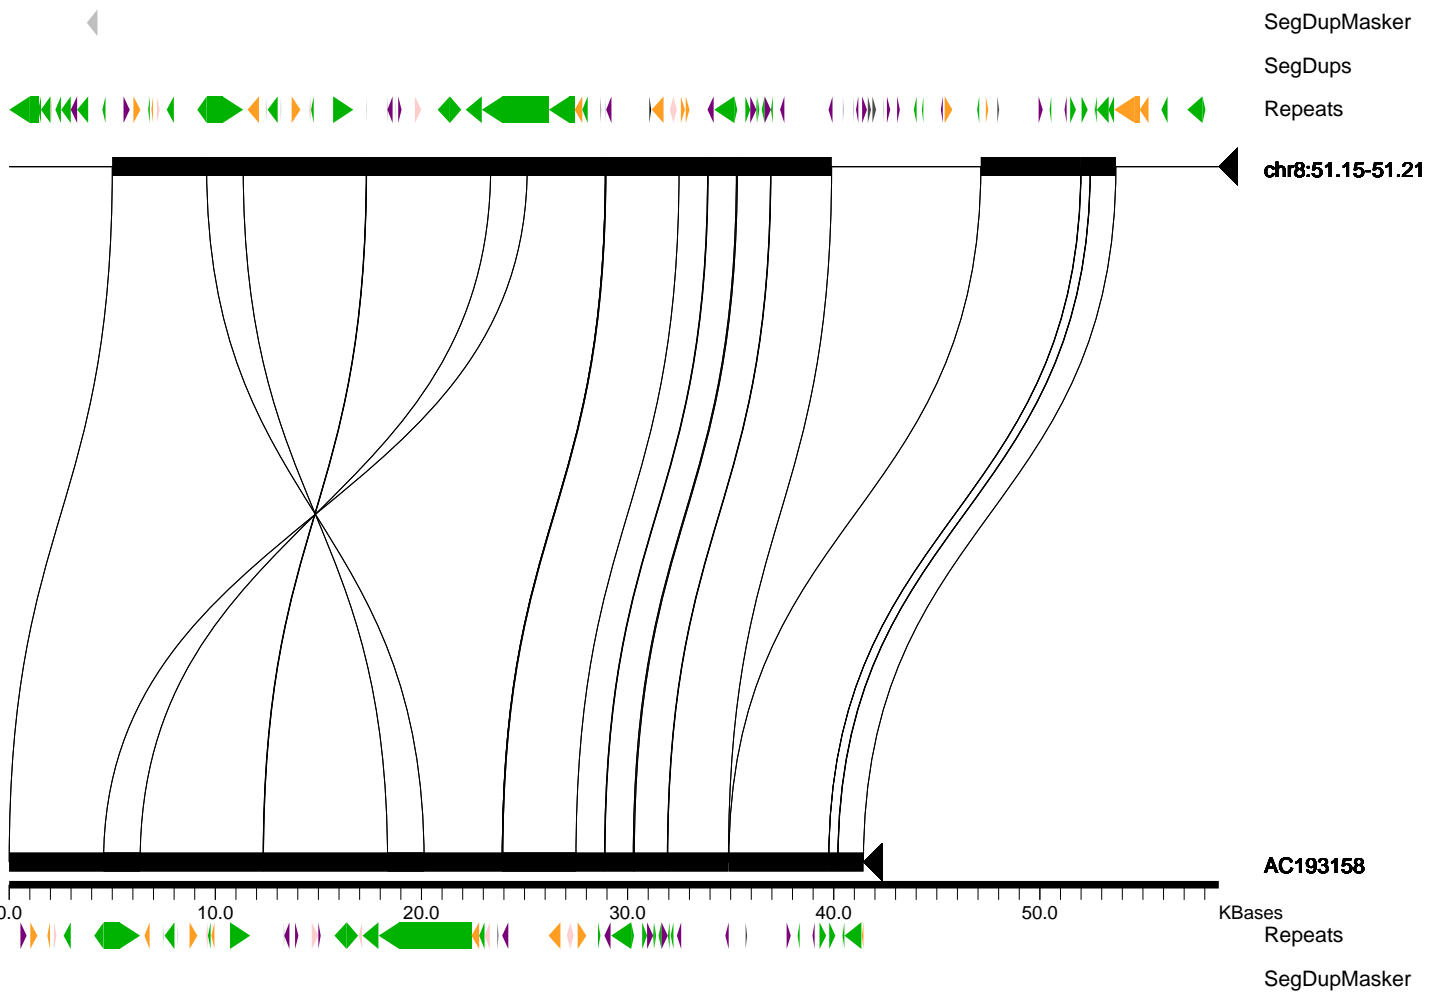

Clone: WIBR2-2902D21 Accession: AC196540

ESP Prediction: S Validation: I Mechanism: NHEJ (AS)

Other Simple Repeat Low Complexity DNA LTR LINE SINE

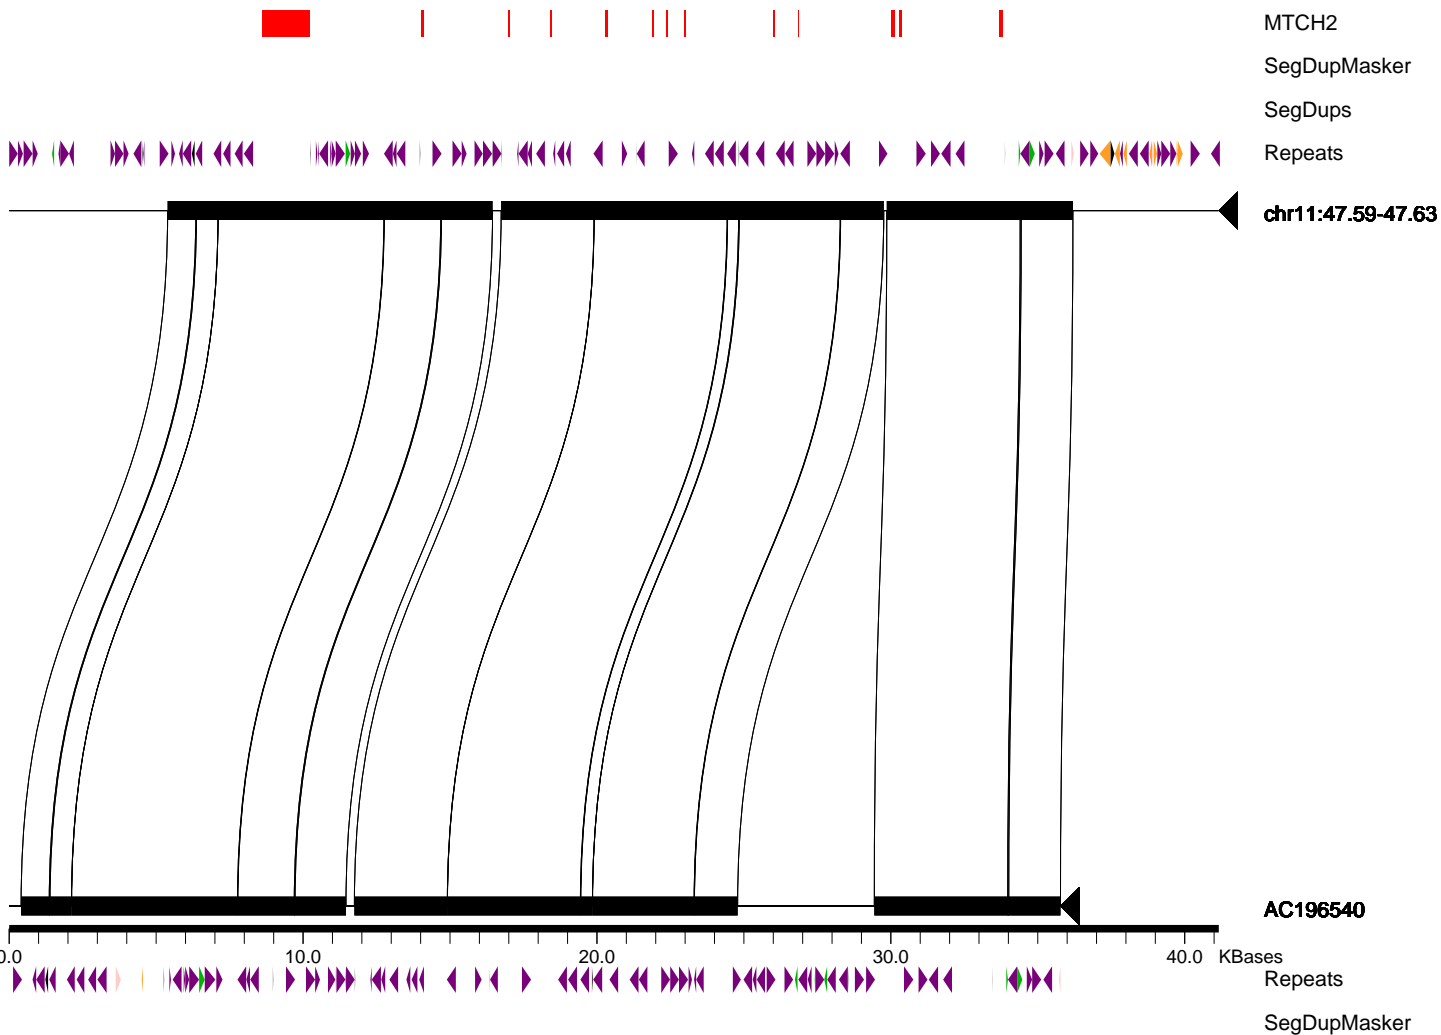

Clone: WIBR2-3051A23 Accession: AC158326

ESP Prediction: S Validation: I Mechanism: NHEJ (AS)

Other Simple Repeat Low Complexity DNA LTR LINE SINE

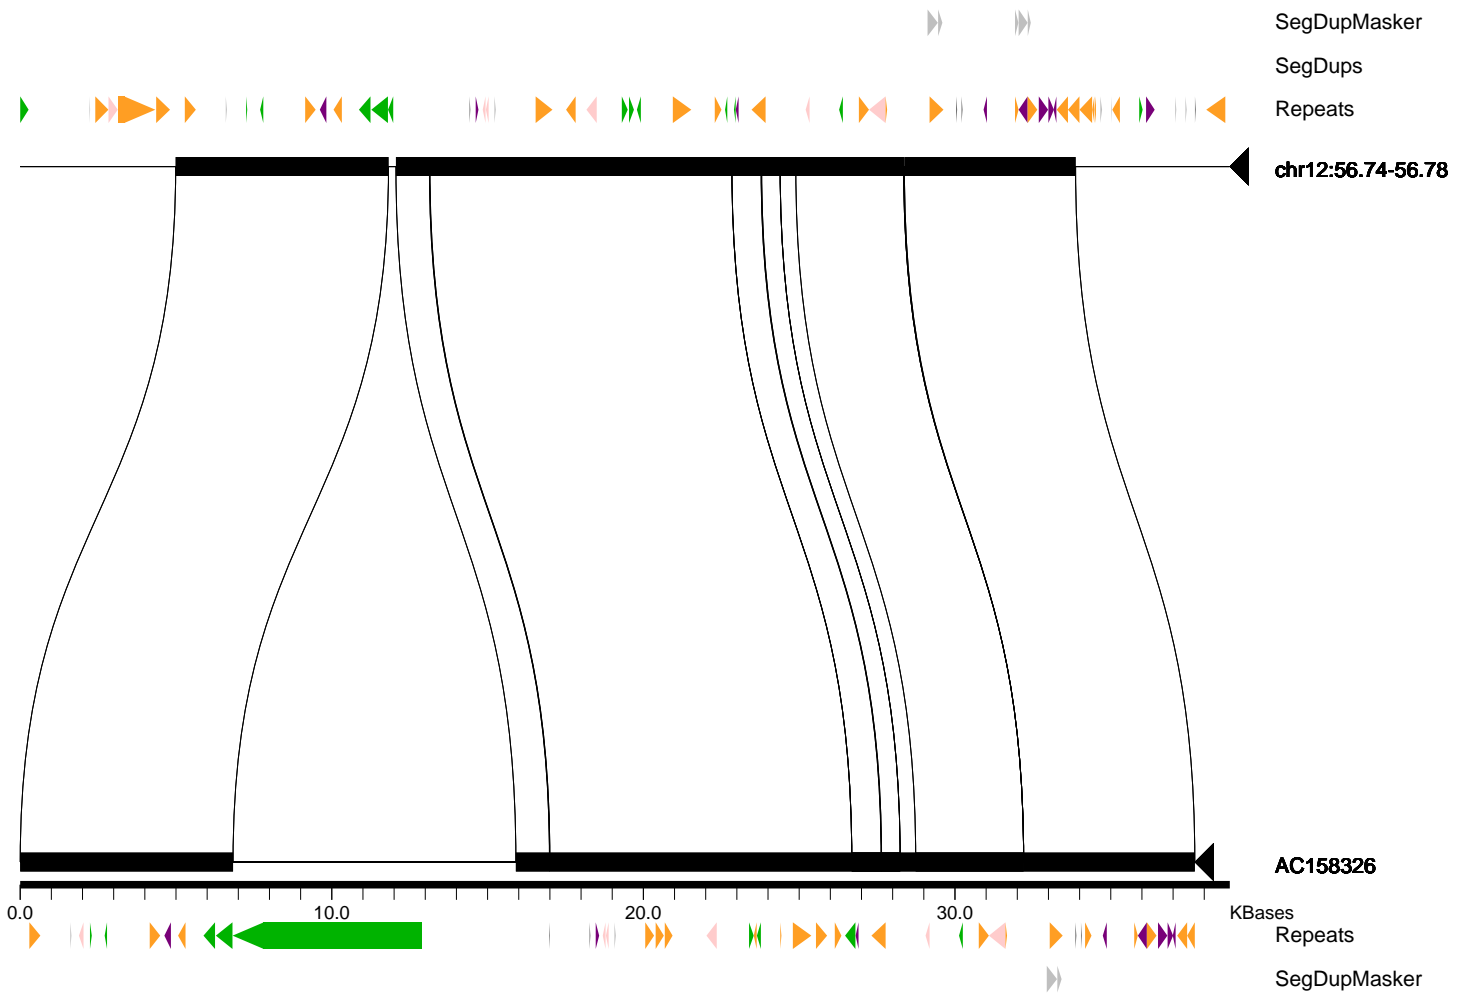

Clone: WIBR2-3075L14 Accession: AC153474

ESP Prediction: B Validation: D Mechanism: NHEJ

Other Simple Repeat Low Complexity DNA LTR LINE SINE

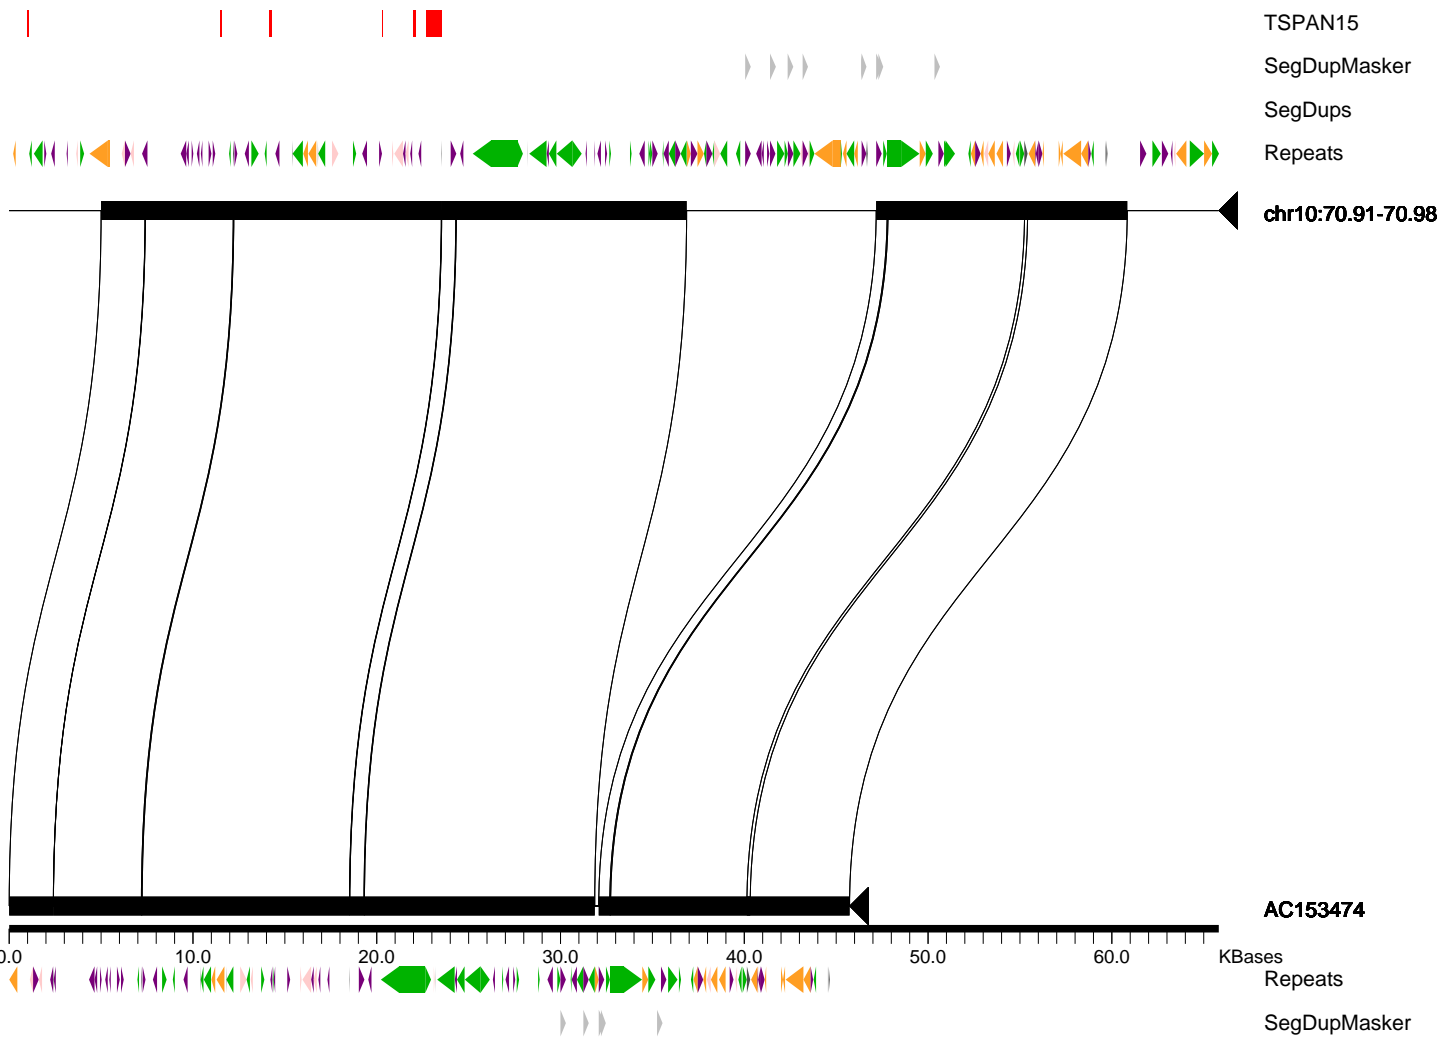

Clone: WIBR2-3301M07 Accession: AC158330

ESP Prediction: B Validation: D Mechanism: NHEJ

Other Simple Repeat Low Complexity DNA LTR LINE SINE

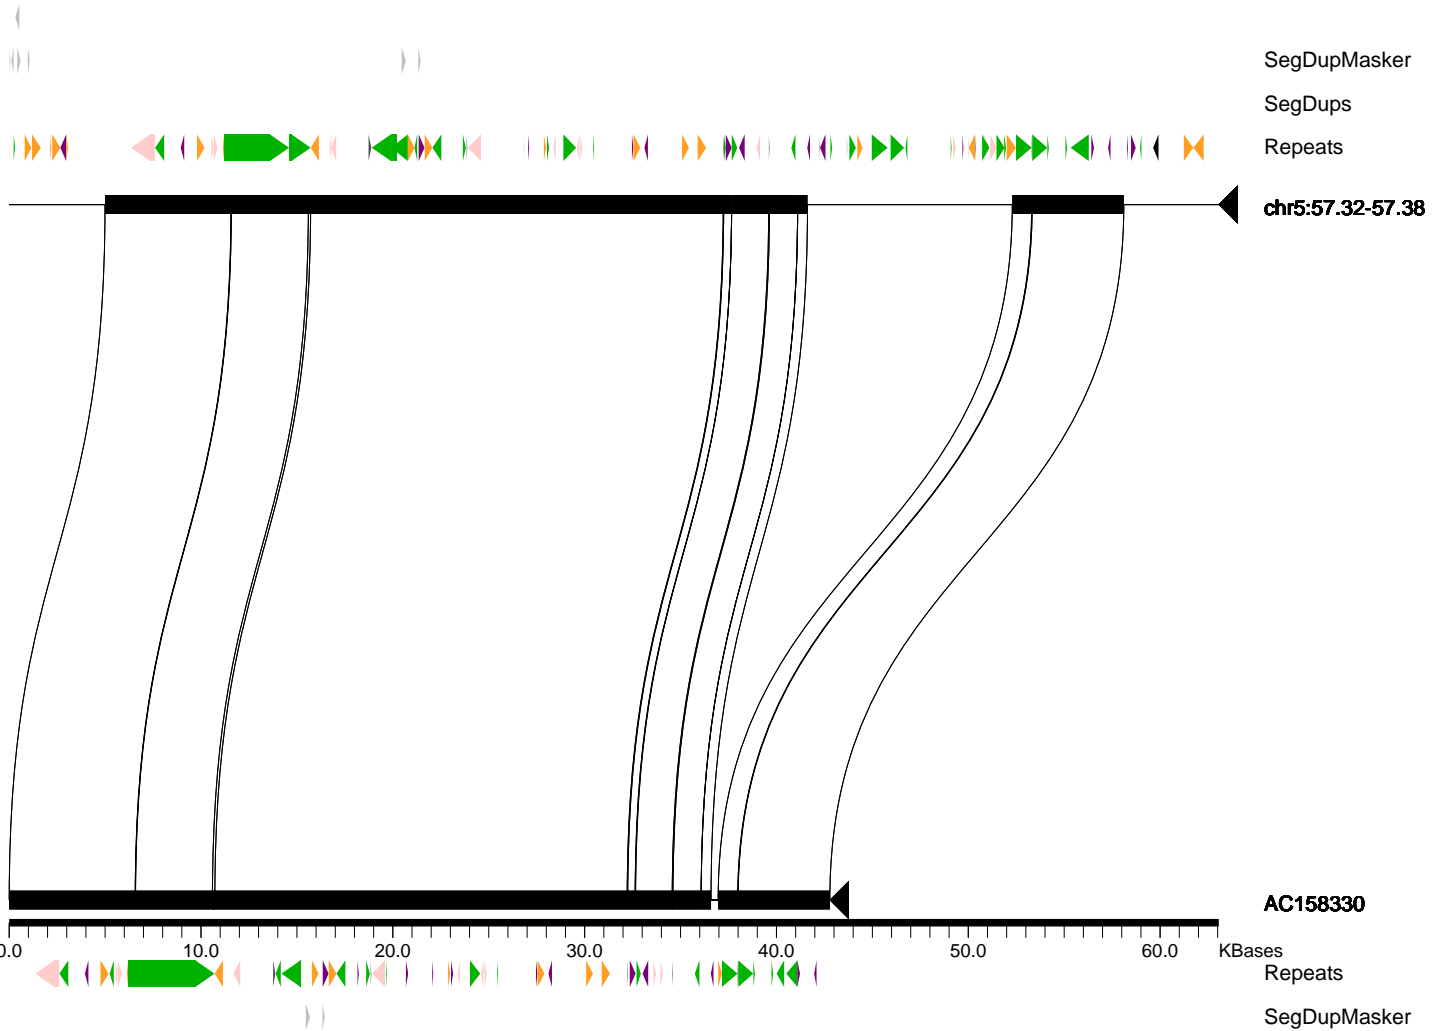



Clone: ABC9\_43835400\_B17 Accession: AC206597

ESP Prediction: S Validation: I Mechanism: RETRO

Other Simple Repeat Low Complexity DNA LTR LINE SINE

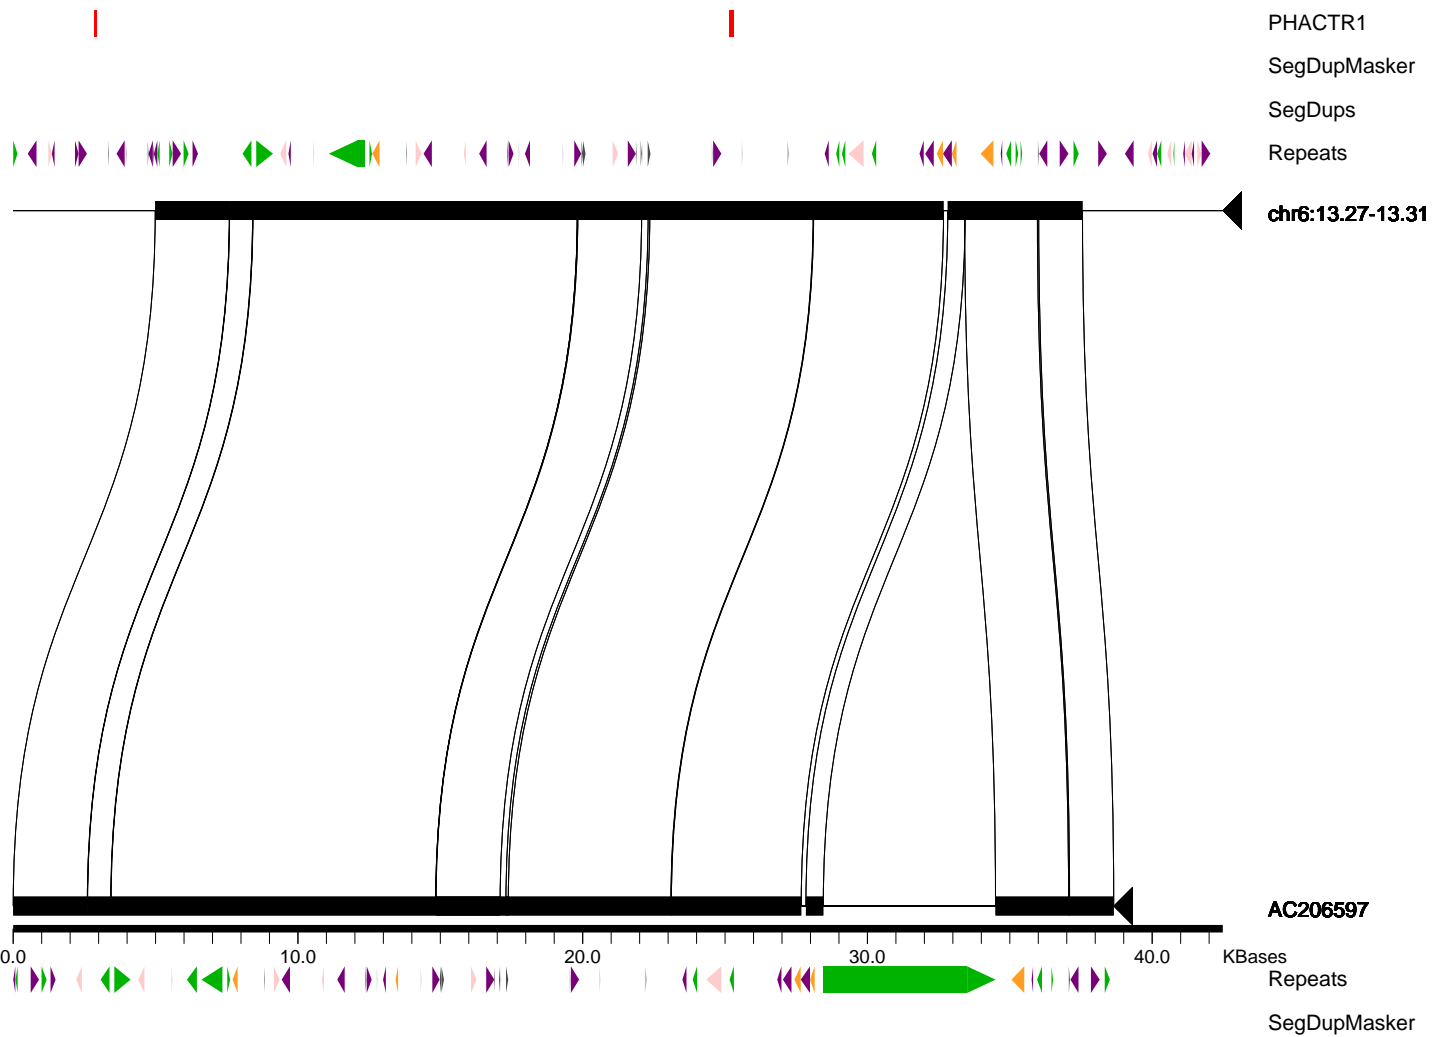

Clone: ABC10\_45498000\_N8 Accession: AC203594

ESP Prediction: S Validation: I Mechanism: RETRO

Other Simple Repeat Low Complexity DNA LTR LINE SINE

SegDupMasker

SegDups

Repeats

chr16:78.39-78.44

AC203594

Repeats

SegDupMasker

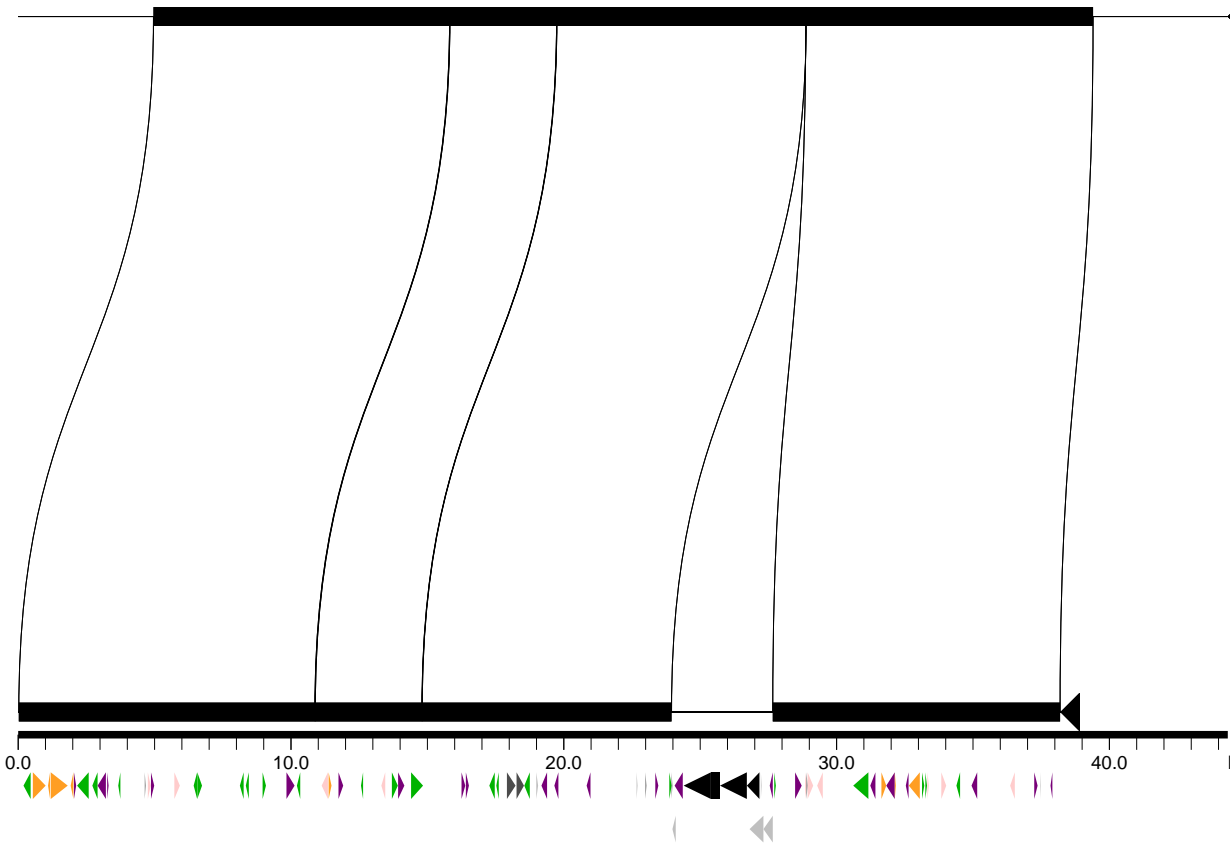

Clone: ABC10\_45501700\_B20 Accession: AC203593

ESP Prediction: S Validation: I Mechanism: RETRO

Other Simple Repeat Low Complexity DNA LTR LINE SINE

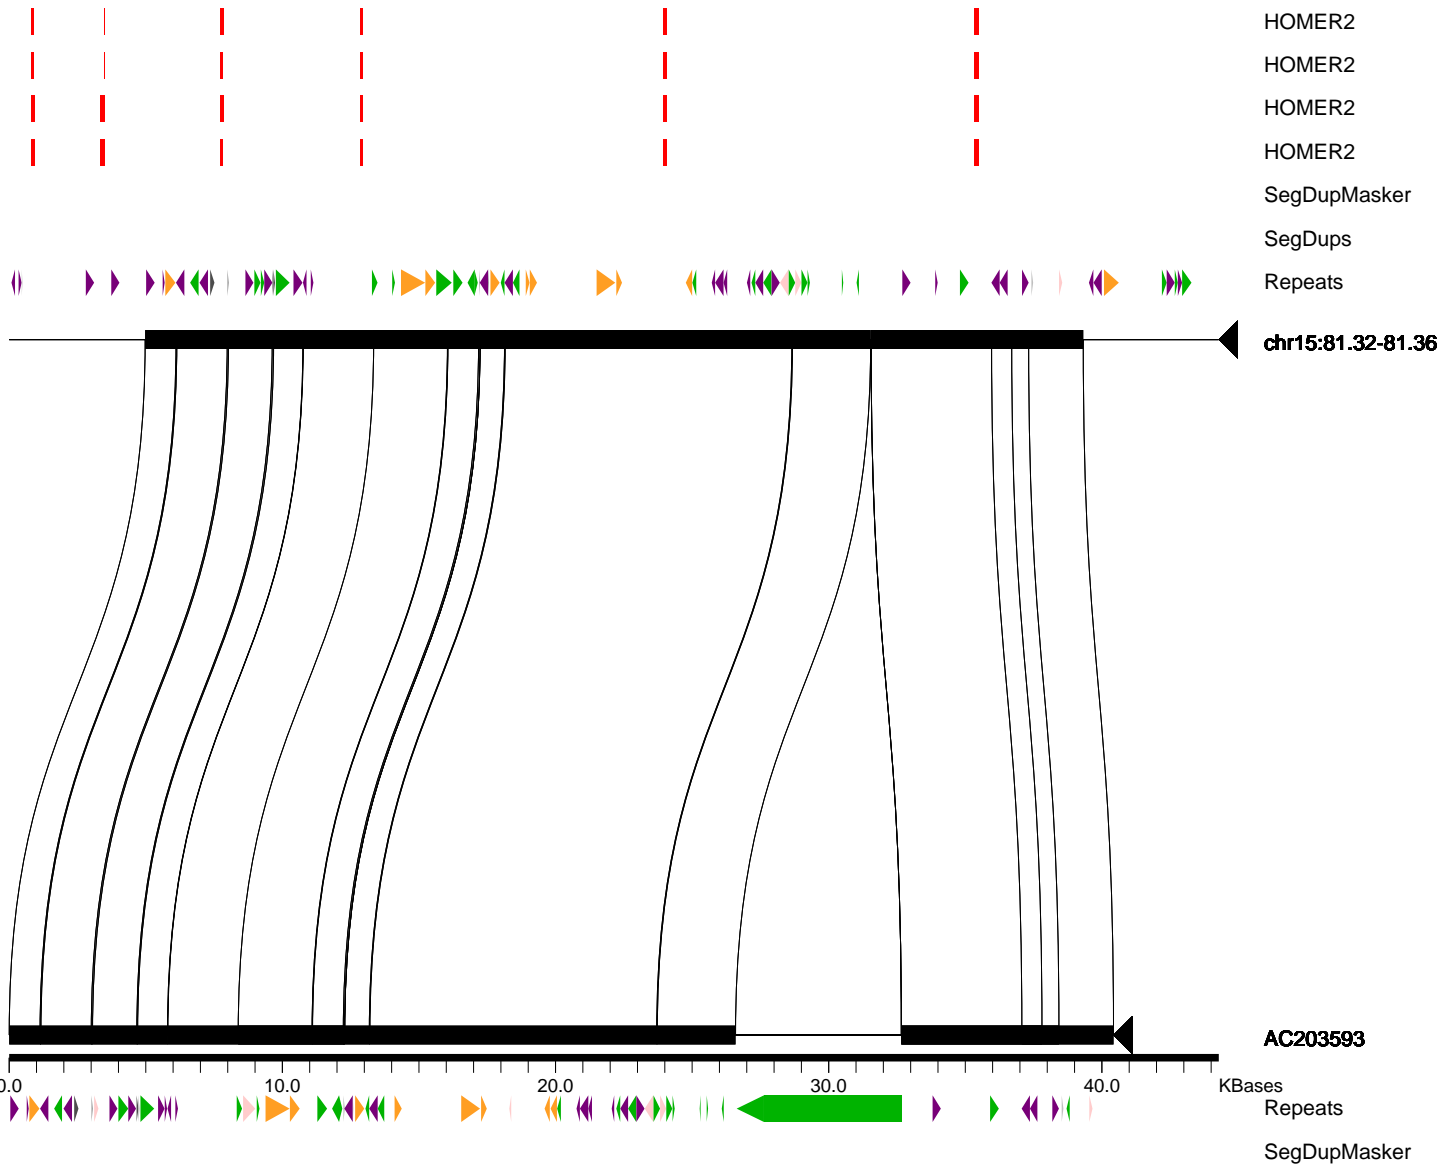

Clone: ABC10\_45503500\_I7 Accession: AC203587  
ESP Prediction: S Validation: I Mechanism: RETRO

Other Simple Repeat Low Complexity DNA LTR LINE SINE

SegDupMasker

SegDups

Repeats

chr14:85.99-86.03

AC203587

KBases

Repeats

SegDupMasker

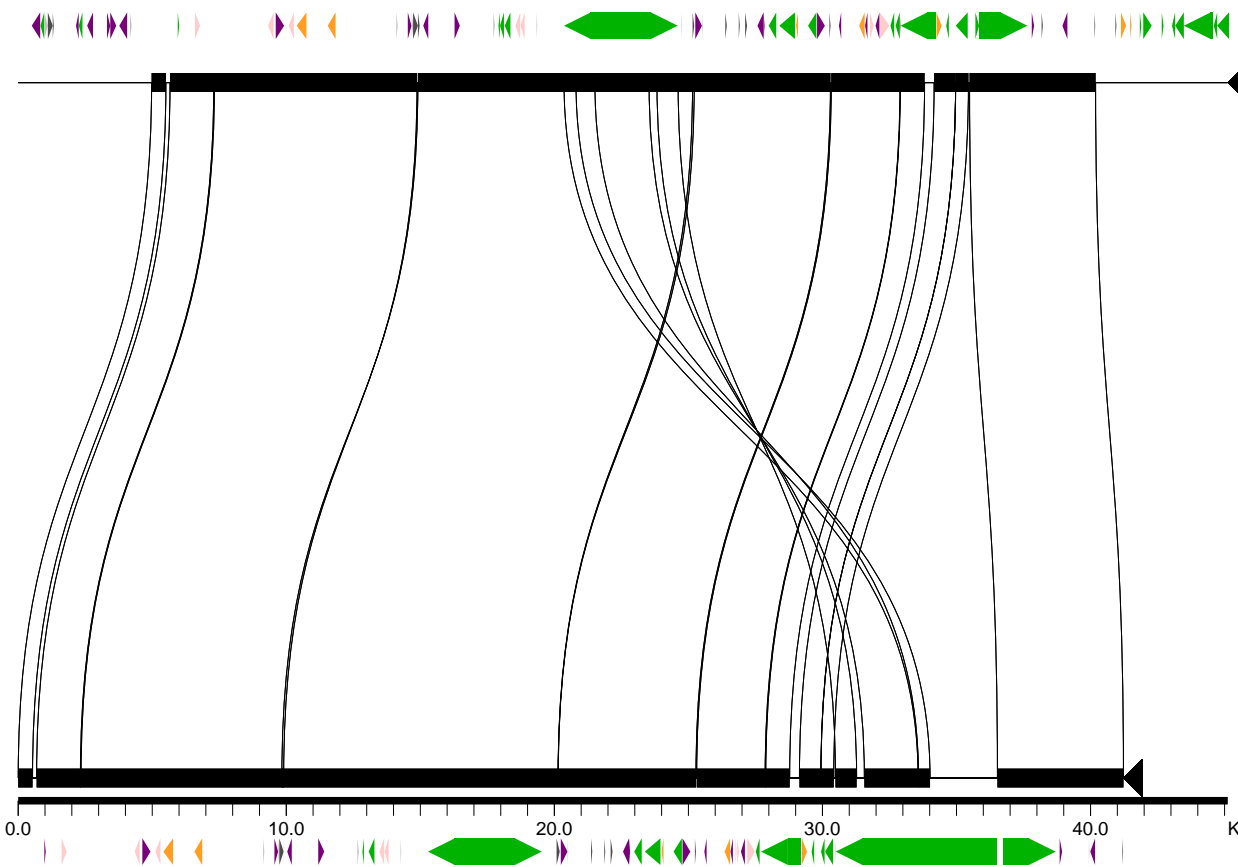

Clone: ABC10\_45521700\_B16 Accession: AC203650

ESP Prediction: S Validation: I Mechanism: RETRO

Other Simple Repeat Low Complexity DNA LTR LINE SINE

SegDupMasker

SegDups

Repeats

chr12:125.29-125.34

AC203650

KBases  
Repeats

SegDupMasker

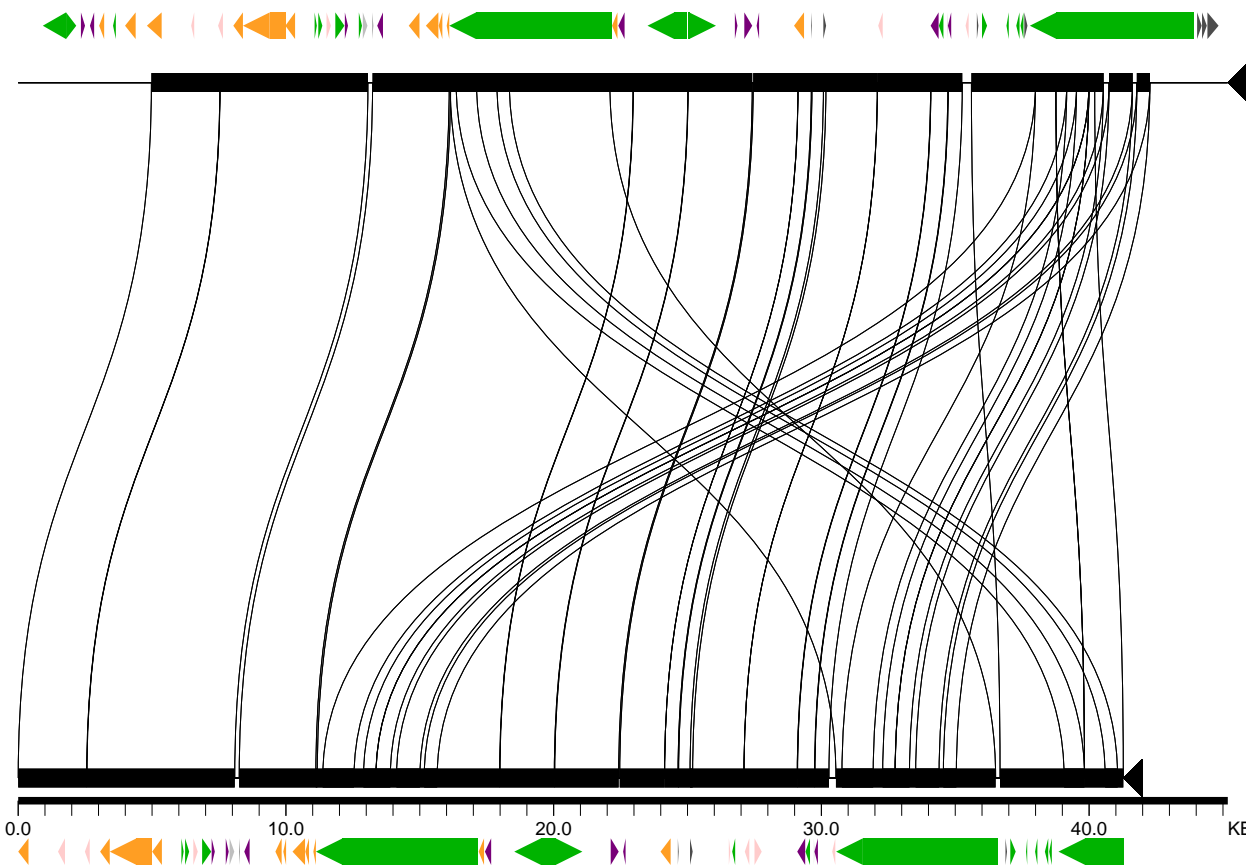

Clone: ABC10\_45528400\_I7 Accession: AC203604  
ESP Prediction: S Validation: I Mechanism: RETRO

Other Simple Repeat Low Complexity DNA LTR LINE SINE

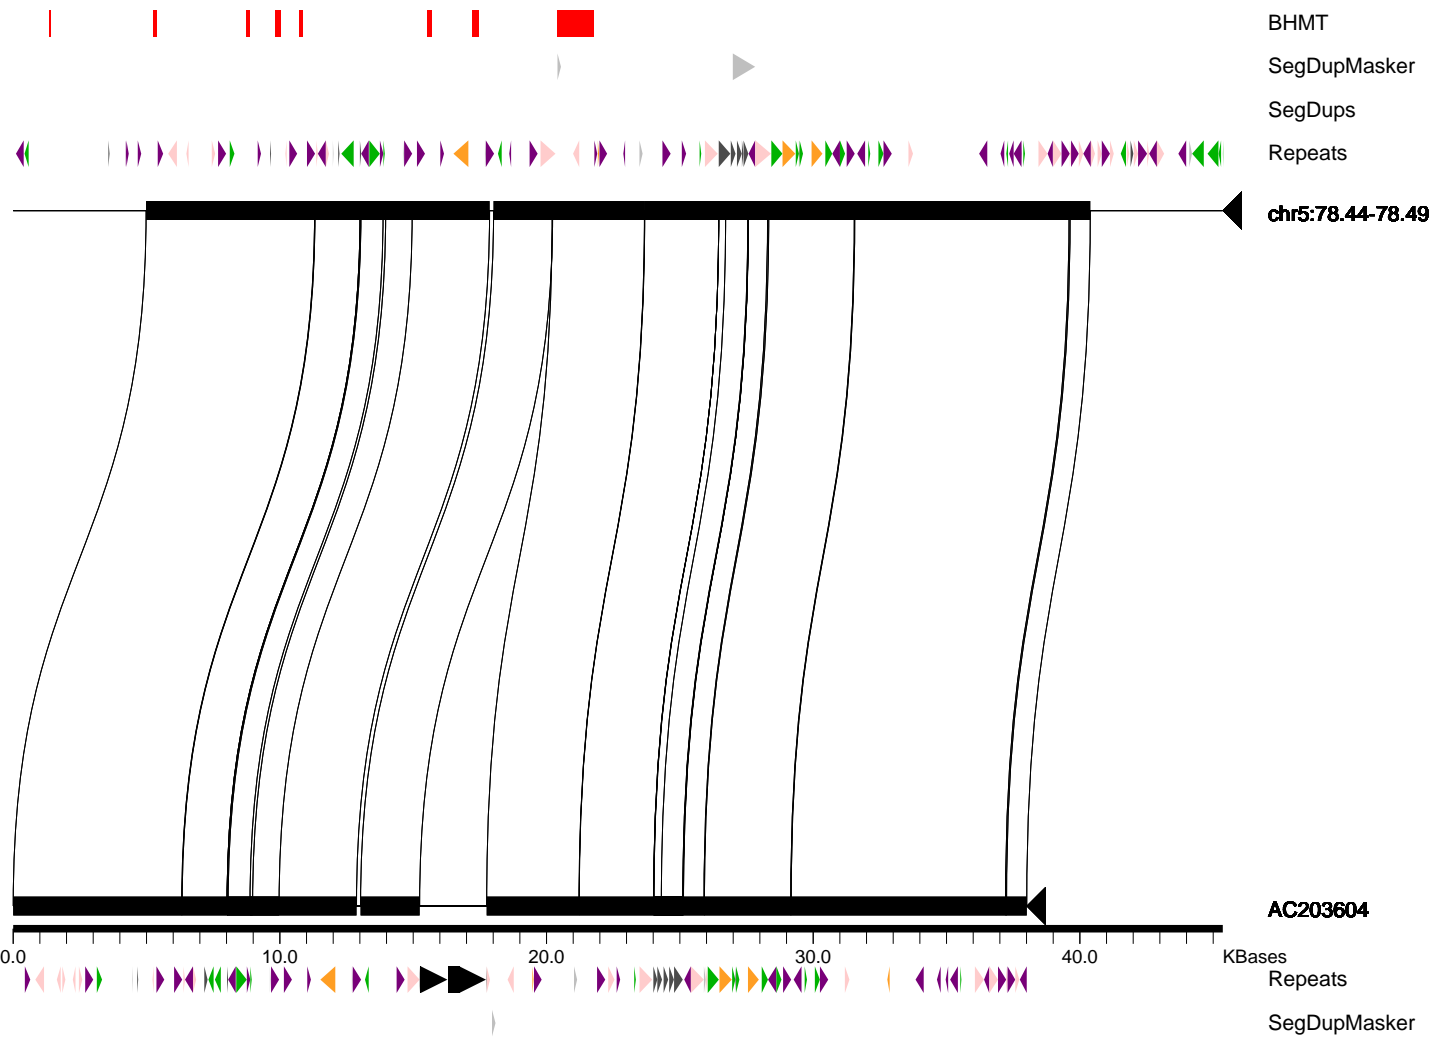

Clone: ABC10\_45542900\_P9 Accession: AC204967

ESP Prediction: S Validation: I Mechanism: RETRO

Other Simple Repeat Low Complexity DNA LTR LINE SINE

SegDupMasker

SegDups

Repeats

chr8:123.68-123.73

AC204967

KBases

Repeats

SegDupMasker

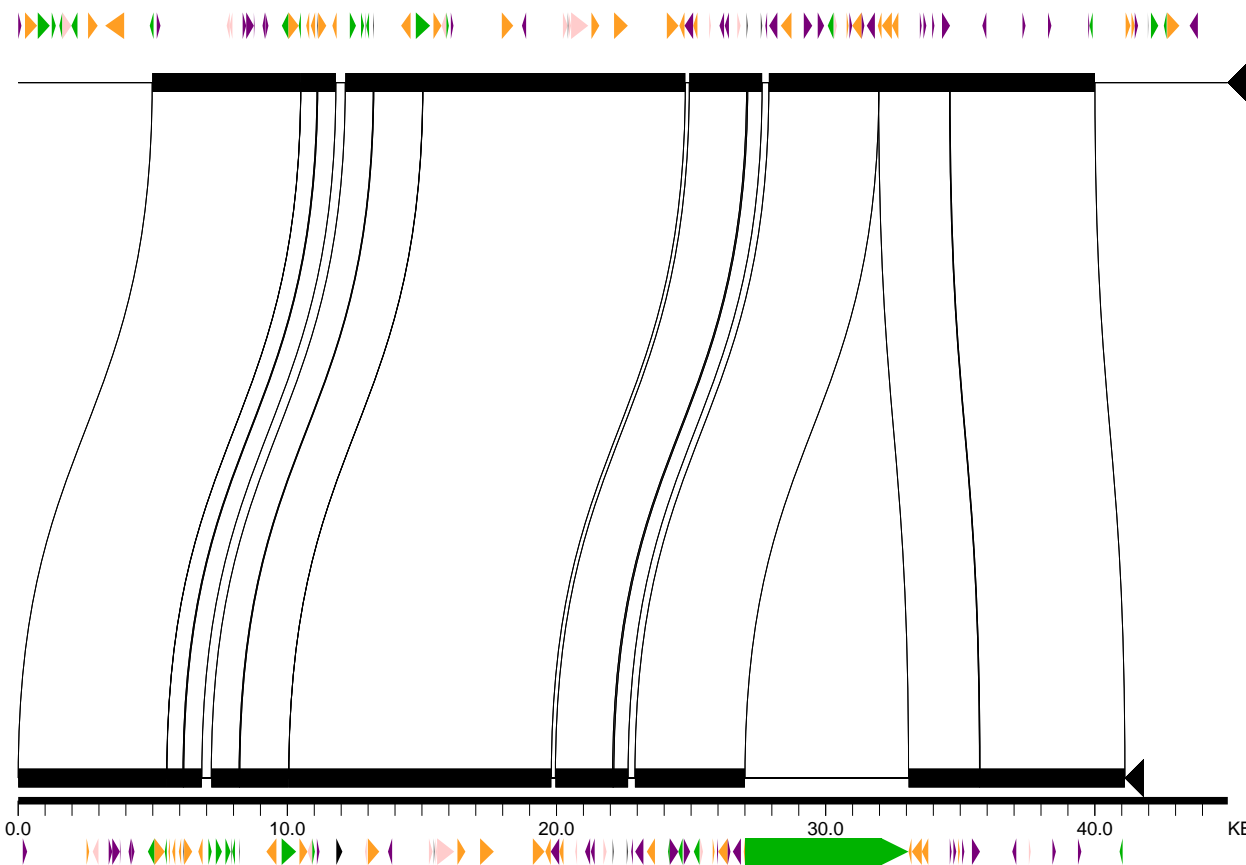

Clone: ABC10\_45545200\_J11 Accession: AC204965

ESP Prediction: S Validation: I Mechanism: RETRO

Other Simple Repeat Low Complexity DNA LTR LINE SINE

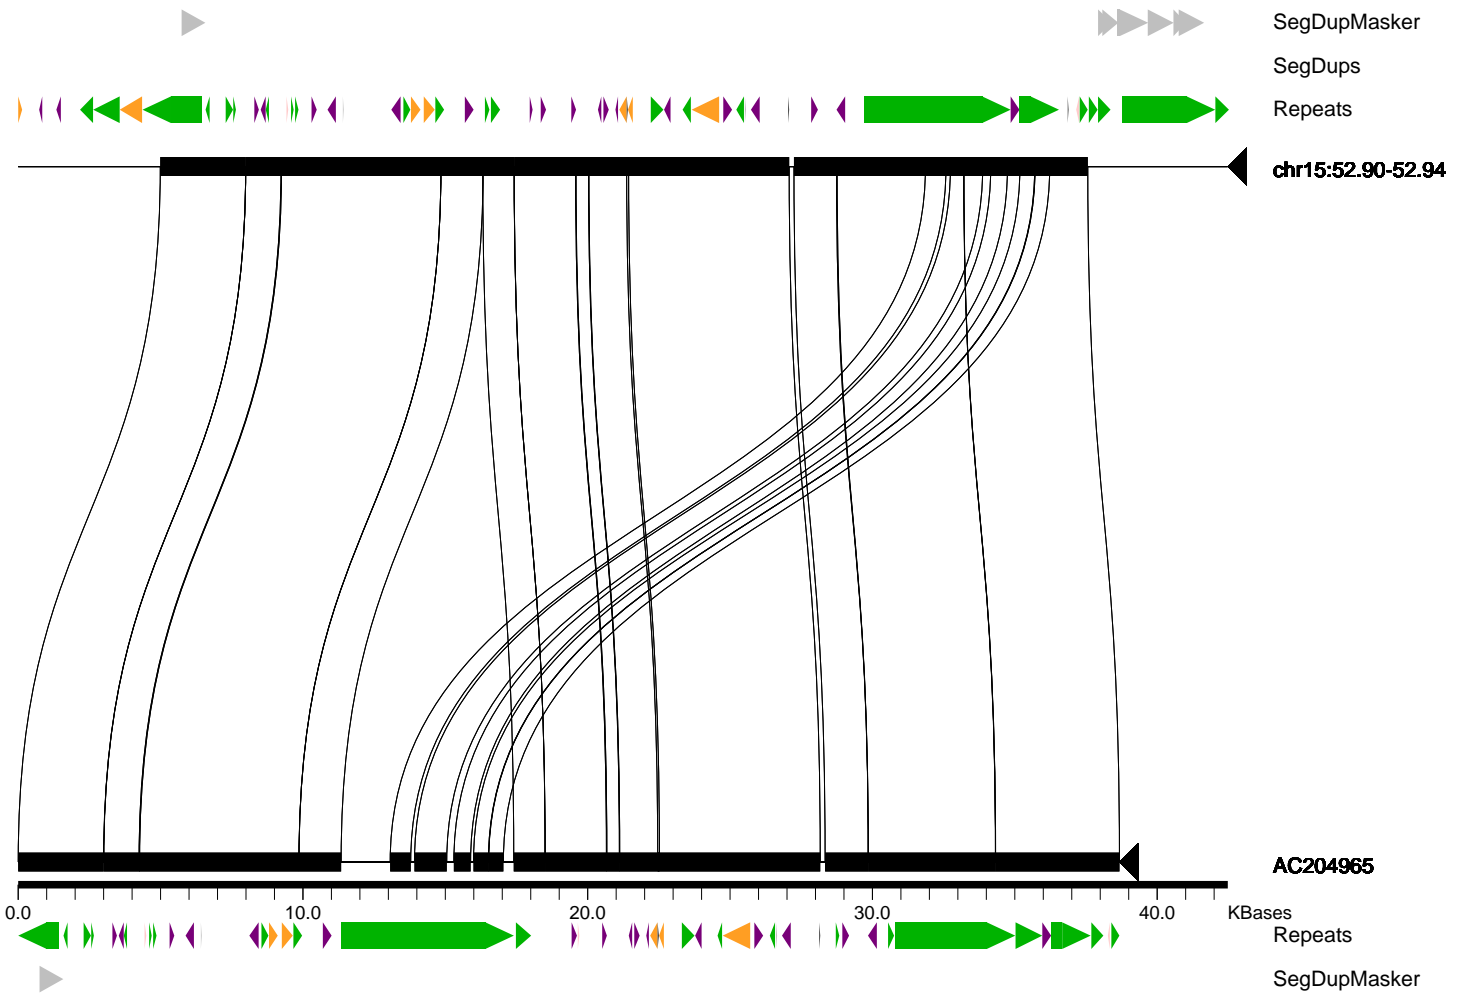



Clone: ABC9\_43939500\_G10 Accession: AC206740

ESP Prediction: B Validation: D Mechanism: RETRO

Other Simple Repeat Low Complexity DNA LTR LINE SINE

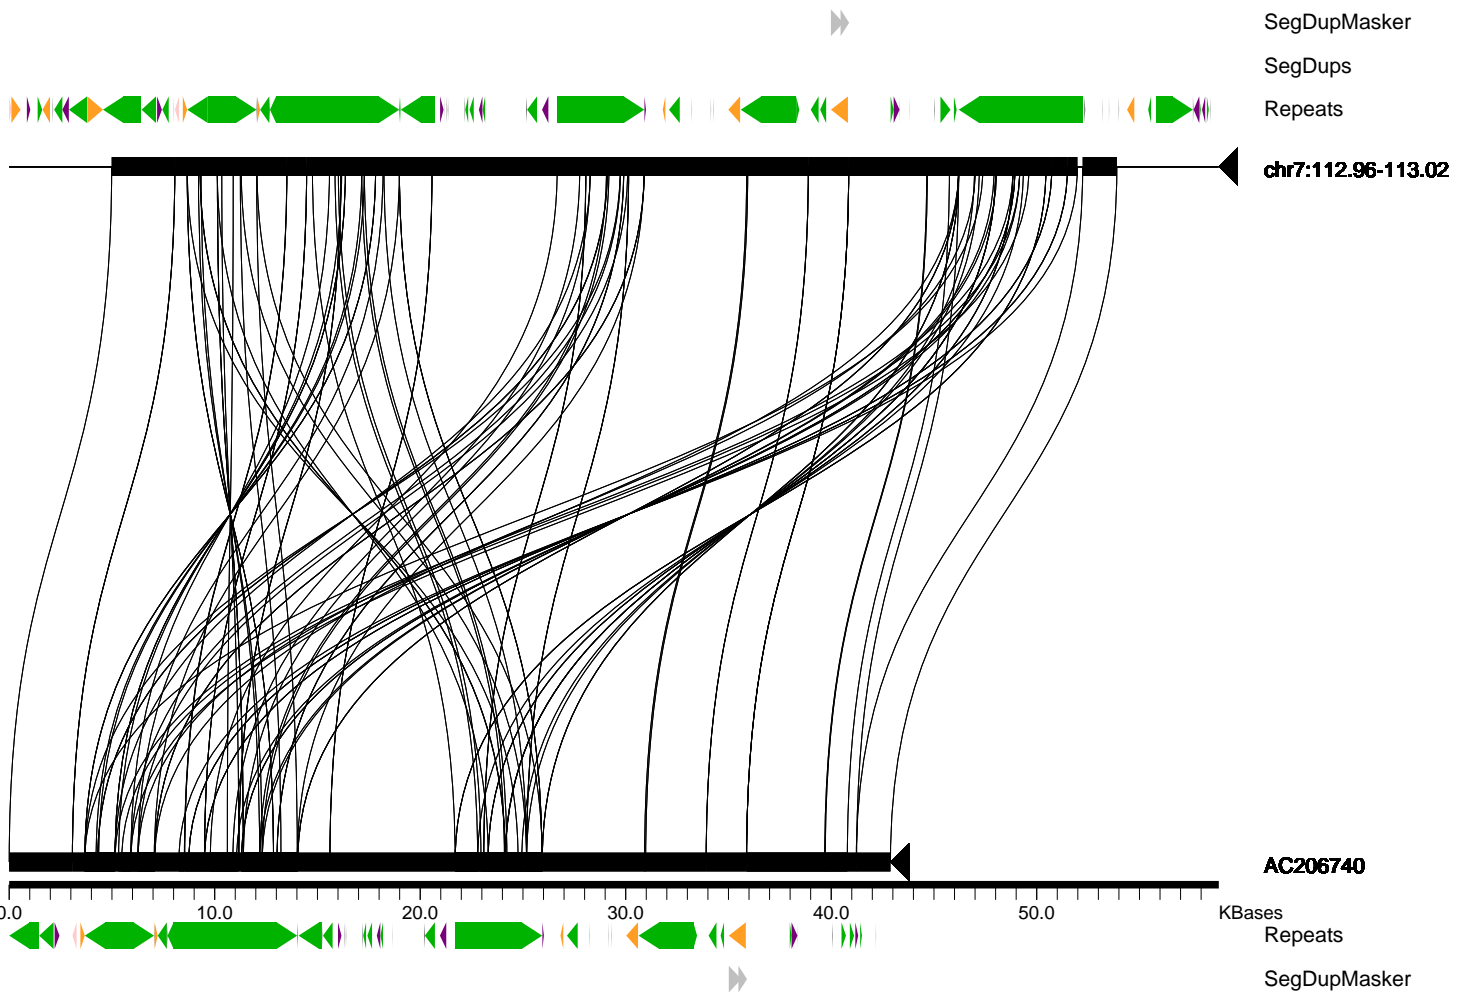

Clone: ABC9\_45366400\_D20 Accession: AC206603  
ESP Prediction: B Validation: D Mechanism: RETRO

Other Simple Repeat Low Complexity DNA LTR LINE SINE

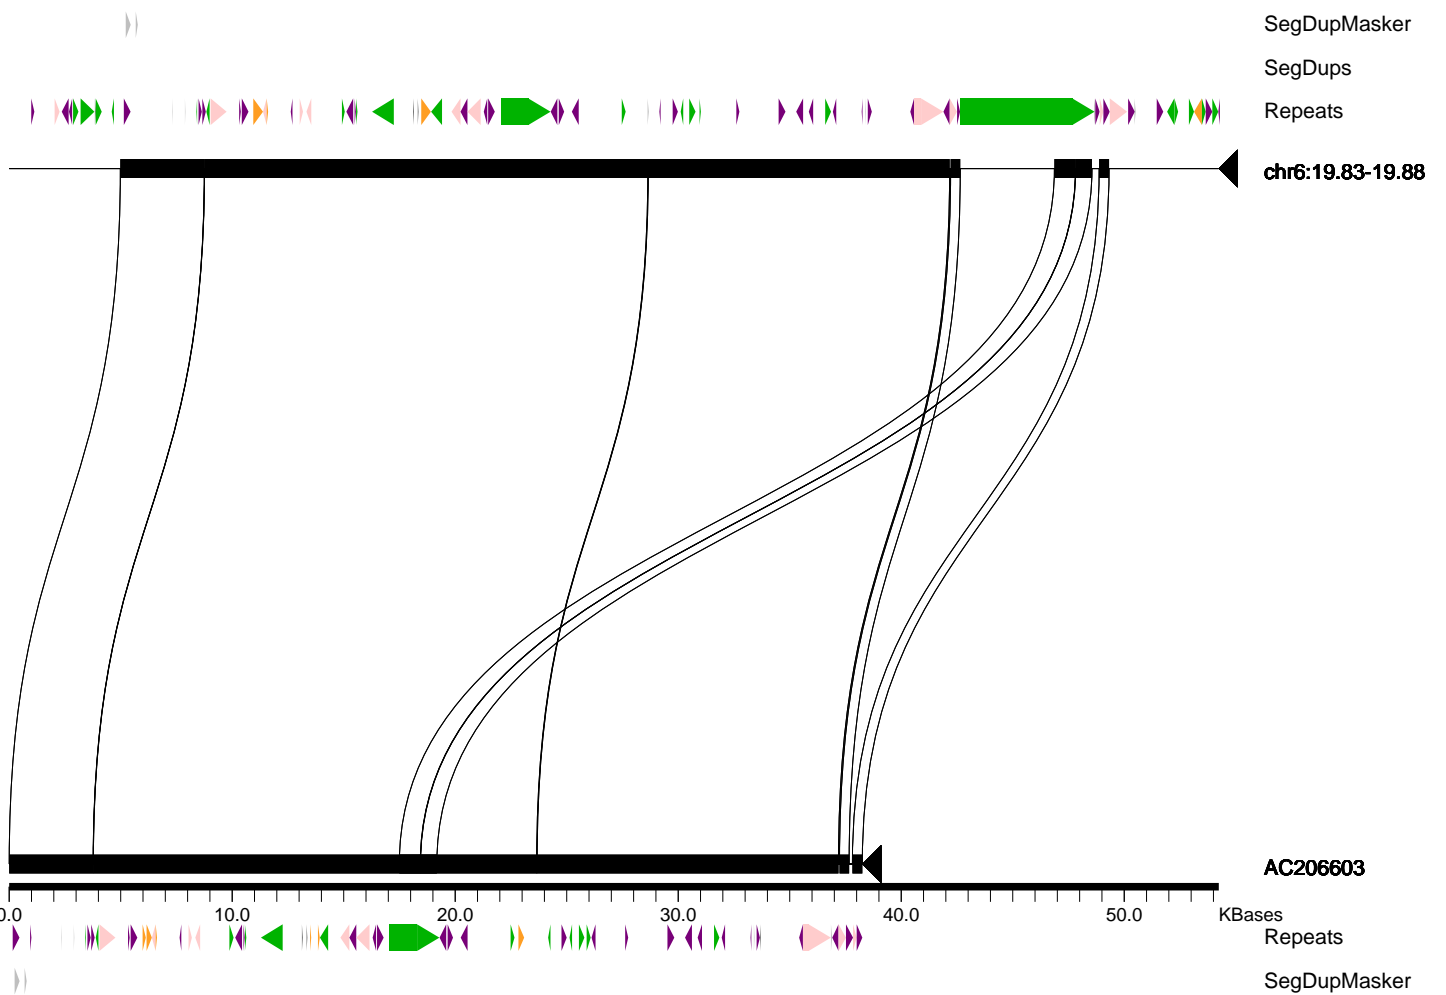

Clone: ABC10\_43644900\_H4 Accession: AC203619

ESP Prediction: S Validation: I Mechanism: RETRO

Other Simple Repeat Low Complexity DNA LTR LINE SINE

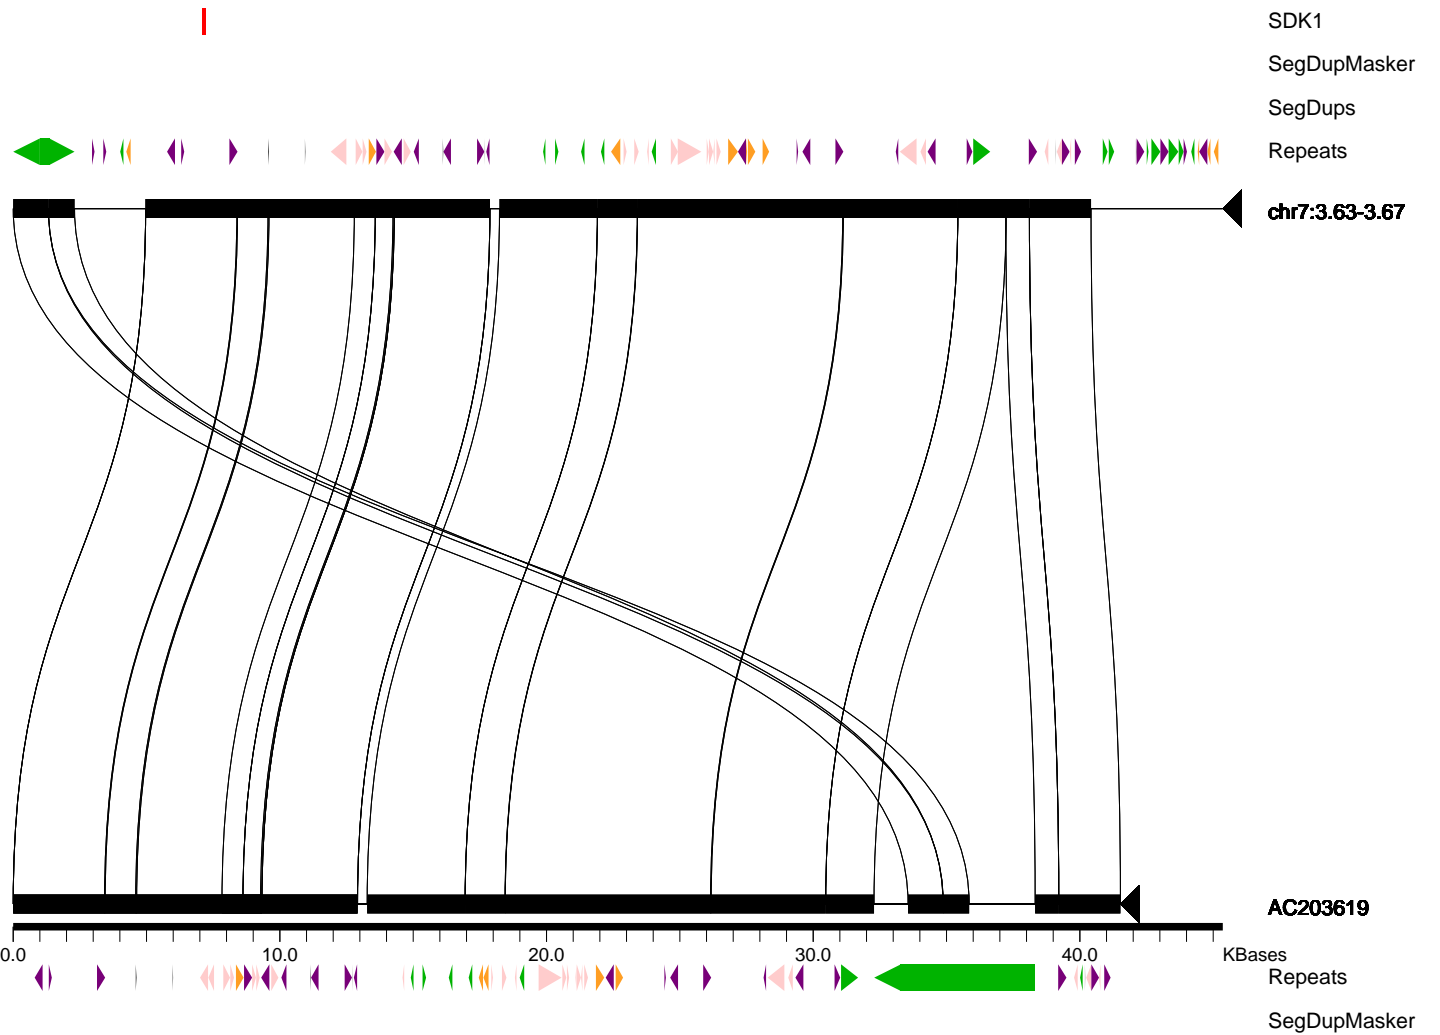

Clone: ABC10\_43666900\_A3 Accession: AC203635

ESP Prediction: S Validation: I Mechanism: RETRO

Other Simple Repeat Low Complexity DNA LTR LINE SINE

SegDupMasker

SegDups

Repeats

chr21:22.52-22.56

AC203635

KBases

Repeats

SegDupMasker

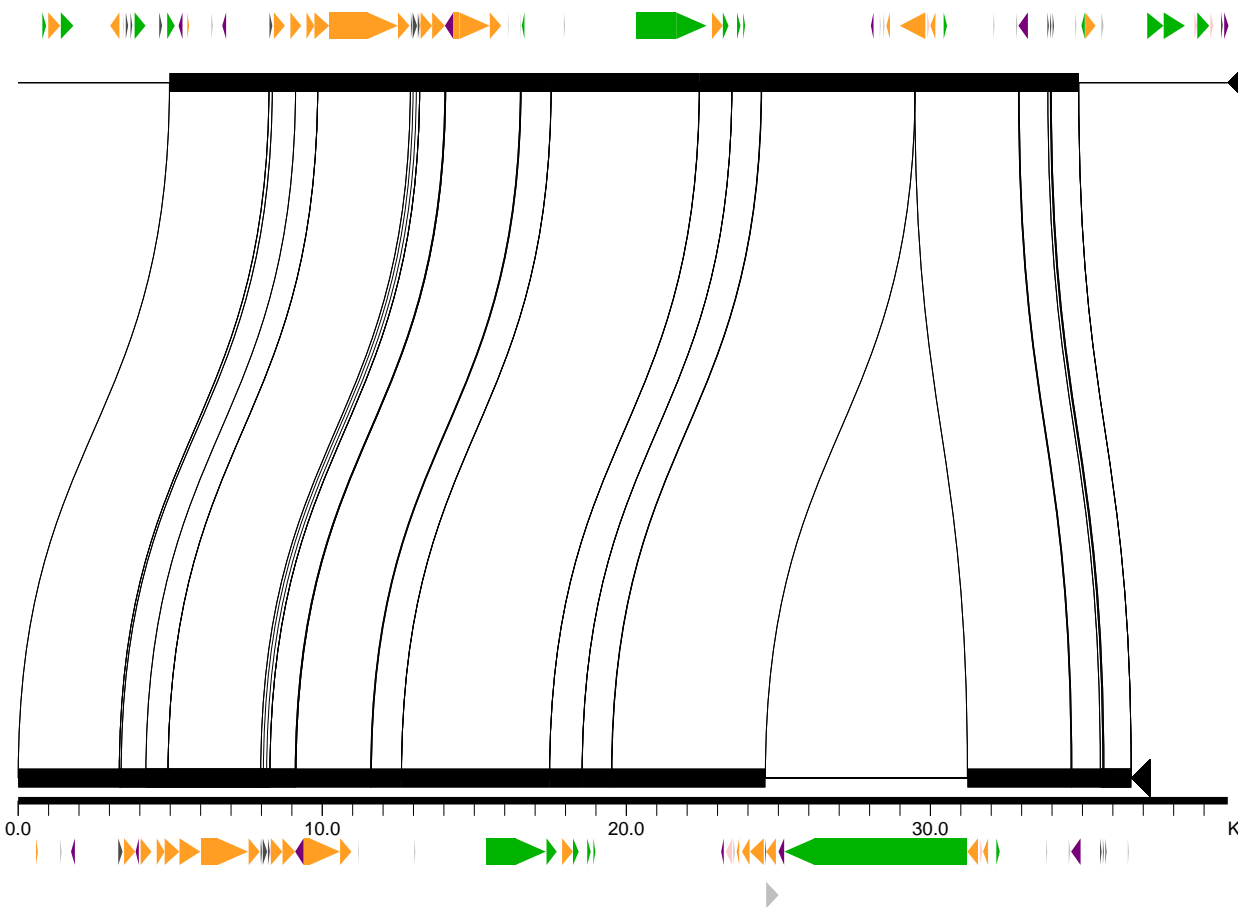

Clone: ABC10\_43667000\_H21 Accession: AC203662

ESP Prediction: S Validation: I Mechanism: RETRO

Other Simple Repeat Low Complexity DNA LTR LINE SINE

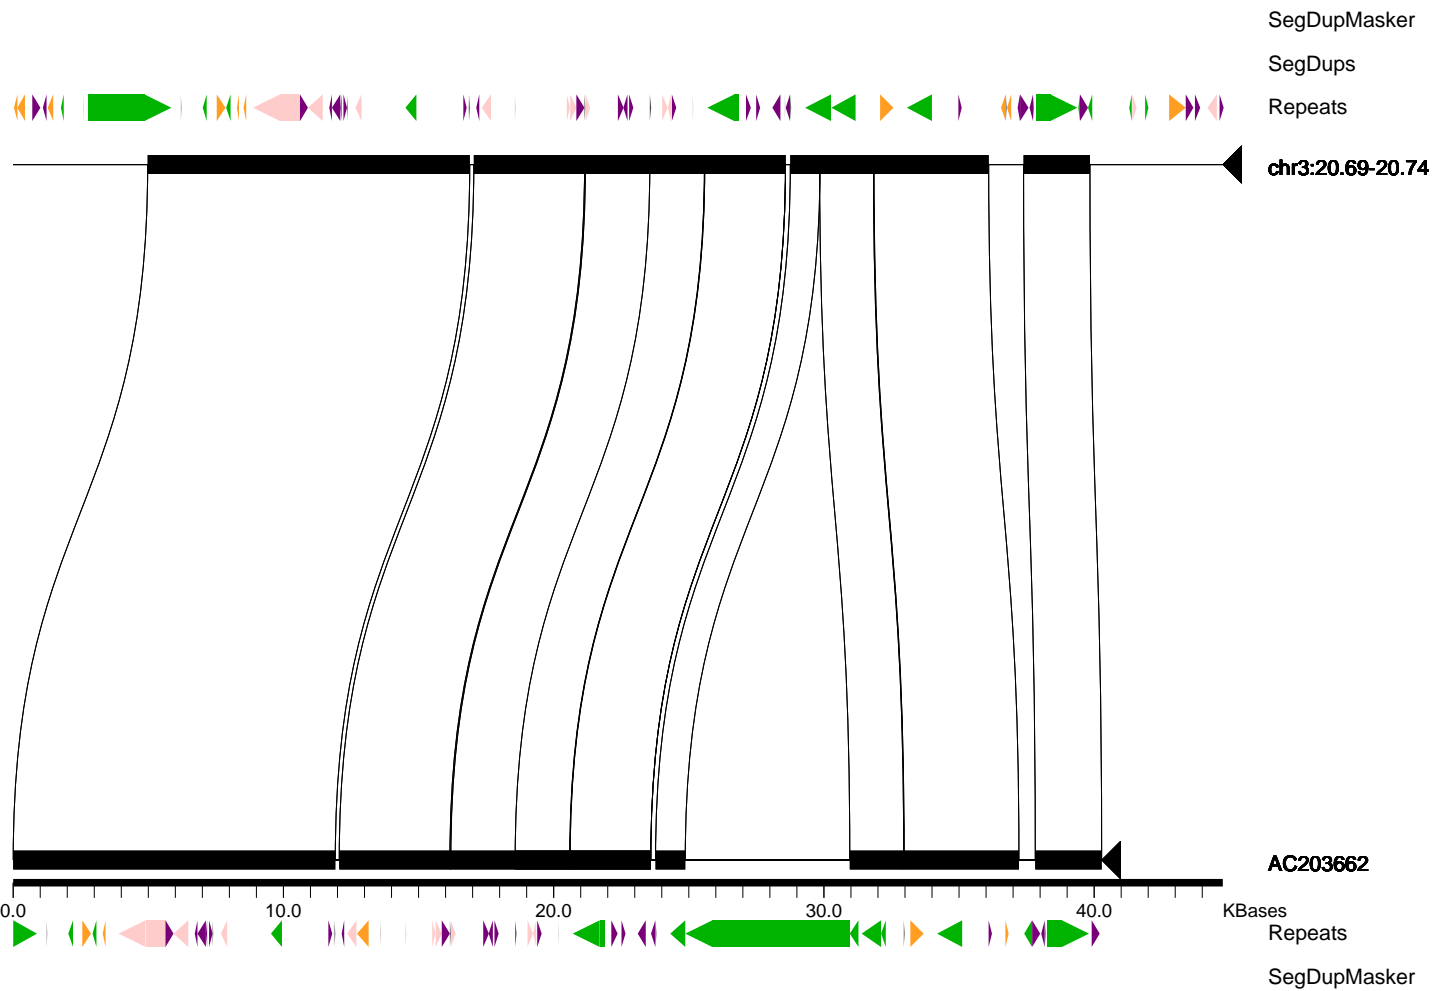

Clone: ABC10\_44088100\_H17 Accession: AC203624

ESP Prediction: S Validation: I Mechanism: RETRO

Other Simple Repeat Low Complexity DNA LTR LINE SINE

SegDupMasker

SegDups

Repeats

chr18:49.65-49.70

AC203624

KBases

Repeats

SegDupMasker

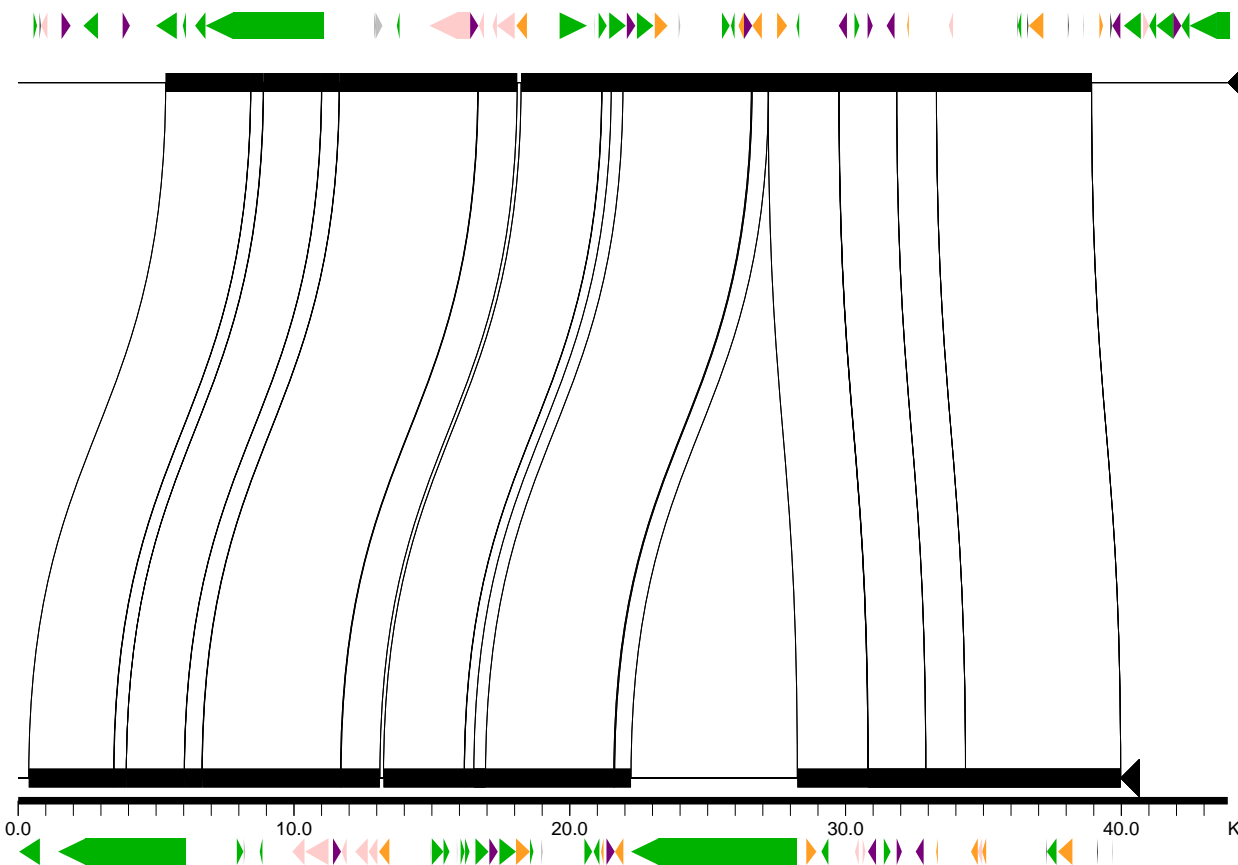

Clone: ABC10\_44088700\_G10 Accession: AC204956

ESP Prediction: S Validation: I Mechanism: RETRO

Other Simple Repeat Low Complexity DNA LTR LINE SINE

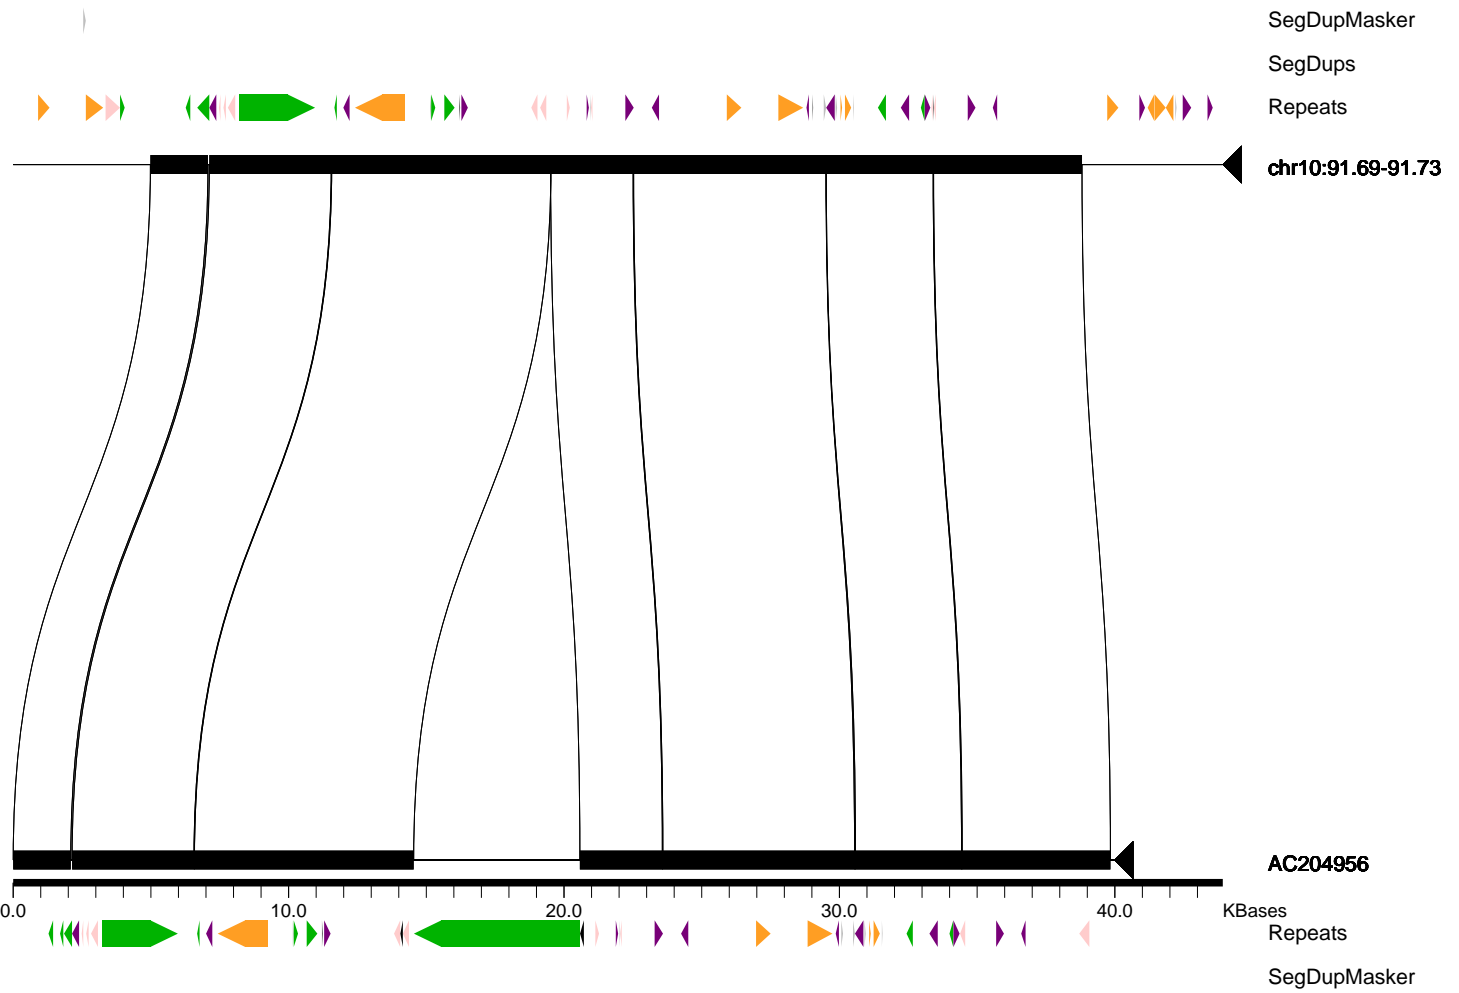

Clone: ABC10\_44492700\_P8 Accession: AC203651

ESP Prediction: S Validation: I Mechanism: RETRO

Other Simple Repeat Low Complexity DNA LTR LINE SINE

SegDupMasker

SegDups

Repeats

chr4:82.54-82.58

AC203651

KBases

Repeats

SegDupMasker

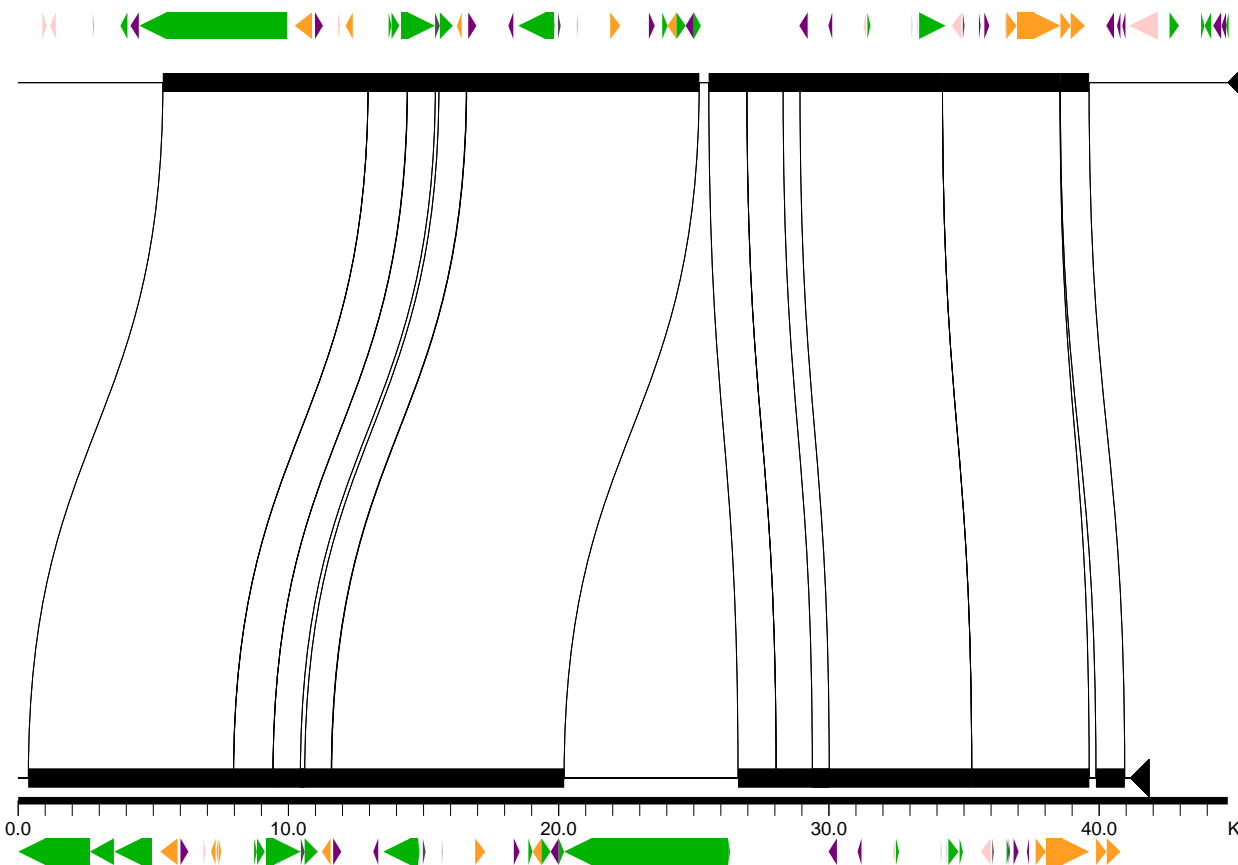



Clone: ABC10\_44511300\_D10 Accession: AC203628

ESP Prediction: S Validation: I Mechanism: RETRO

Other Simple Repeat Low Complexity DNA LTR LINE SINE

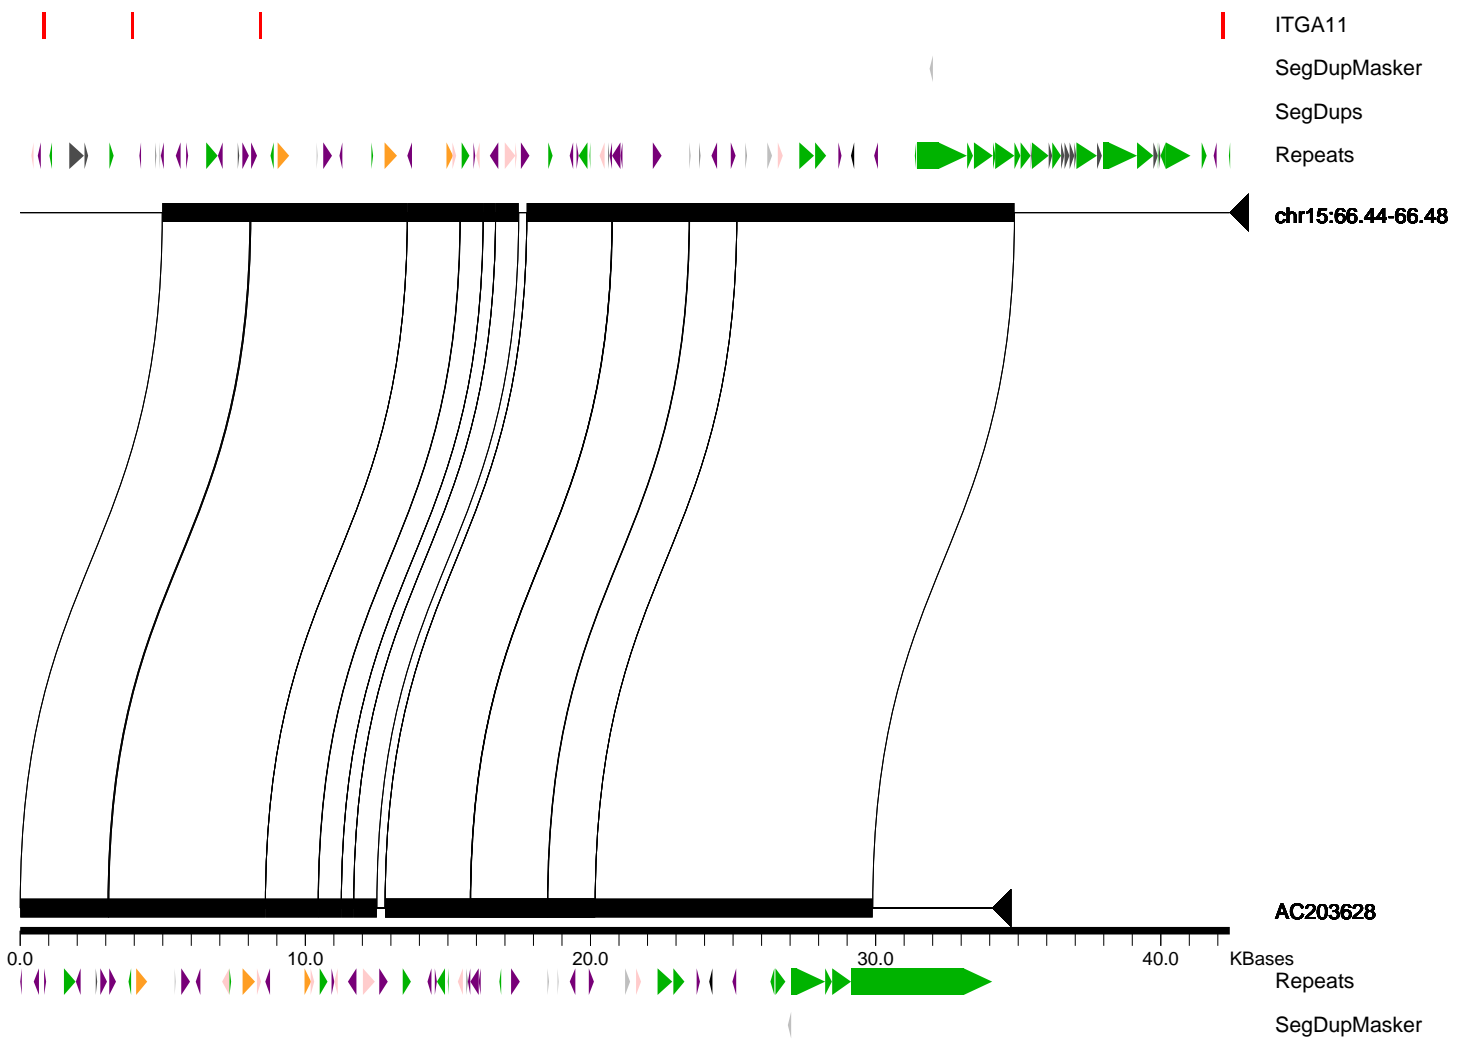

Clone: ABC10\_44531000\_A6 Accession: AC203600

ESP Prediction: S Validation: I Mechanism: RETRO

Other Simple Repeat Low Complexity DNA LTR LINE SINE

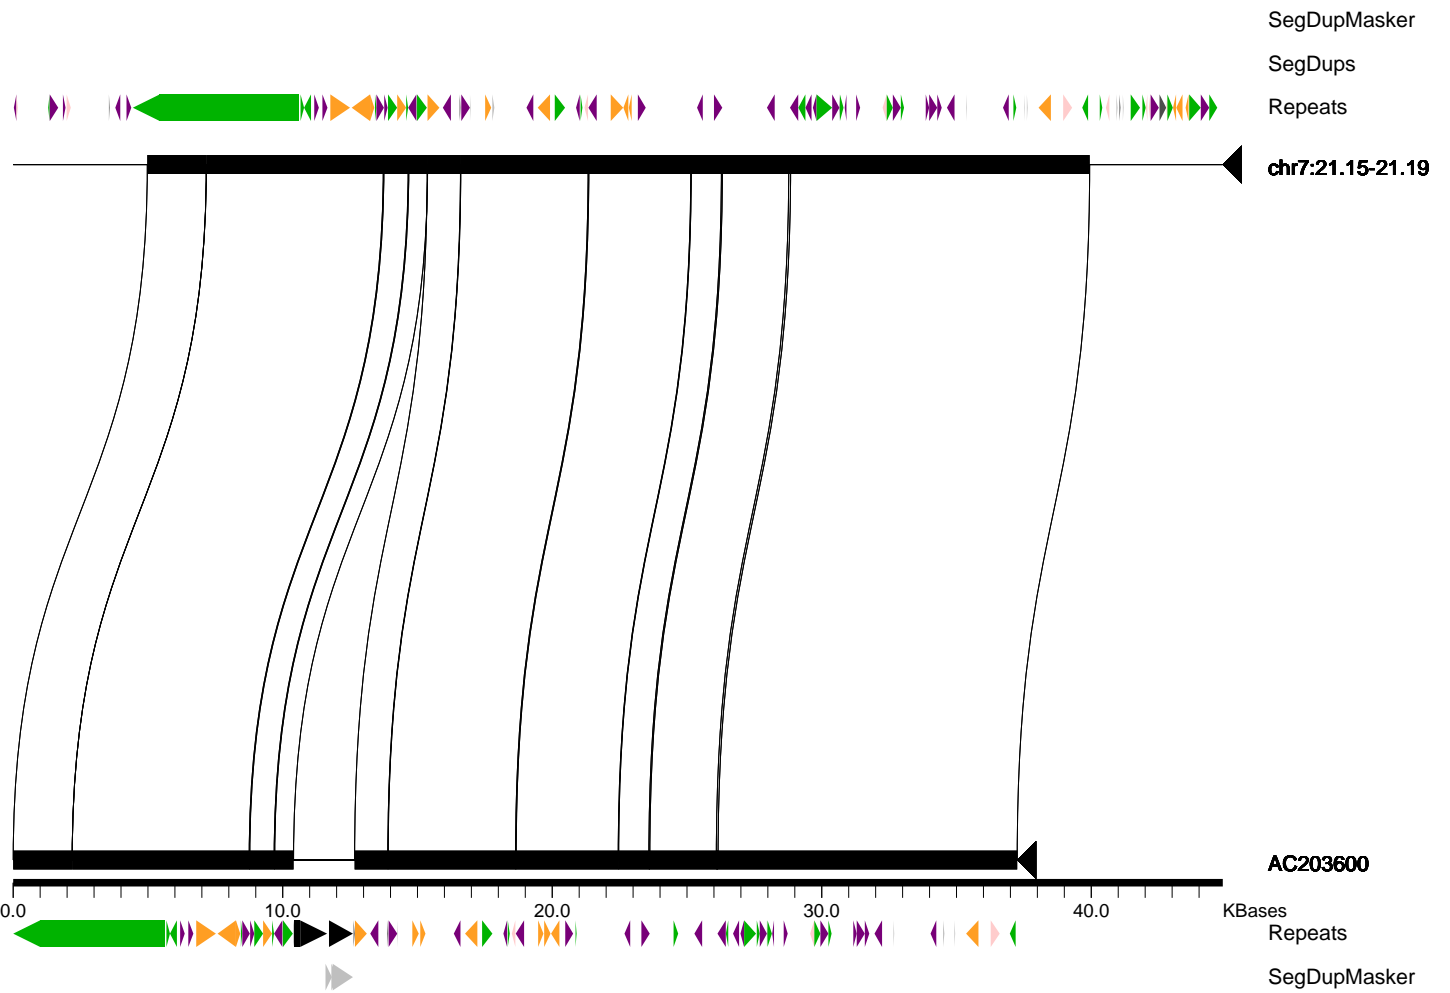

Clone: ABC10\_44540700\_I10 Accession: AC203602

ESP Prediction: B Validation: D Mechanism: RETRO

Other Simple Repeat Low Complexity DNA LTR LINE SINE

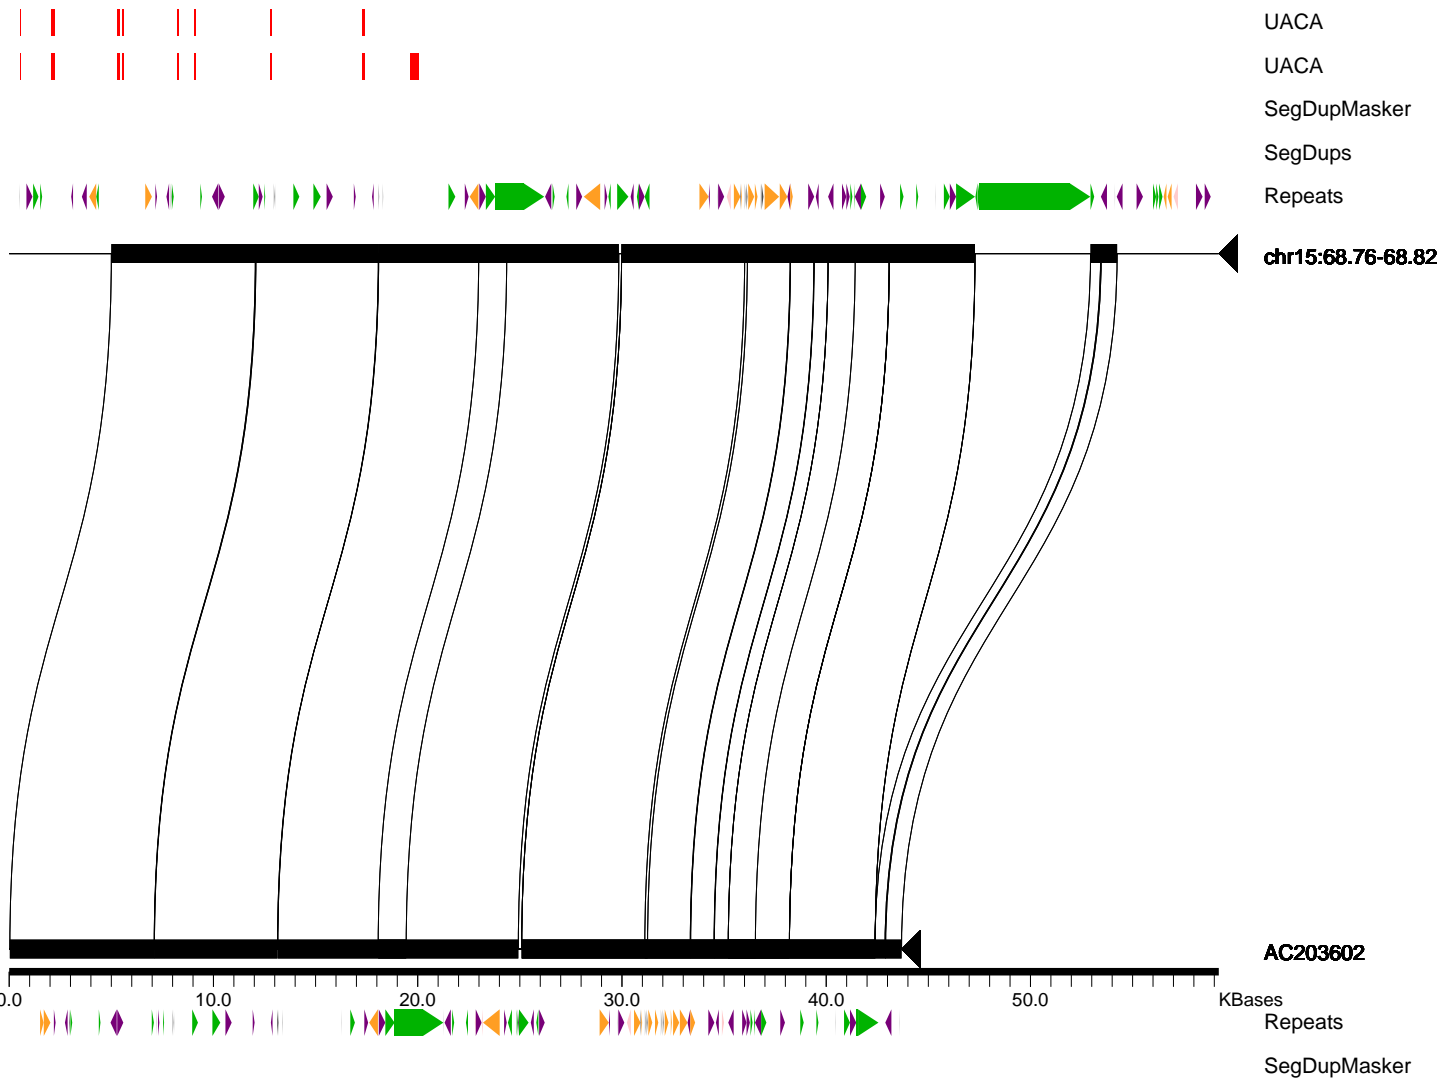

Clone: ABC10\_44545600\_I1 Accession: AC203597  
ESP Prediction: S Validation: I Mechanism: RETRO

Other Simple Repeat Low Complexity DNA LTR LINE SINE

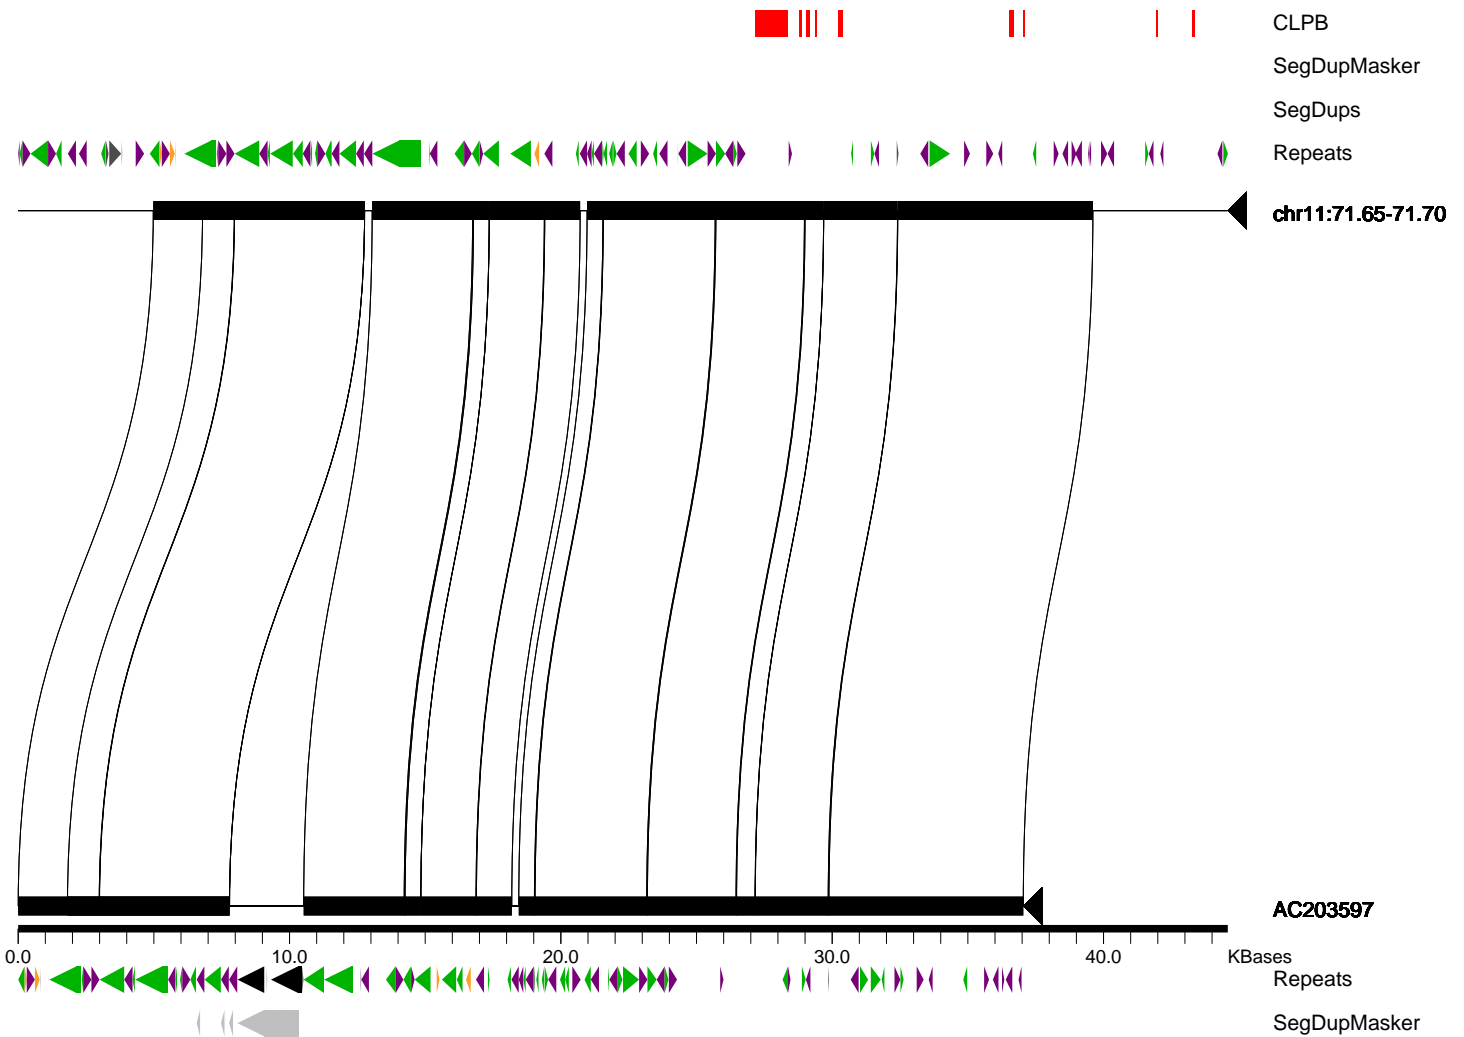

Clone: ABC10\_44551300\_P12 Accession: AC203592

ESP Prediction: S Validation: I Mechanism: RETRO

Other Simple Repeat Low Complexity DNA LTR LINE SINE

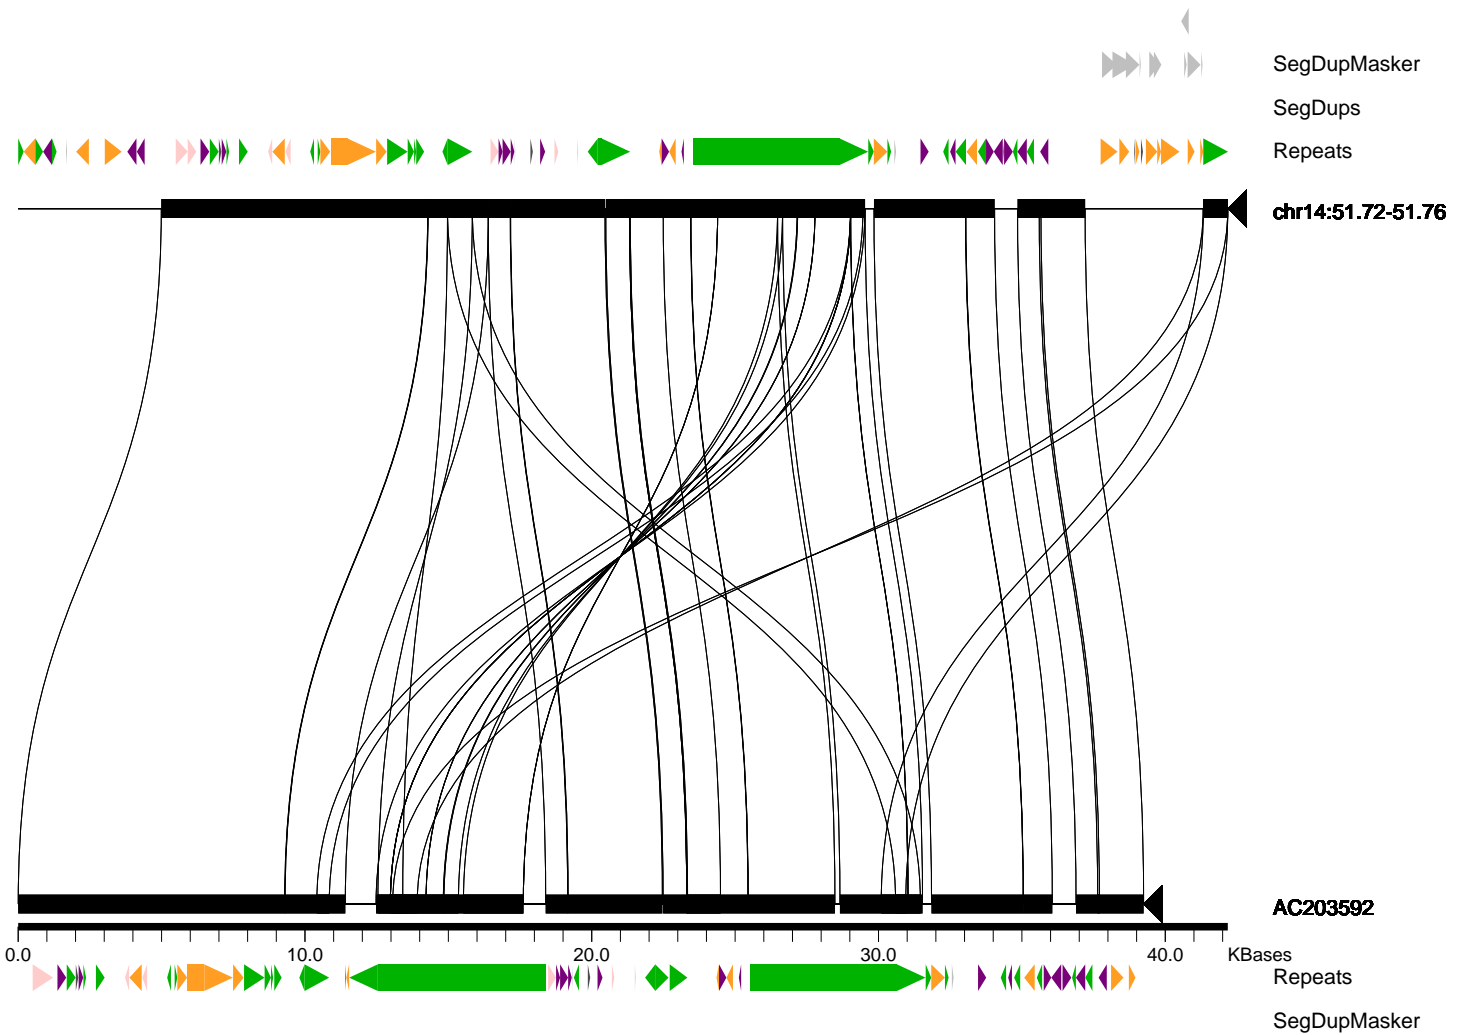

Clone: ABC12\_46795000\_D12 Accession: AC206894

ESP Prediction: B Validation: D Mechanism: RETRO

Other Simple Repeat Low Complexity DNA LTR LINE SINE

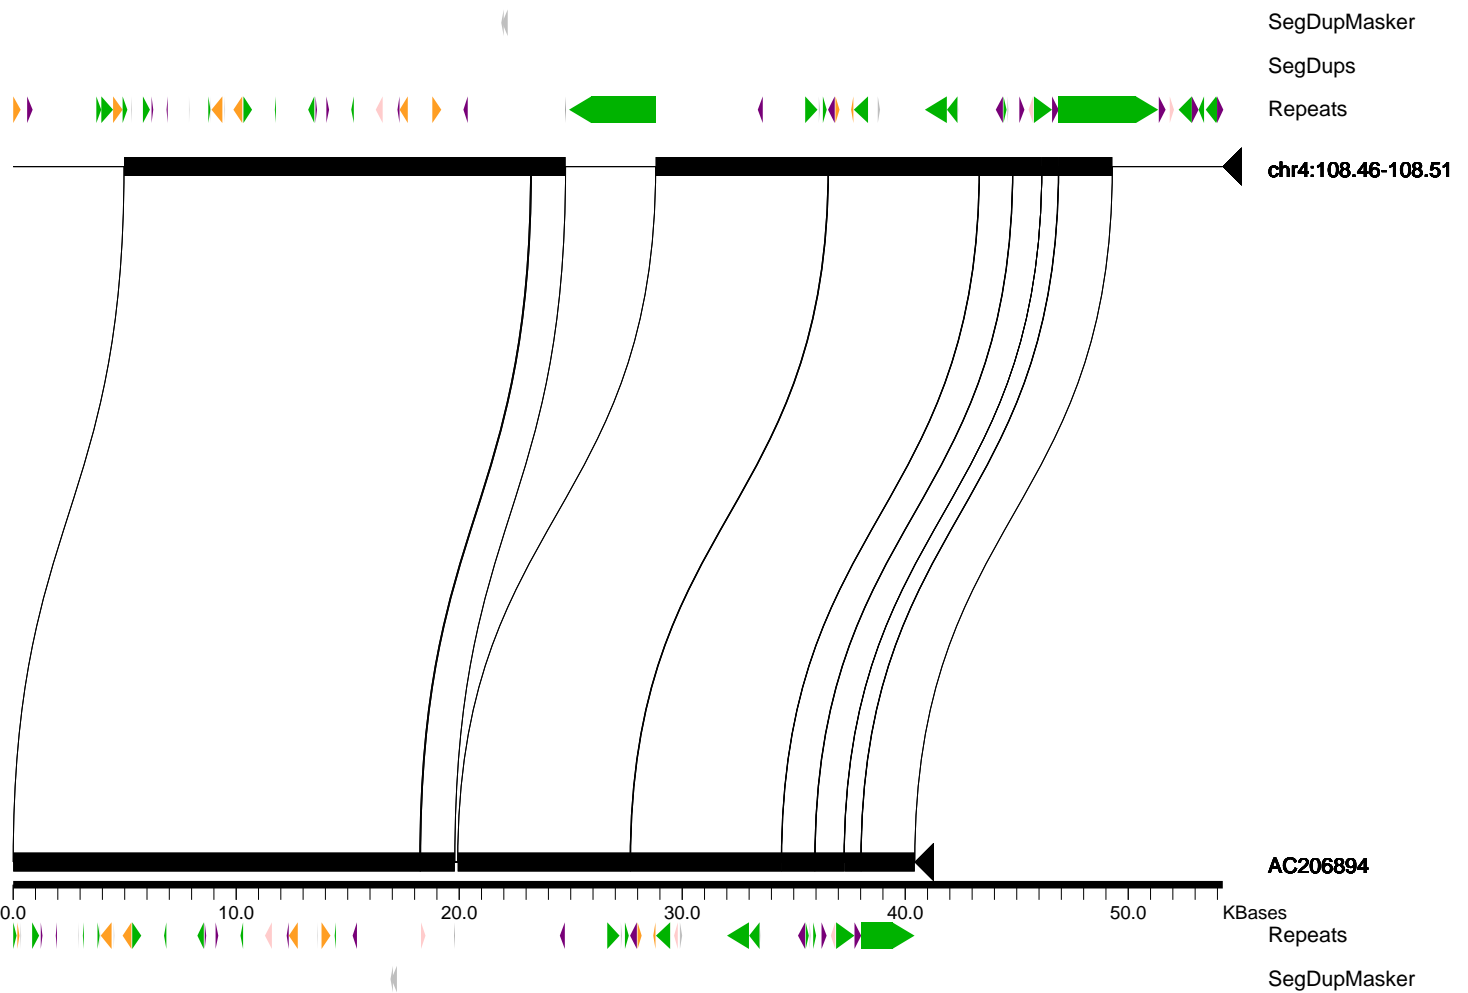

Clone: ABC12\_49211600\_F12 Accession: AC204955

ESP Prediction: B Validation: D Mechanism: RETRO

Other Simple Repeat Low Complexity DNA LTR LINE SINE

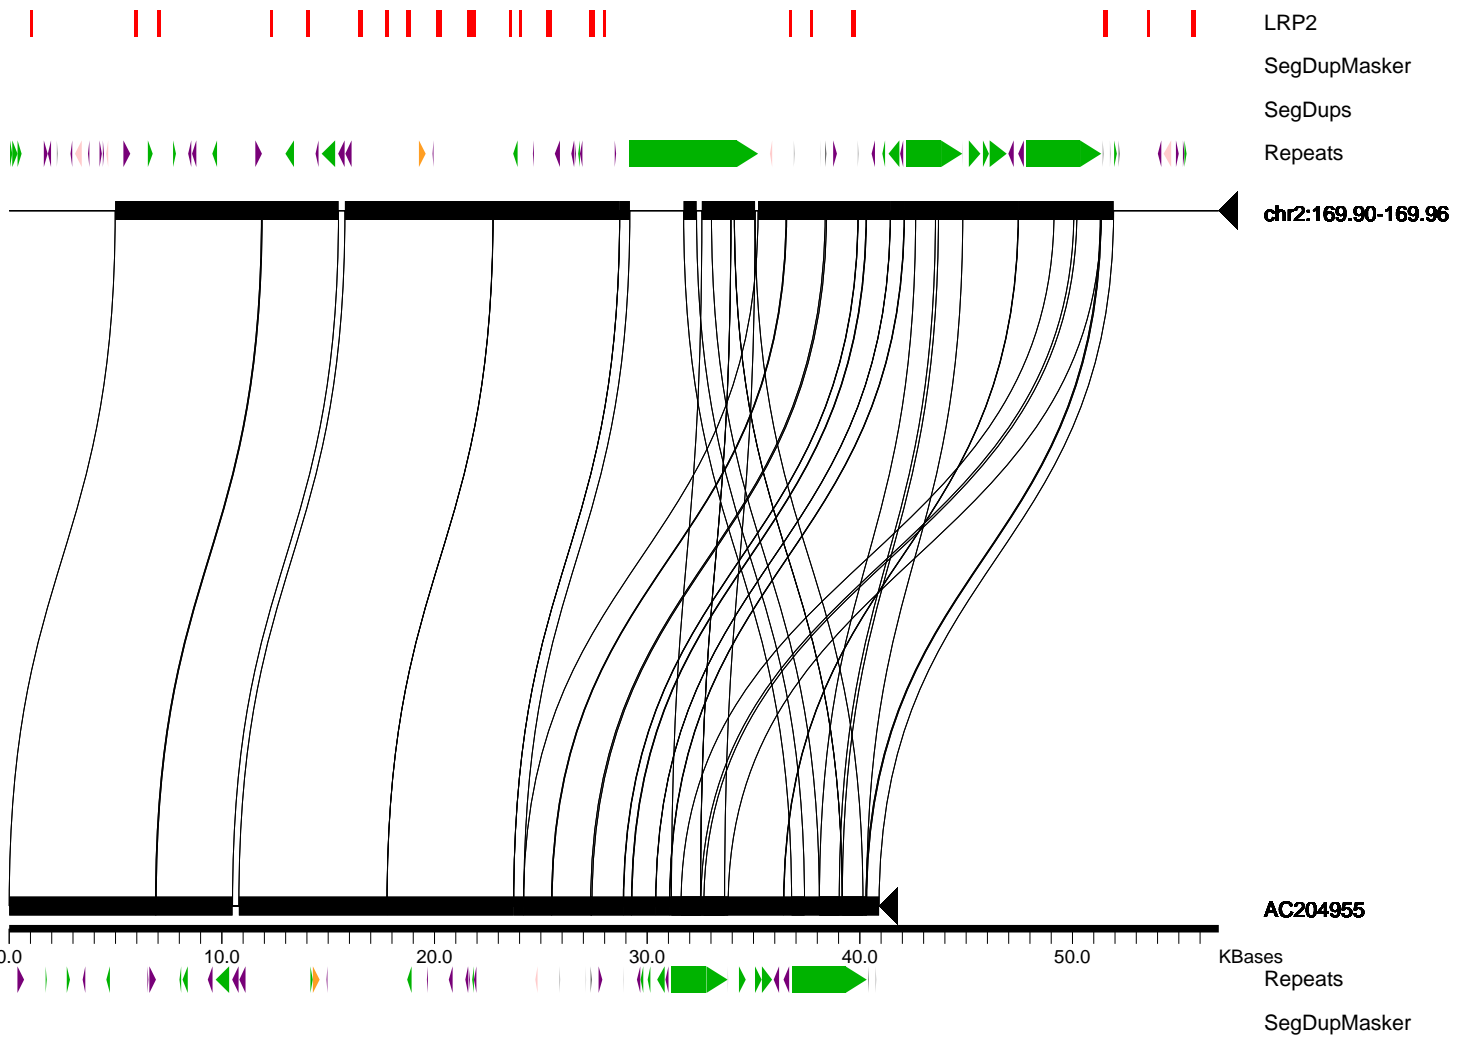

Clone: ABC7\_547522\_K6 Accession: AC213228

ESP Prediction: B Validation: D Mechanism: RETRO

Other Simple Repeat Low Complexity DNA LTR LINE SINE

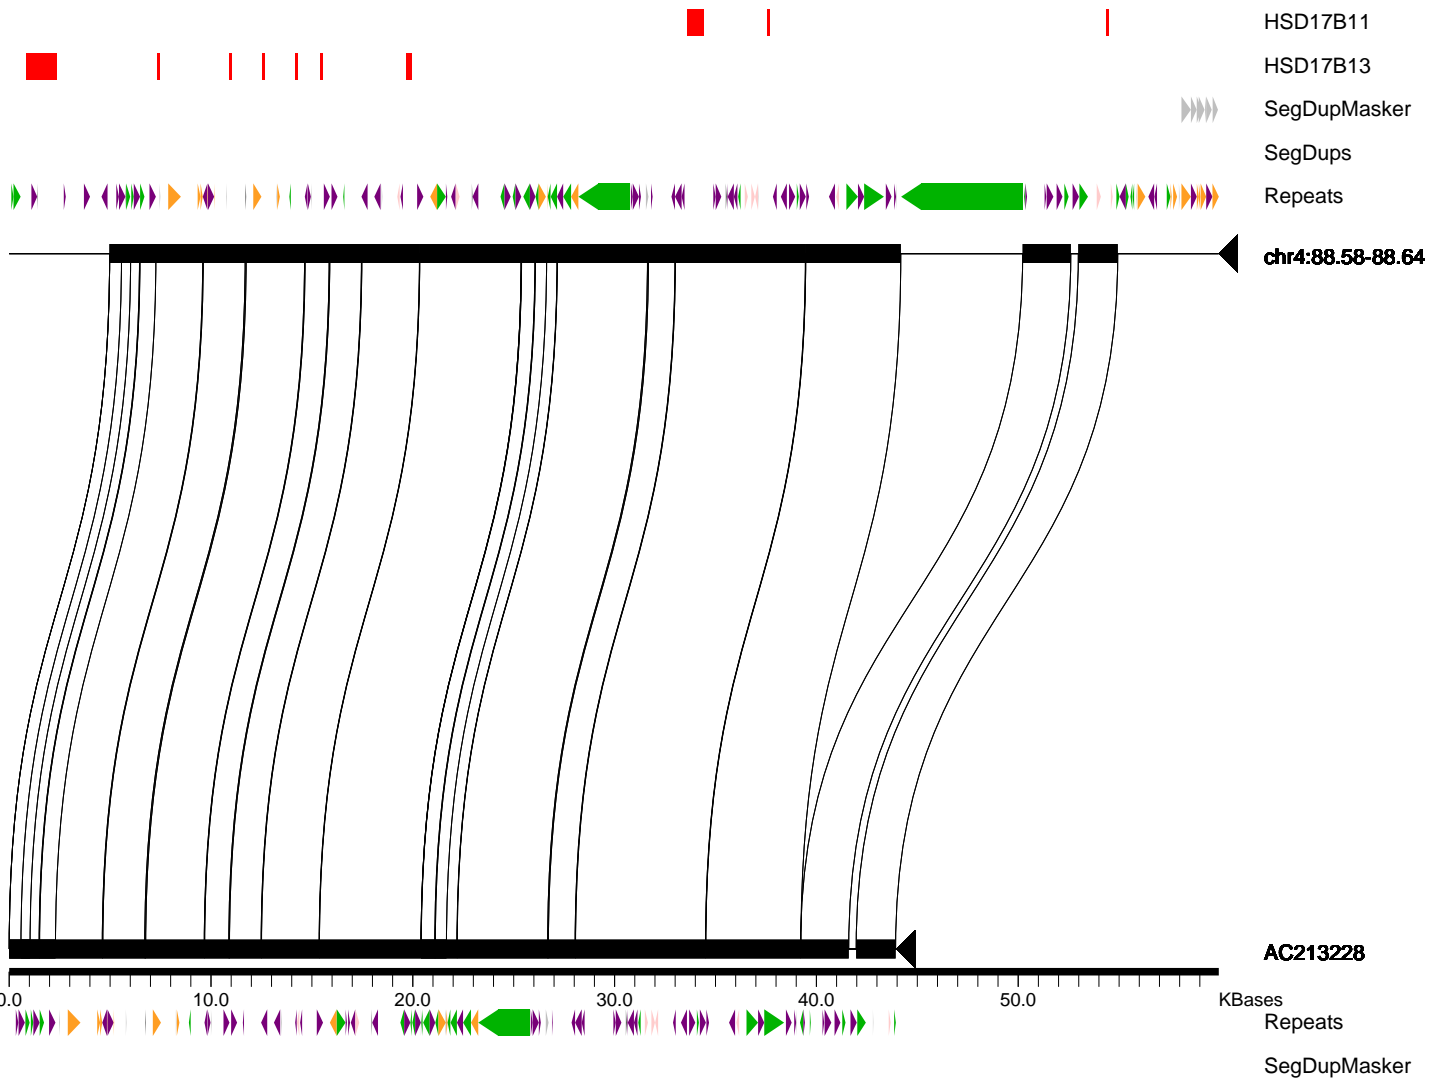



Clone: ABC7\_42434600\_A5 Accession: AC213218  
ESP Prediction: B Validation: D Mechanism: RETRO

Other Simple Repeat Low Complexity DNA LTR LINE SINE

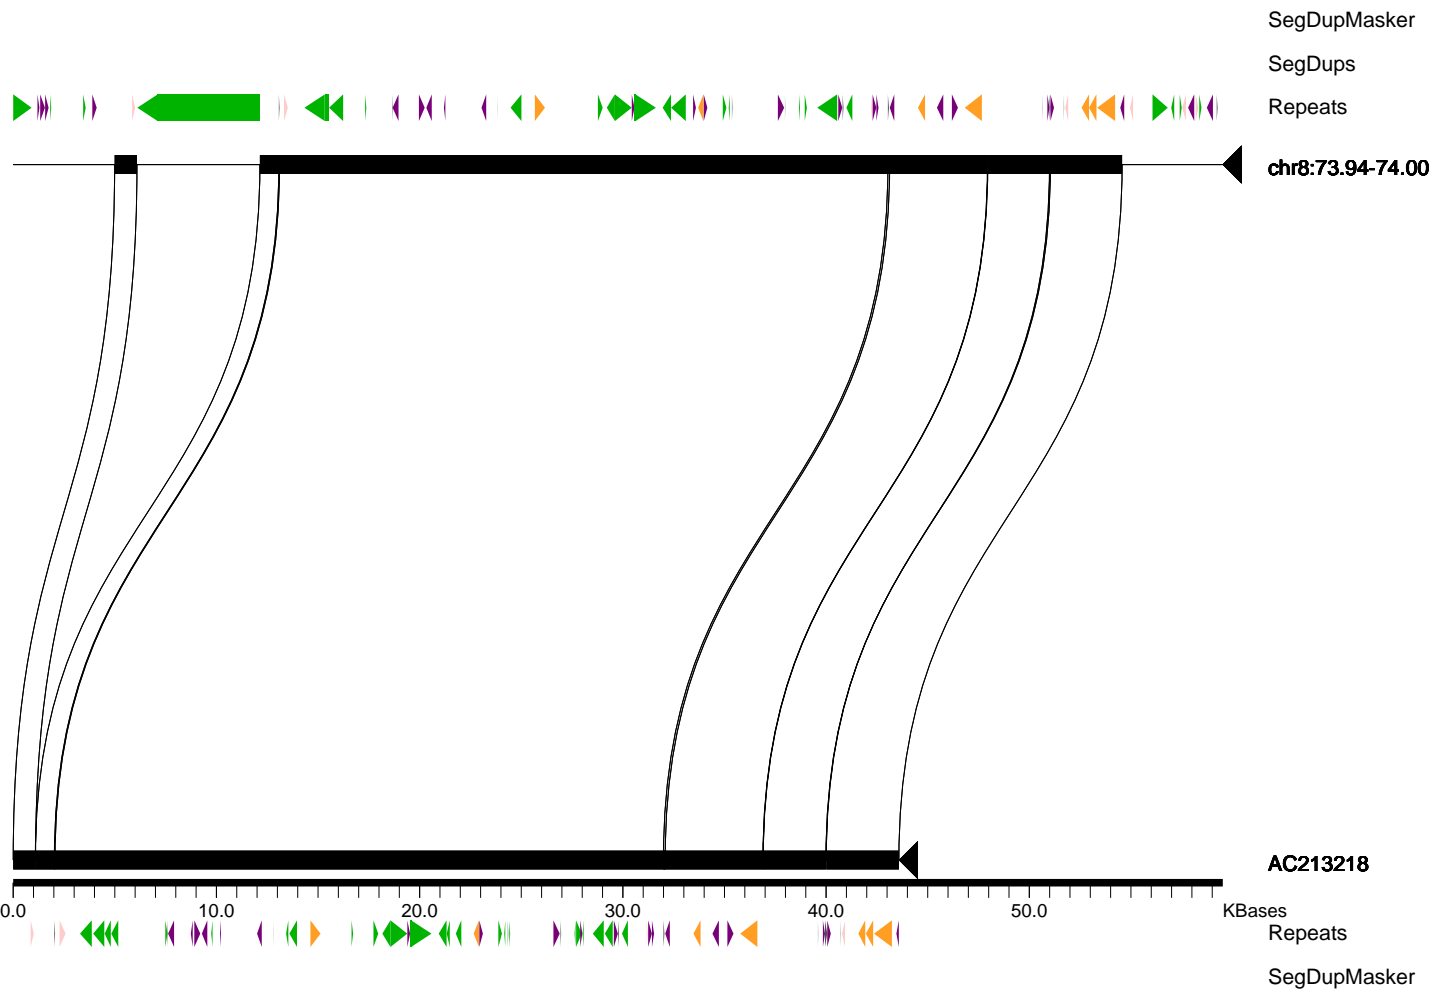

Clone: ABC8\_651022\_L4 Accession: AC213268

ESP Prediction: B Validation: D Mechanism: RETRO

Other Simple Repeat Low Complexity DNA LTR LINE SINE

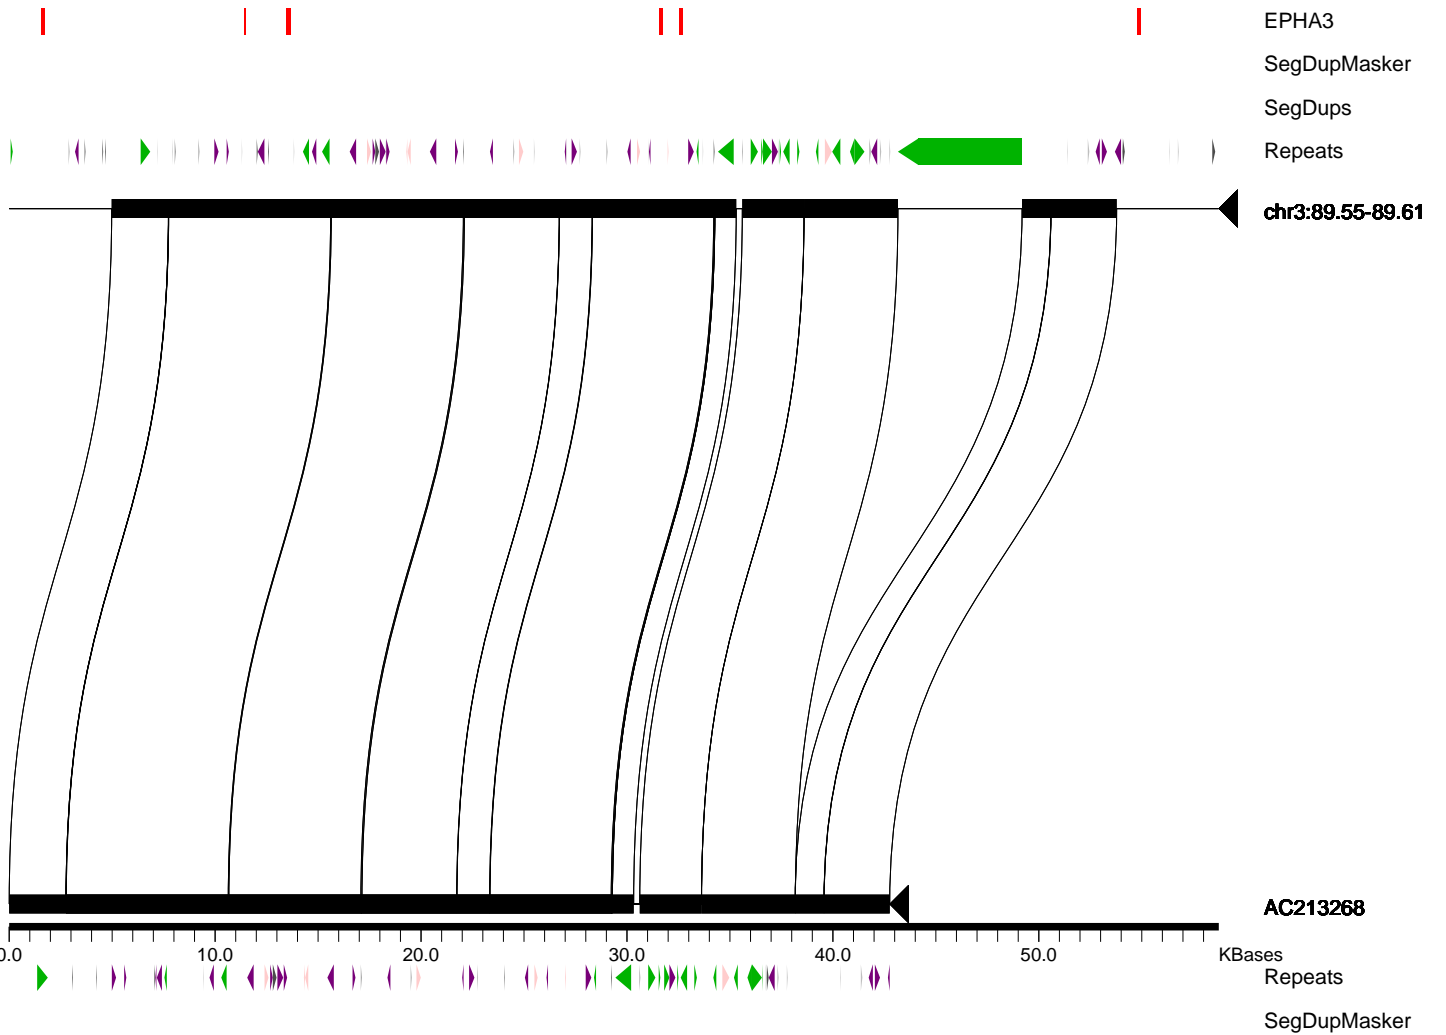

Clone: ABC8\_5713449\_C13 Accession: AC213506  
ESP Prediction: B Validation: D Mechanism: RETRO

Other Simple Repeat Low Complexity DNA LTR LINE SINE

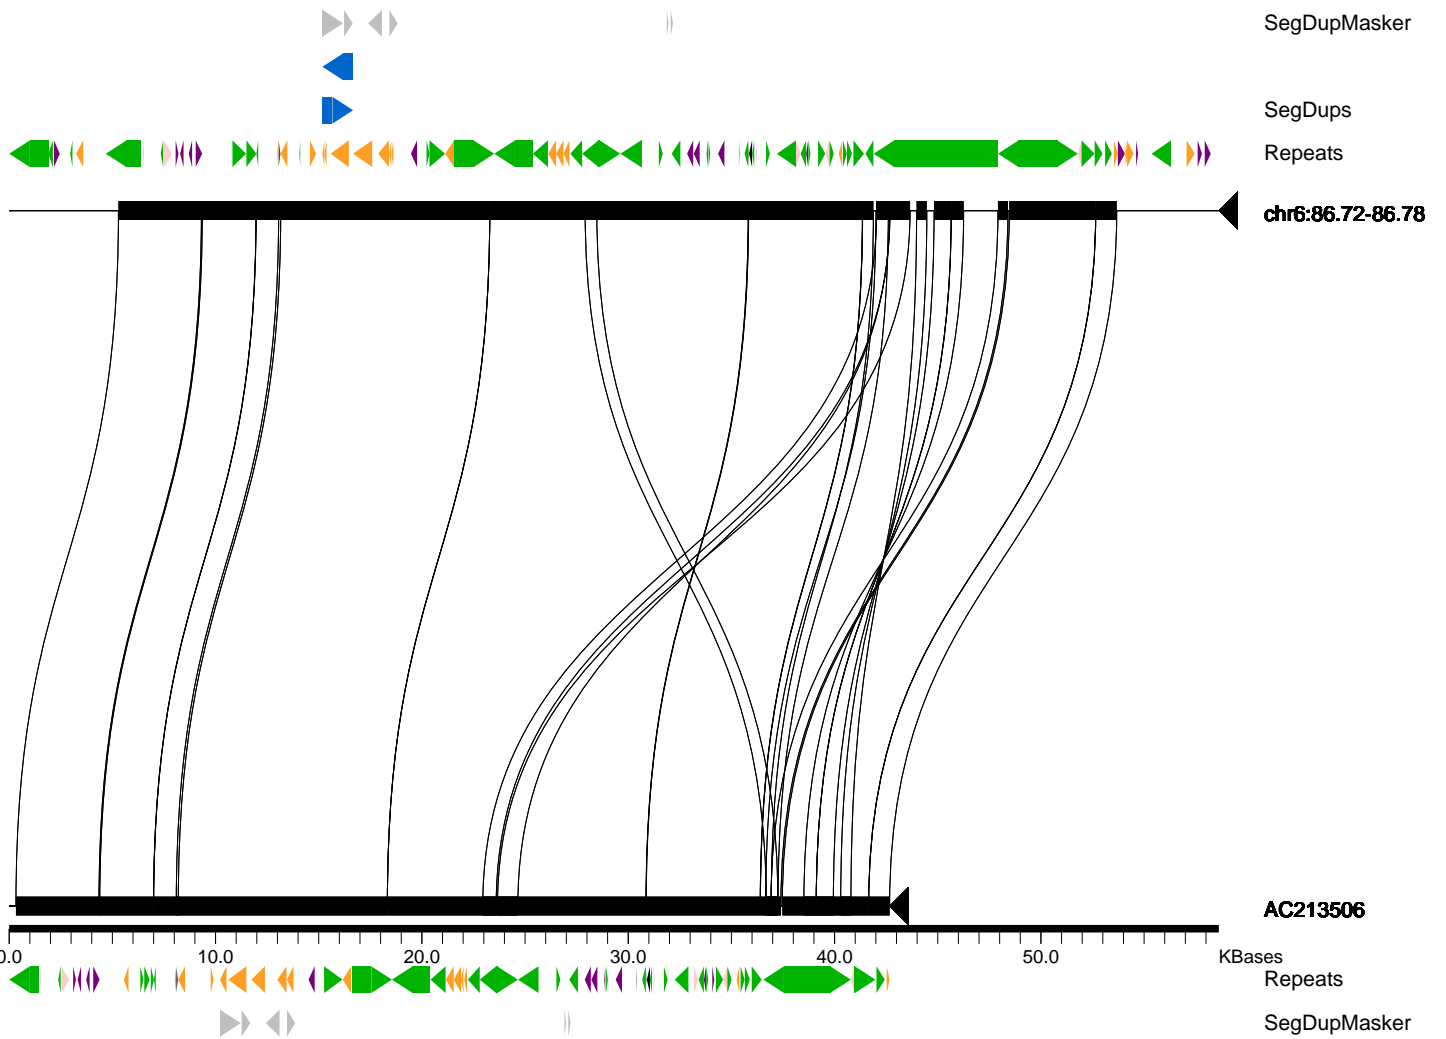

Clone: ABC8\_40885300\_G21 Accession: AC213274

ESP Prediction: B Validation: D Mechanism: RETRO

Other Simple Repeat Low Complexity DNA LTR LINE SINE

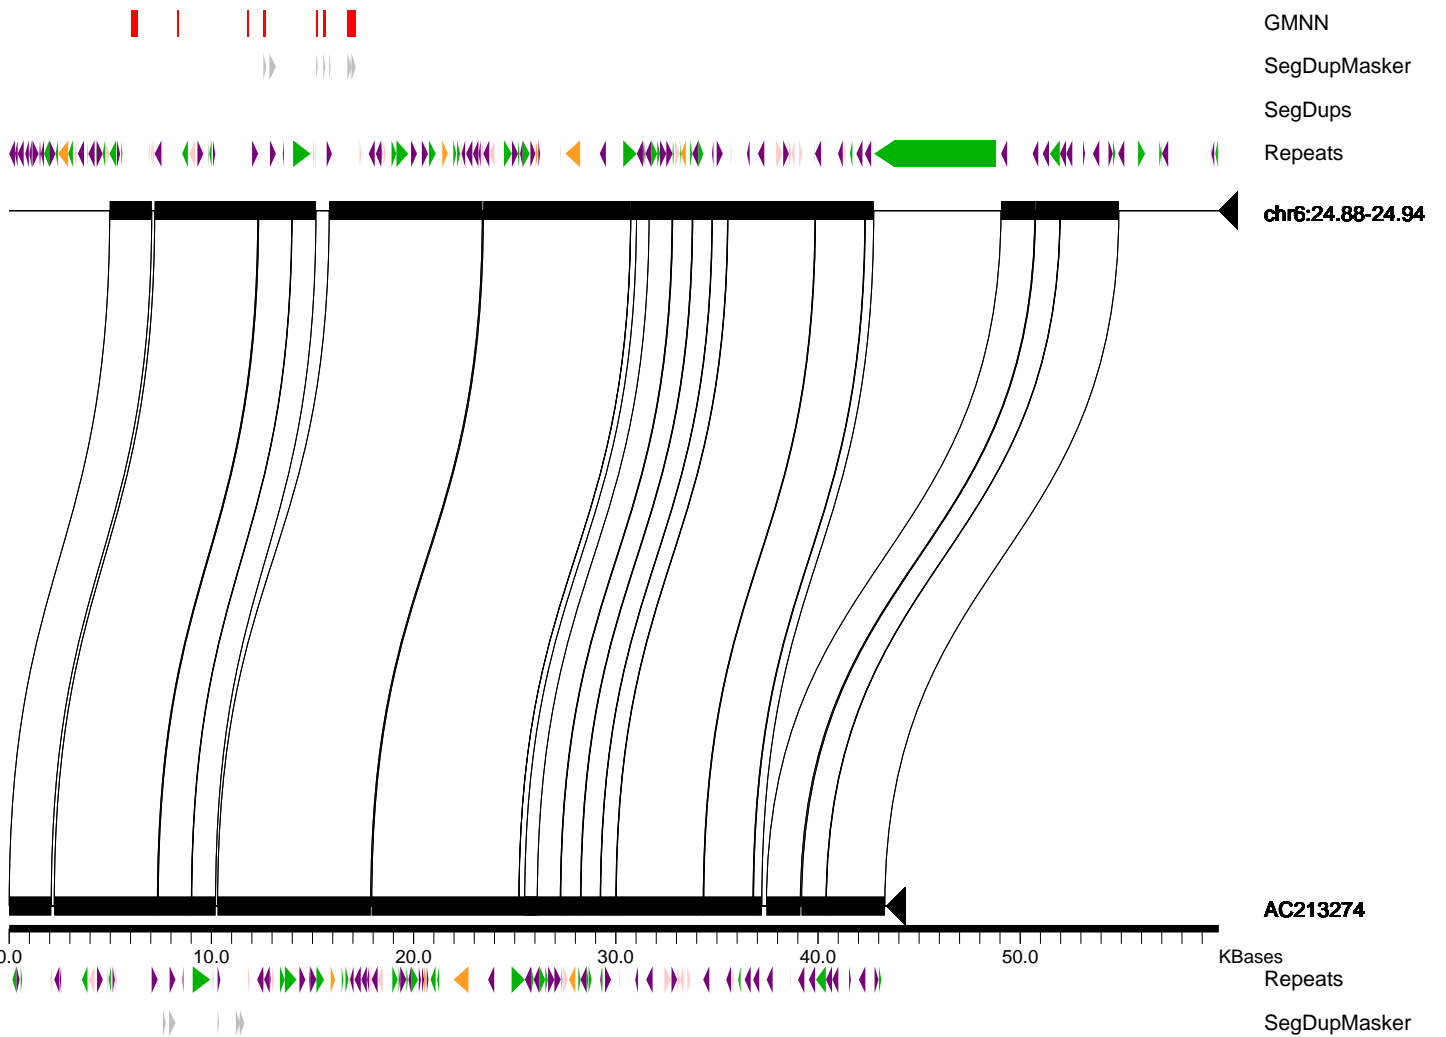

Clone: ABC8\_43242900\_O21 Accession: AC213293  
ESP Prediction: B Validation: D Mechanism: RETRO

Other Simple Repeat Low Complexity DNA LTR LINE SINE

SegDupMasker  
SegDups  
Repeats

chr4:75.96-76.02

AC213293

Repeats  
SegDupMasker

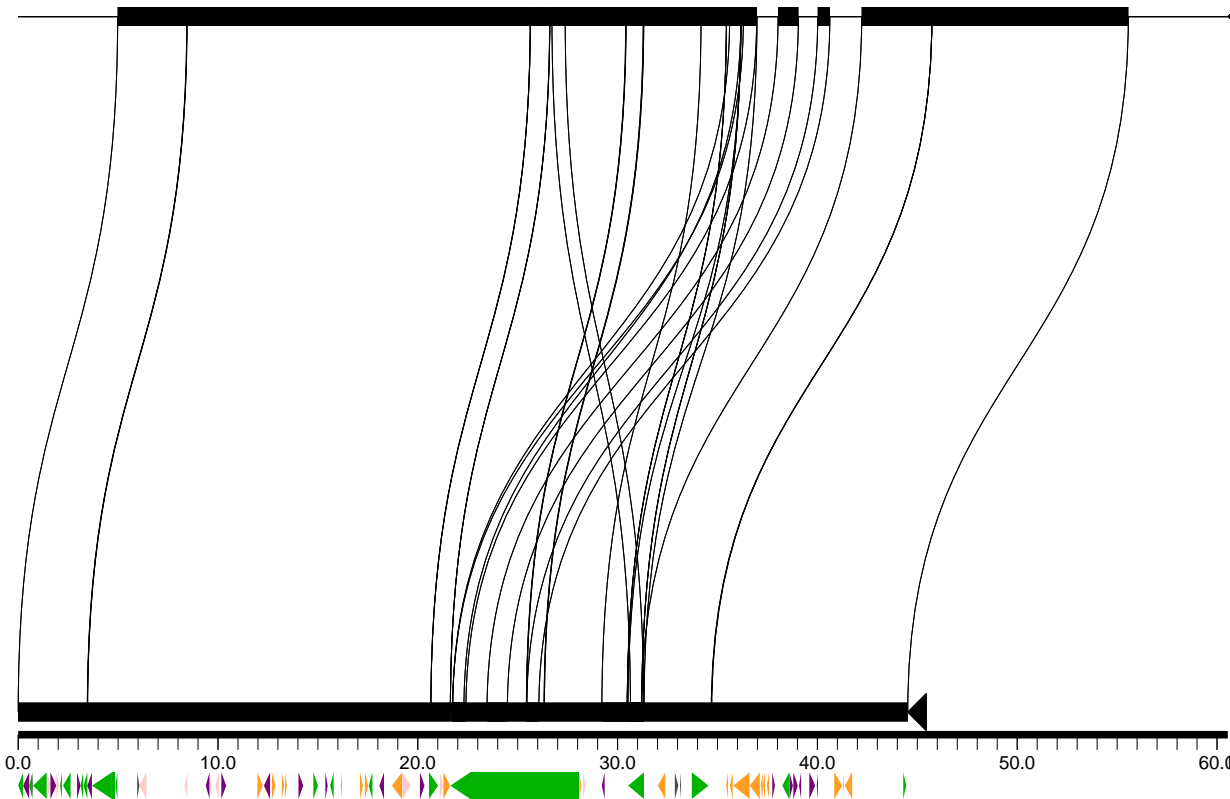

Clone: WIBR2-3396D09 Accession: AC196571

ESP Prediction: B Validation: D Mechanism: RETRO

Other Simple Repeat Low Complexity DNA LTR LINE SINE

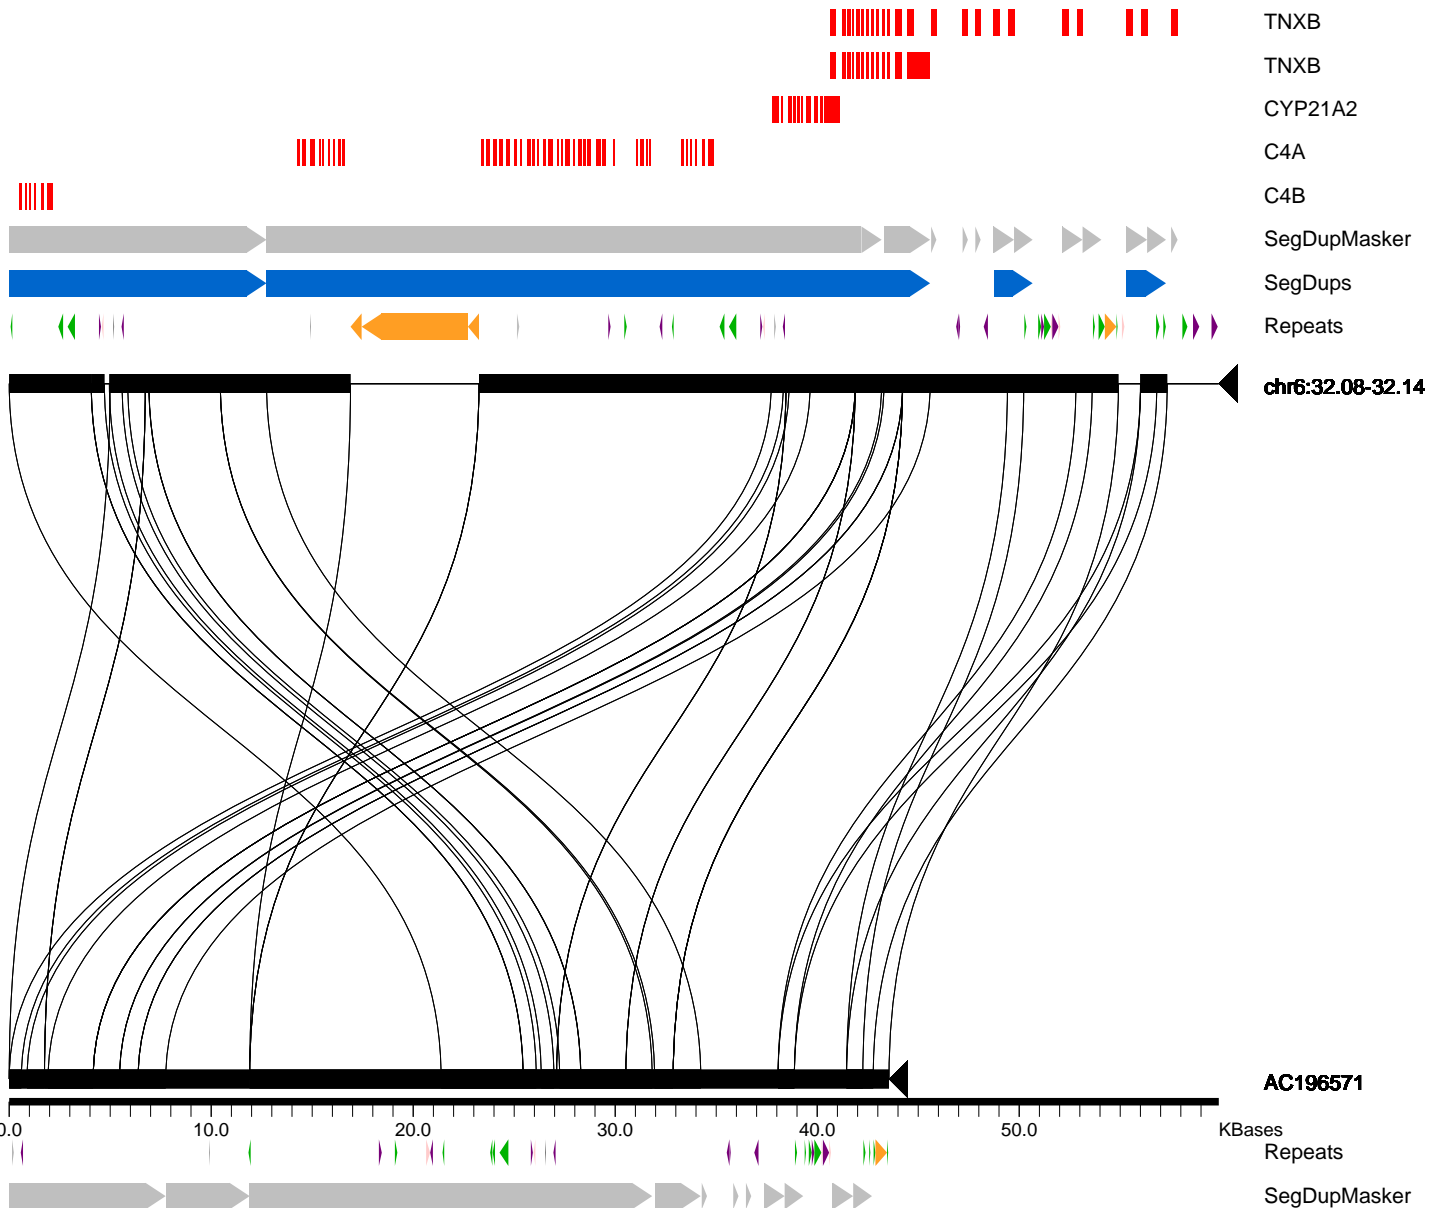

Clone: WIBR2-3492J18 Accession: AC195775

ESP Prediction: S Validation: I Mechanism: RETRO

Other Simple Repeat Low Complexity DNA LTR LINE SINE

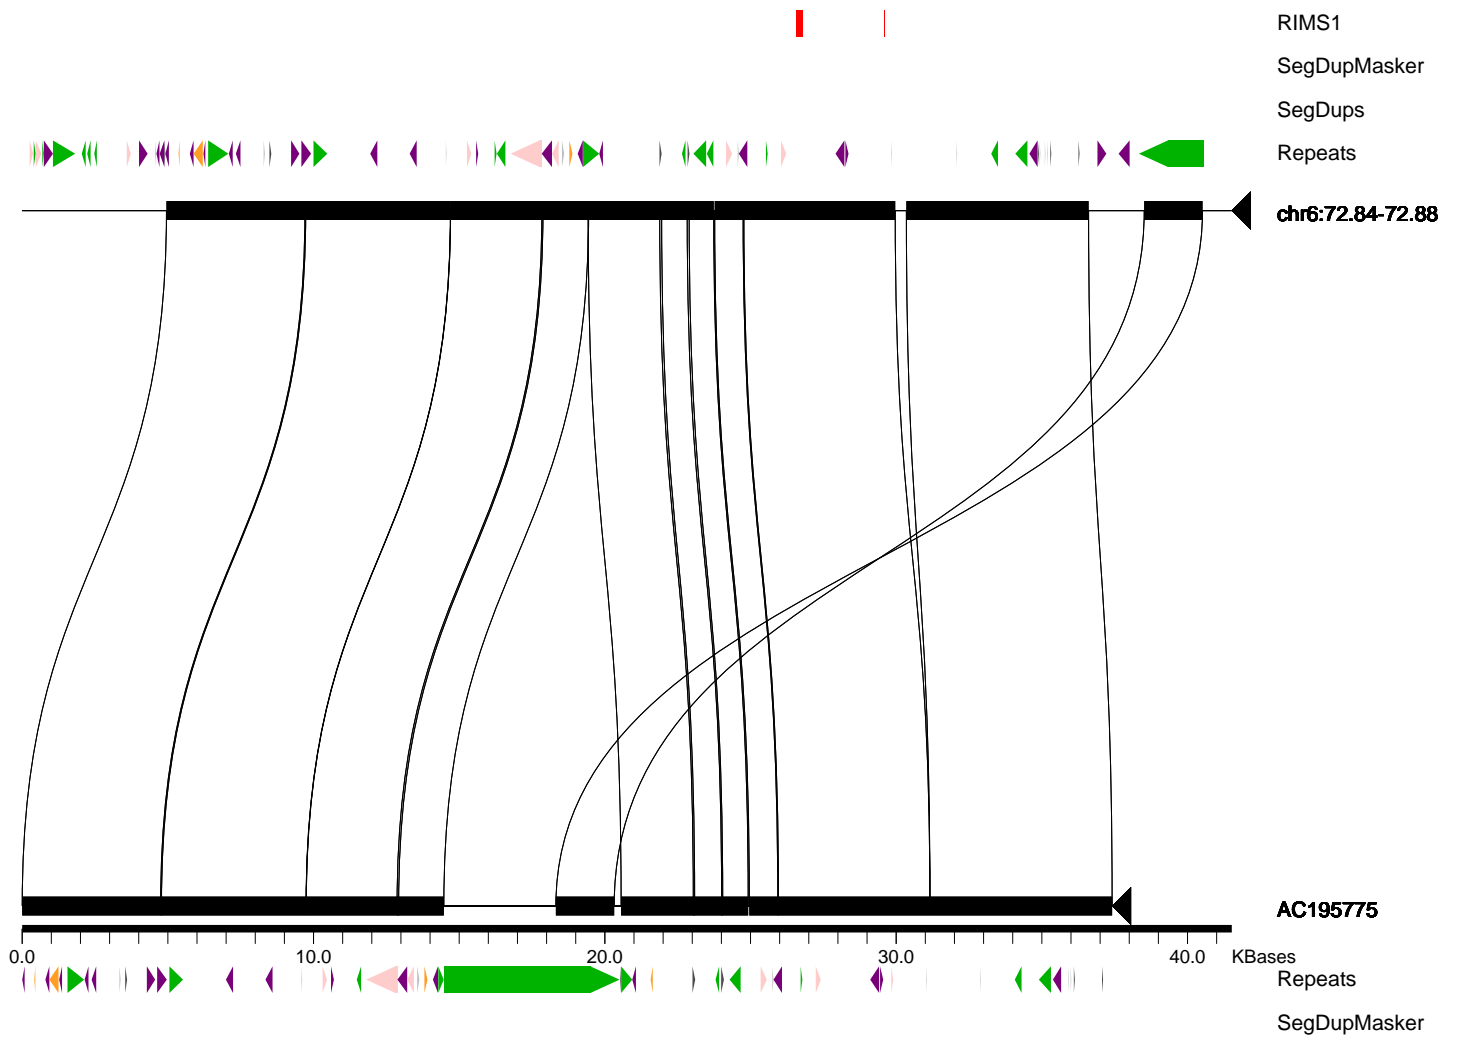

Clone: WIBR2-0402O05 Accession: AC193110

ESP Prediction: B Validation: D Mechanism: RETRO

Other Simple Repeat Low Complexity DNA LTR LINE SINE

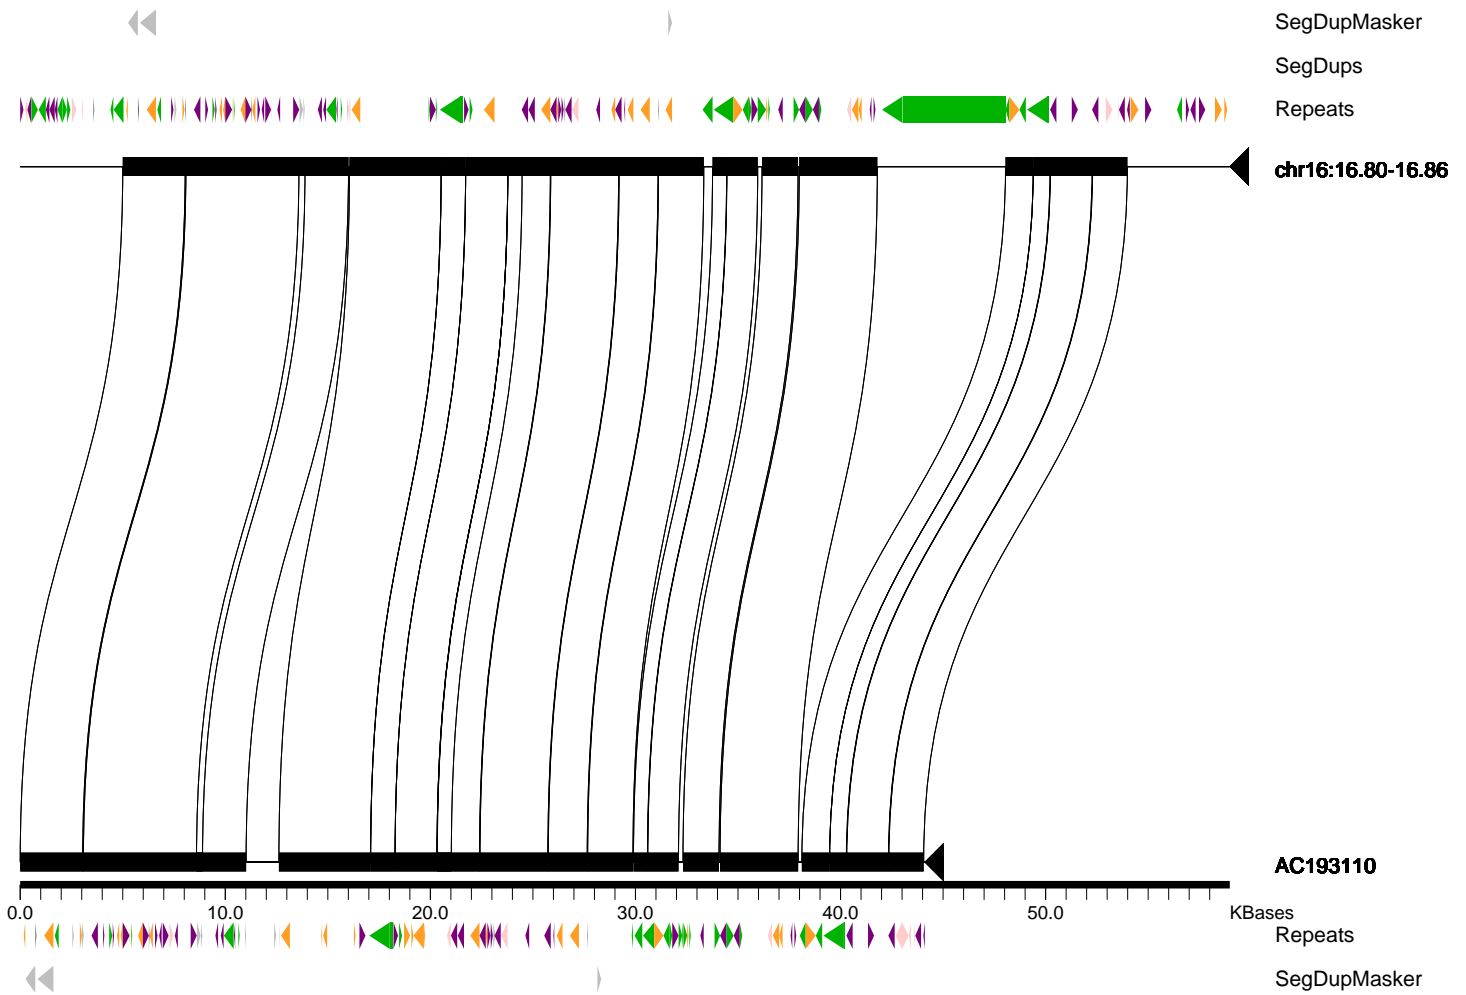



Clone: WIBR2-1515M18 Accession: AC193124

ESP Prediction: B Validation: D Mechanism: RETRO

Other Simple Repeat Low Complexity DNA LTR LINE SINE

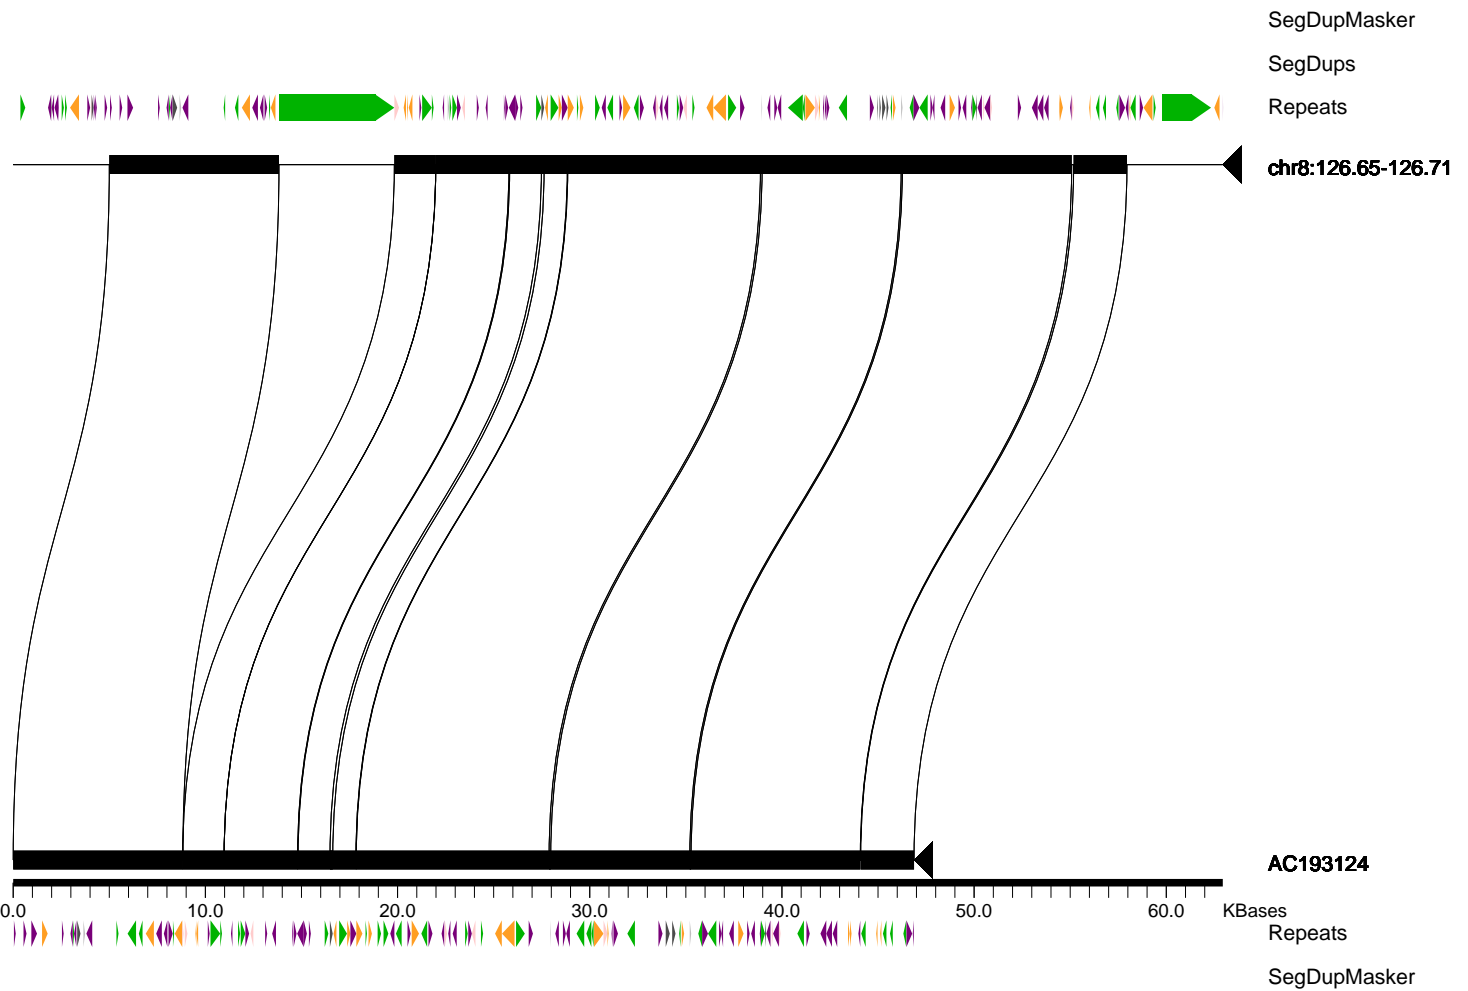

Clone: WIBR2-1079I20 Accession: AC193119

ESP Prediction: B Validation: D Mechanism: RETRO

Other Simple Repeat Low Complexity DNA LTR LINE SINE

SegDupMasker

SegDups

Repeats

chr8:135.13-135.19

AC193119

Repeats

SegDupMasker

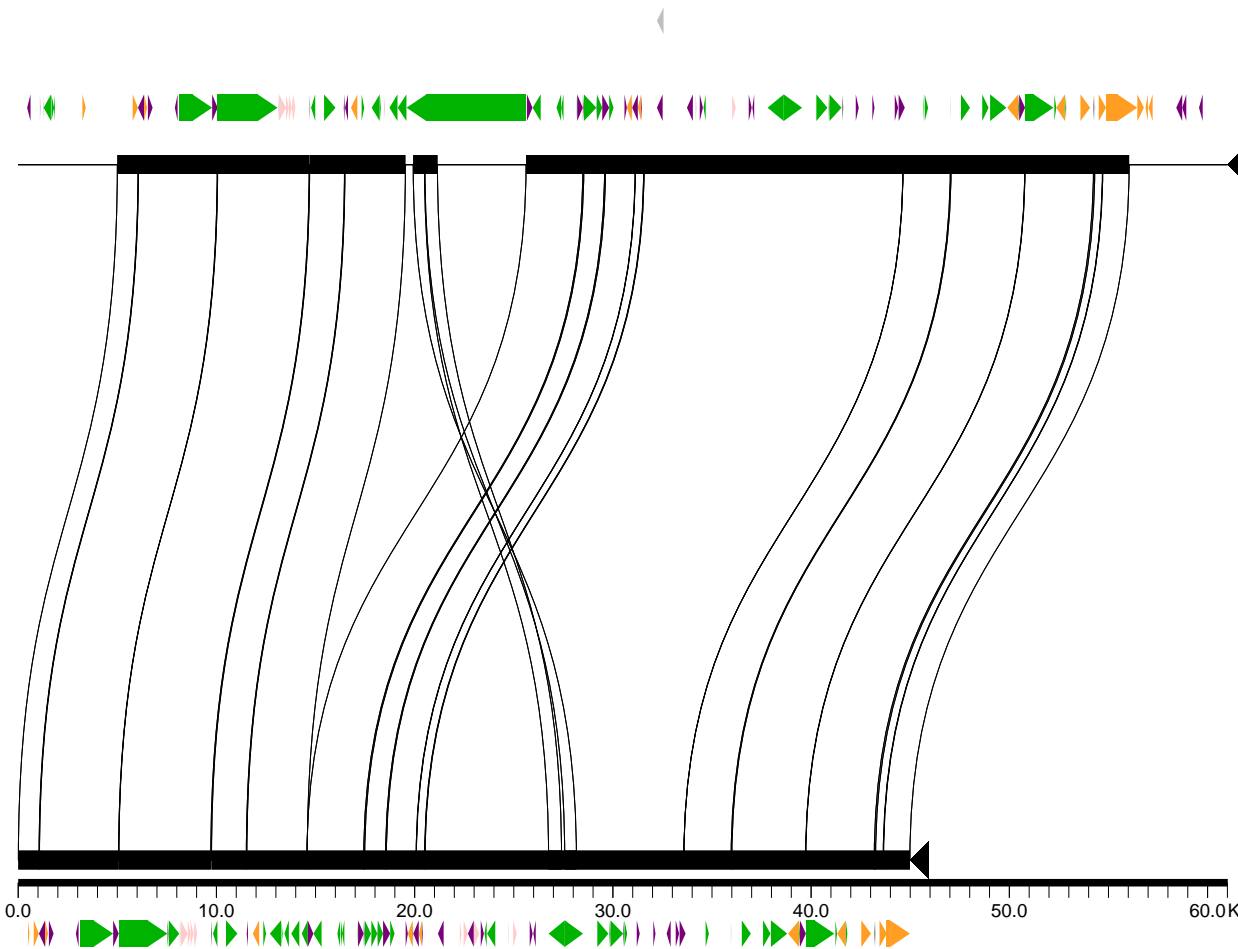

Clone: WIBR2-2182N08 Accession: AC196527

ESP Prediction: B Validation: D Mechanism: RETRO

Other Simple Repeat Low Complexity DNA LTR LINE SINE

SegDupMasker

SegDups

Repeats

chr5:103.85-103.91

AC196527

Repeats

SegDupMasker

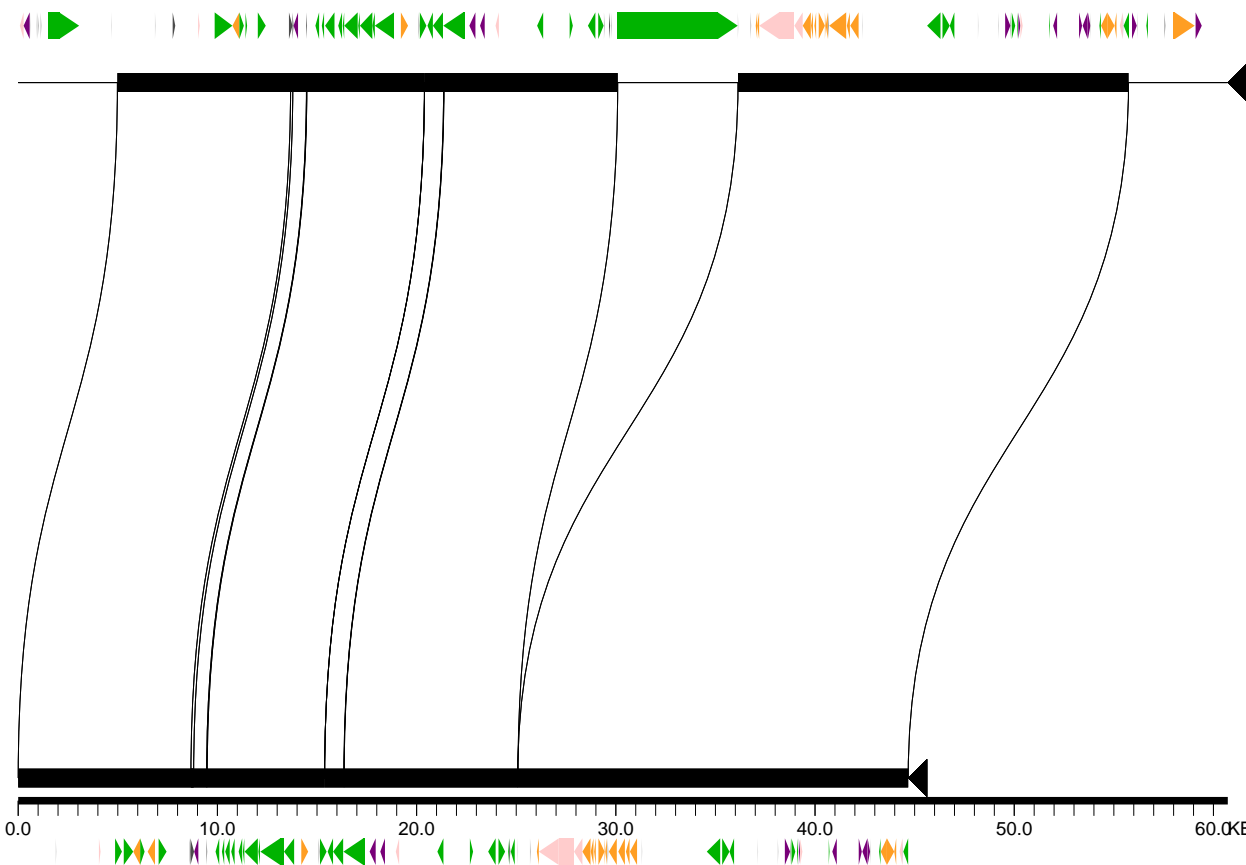

Clone: WIBR2-1732E23 Accession: AC193127

ESP Prediction: B Validation: D Mechanism: RETRO

Other Simple Repeat Low Complexity DNA LTR LINE SINE

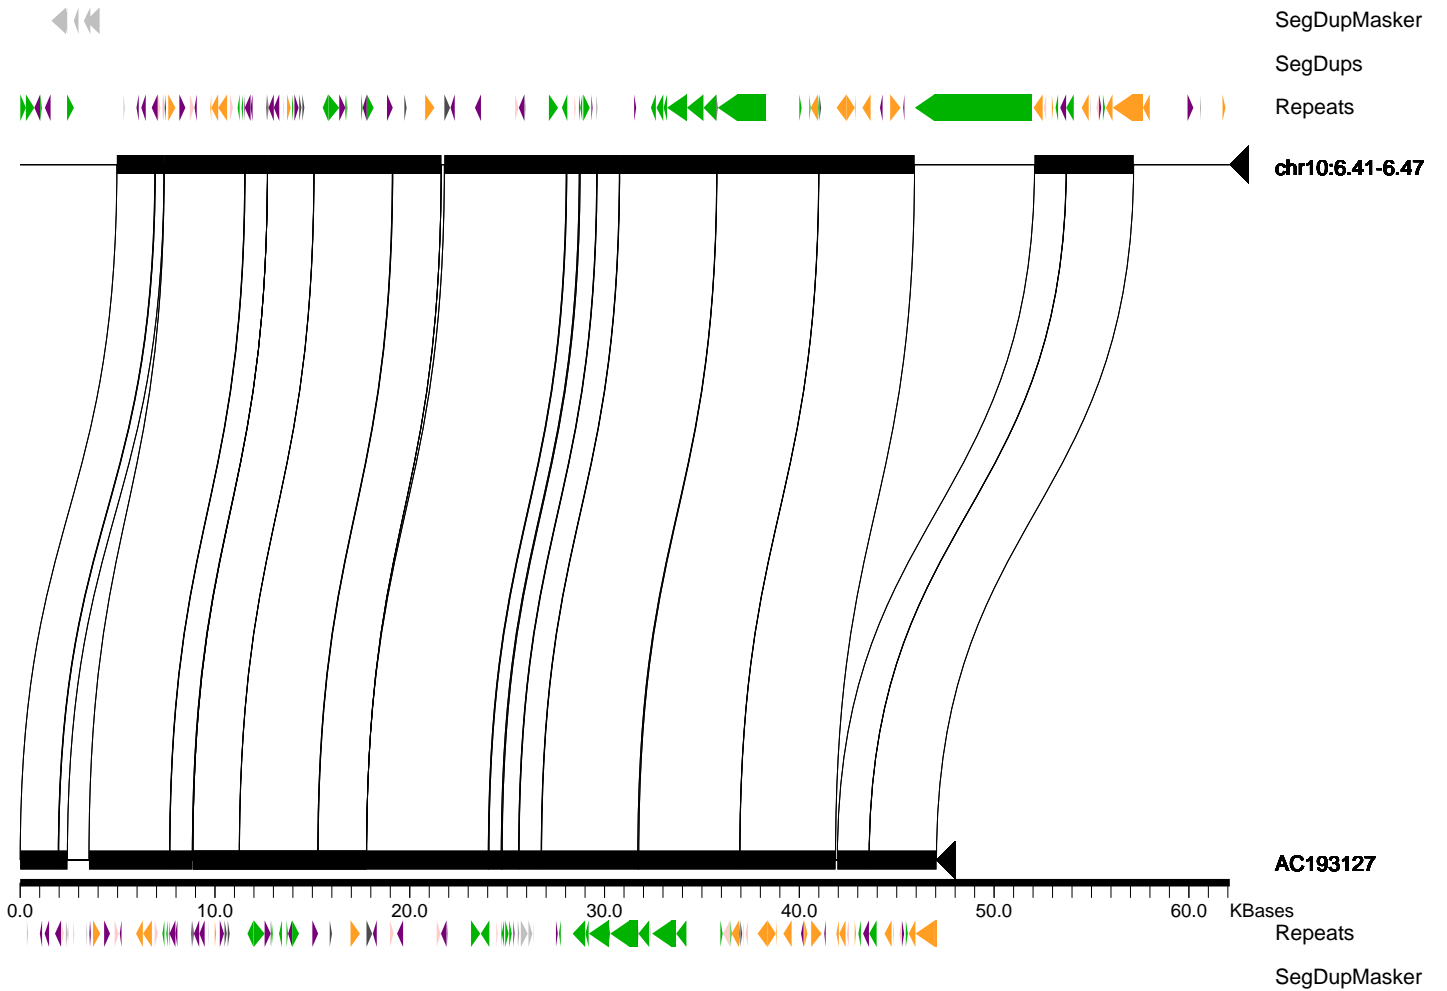

Clone: WIBR2-2240D15 Accession: AC193136

ESP Prediction: B Validation: D Mechanism: RETRO

Other Simple Repeat Low Complexity DNA LTR LINE SINE

SegDupMasker

SegDups

Repeats

chr15:52.98-53.04

AC193136

Repeats

SegDupMasker

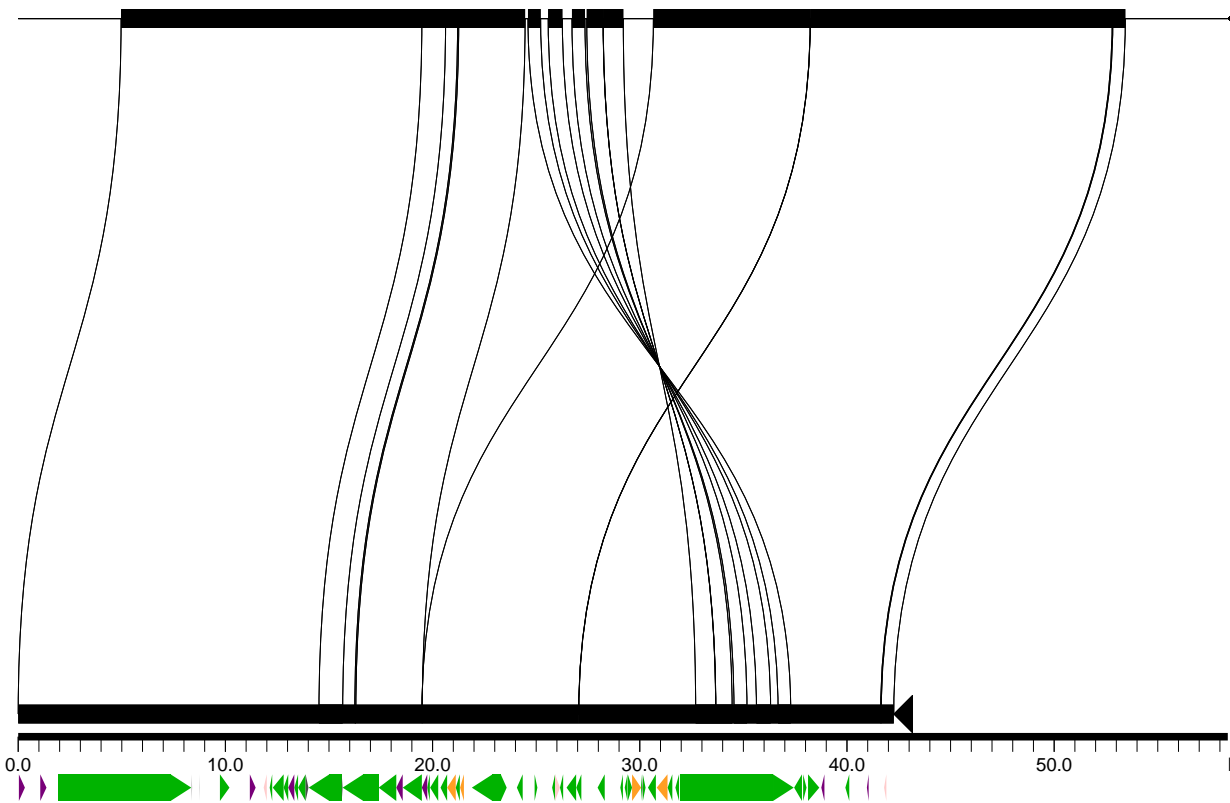

Clone: WIBR2-2944C15 Accession: AC193157

ESP Prediction: B Validation: D Mechanism: RETRO

Other Simple Repeat Low Complexity DNA LTR LINE SINE

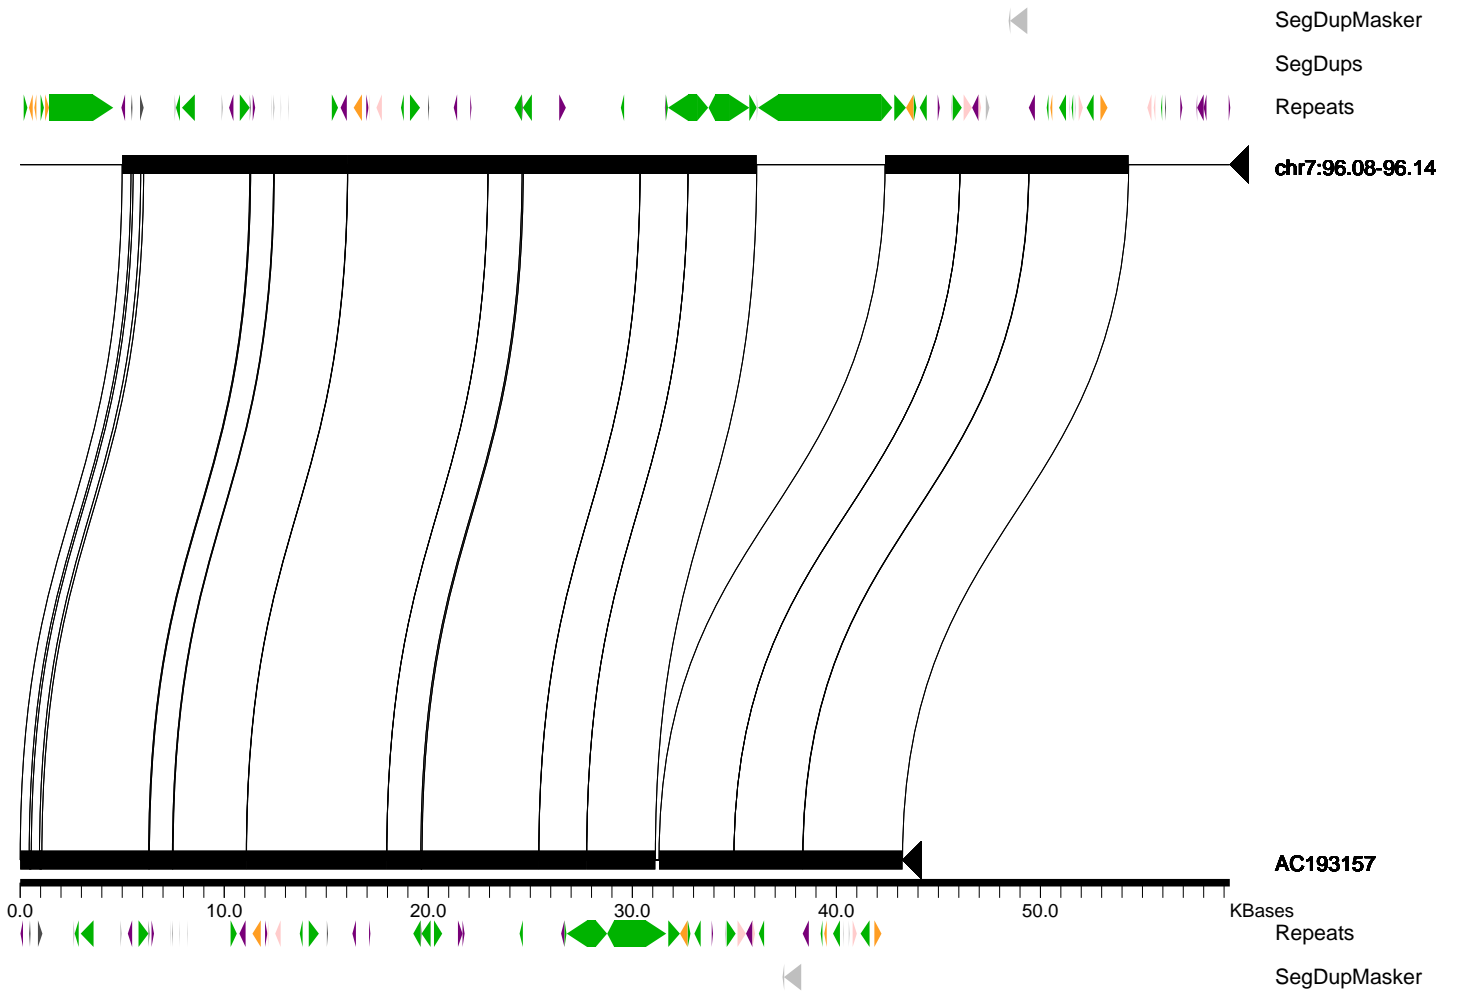

Clone: WIBR2-2859B17 Accession: AC193155

ESP Prediction: S Validation: I Mechanism: RETRO

Other Simple Repeat Low Complexity DNA LTR LINE SINE

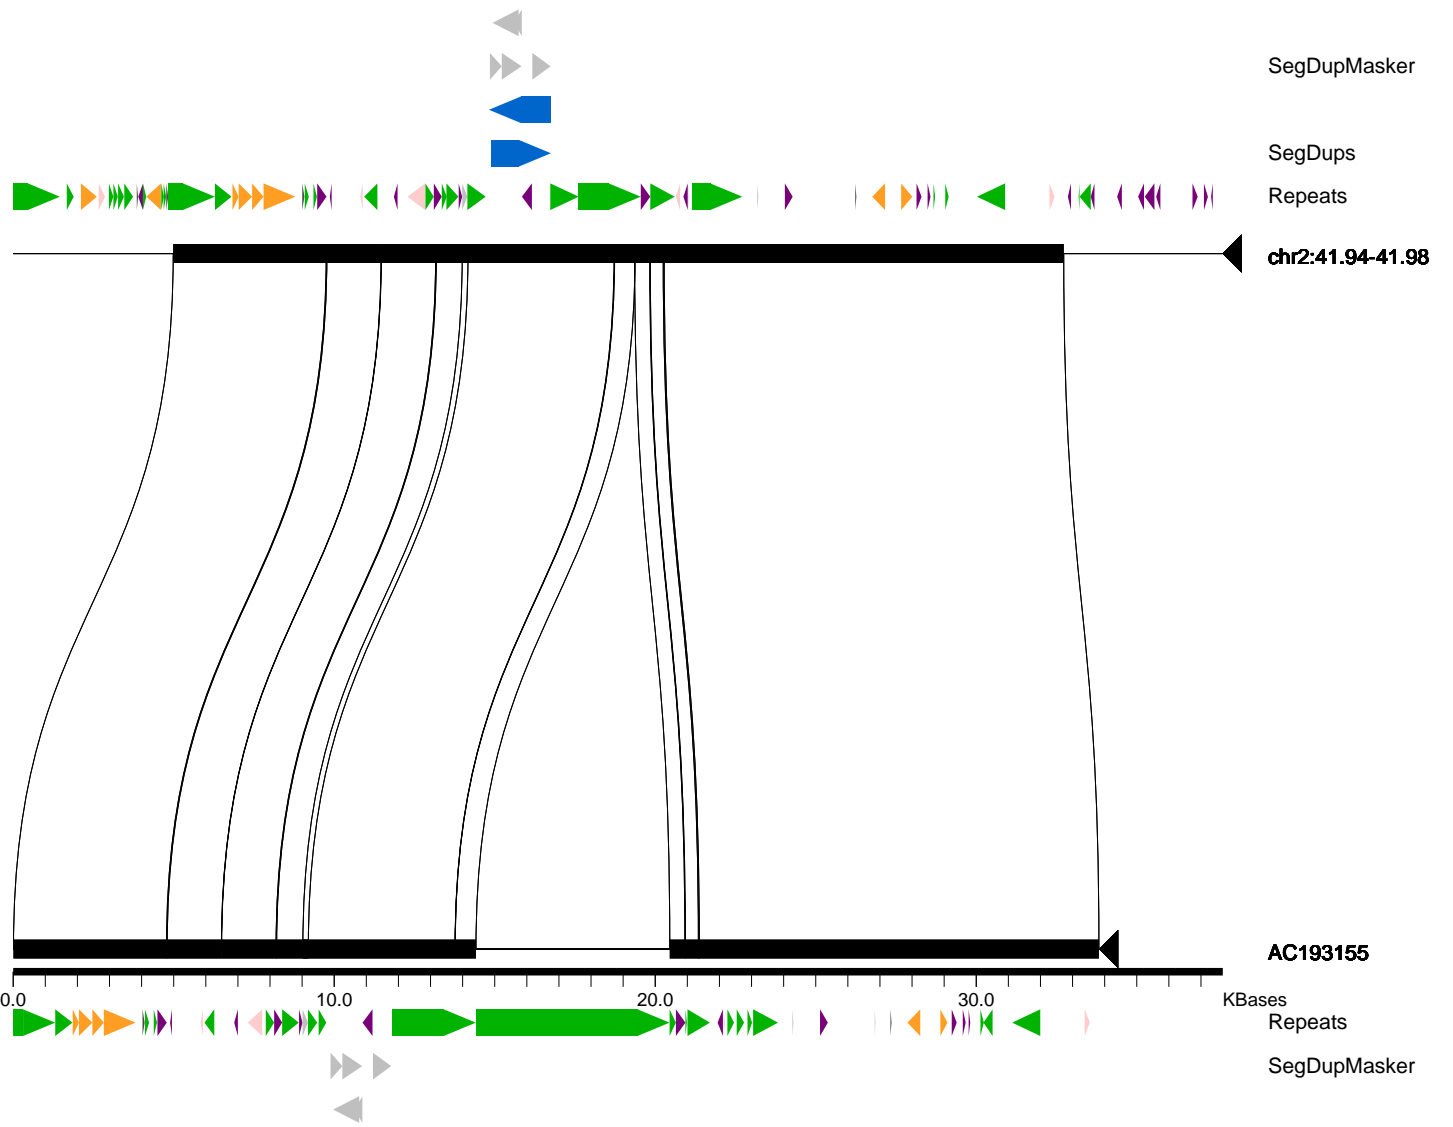

Clone: WIBR2-3154I06 Accession: AC196548

ESP Prediction: B Validation: D Mechanism: RETRO

Other Simple Repeat Low Complexity DNA LTR LINE SINE

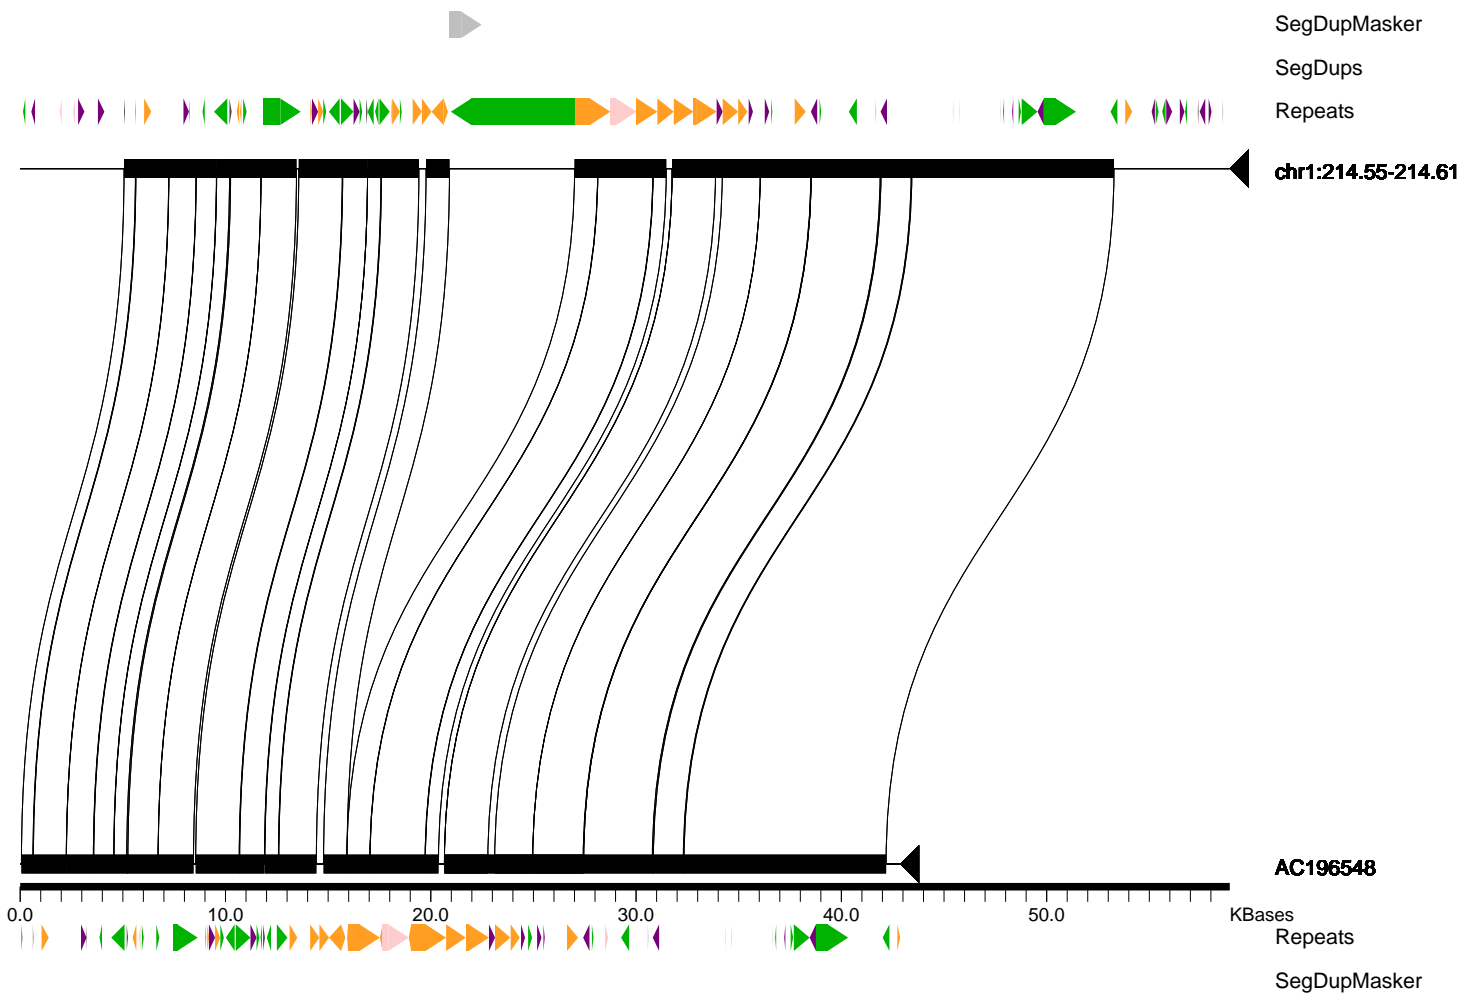



Clone: ABC10\_45527100\_D2 Accession: AC203612

ESP Prediction: S Validation: I Mechanism: VNTR

Other Simple Repeat Low Complexity DNA LTR LINE SINE

SegDupMasker

SegDups

Repeats

chr6:0.77-0.82

AC203612

KBases

Repeats

SegDupMasker

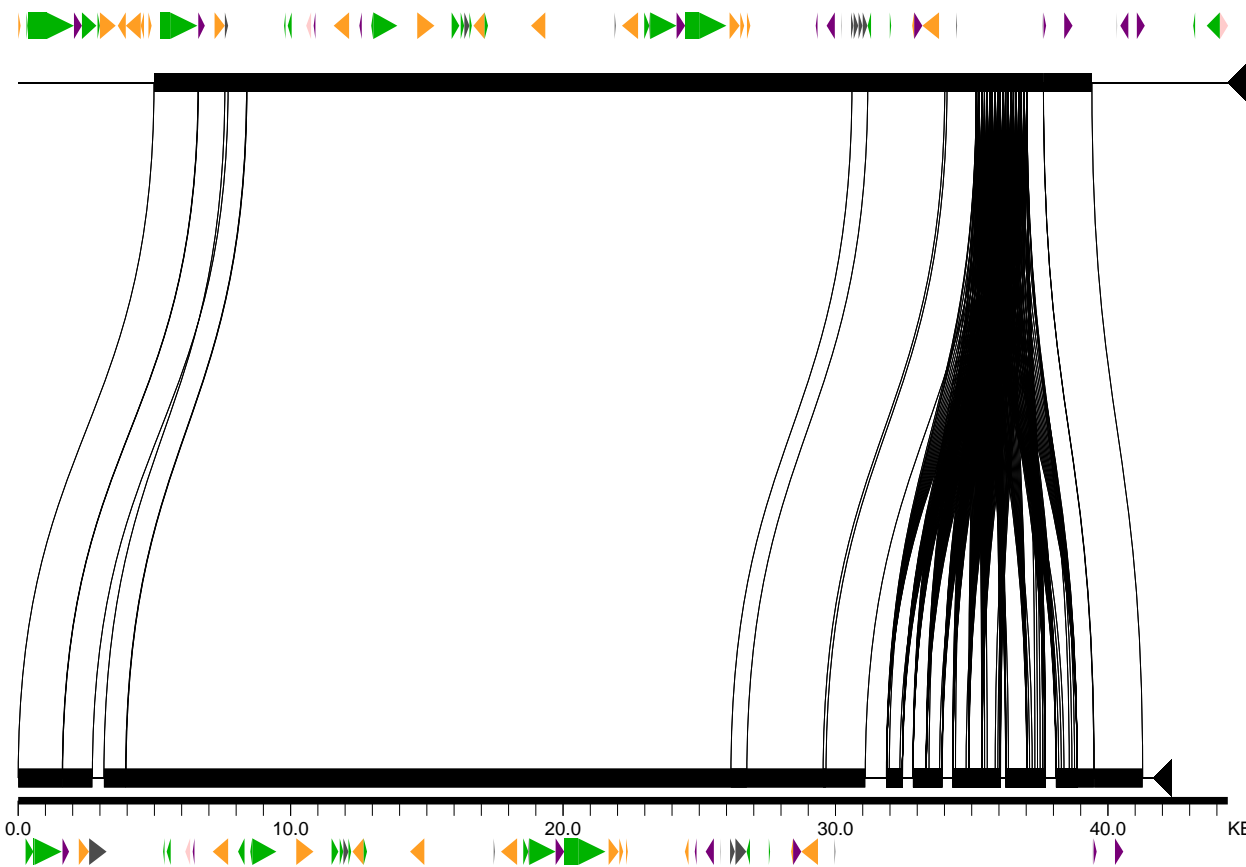

Clone: ABC9\_44022600\_H13 Accession: AC206895

ESP Prediction: S Validation: I Mechanism: VNTR

Other Simple Repeat Low Complexity DNA LTR LINE SINE

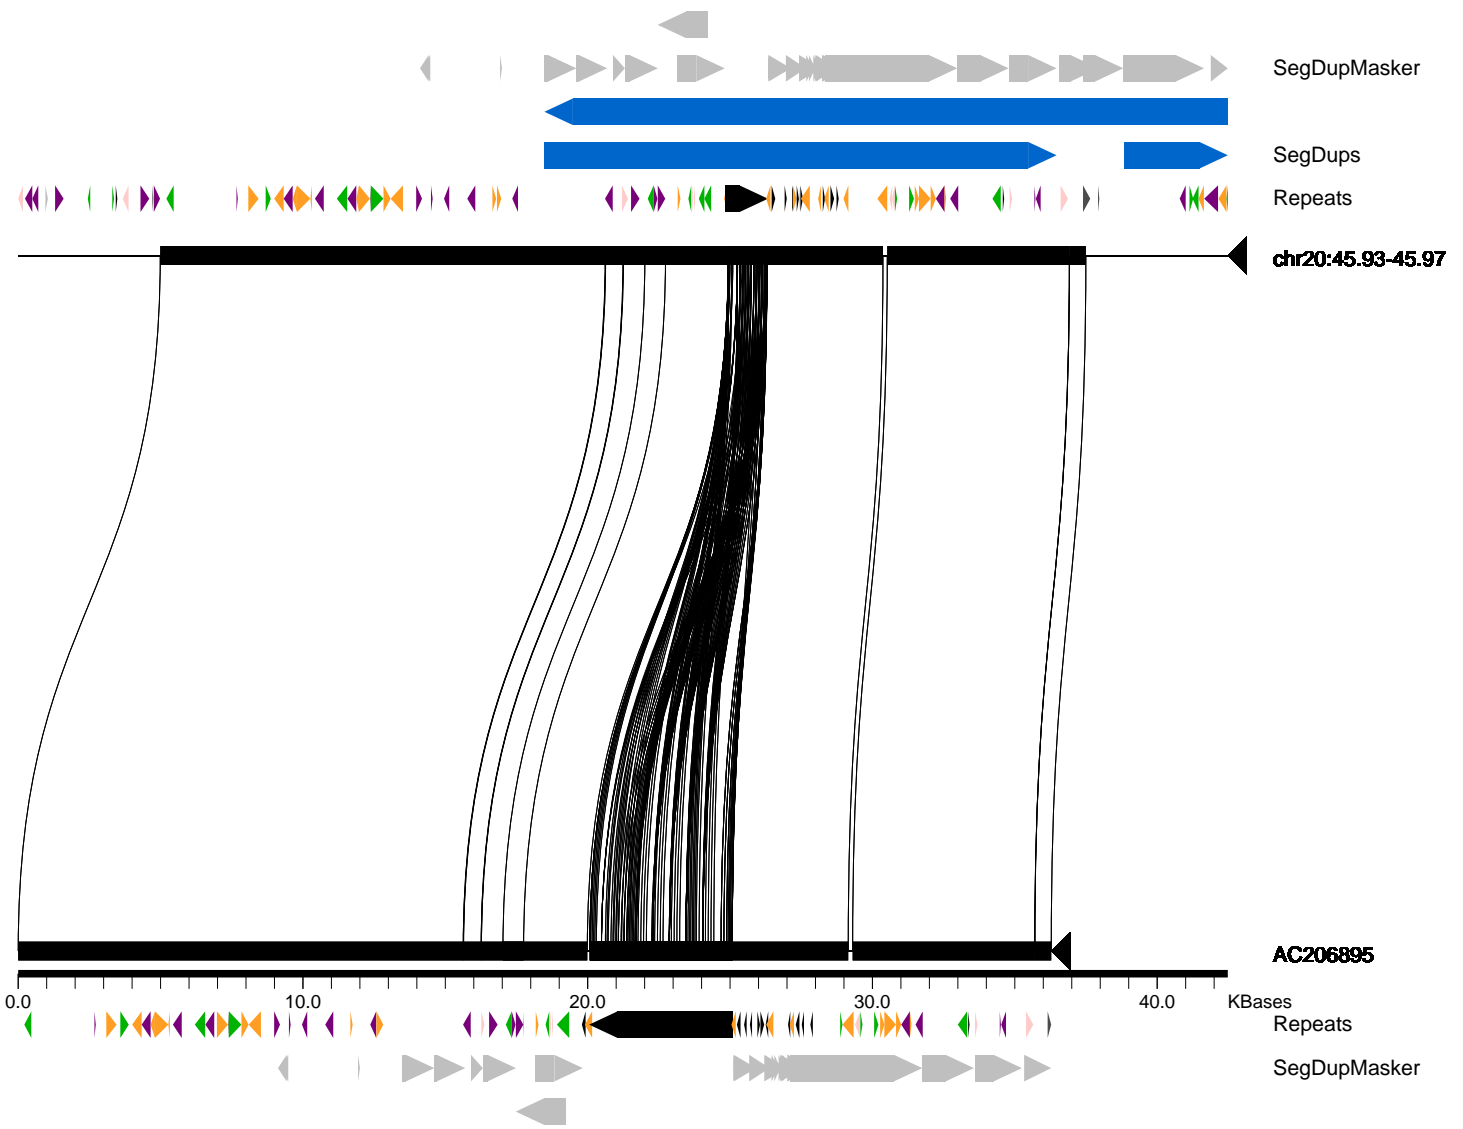

Clone: ABC10\_44524100\_P22 Accession: AC203626

ESP Prediction: S Validation: I Mechanism: VNTR

Other Simple Repeat Low Complexity DNA LTR LINE SINE

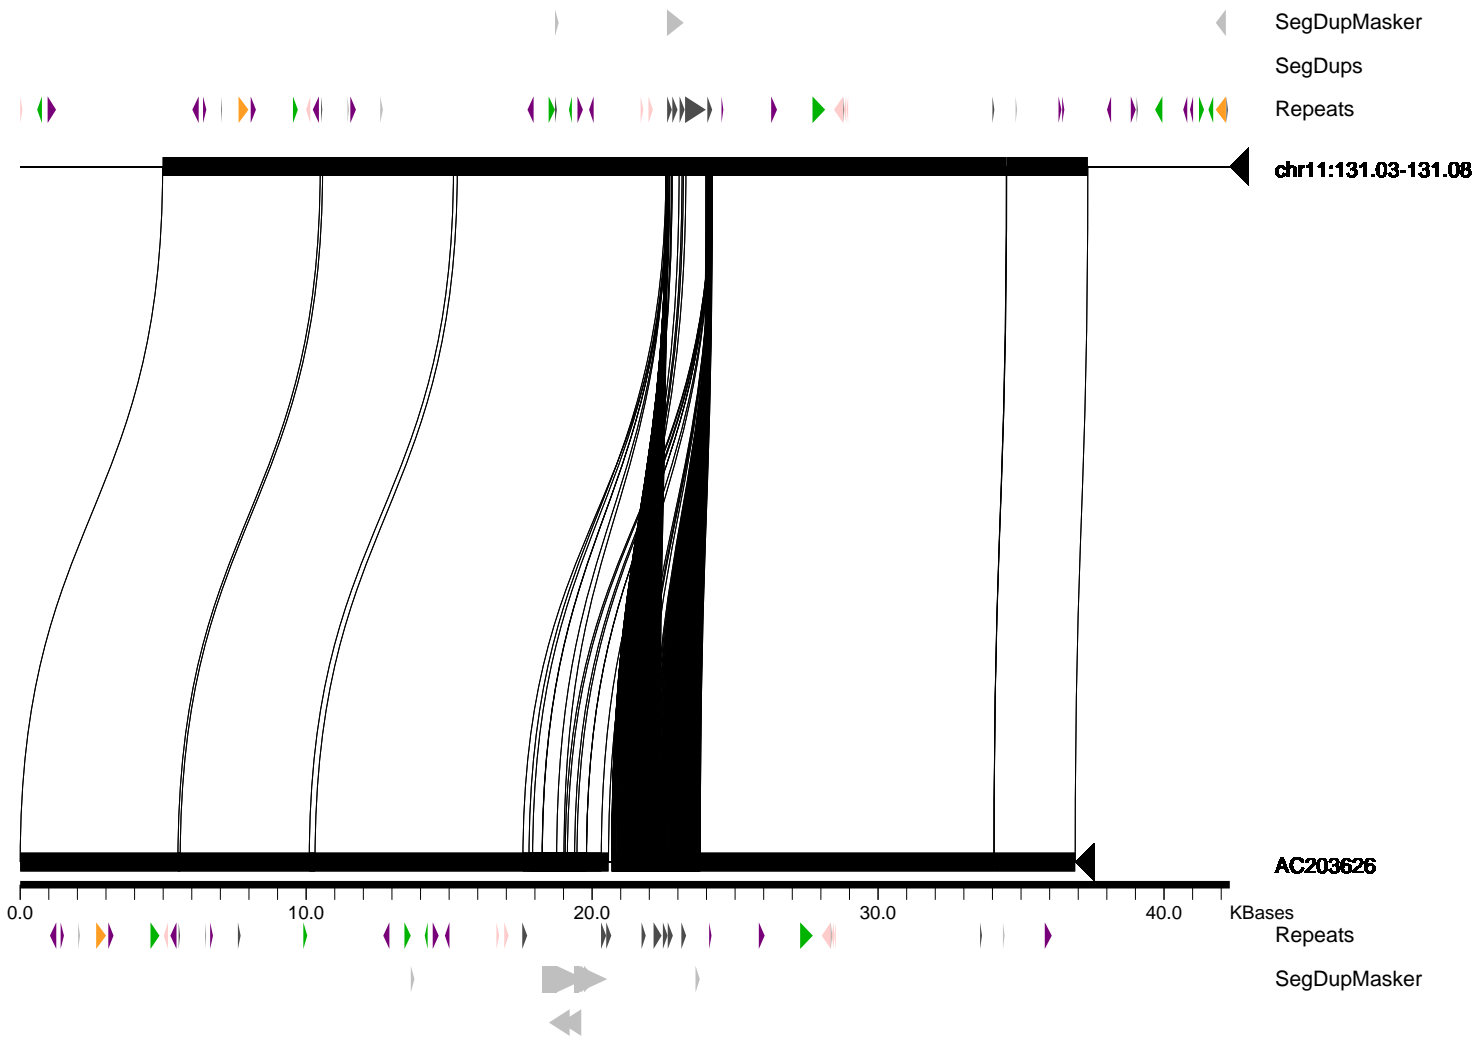

Clone: ABC7\_42399900\_C19 Accession: AC213221  
ESP Prediction: S Validation: U Mechanism: UNKNOWN

Other Simple Repeat Low Complexity DNA LTR LINE SINE

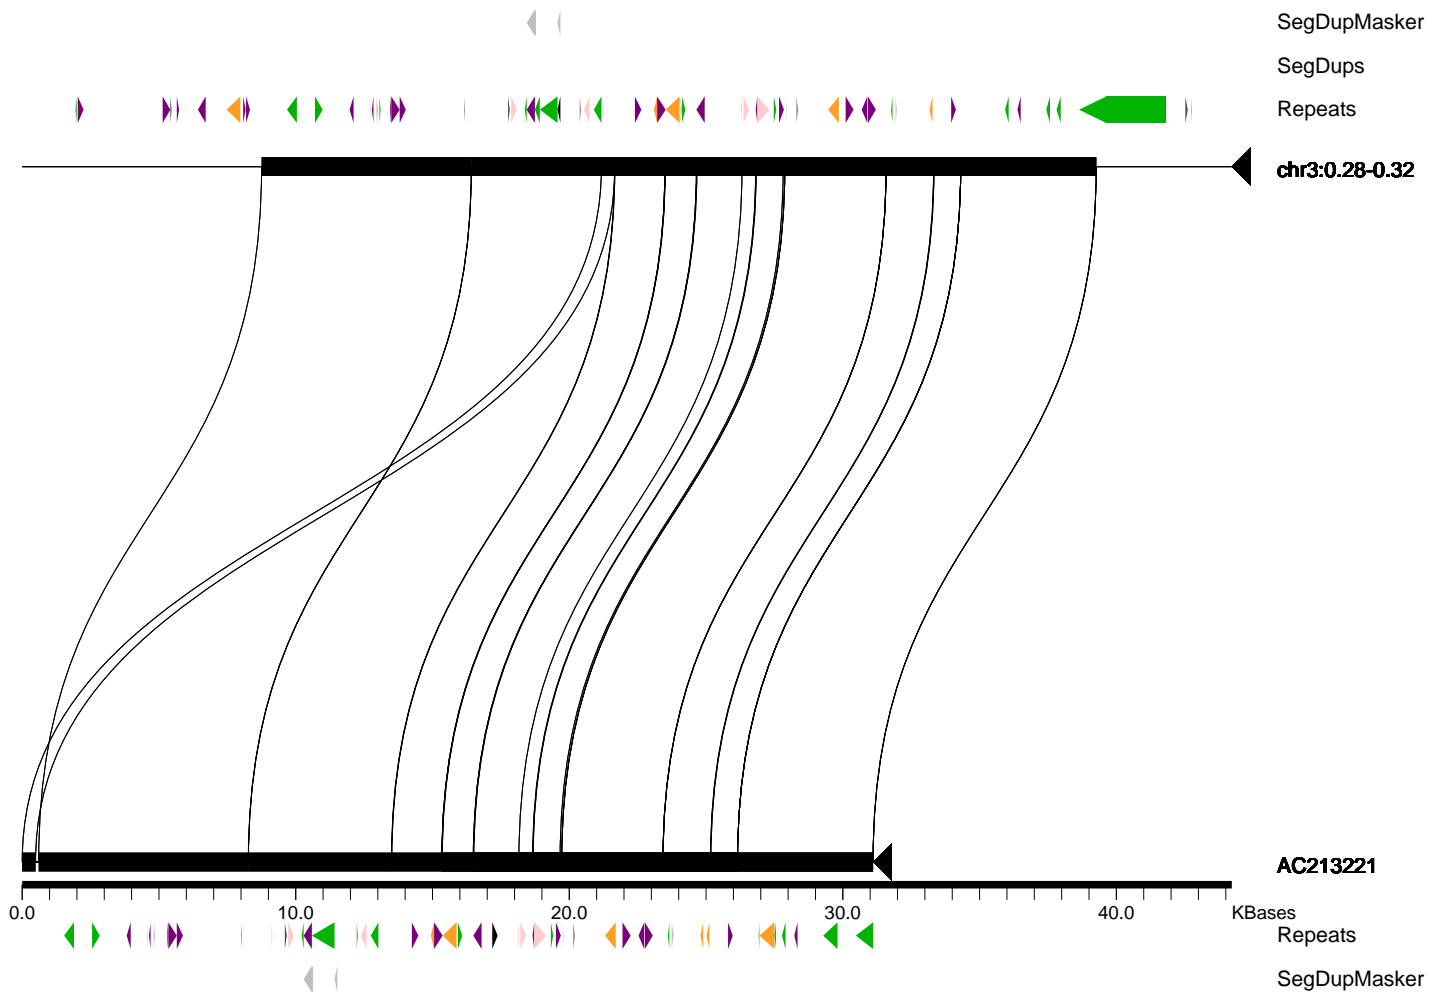

Clone: ABC7\_42412100\_F4 Accession: AC213286  
ESP Prediction: B Validation: U Mechanism: VNTR

Other Simple Repeat Low Complexity DNA LTR LINE SINE

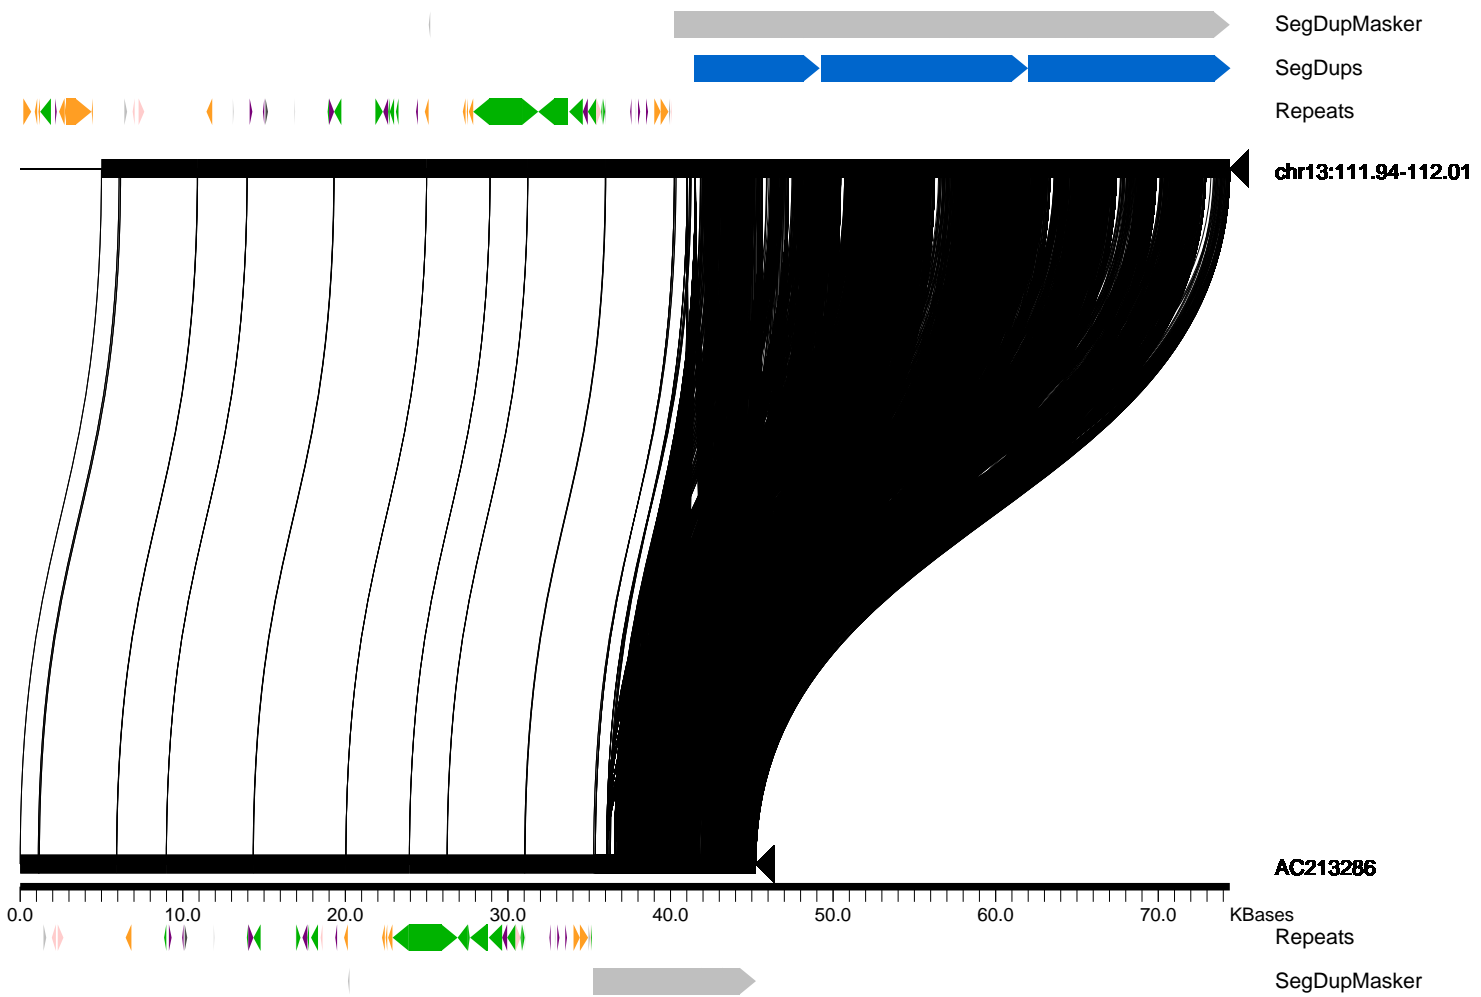

Clone: WIBR2-3316B13 Accession: AC196570

ESP Prediction: S Validation: U Mechanism: TANDEM SD

Other Simple Repeat Low Complexity DNA LTR LINE SINE

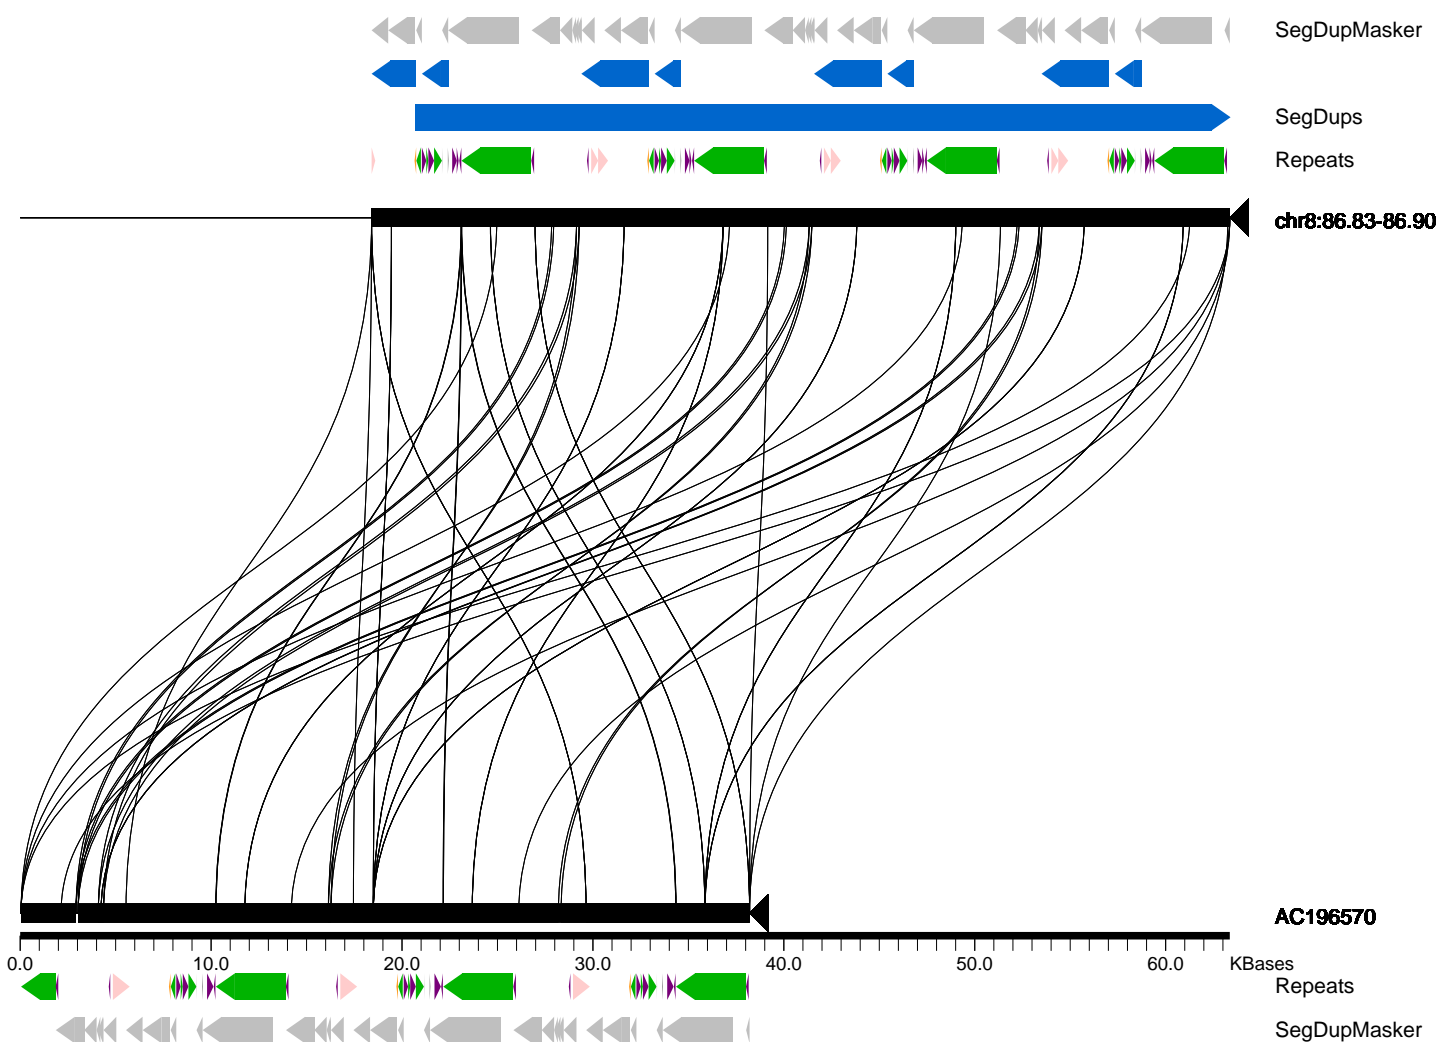

Clone: WIBR2-3182J07 Accession: AC193164

ESP Prediction: B Validation: D Mechanism: SD

Other Simple Repeat Low Complexity DNA LTR LINE SINE

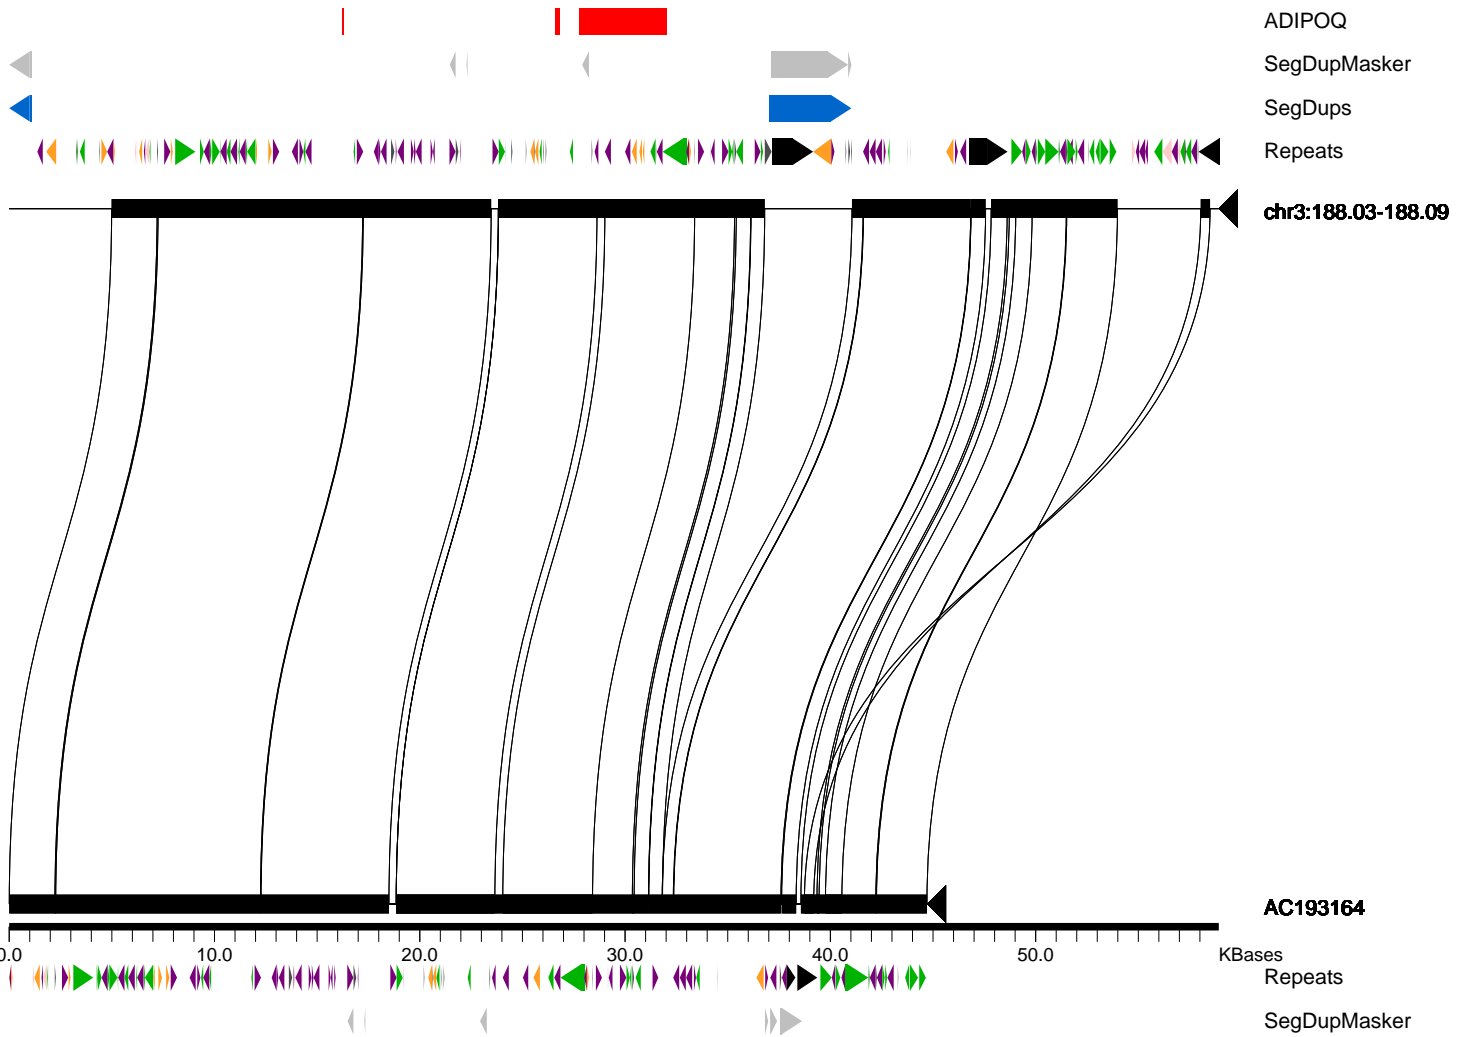

Clone: WIBR2-3070I01 Accession: AC193084

ESP Prediction: S Validation: I Mechanism: VNTR

Other Simple Repeat Low Complexity DNA LTR LINE SINE

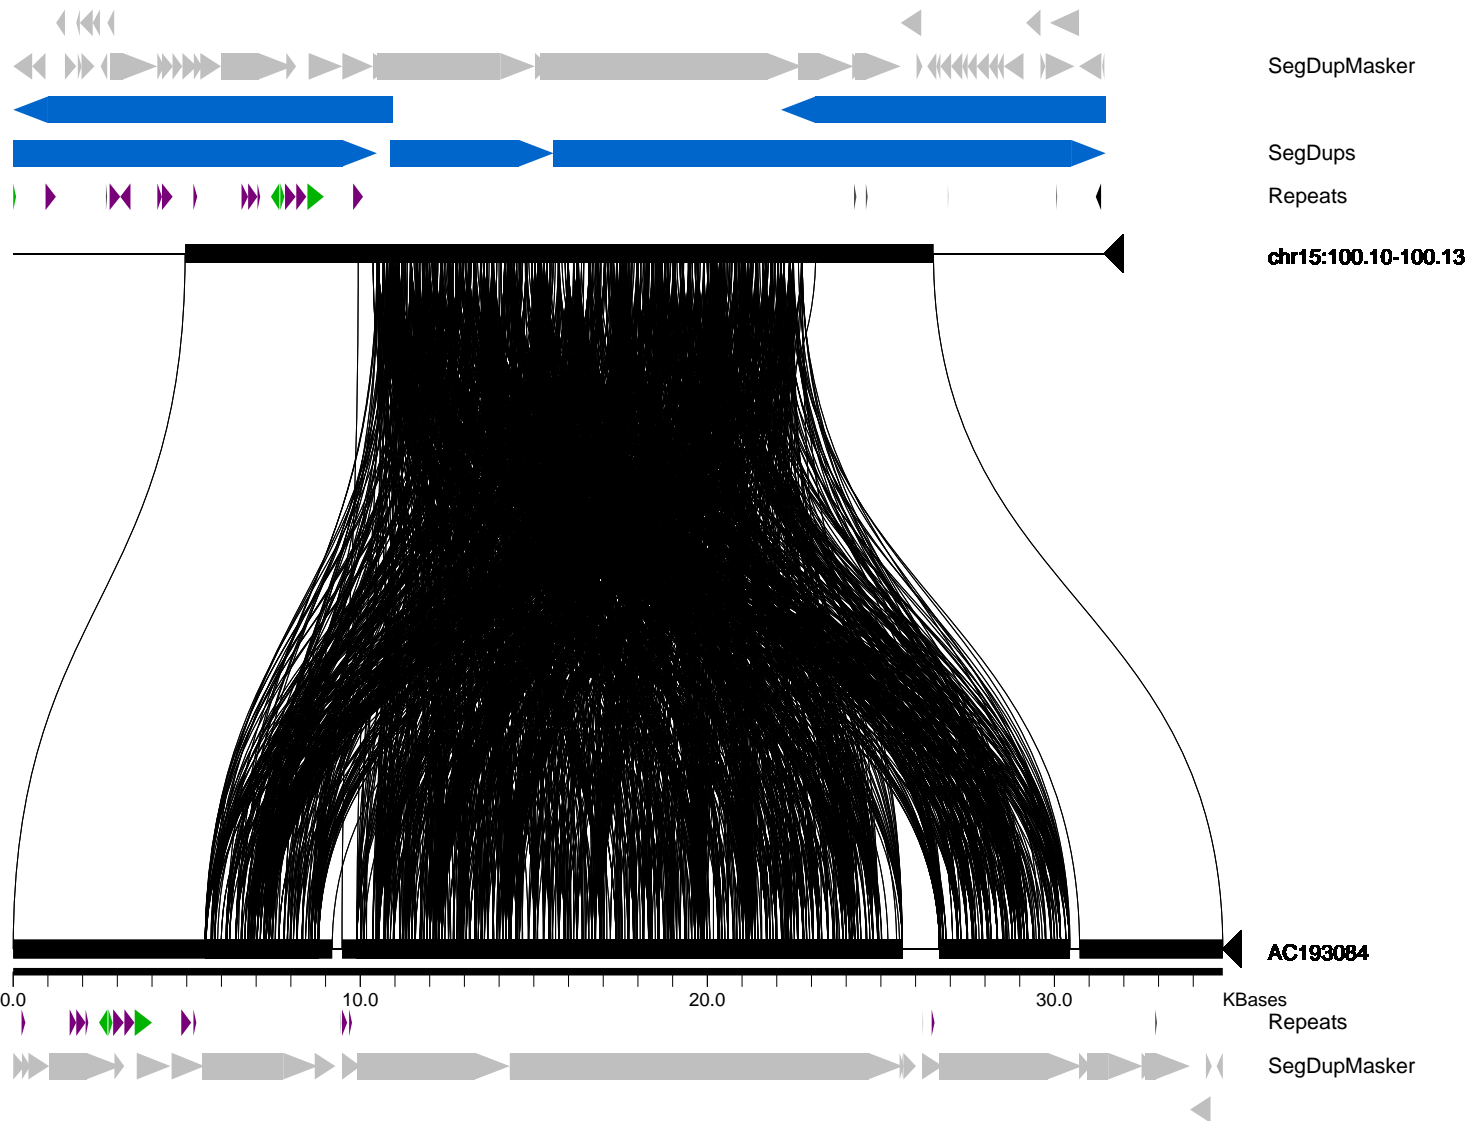



Clone: WIBR2-3382N04 Accession: AC158339

ESP Prediction: B Validation: D Mechanism: VNTR

Other Simple Repeat Low Complexity DNA LTR LINE SINE

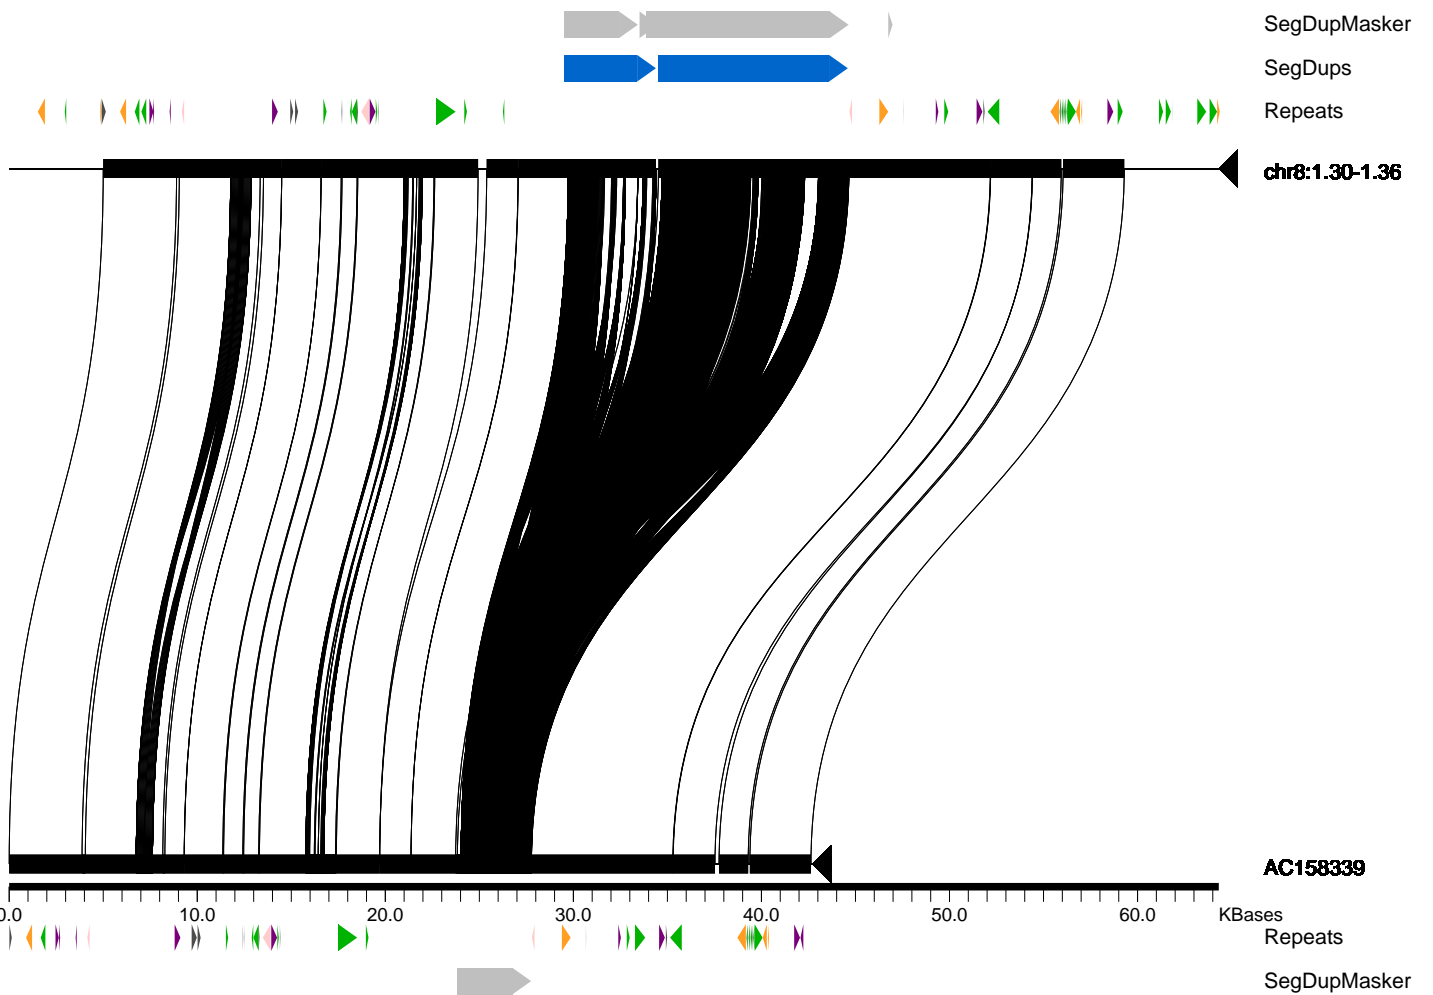

Clone: WIBR2-0560H10 Accession: AC196505

ESP Prediction: S Validation: I Mechanism: VNTR

Other Simple Repeat Low Complexity DNA LTR LINE SINE

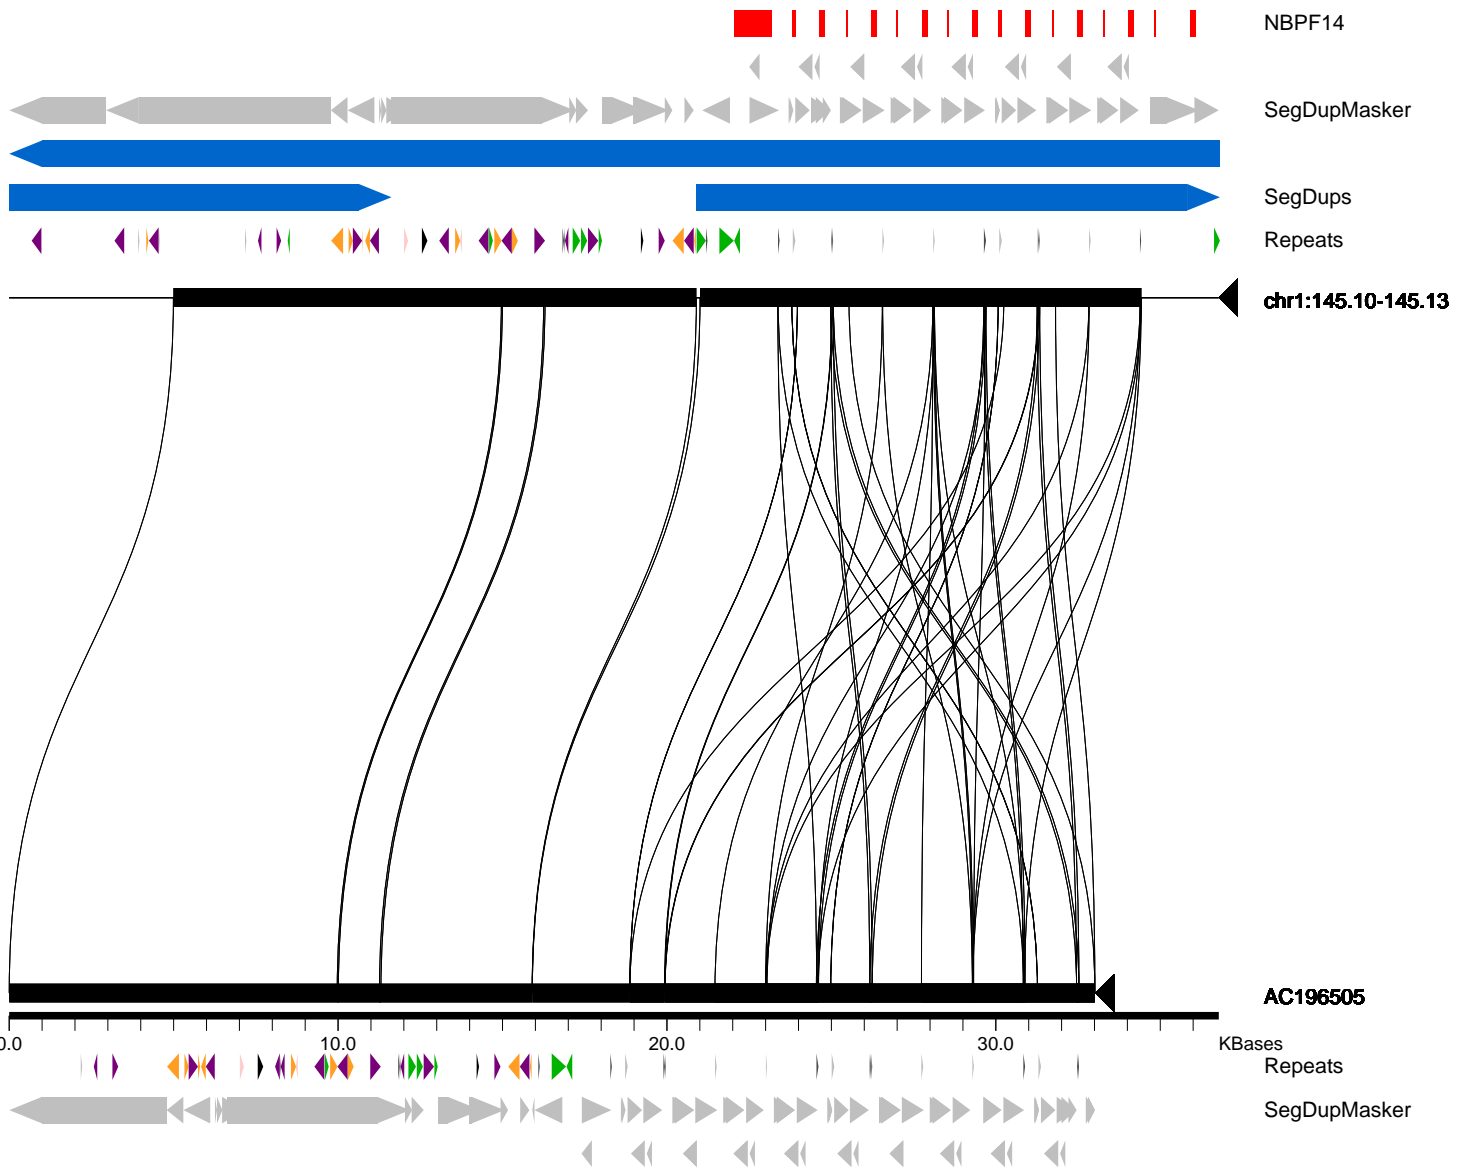

Clone: WIBR2-0792F13 Accession: AC196704

ESP Prediction: S Validation: U Mechanism: VNTR

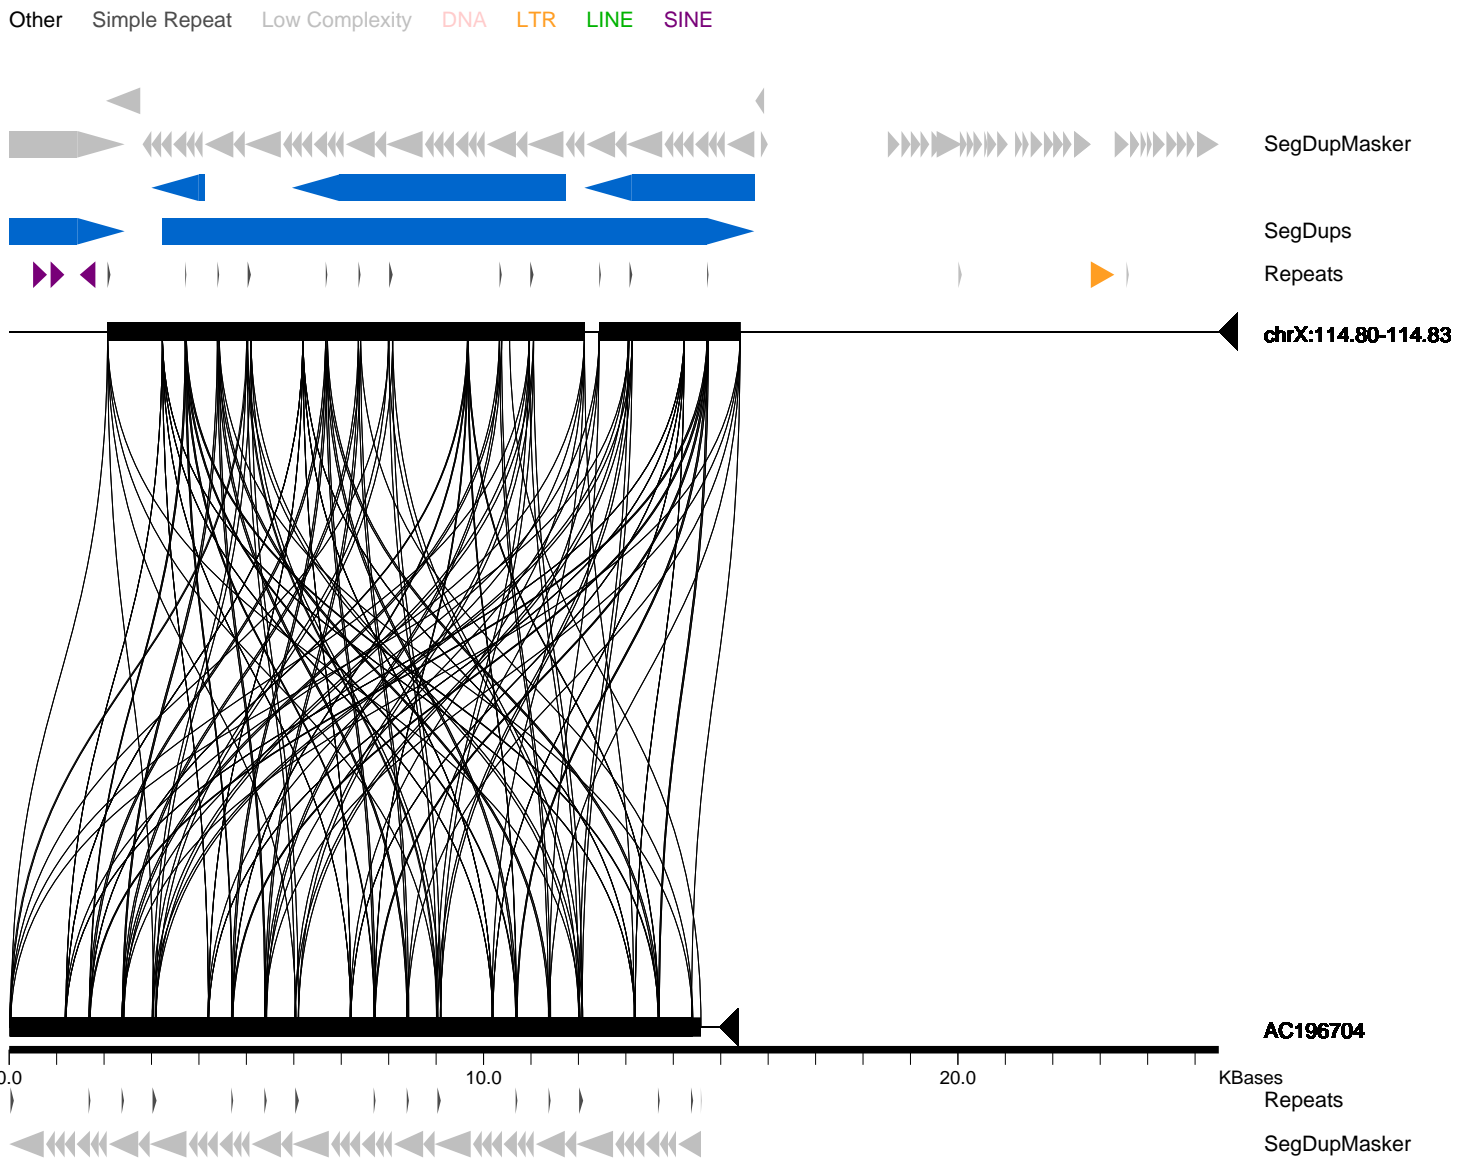

Clone: WIBR2-0778A09 Accession: AC196507

ESP Prediction: S Validation: I Mechanism: VNTR

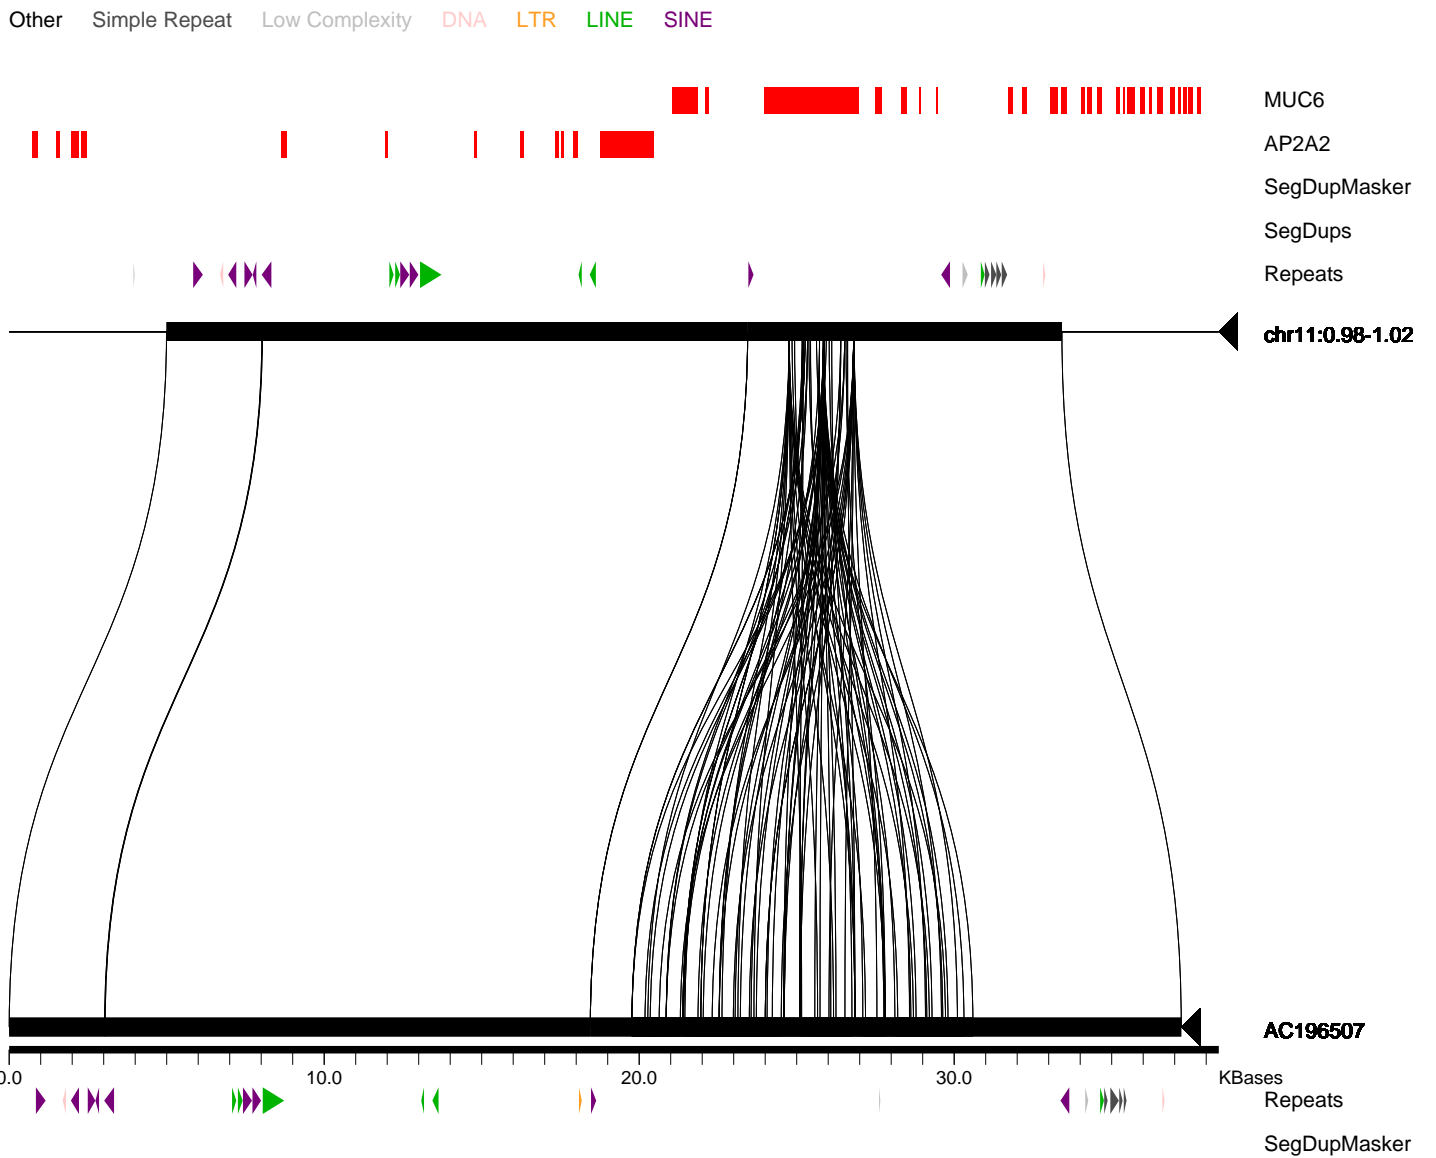

Clone: WIBR2-2540O06 Accession: AC195747

ESP Prediction: S Validation: U Mechanism: VNTR

Other Simple Repeat Low Complexity DNA LTR LINE SINE

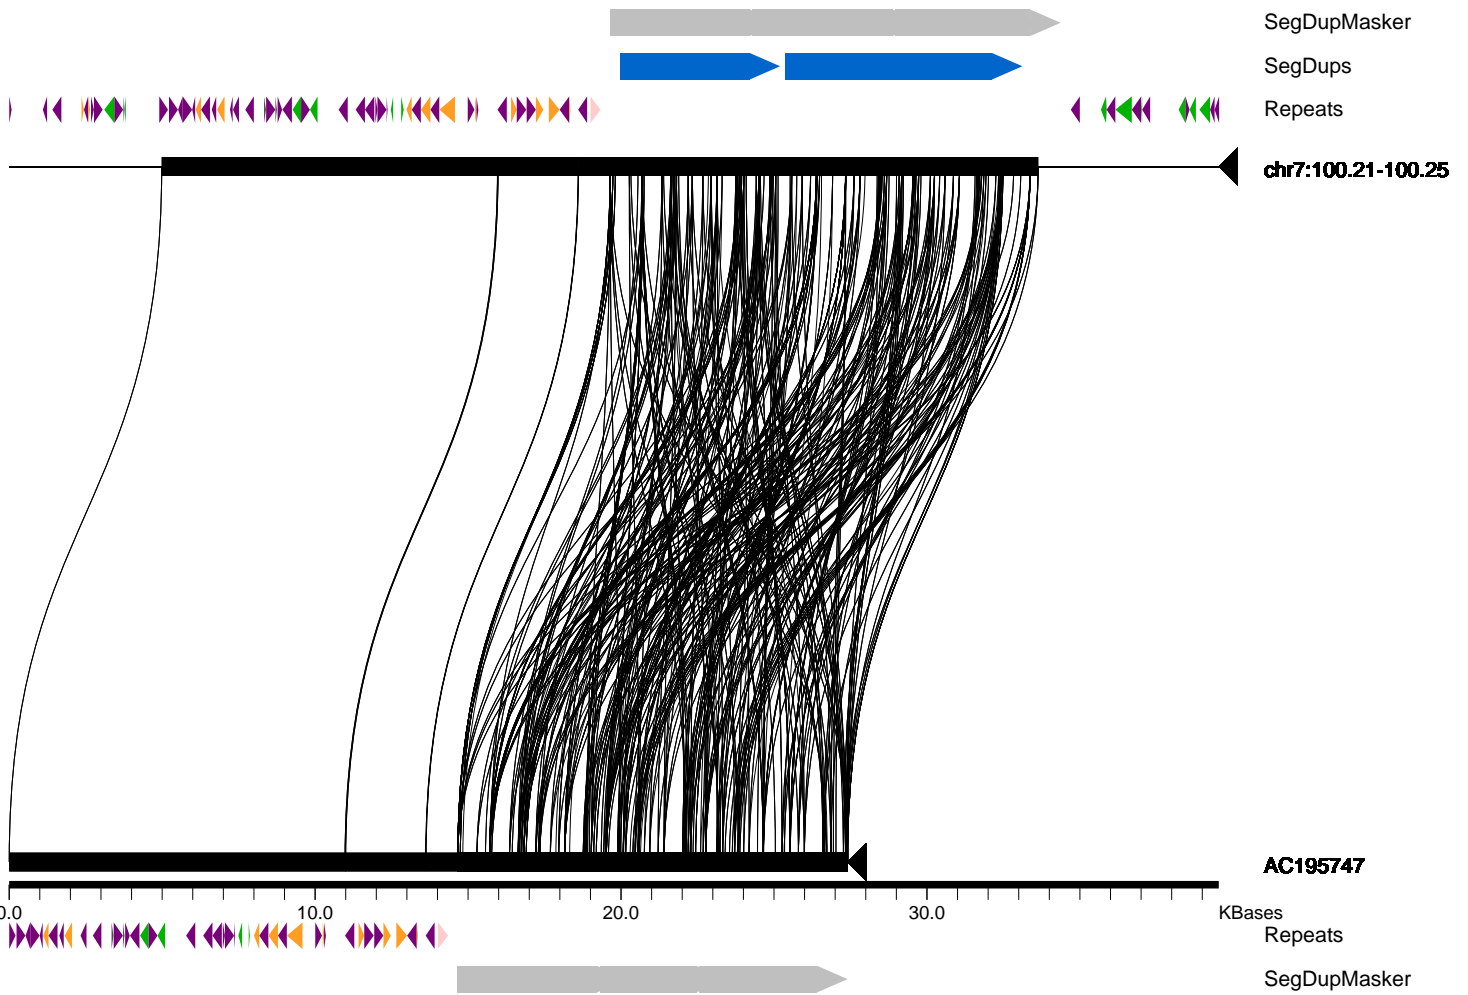

Clone: WIBR2-0484M12 Accession: AC196503

ESP Prediction: S Validation: U Mechanism: VNTR END

Other Simple Repeat Low Complexity DNA LTR LINE SINE

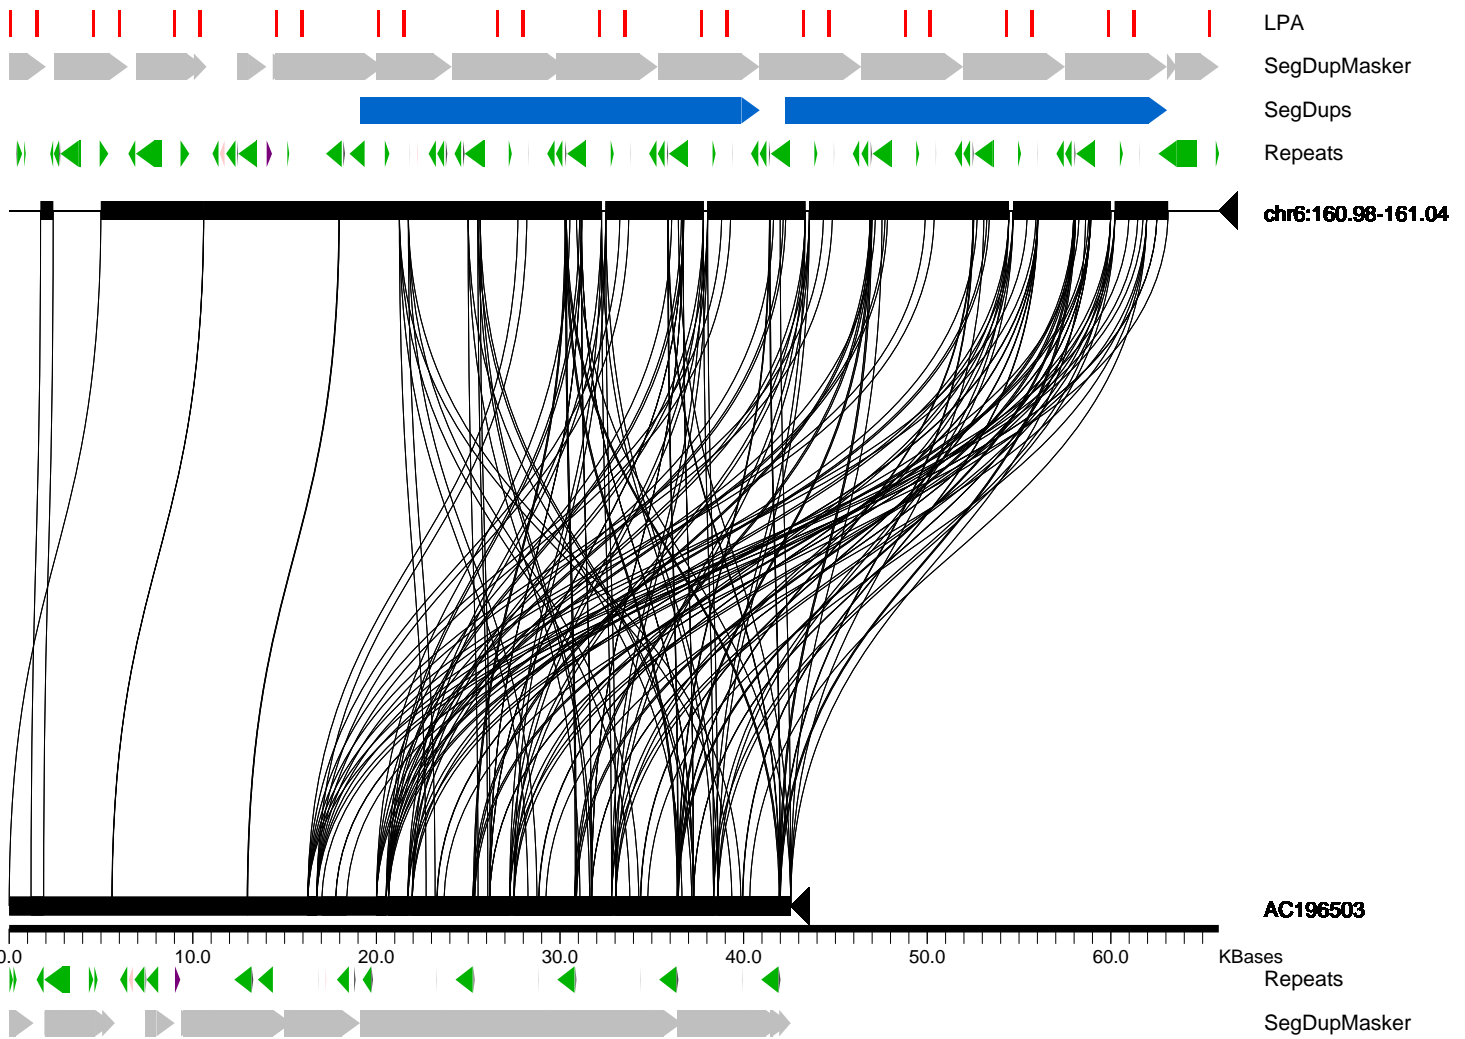

Clone: WIBR2-2218K08 Accession: AC196528

ESP Prediction: B Validation: D Mechanism: VNTR

Other Simple Repeat Low Complexity DNA LTR LINE SINE

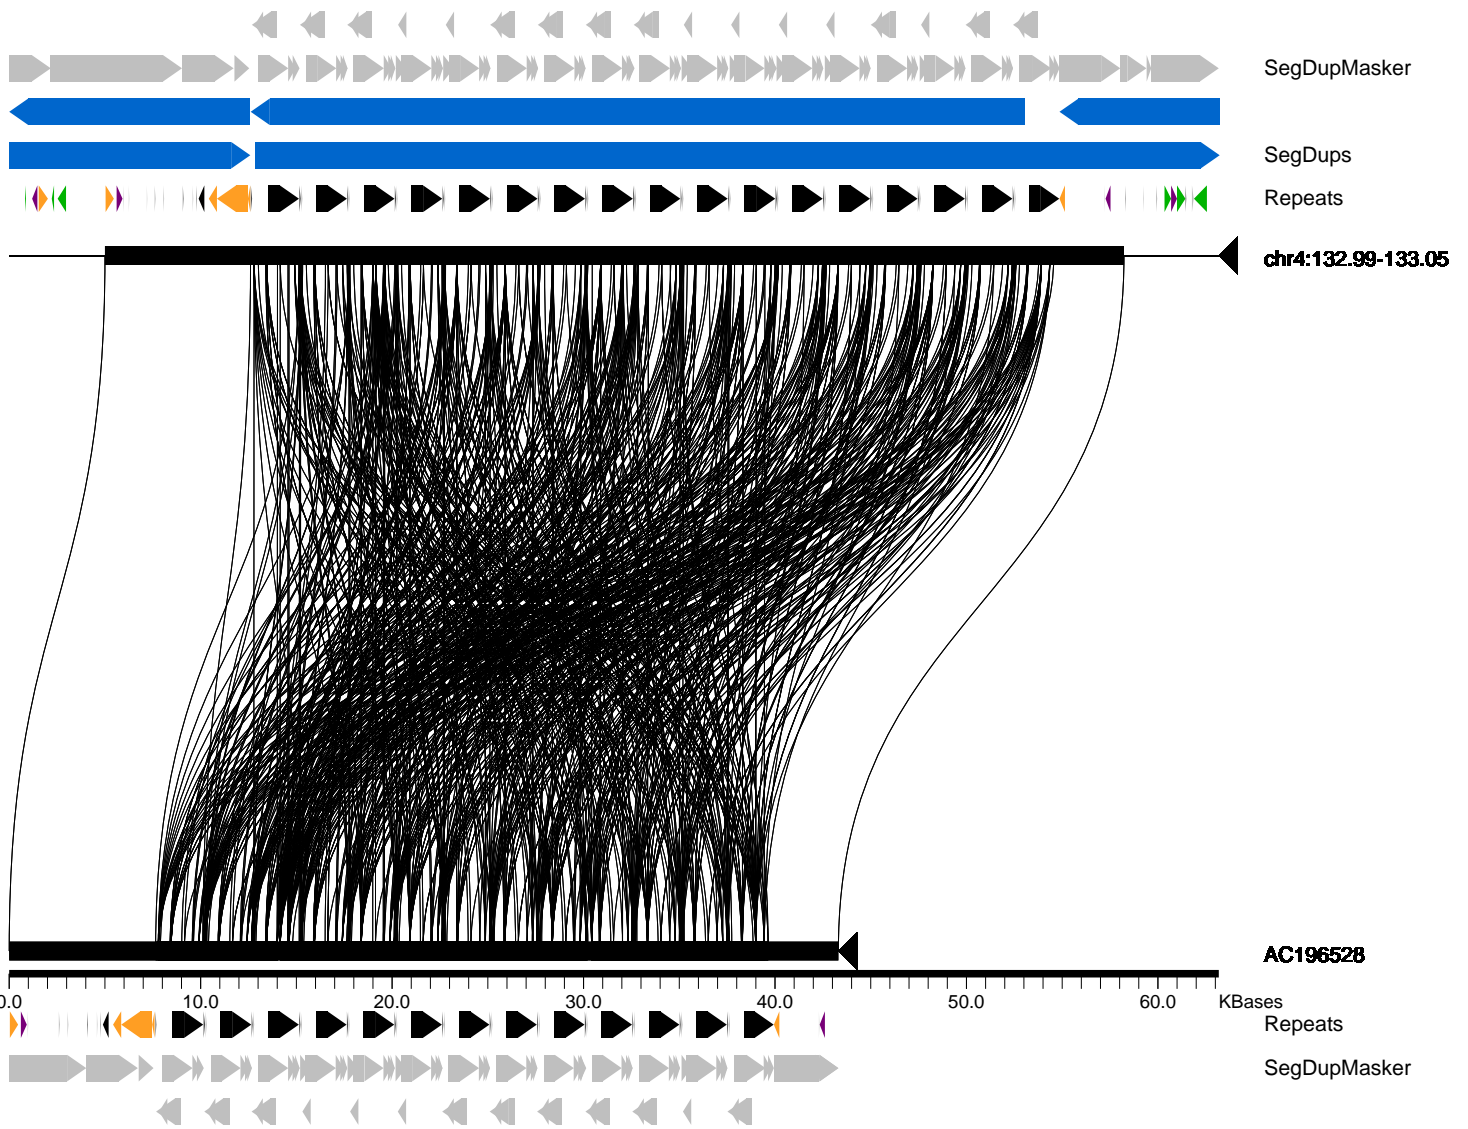

Clone: WIBR2-2244C17 Accession: AC195759

ESP Prediction: S Validation: U Mechanism: VNTR

Other Simple Repeat Low Complexity DNA LTR LINE SINE

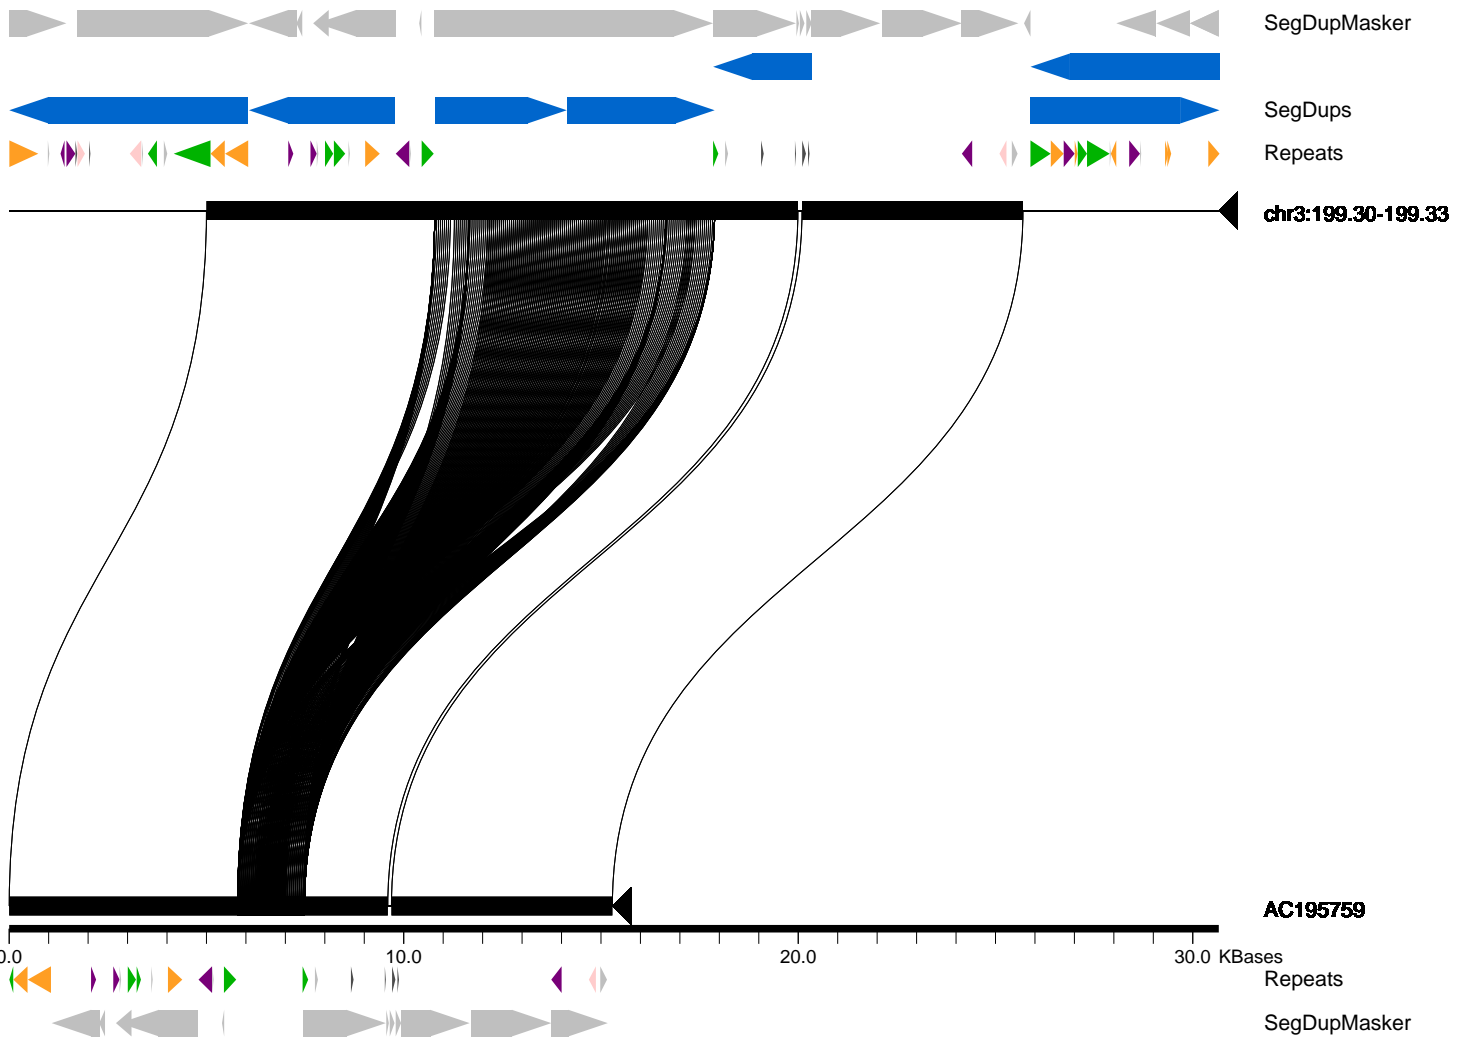



Clone: WIBR2-0700O20 Accession: AC196703

ESP Prediction: S Validation: U Mechanism: VNTR

Other Simple Repeat Low Complexity DNA LTR LINE SINE

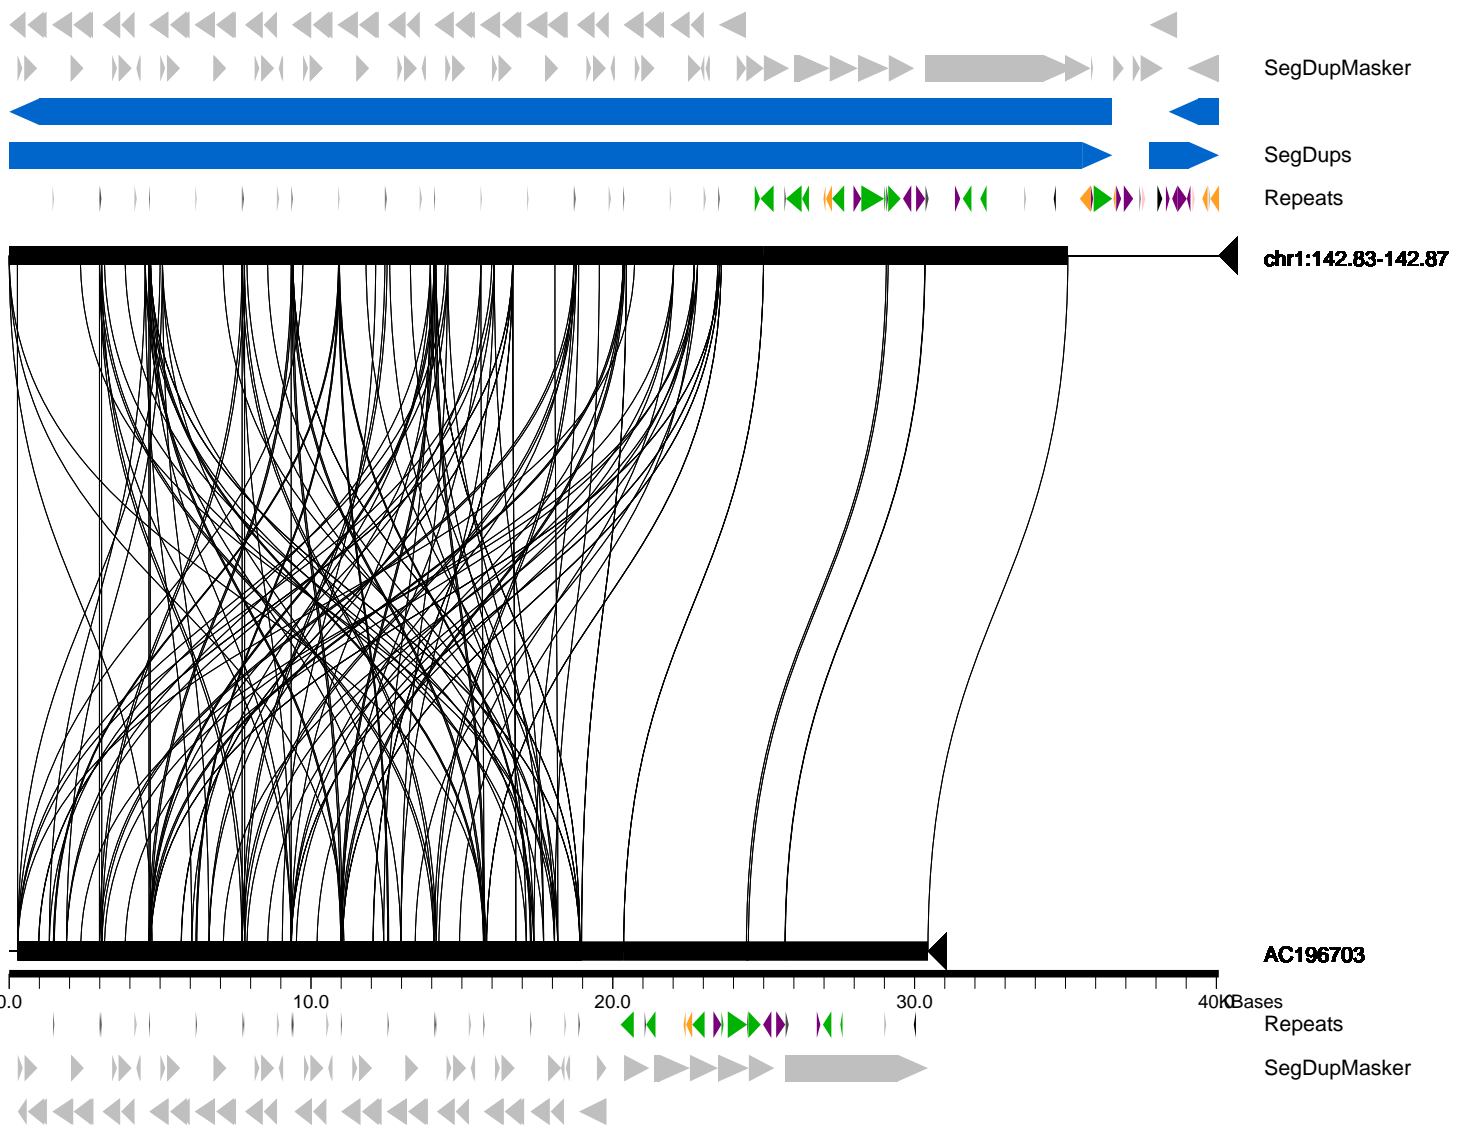

Clone: WIBR2-0633P16 Accession: AC196506

ESP Prediction: S Validation: I Mechanism: VNTR

Other Simple Repeat Low Complexity DNA LTR LINE SINE

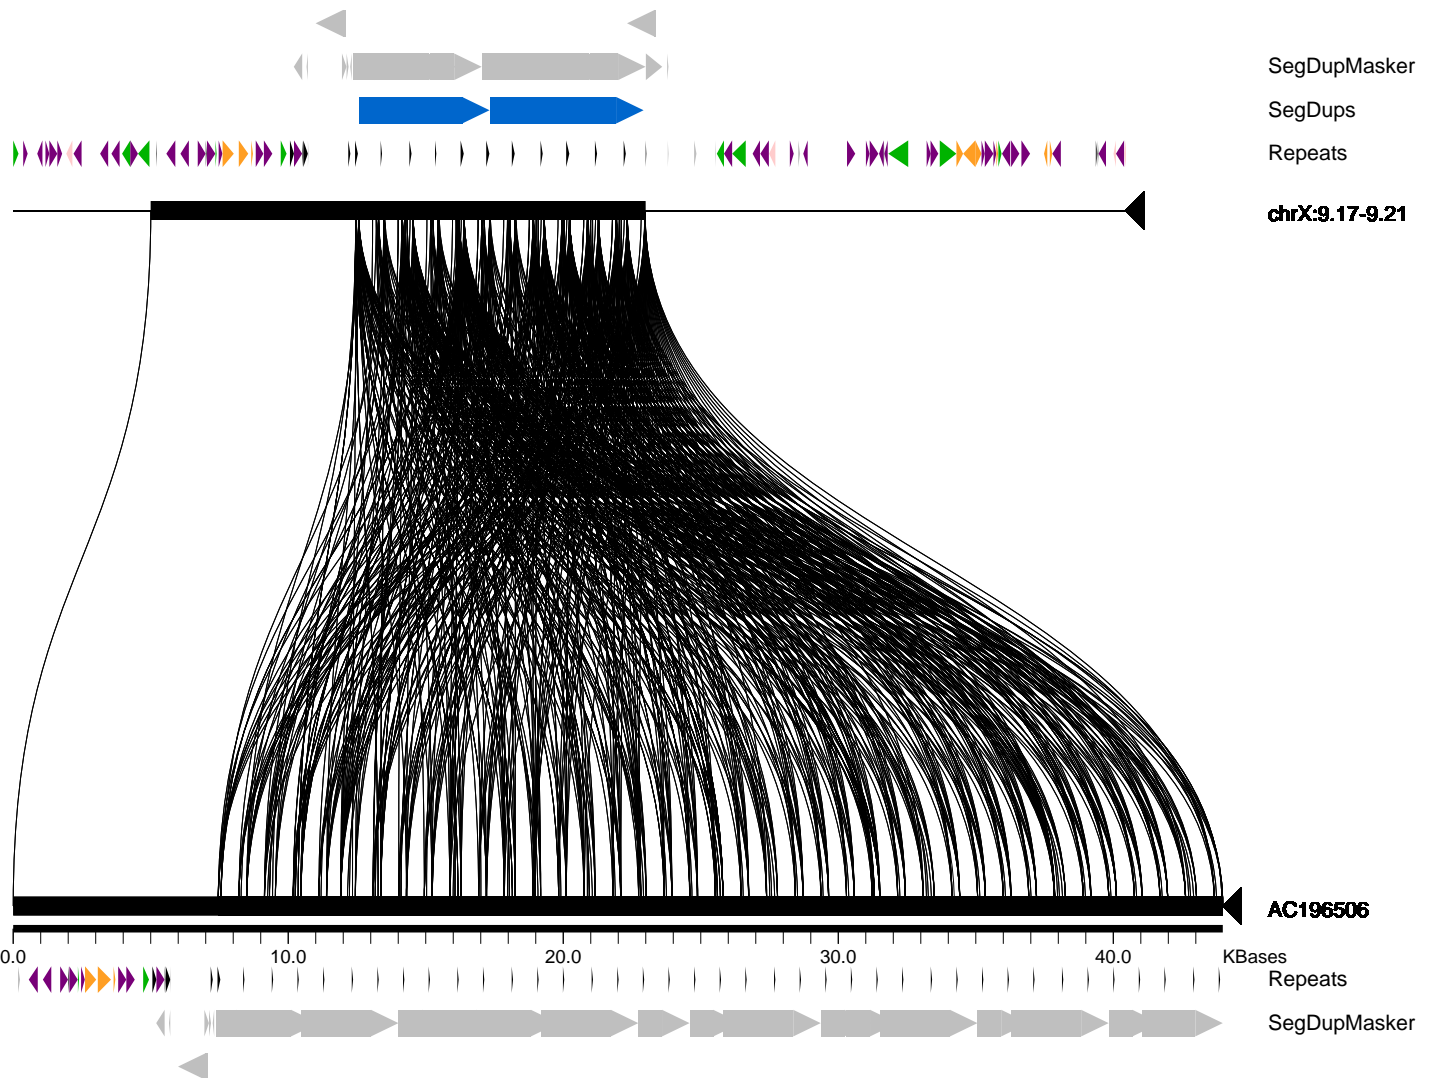

Clone: WIBR2-2988O16 Accession: AC196542

ESP Prediction: S Validation: I Mechanism: VNTR

Other Simple Repeat Low Complexity DNA LTR LINE SINE

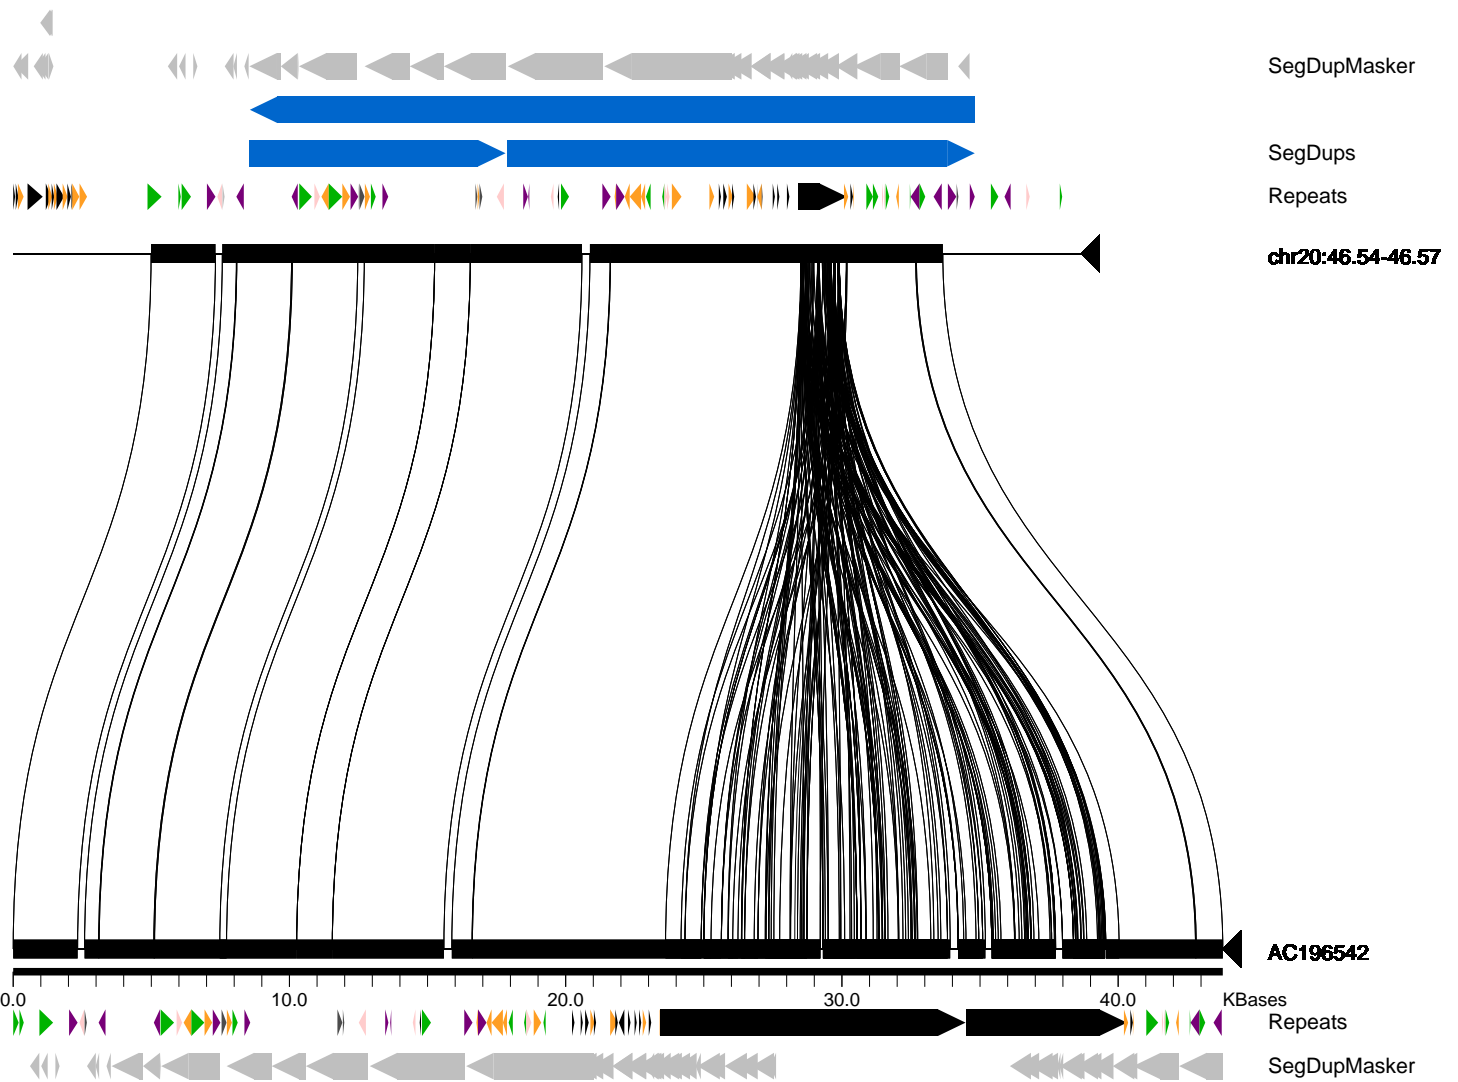

Clone: ABC10\_44455000\_E13 Accession: AC203660

ESP Prediction: S Validation: U,complex Mechanism:

Other Simple Repeat Low Complexity DNA LTR LINE SINE

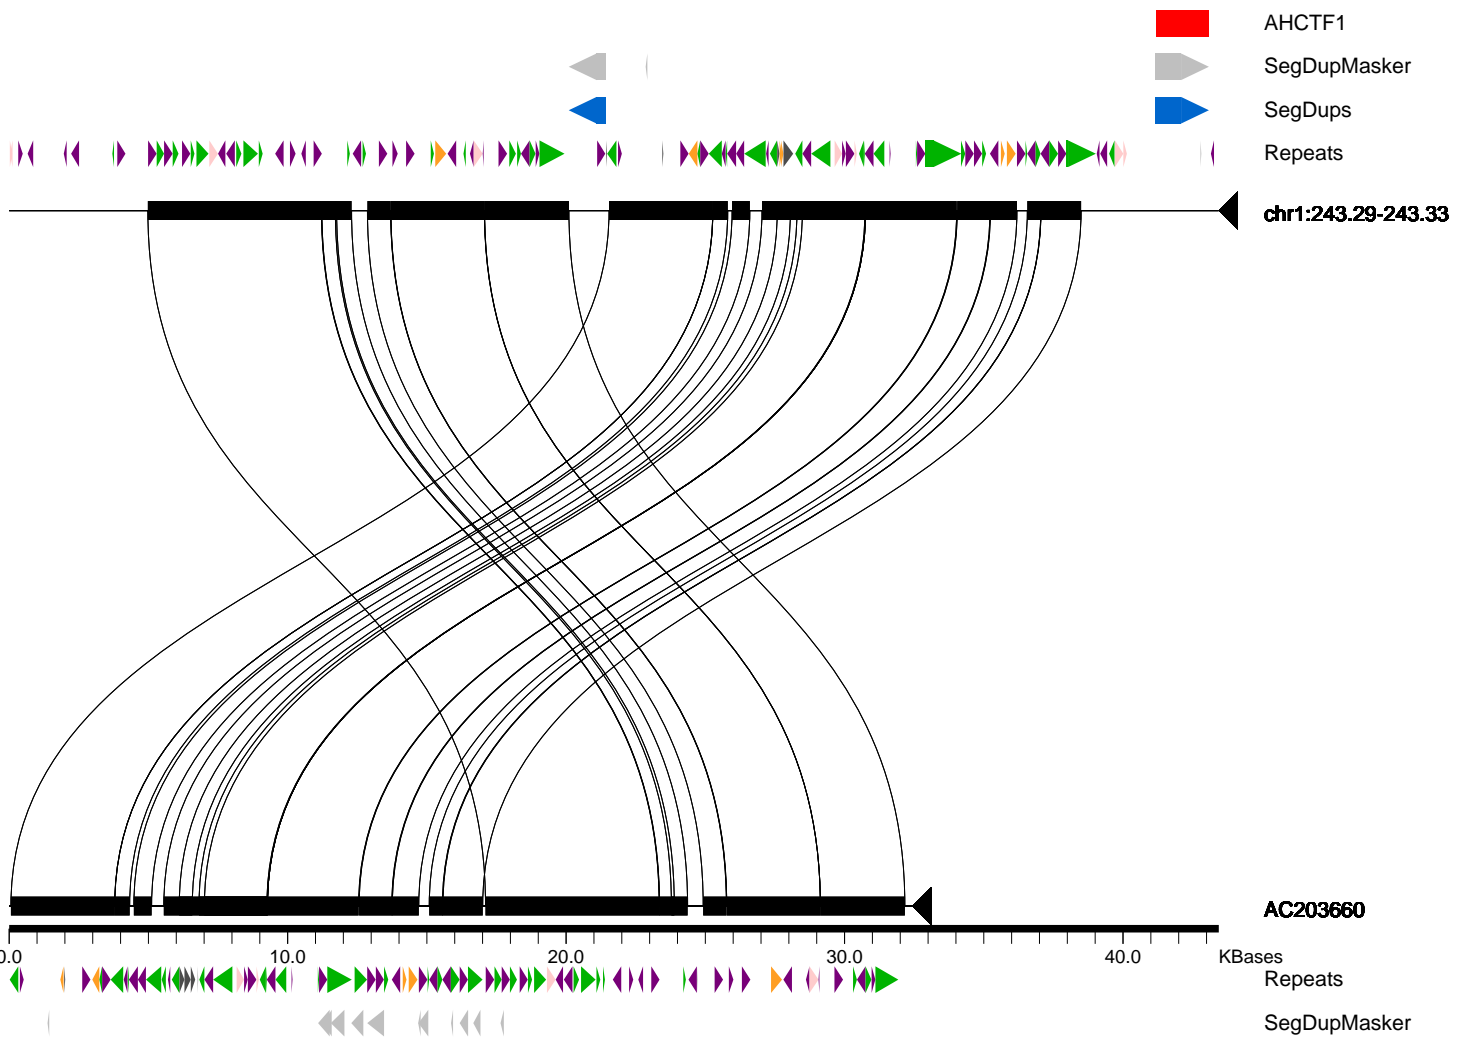

Clone: ABC10\_45495700\_I9 Accession: AC205939

ESP Prediction: S Validation: I Mechanism: ?

Other Simple Repeat Low Complexity DNA LTR LINE SINE

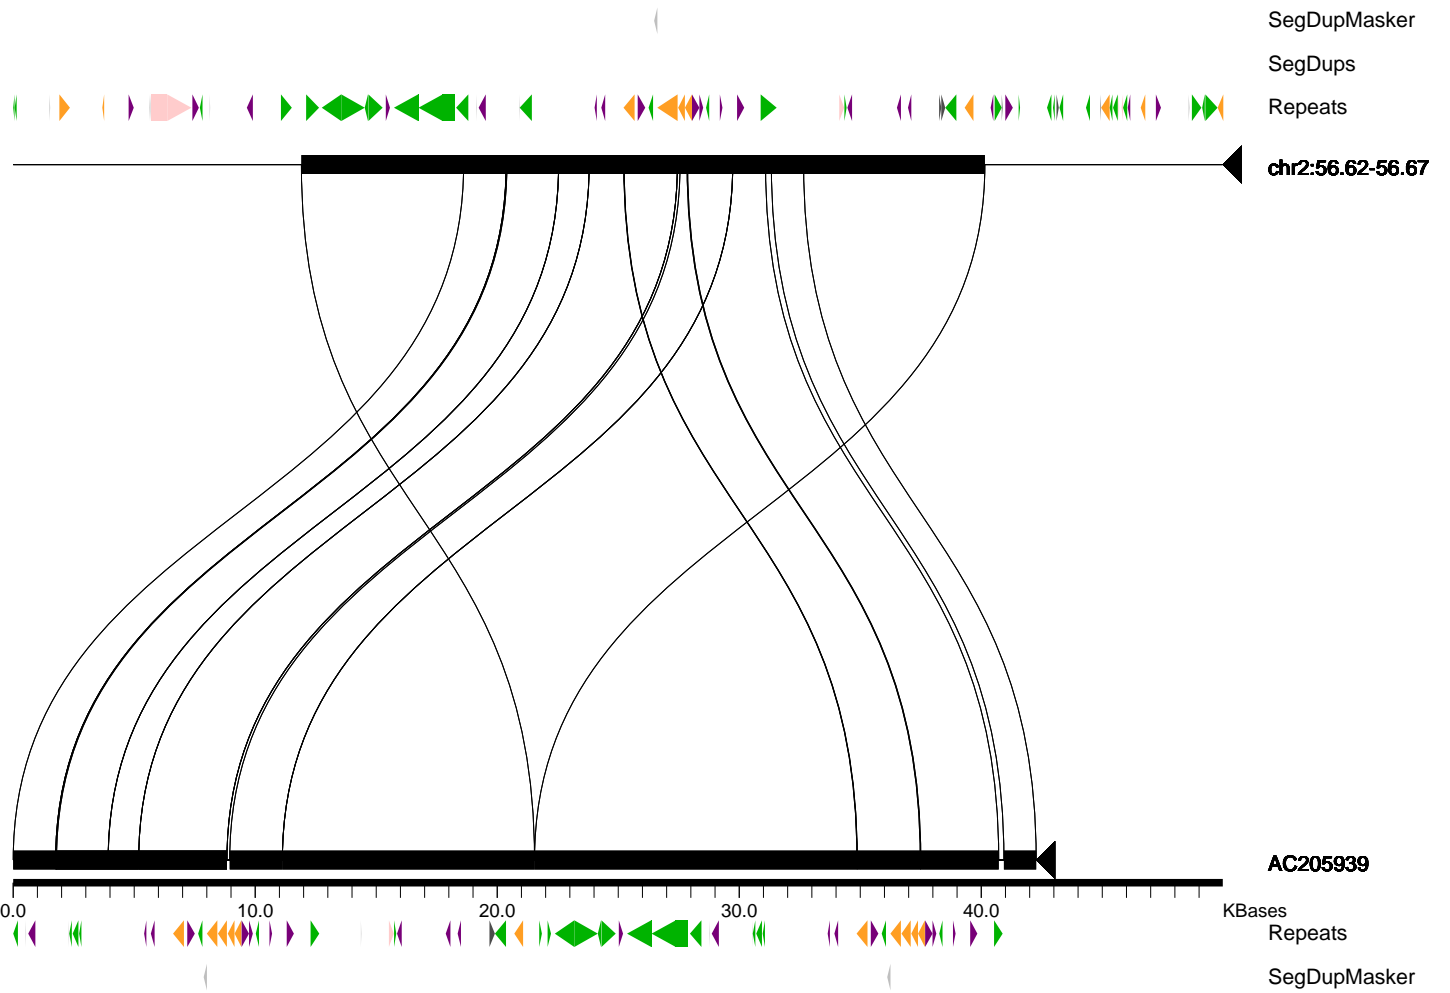

Clone: ABC10\_44051000\_F11 Accession: AC203638

ESP Prediction: S Validation: U,complex Mechanism:

Other Simple Repeat Low Complexity DNA LTR LINE SINE

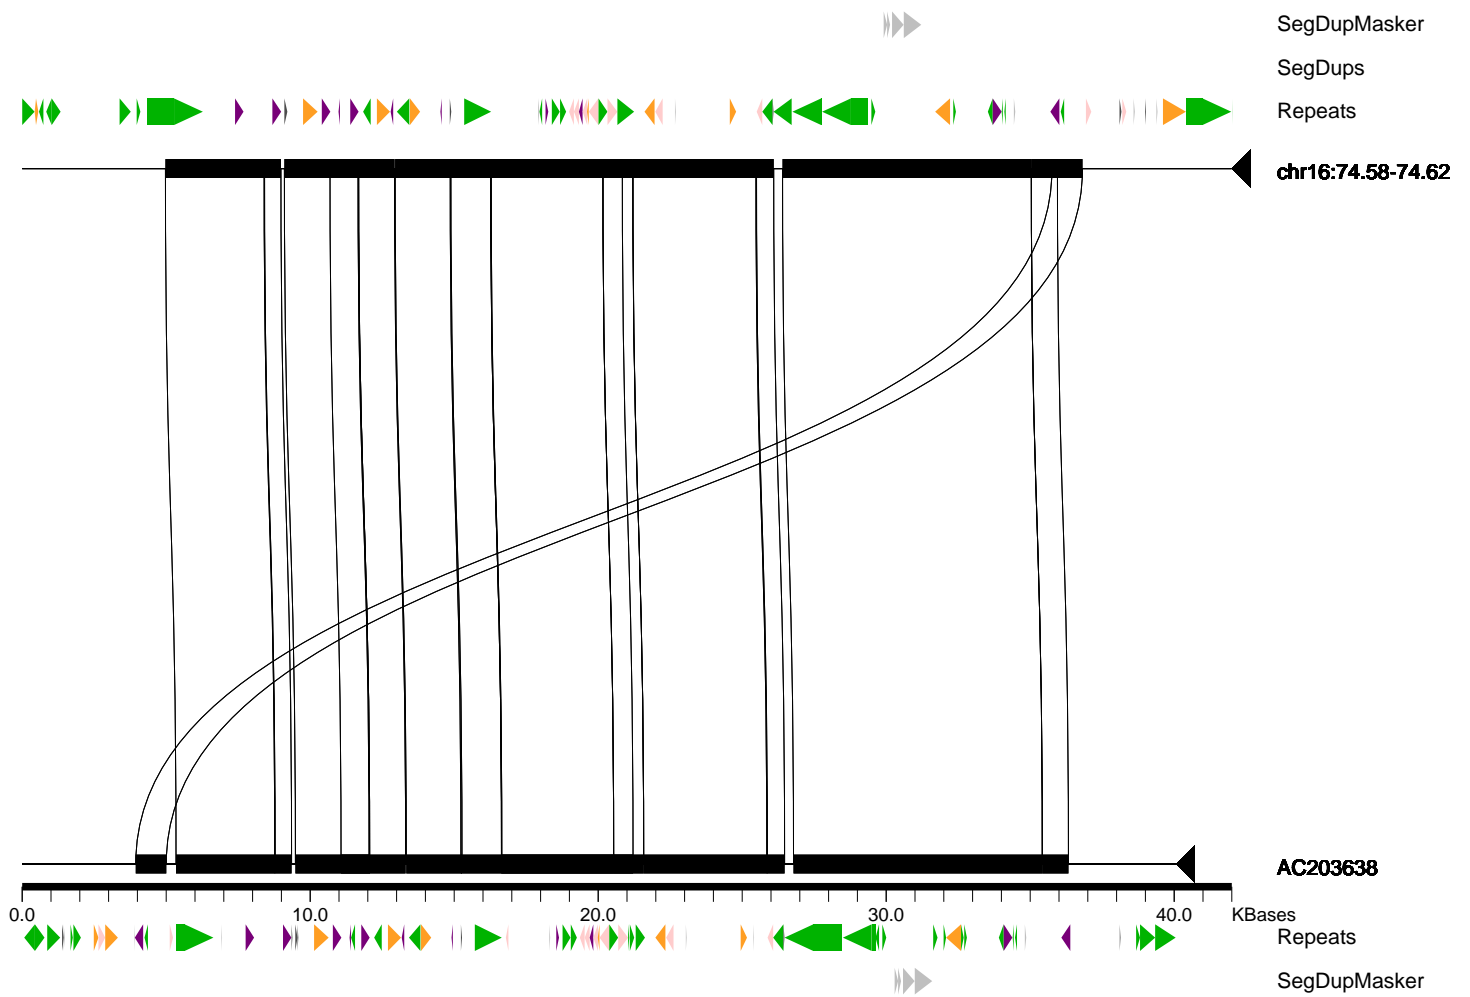

Clone: ABC10\_44515600\_P8 Accession: AC203622

ESP Prediction: B Validation: U,complex Mechanism:

Other Simple Repeat Low Complexity DNA LTR LINE SINE

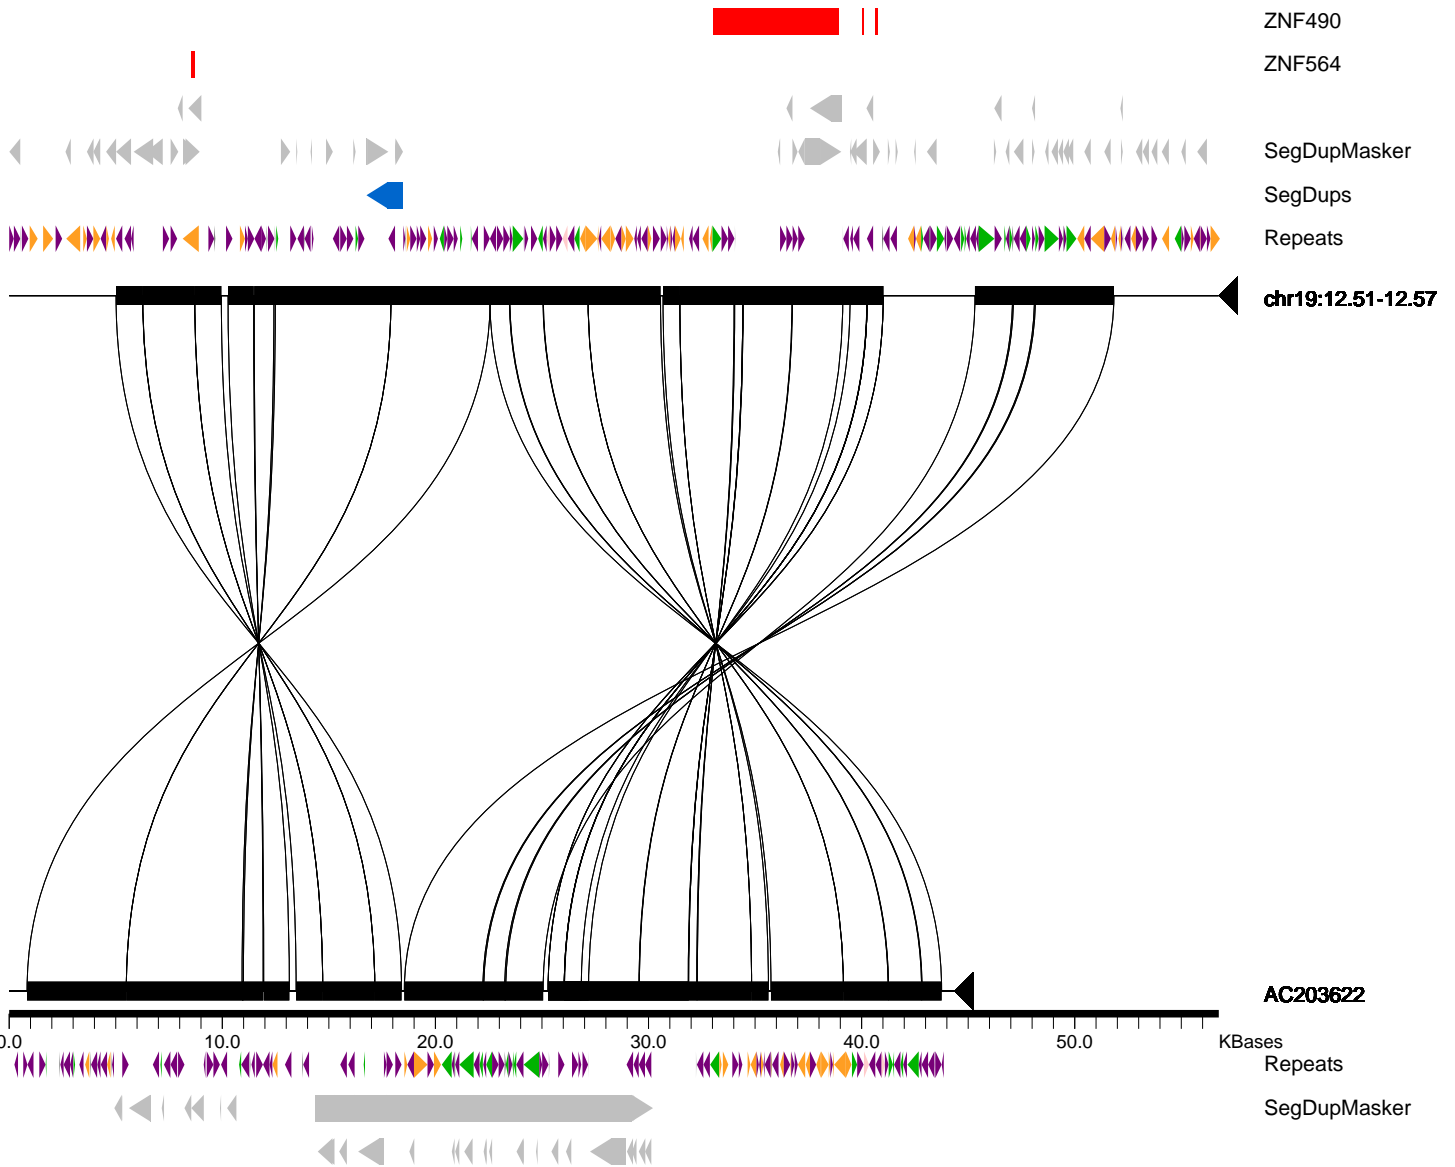

Clone: ABC7\_42054800\_G1 Accession: AC213230

ESP Prediction: S Validation: U Mechanism: ? Not finished

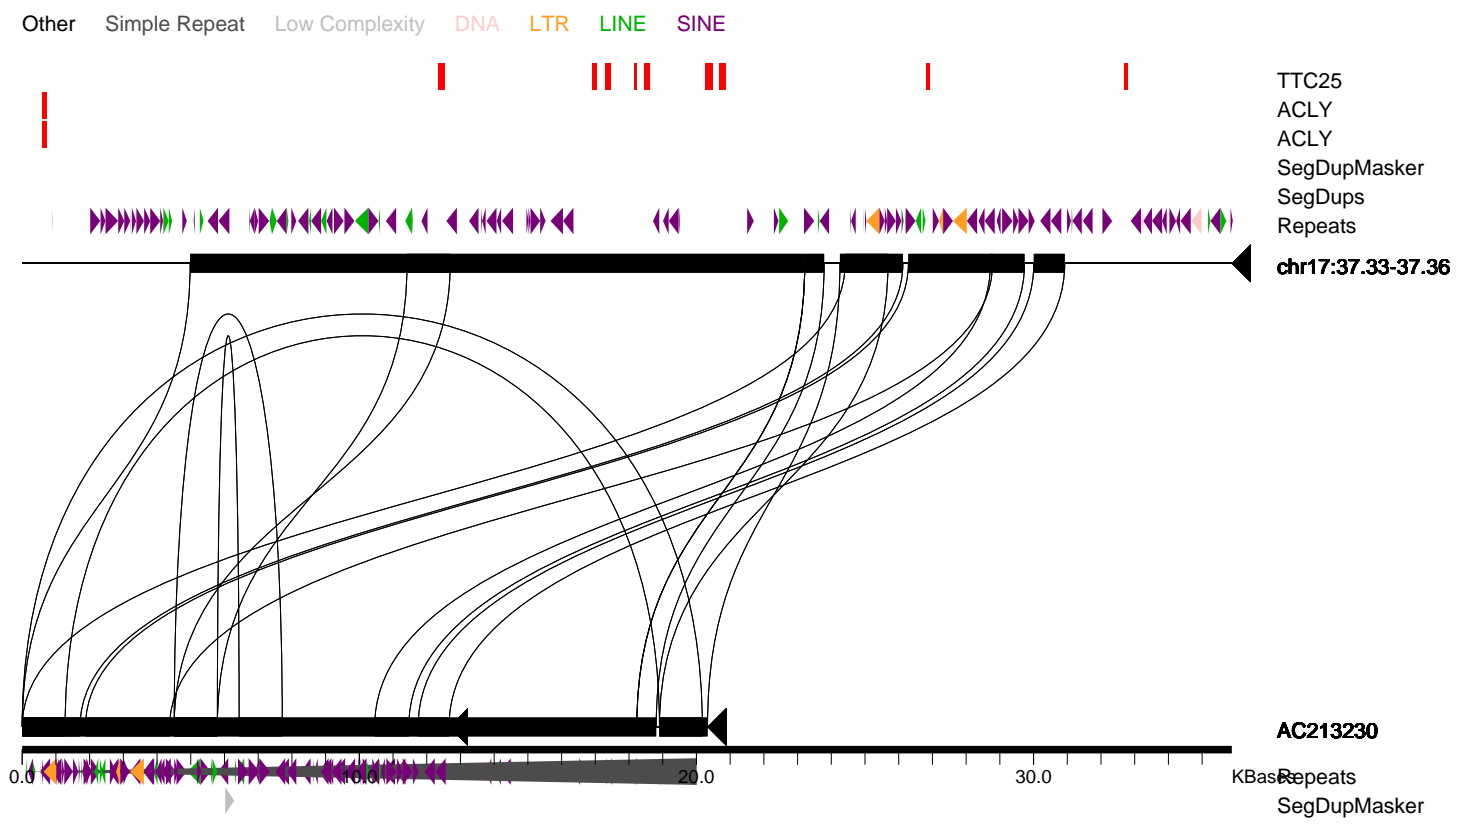



Clone: ABC7\_43040600\_N8 Accession: AC213500

ESP Prediction: S Validation: U Mechanism: Not finished

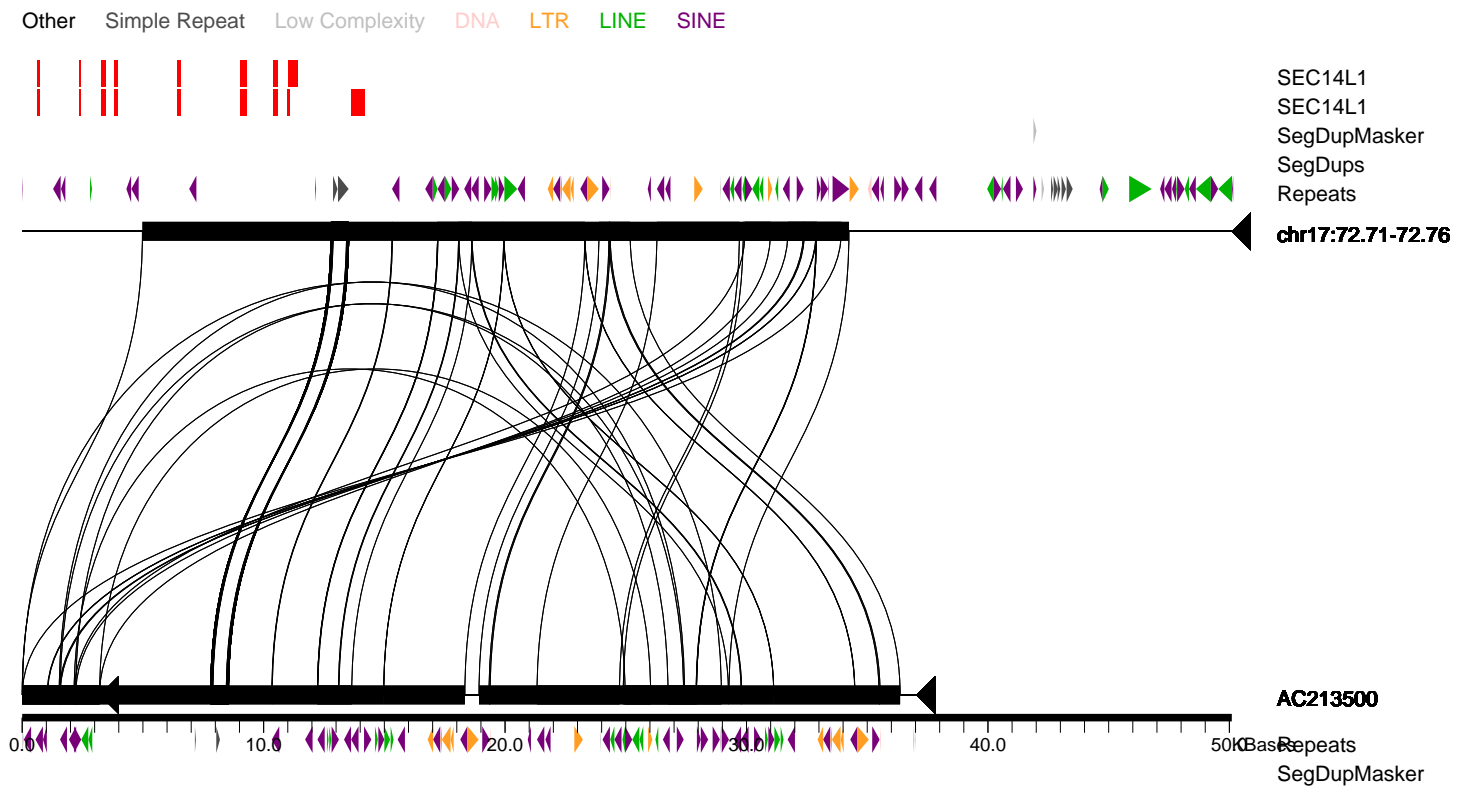

Clone: ABC7\_43066200\_O2 Accession: AC213231

ESP Prediction: S Validation: U Mechanism: Not finished

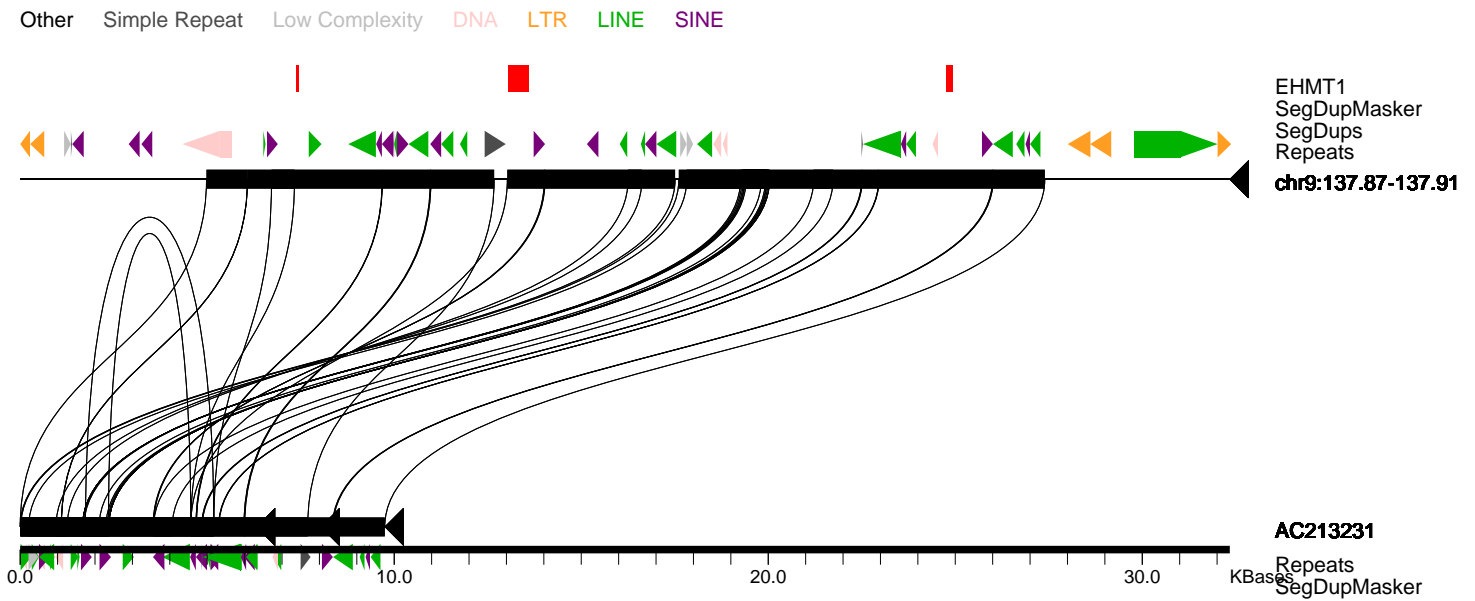

Clone: ABC8\_41796800\_I2 Accession: AC213269

ESP Prediction: S Validation: U Mechanism: Not finished

Other Simple Repeat Low Complexity DNA LTR LINE SINE

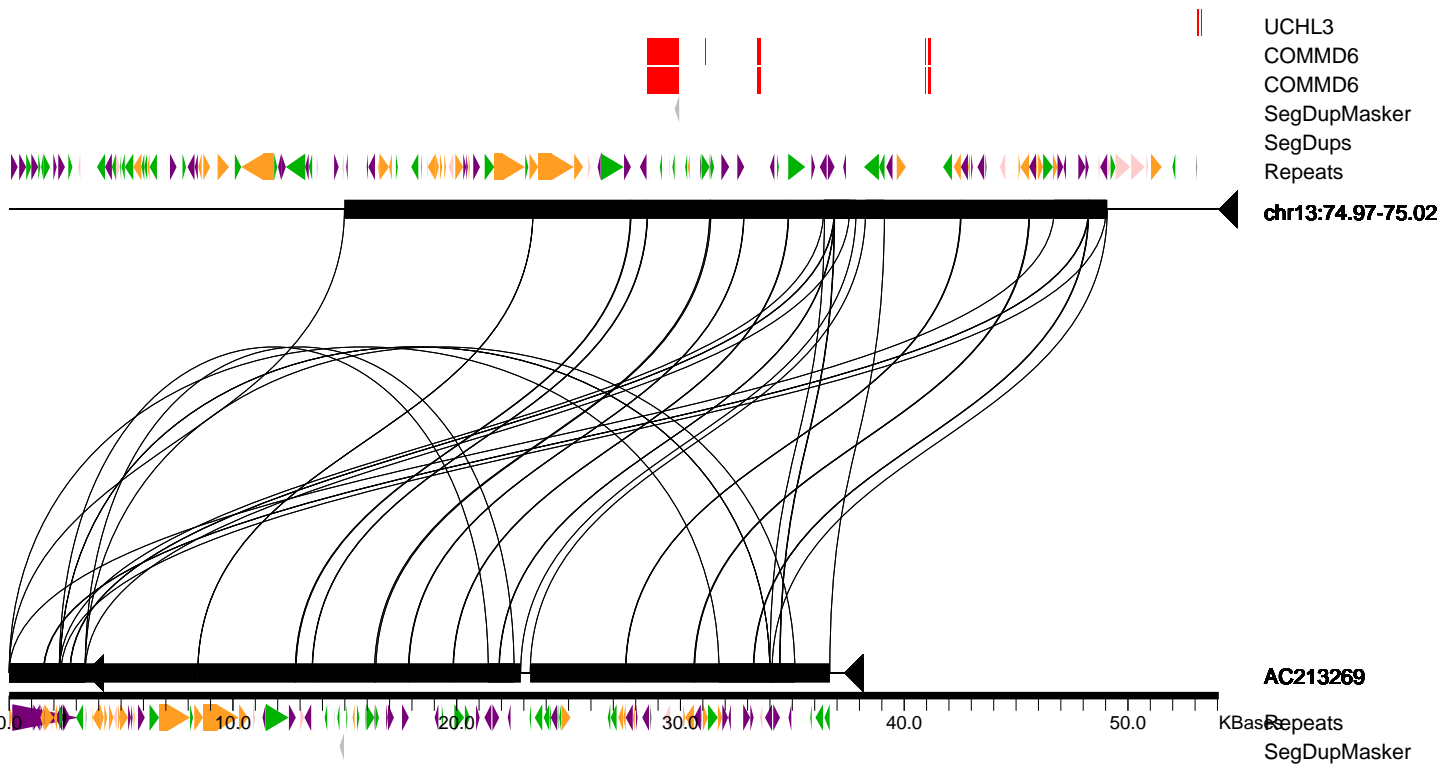

Clone: WIBR2-3197L16 Accession: AC153478

ESP Prediction: S Validation: U Mechanism:

Other Simple Repeat Low Complexity DNA LTR LINE SINE

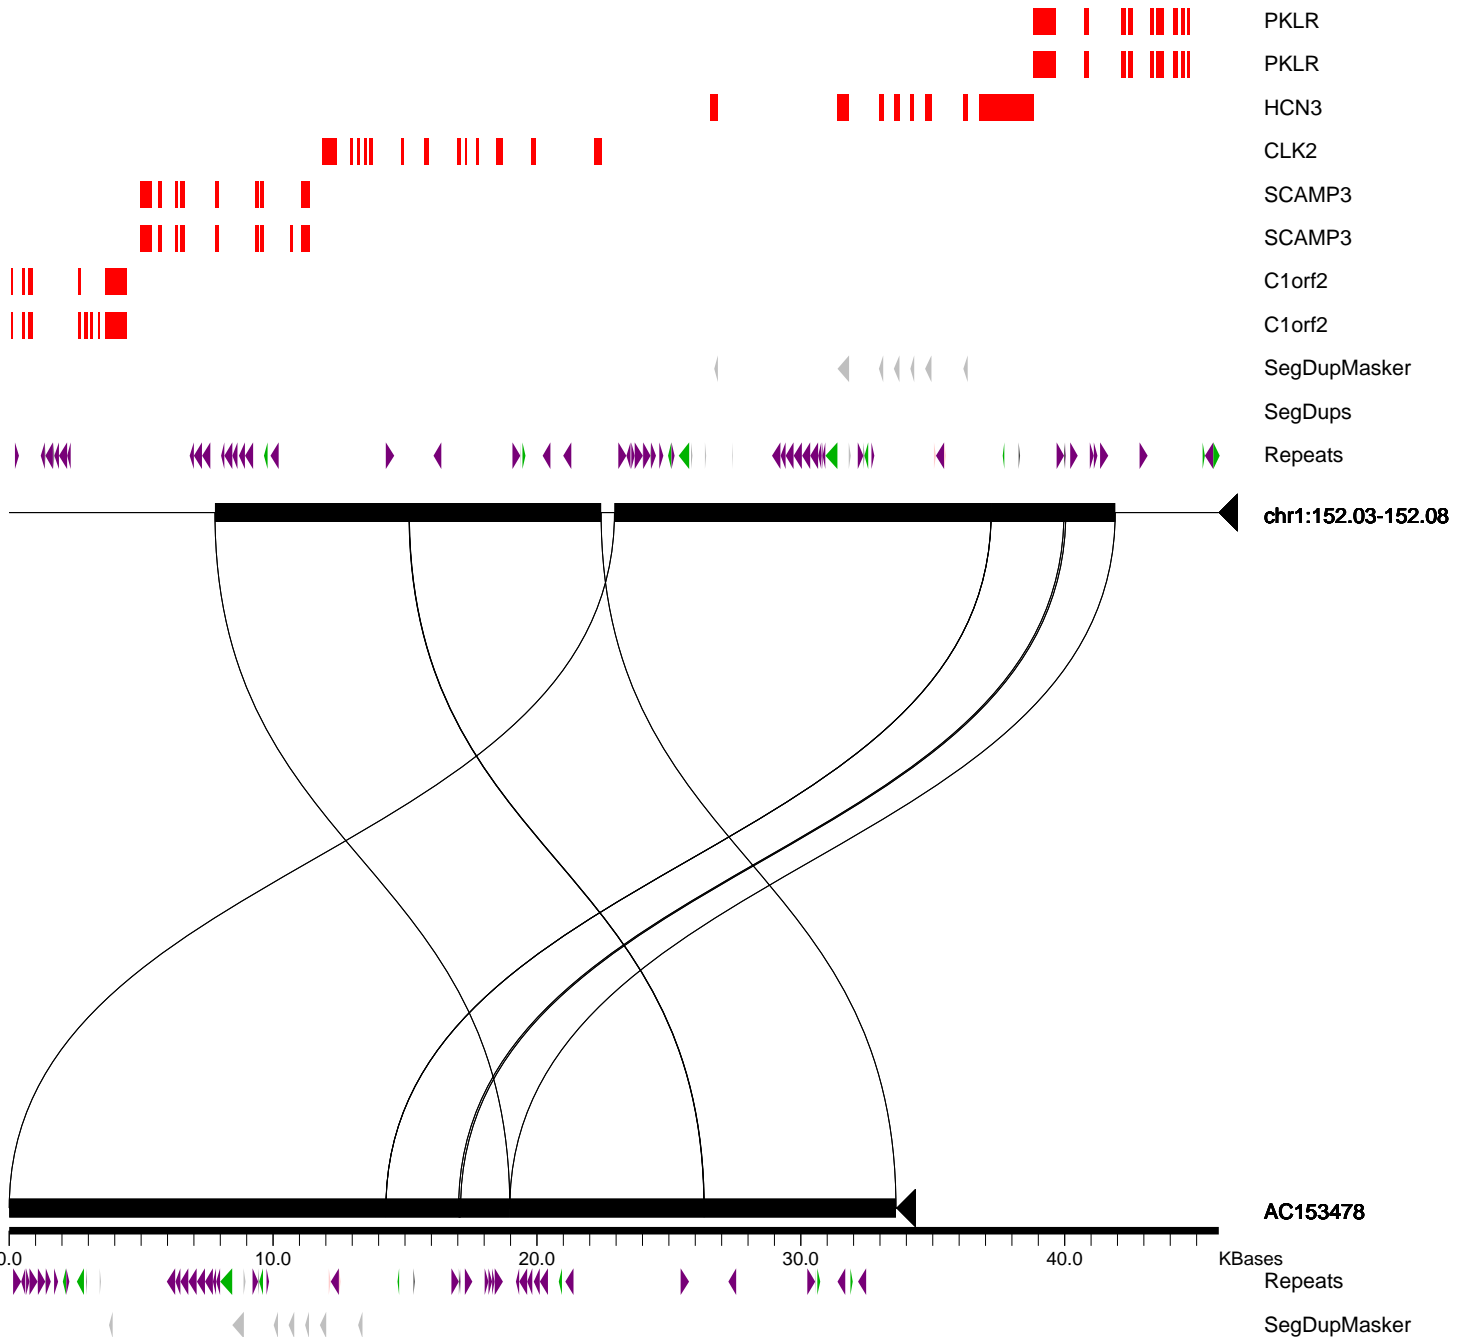

Clone: WIBR2-3172C01 Accession: AC193162

ESP Prediction: S Validation: U Mechanism: Not finished

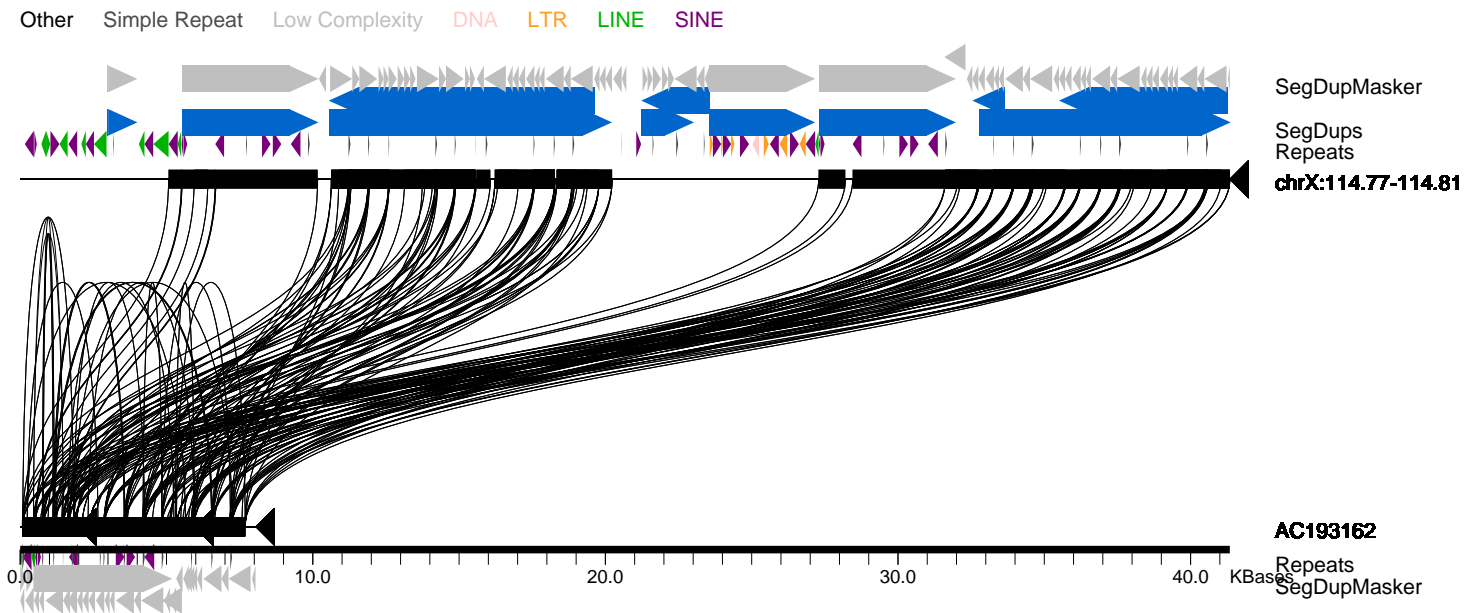

Clone: WIBR2-3036F15 Accession: AC153472

ESP Prediction: S Validation: U Mechanism: Not finished

Other Simple Repeat Low Complexity DNA LTR LINE SINE

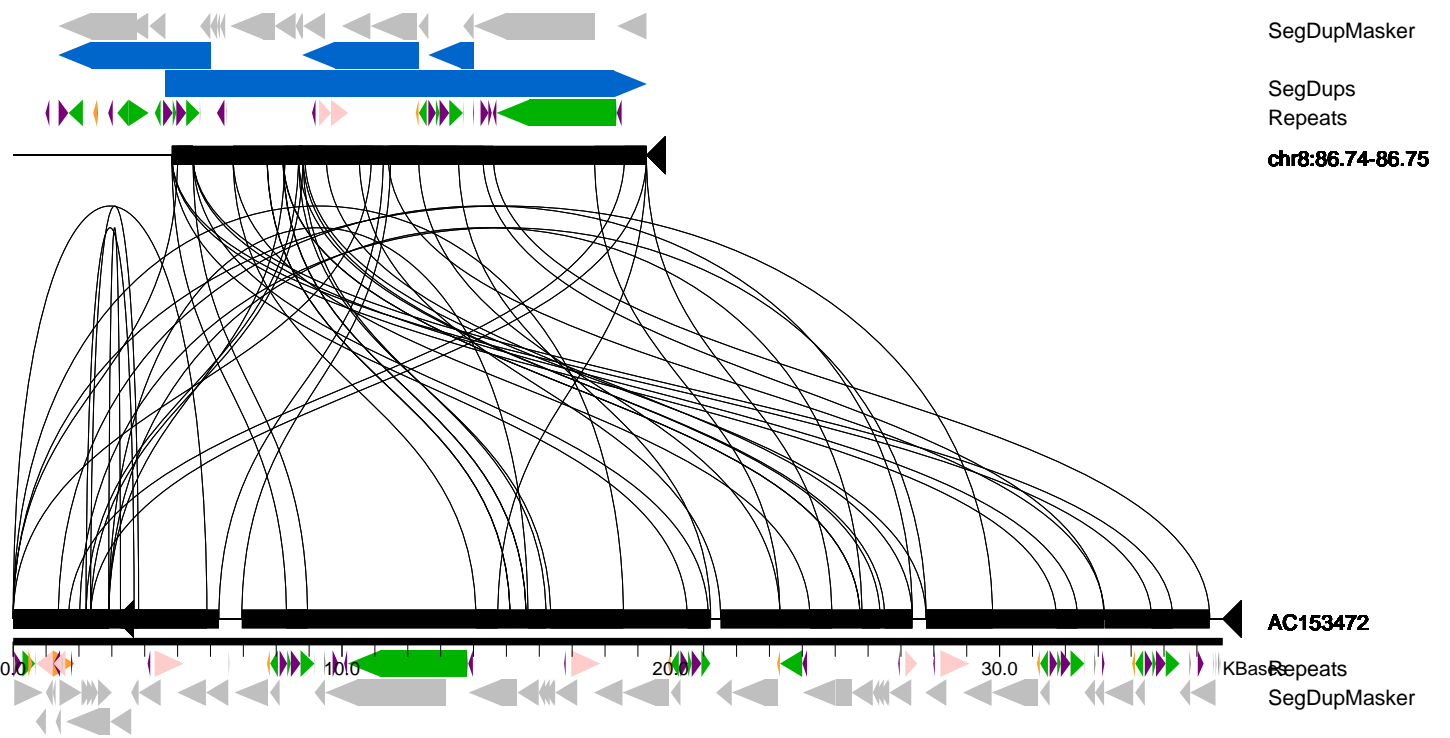

Clone: WIBR2-3224B10 Accession: AC195771

ESP Prediction: S Validation: U Mechanism: Not finished

Other Simple Repeat Low Complexity DNA LTR LINE SINE

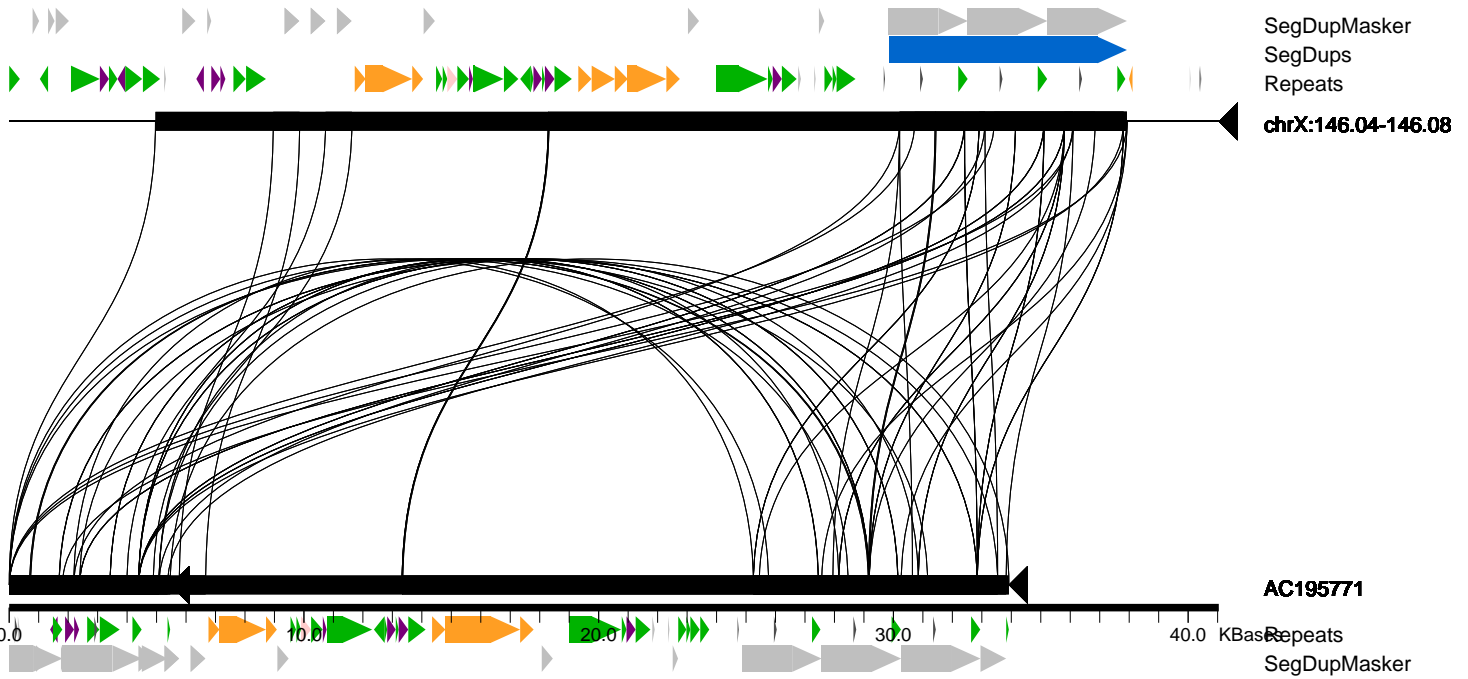

Clone: WIBR2-3628D20 Accession: AC193104

ESP Prediction: B Validation: U Mechanism:

Other Simple Repeat Low Complexity DNA LTR LINE SINE

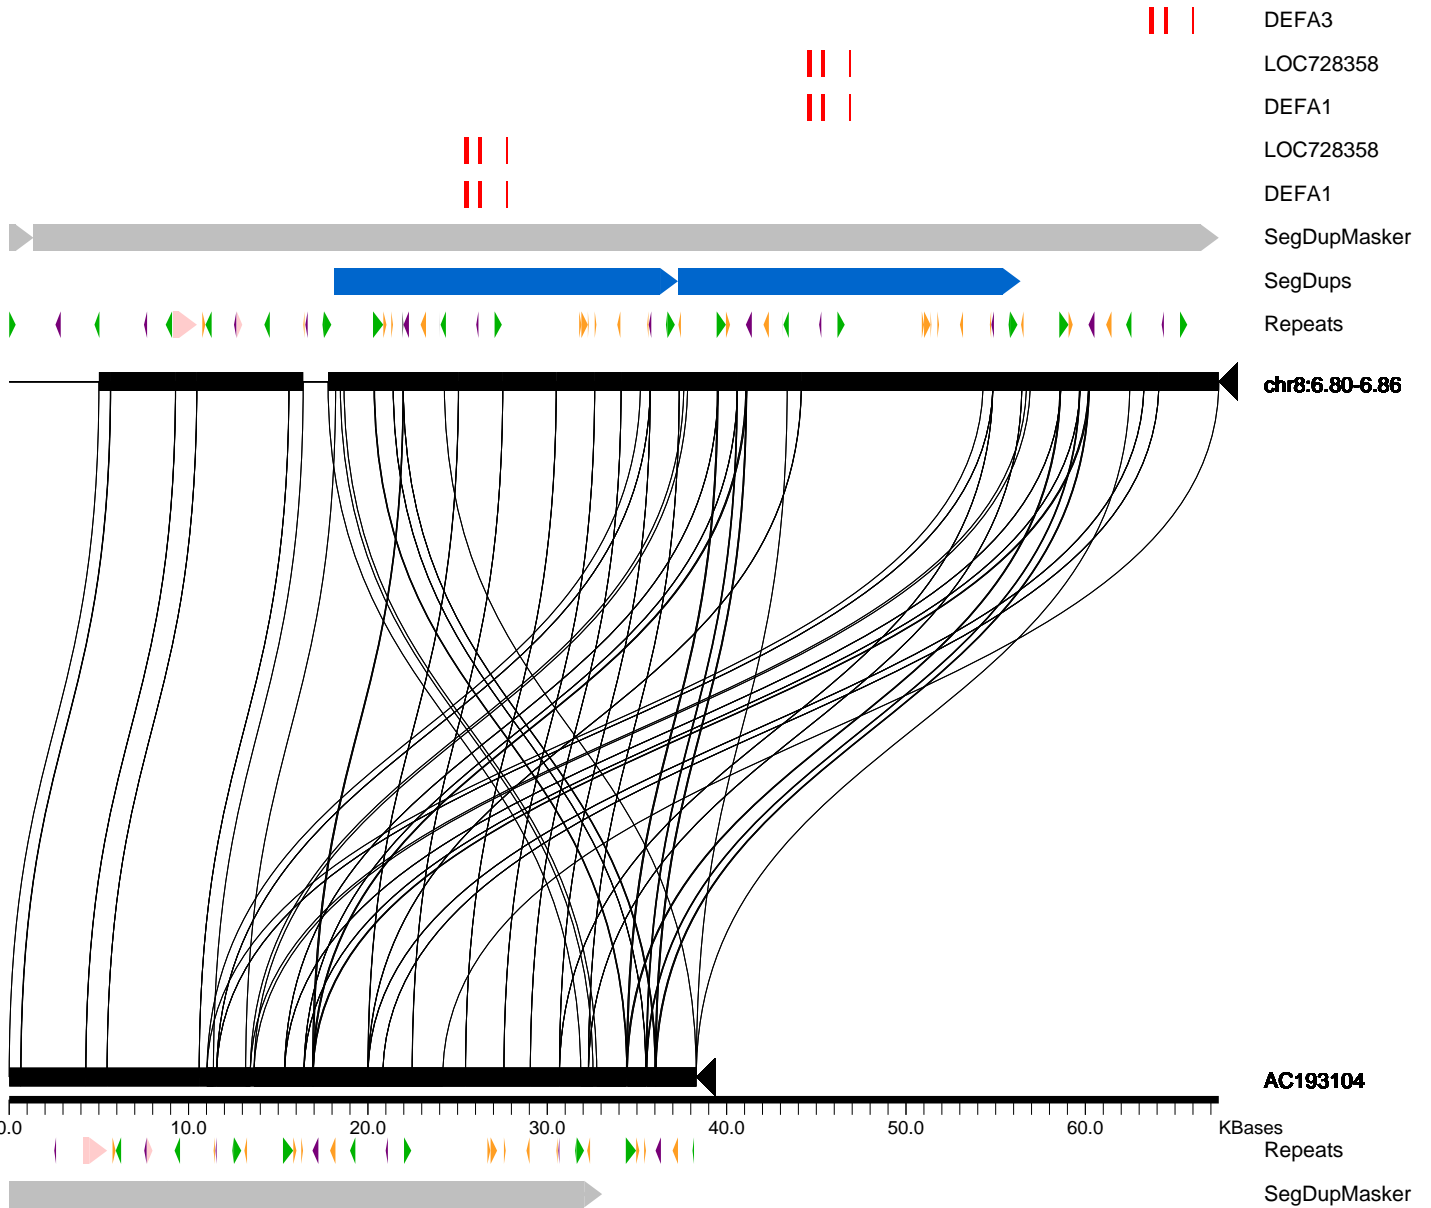



Clone: WIBR2-3693I08 Accession: AC193173

ESP Prediction: INV Validation: V Mechanism: ?

Other Simple Repeat Low Complexity DNA LTR LINE SINE

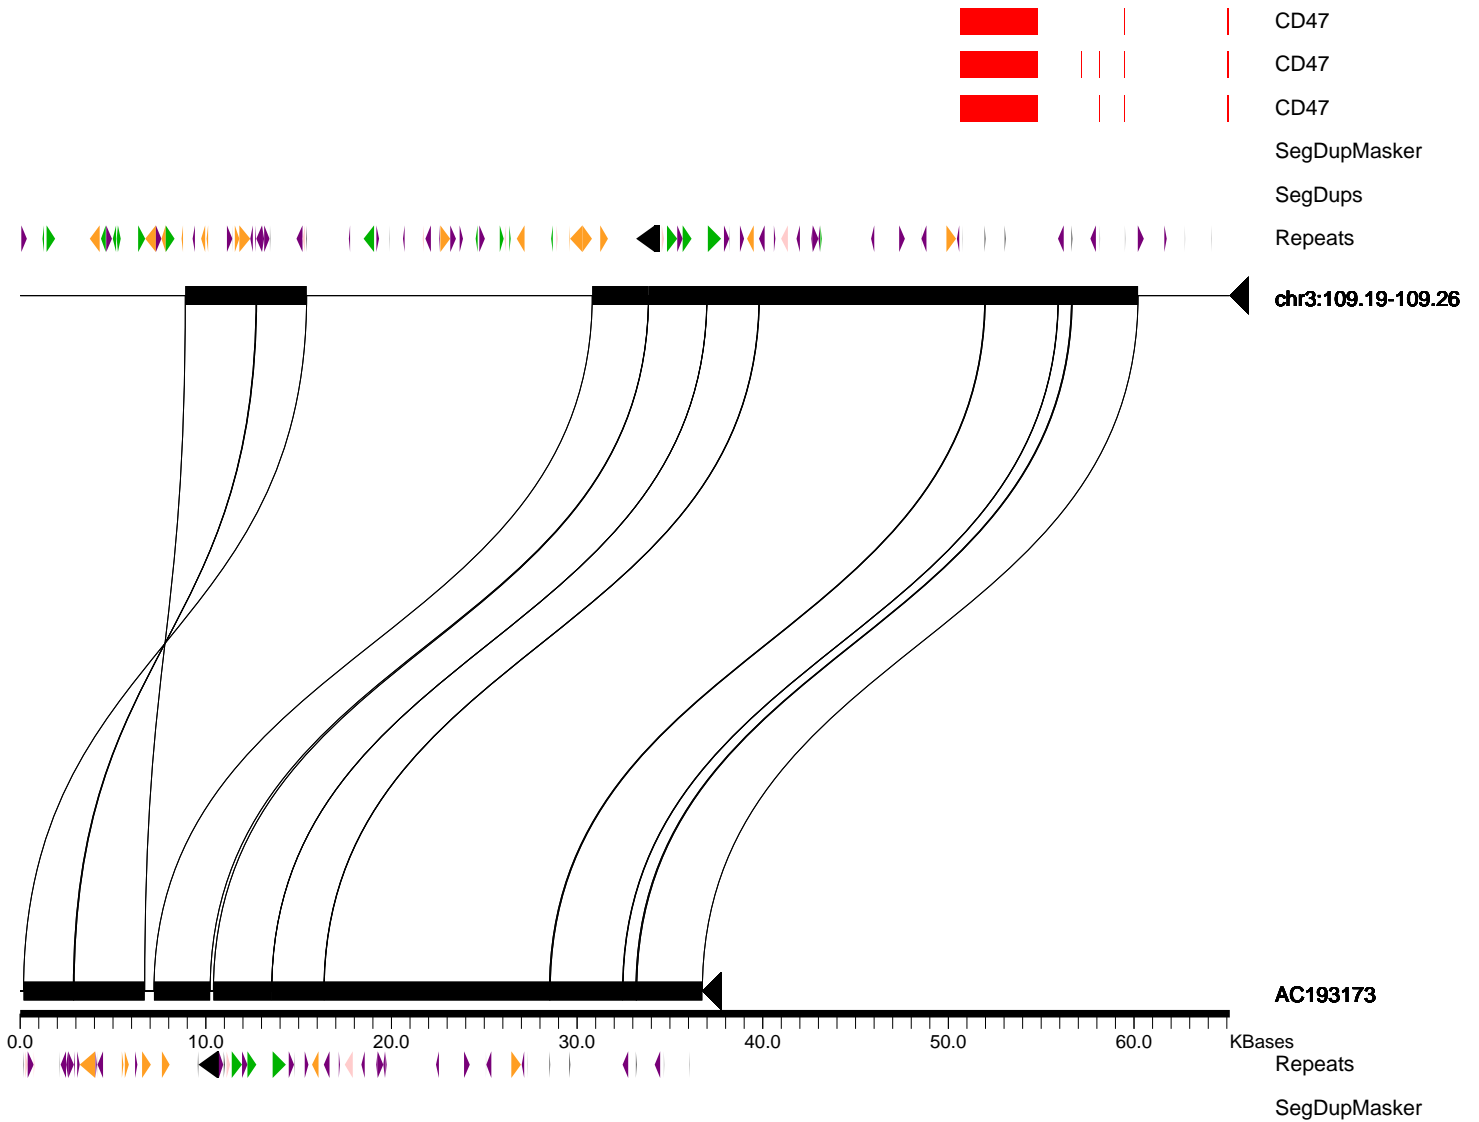

Clone: WIBR2-3773J14 Accession: AC195778

ESP Prediction: INV Validation: U Mechanism: Not finished

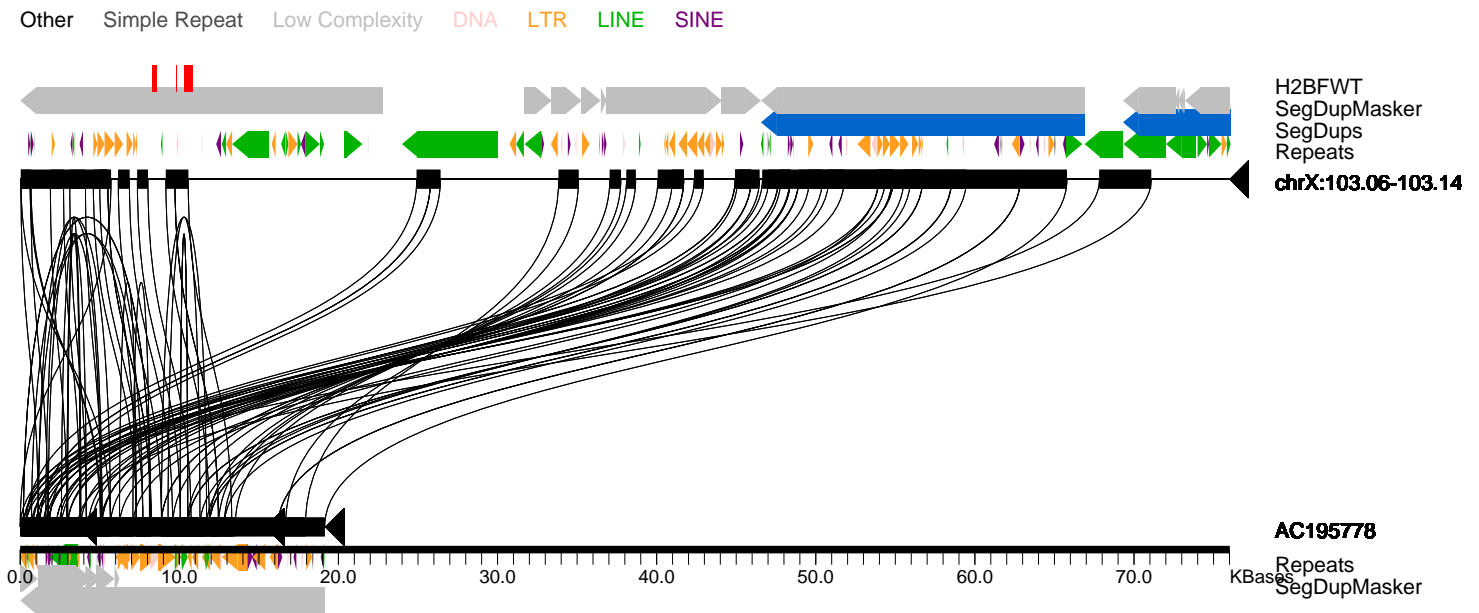

Clone: WIBR2-3468M06 Accession: AC193171  
ESP Prediction: INV Validation: U Mechanism: ?

SREBF1  
RAI1  
PENT  
PENT  
PENT  
RASD1  
MED9  
NT5M  
COPS3  
FLCN  
FLCN  
LOC201164  
M-RIP  
M-RIP  
TNFRSF13B

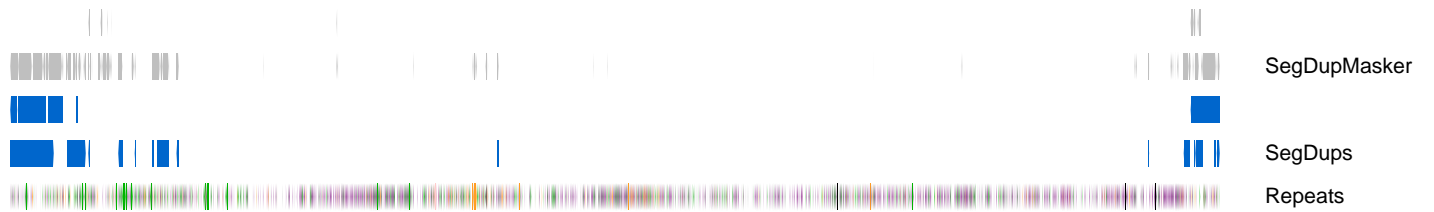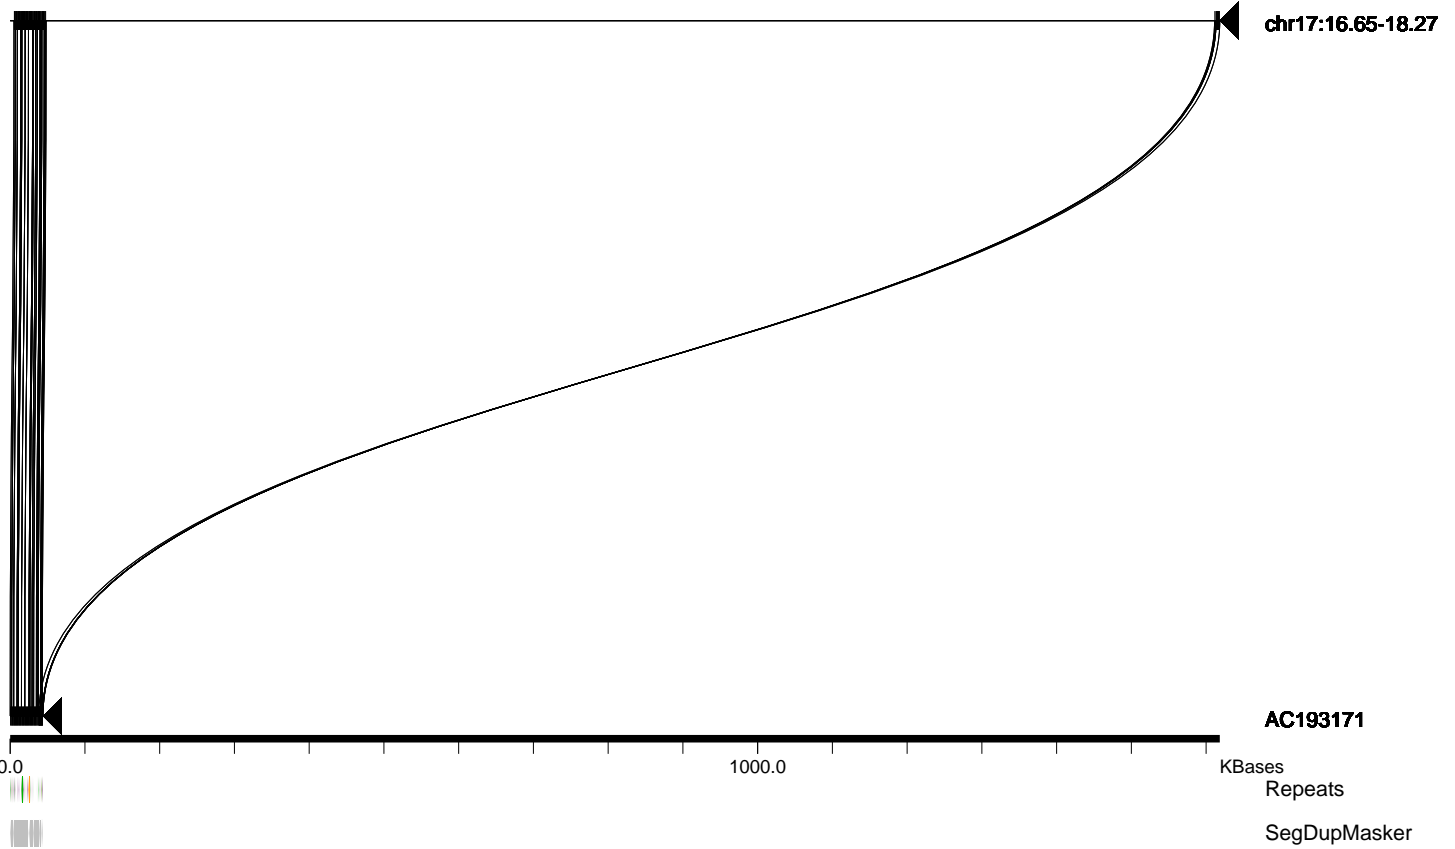

Clone: WIBR2-3460F13 Accession: AC213213

ESP Prediction: S Validation: U Mechanism: Not finished

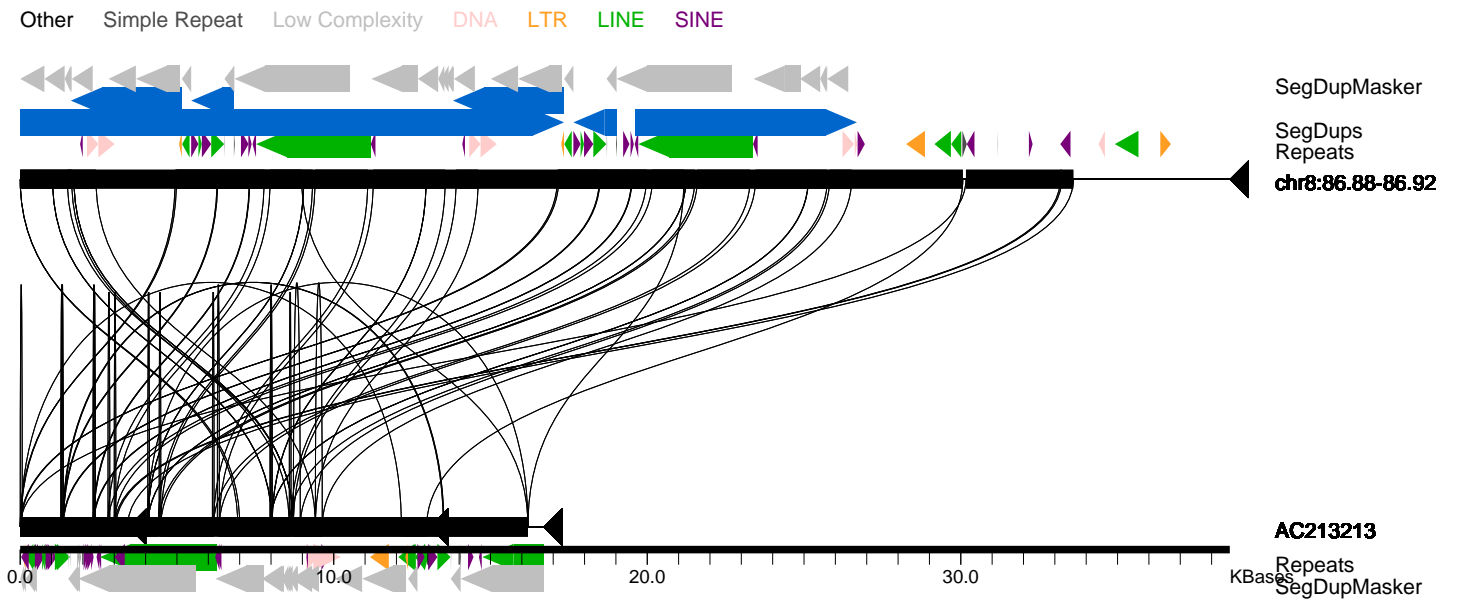

Clone: WIBR2-0496O16 Accession: AC195741

ESP Prediction: S Validation: U Mechanism: Not finished

Other Simple Repeat Low Complexity DNA LTR LINE SINE

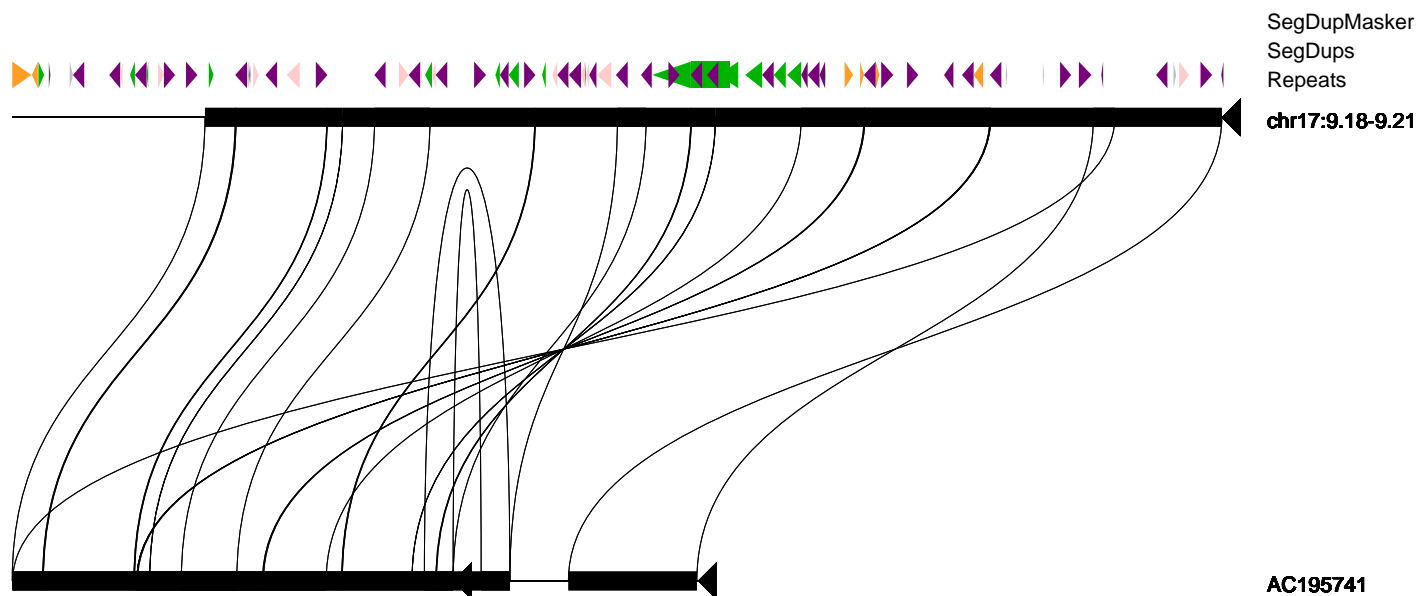

Clone: WIBR2-3757D21 Accession: AC193109

ESP Prediction: S Validation: U Mechanism:

Other Simple Repeat Low Complexity DNA LTR LINE SINE

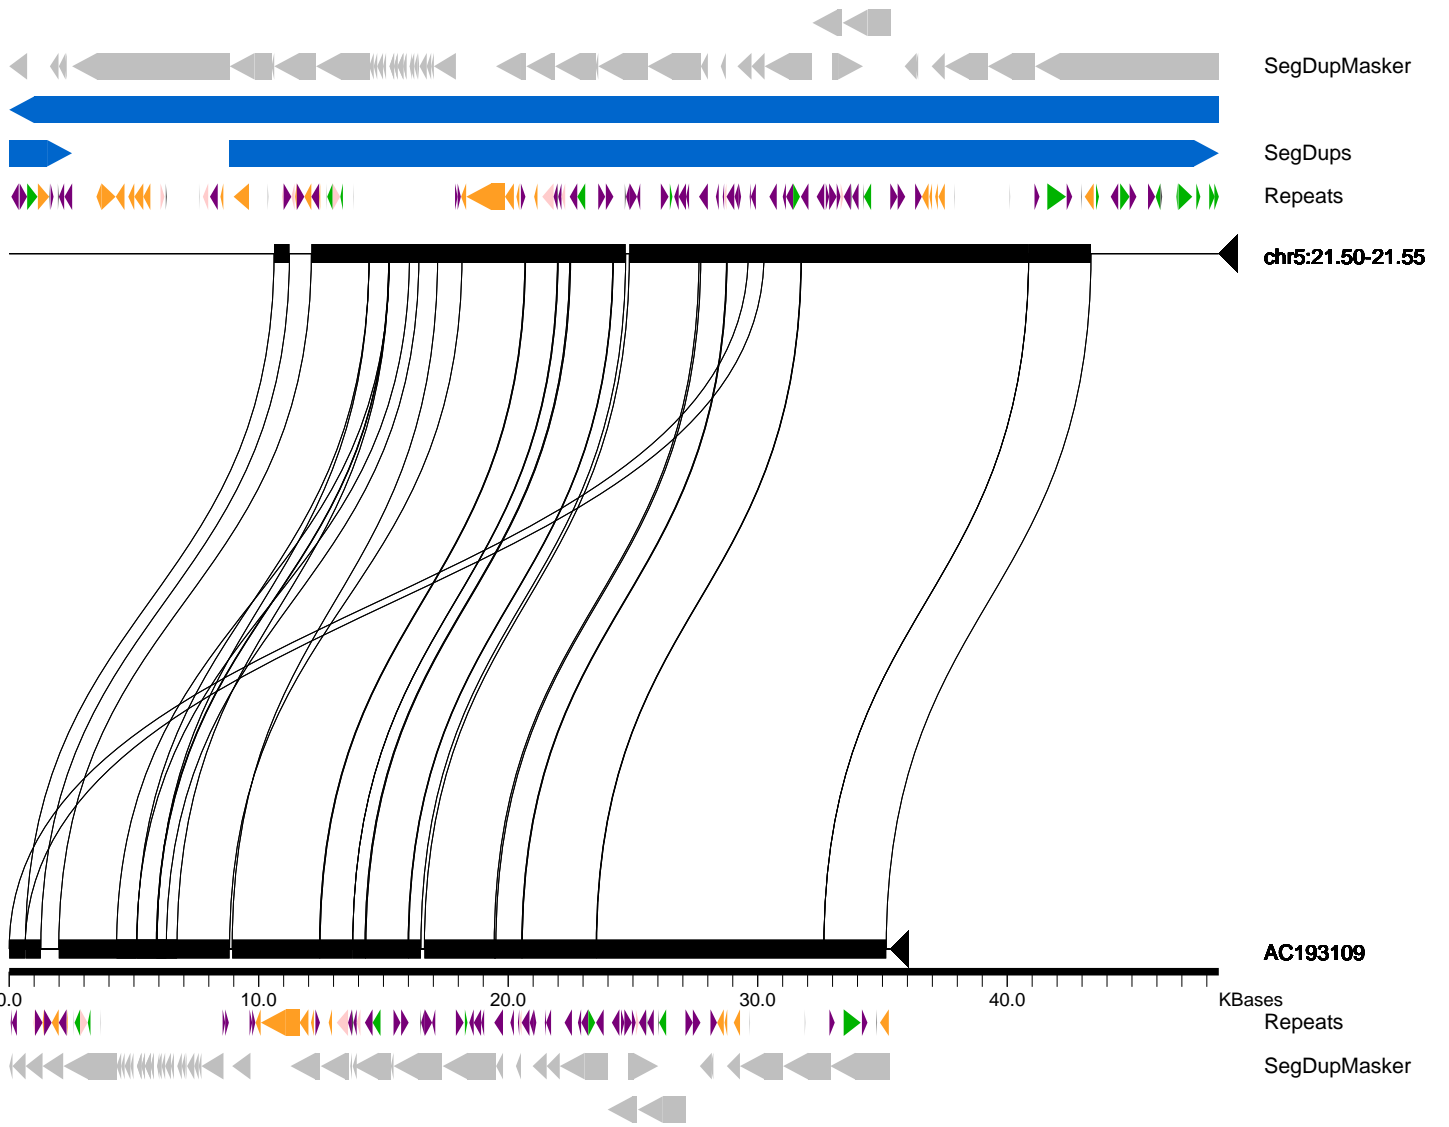

Clone: WIBR2-3254M22 Accession: AC196562

ESP Prediction: S Validation: U Mechanism:

Other Simple Repeat Low Complexity DNA LTR LINE SINE

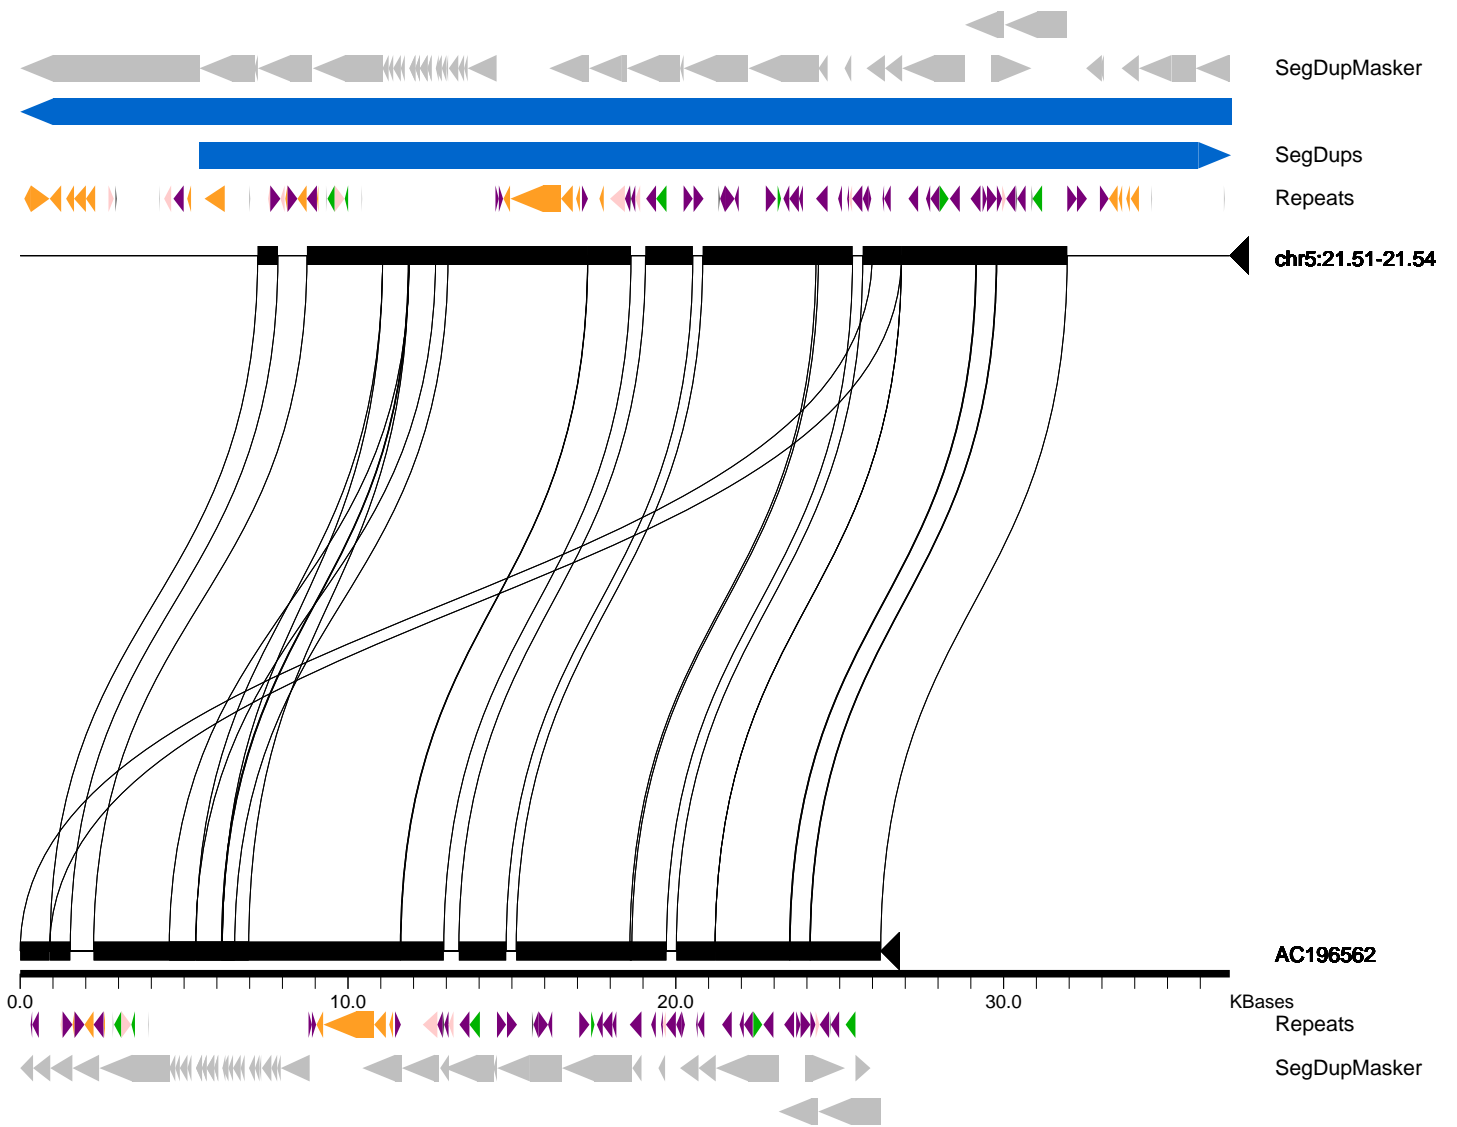

Clone: WIBR2-0537113 Accession: AC195753

ESP Prediction: INV Validation: U Mechanism: Not finished

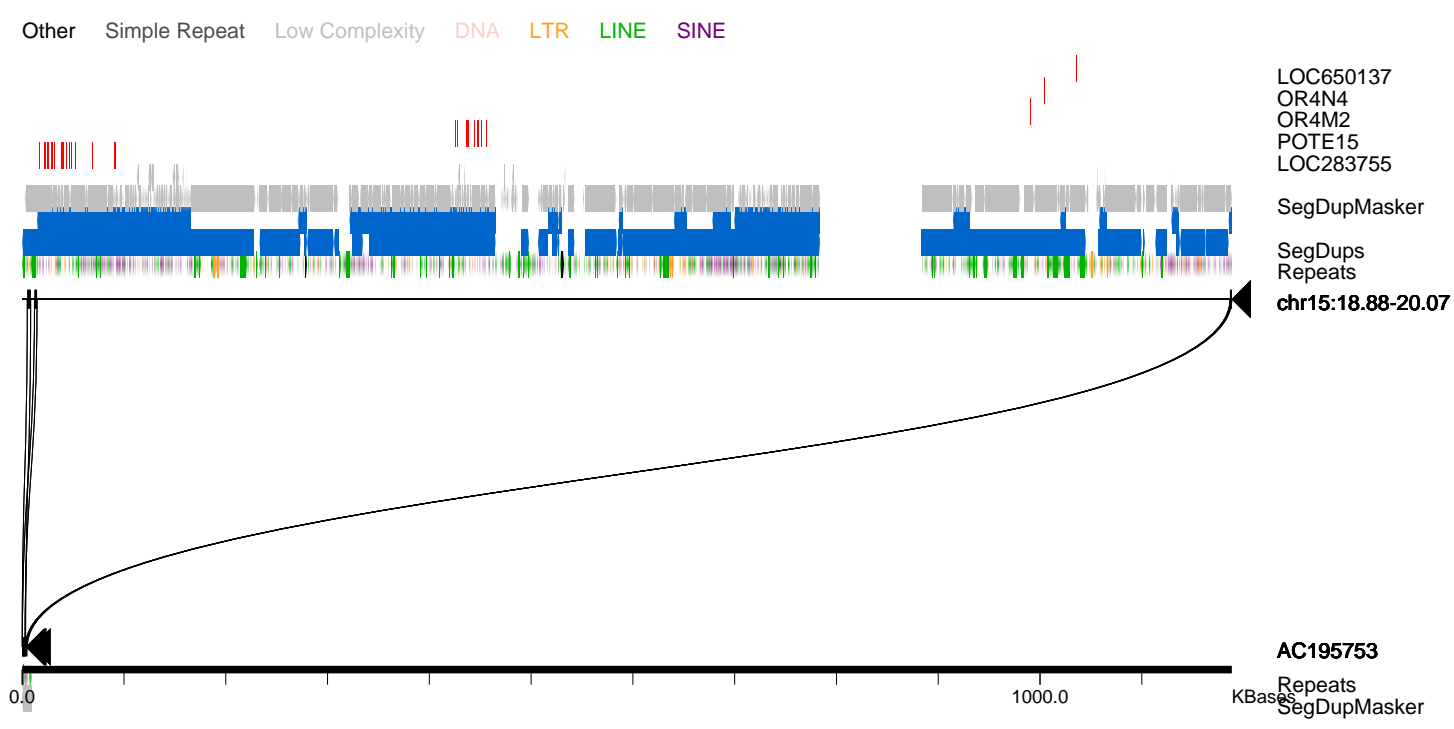



Clone: WIBR2-0765P15 Accession: AC195746

ESP Prediction: S Validation: U Mechanism: ? Not finished

Other Simple Repeat Low Complexity DNA LTR LINE SINE

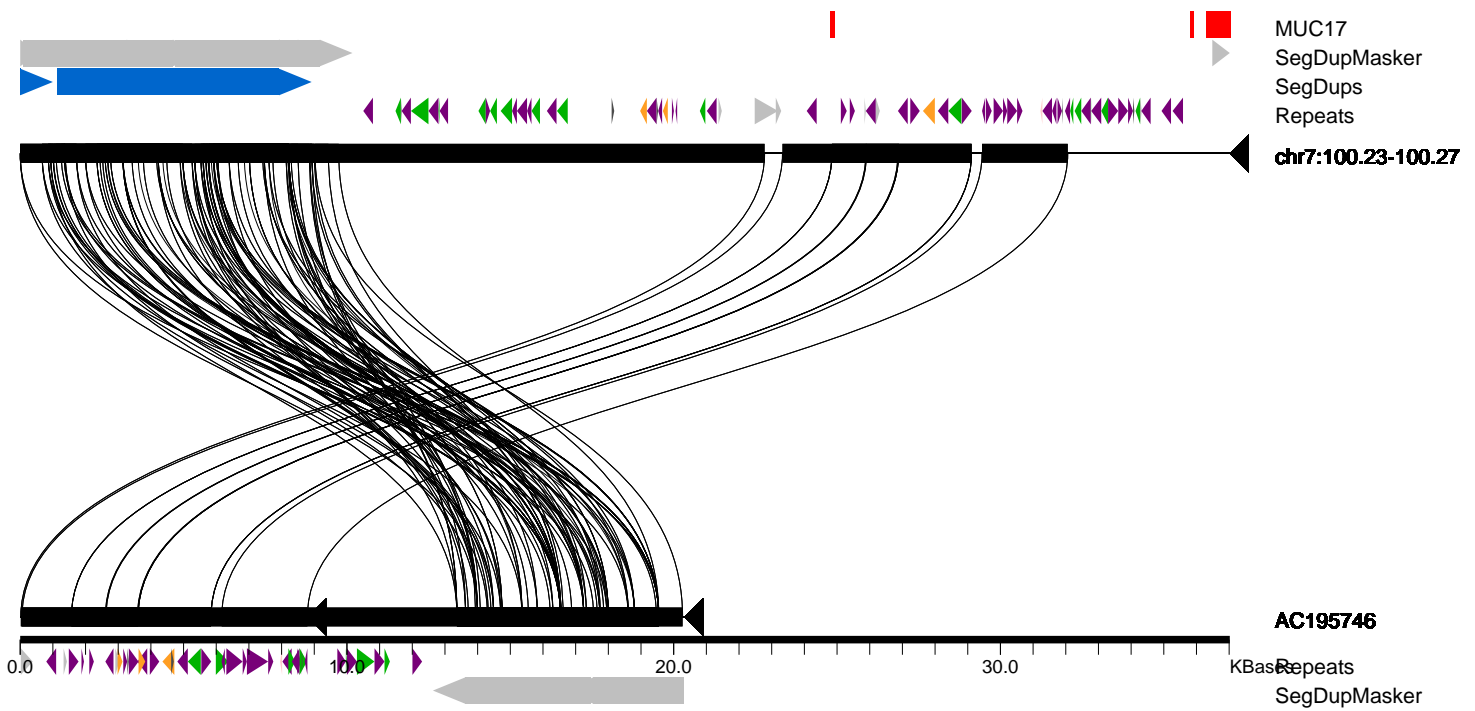

Clone: WIBR2-0747N19 Accession: AC193091

ESP Prediction: S Validation: U Mechanism: ? Not finished

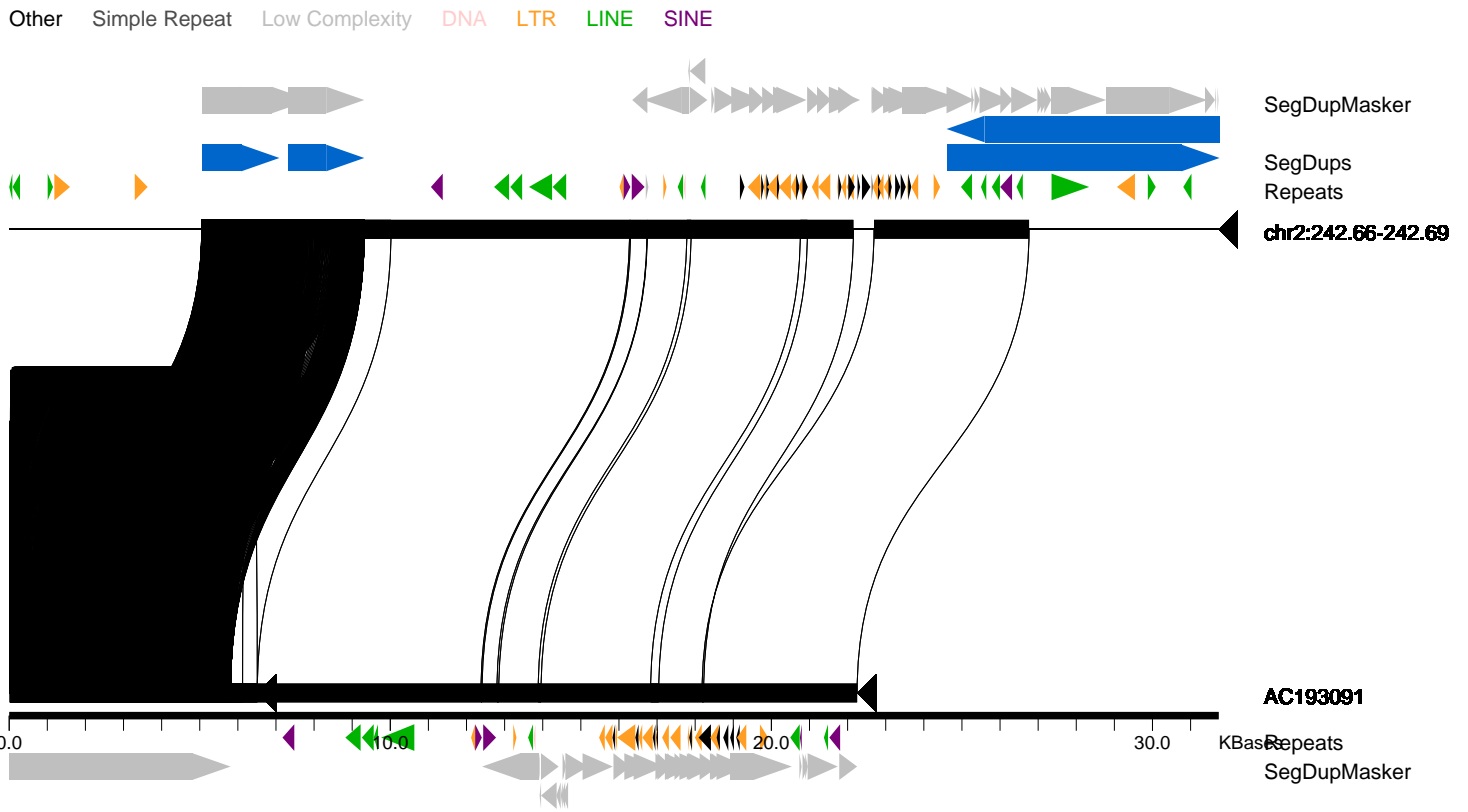

Clone: WIBR2-0417H12 Accession: AC193111

ESP Prediction: B Validation: U Mechanism: ? Not finished

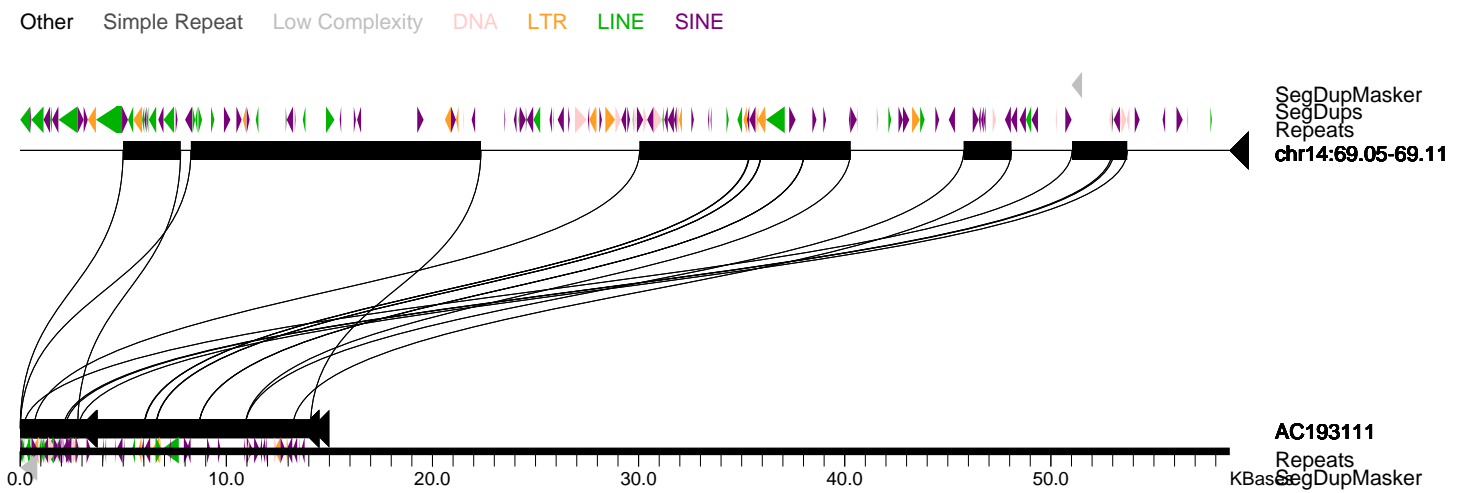

Clone: WIBR2-0912P09 Accession: AC193116

ESP Prediction: B Validation: U,complex Mechanism:

Other Simple Repeat Low Complexity DNA LTR LINE SINE

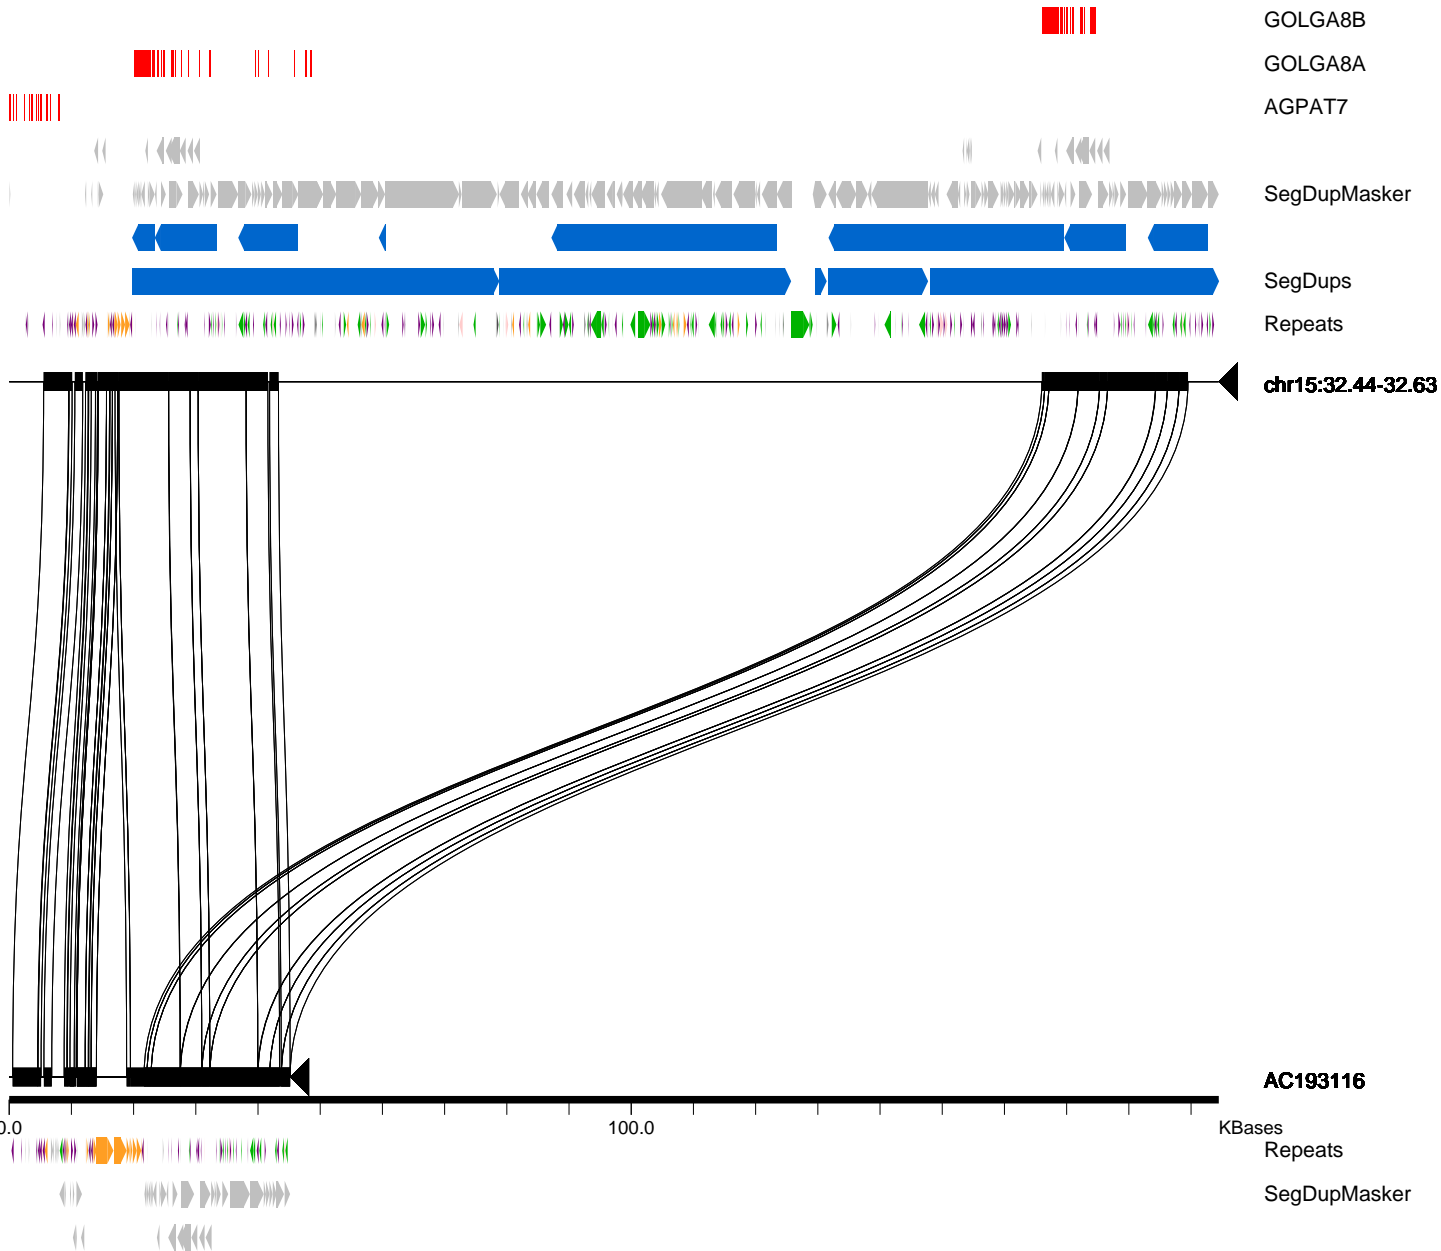

Clone: WIBR2-2761K12 Accession: AC195763

ESP Prediction: B Validation: U Mechanism:

Other Simple Repeat Low Complexity DNA LTR LINE SINE

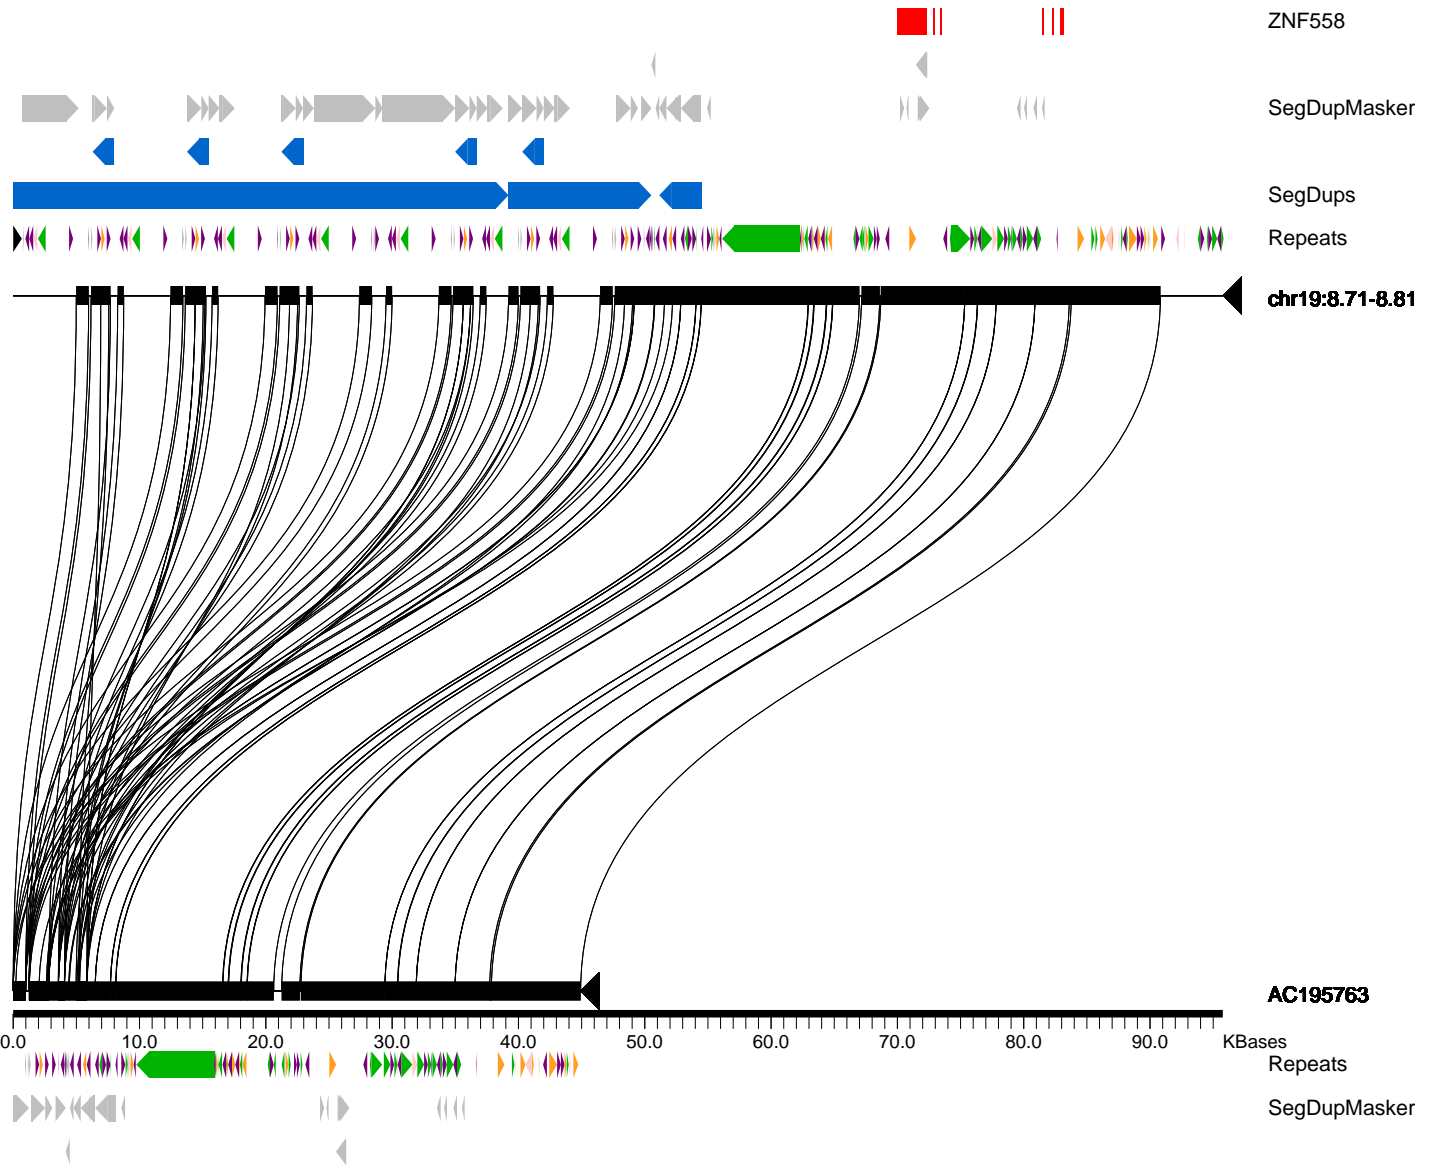

Clone: WIBR2-2369P05 Accession: AC193099

ESP Prediction: B Validation: U Mechanism: Not finished

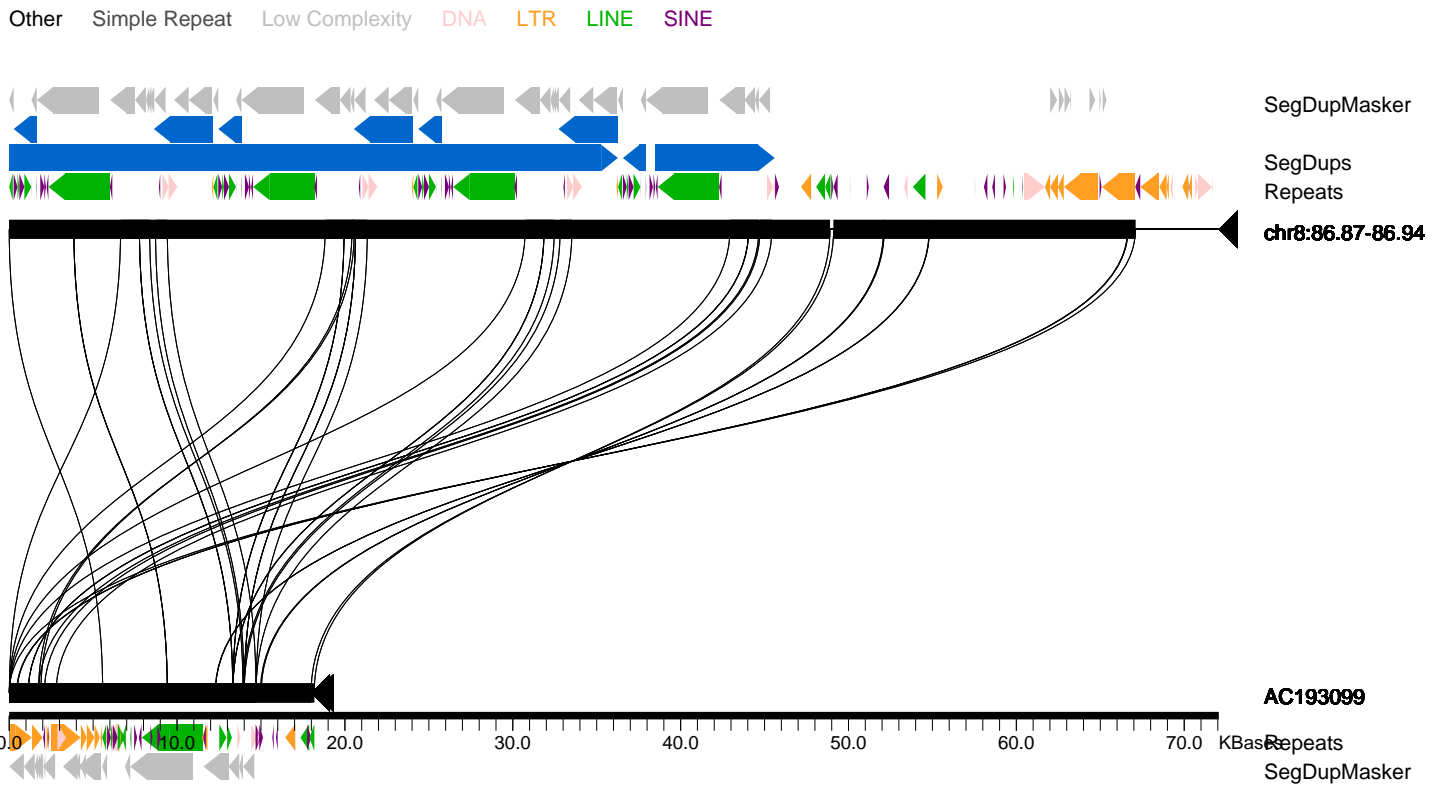

Clone: WIBR2-2623N04 Accession: AC193148

ESP Prediction: INV Validation: U Mechanism: Not finished

Other Simple Repeat Low Complexity DNA LTR LINE SINE

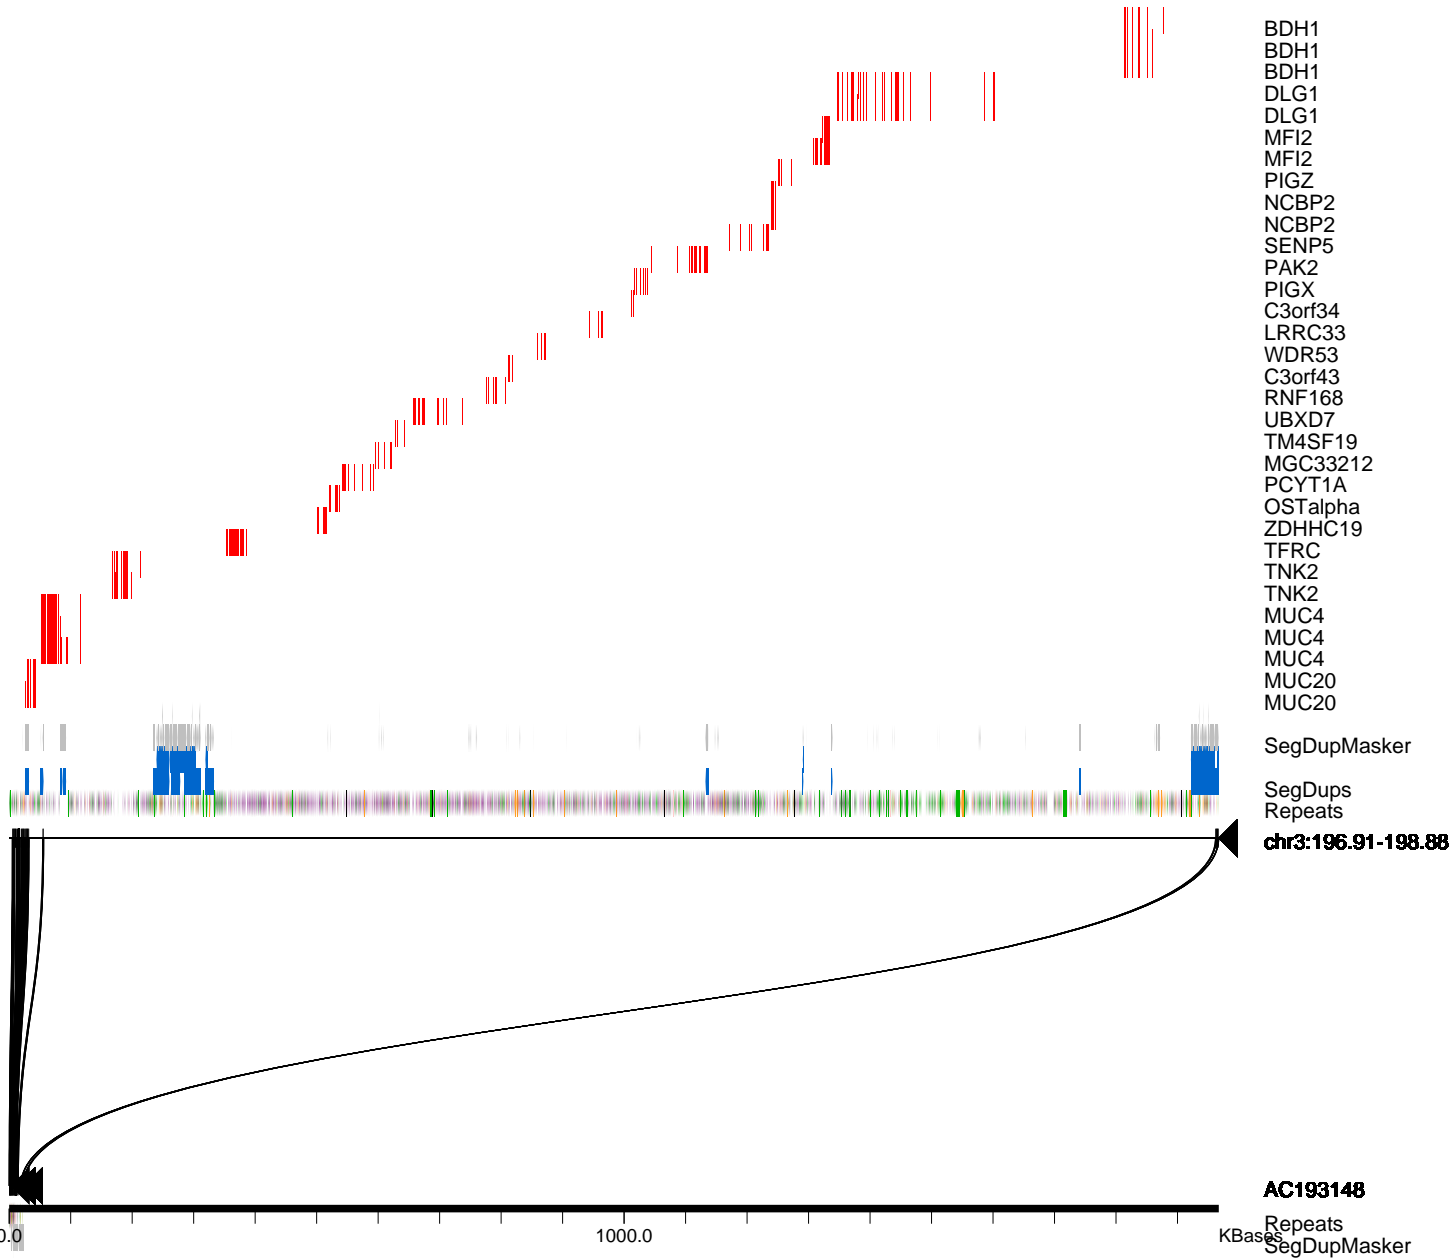

Clone: WIBR2-2663J03 Accession: AC195762

ESP Prediction: INV Validation: U Mechanism: Not finished

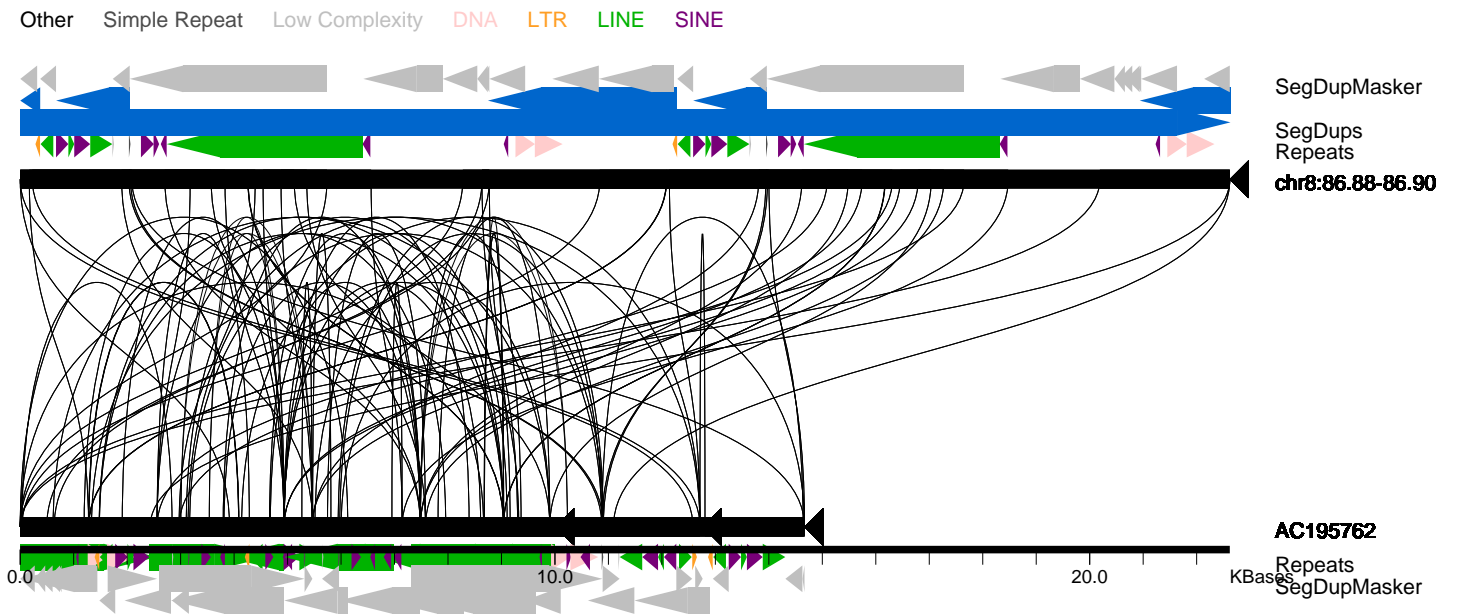



Clone: WIBR2-0486E03 Accession: AC213499

ESP Prediction: B Validation: U Mechanism: Not finished

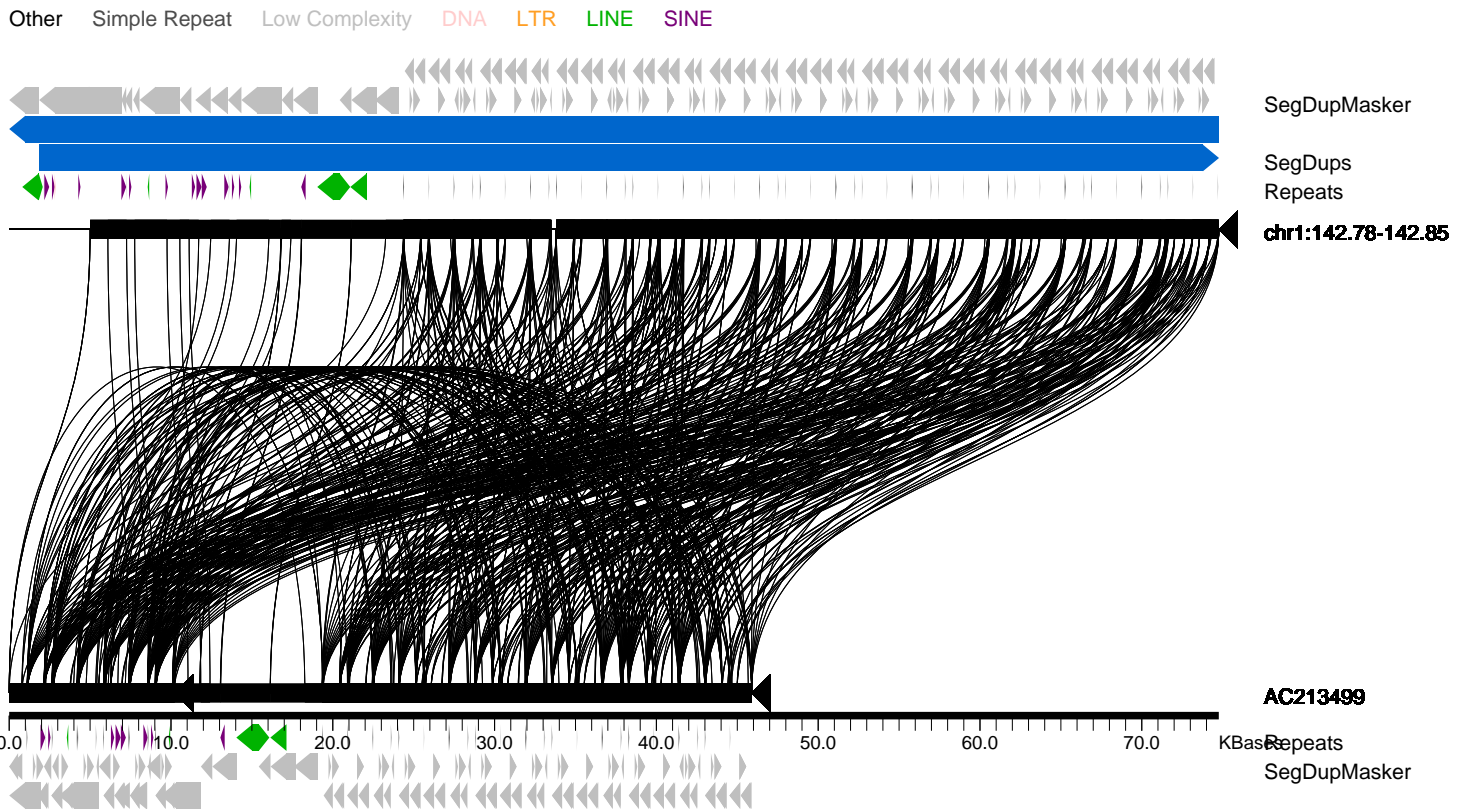

Clone: WIBR2-1412A14 Accession: AC196705

ESP Prediction: S Validation: U Mechanism: Not finished

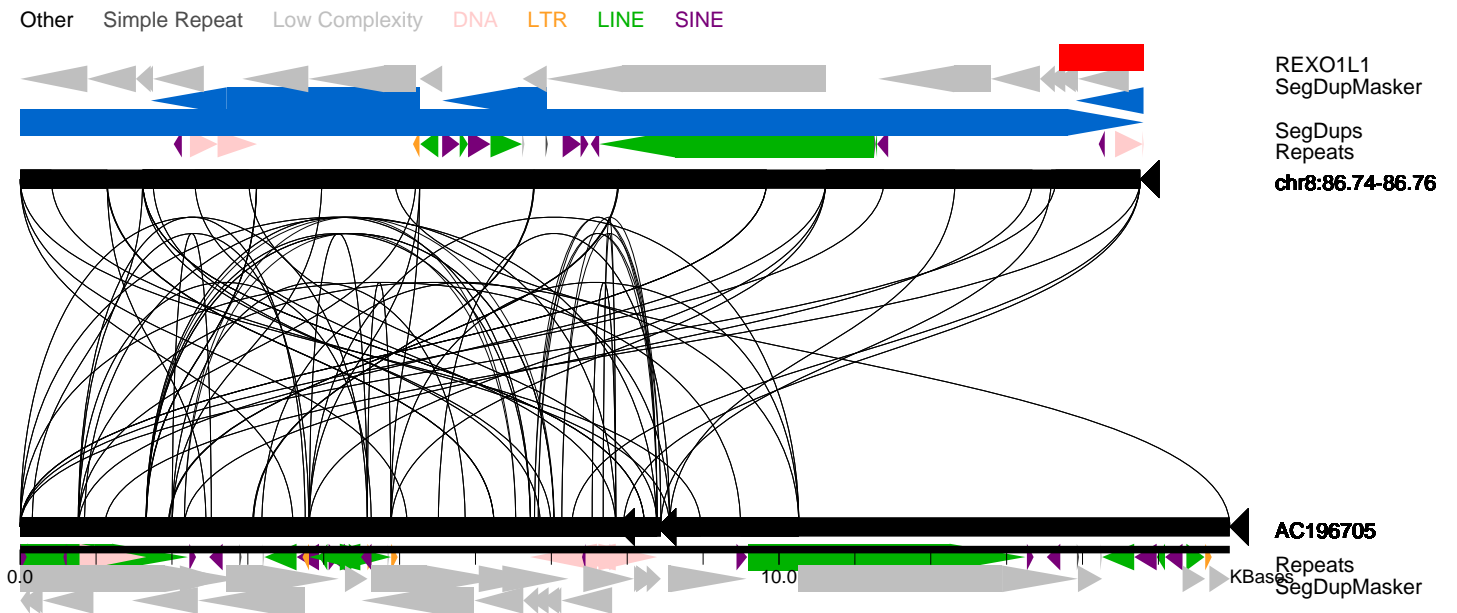

Clone: WIBR2-1172K20 Accession: AC195736

ESP Prediction: S Validation: U Mechanism:

Other Simple Repeat Low Complexity DNA LTR LINE SINE

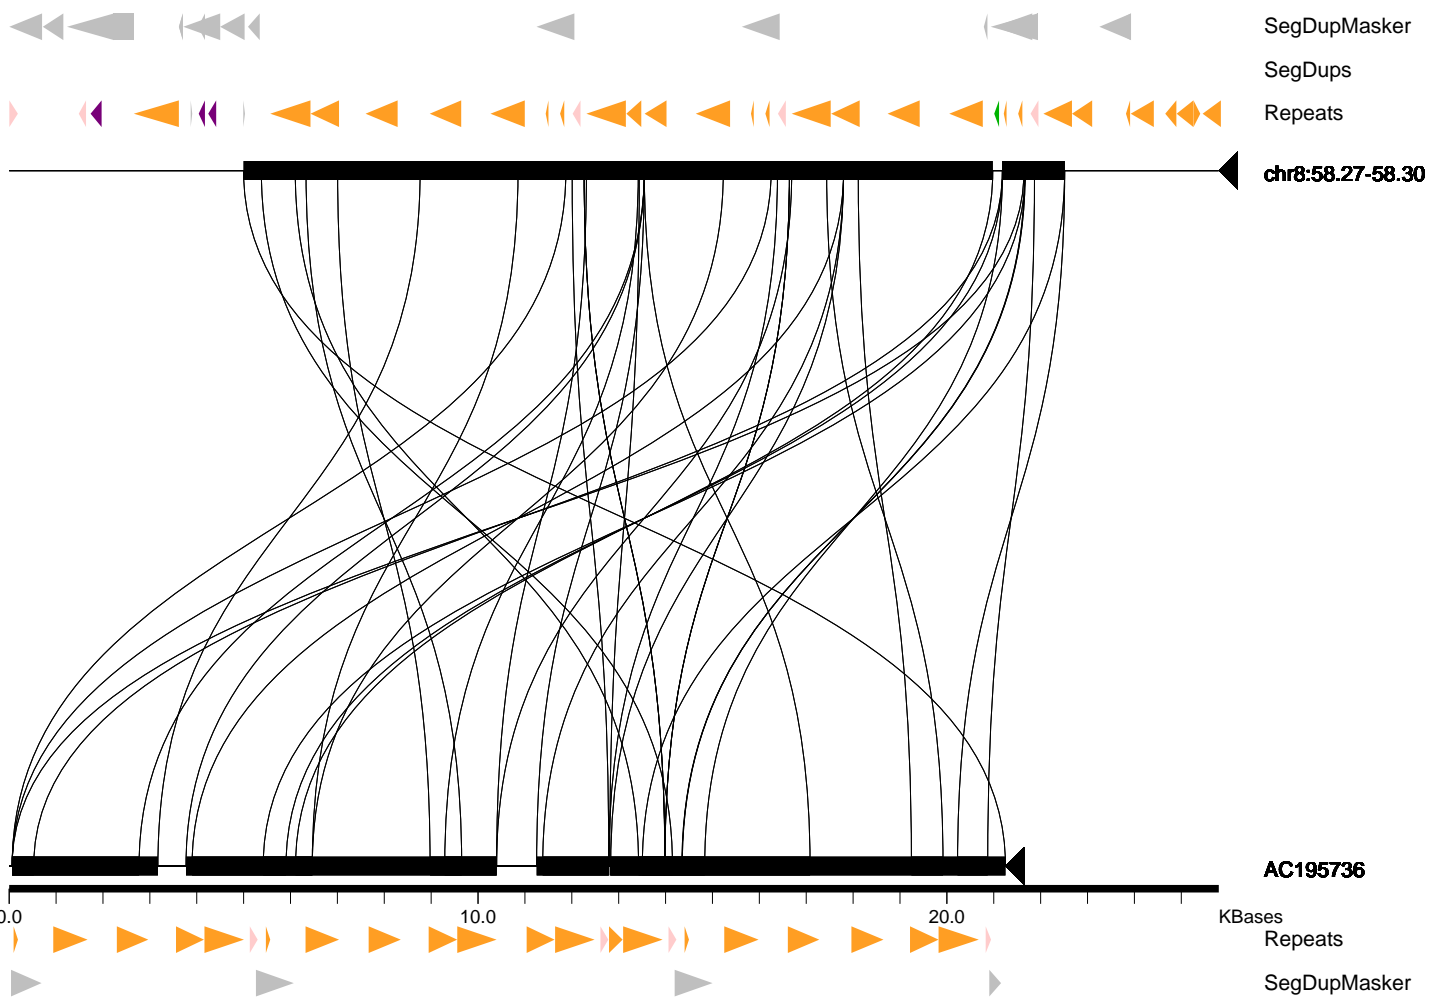

Clone: WIBR2-0932M18 Accession: AC193243

ESP Prediction: INV Validation: U Mechanism: Not finished

Other Simple Repeat Low Complexity DNA LTR LINE SINE

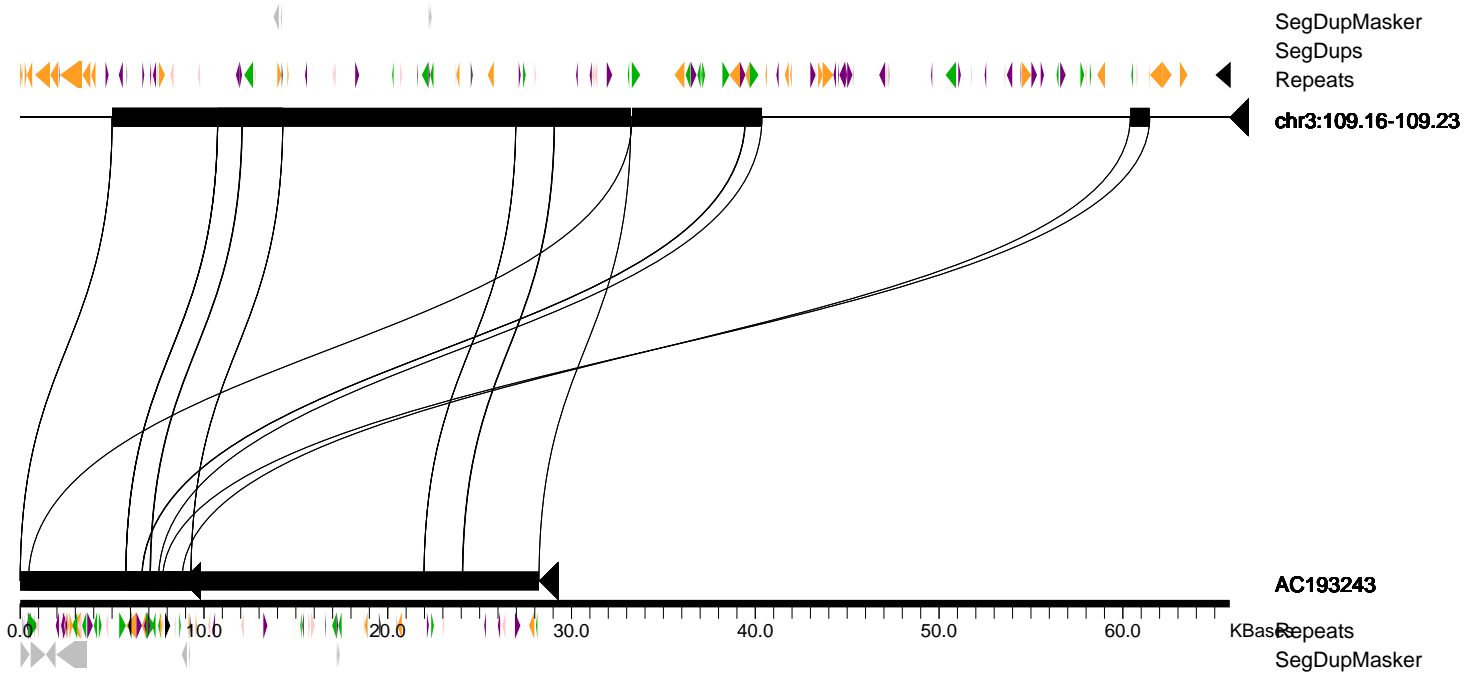

Clone: WIBR2-1854L01 Accession: AC153465

ESP Prediction: S Validation: U Mechanism:

Other Simple Repeat Low Complexity DNA LTR LINE SINE

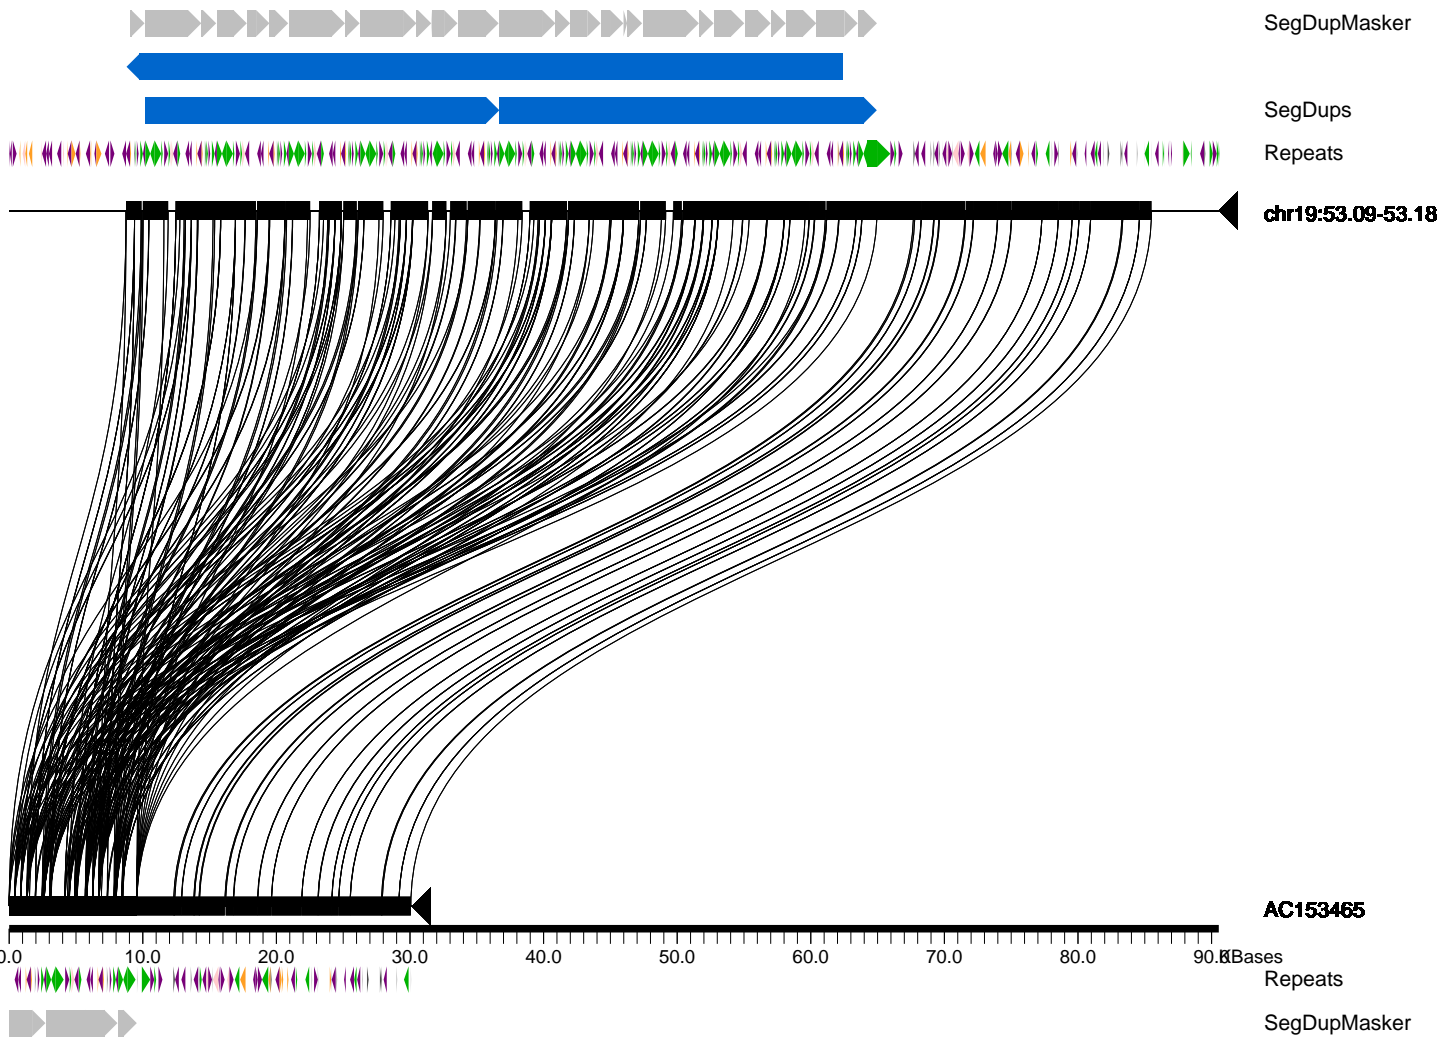

Clone: WIBR2-1427G12 Accession: AC193122

ESP Prediction: B Validation: U Mechanism:

Other Simple Repeat Low Complexity DNA LTR LINE SINE

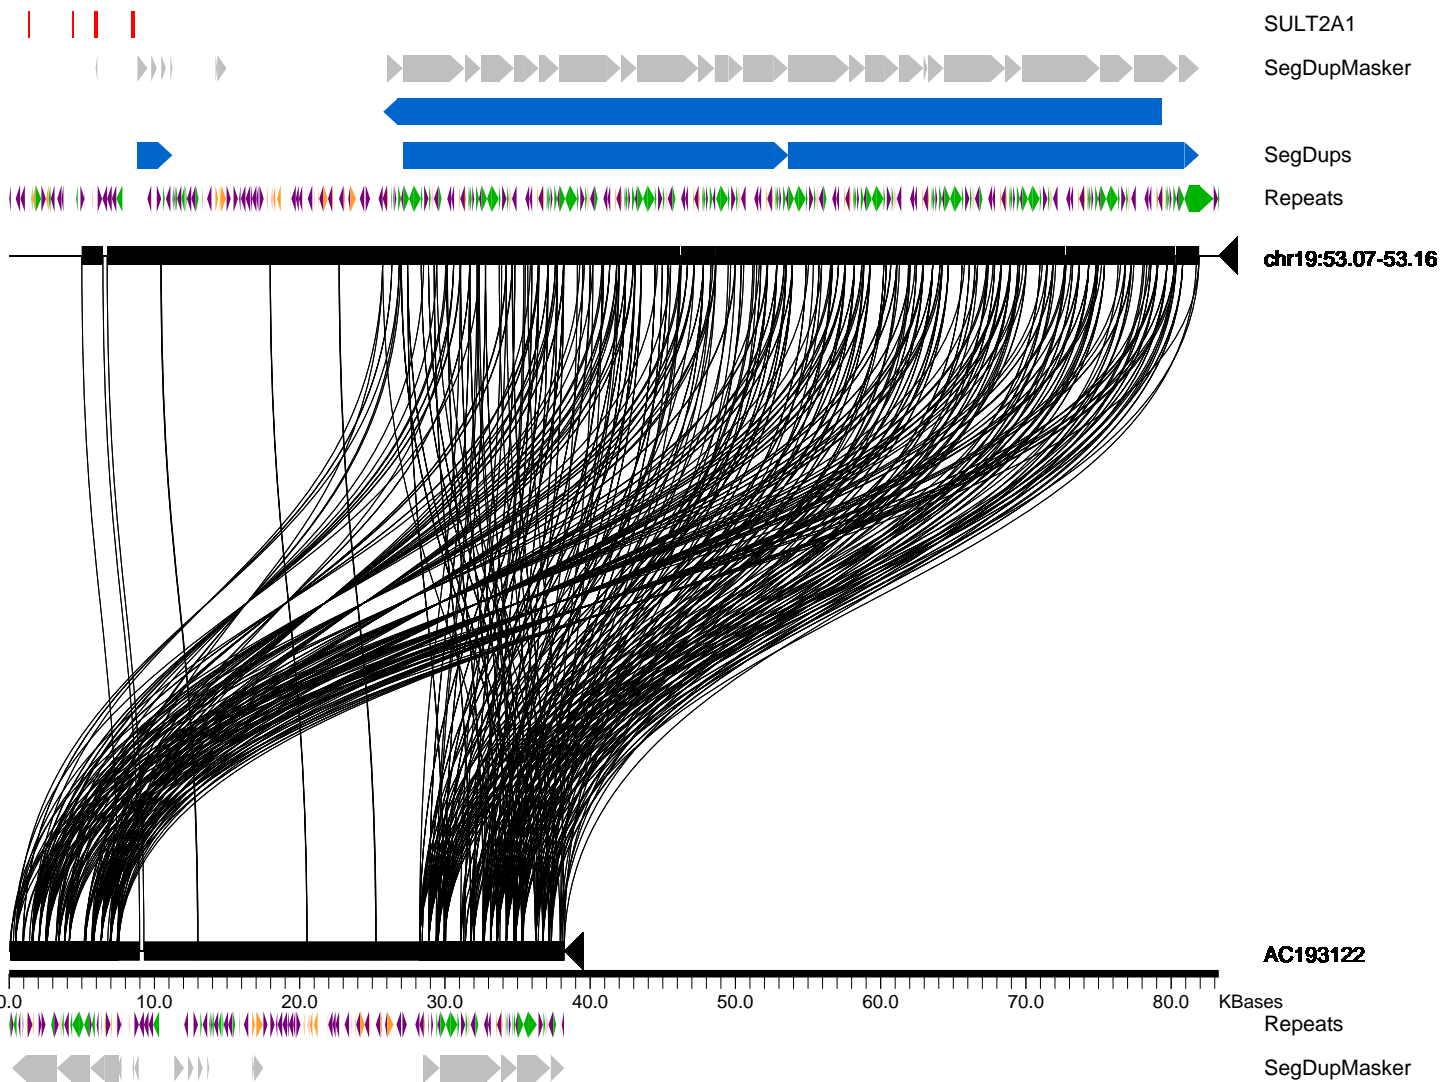

Clone: WIBR2-1949I17 Accession: AC195733

ESP Prediction: S Validation: U Mechanism:

Other Simple Repeat Low Complexity DNA LTR LINE SINE

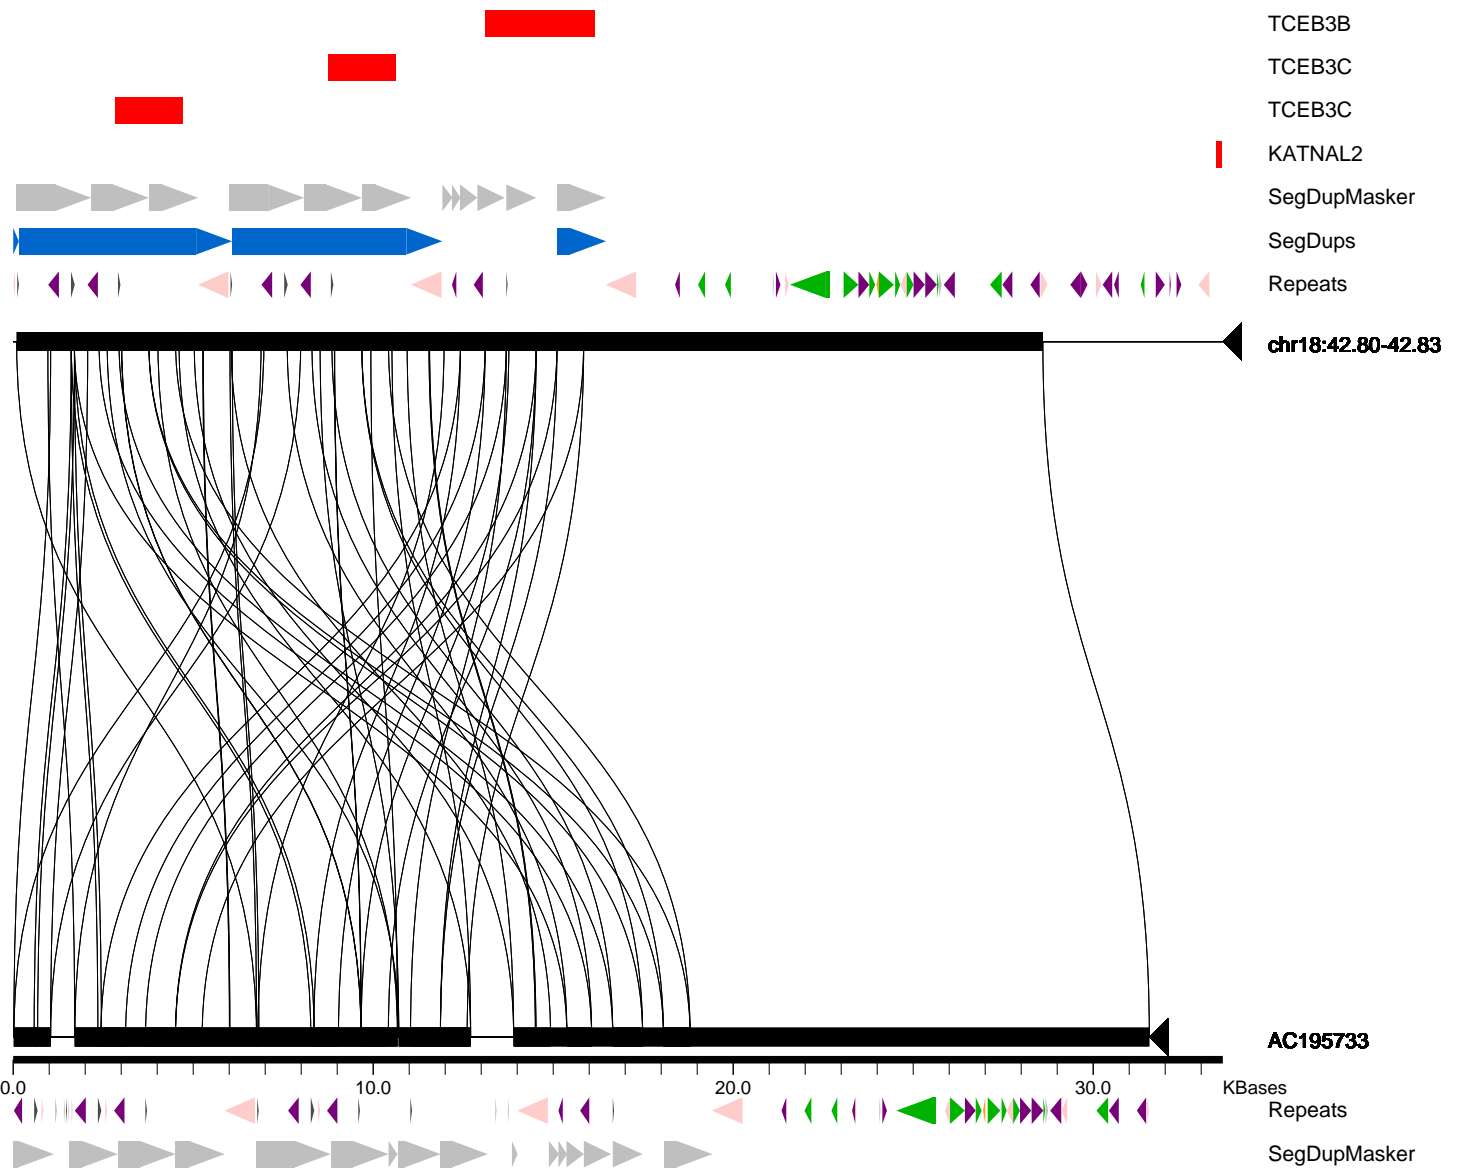

Clone: WIBR2-1795H04 Accession: AC193088

ESP Prediction: S Validation: U,complex Mechanism: Not finished

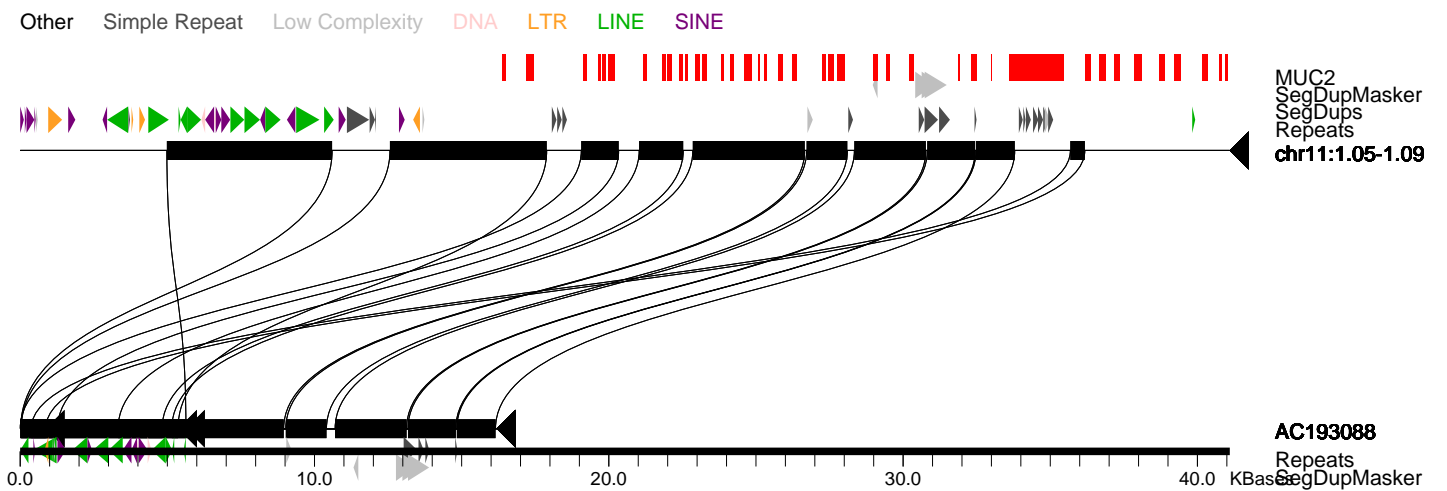



Clone: WIBR2-1737E05 Accession: AC193097

ESP Prediction: S Validation: I Mechanism: ?

Other Simple Repeat Low Complexity DNA LTR LINE SINE

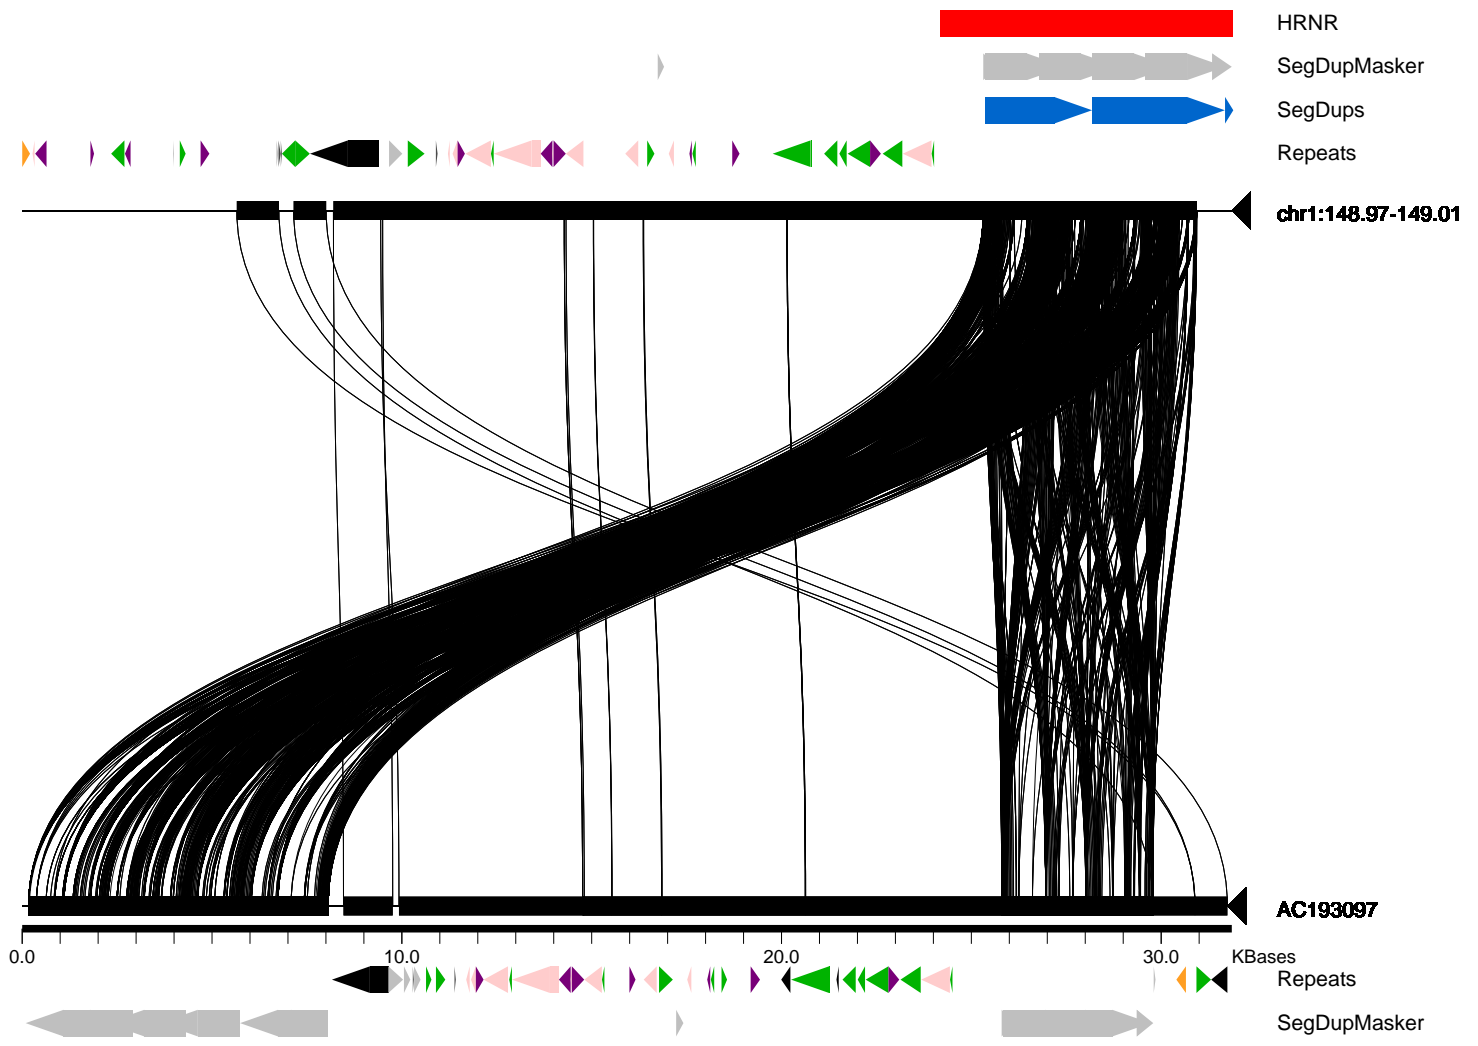

Clone: WIBR2-2035I17 Accession: AC196706

ESP Prediction: S Validation: U Mechanism: Not finished

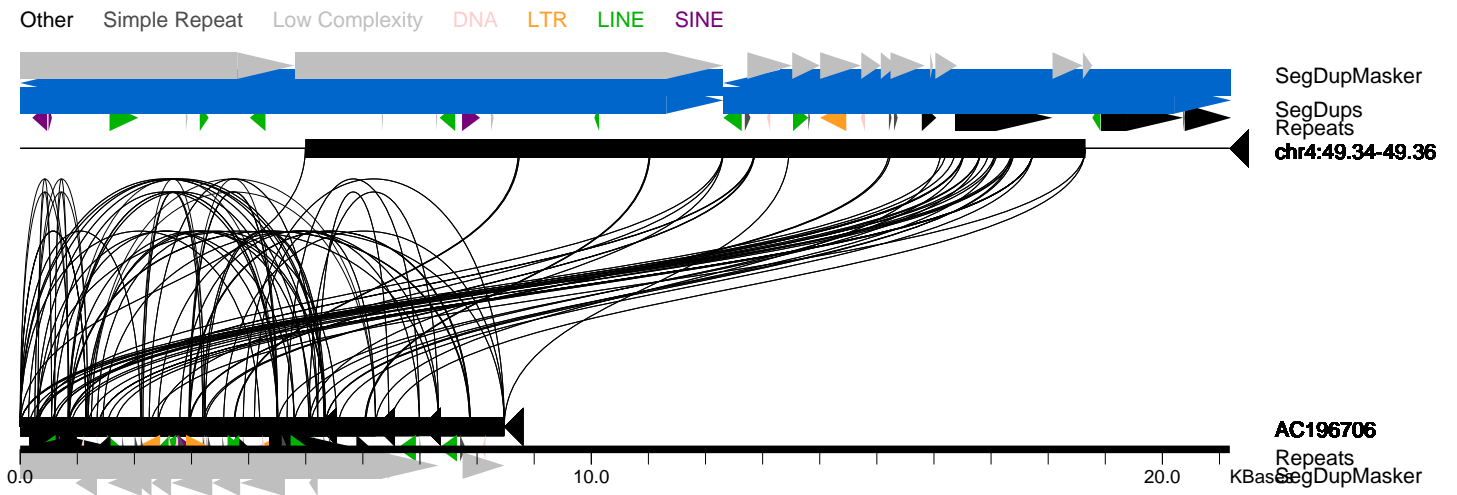

Clone: WIBR2-1826A09 Accession: AC153468

ESP Prediction: B Validation: U Mechanism:

Other Simple Repeat Low Complexity DNA LTR LINE SINE

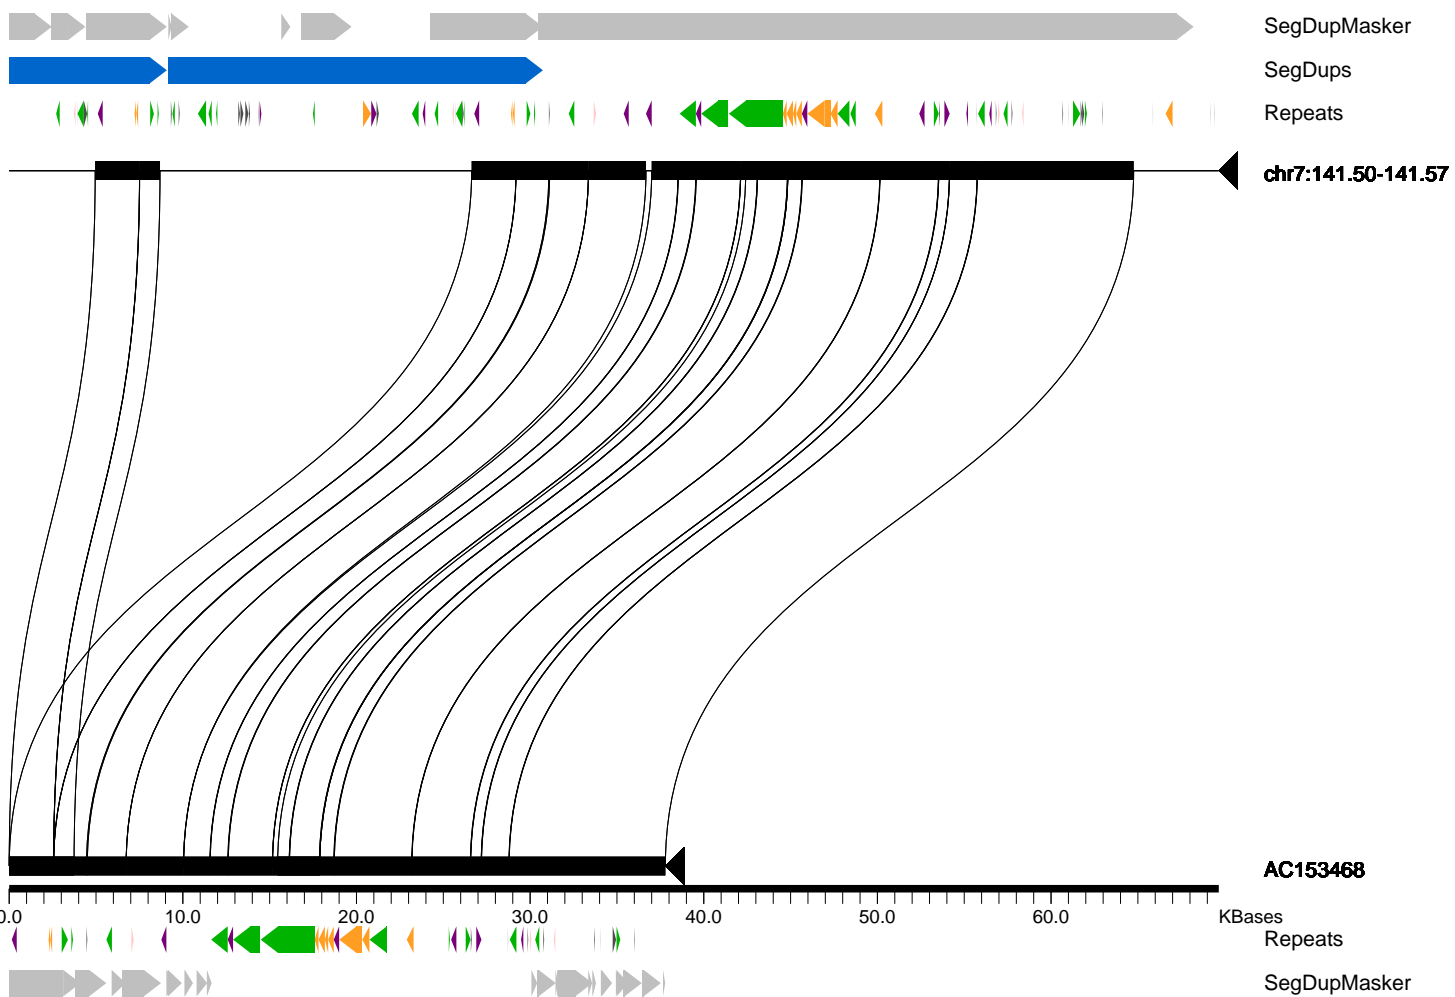

Clone: WIBR2-1923K02 Accession: AC195757

ESP Prediction: S Validation: U Mechanism: Not finished

Other Simple Repeat Low Complexity DNA LTR LINE SINE

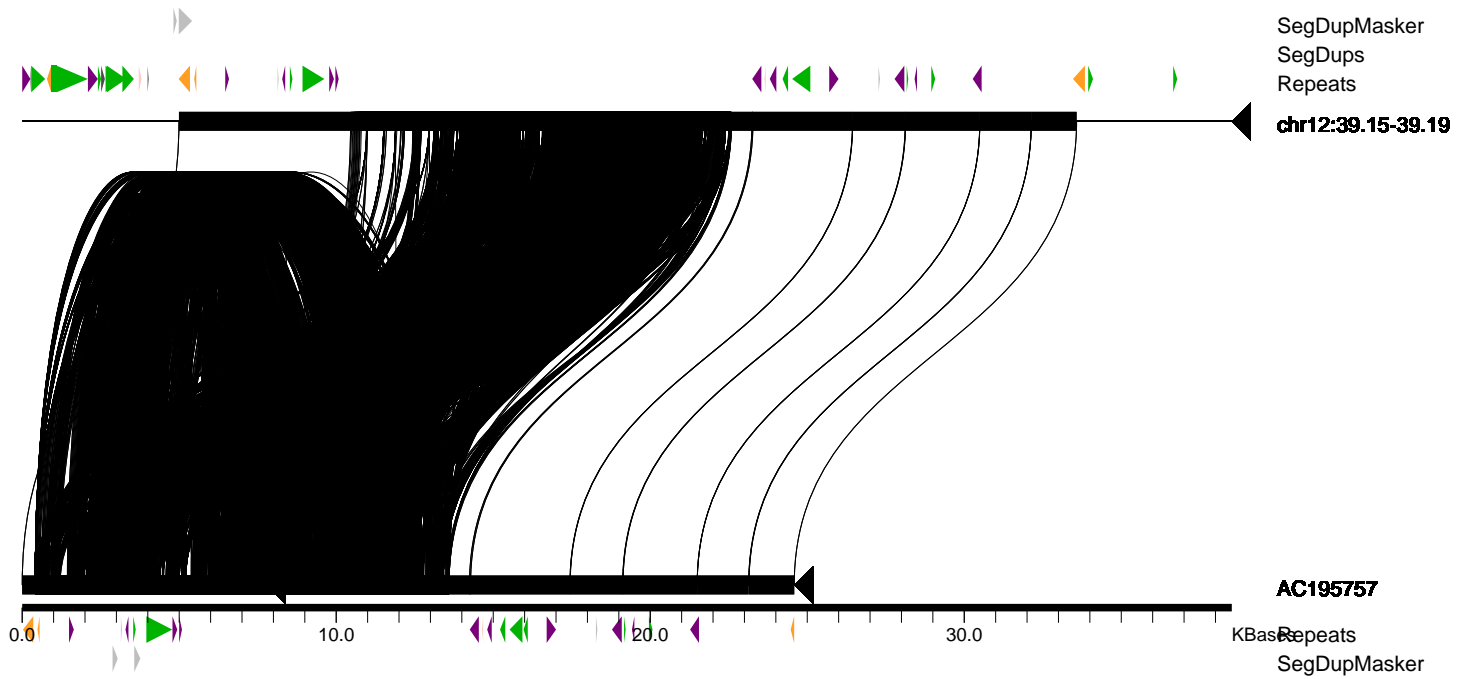

Clone: WIBR2-2162J08 Accession: AC196526

ESP Prediction: INV Validation: U Mechanism:

Other Simple Repeat Low Complexity DNA LTR LINE SINE

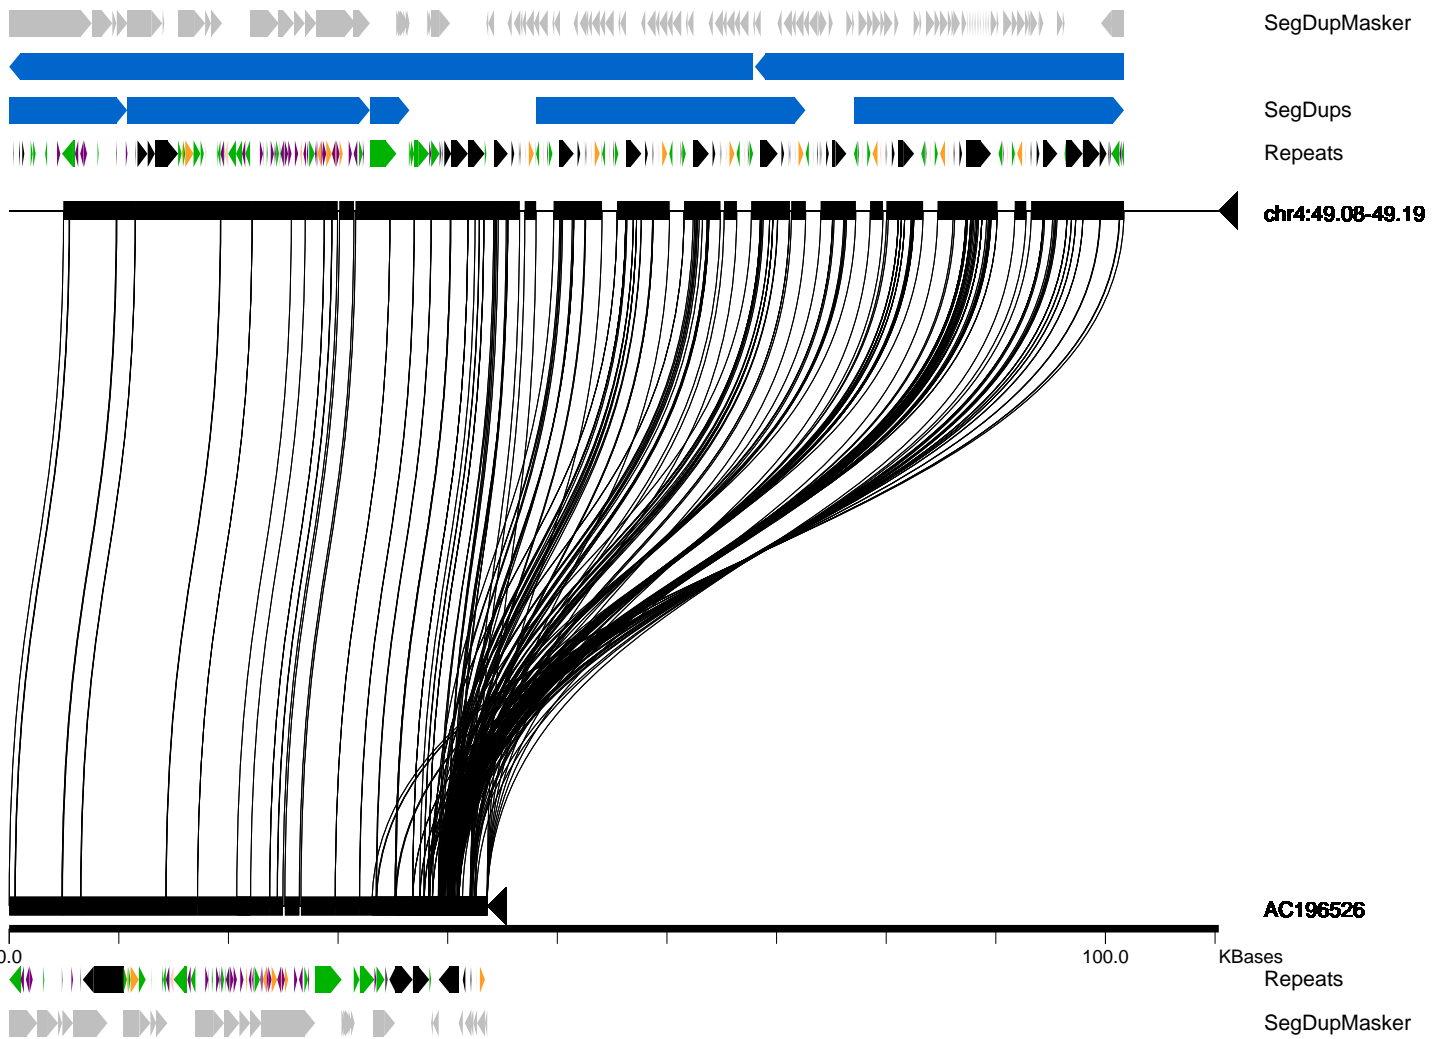

Clone: WIBR2-3543M15 Accession: AC195777

ESP Prediction: B Validation: U Mechanism:

Other Simple Repeat Low Complexity DNA LTR LINE SINE

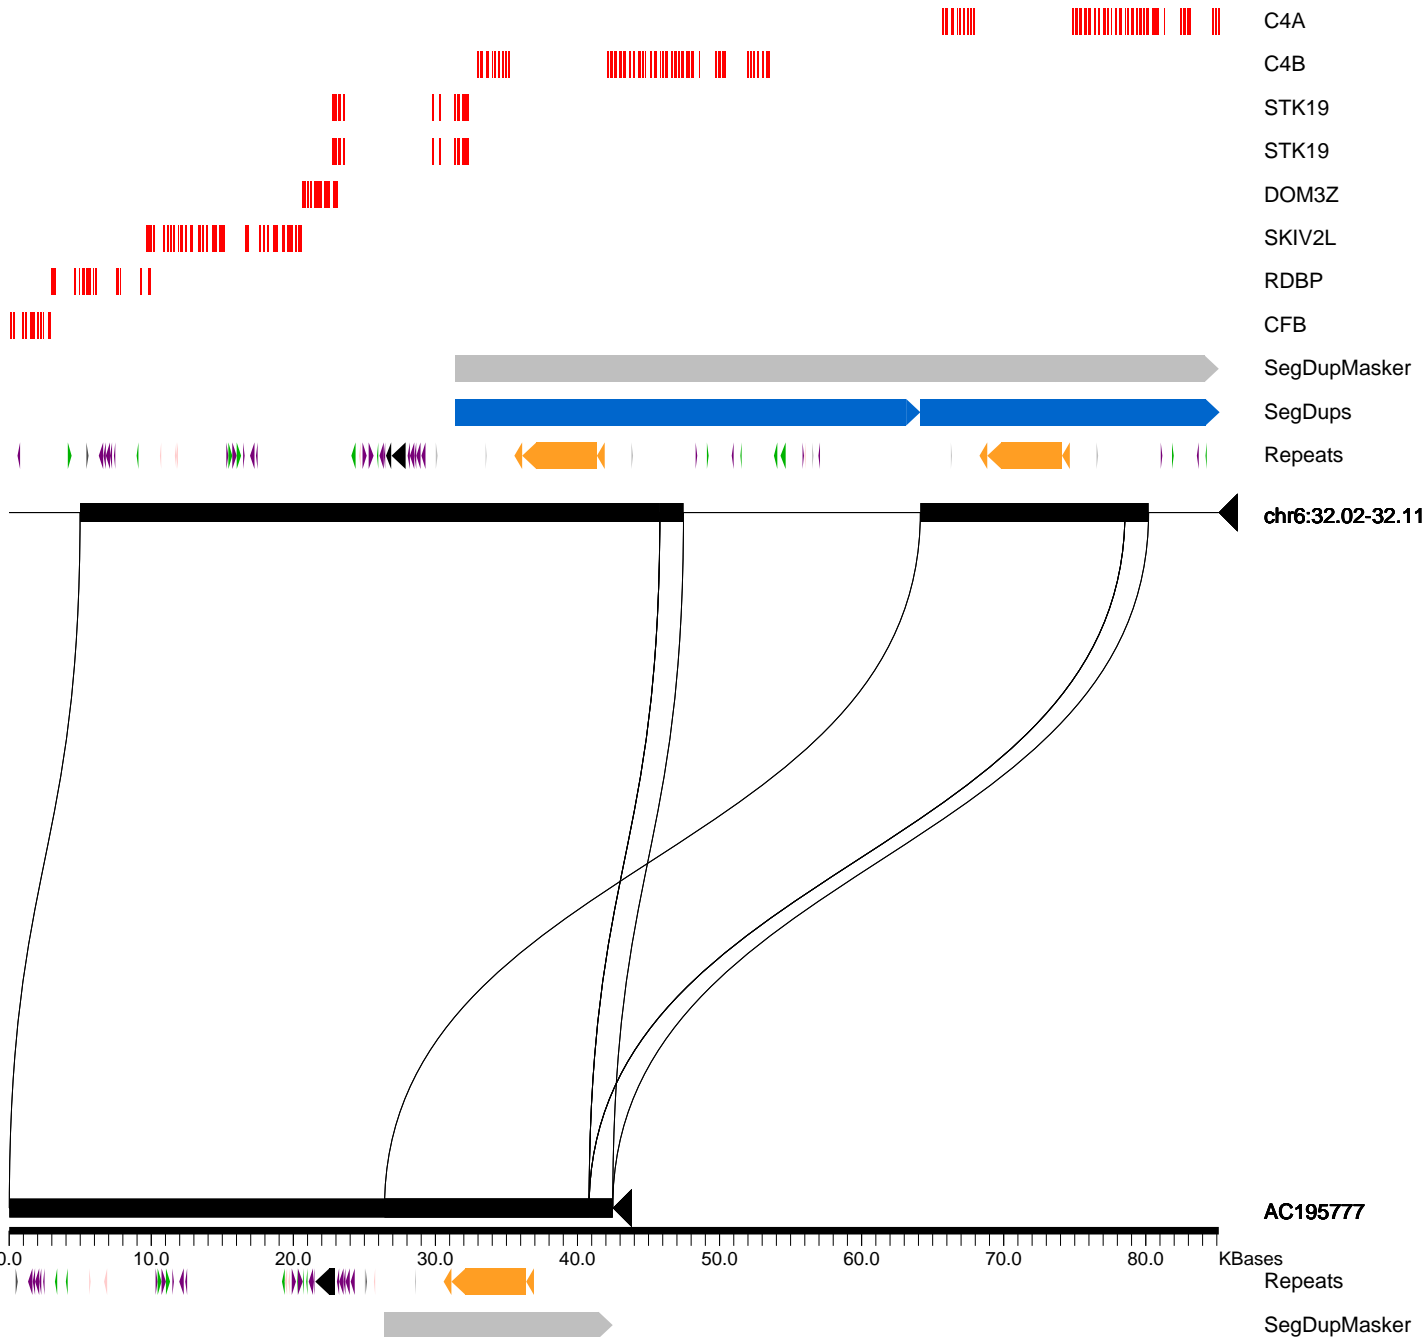

Clone: WIBR2-2078I02 Accession: AC196524

ESP Prediction: S Validation: U Mechanism:

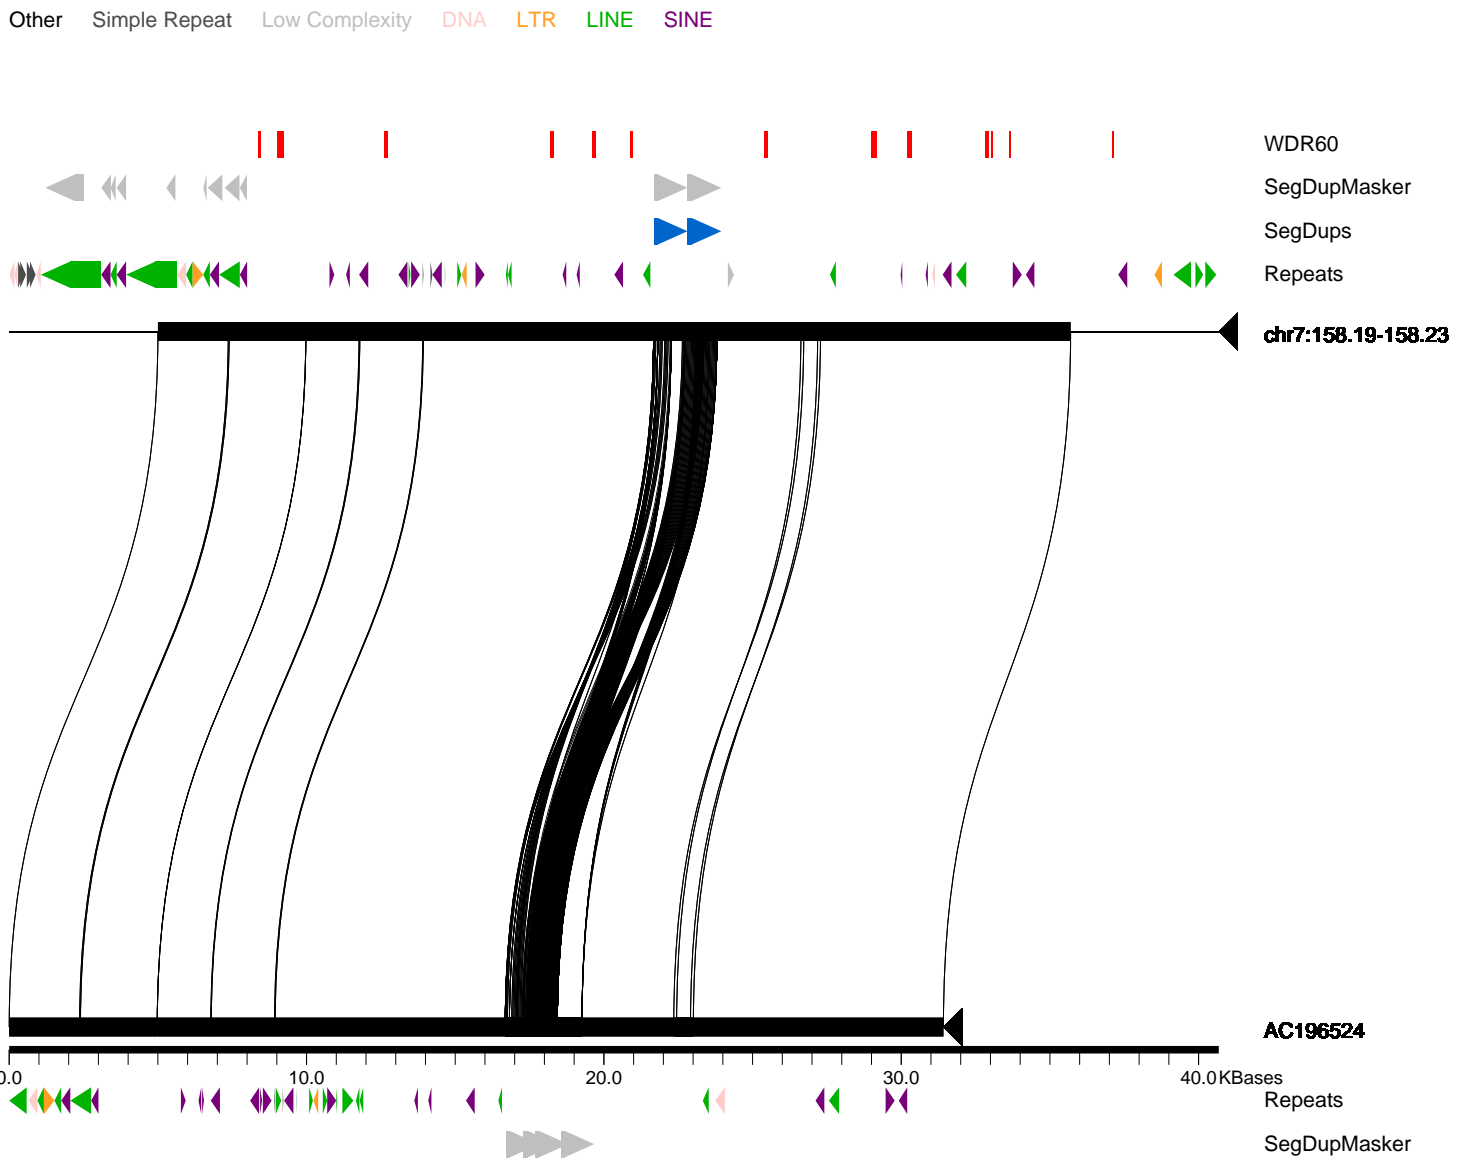

Clone: WIBR2-2082L21 Accession: AC153477

ESP Prediction: B Validation: U Mechanism: Not finished

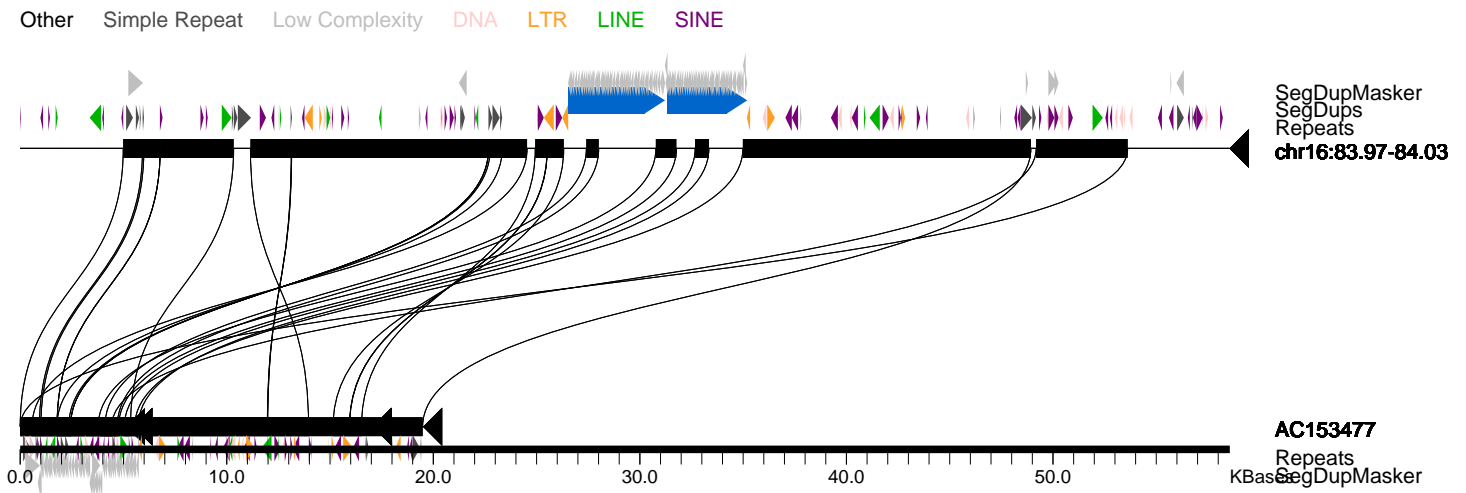



Clone: WIBR2-2572L12 Accession: AC196707

ESP Prediction: S Validation: U Mechanism: Not finished

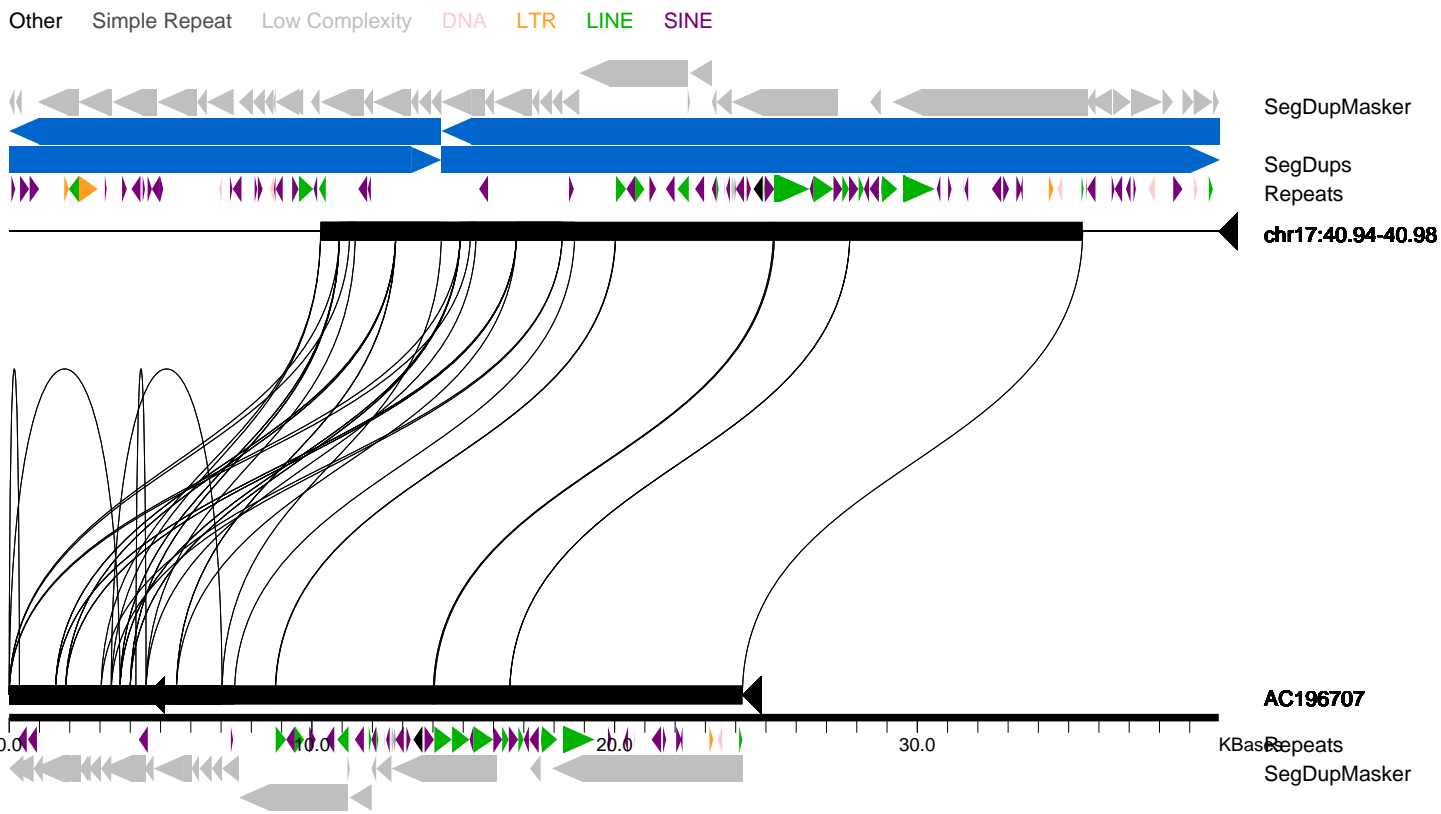

Clone: WIBR2-2860K23 Accession: AC195766

ESP Prediction: S Validation: U Mechanism: Not finished

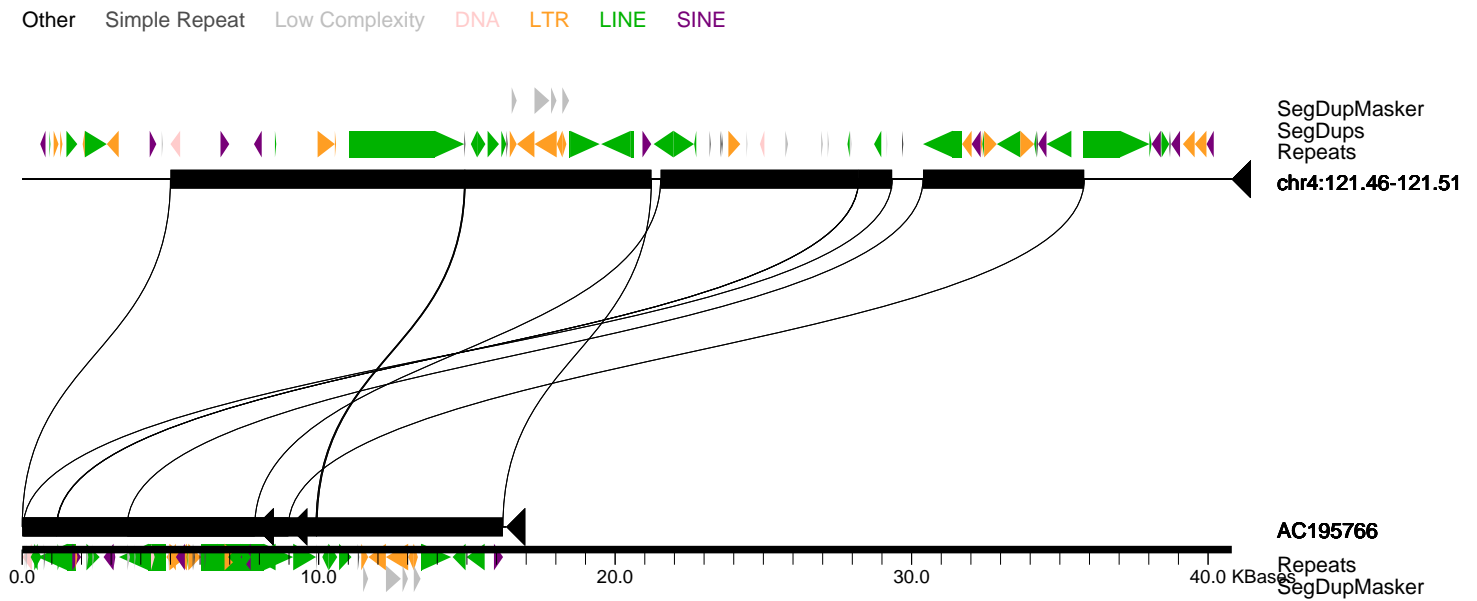

Clone: WIBR2-2801P14 Accession: AC196538

ESP Prediction: S Validation: U Mechanism: Not finished

Other Simple Repeat Low Complexity DNA LTR LINE SINE

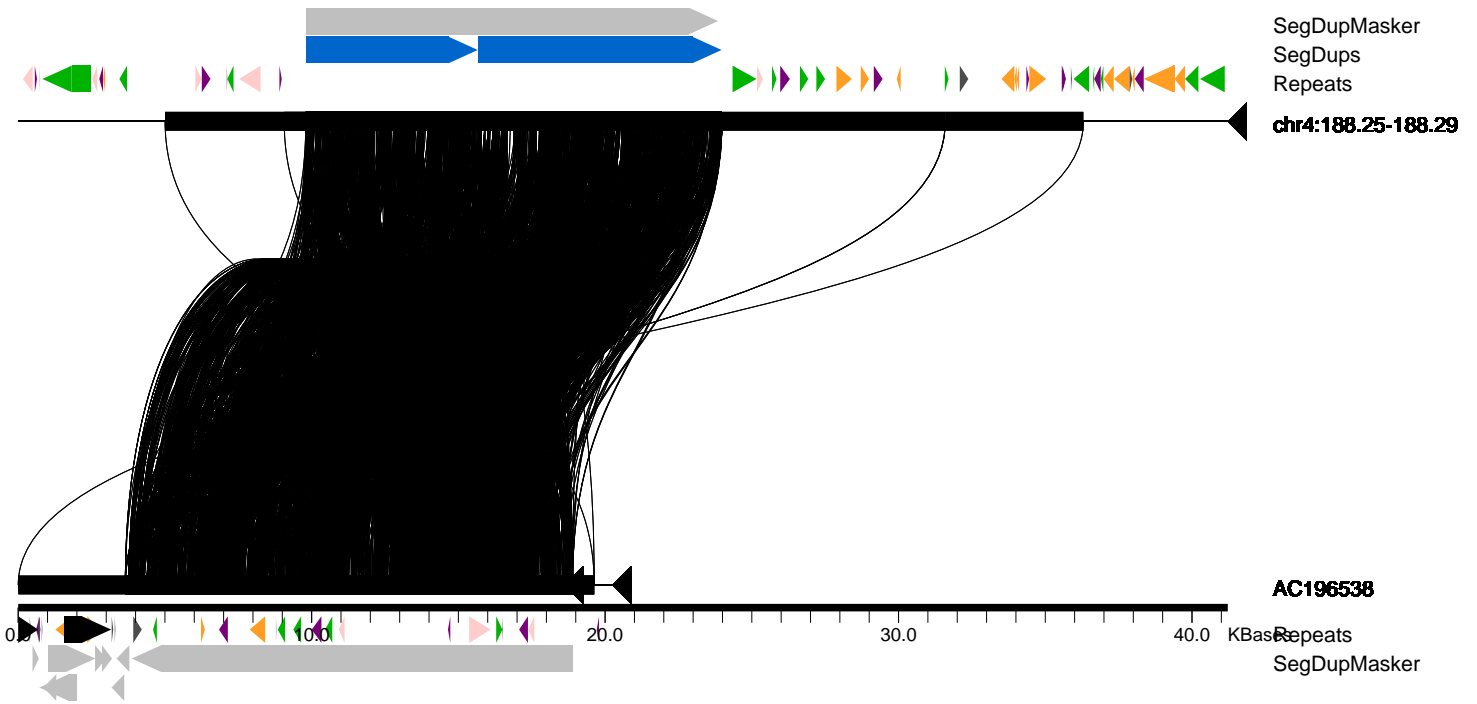

Clone: WIBR2-2793D22 Accession: AC196536

ESP Prediction: S Validation: U Mechanism: Not finished

Other Simple Repeat Low Complexity DNA LTR LINE SINE

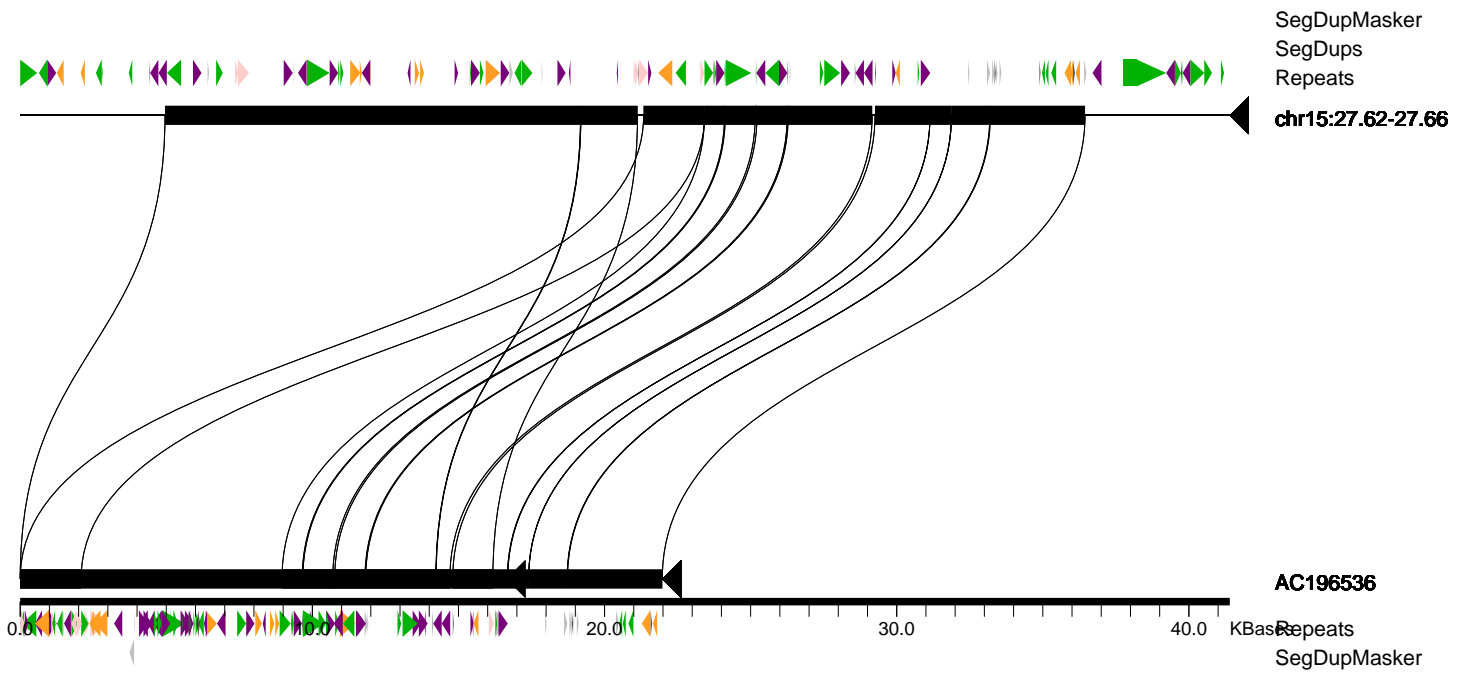

Clone: WIBR2-3301C12 Accession: AC193168

ESP Prediction: INV Validation: U Mechanism: Not finished

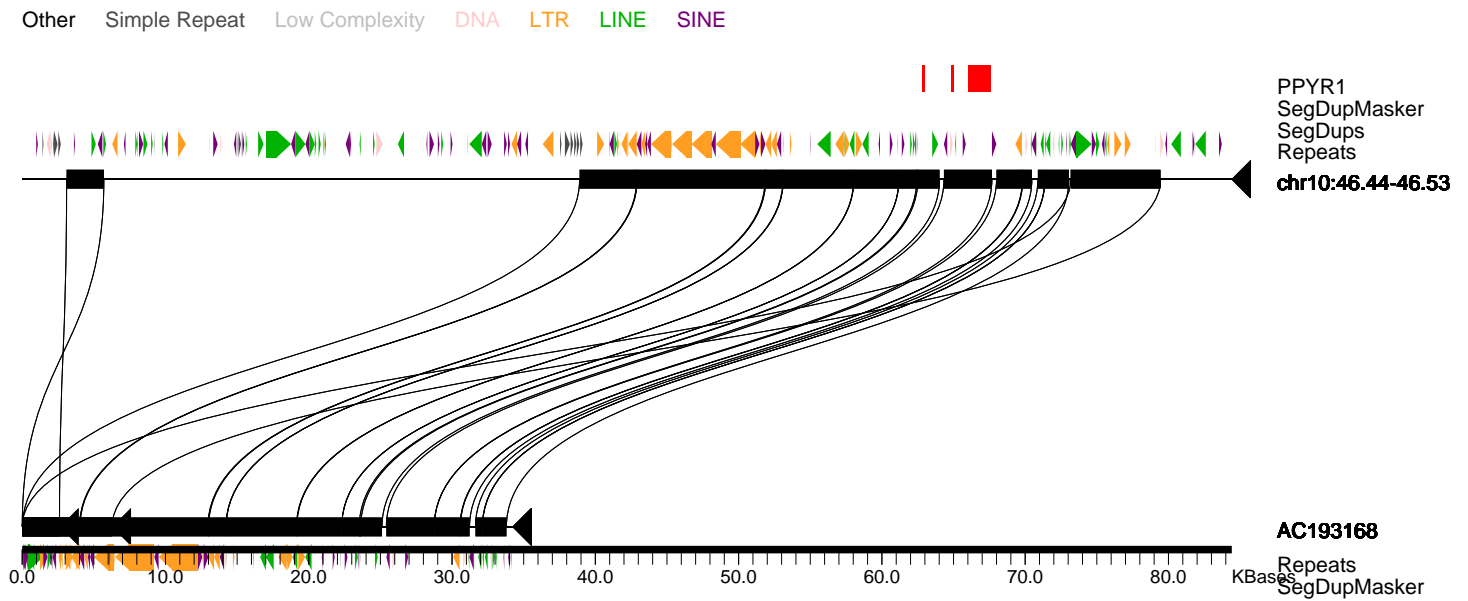

Supplement: NIHMS49728-supplement-Figure_S10.pdf [file NIHMS49728-supplement-Figure_S10.pdf]
