# Supplementary material
Source: PubMed Central journal article supplement (PMC2424287)

**Figure S1: Fosmid Genome Coverage.** The fosmid library coverage is shown for each library as the fraction of nucleotides that are spanned by end-sequence pairs that map to a best location in the genome. The fraction of the genome with no best-placement spanning clones ( $n=0$ ), 1 or more ( $\geq 1$ ), two or more ( $\geq 2$ ), and four or more ( $\geq 4$ ) is indicated. Autosomes and the X chromosome are considered separately. ABC8 represented the sole male sample.

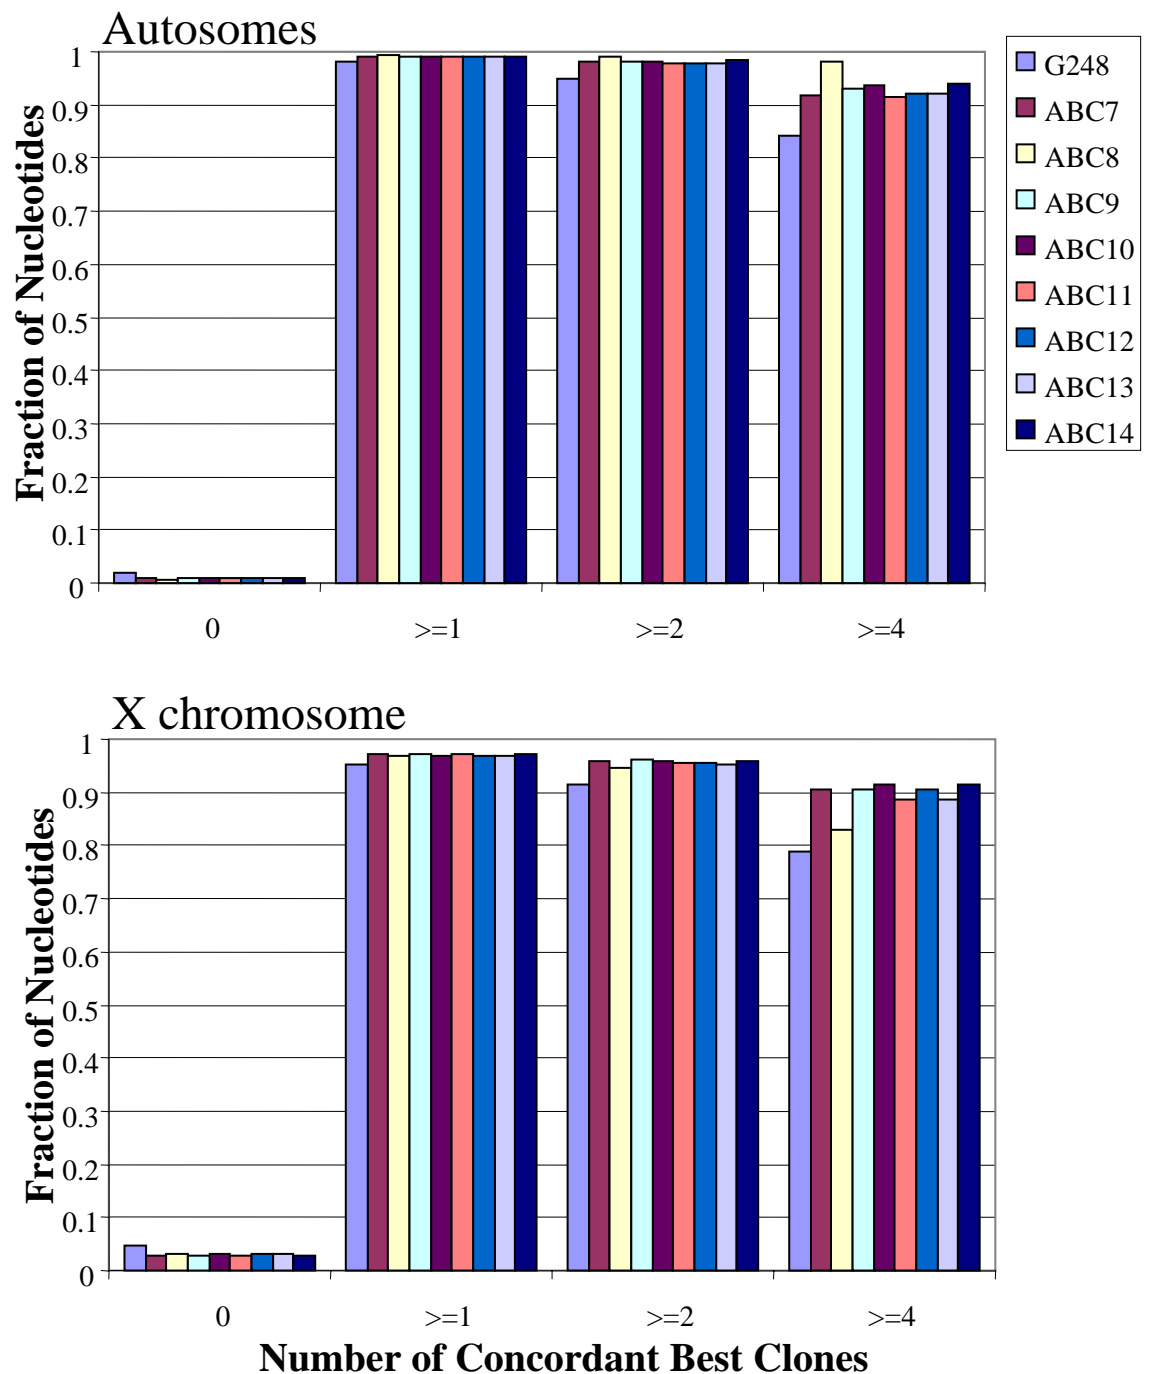

Supplement: NIHMS49728-supplement-Figure_S1.pdf [file NIHMS49728-supplement-Figure_S1.pdf]
