# Supplementary material
Source: PubMed Central journal article supplement (PMC2424287)
Supplement: NIHMS49728-supplement-Figure_S2.pdf [file NIHMS49728-supplement-Figure_S2.pdf]

**Figure S2: Fosmid Clone Tiling Paths.** The browser snapshots (<http://hgsv.washington.edu>) show the clone ID and mapping location of concordant (black) and discordant (red) fosmid end-sequences mapped against the human genome (hg17) for each library. a) Clone tiling path across the leptin (*LEP*) locus is shown for two individual libraries, G248 and ABC7; all clones are concordant by length and orientation; b) A putative heterozygous deletion is shown for an individual library (ABC7) where both concordant and discordant clones are identified; note discordant clones from third library (ABC9) predict an insertion allele over the *CYP2D6* locus; c) The *GSTM1* shows an example of locus complexity. Analysis of the ABC9 library predicts a homozygous deletion (absence of concordant clones) and another genomic library (ABC10) predicts the presence of two non-overlapping insertions in the heterozygous state. Any region of interest in the human genome can be accessed using a UCSC browser interface (<http://hgsv.washington.edu>) and the corresponding fosmid clones, end-sequences, and alignments retrieved for further characterization.

# Fig. S2 a) Clone Tiling path across LEP locus (1 clone/5 kb)

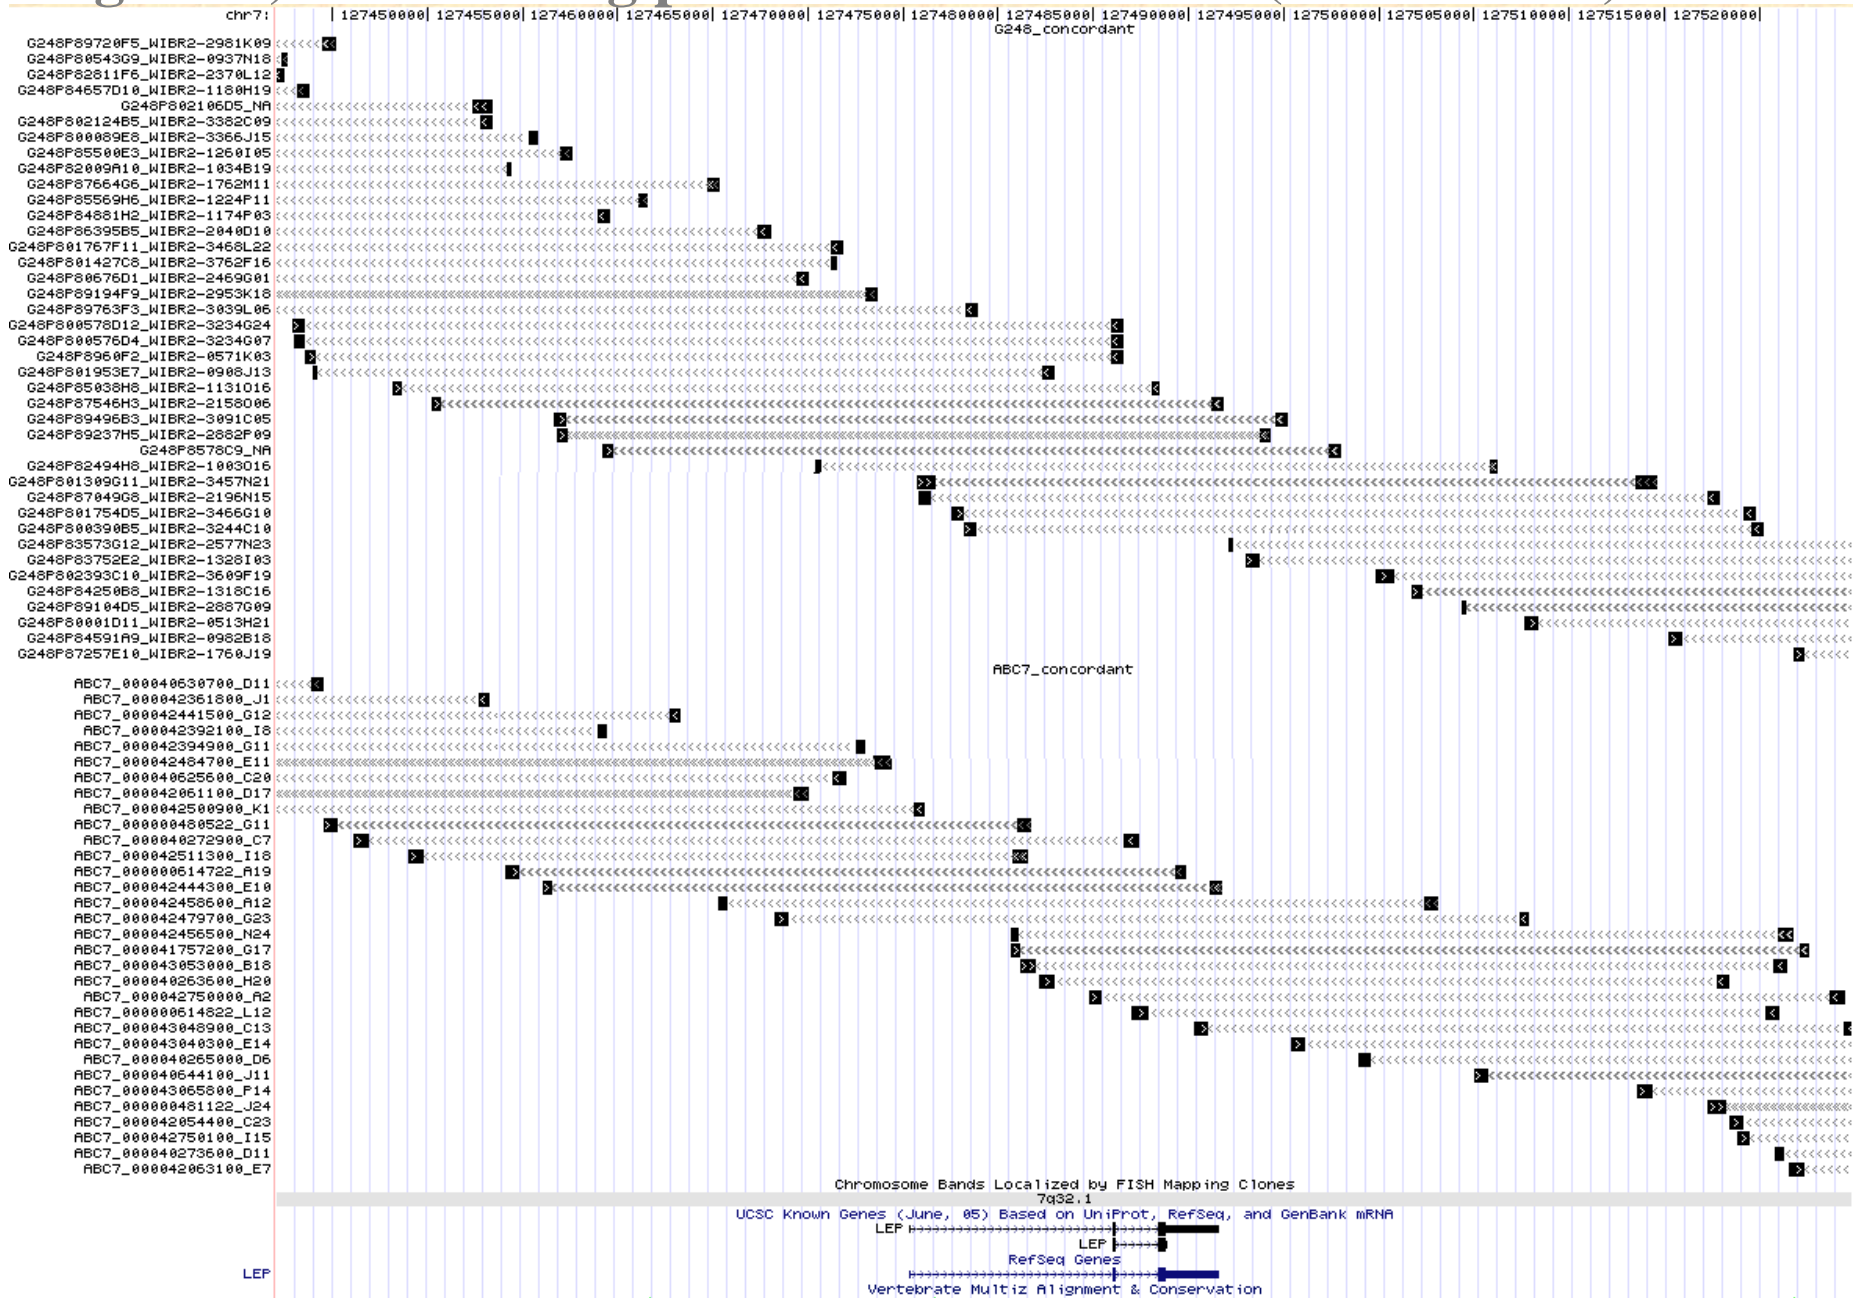

# Fig. S2 b) CYP2D6 Deletion

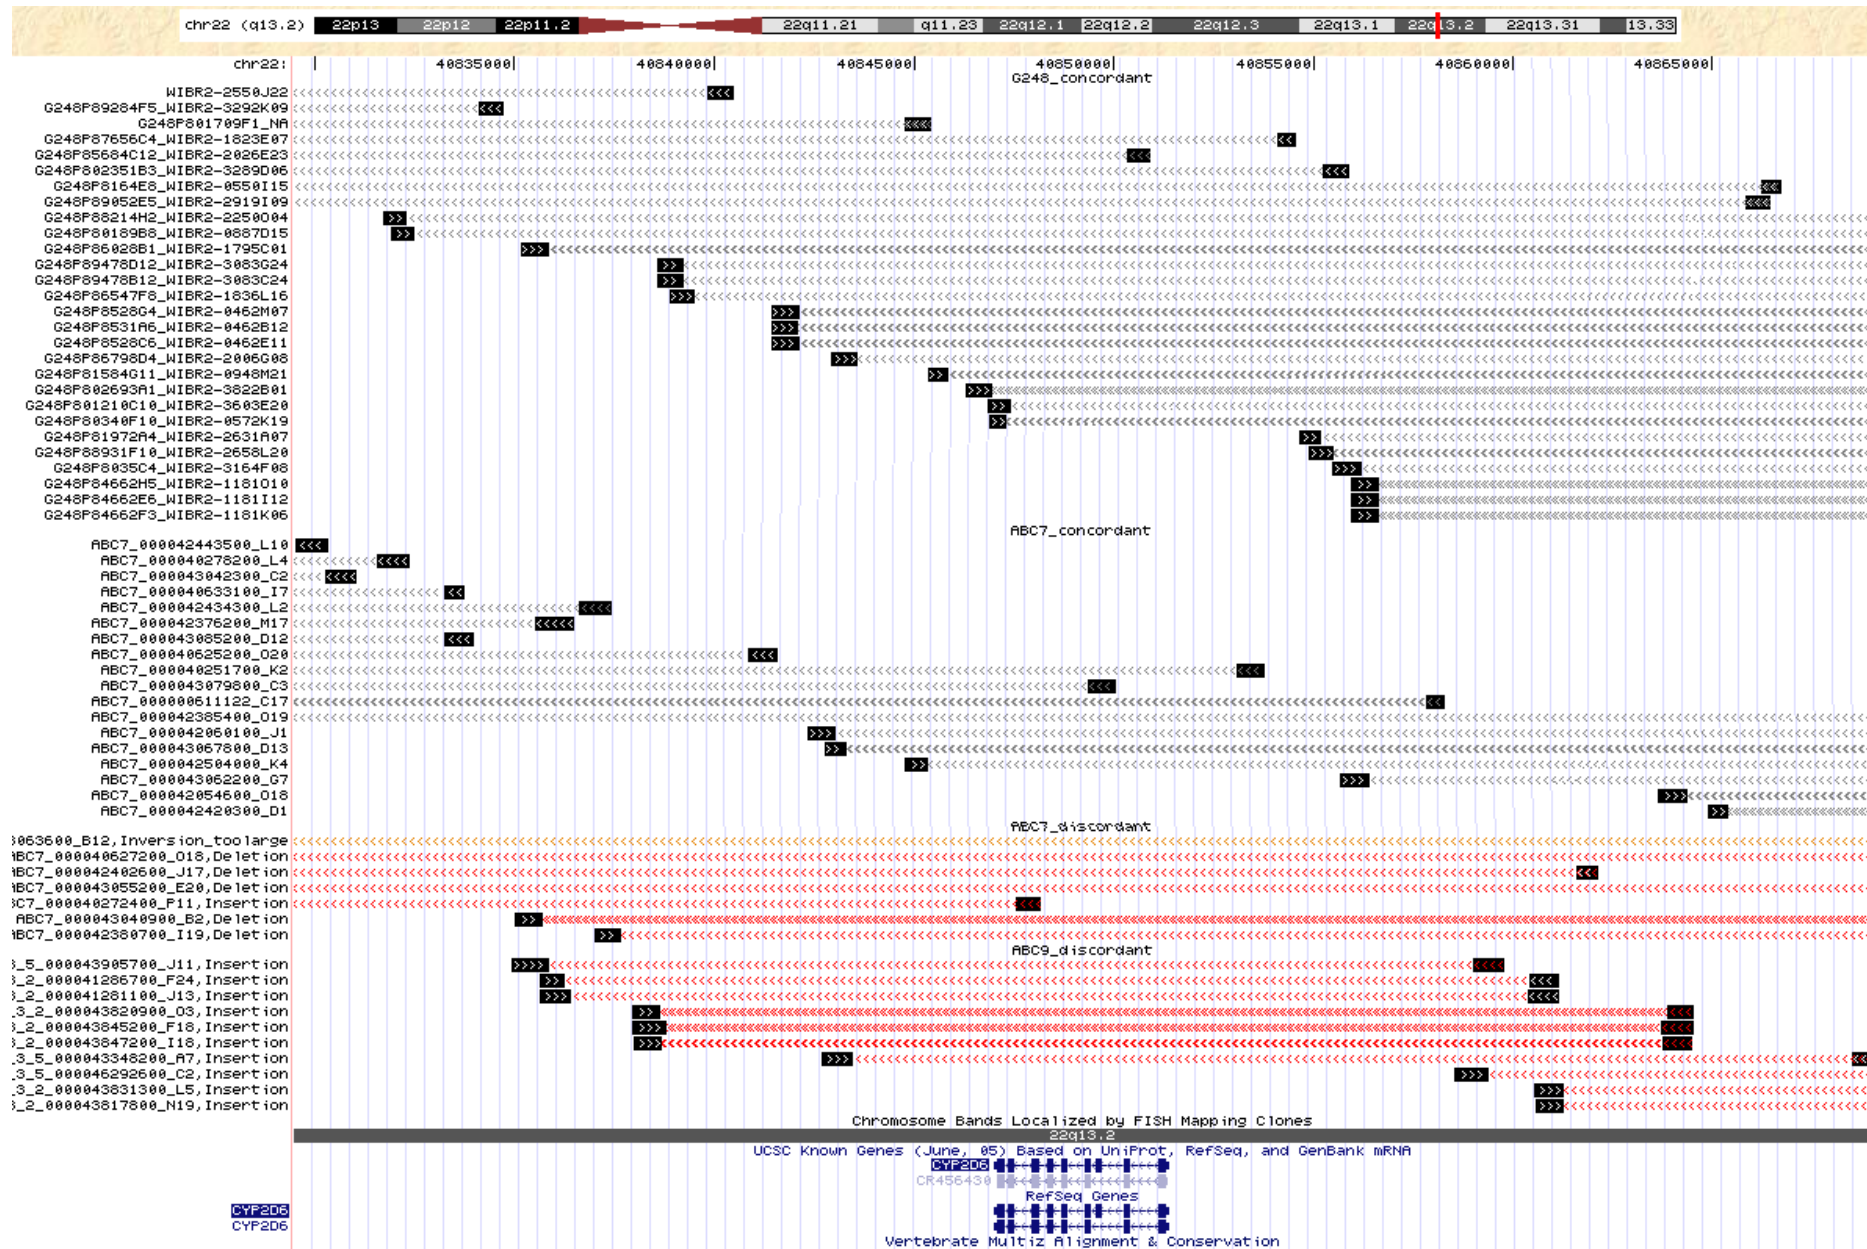

# Fig. S2 c) GSTM1 Locus Complexity

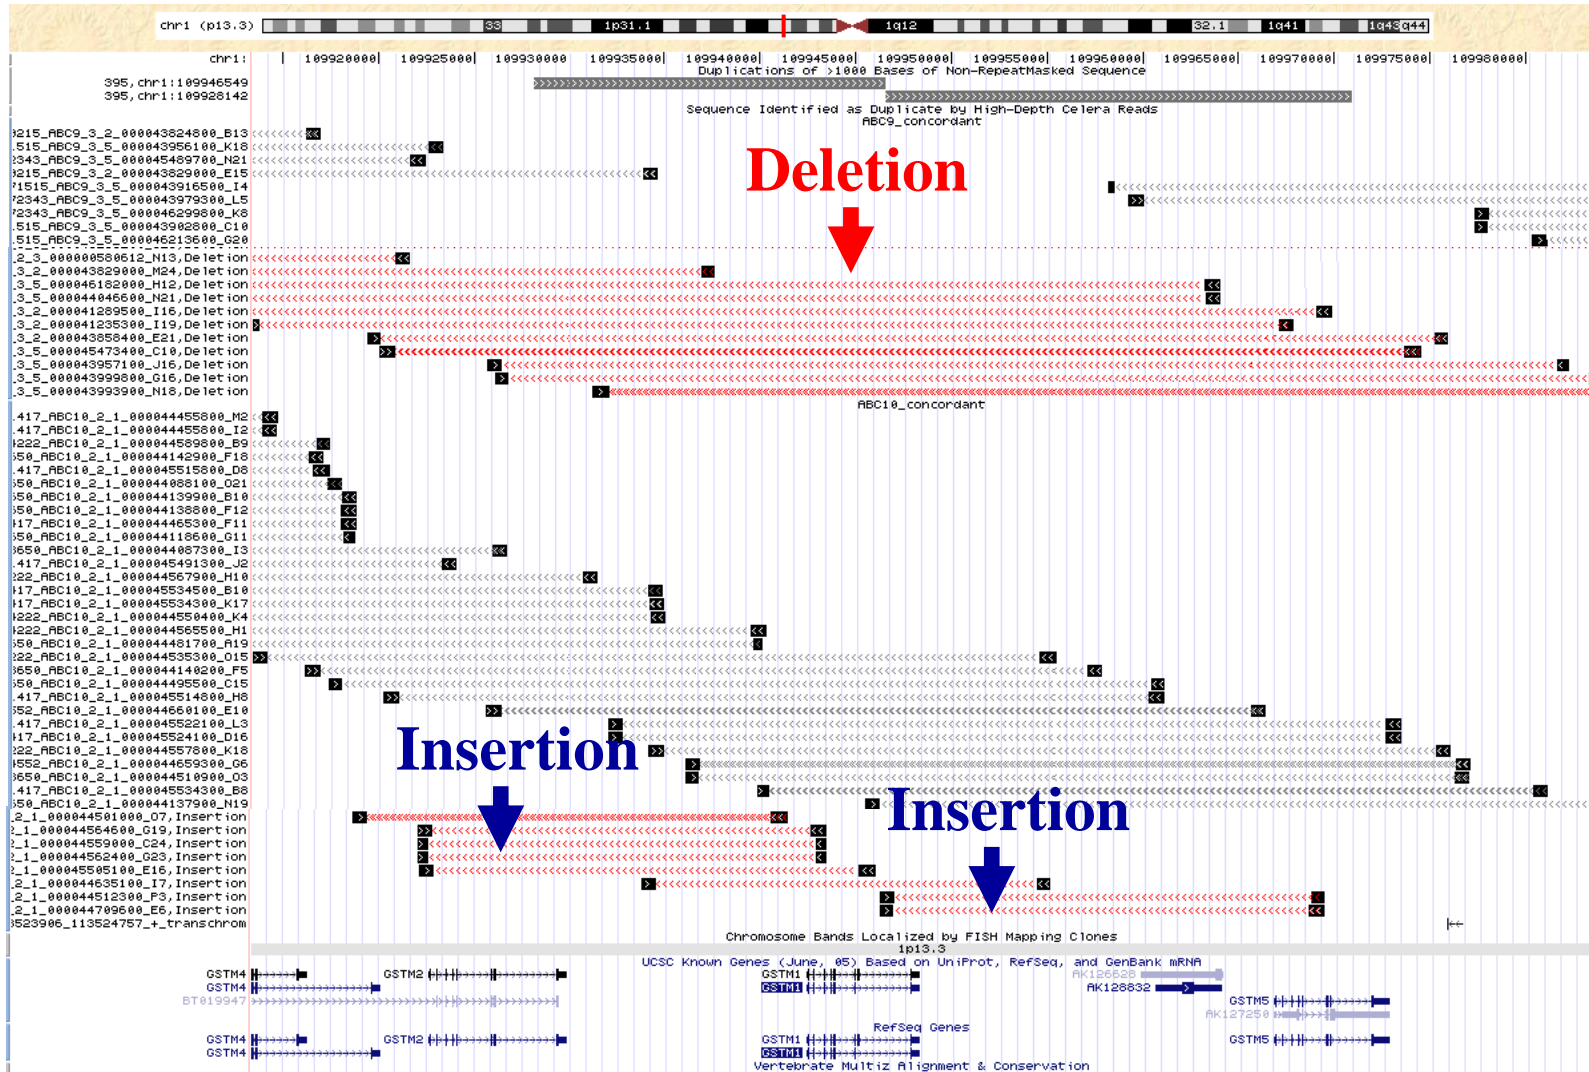

Japanese  
Sample  
NA18956

Yoruba  
Sample  
NA19240
