# Supplementary material
Source: PubMed Central journal article supplement (PMC2424287)
Supplement: NIHMS49728-supplement-Figure_S4.pdf [file NIHMS49728-supplement-Figure_S4.pdf]

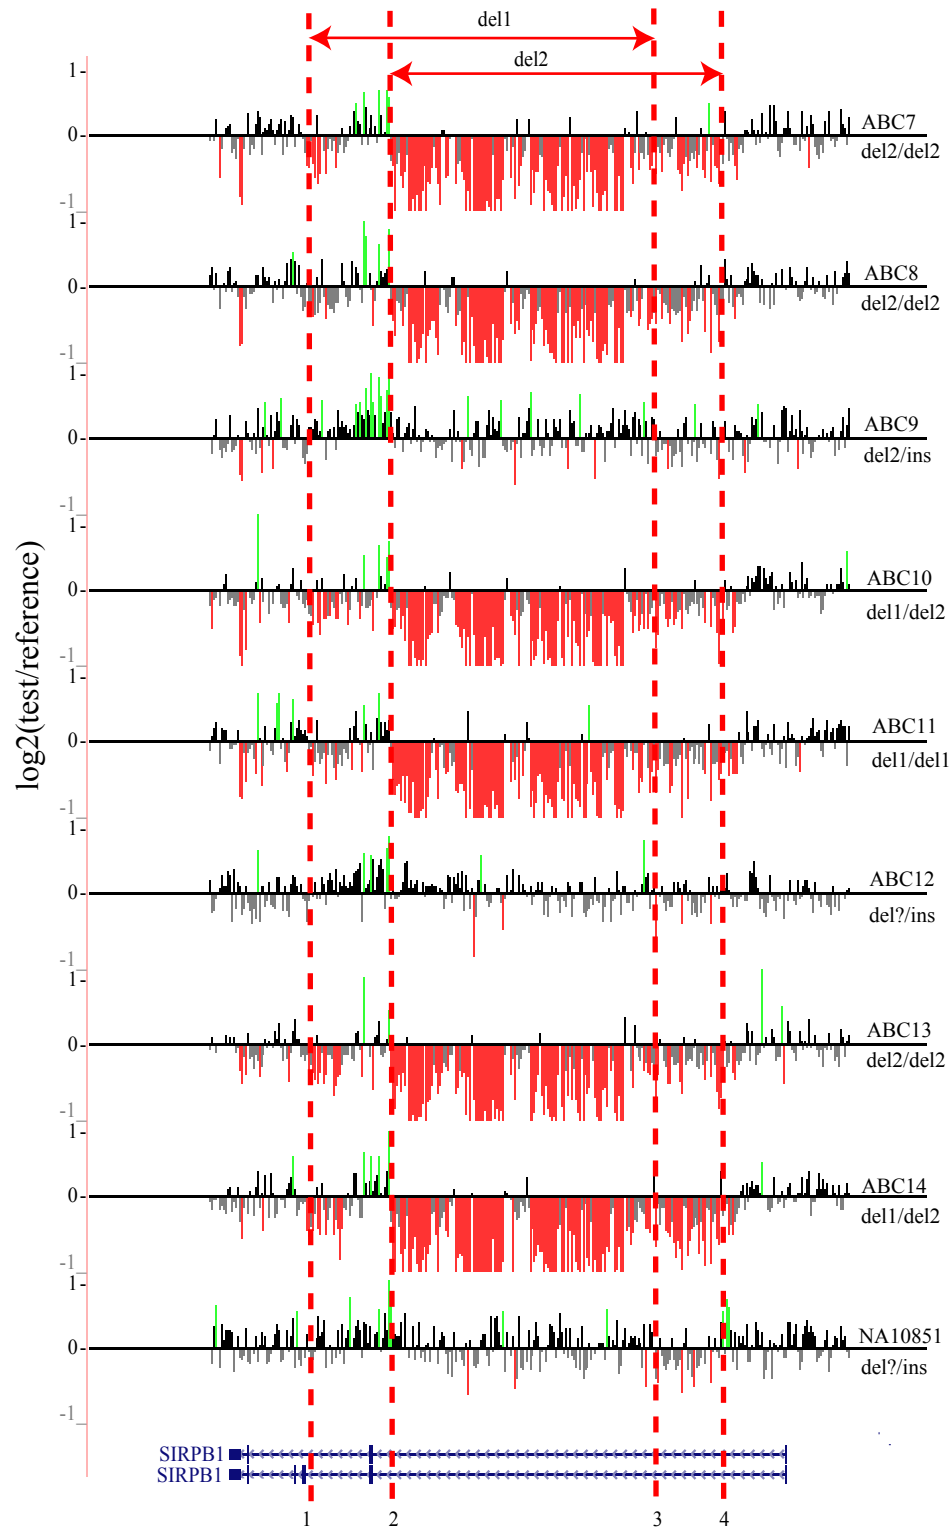

**Figure S4. Array Comparative Genomic Hybridization Validation.** Array comparative genomic hybridization results of the same region shown in Figure 4. While a common deletion can be confirmed, breakpoint heterogeneity can not be discerned nor can genotype status be accurately predicted (see ABC9) unless the sequence structure of the reference genome (G248) is known.
