# Supplementary material
Source: PubMed Central journal article supplement (PMC2424287)

**Figure S6. Inversion Identification and Validation.** A schematic of clones used to identify 5 large inversions is shown (coloring as in Figure S3). Each of the depicted clones has an “inverted” orientation. Despite the presence of duplicated sequences (grey boxes), the clones have a single, best placement. For each locus, FISH validation is shown with the inverted allele indicated by the arrow. The 8q24 inversion was only observed in 3/20 nuclei and may be mosaic.

Figure S6

### 3q29

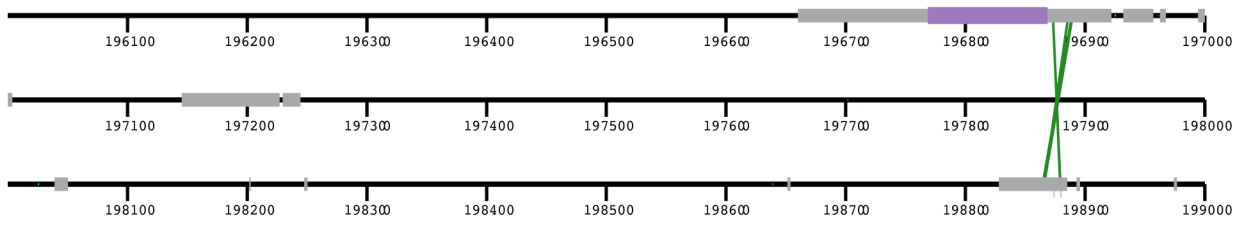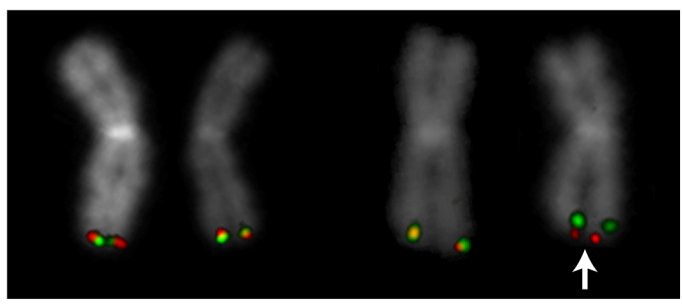

### 8p23

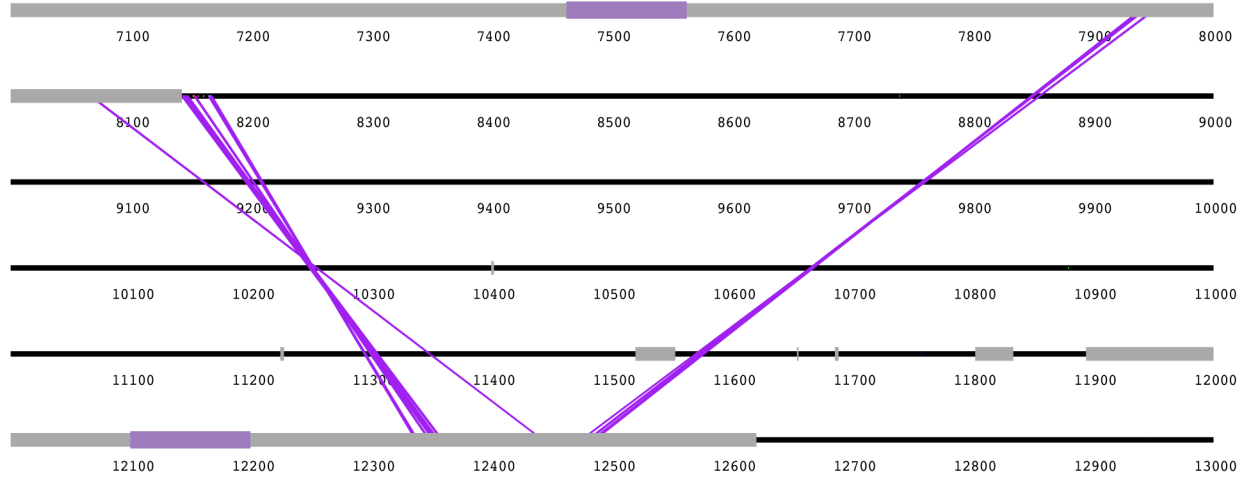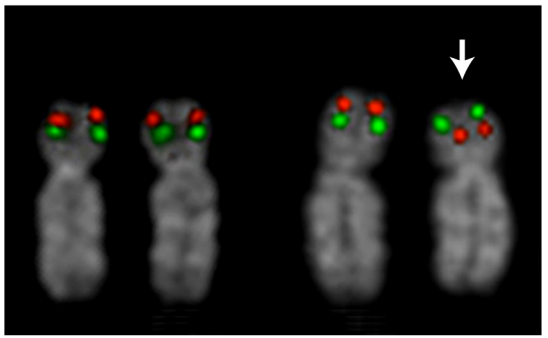

### 8q24

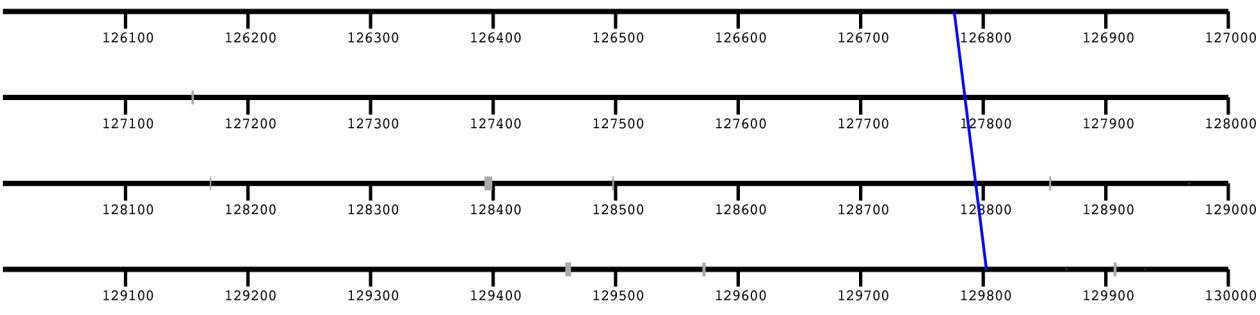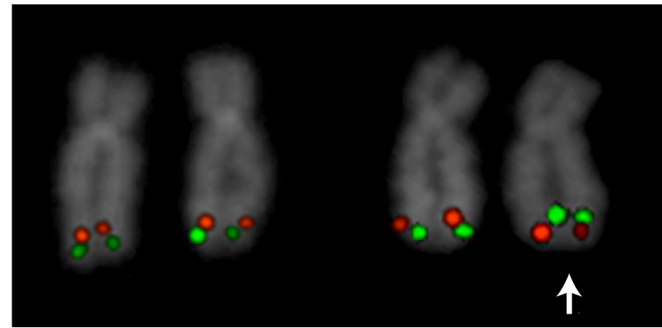

### 15q24

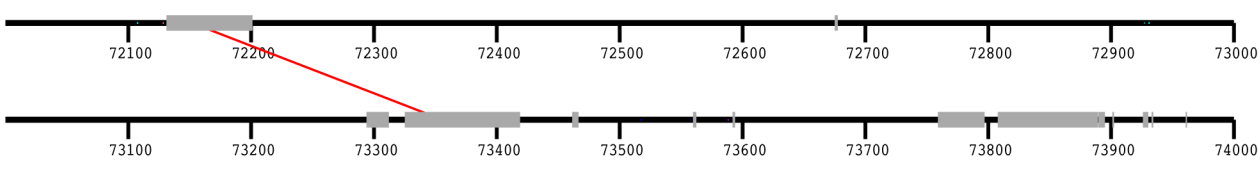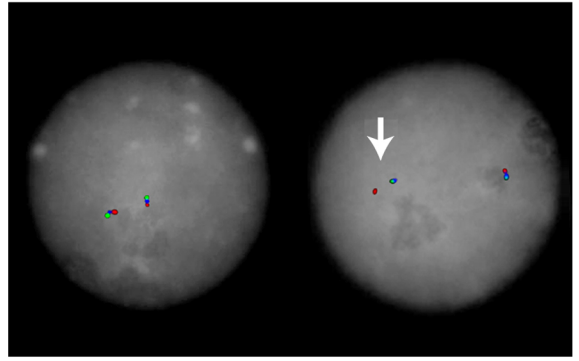

### 17q12

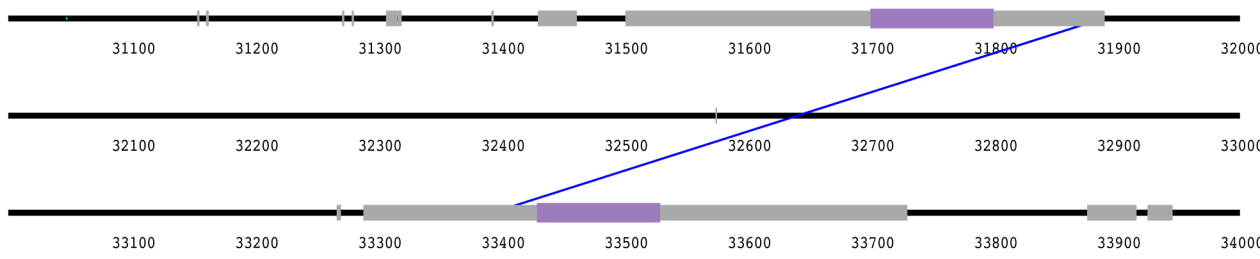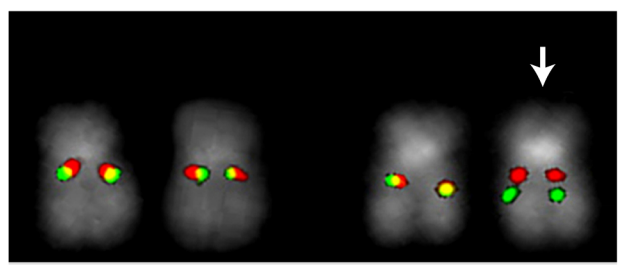

Supplement: NIHMS49728-supplement-Figure_S6.pdf [file NIHMS49728-supplement-Figure_S6.pdf]
