# Supplementary material
Source: PubMed Central journal article supplement (PMC2424287)
Supplement: NIHMS49728-supplement-Figure_S7.pdf [file NIHMS49728-supplement-Figure_S7.pdf]

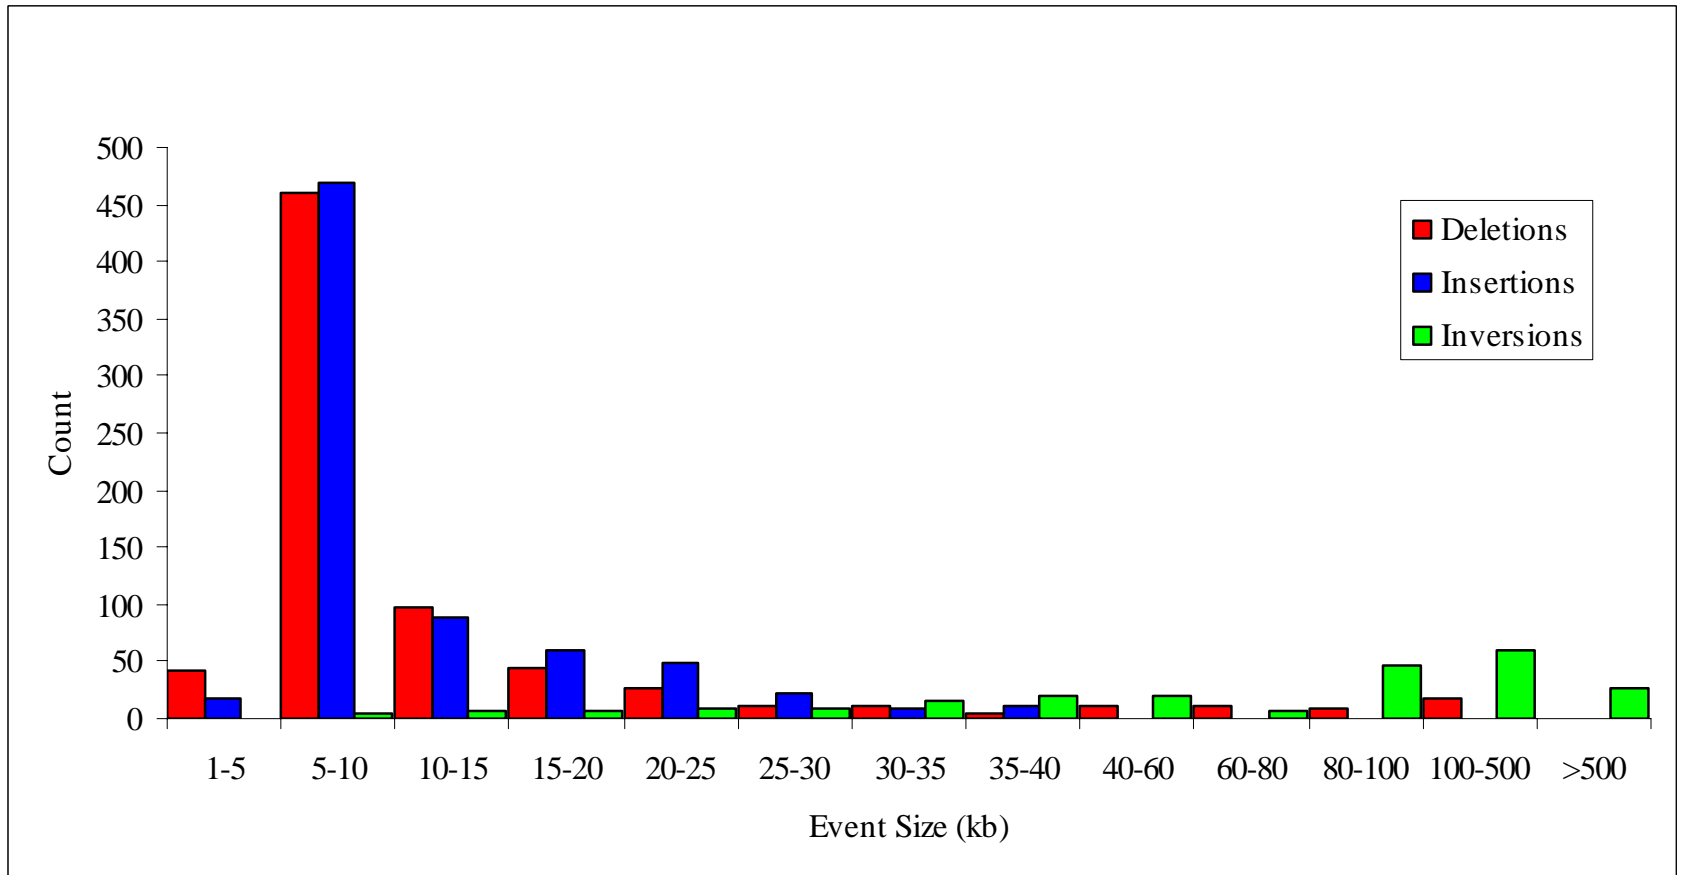

**Figure S7 Size of Validated Sites.** The size distribution was calculated for 1695 validated events based on the average size discordancy of supporting clones (for deletions or insertions) or the span of discordant clones (for inversions).
