# Supplementary material
Source: PubMed Central journal article supplement (PMC2424287)

Figure S3 c)  
Inversions

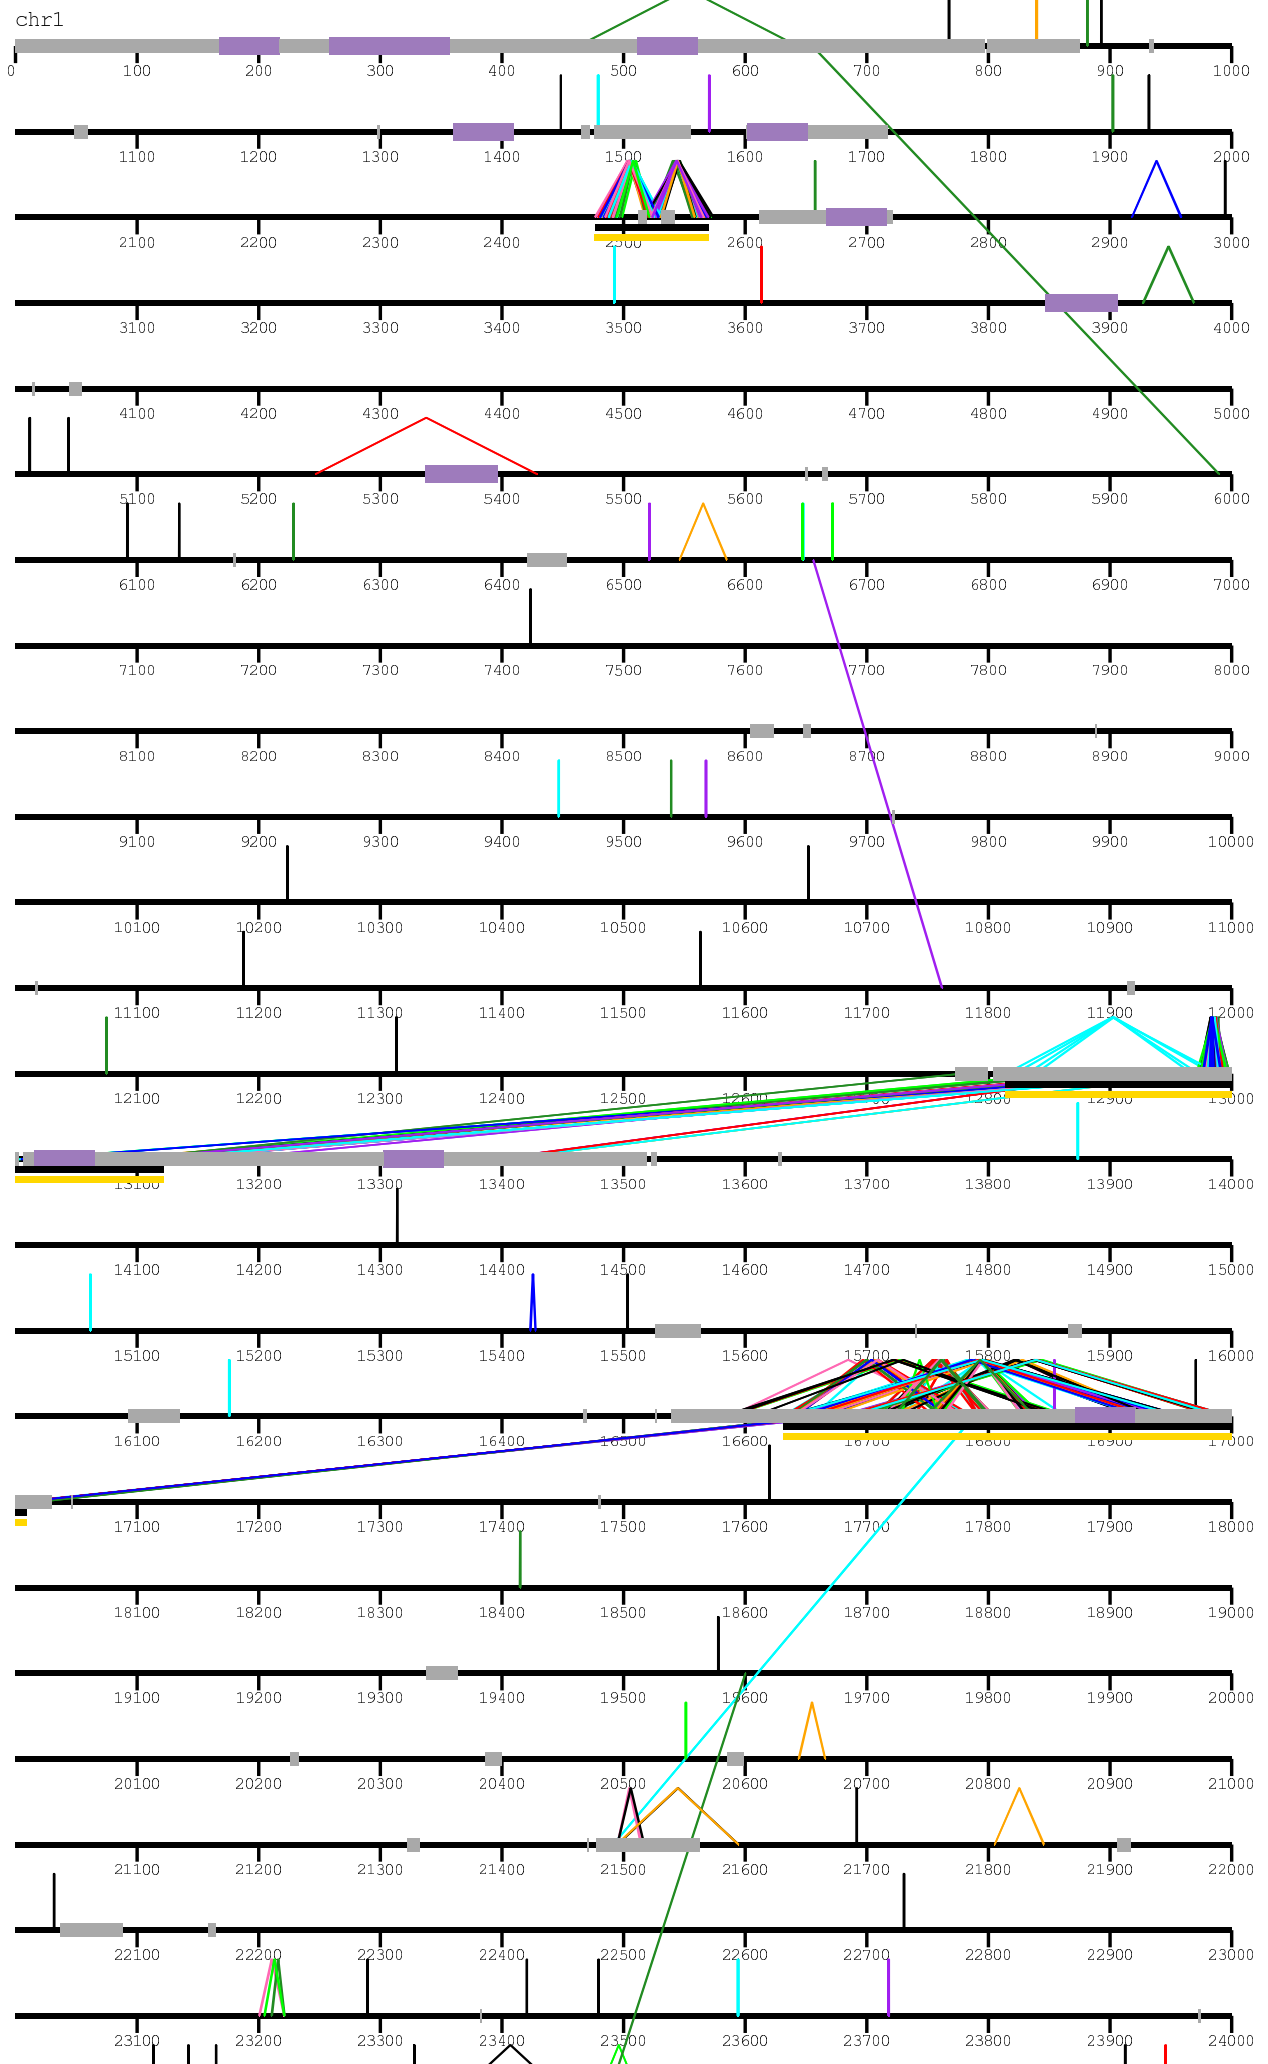

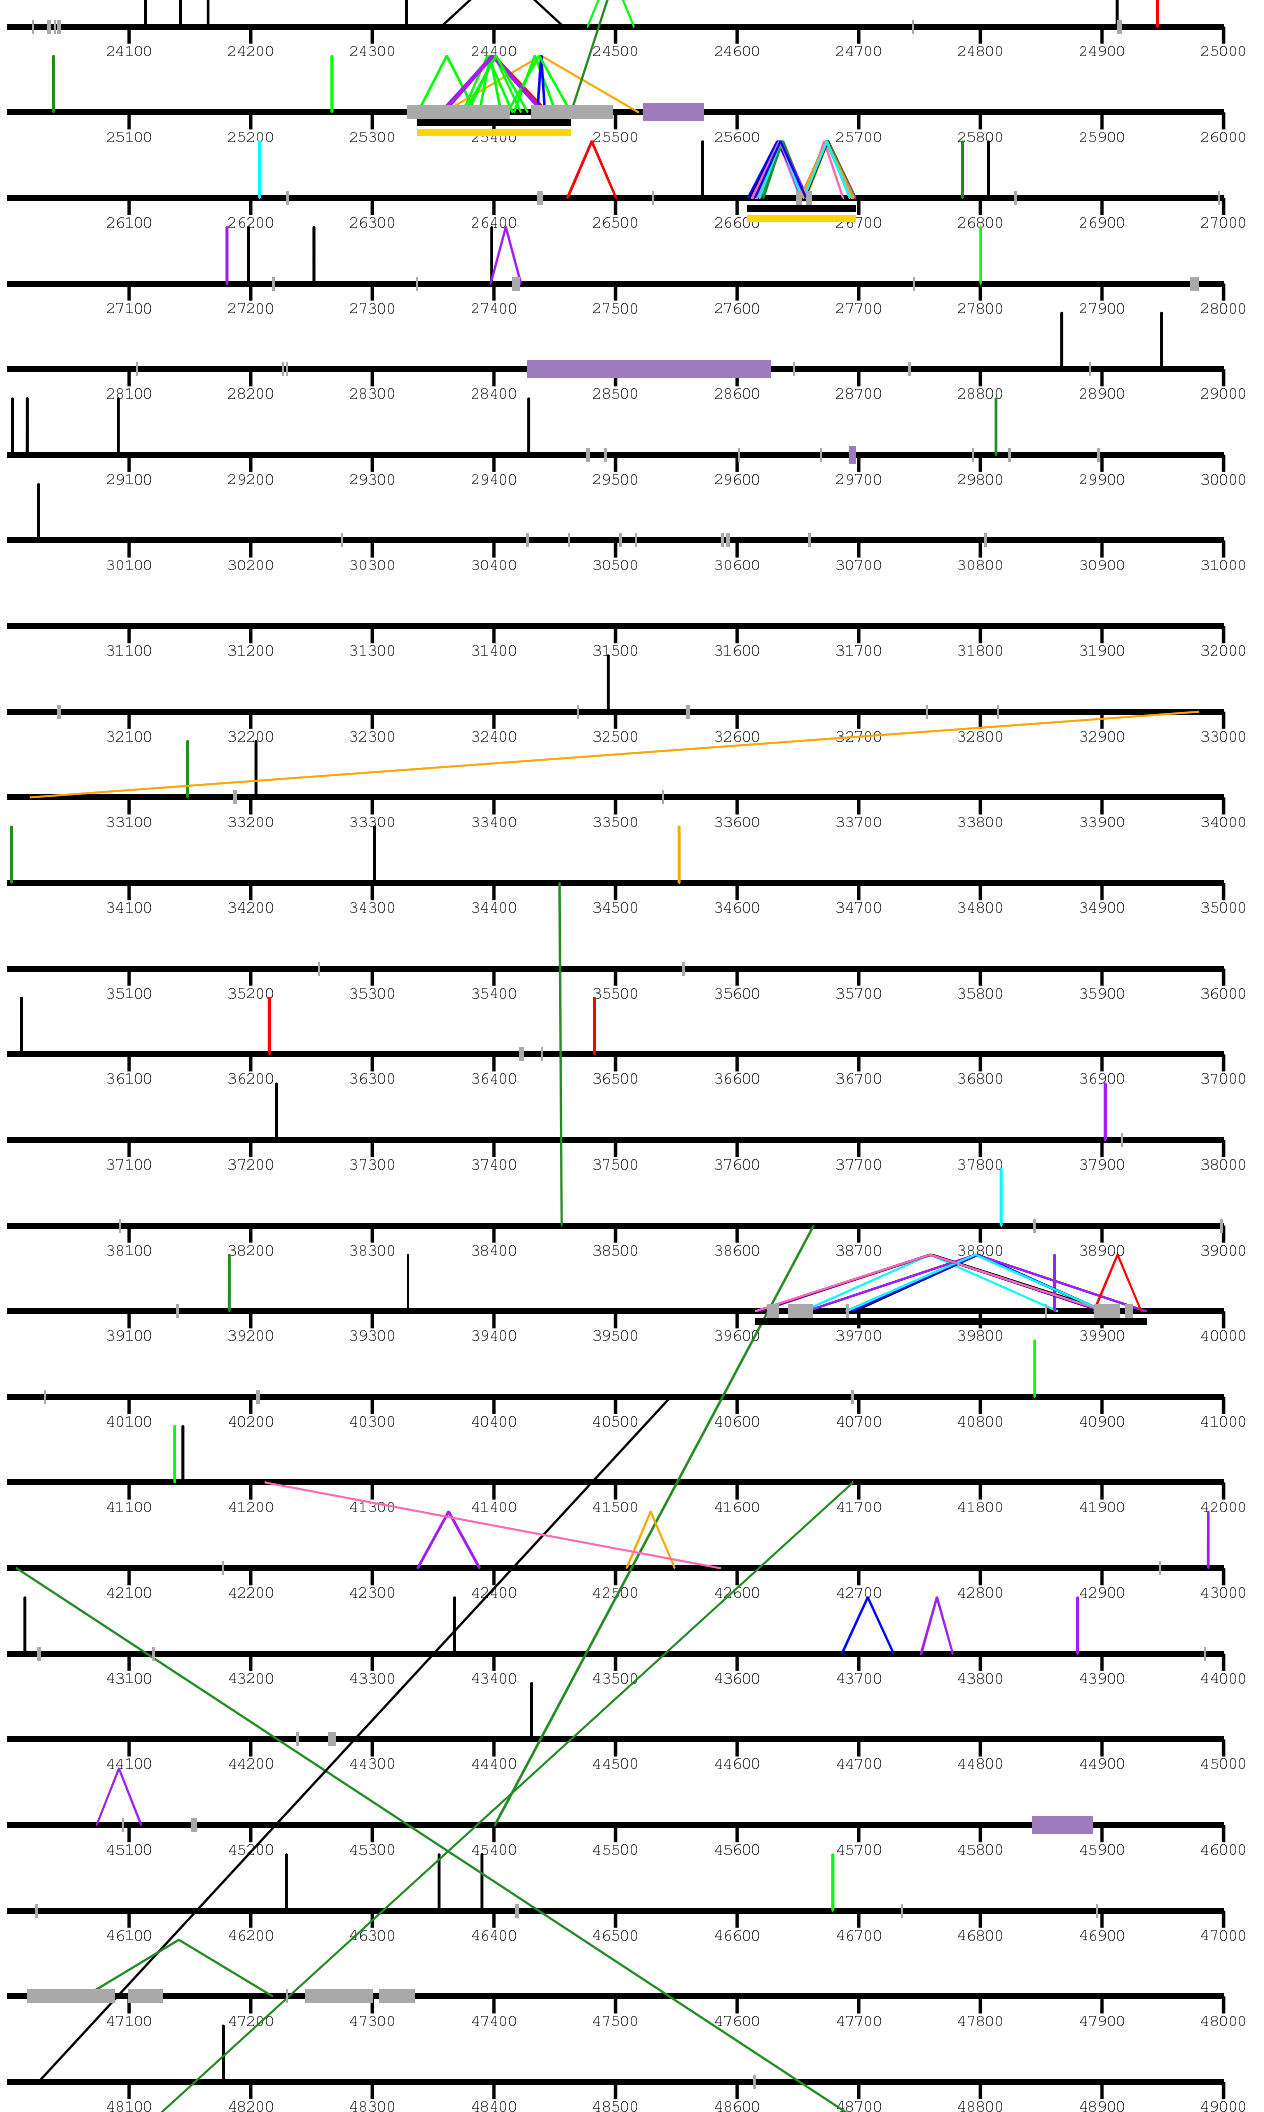

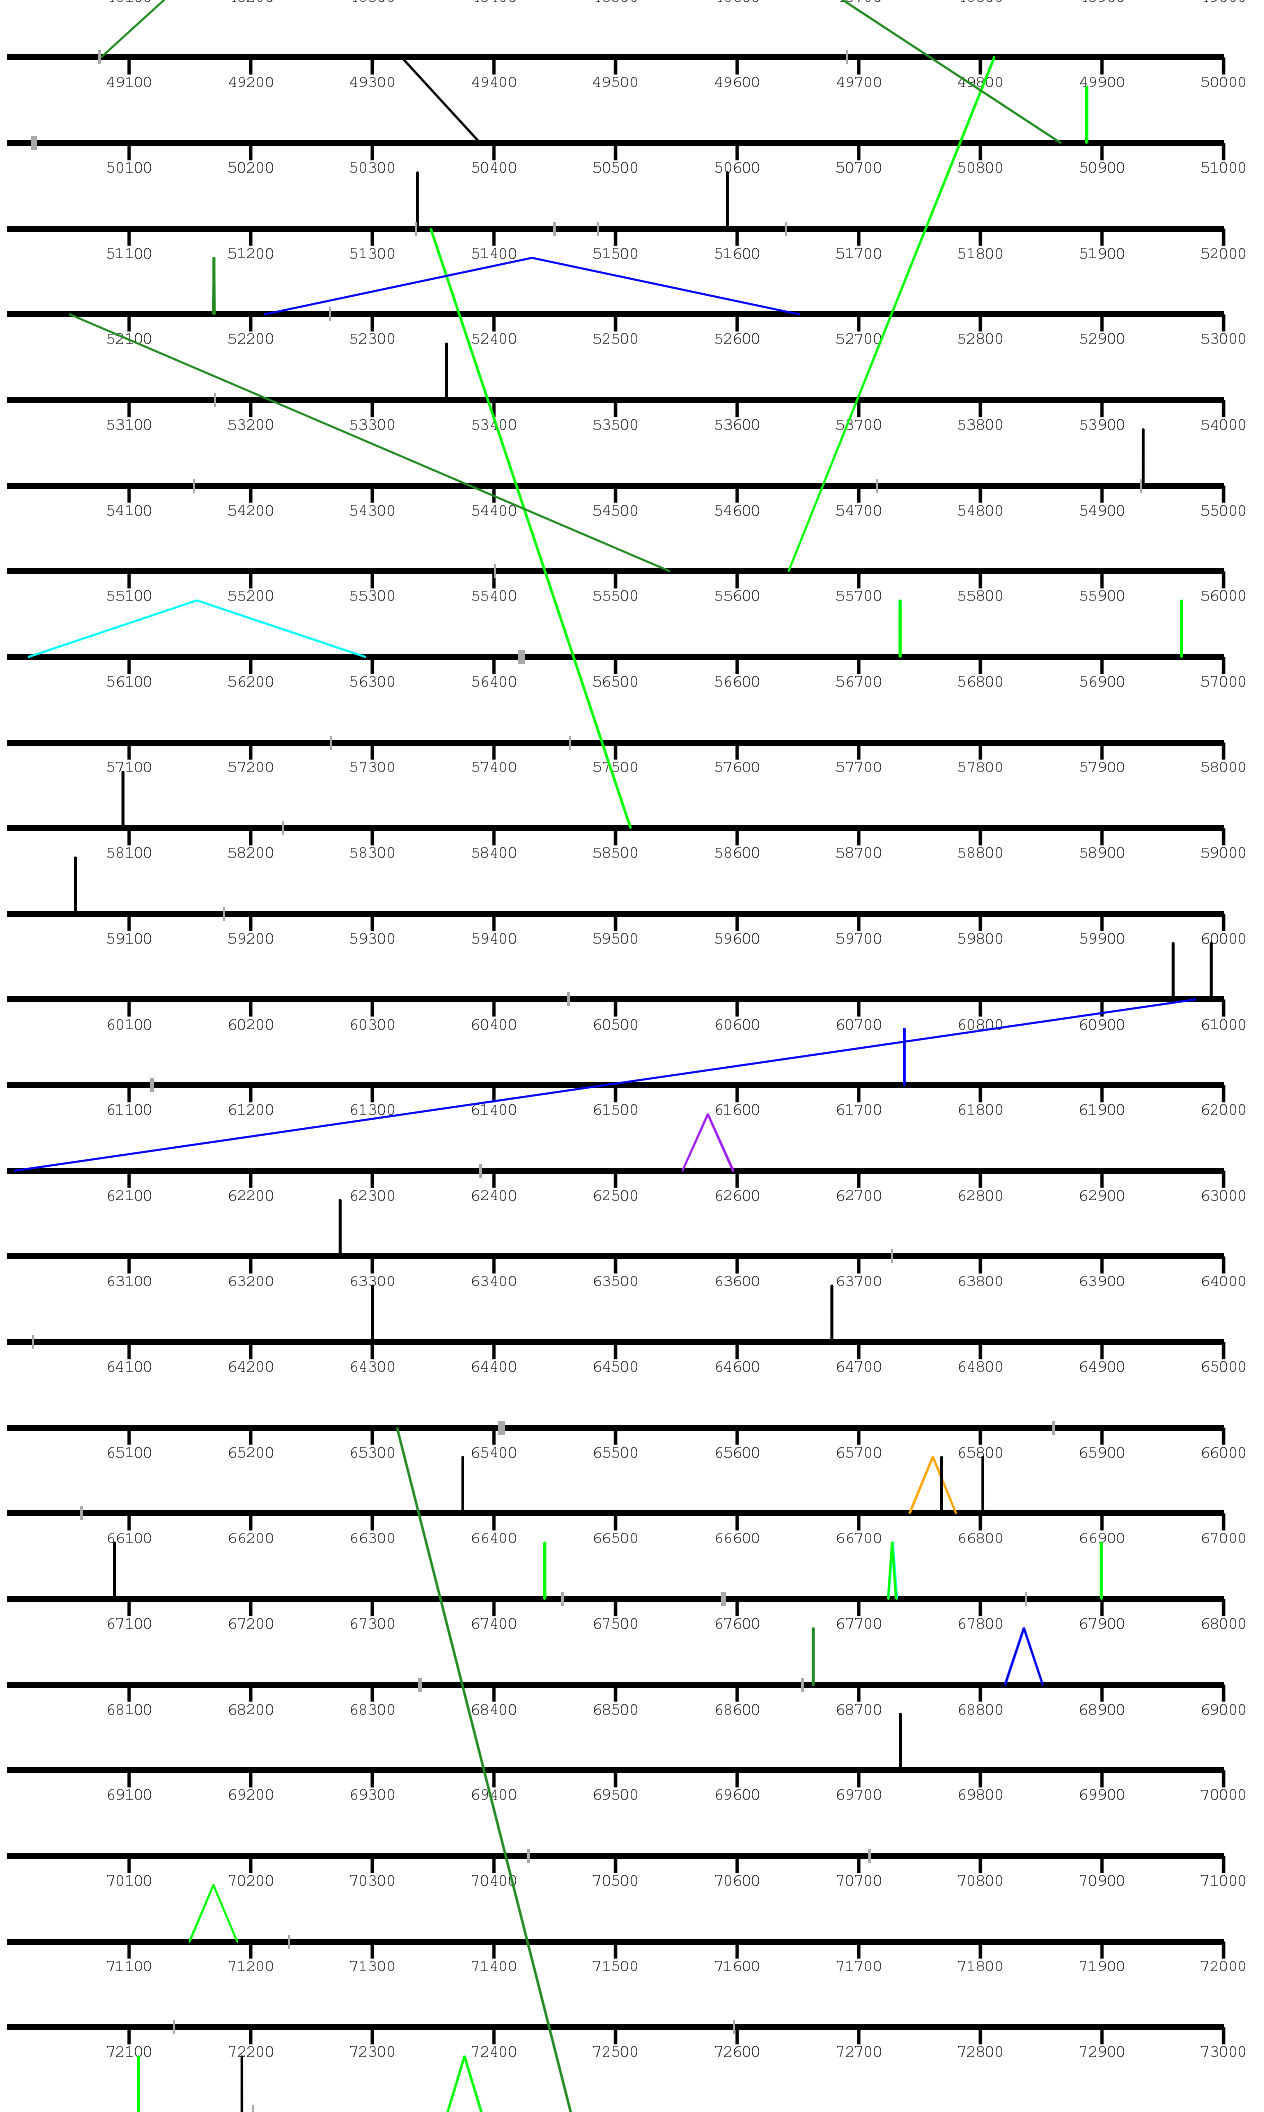

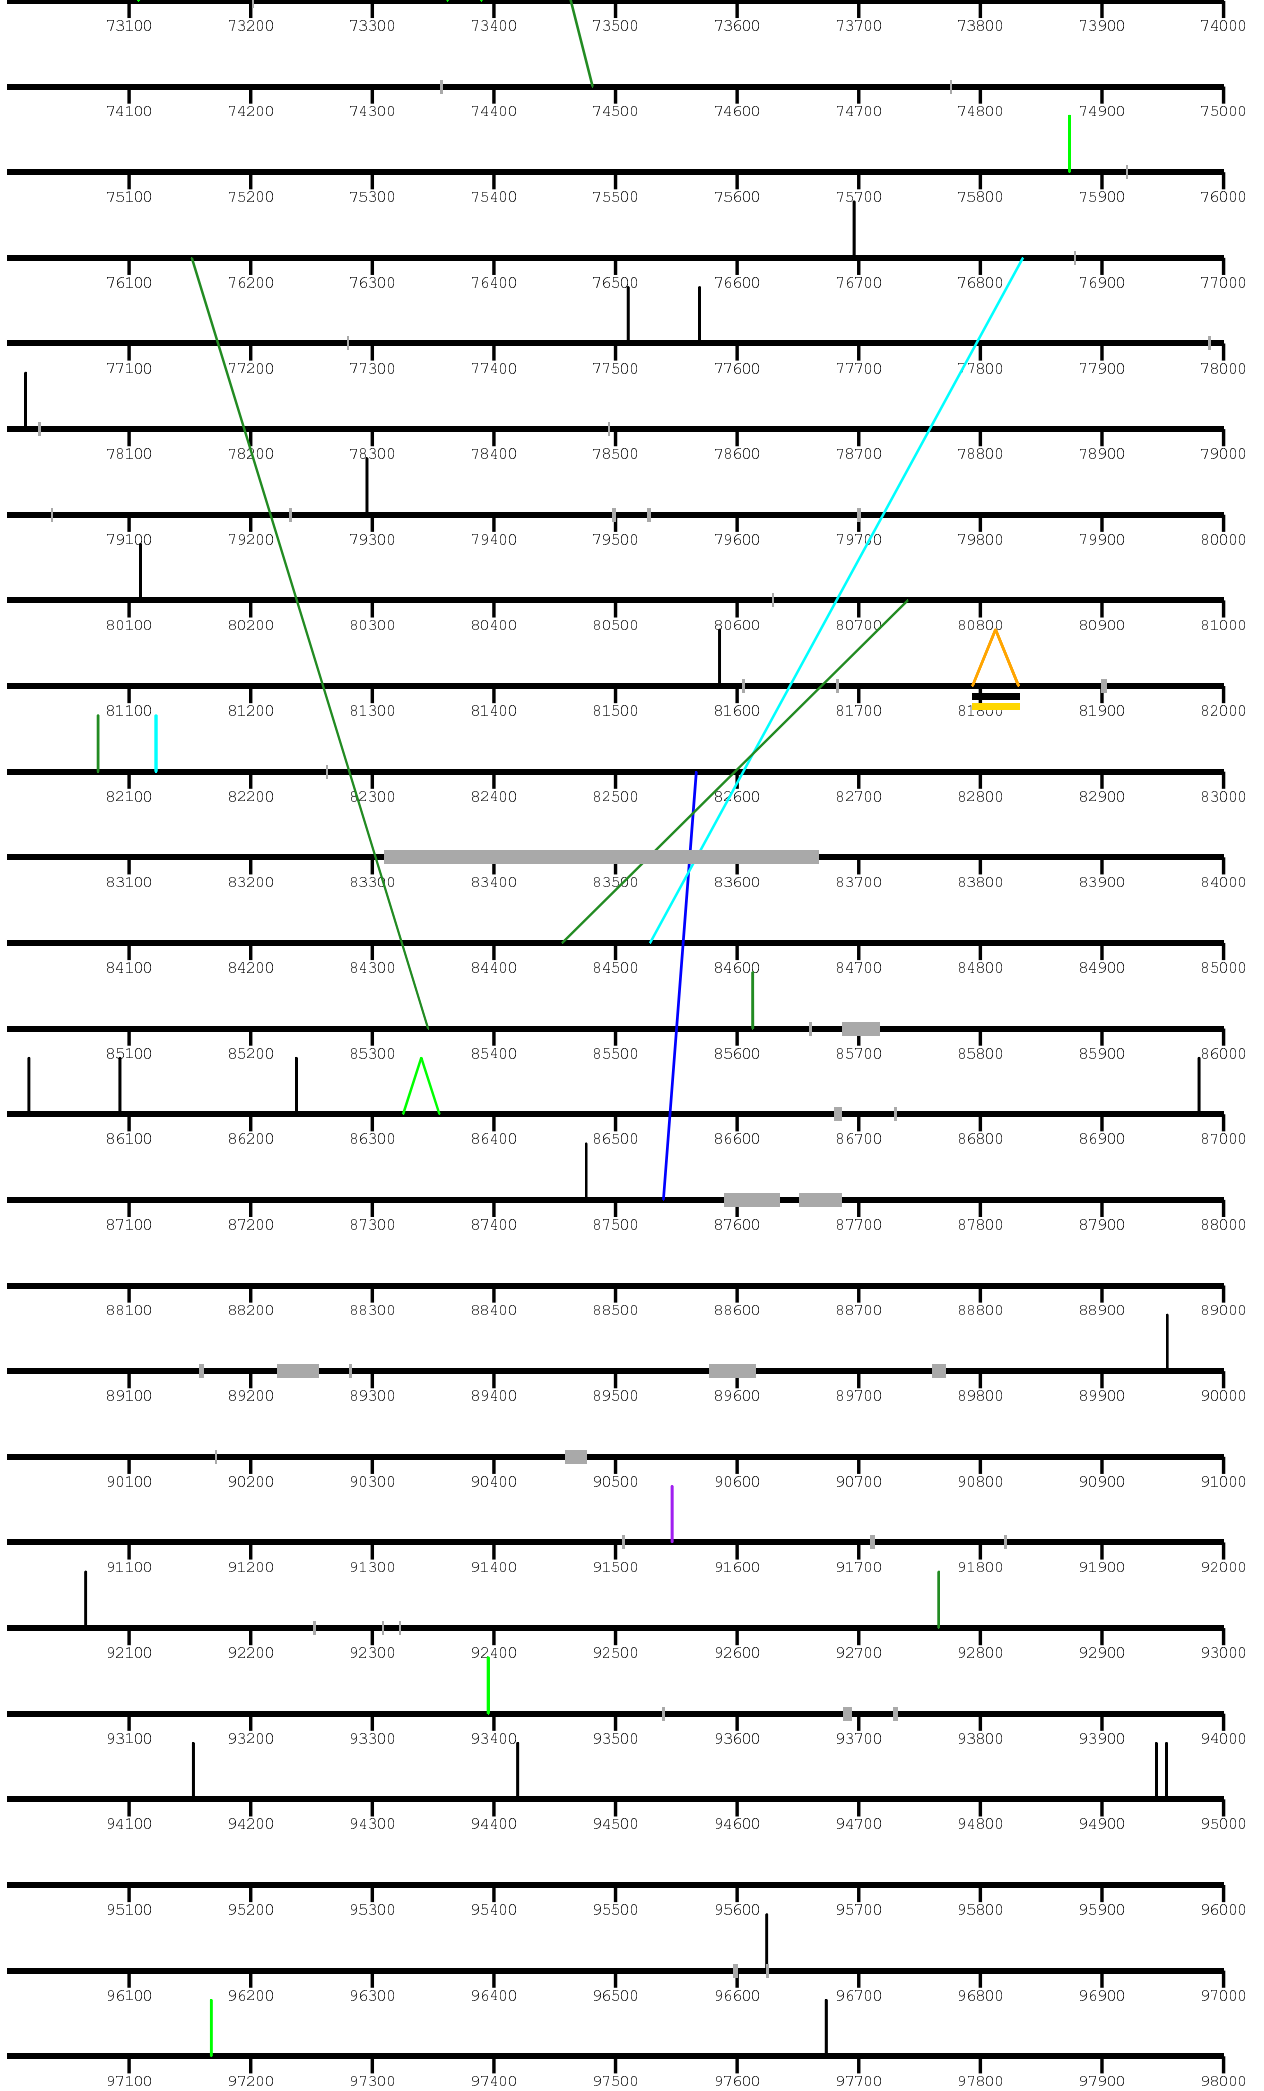

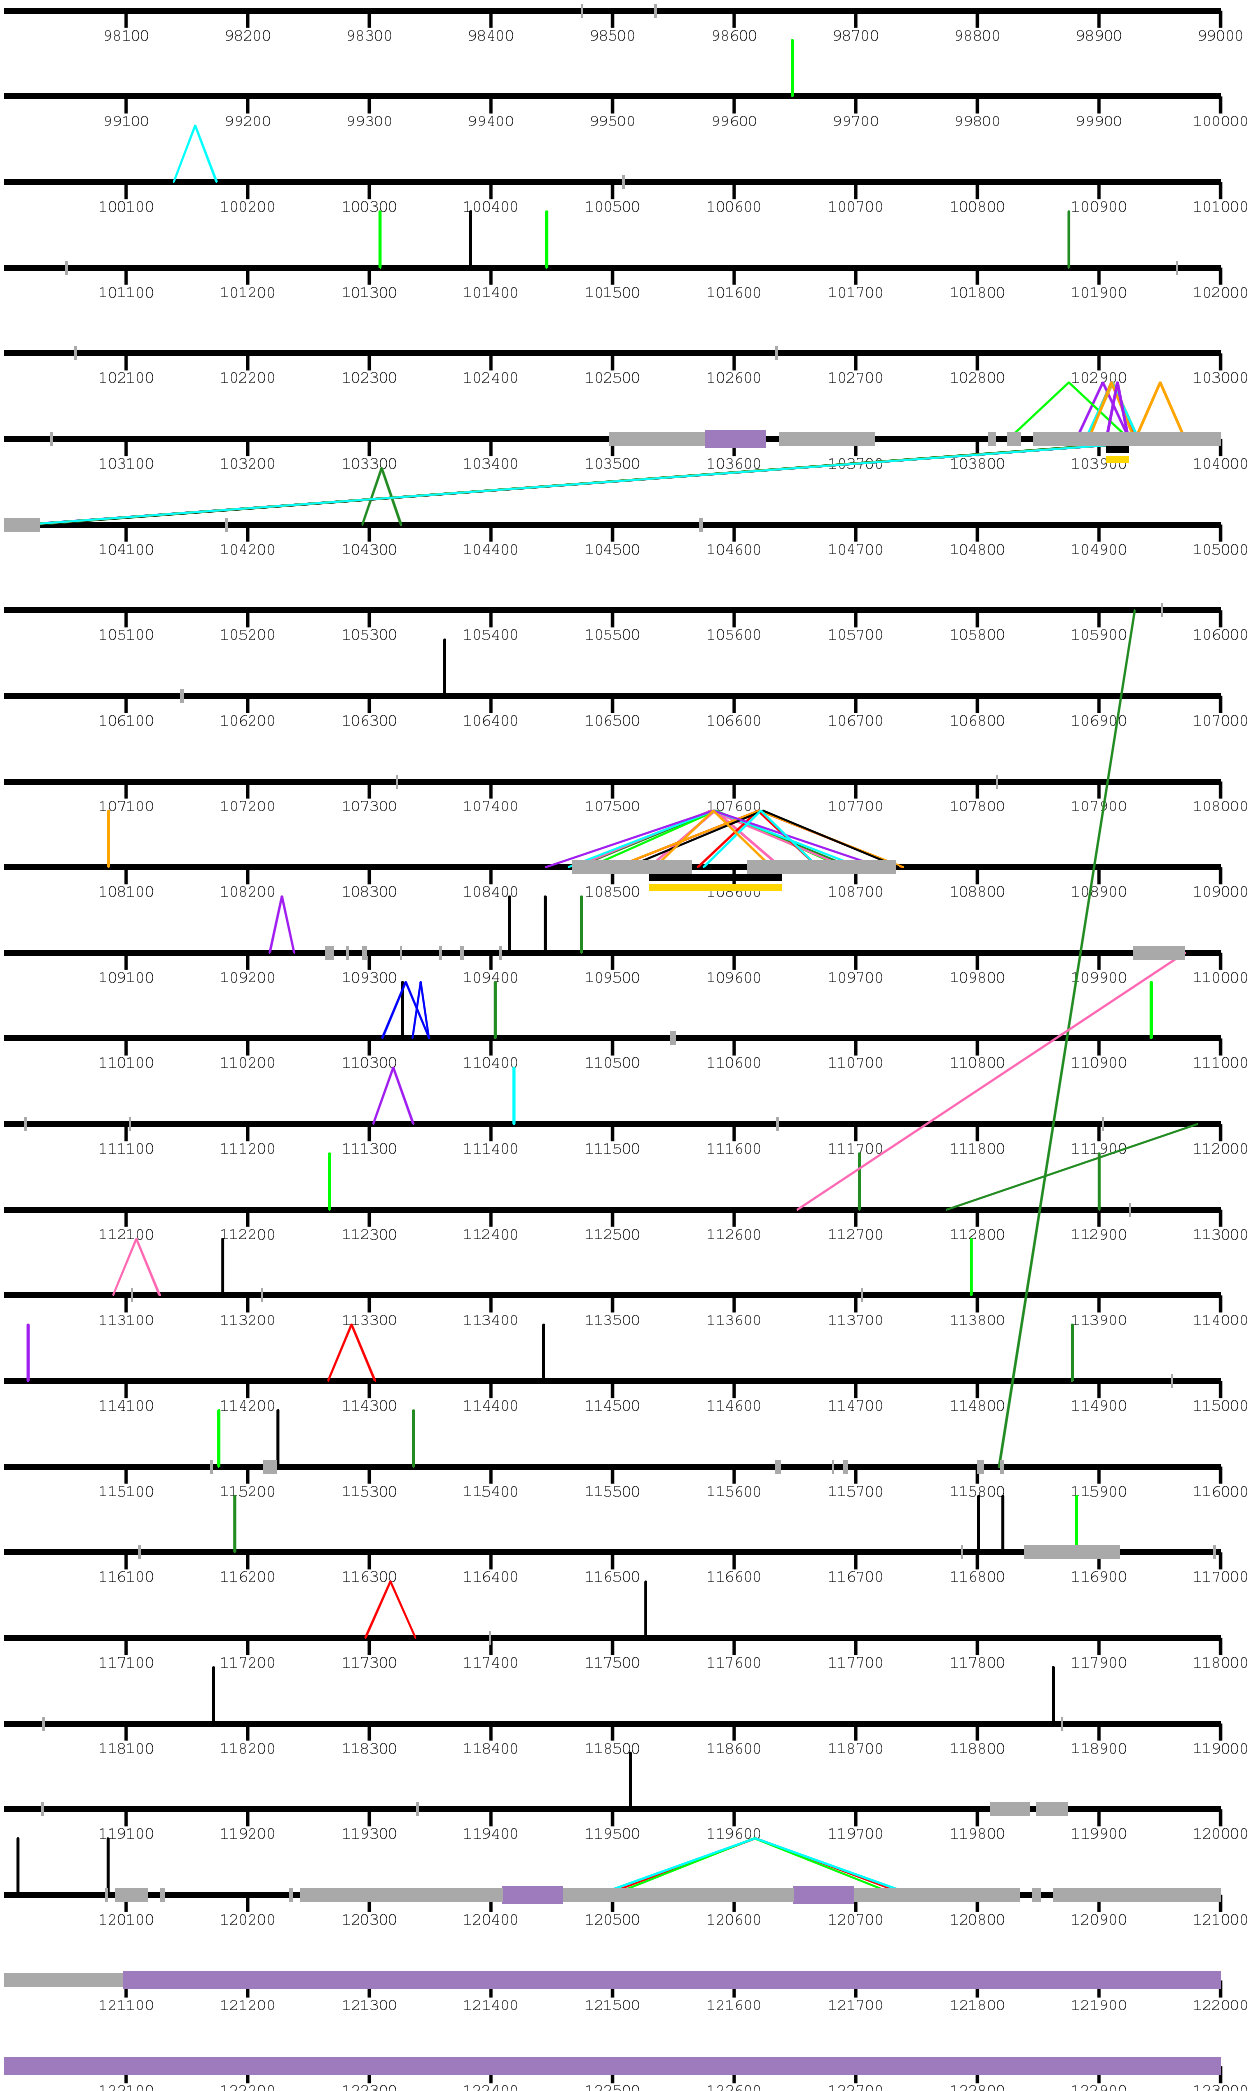

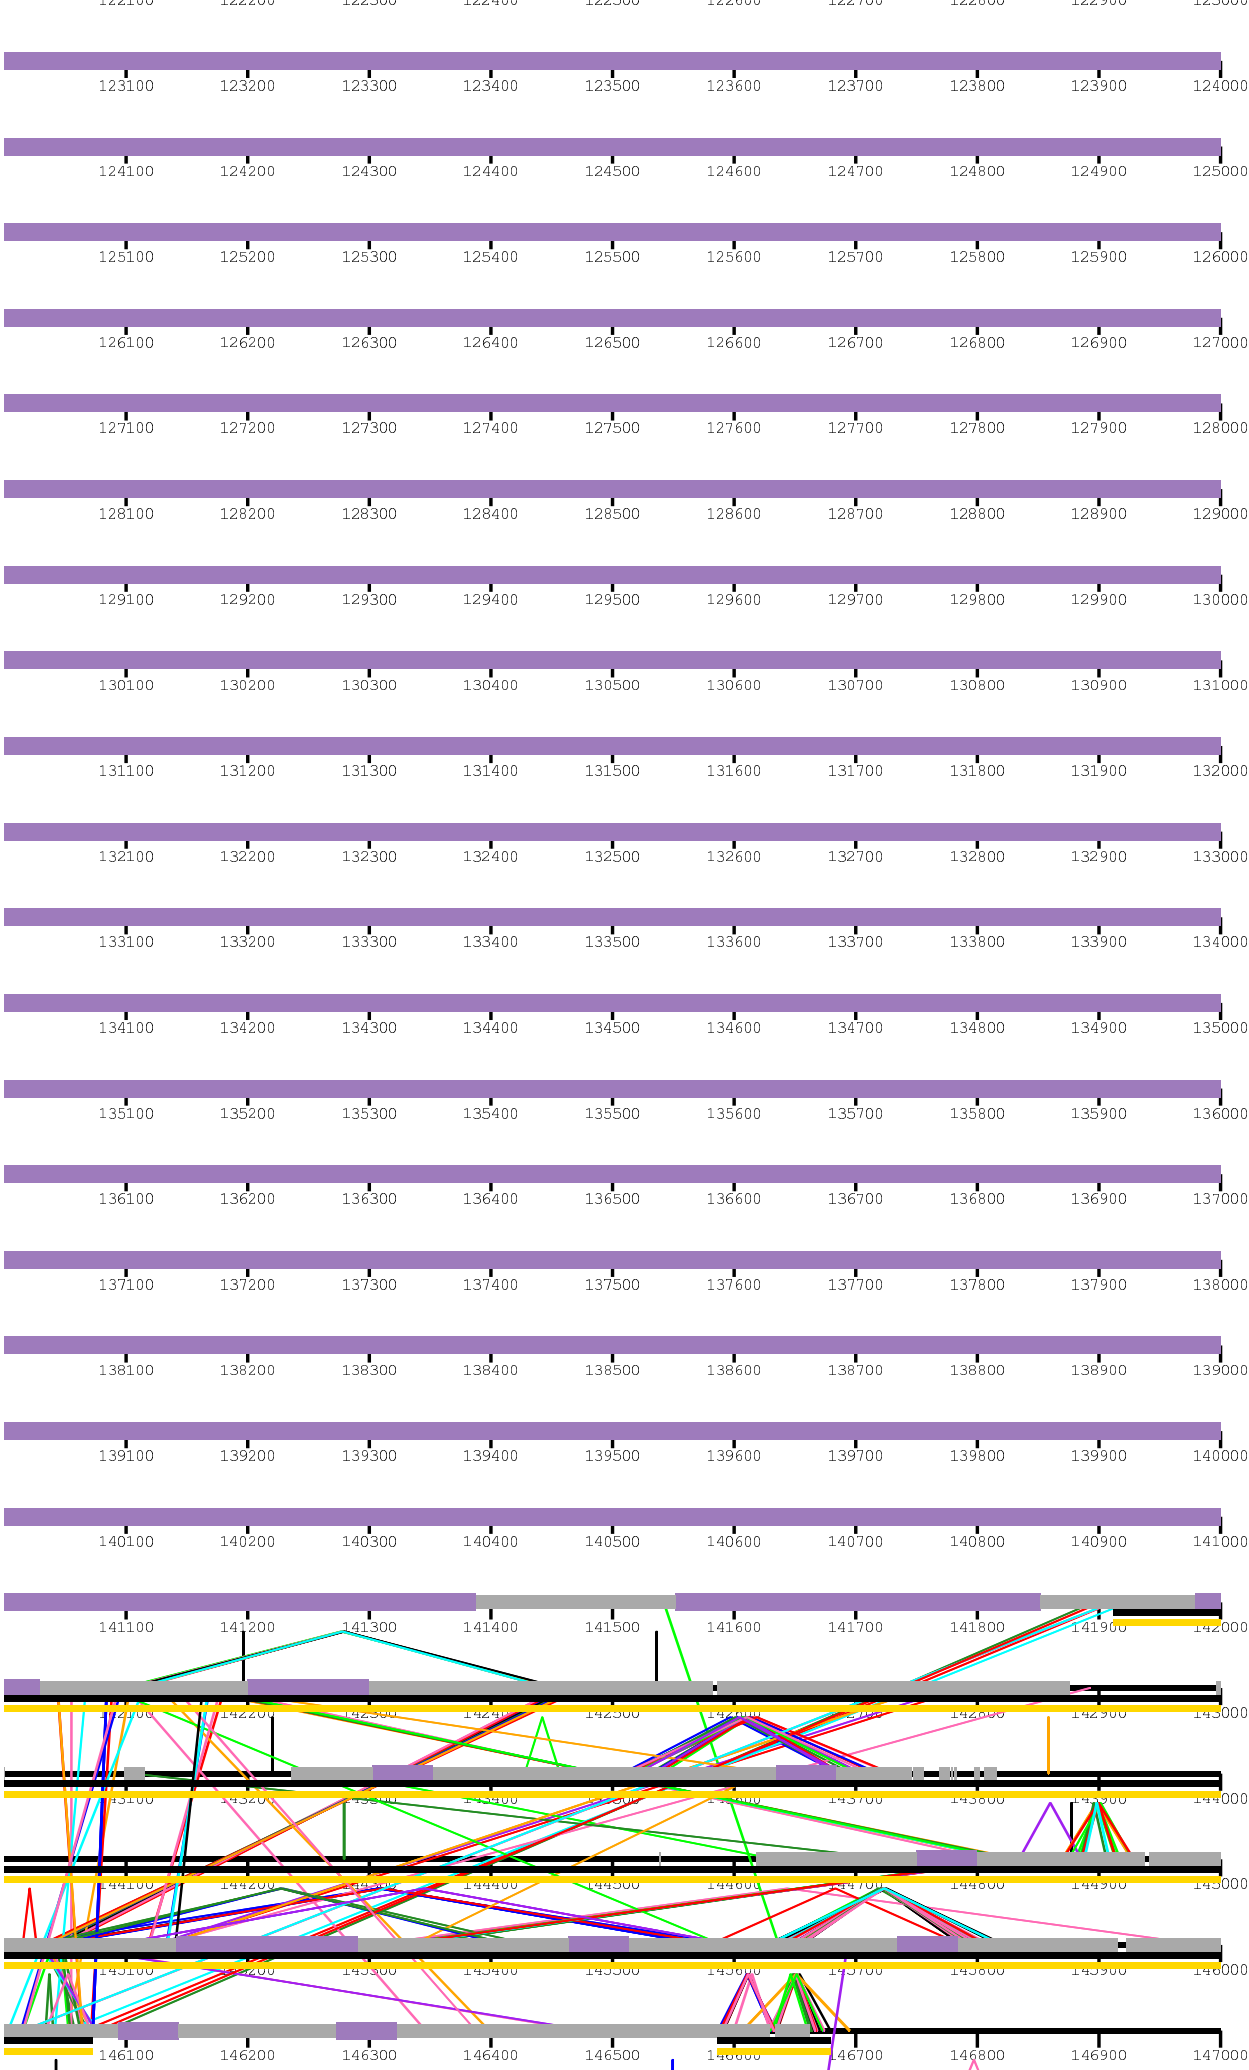

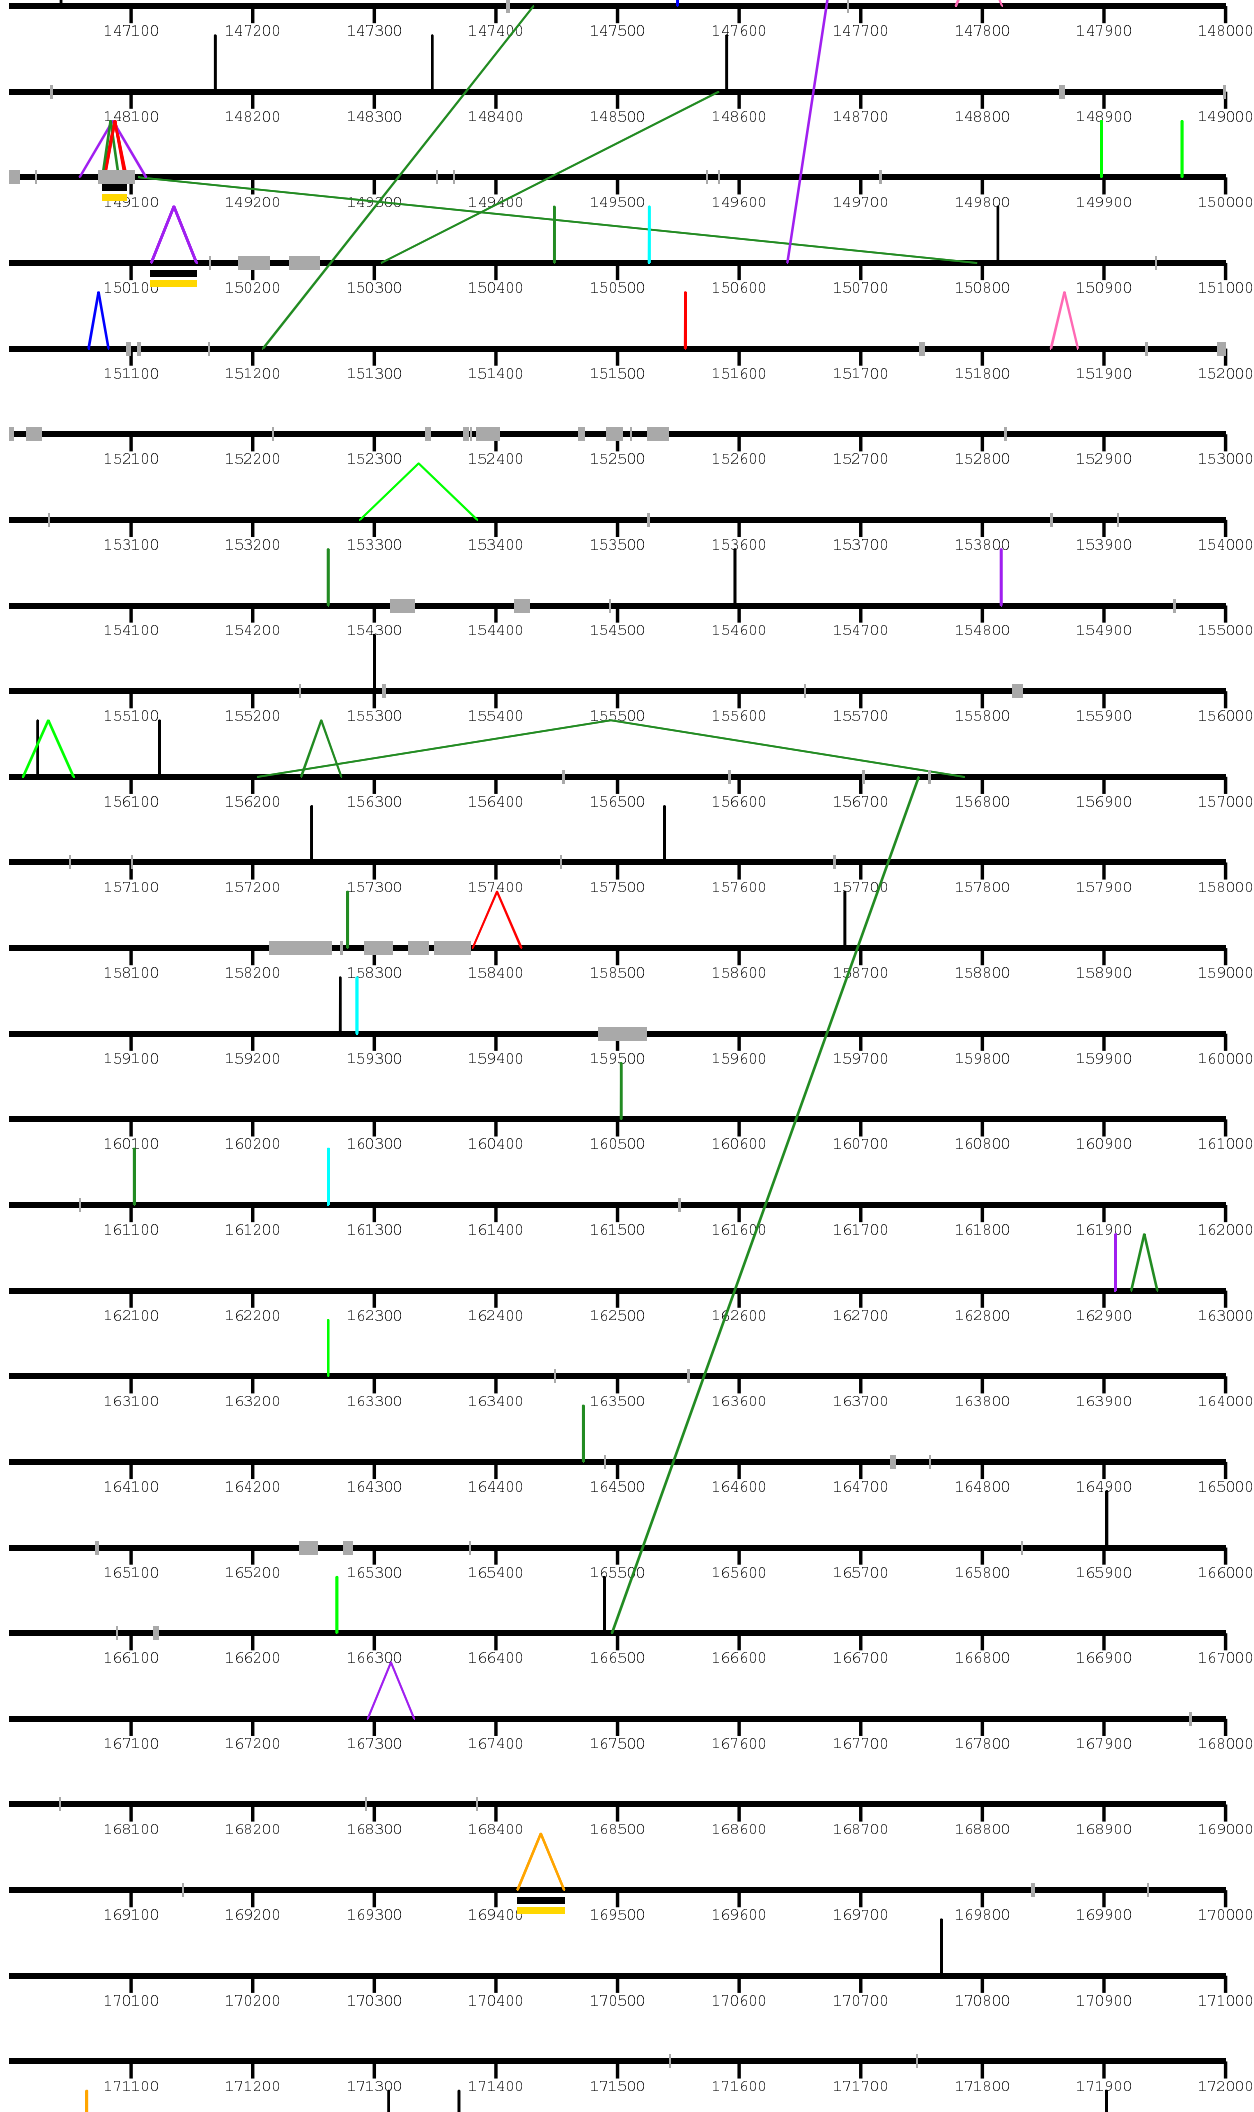

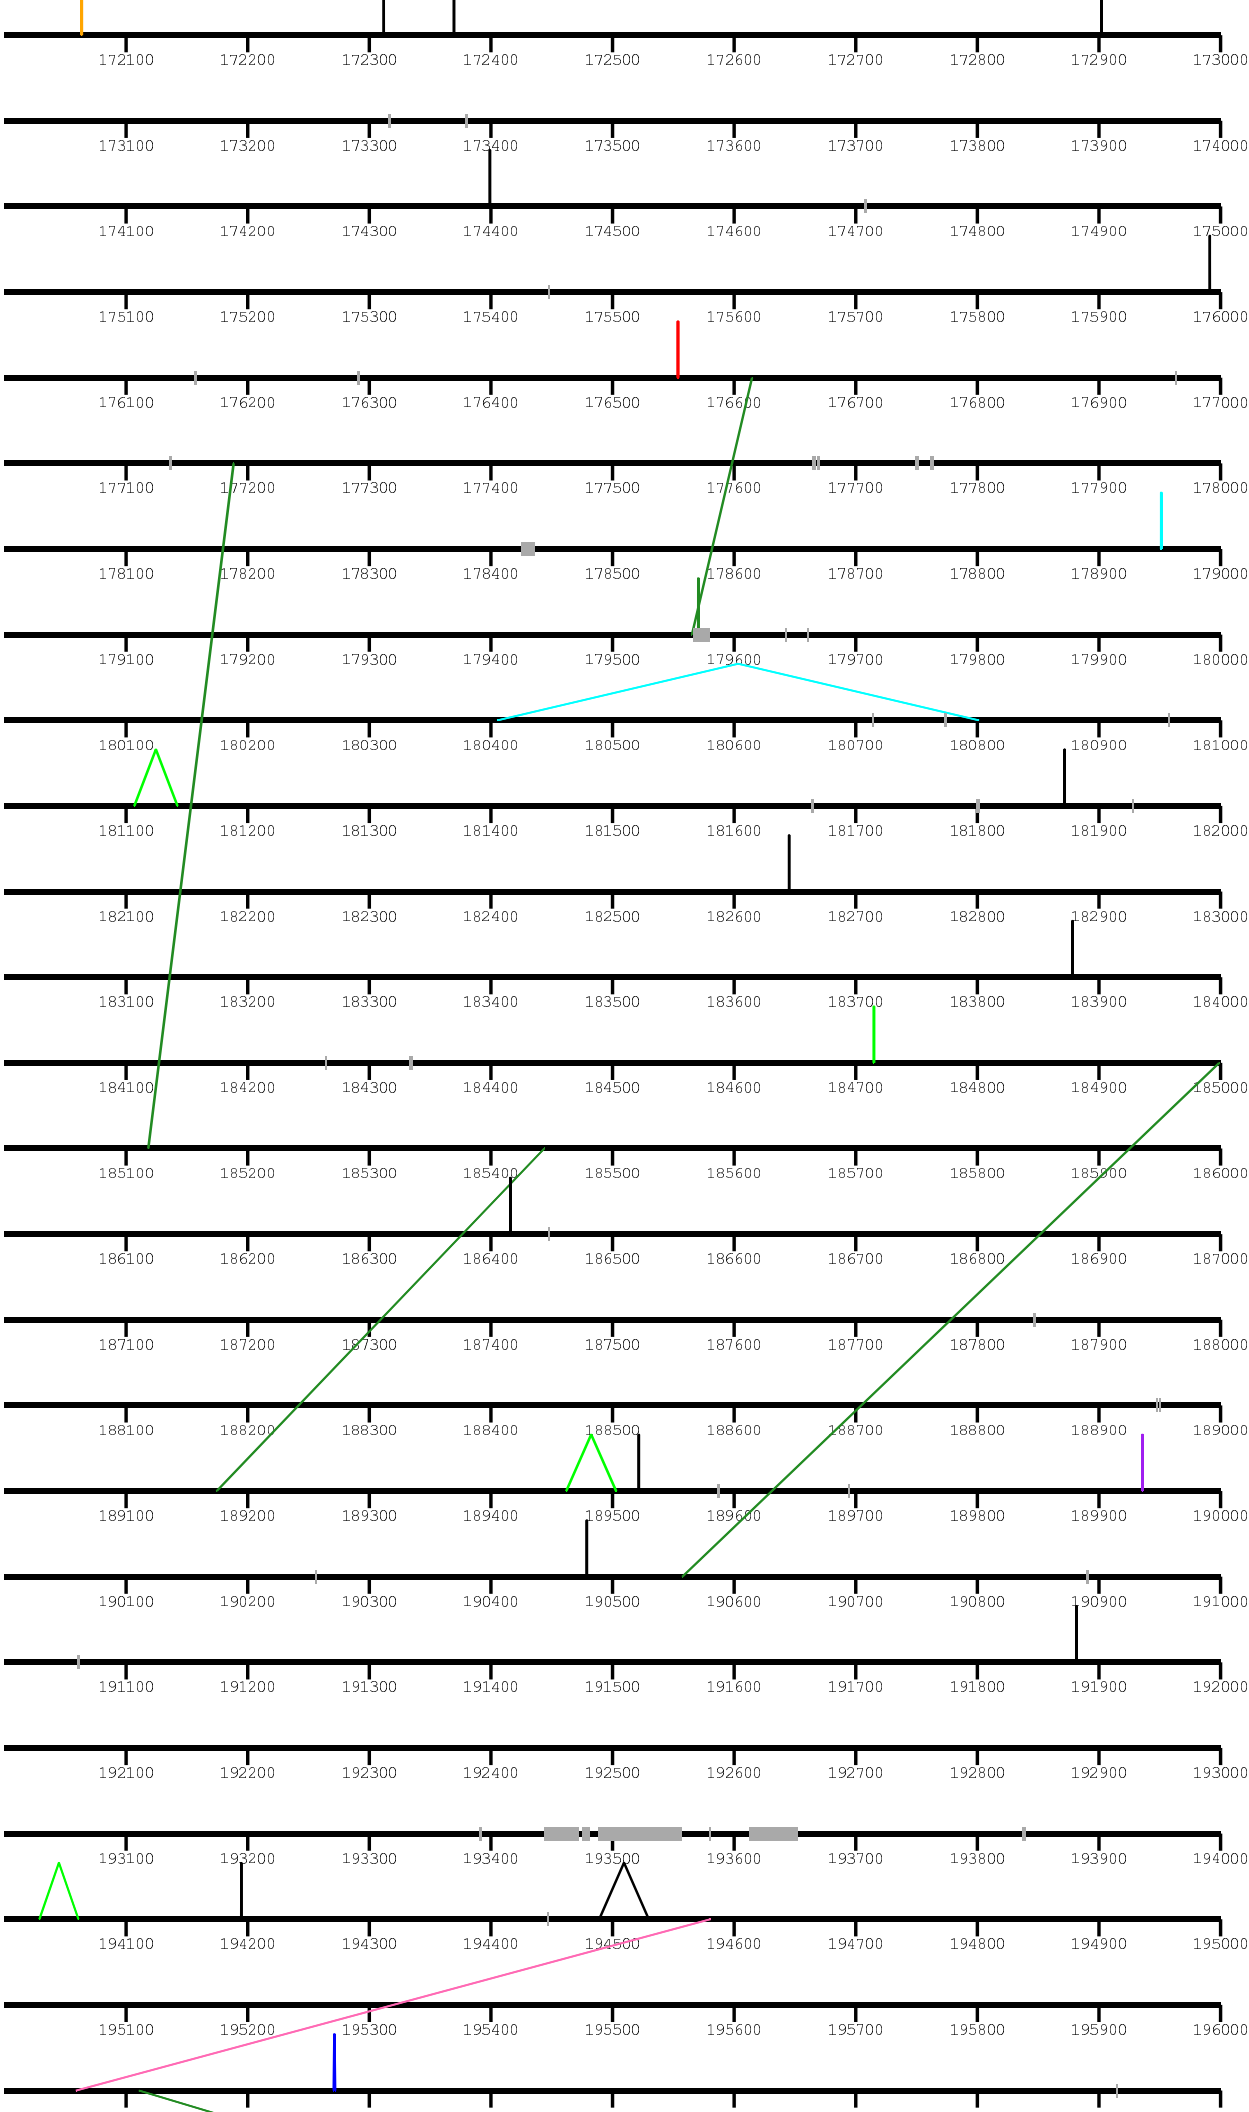



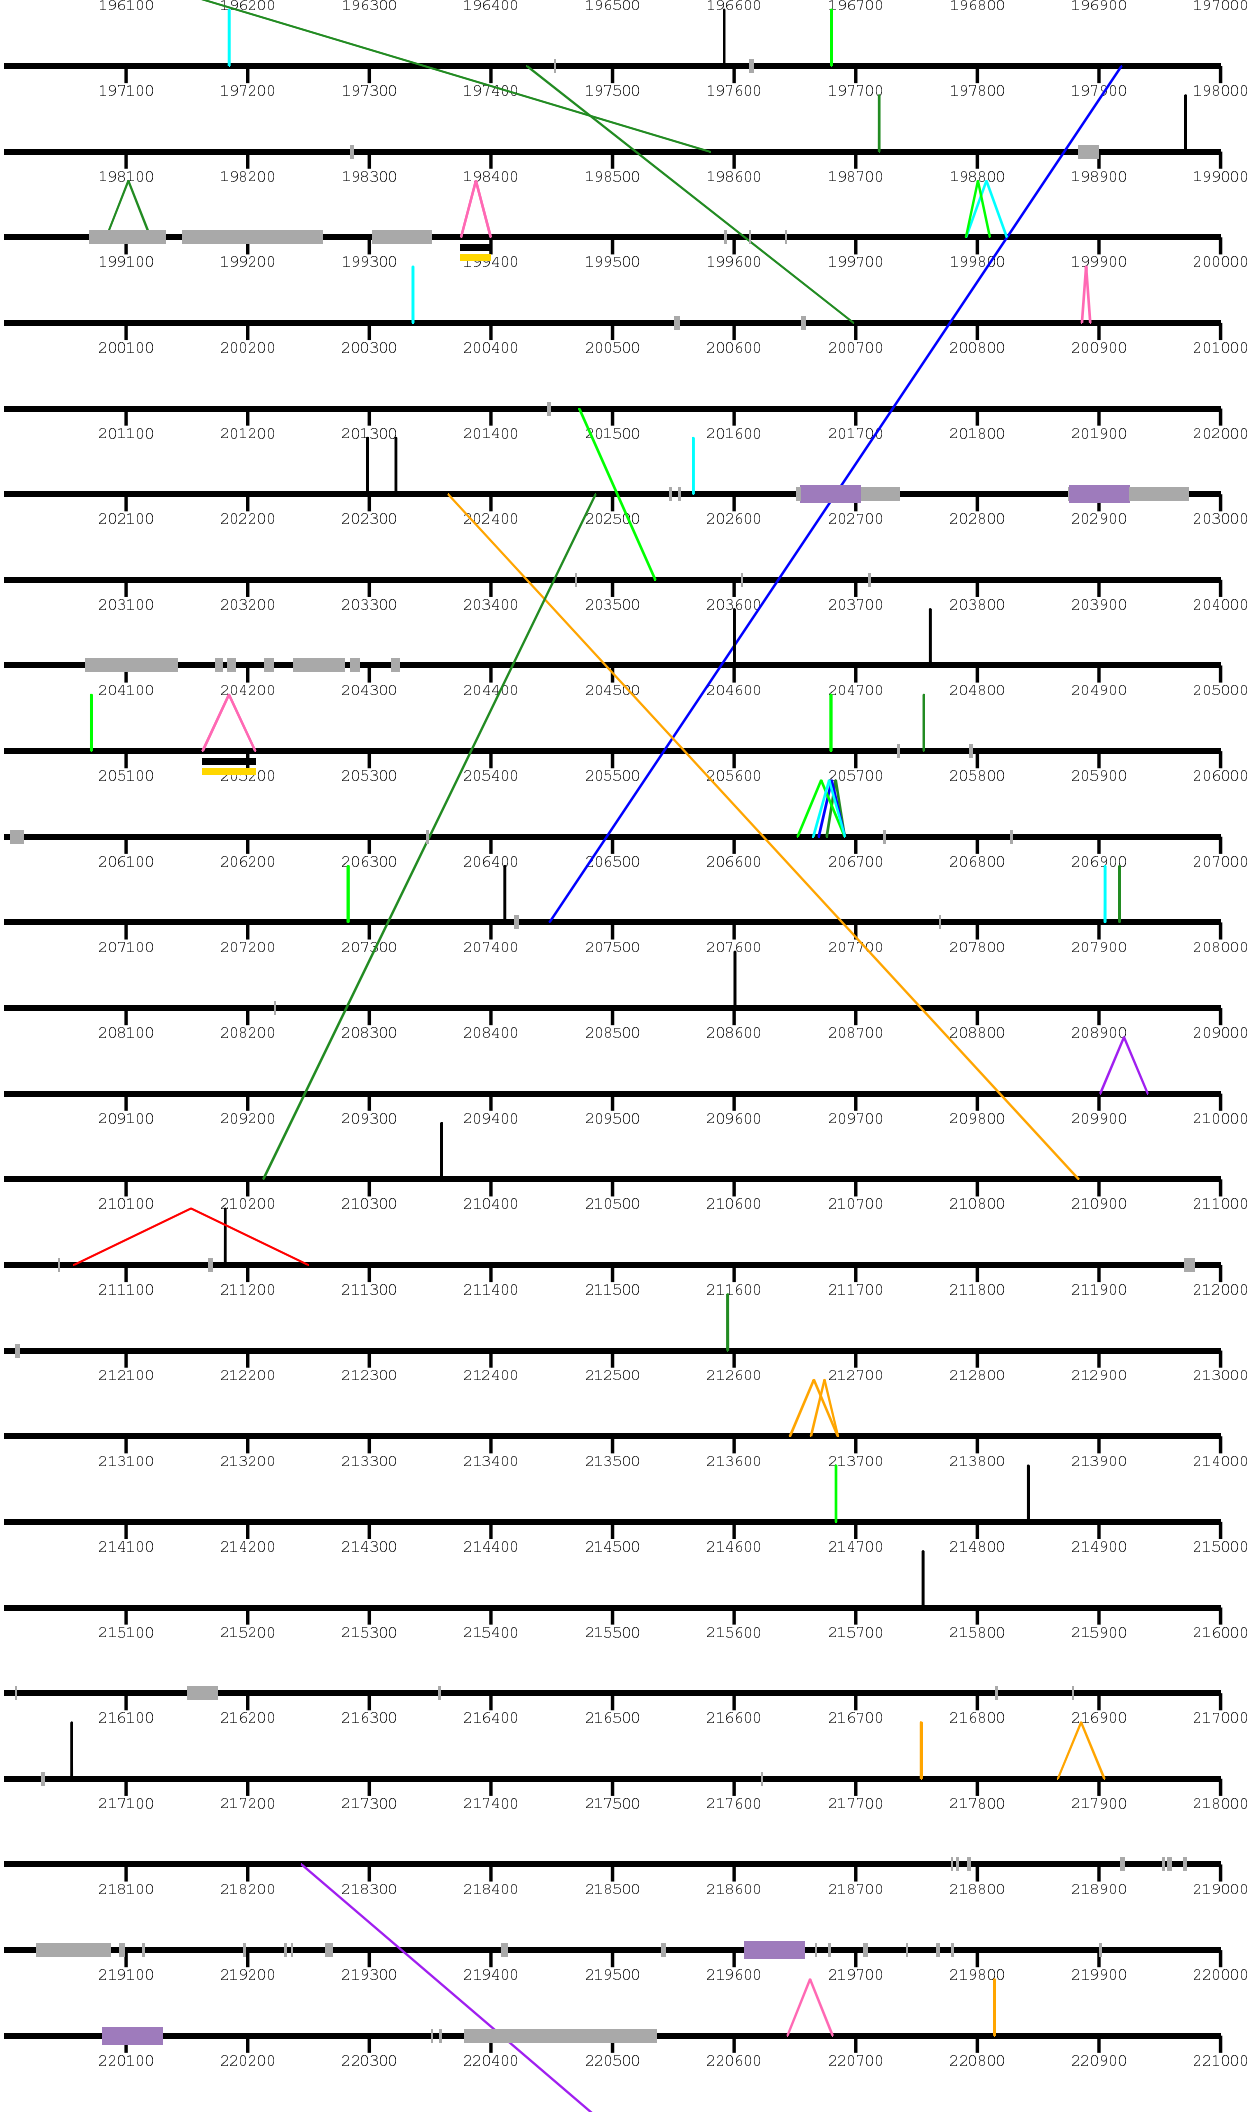

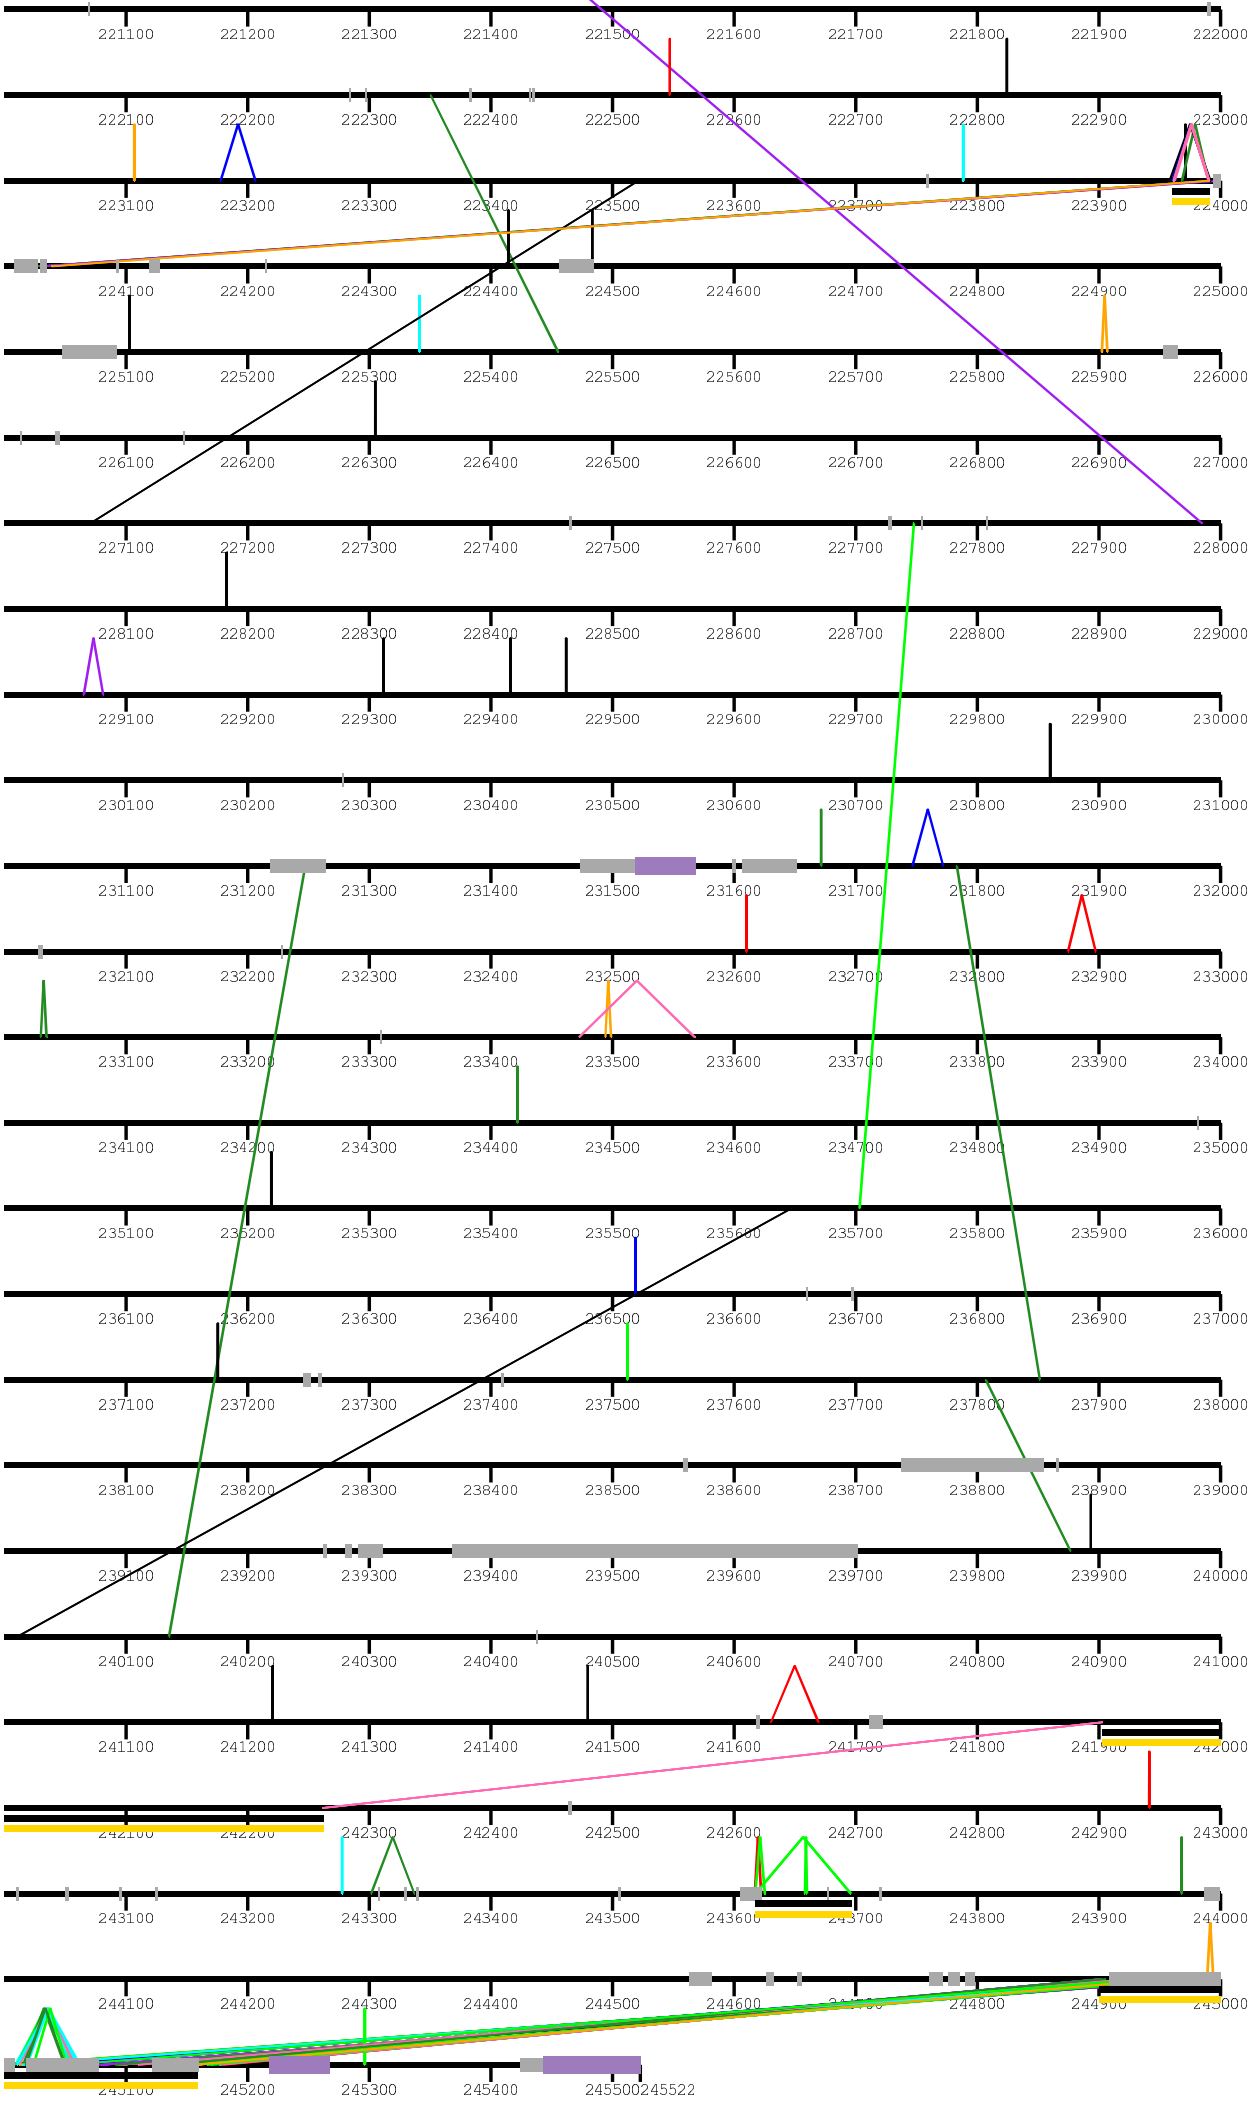

chr2

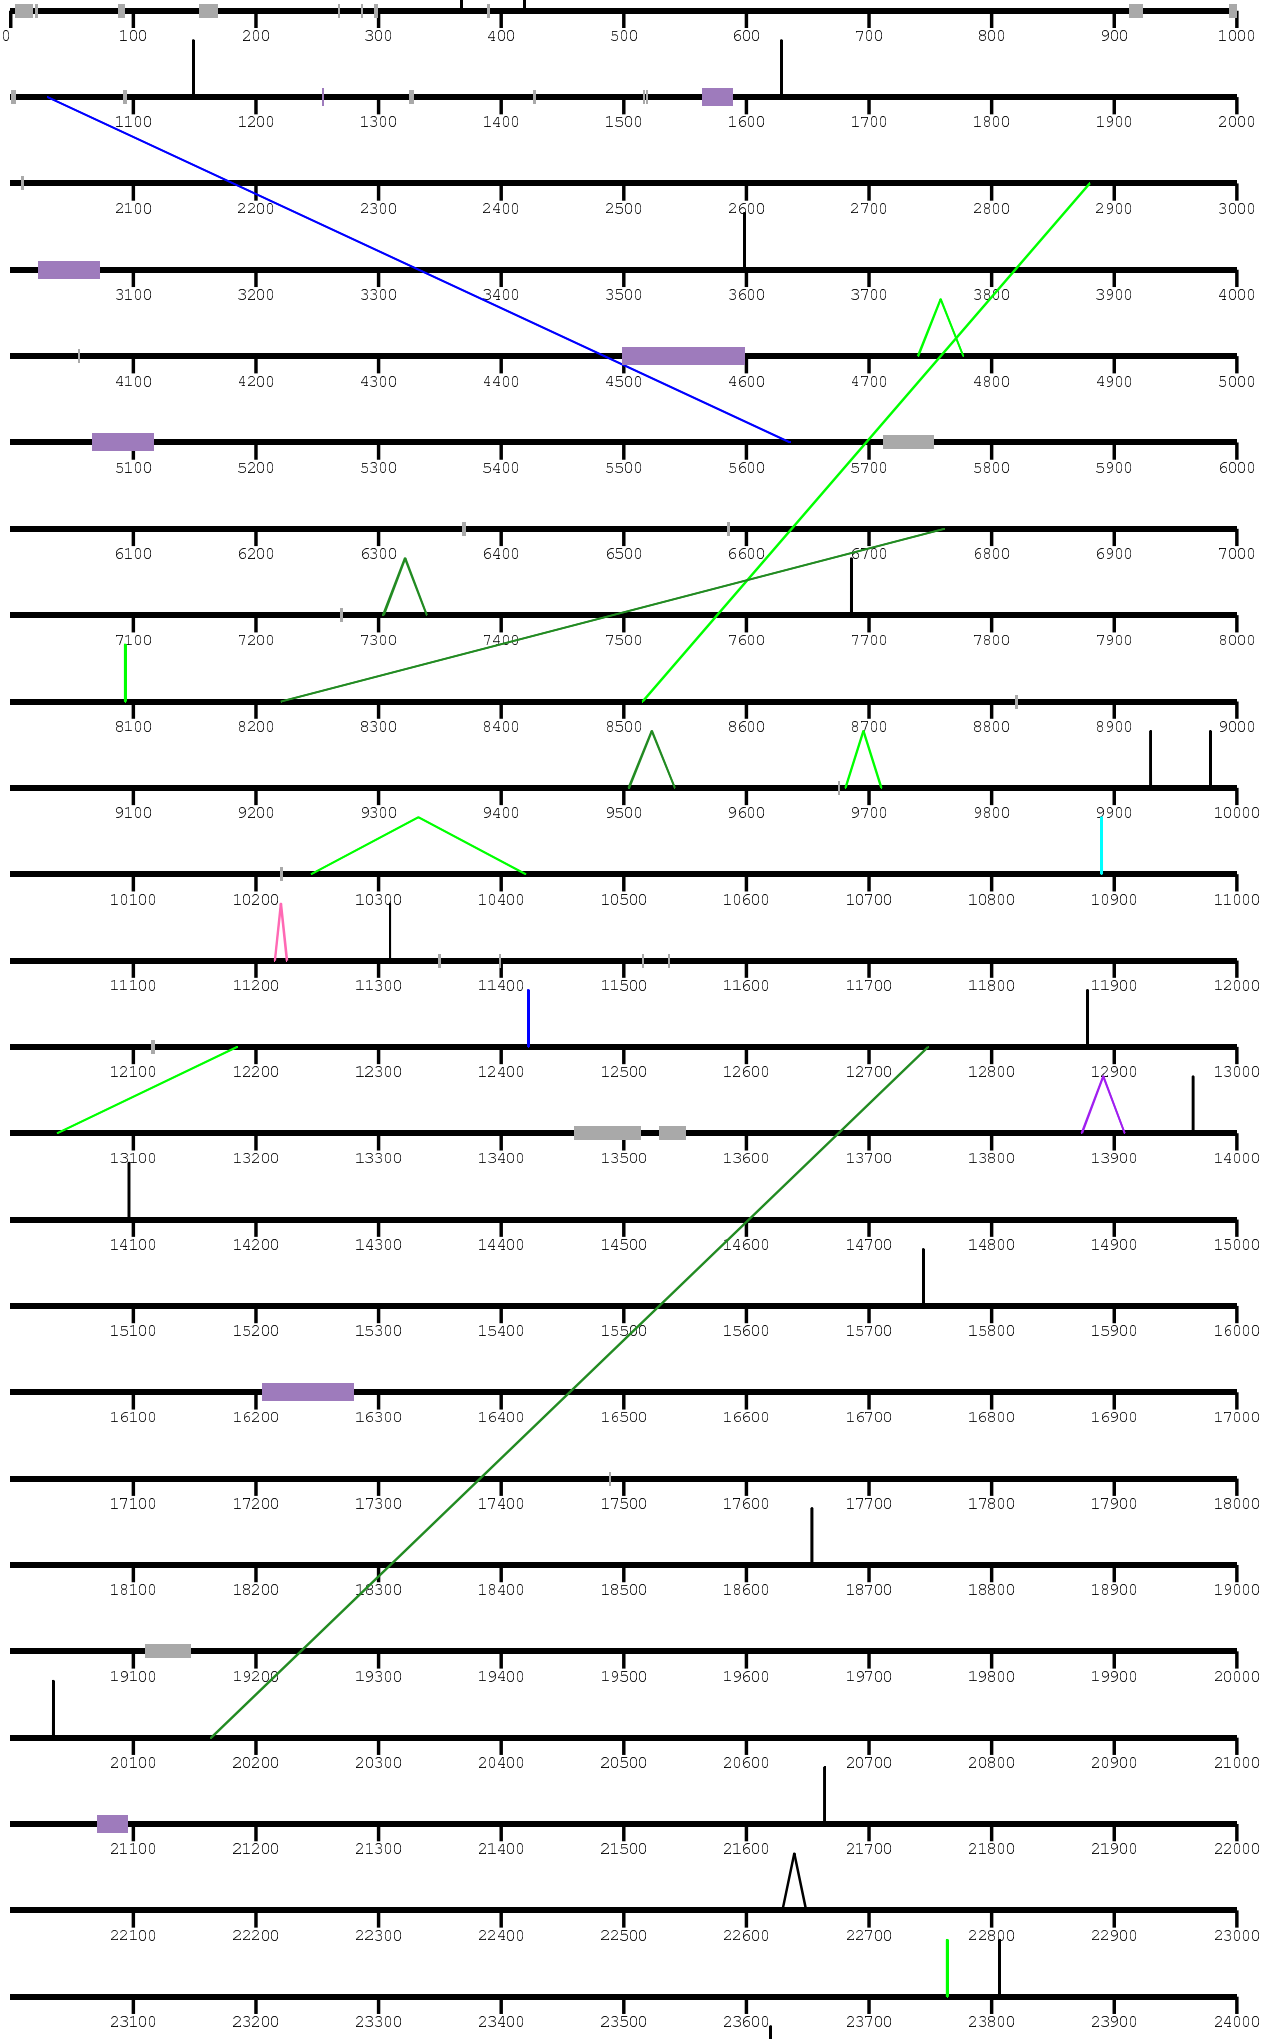

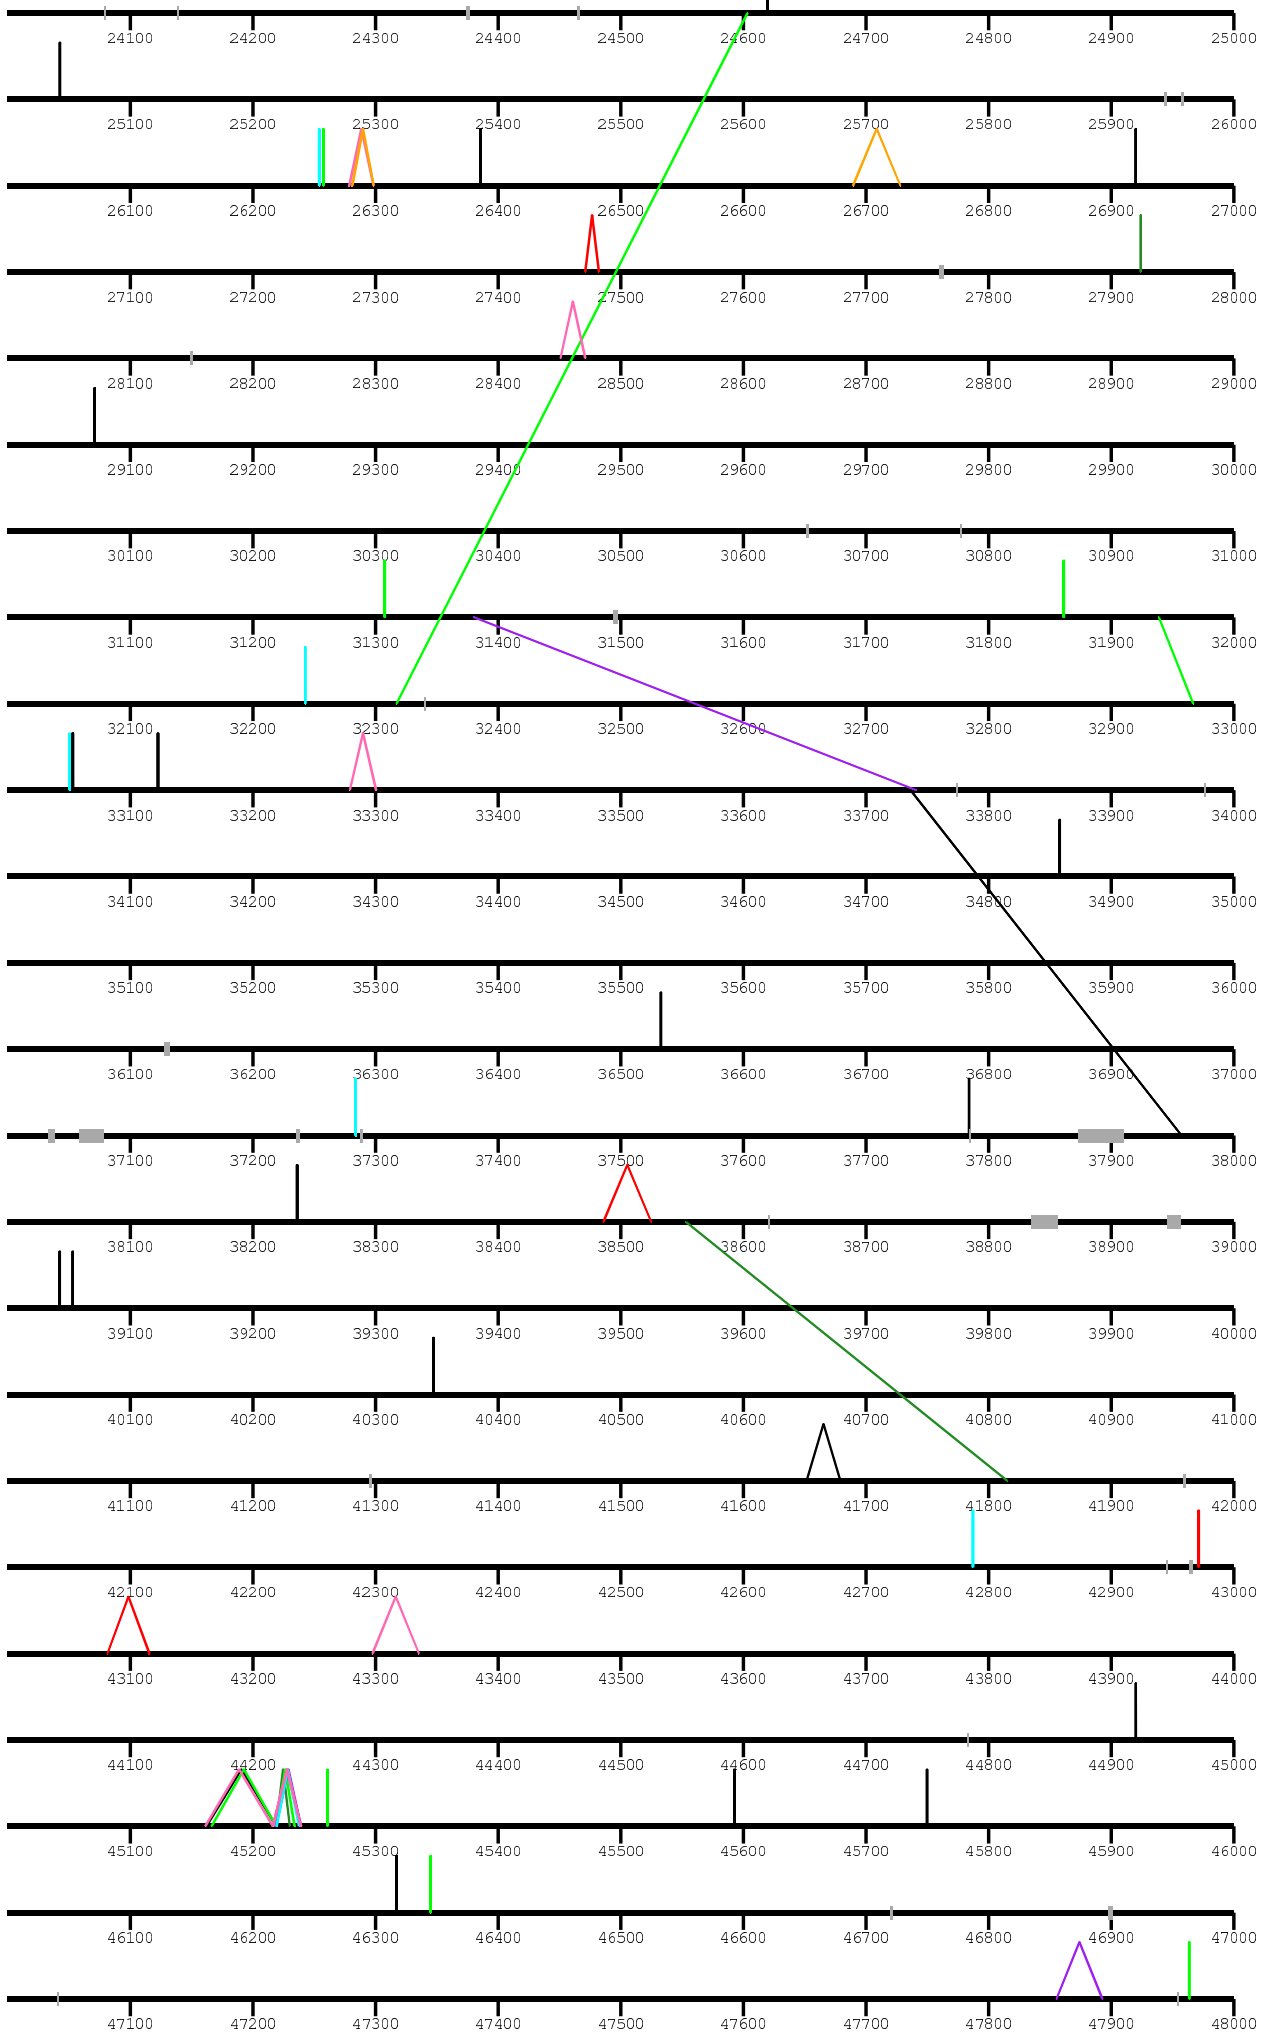

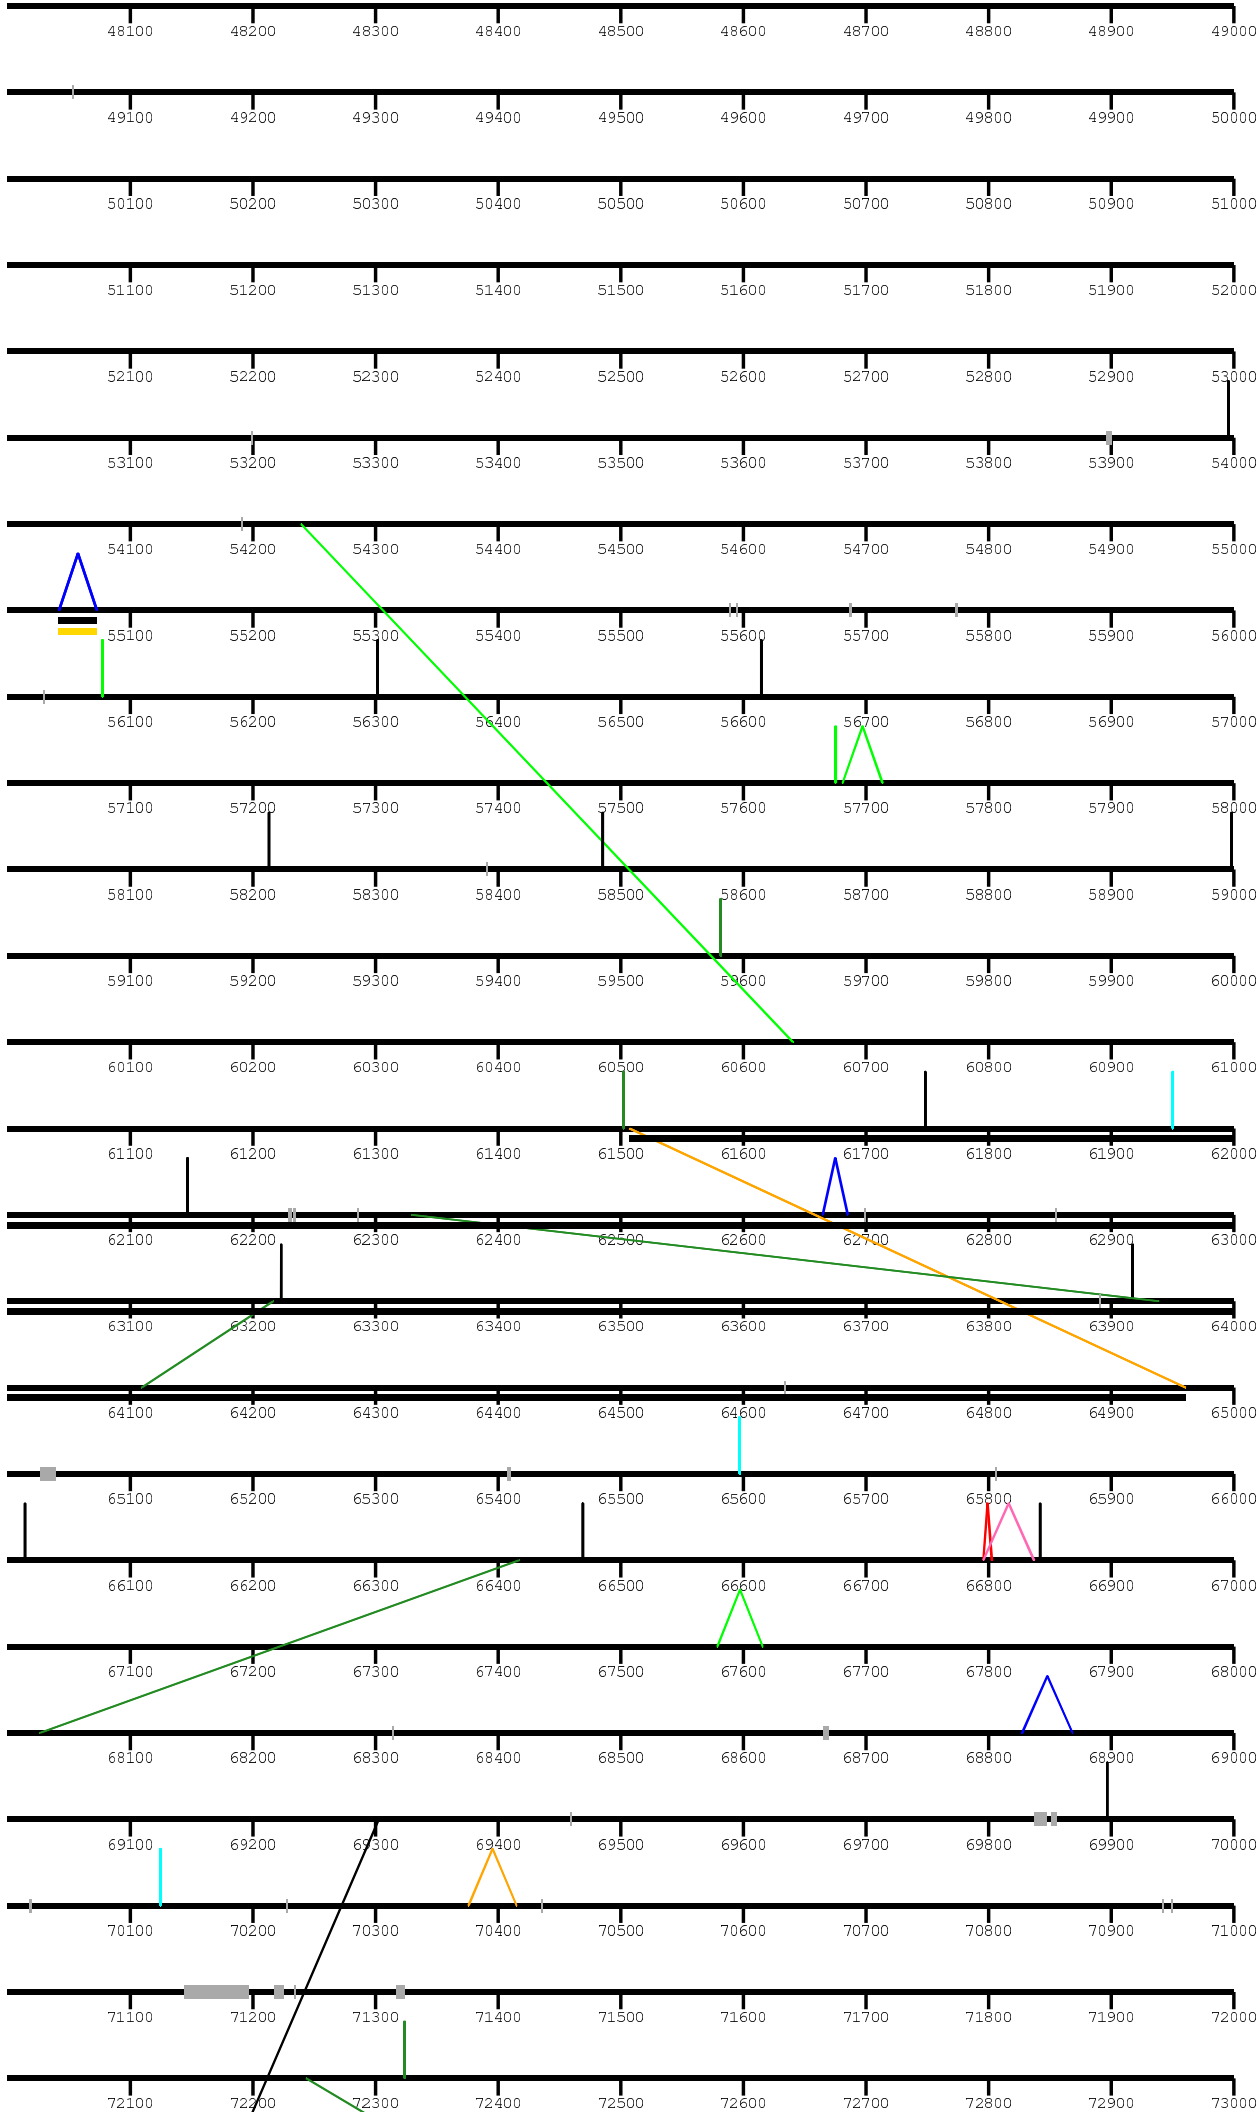

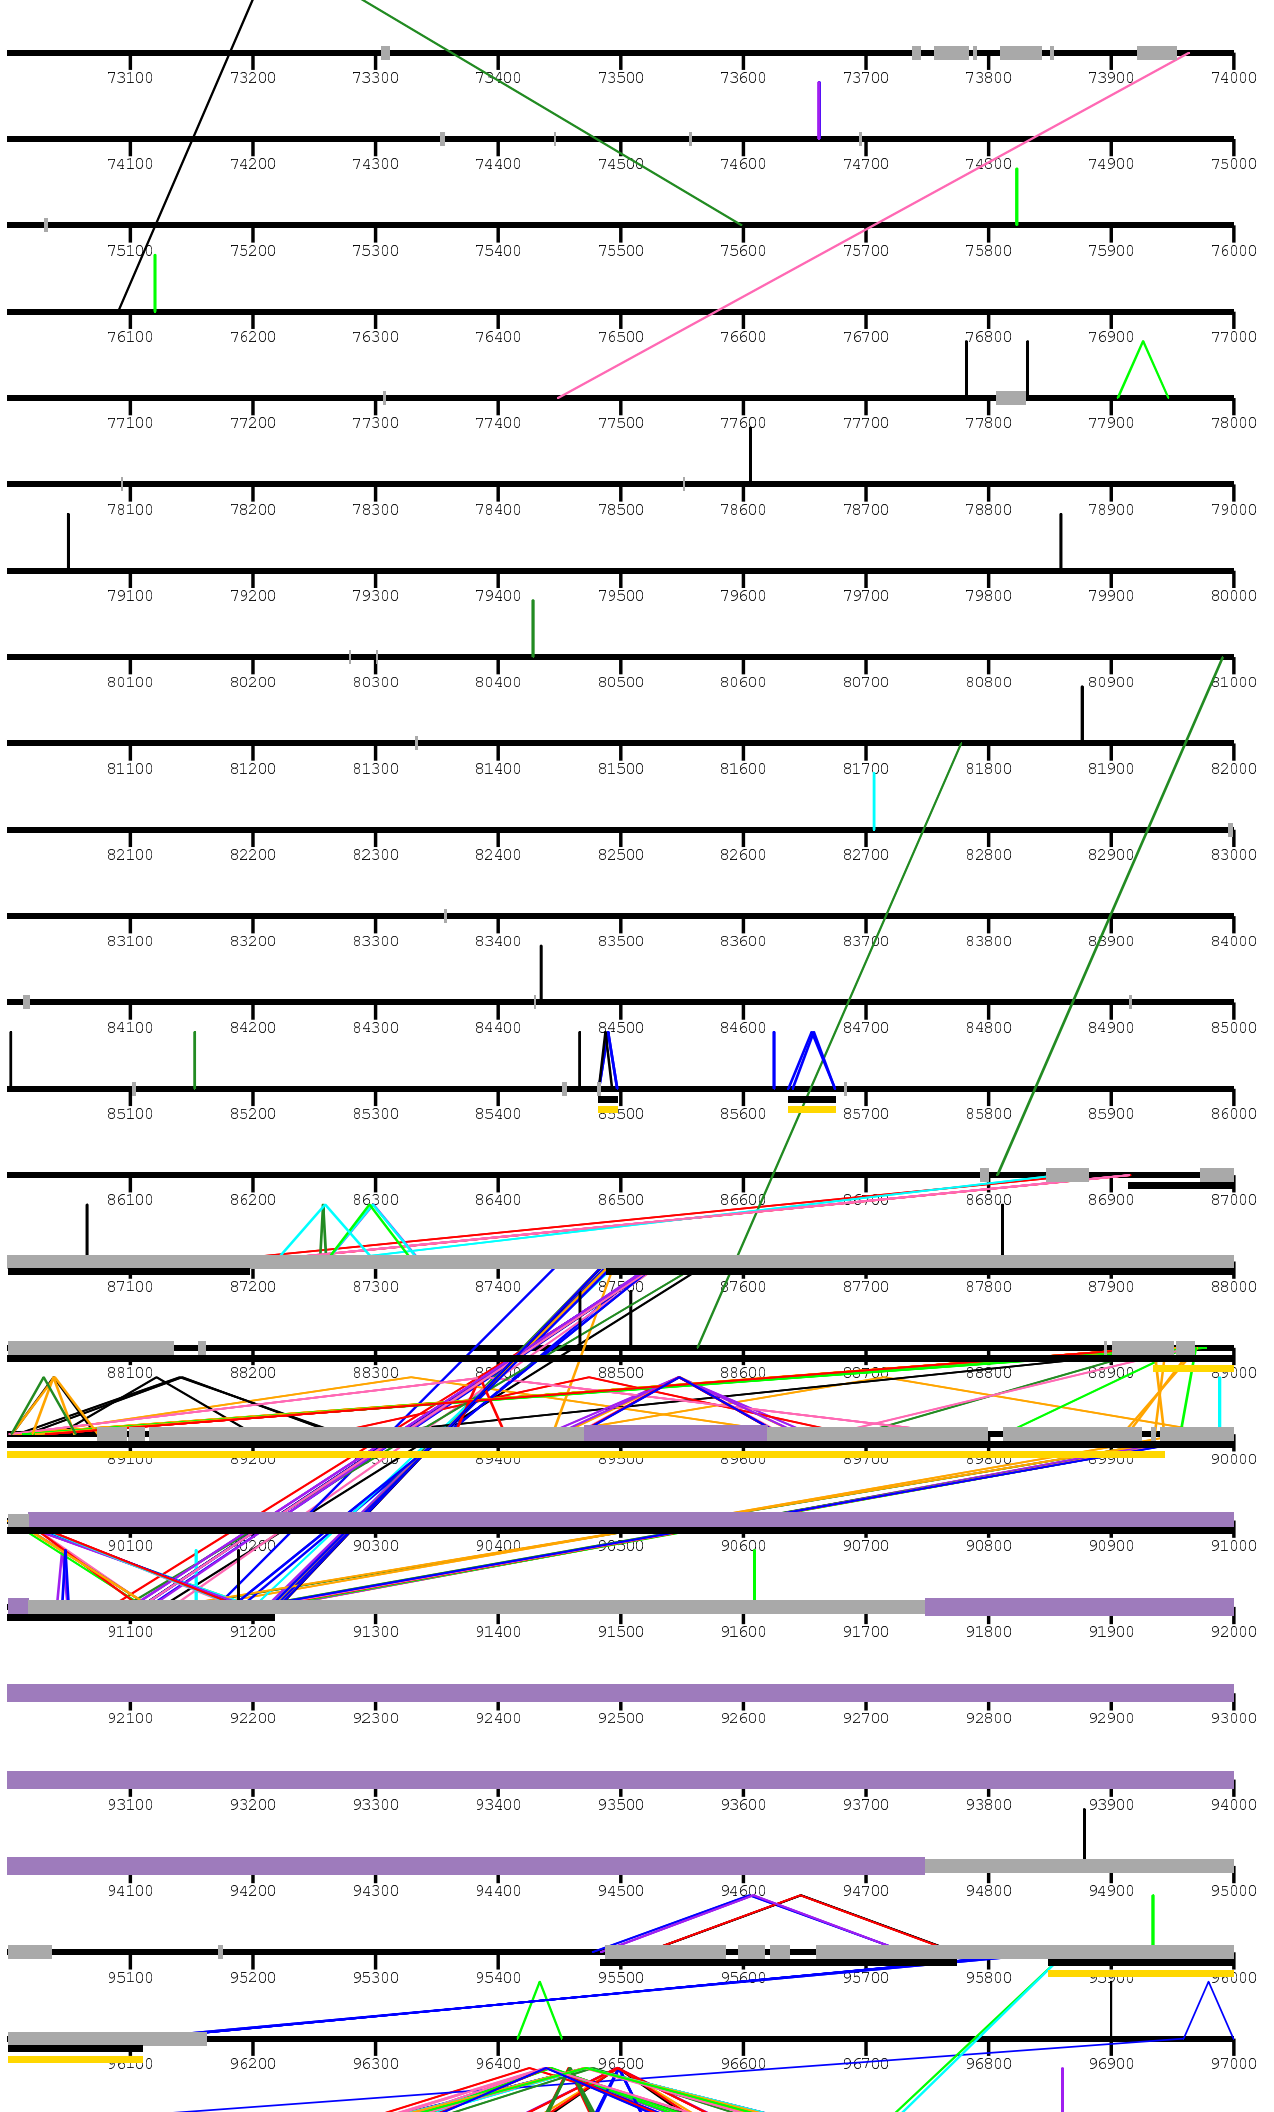

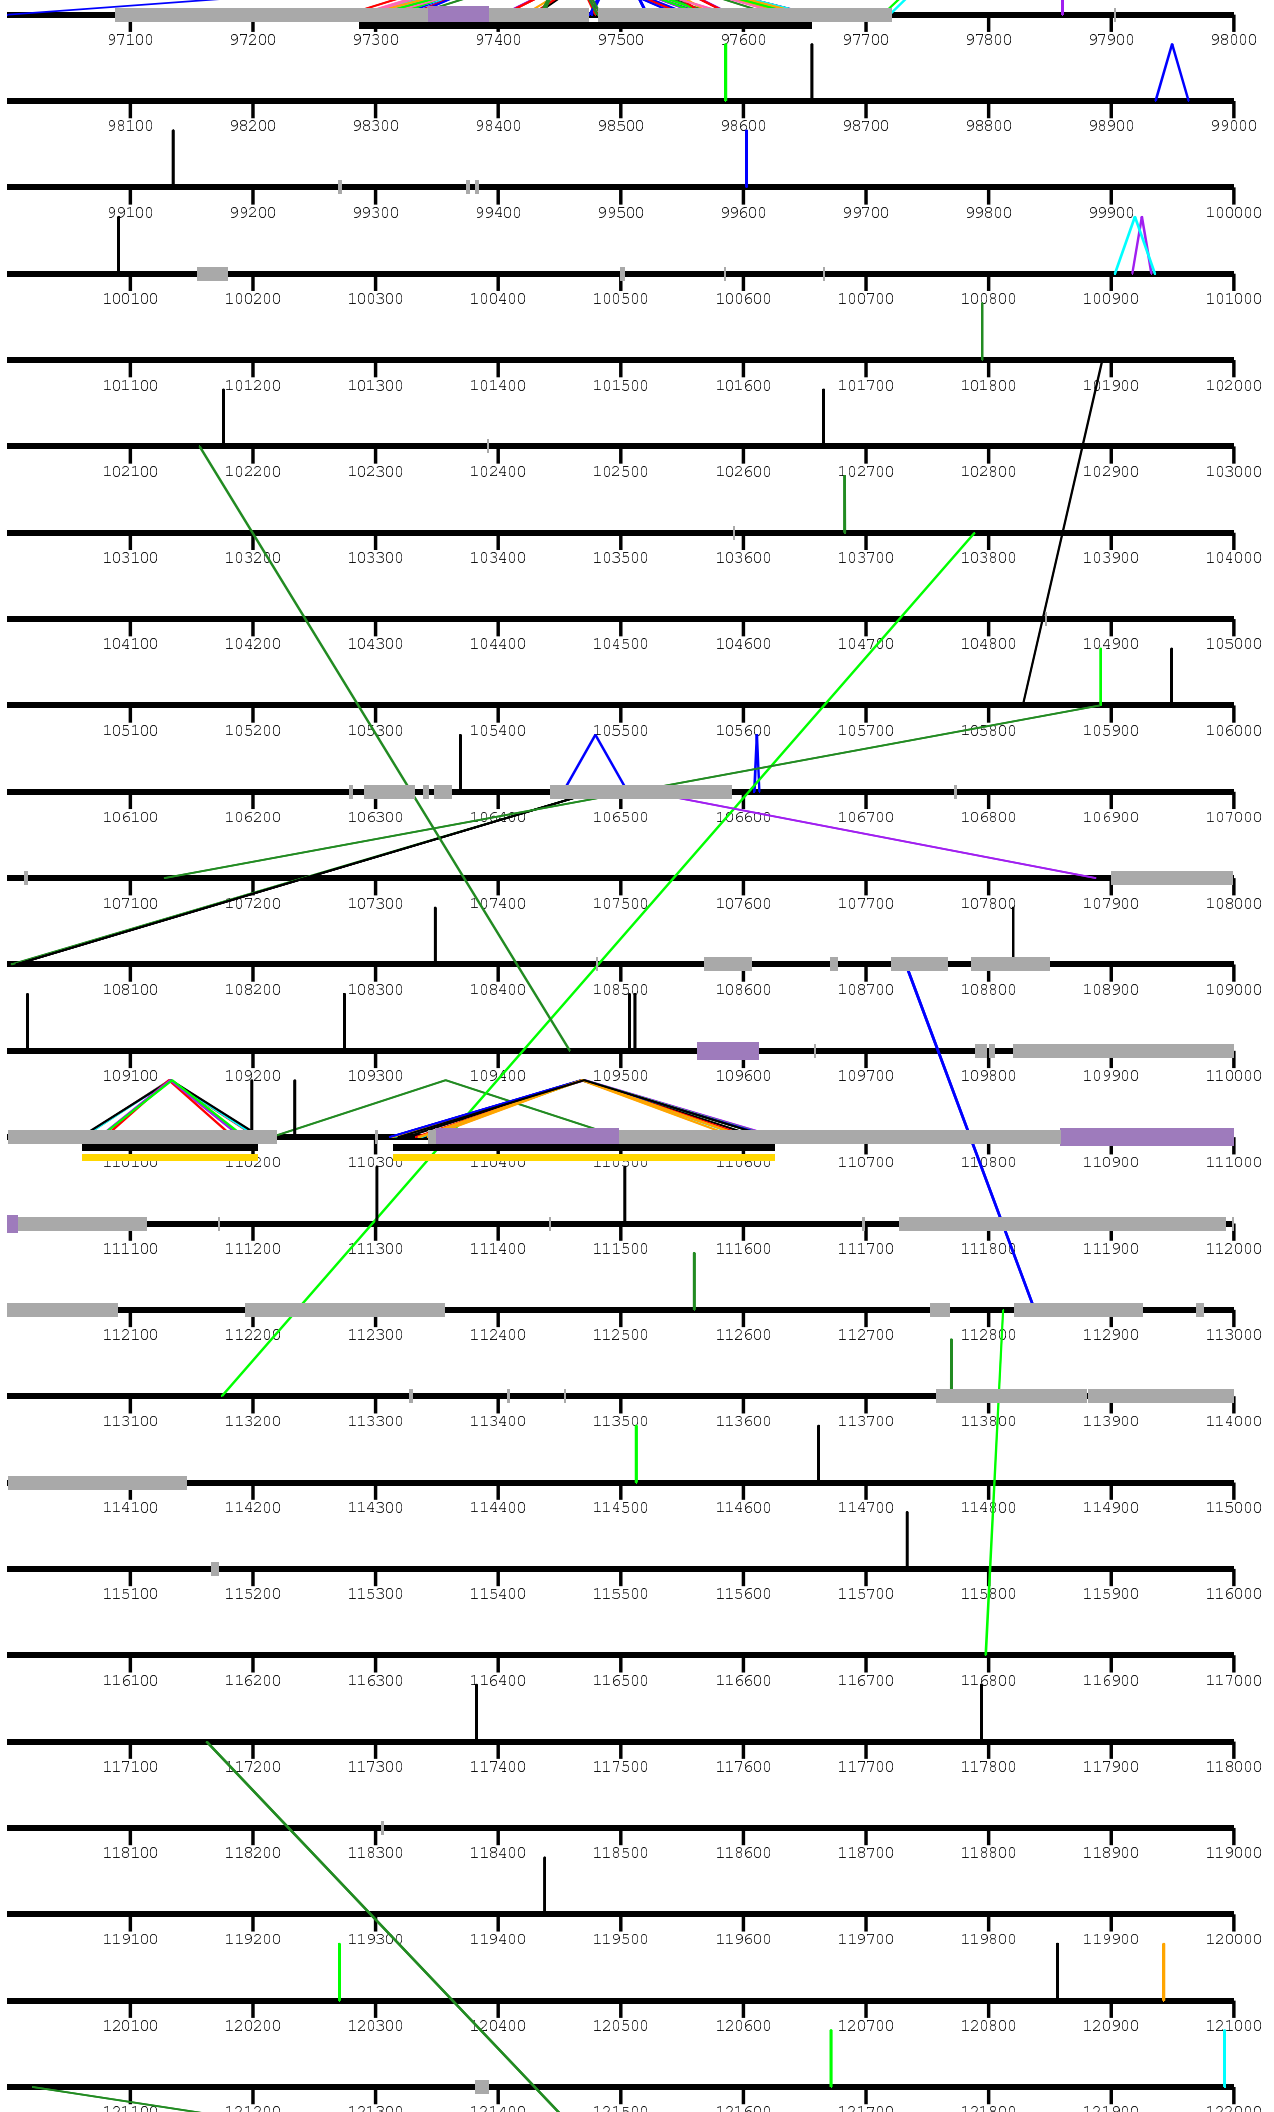

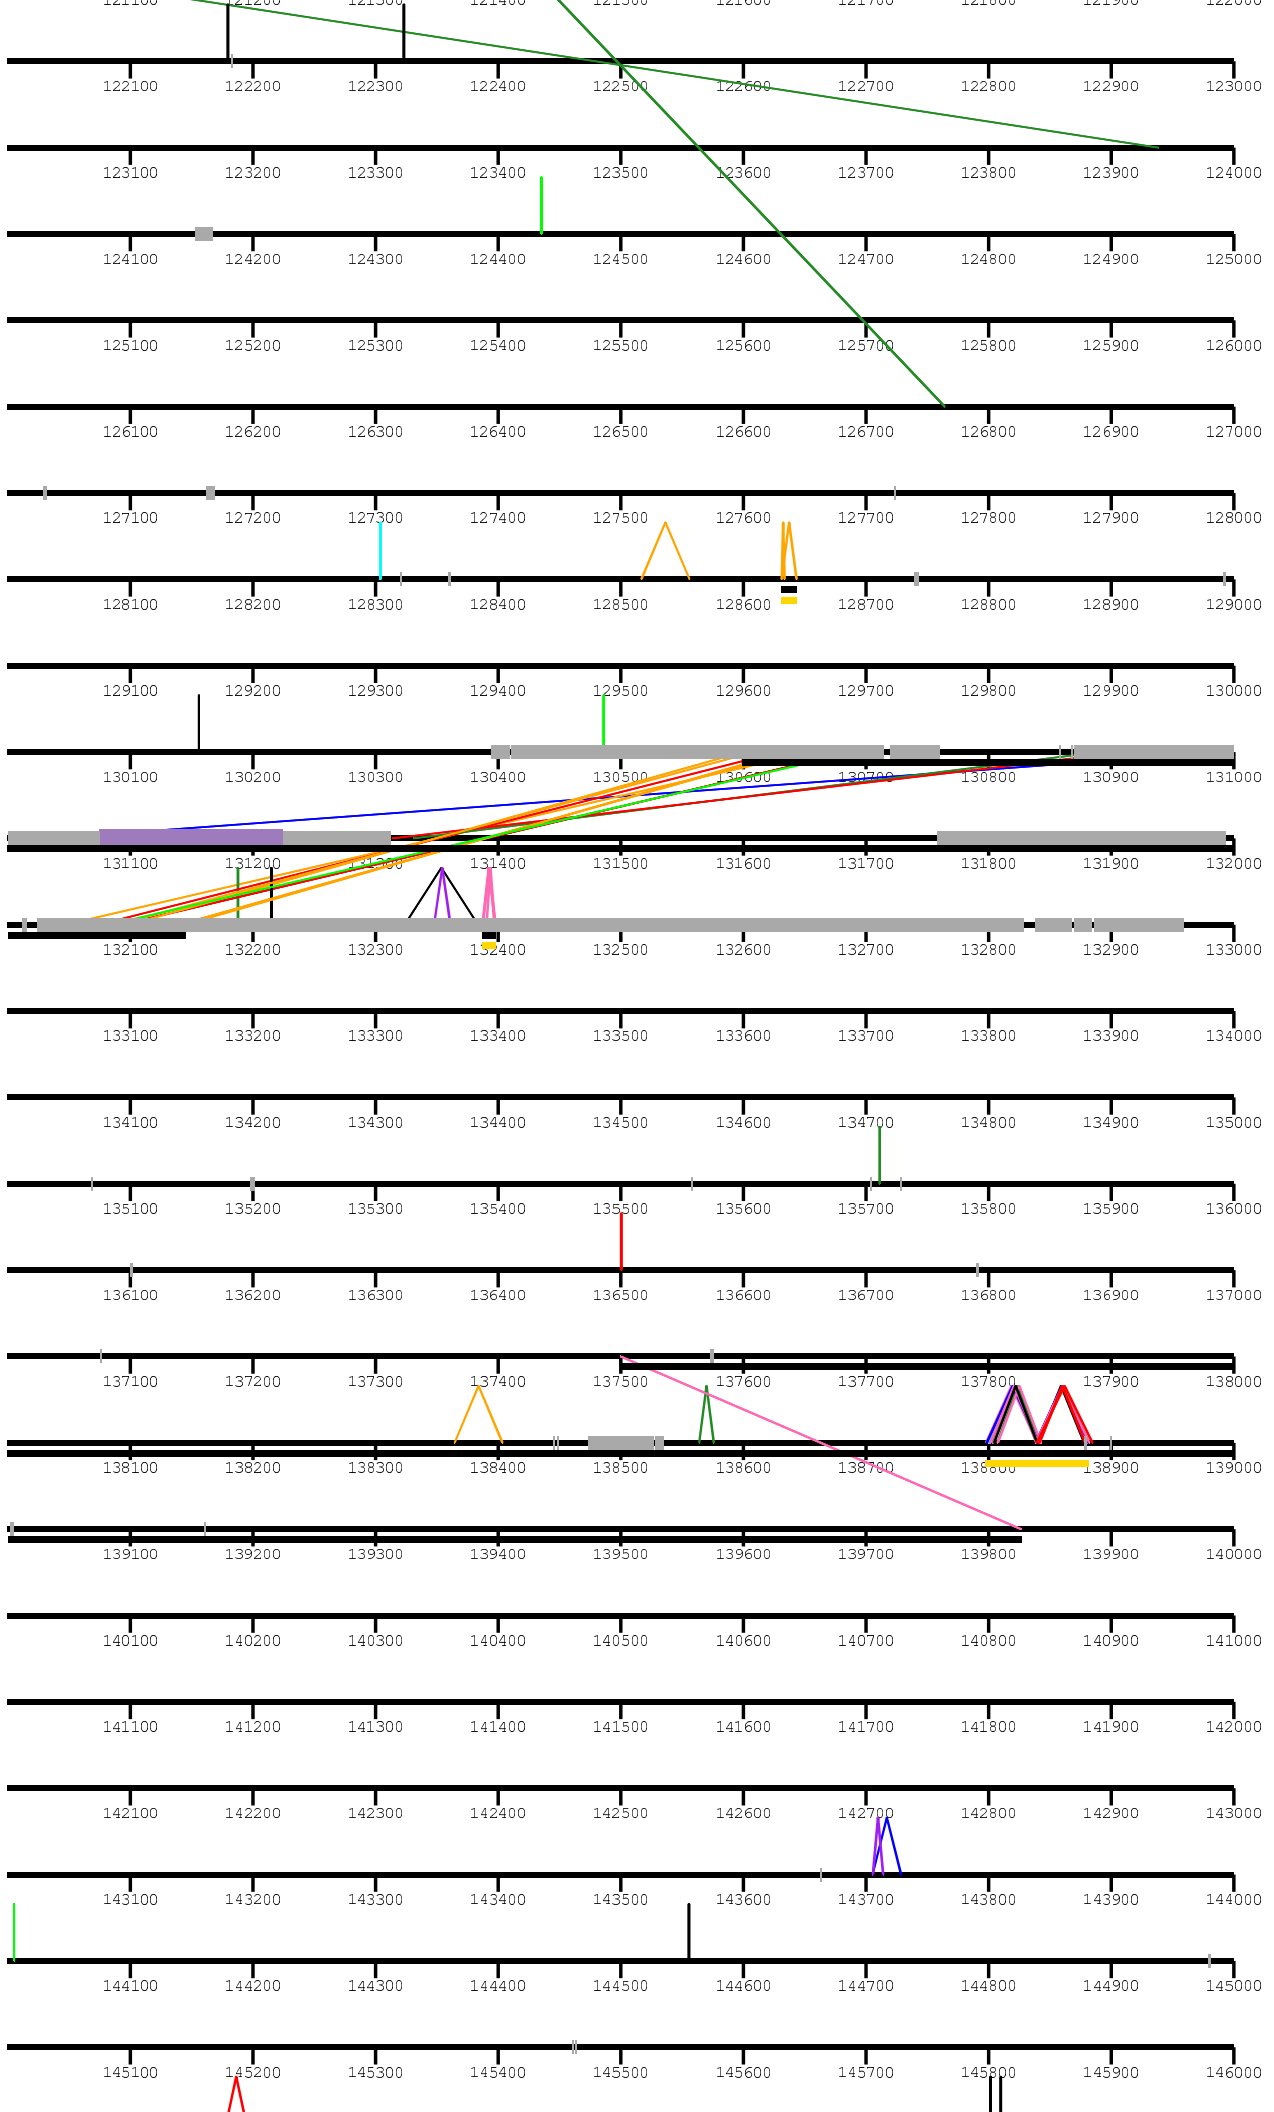



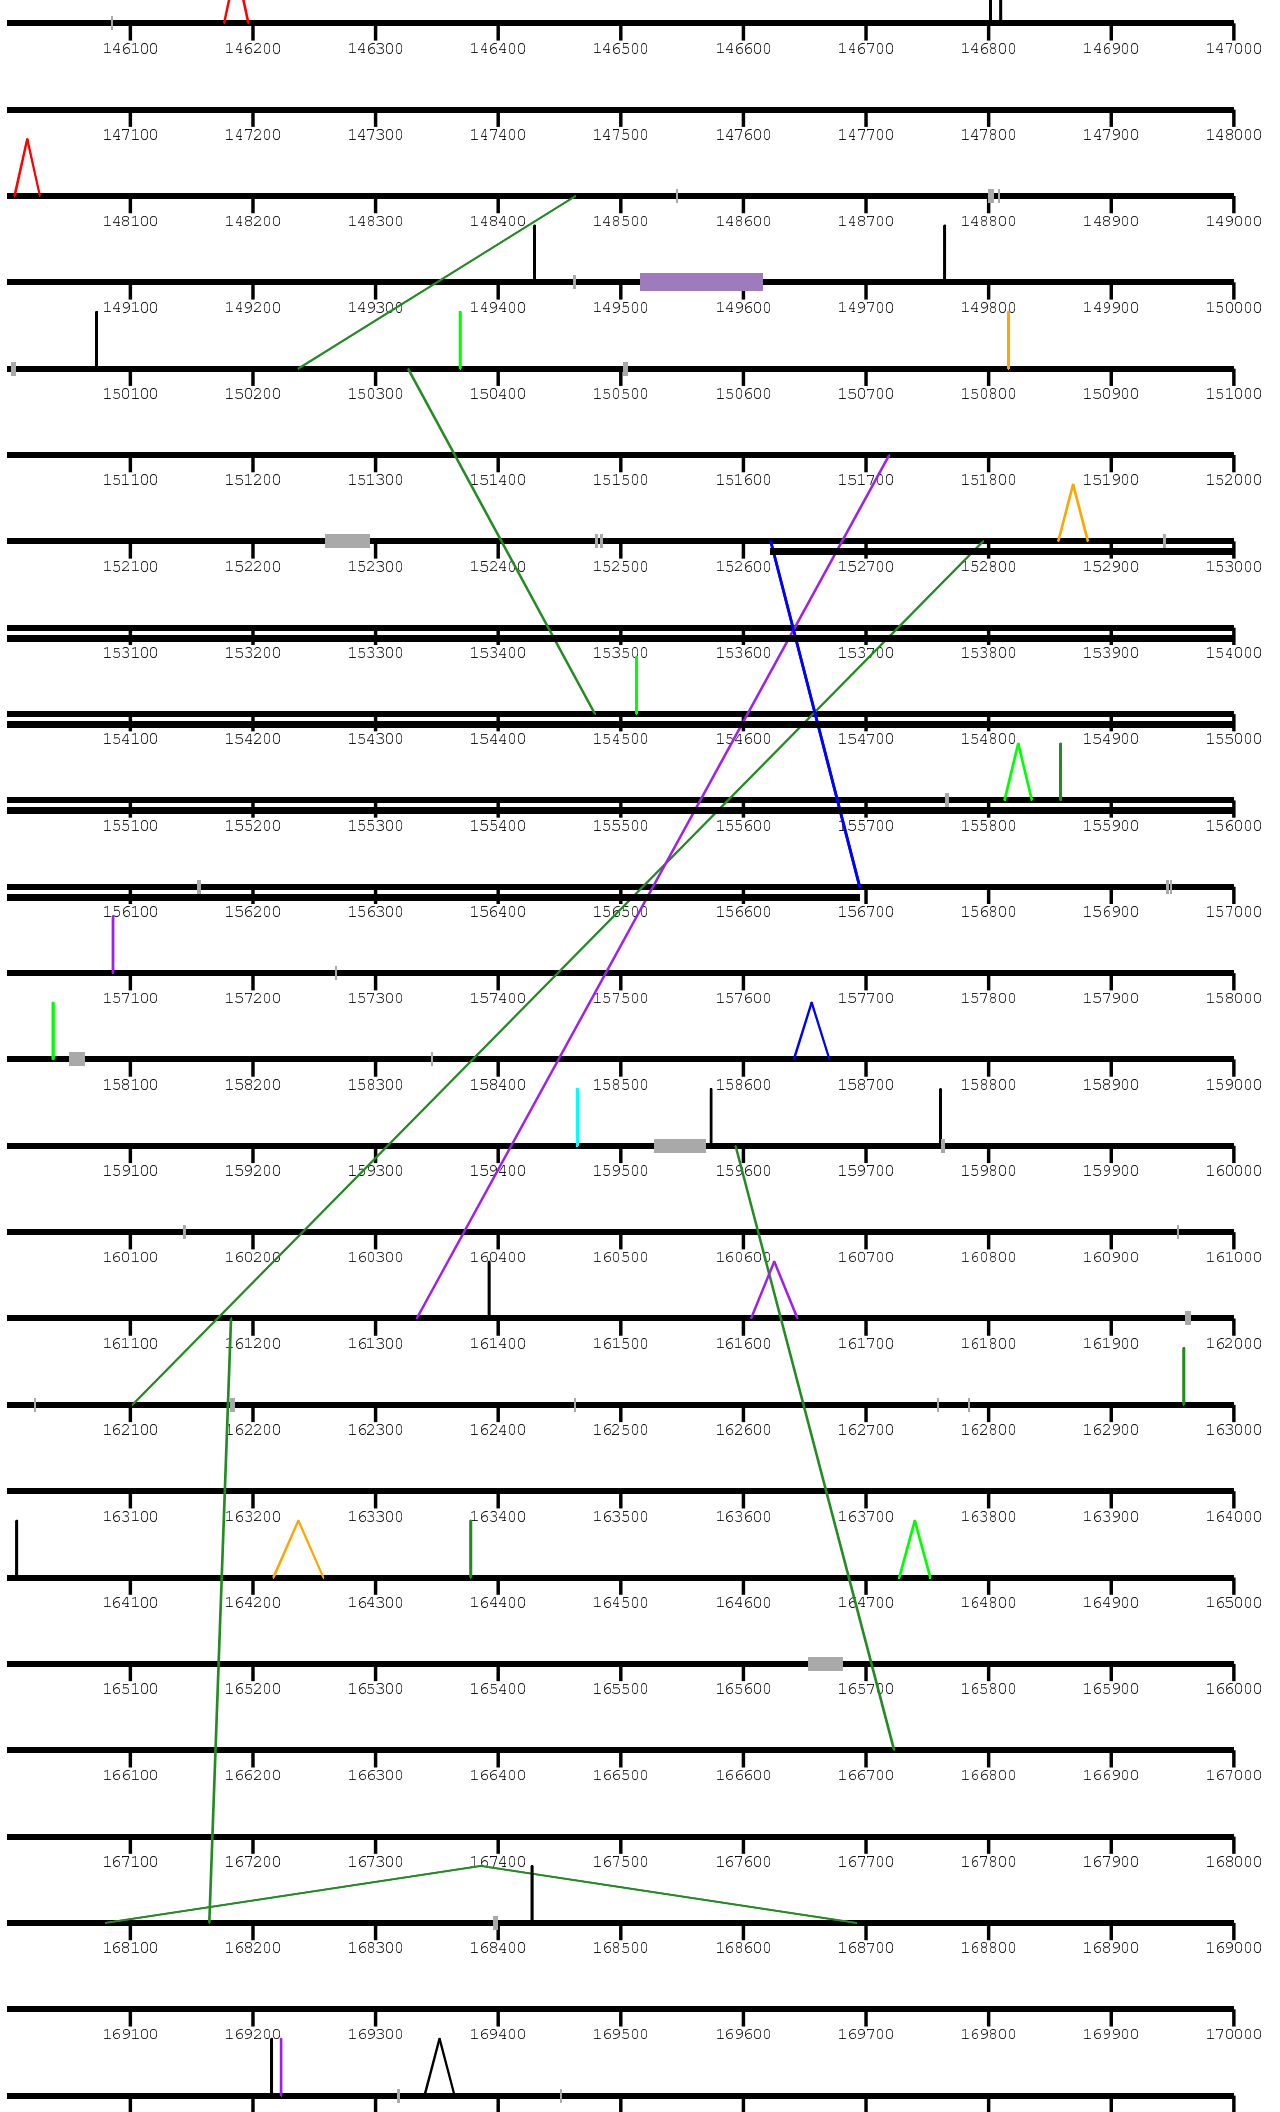

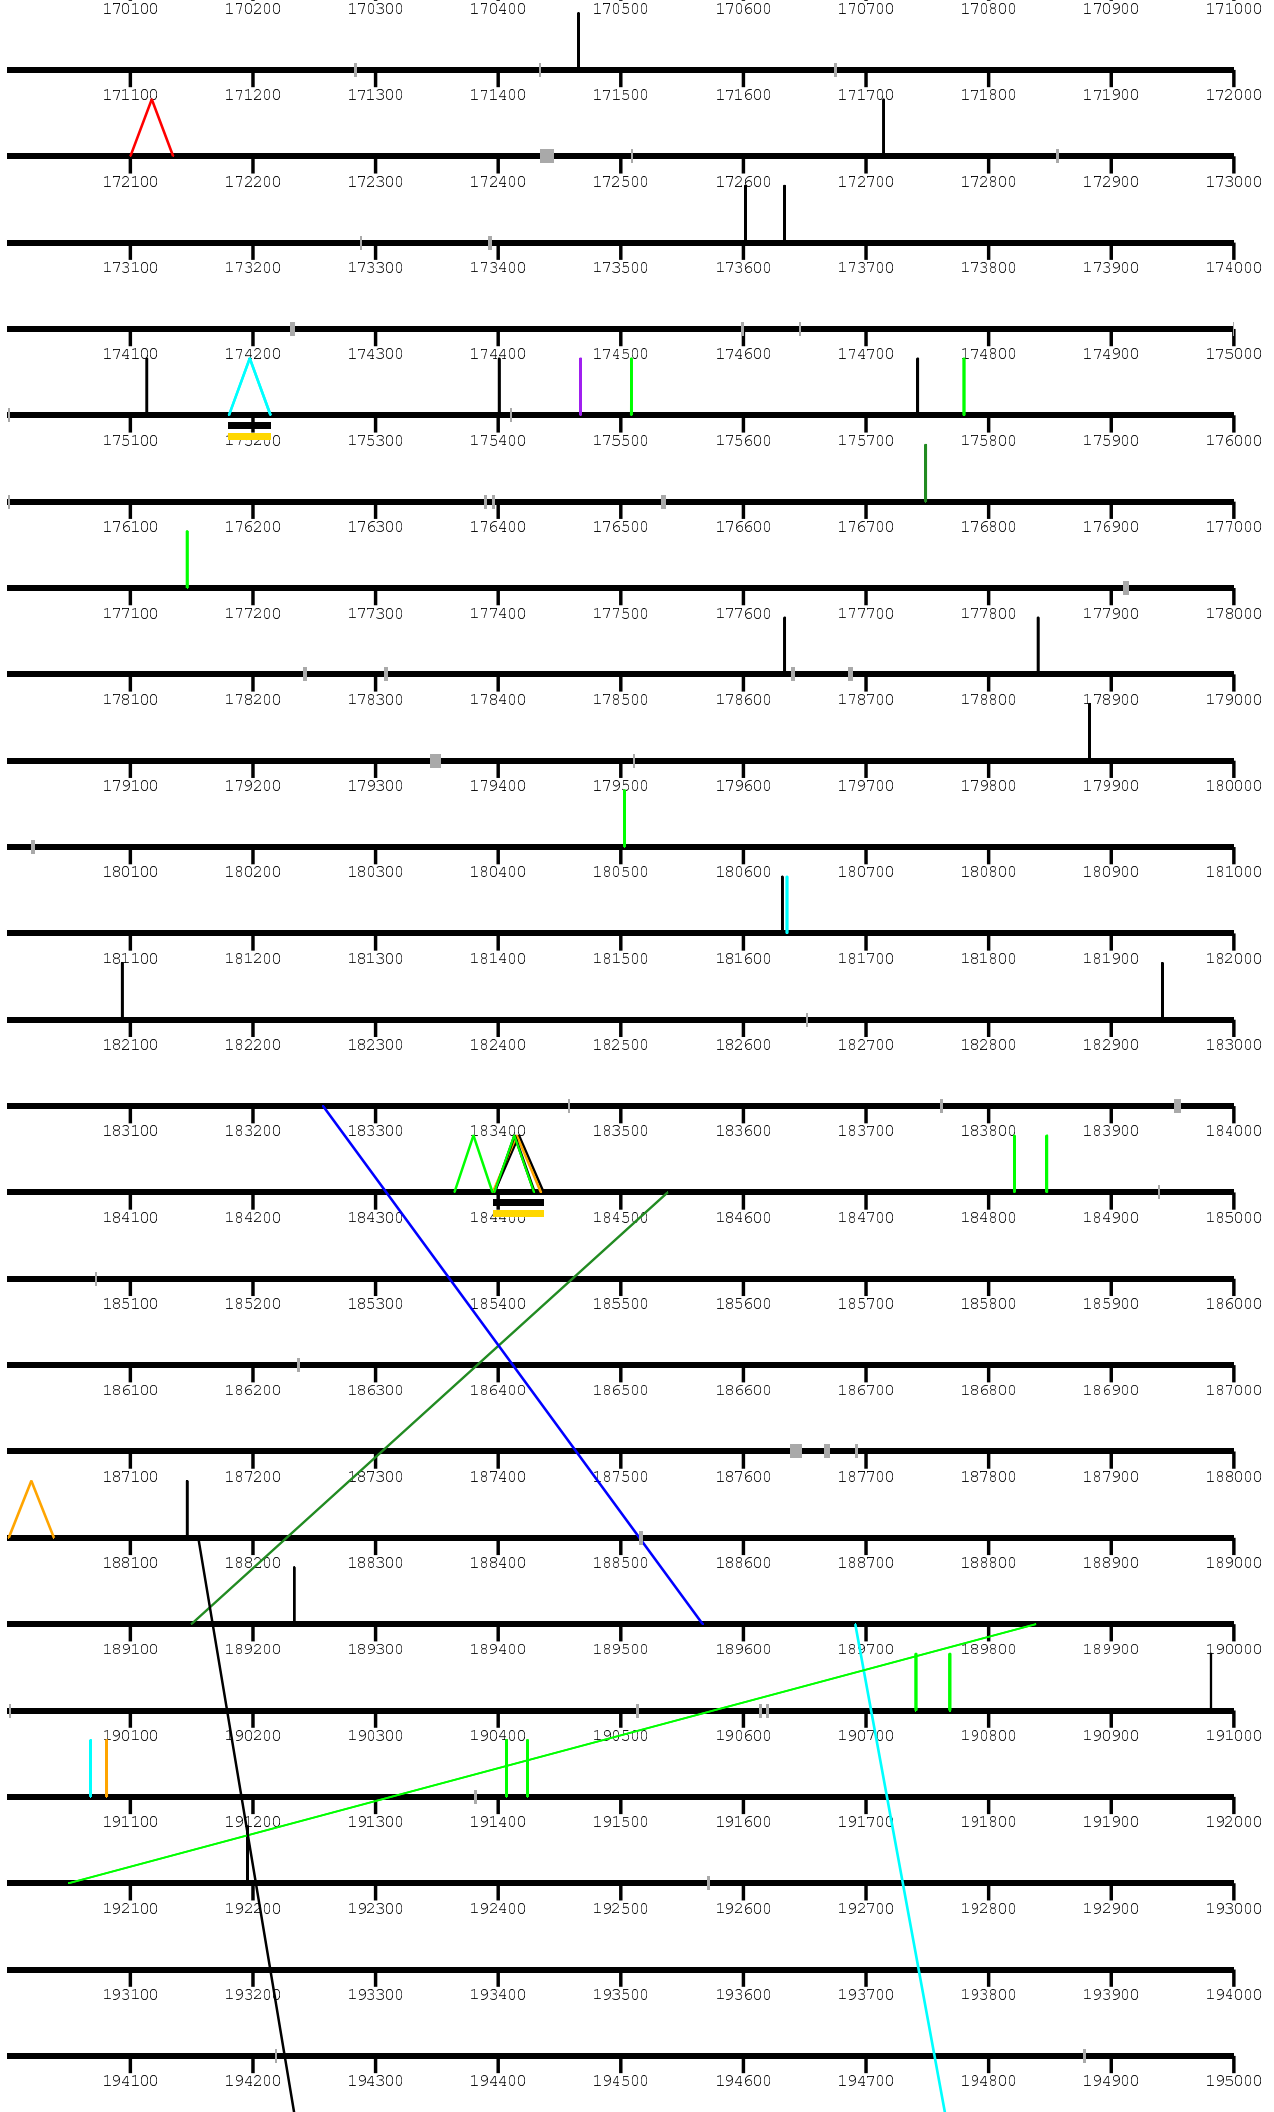

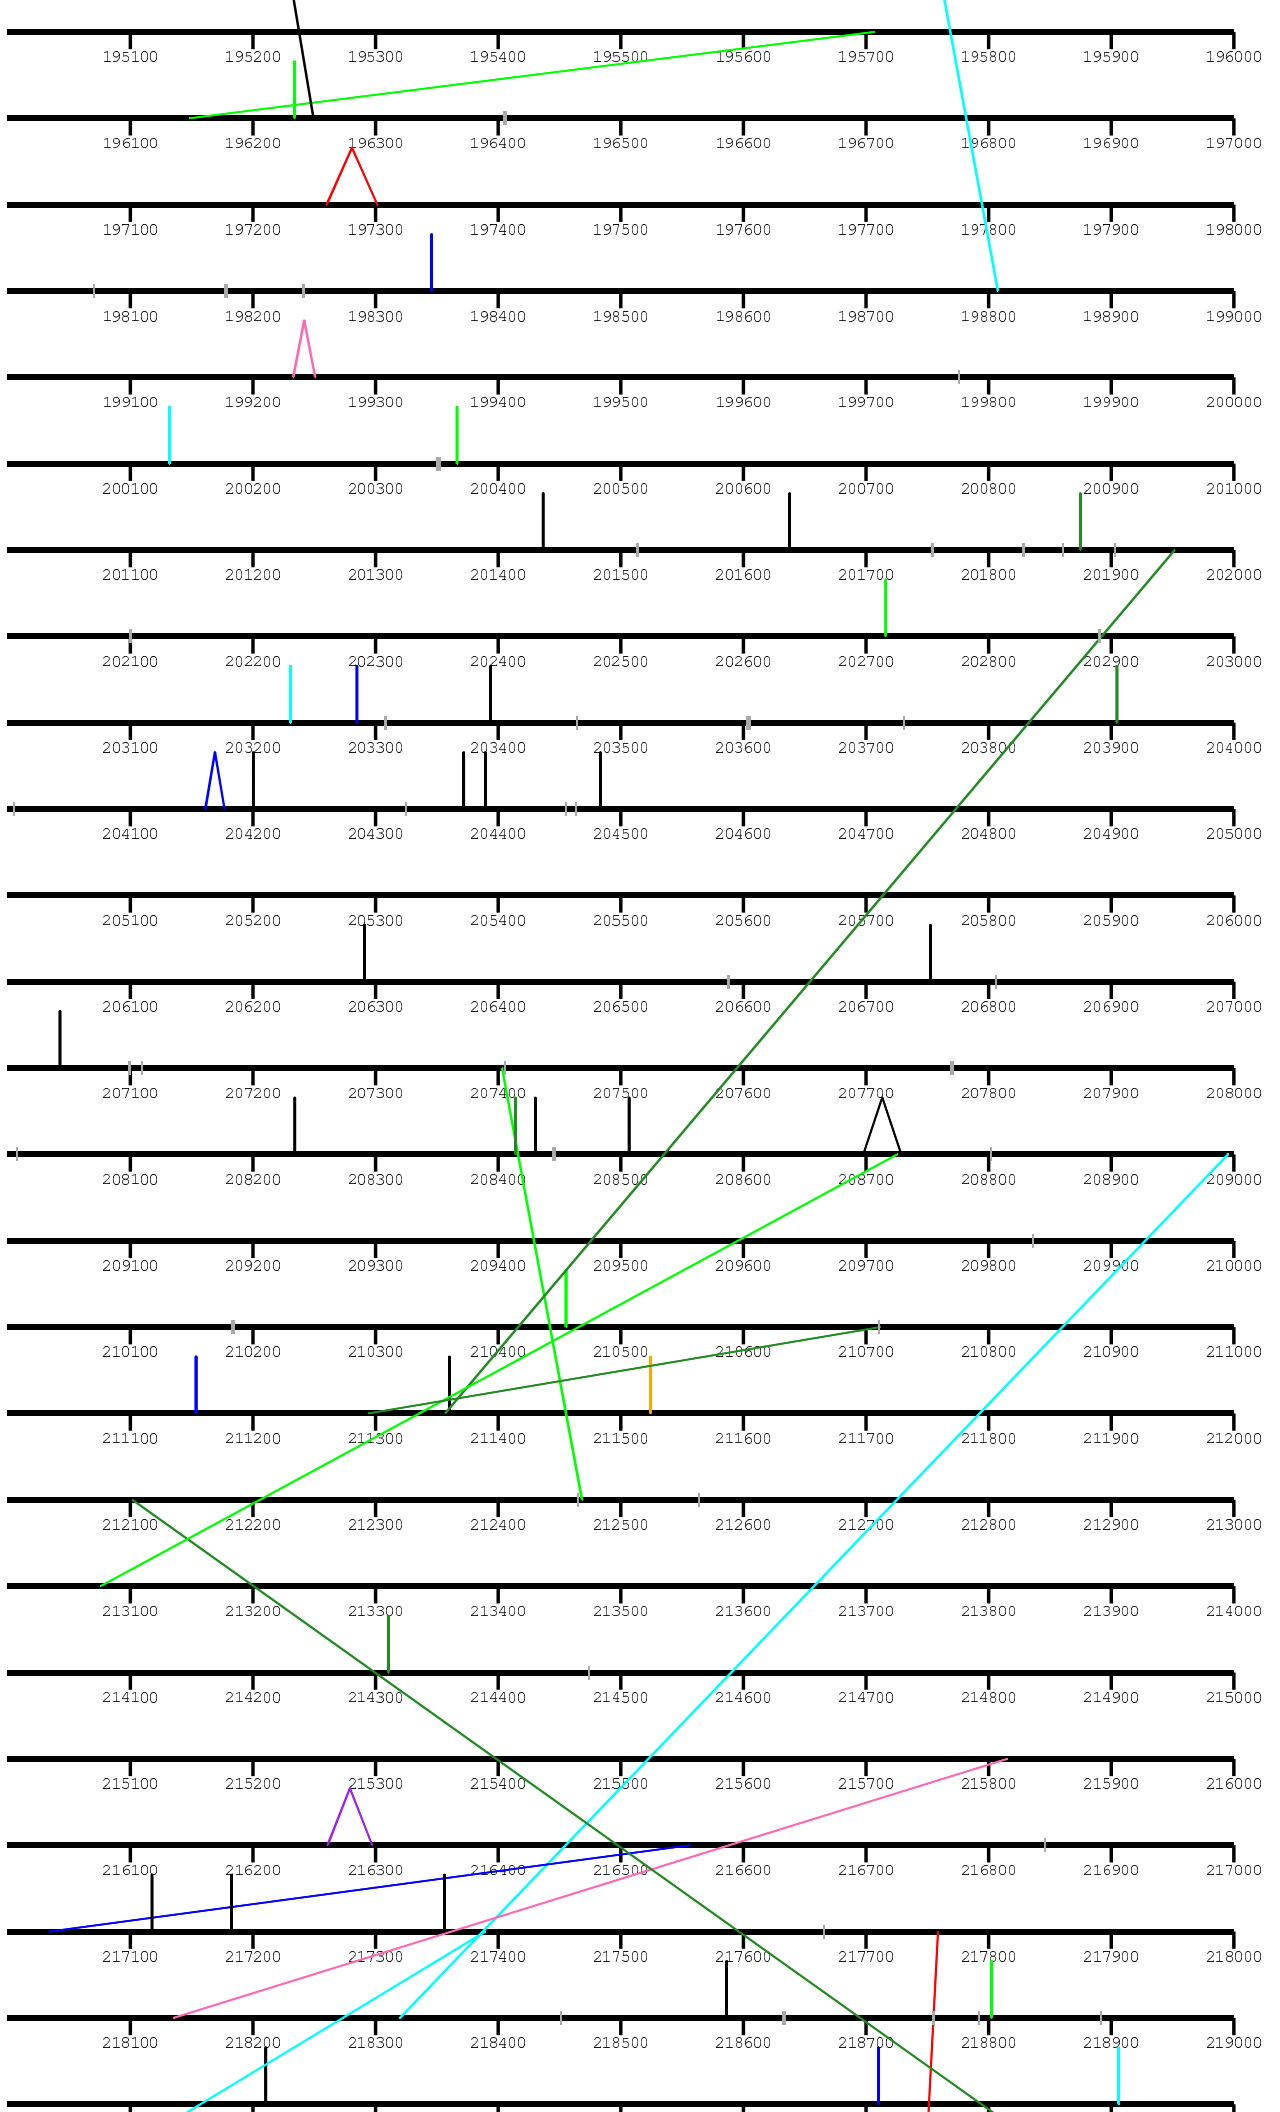

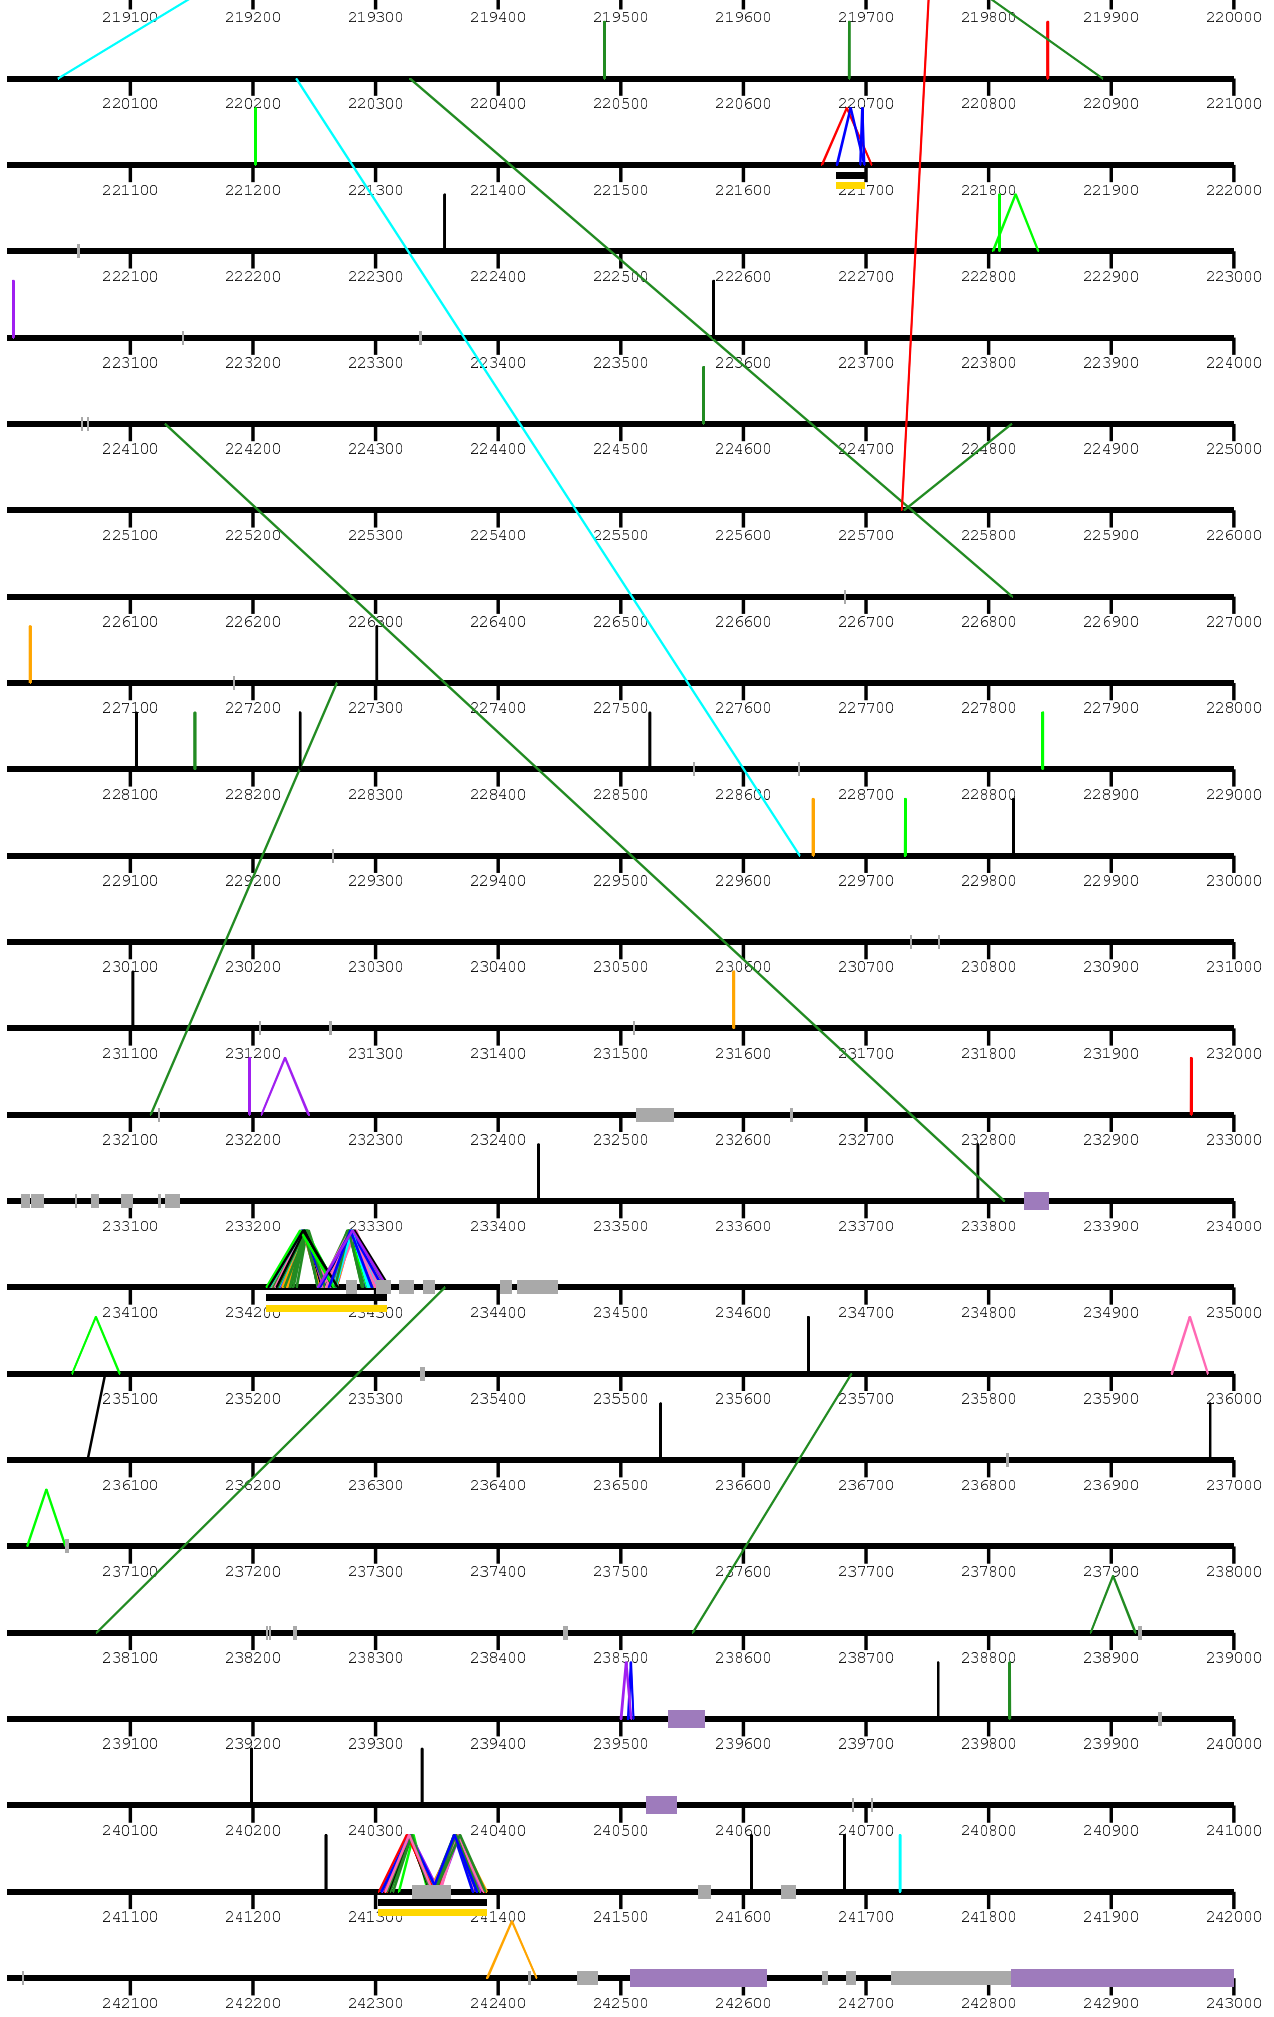

chr3

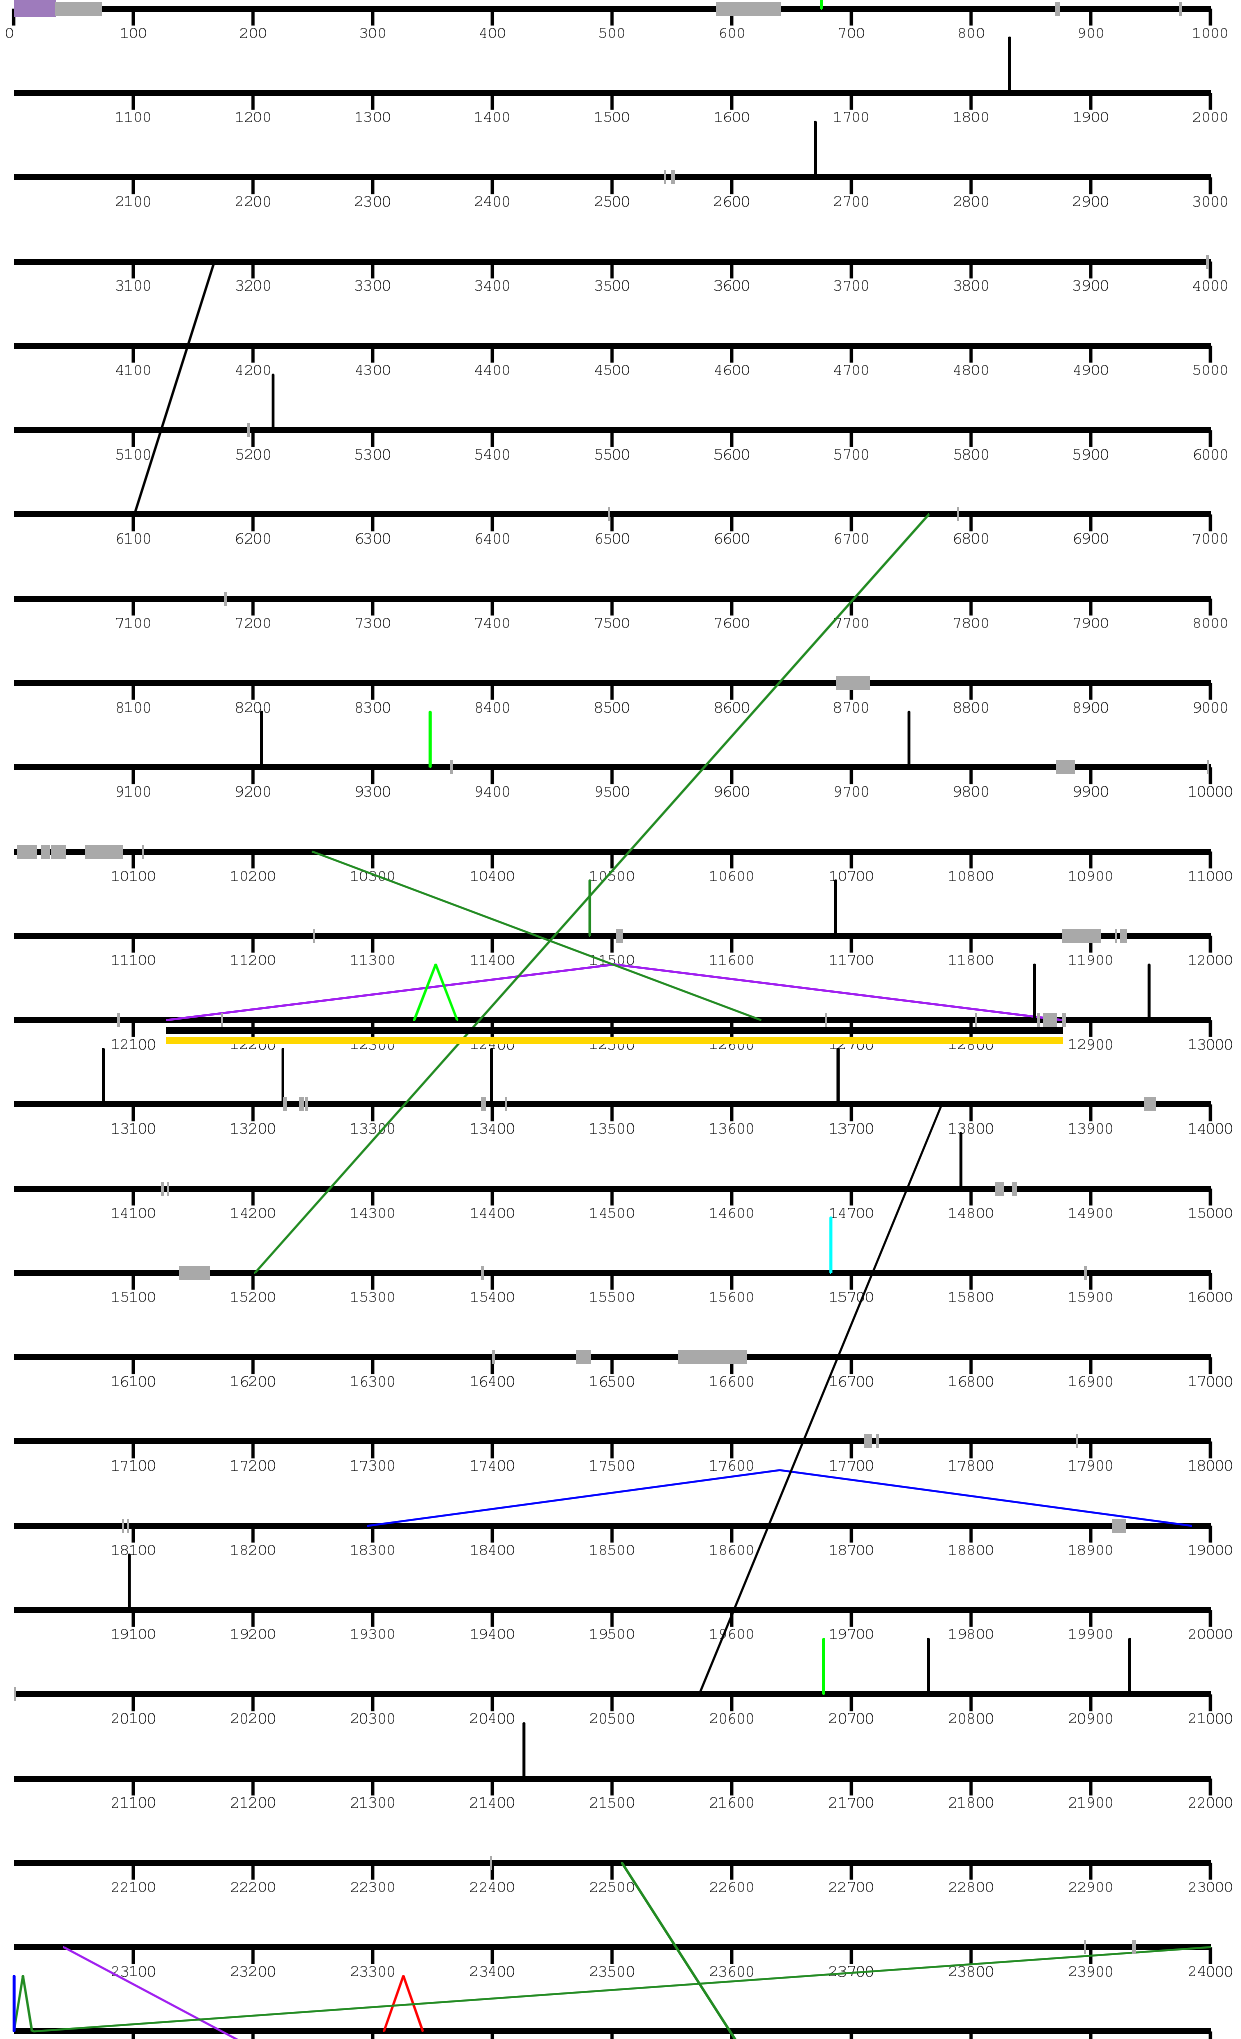

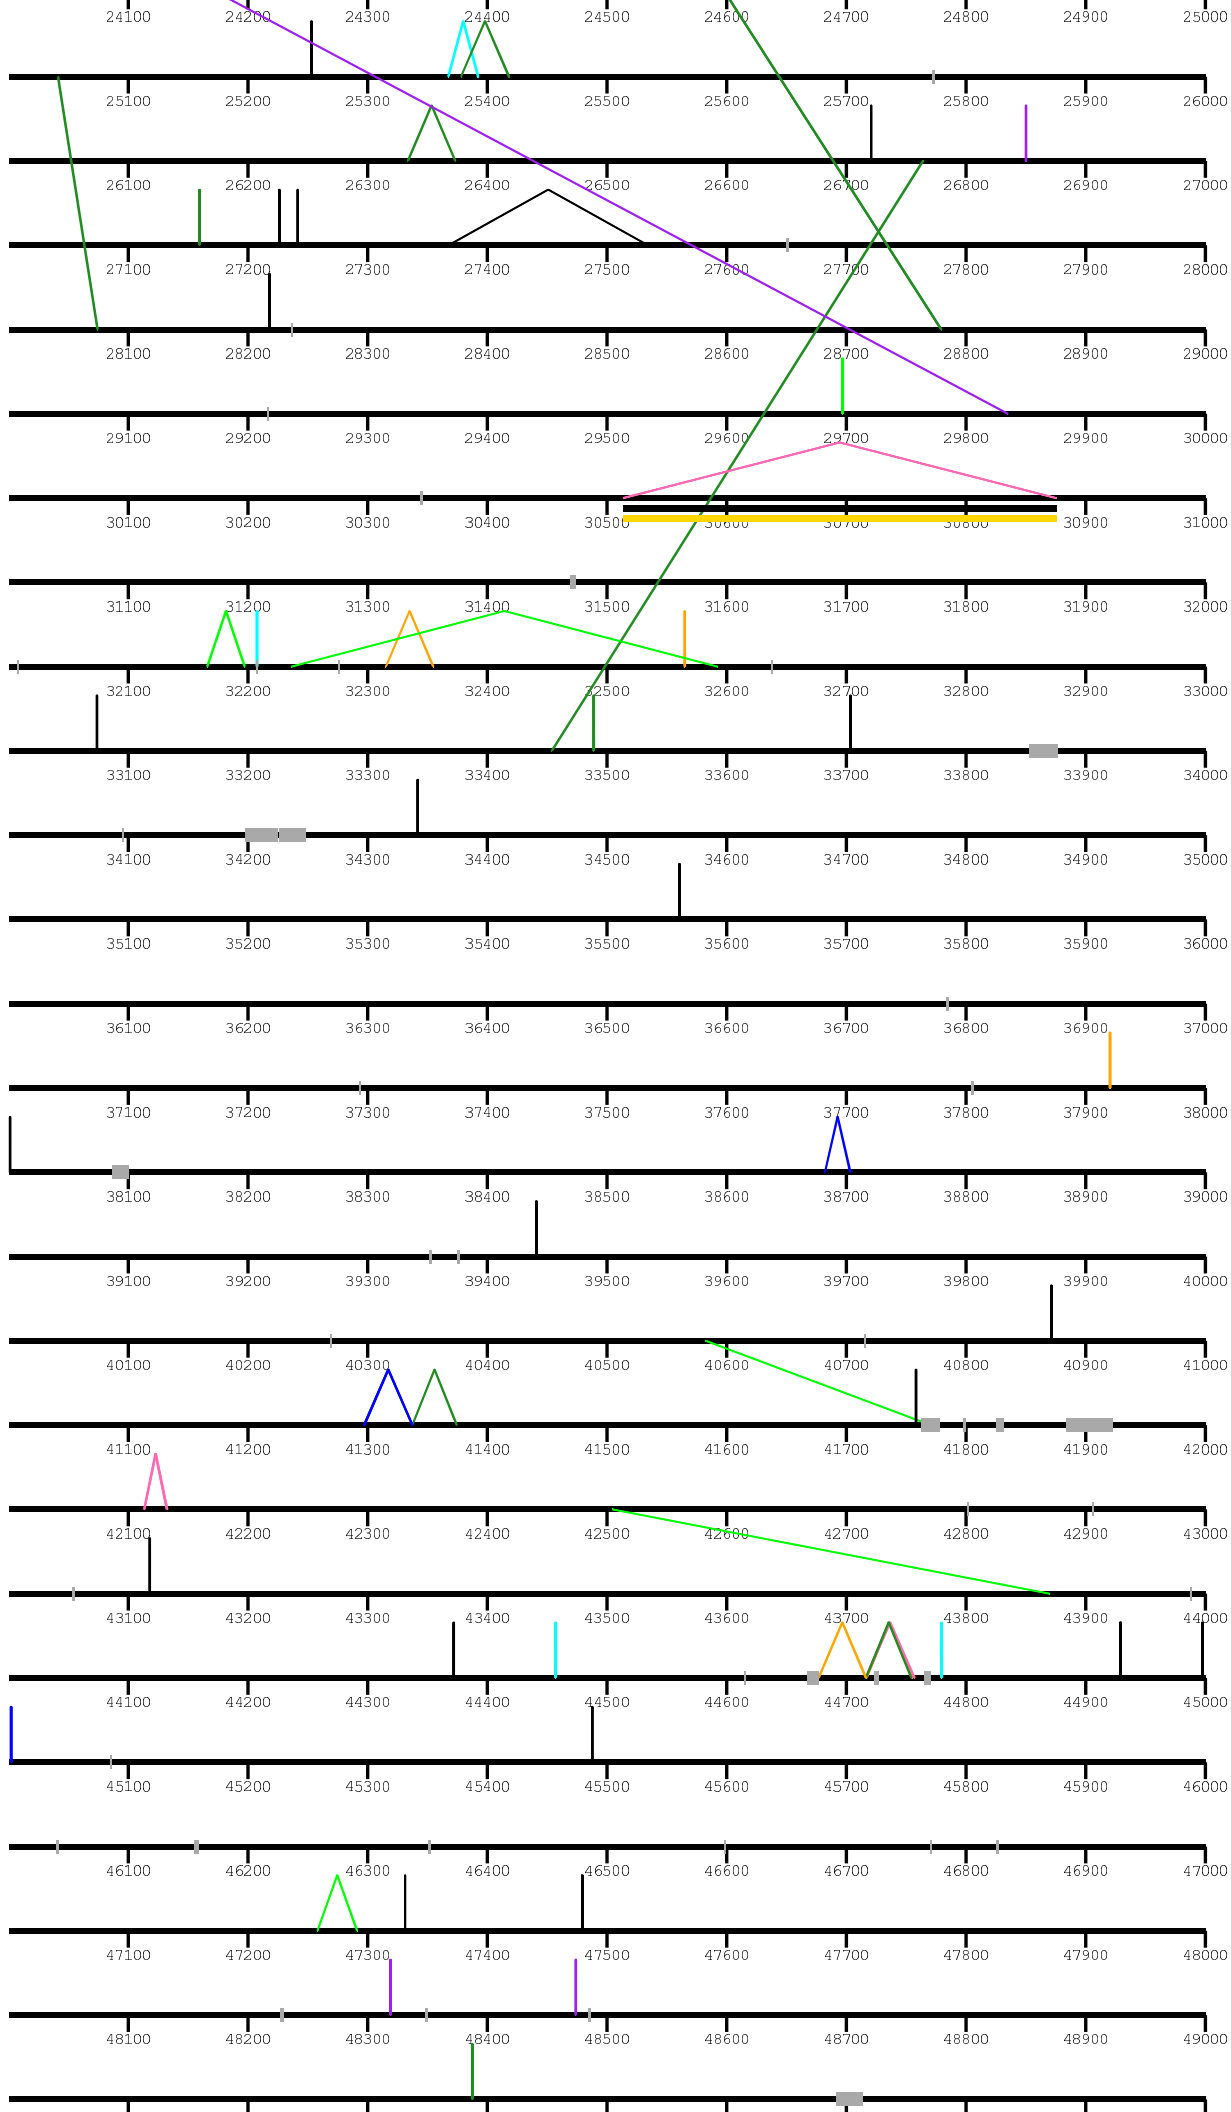

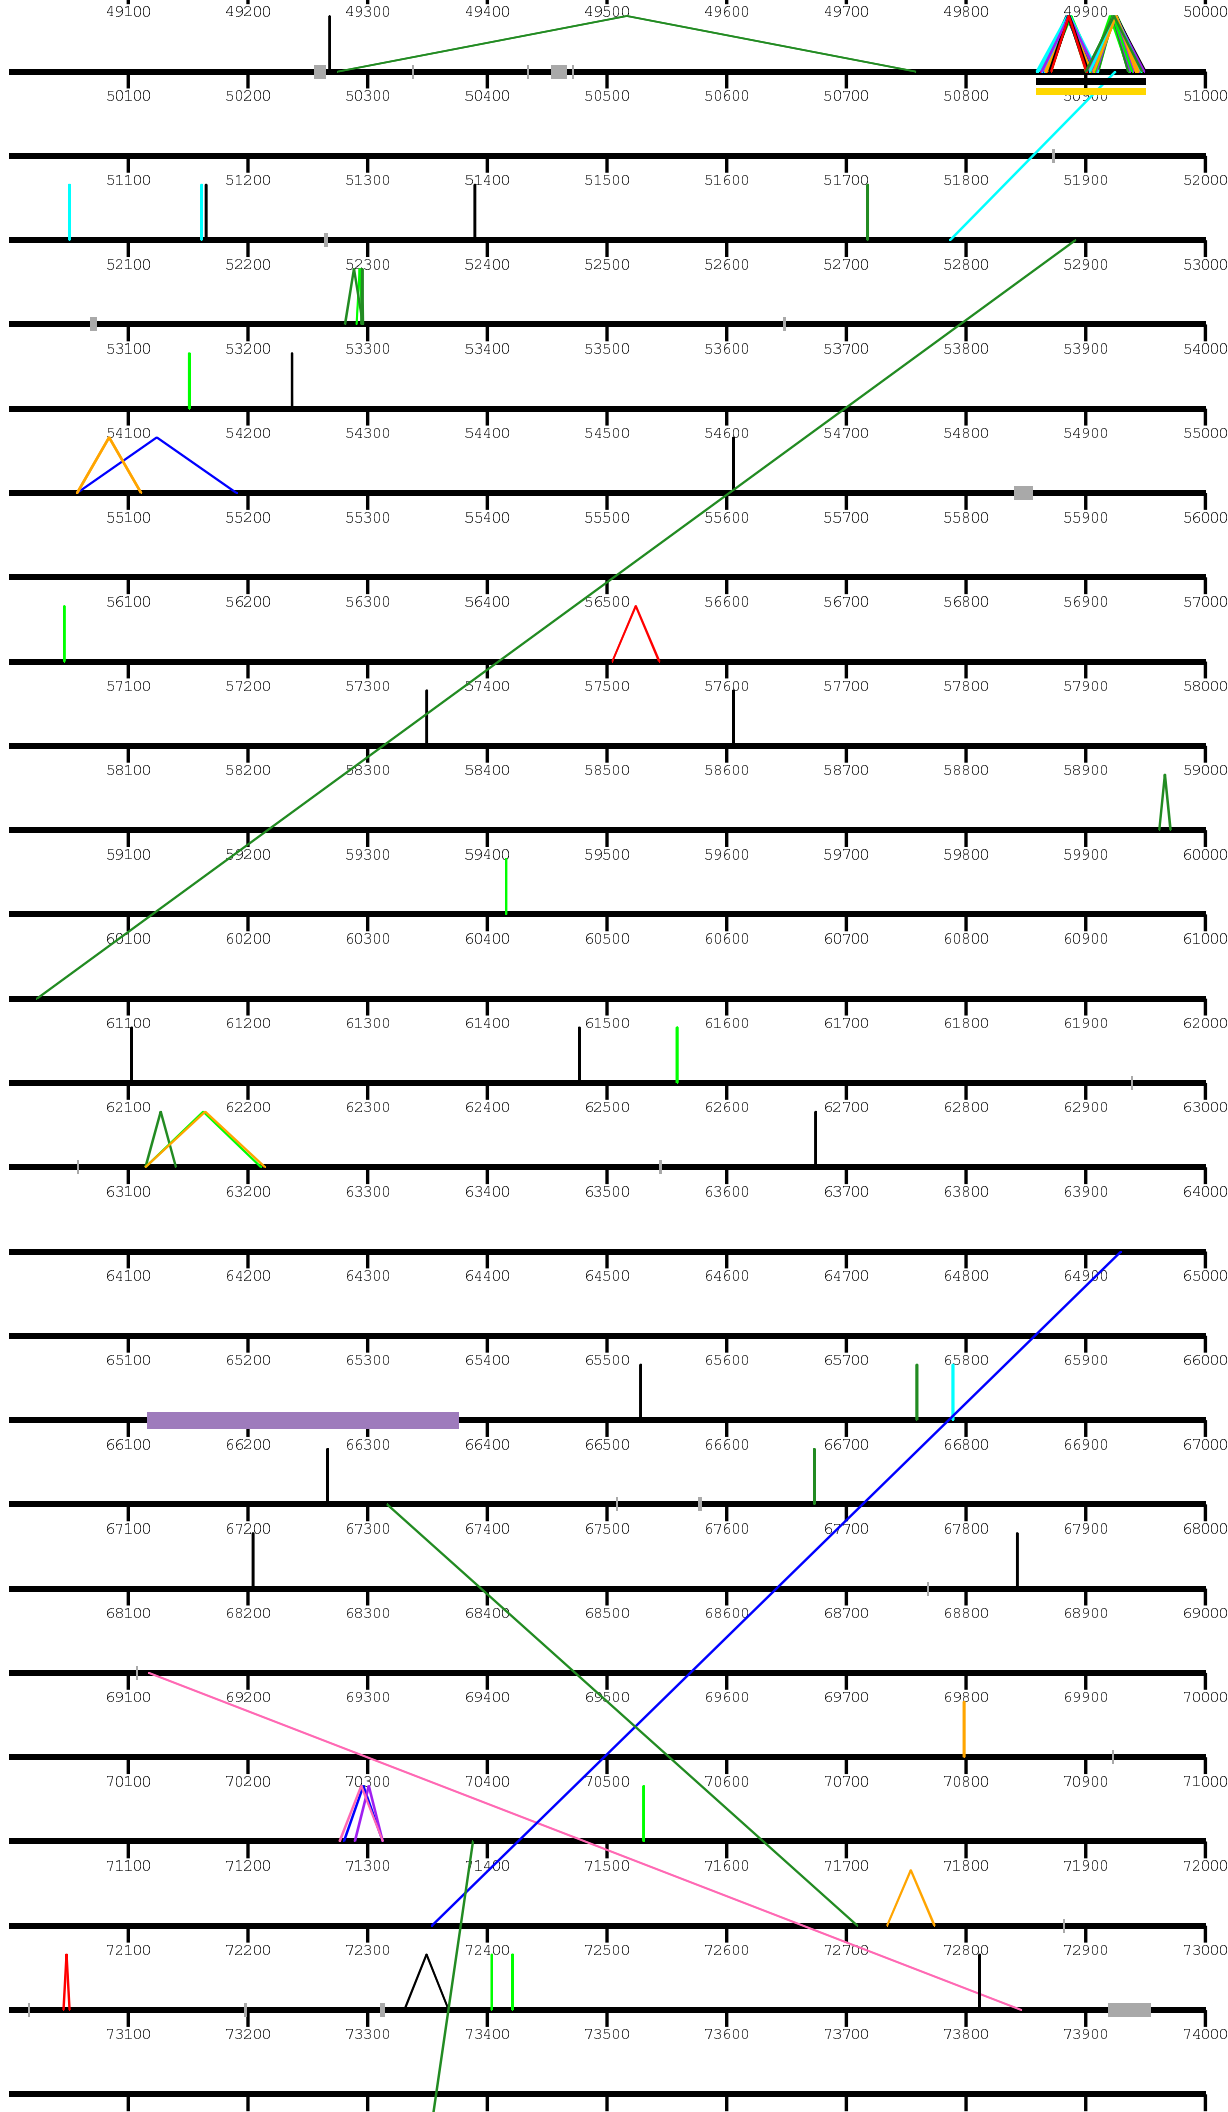

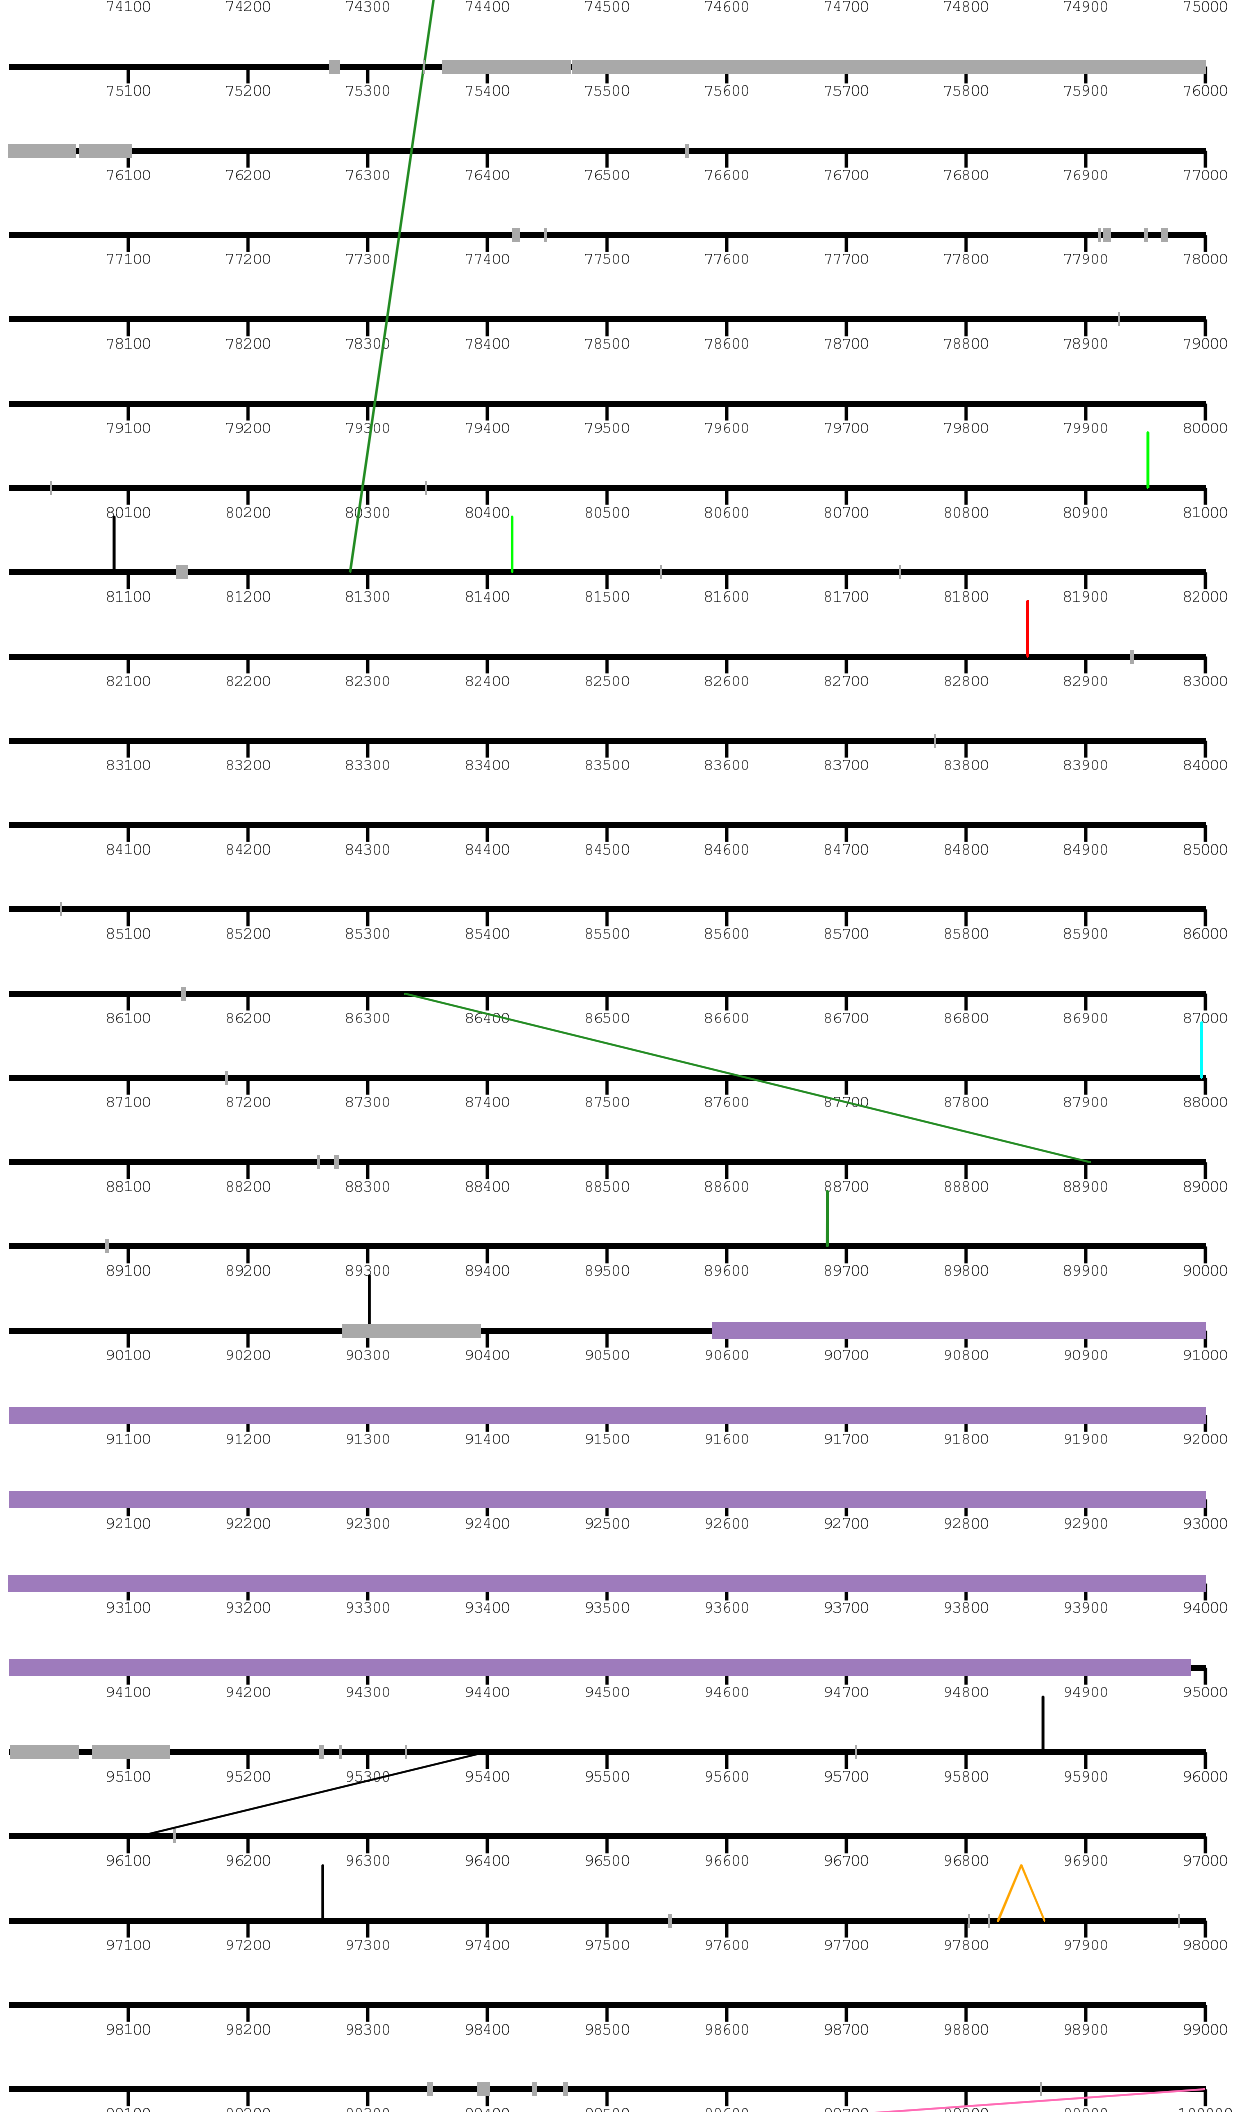



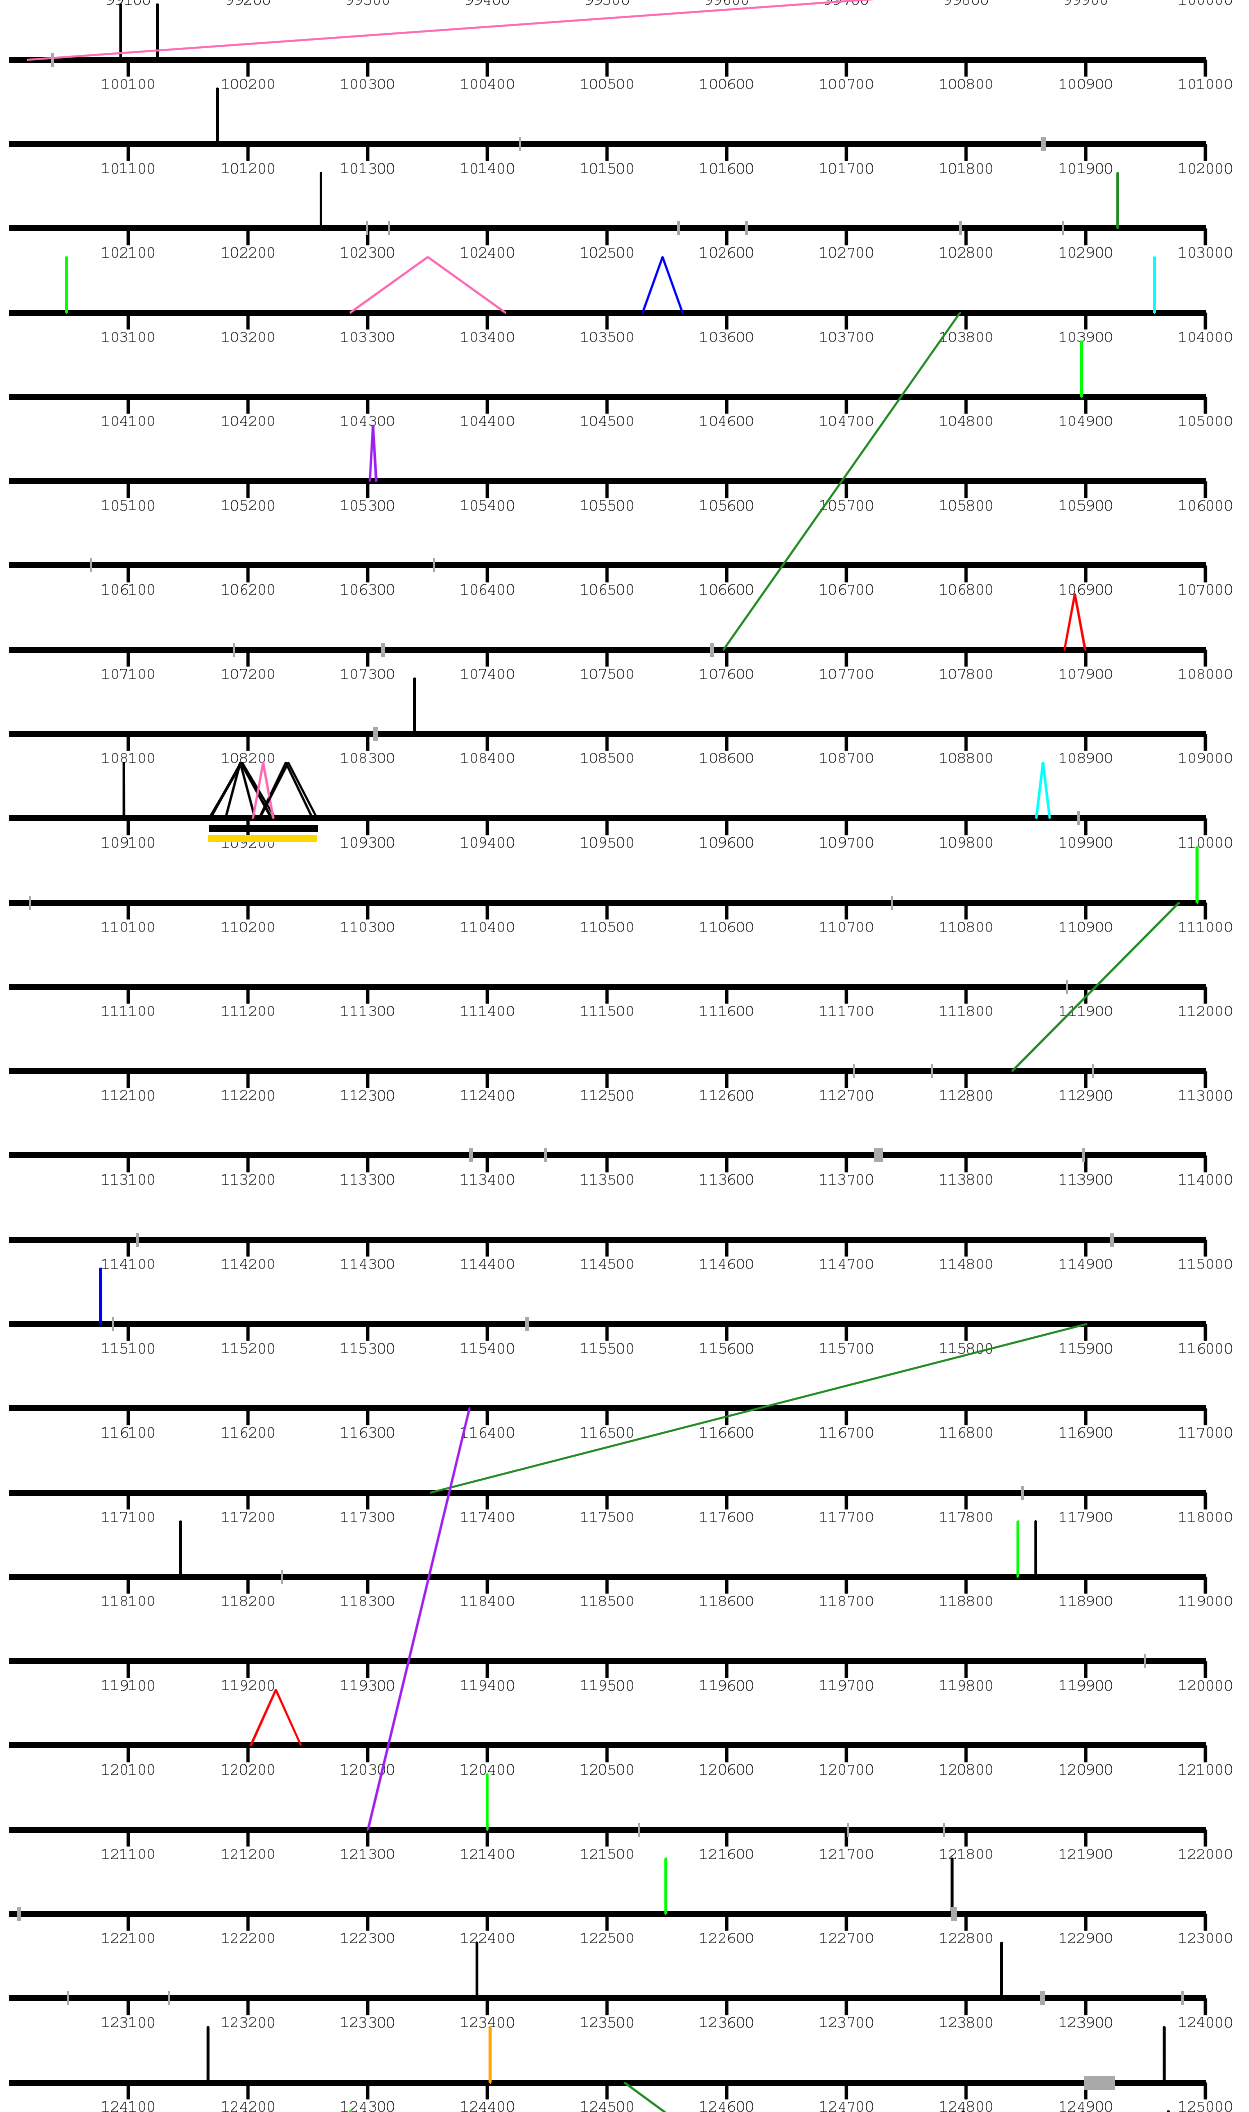

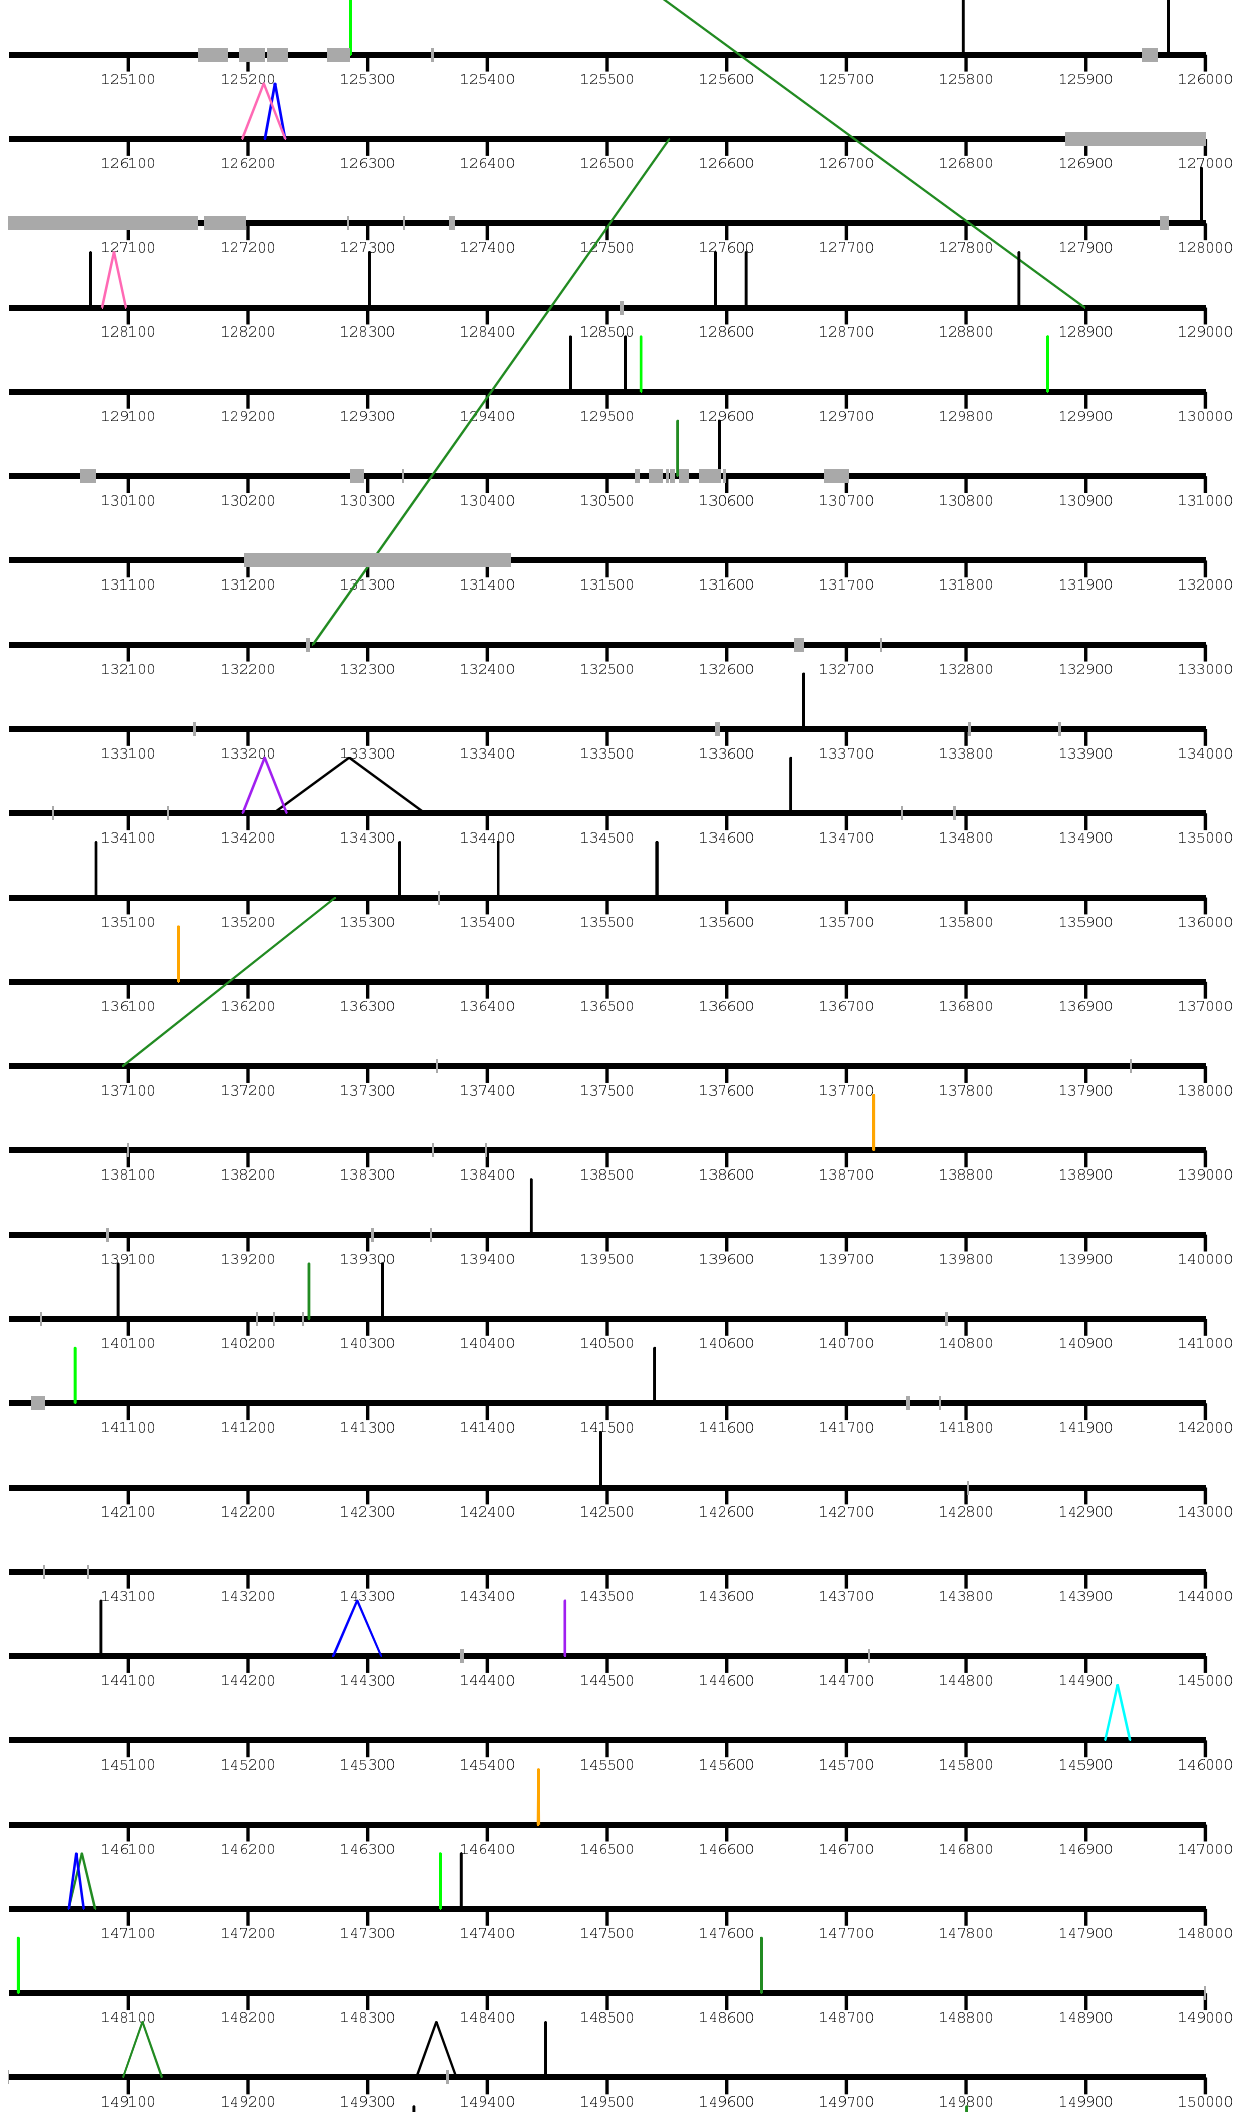

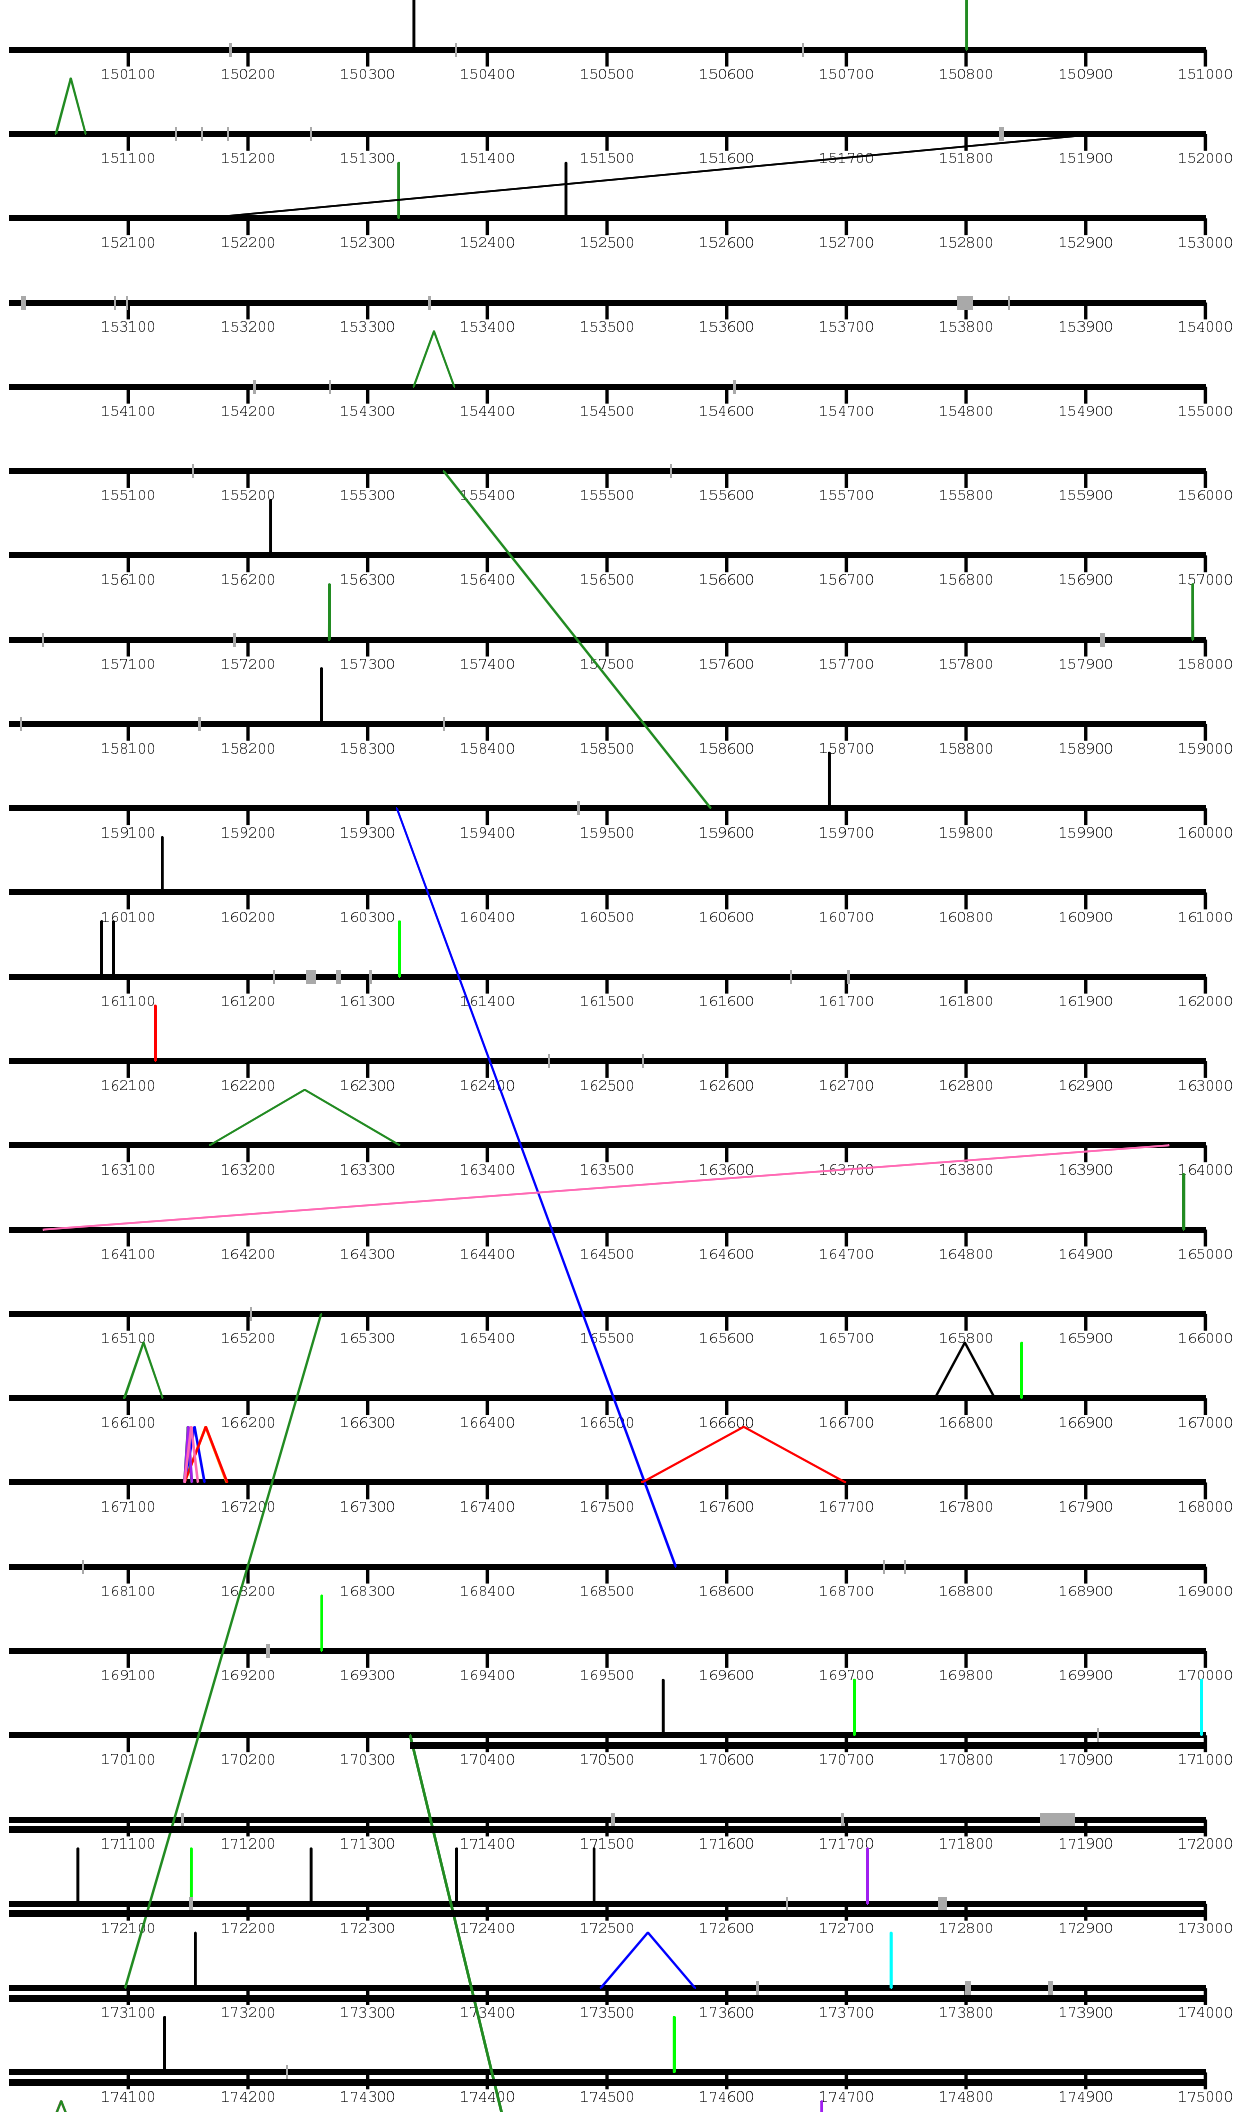

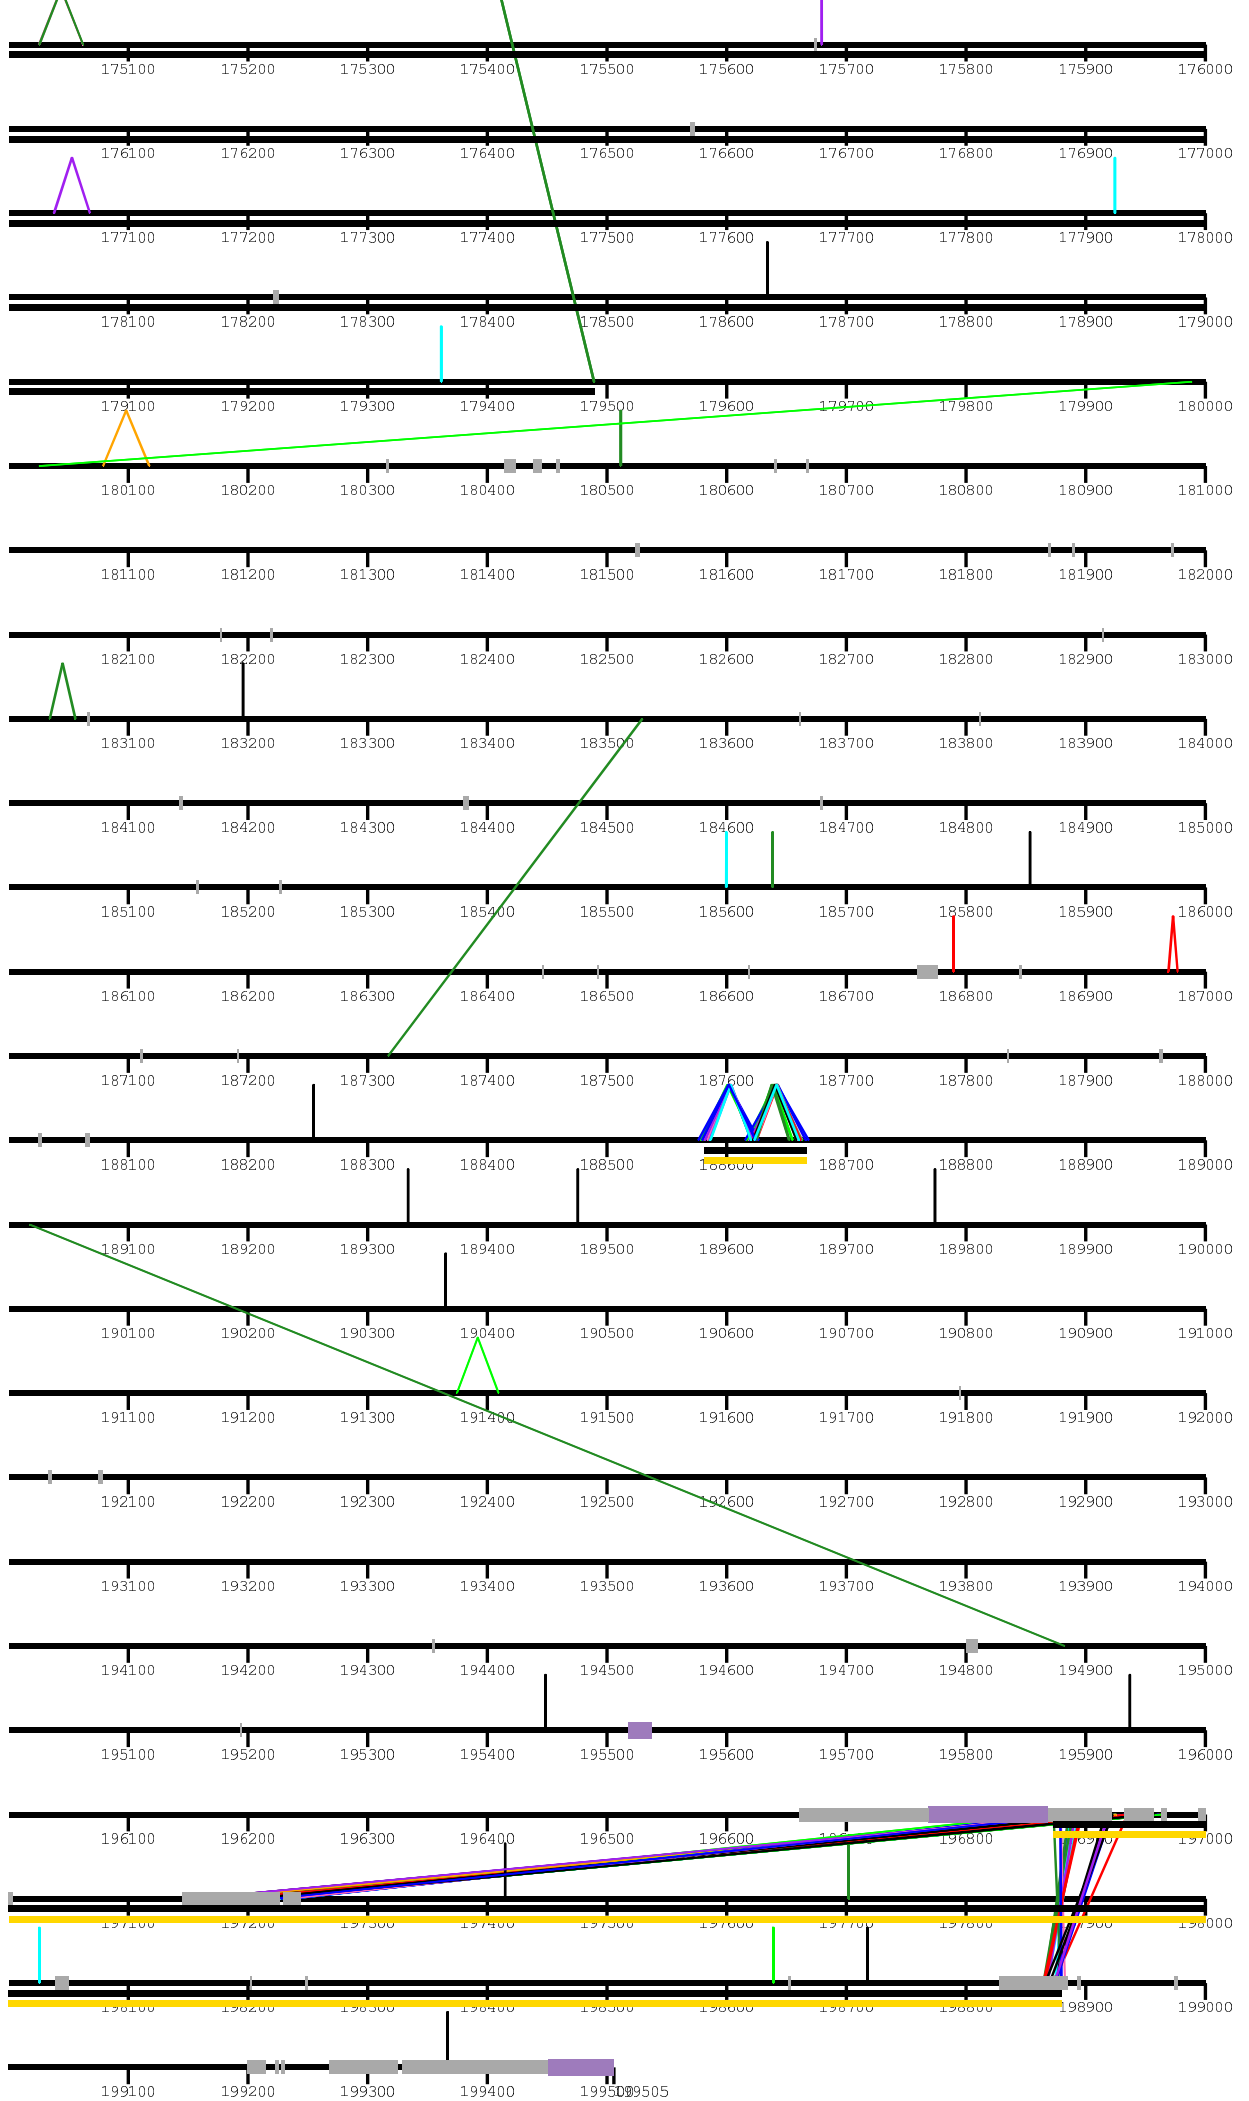

chr4

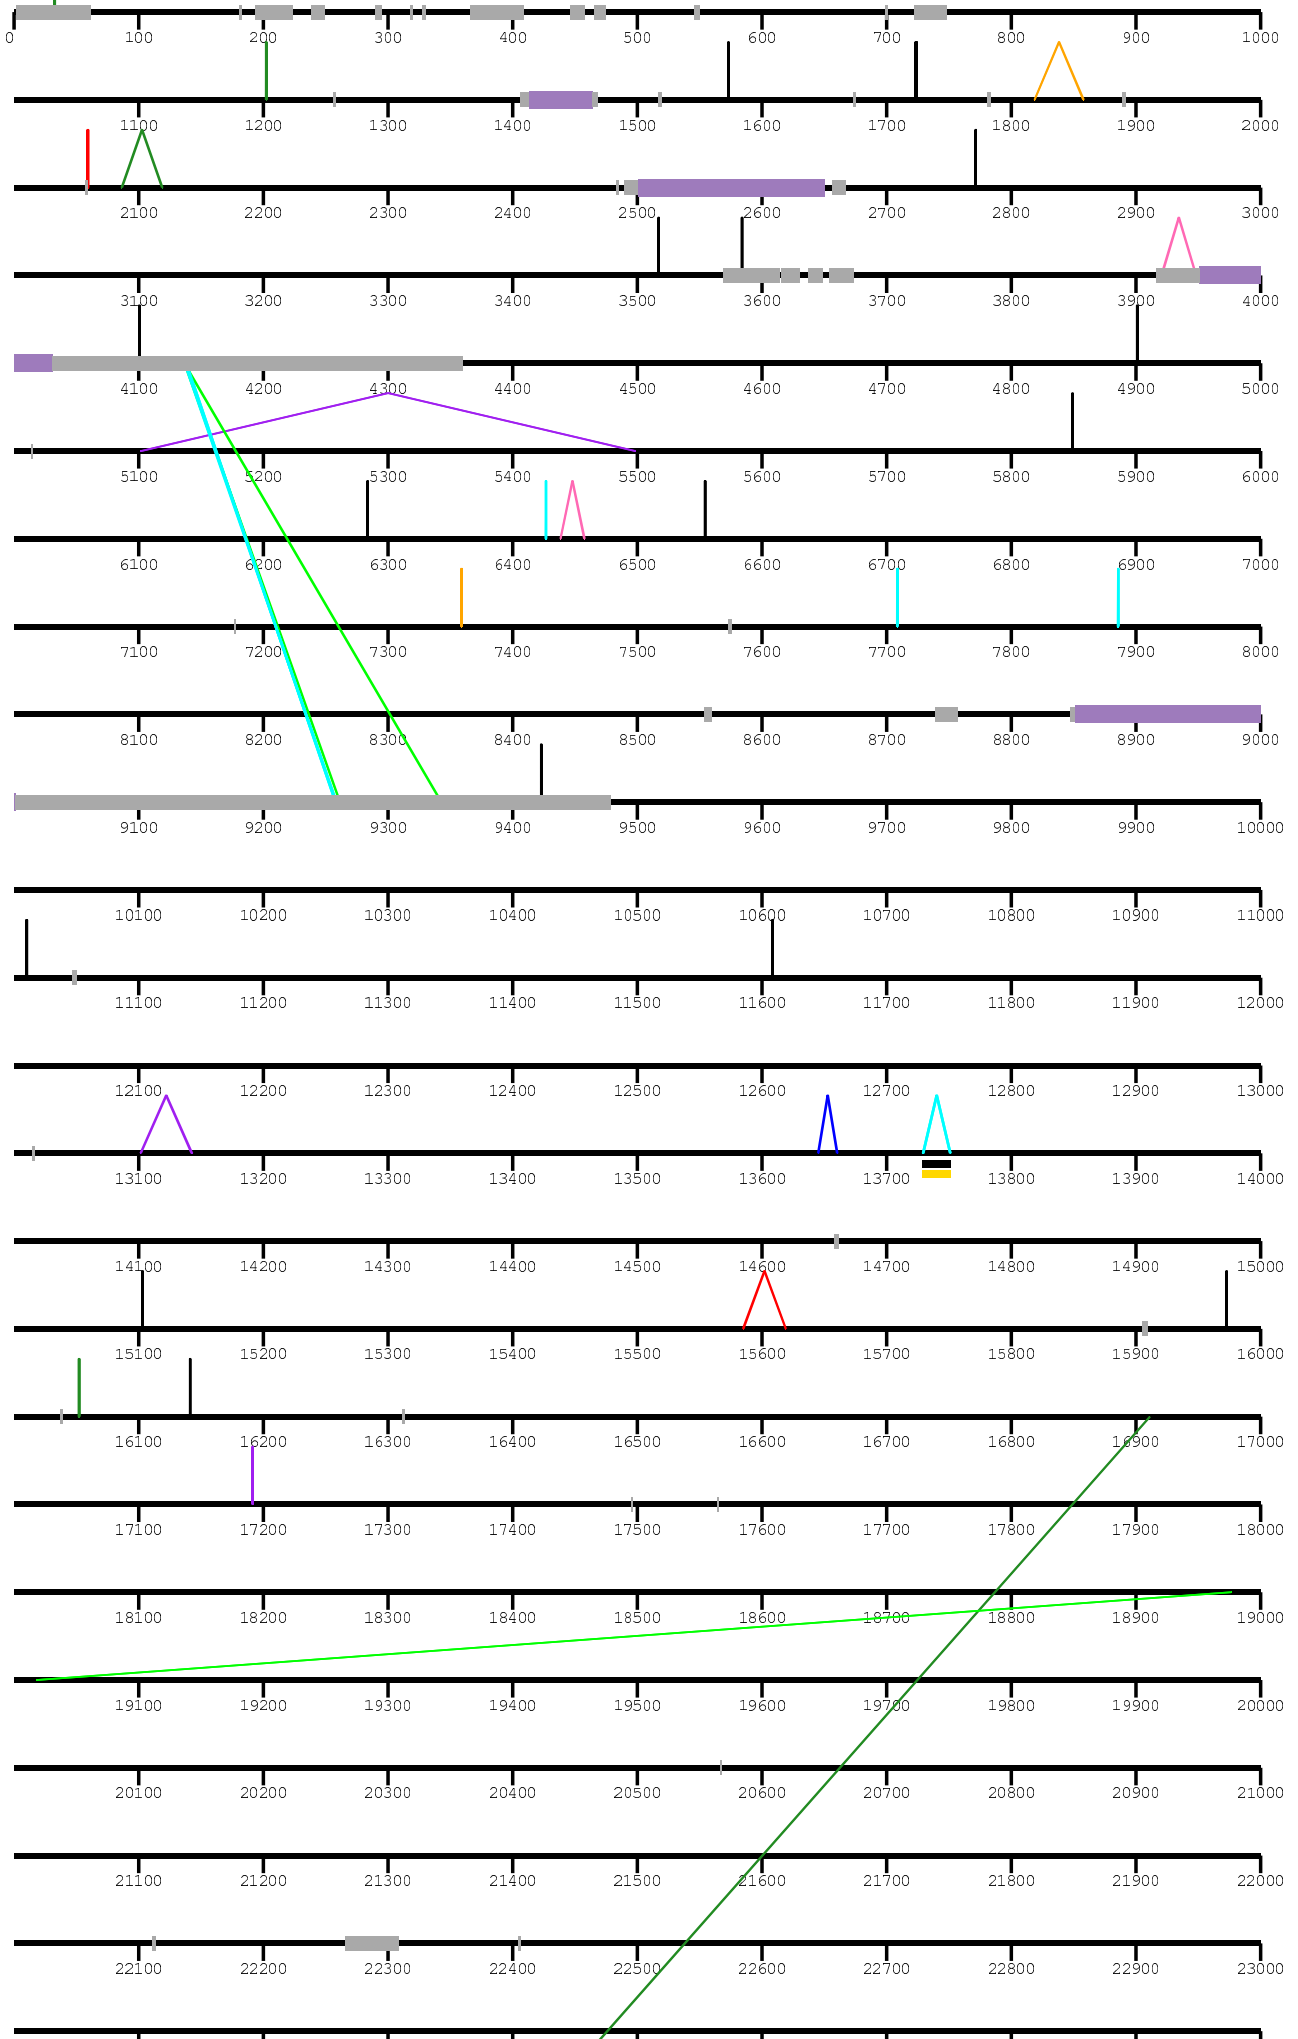

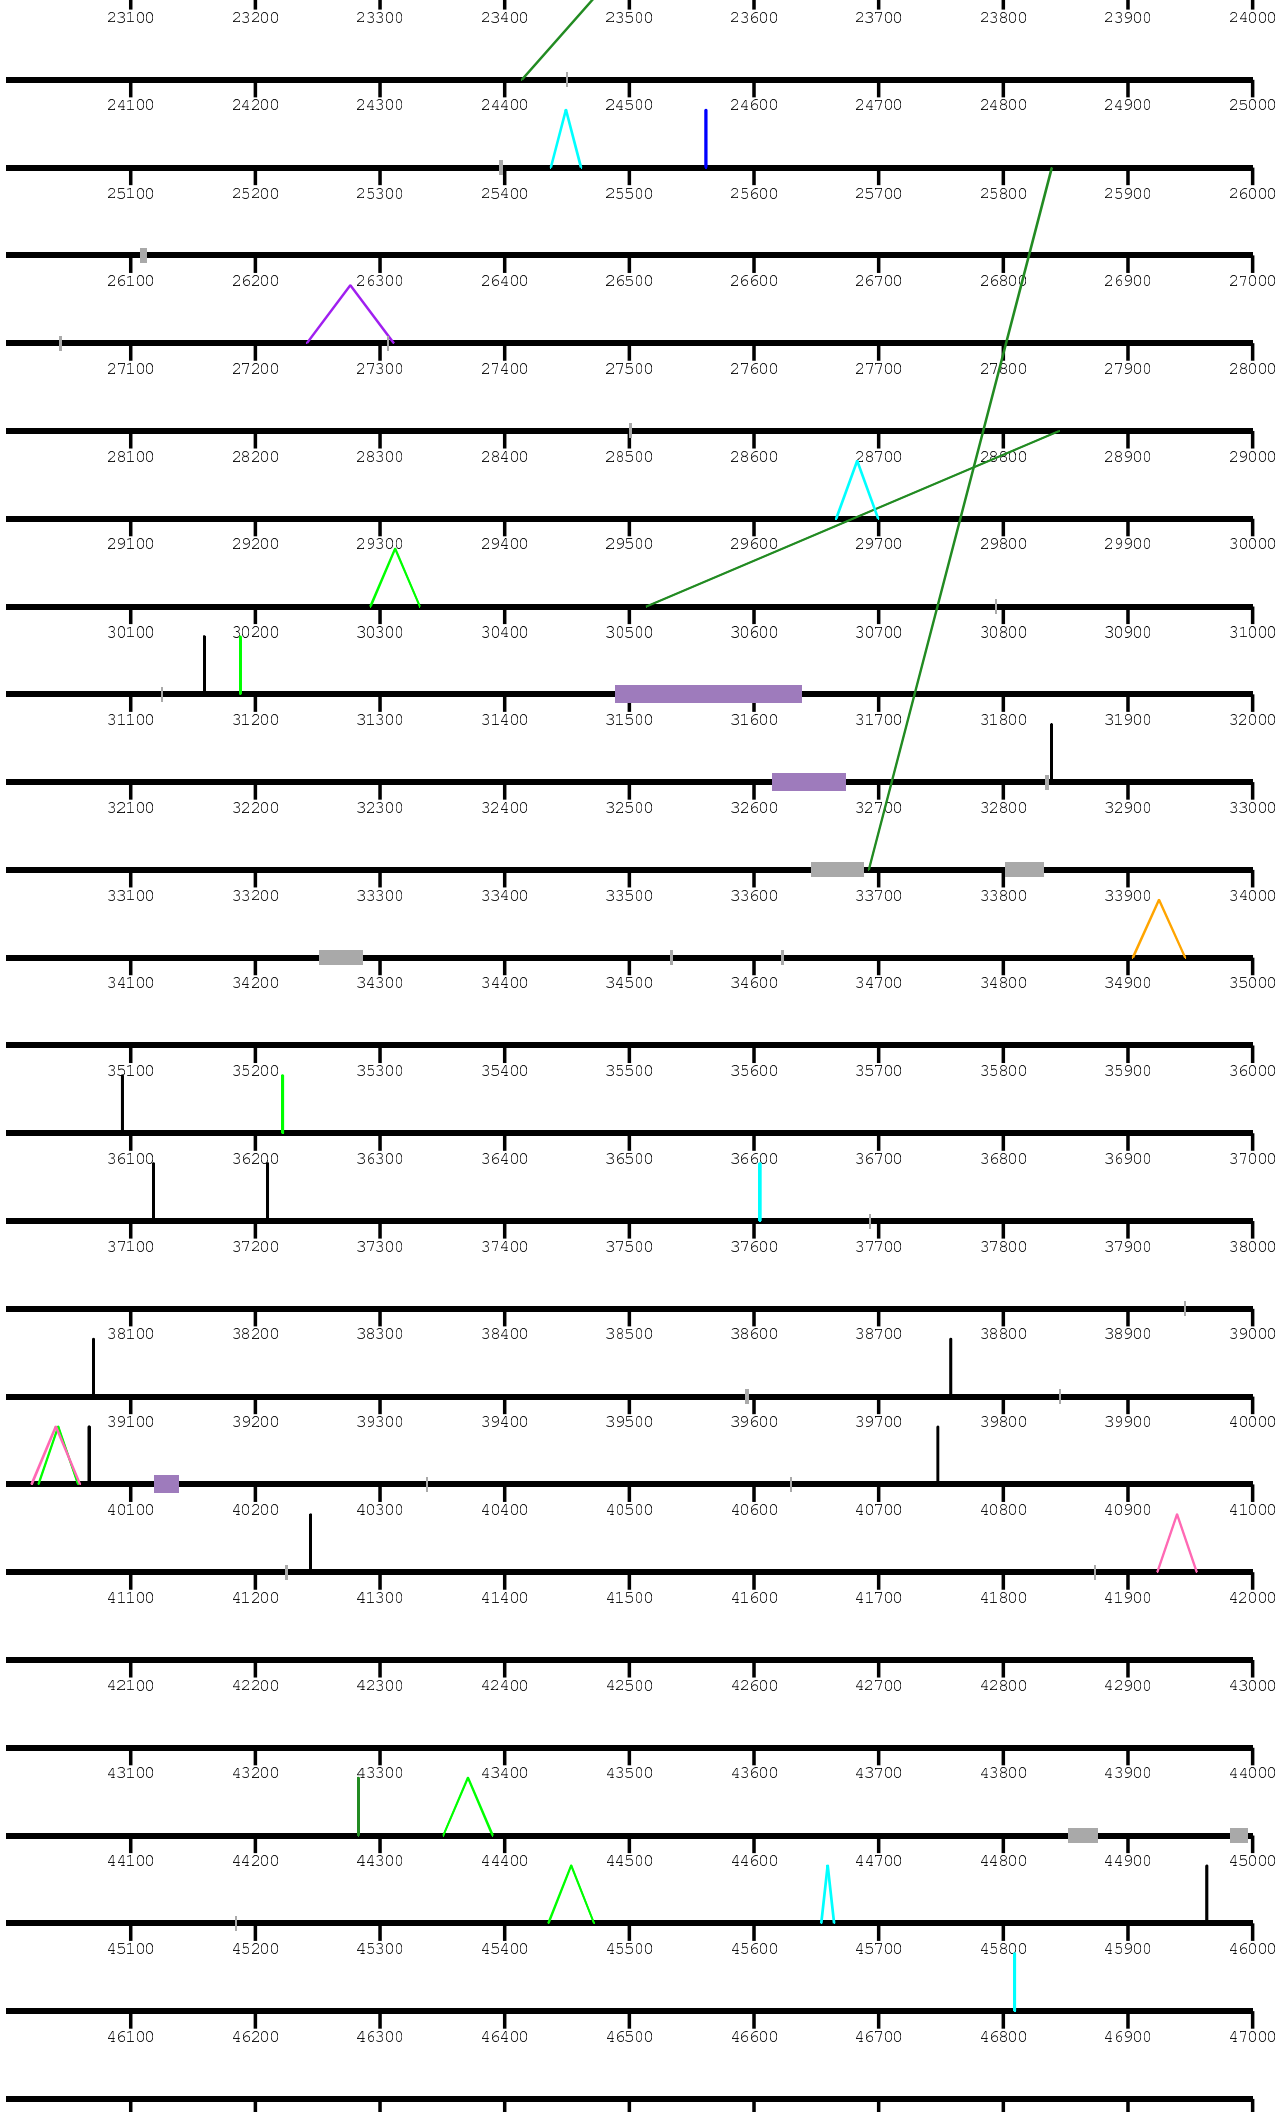

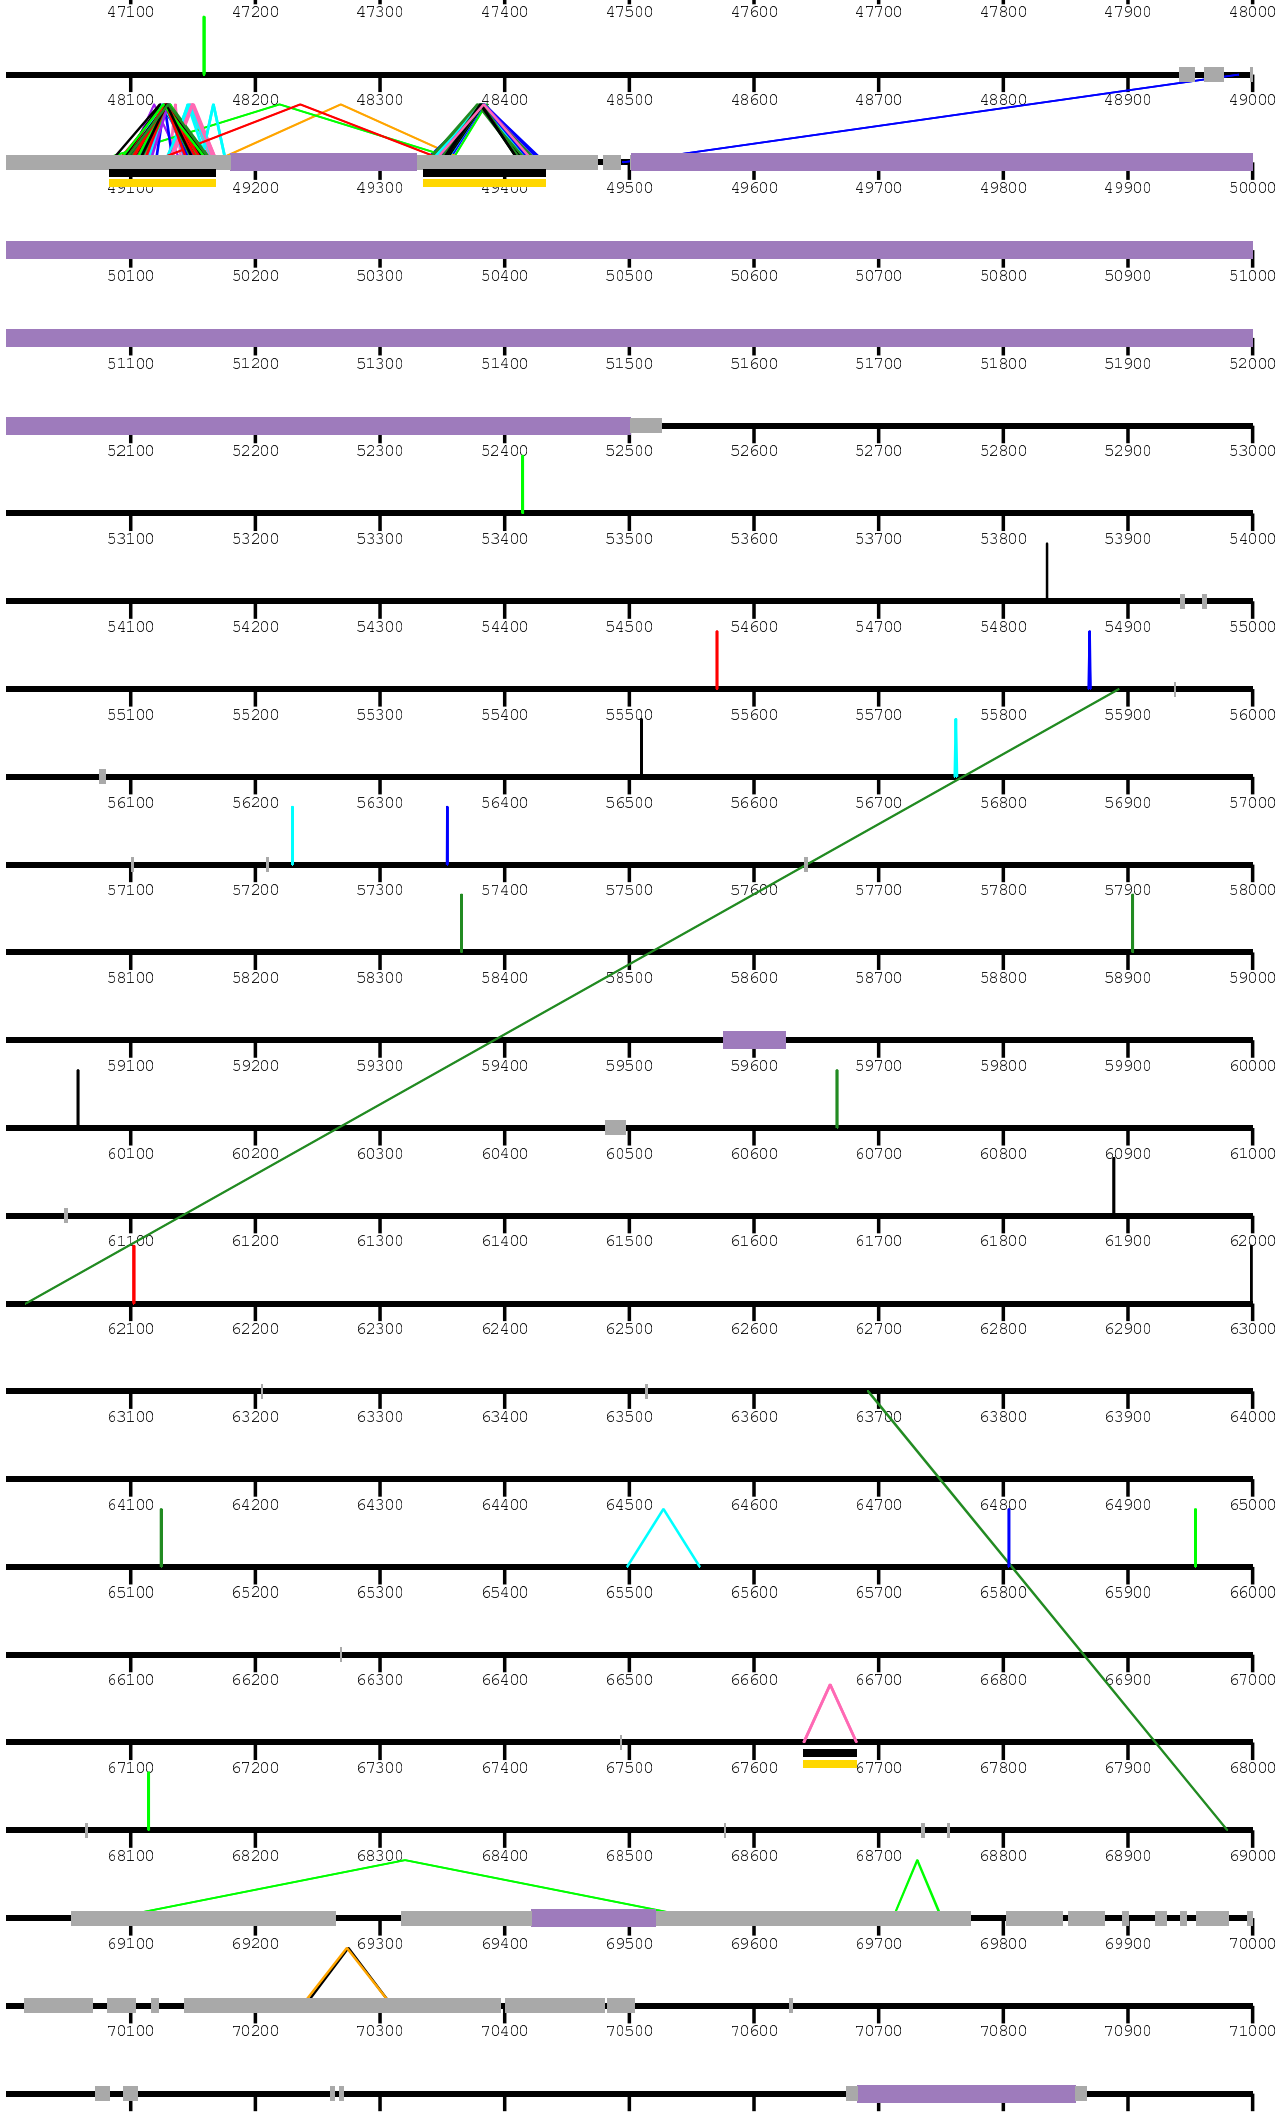

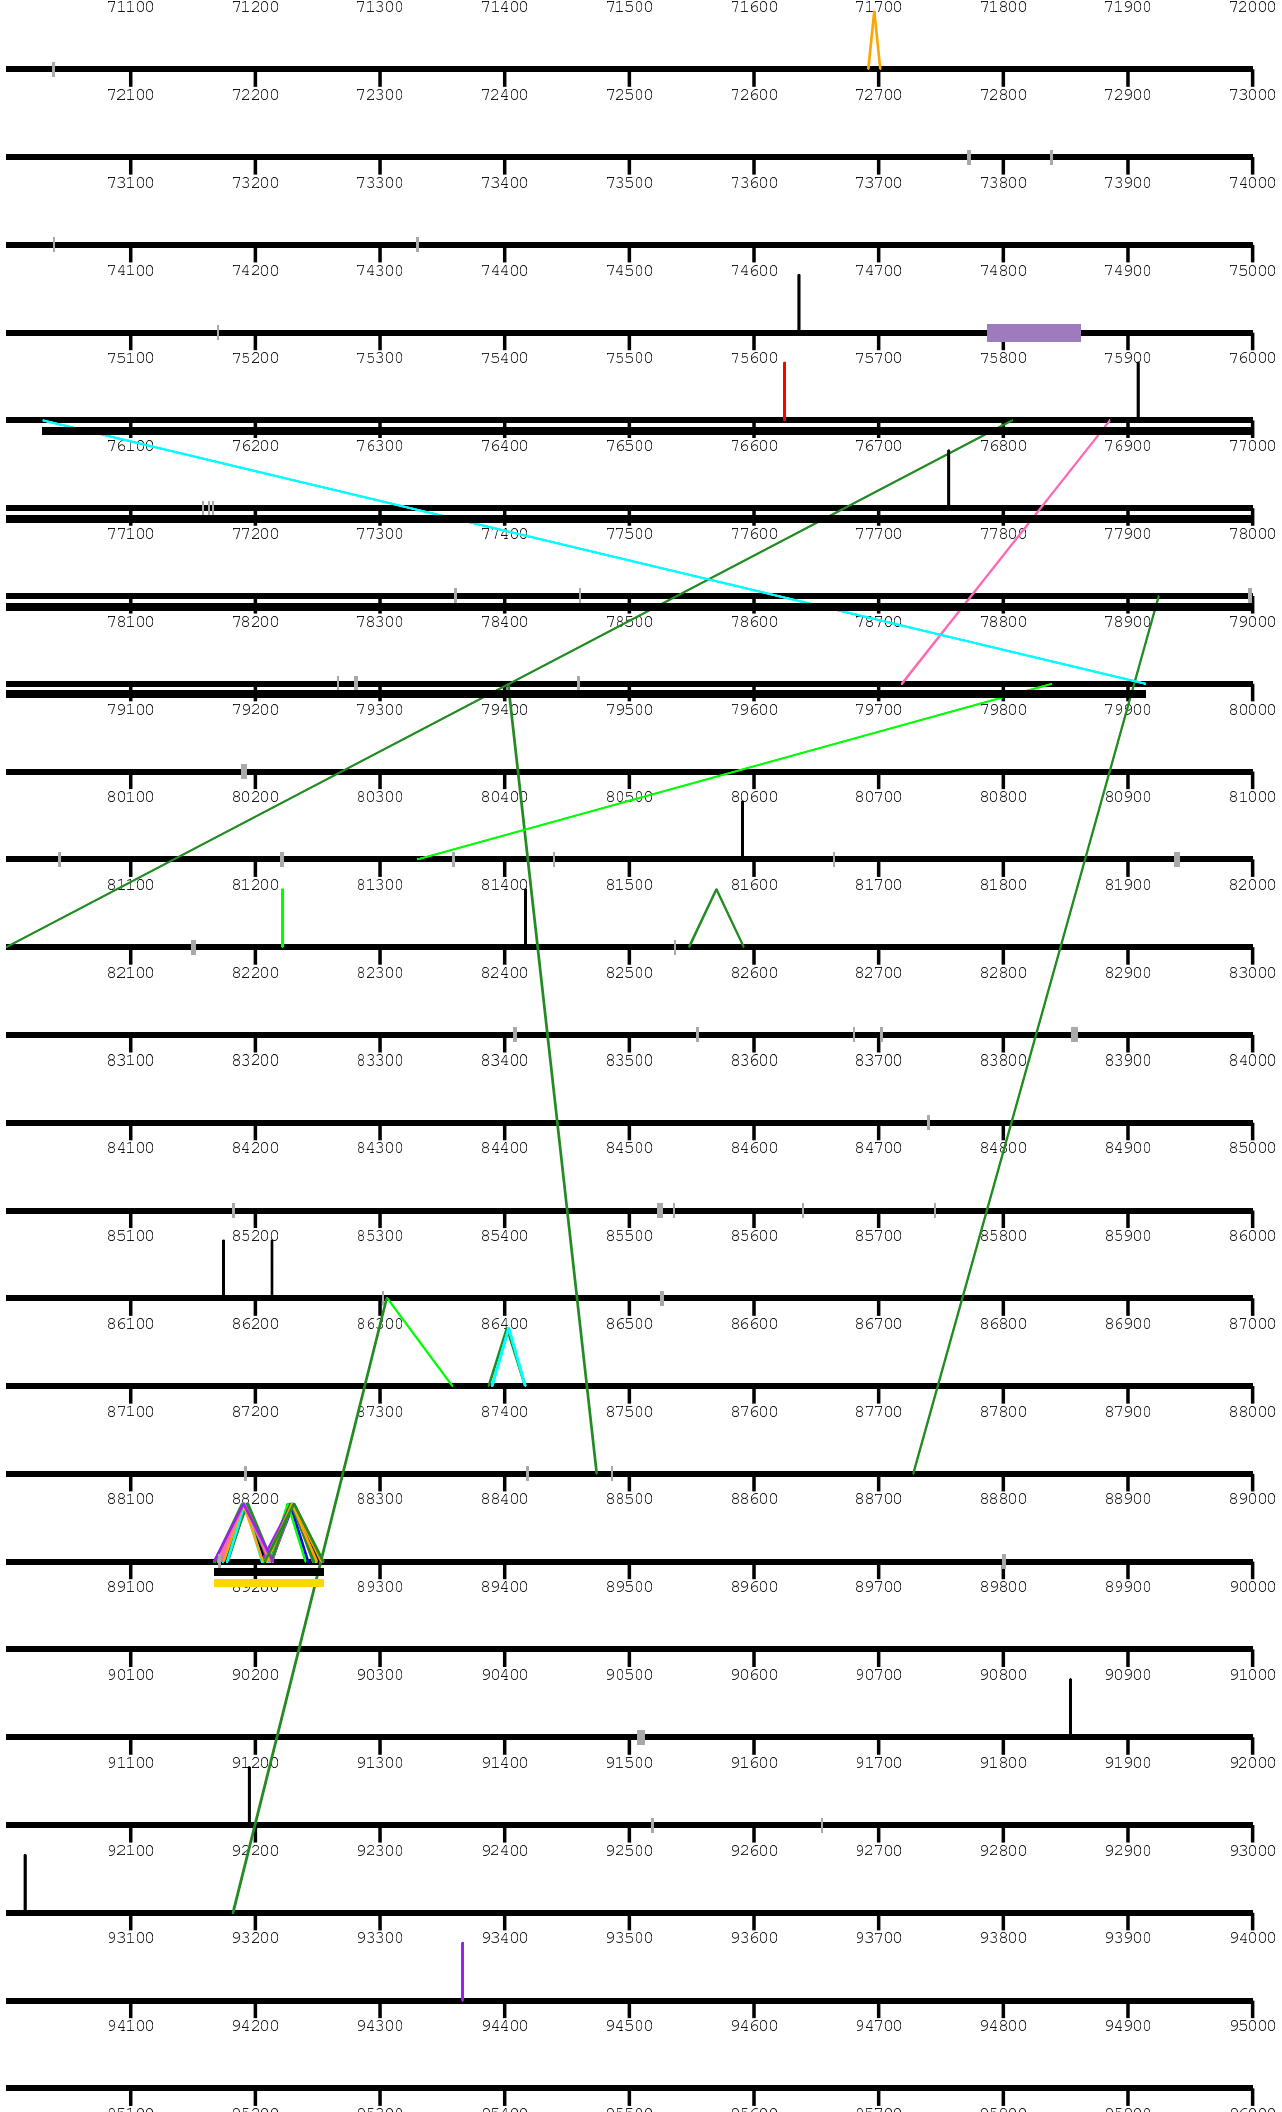



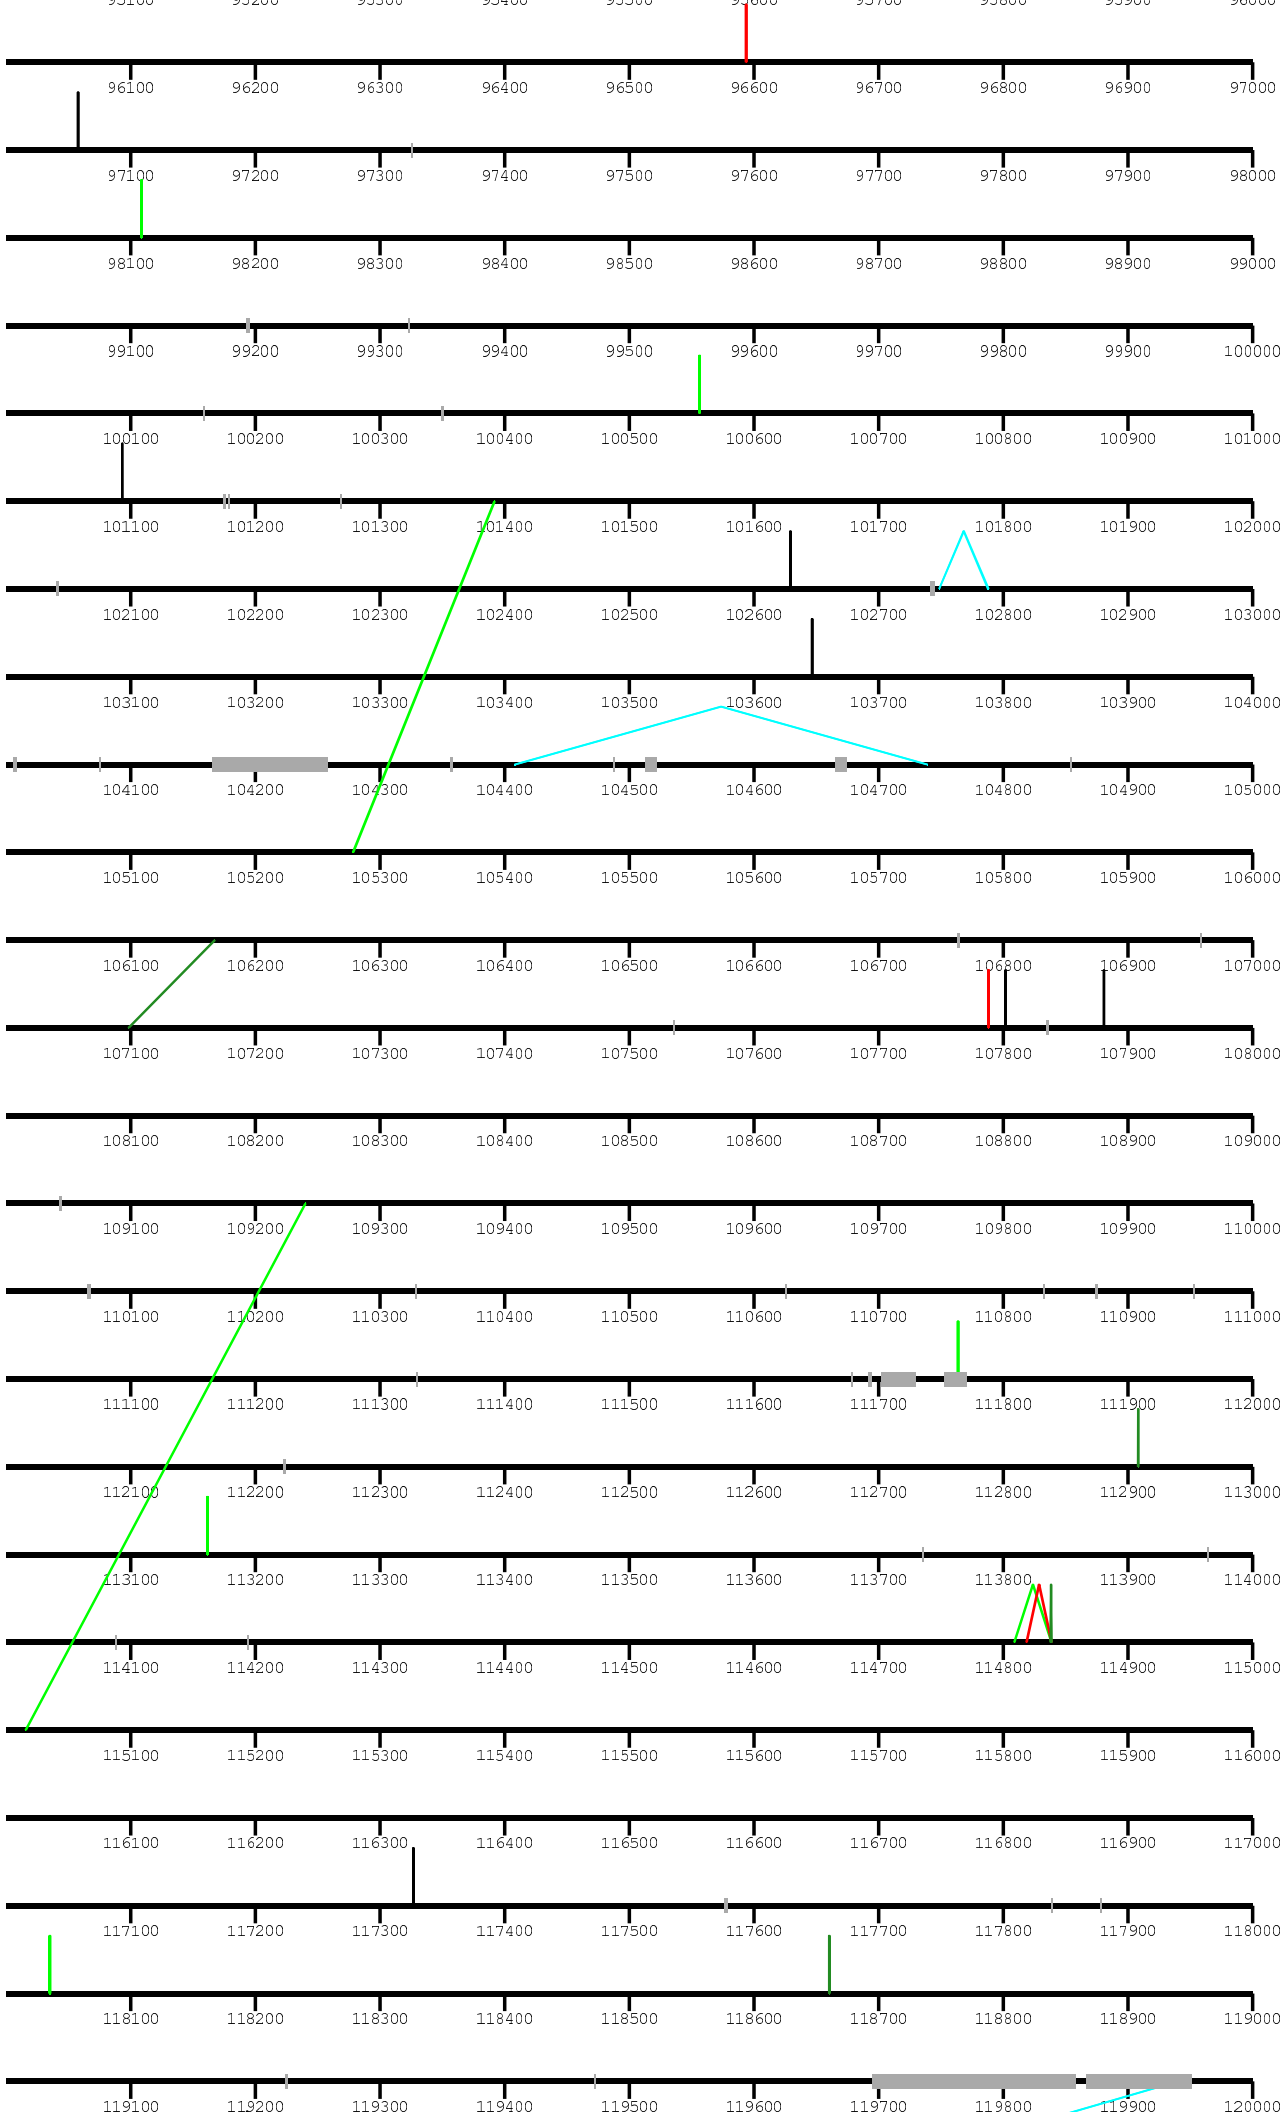

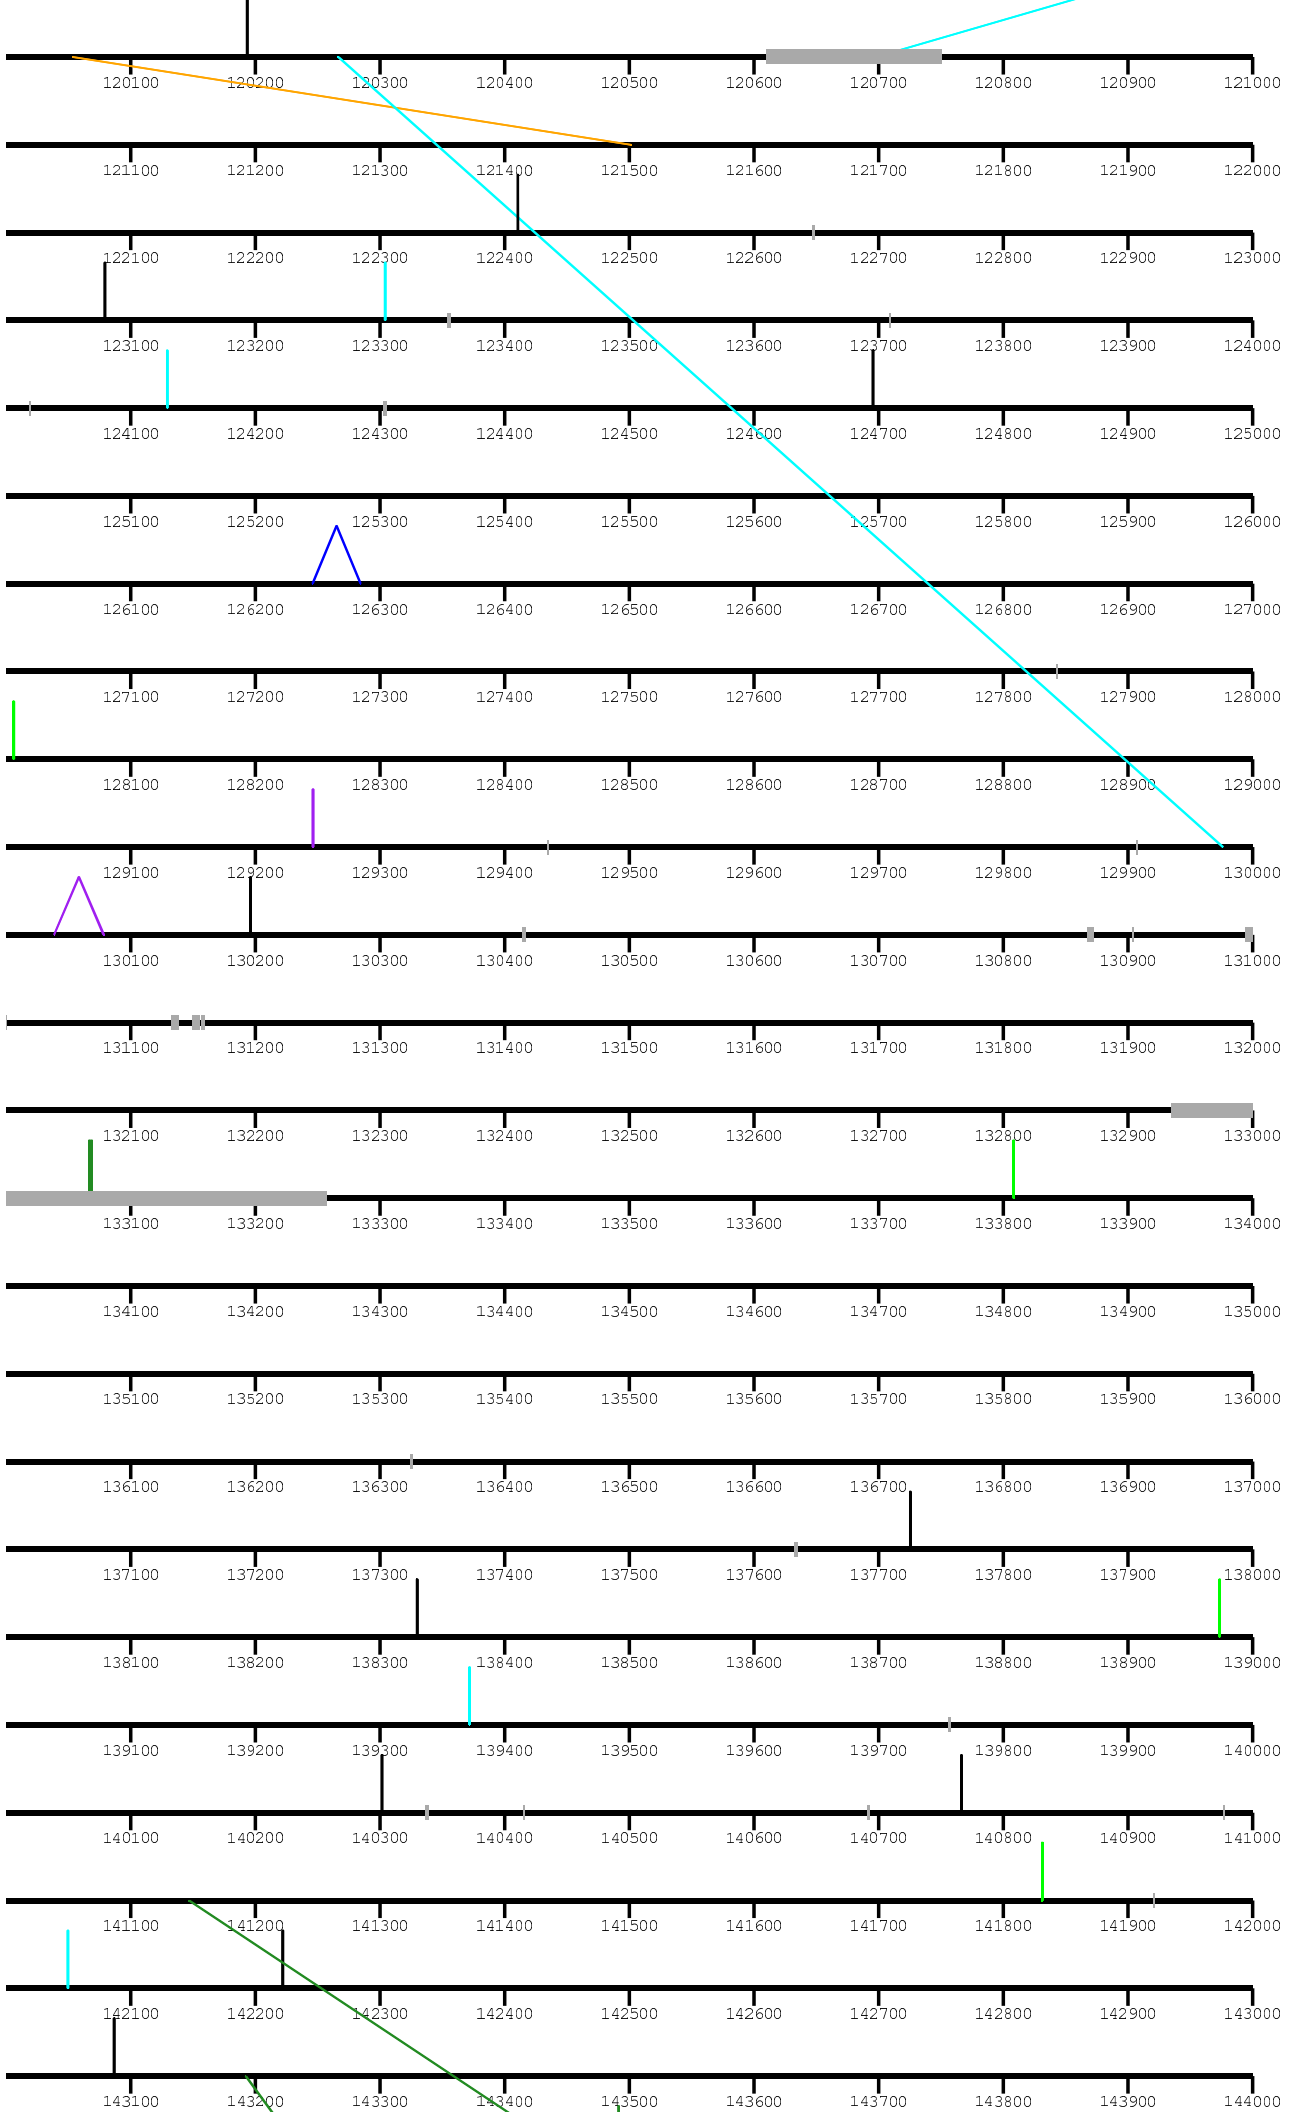

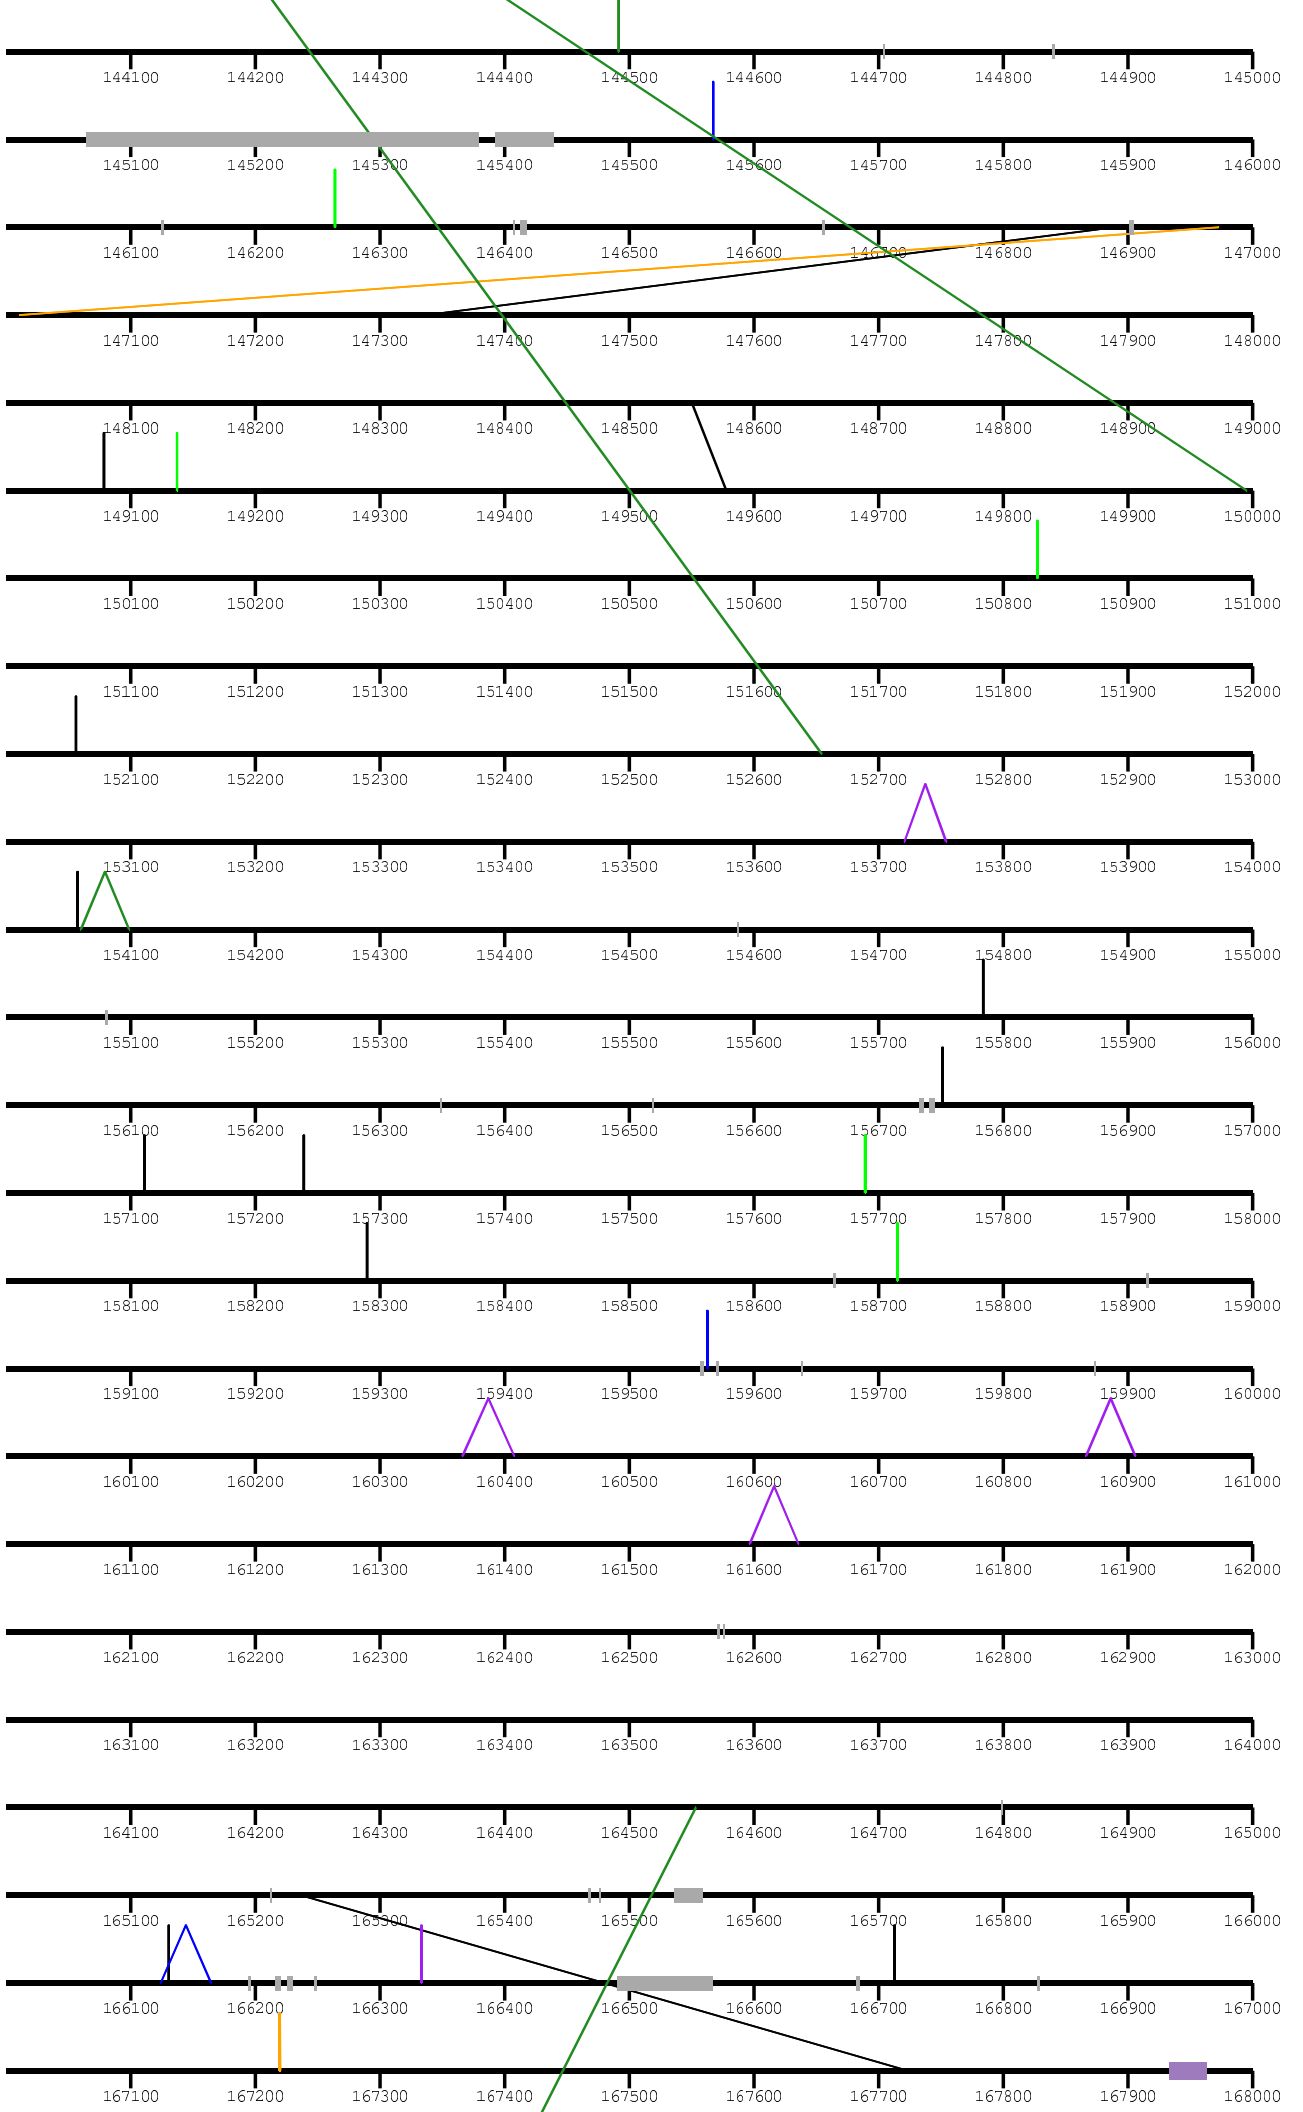

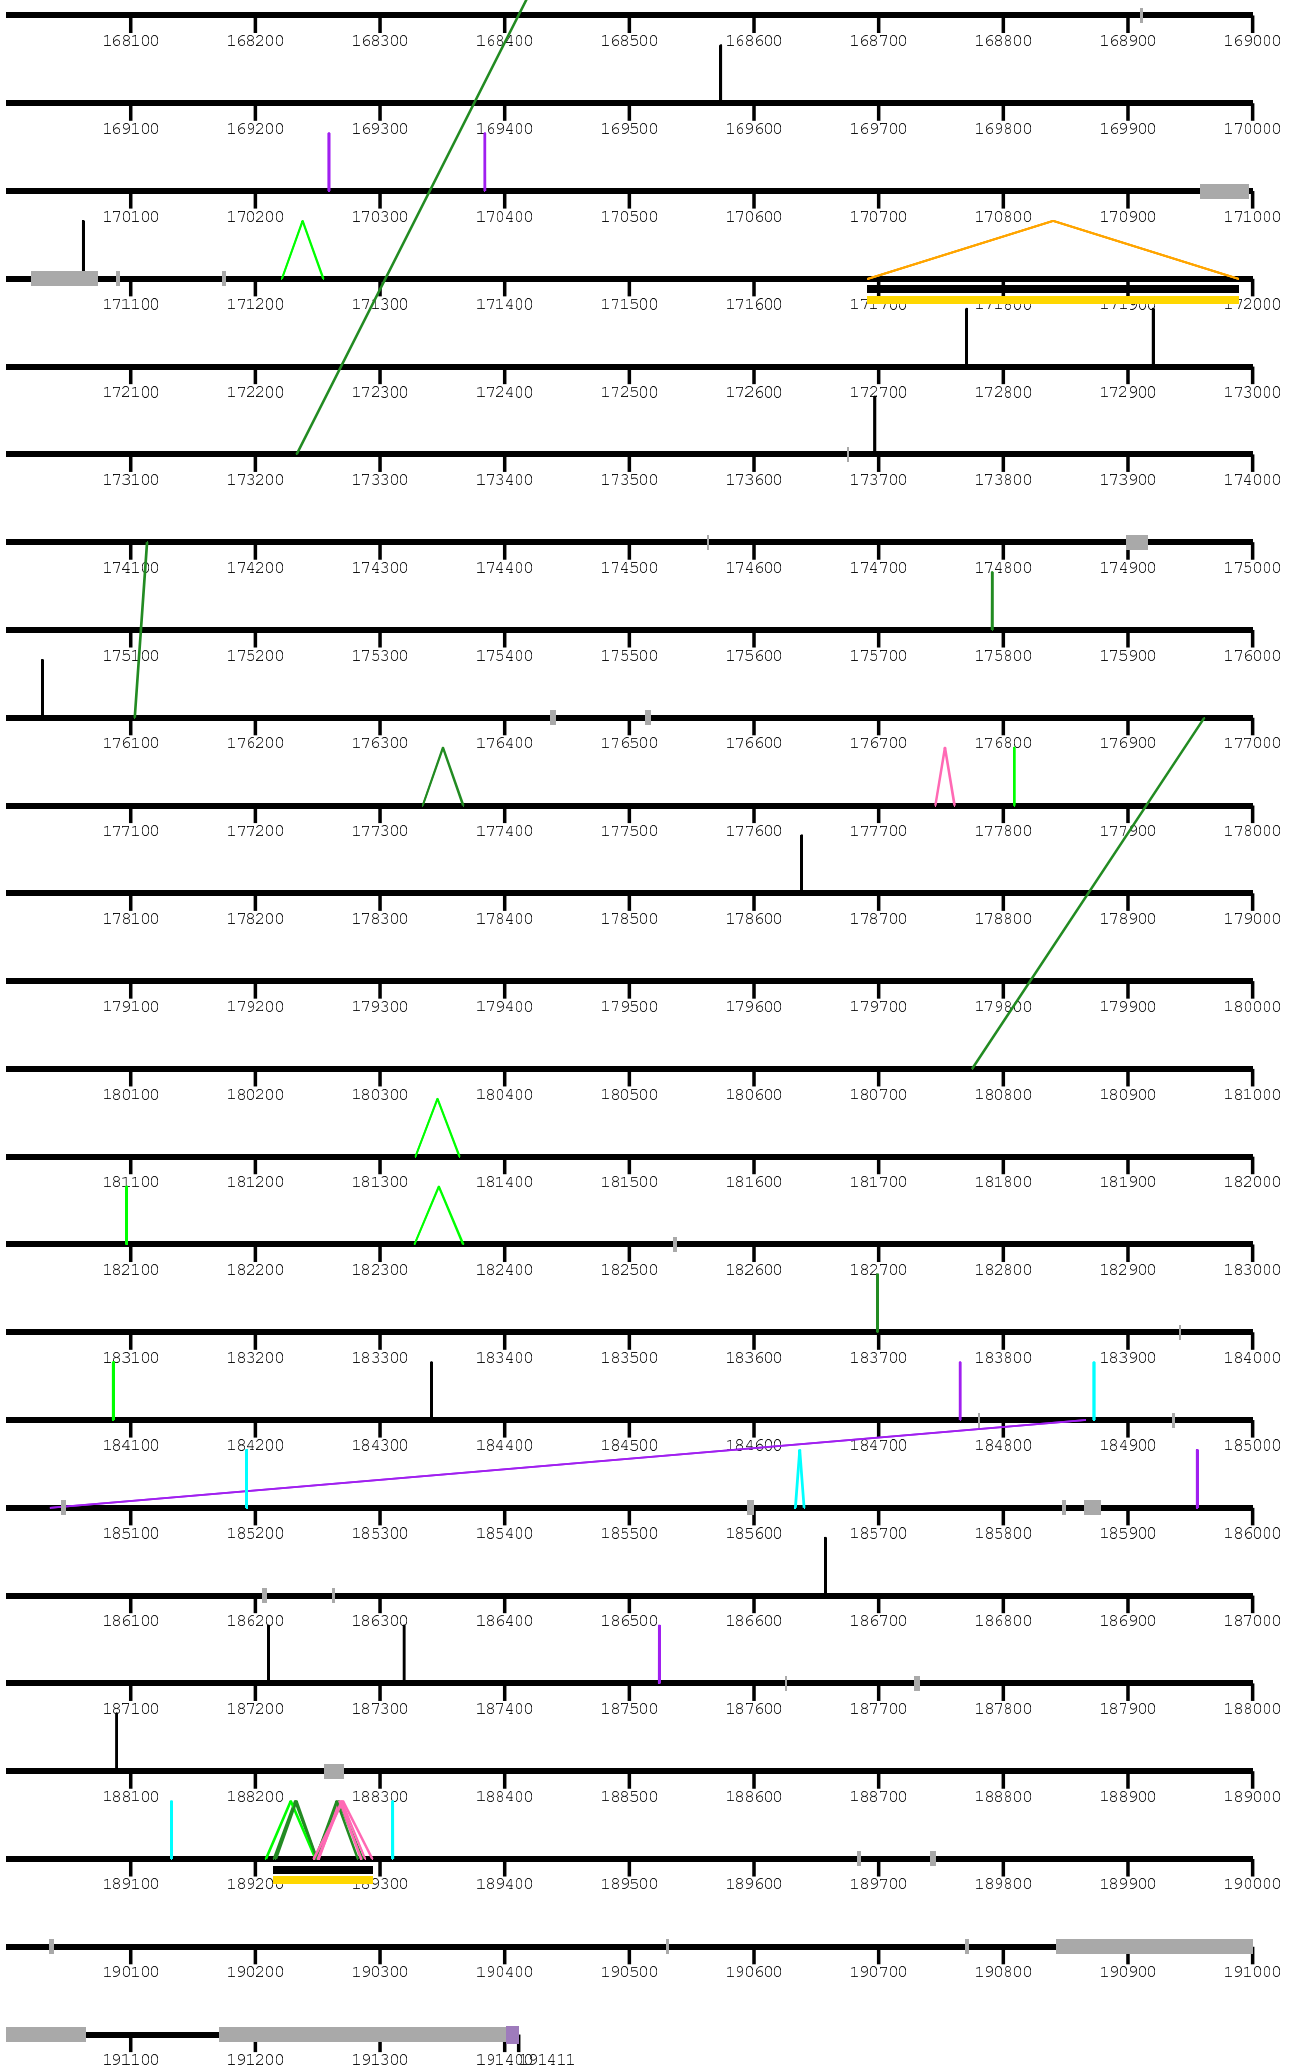

chr5

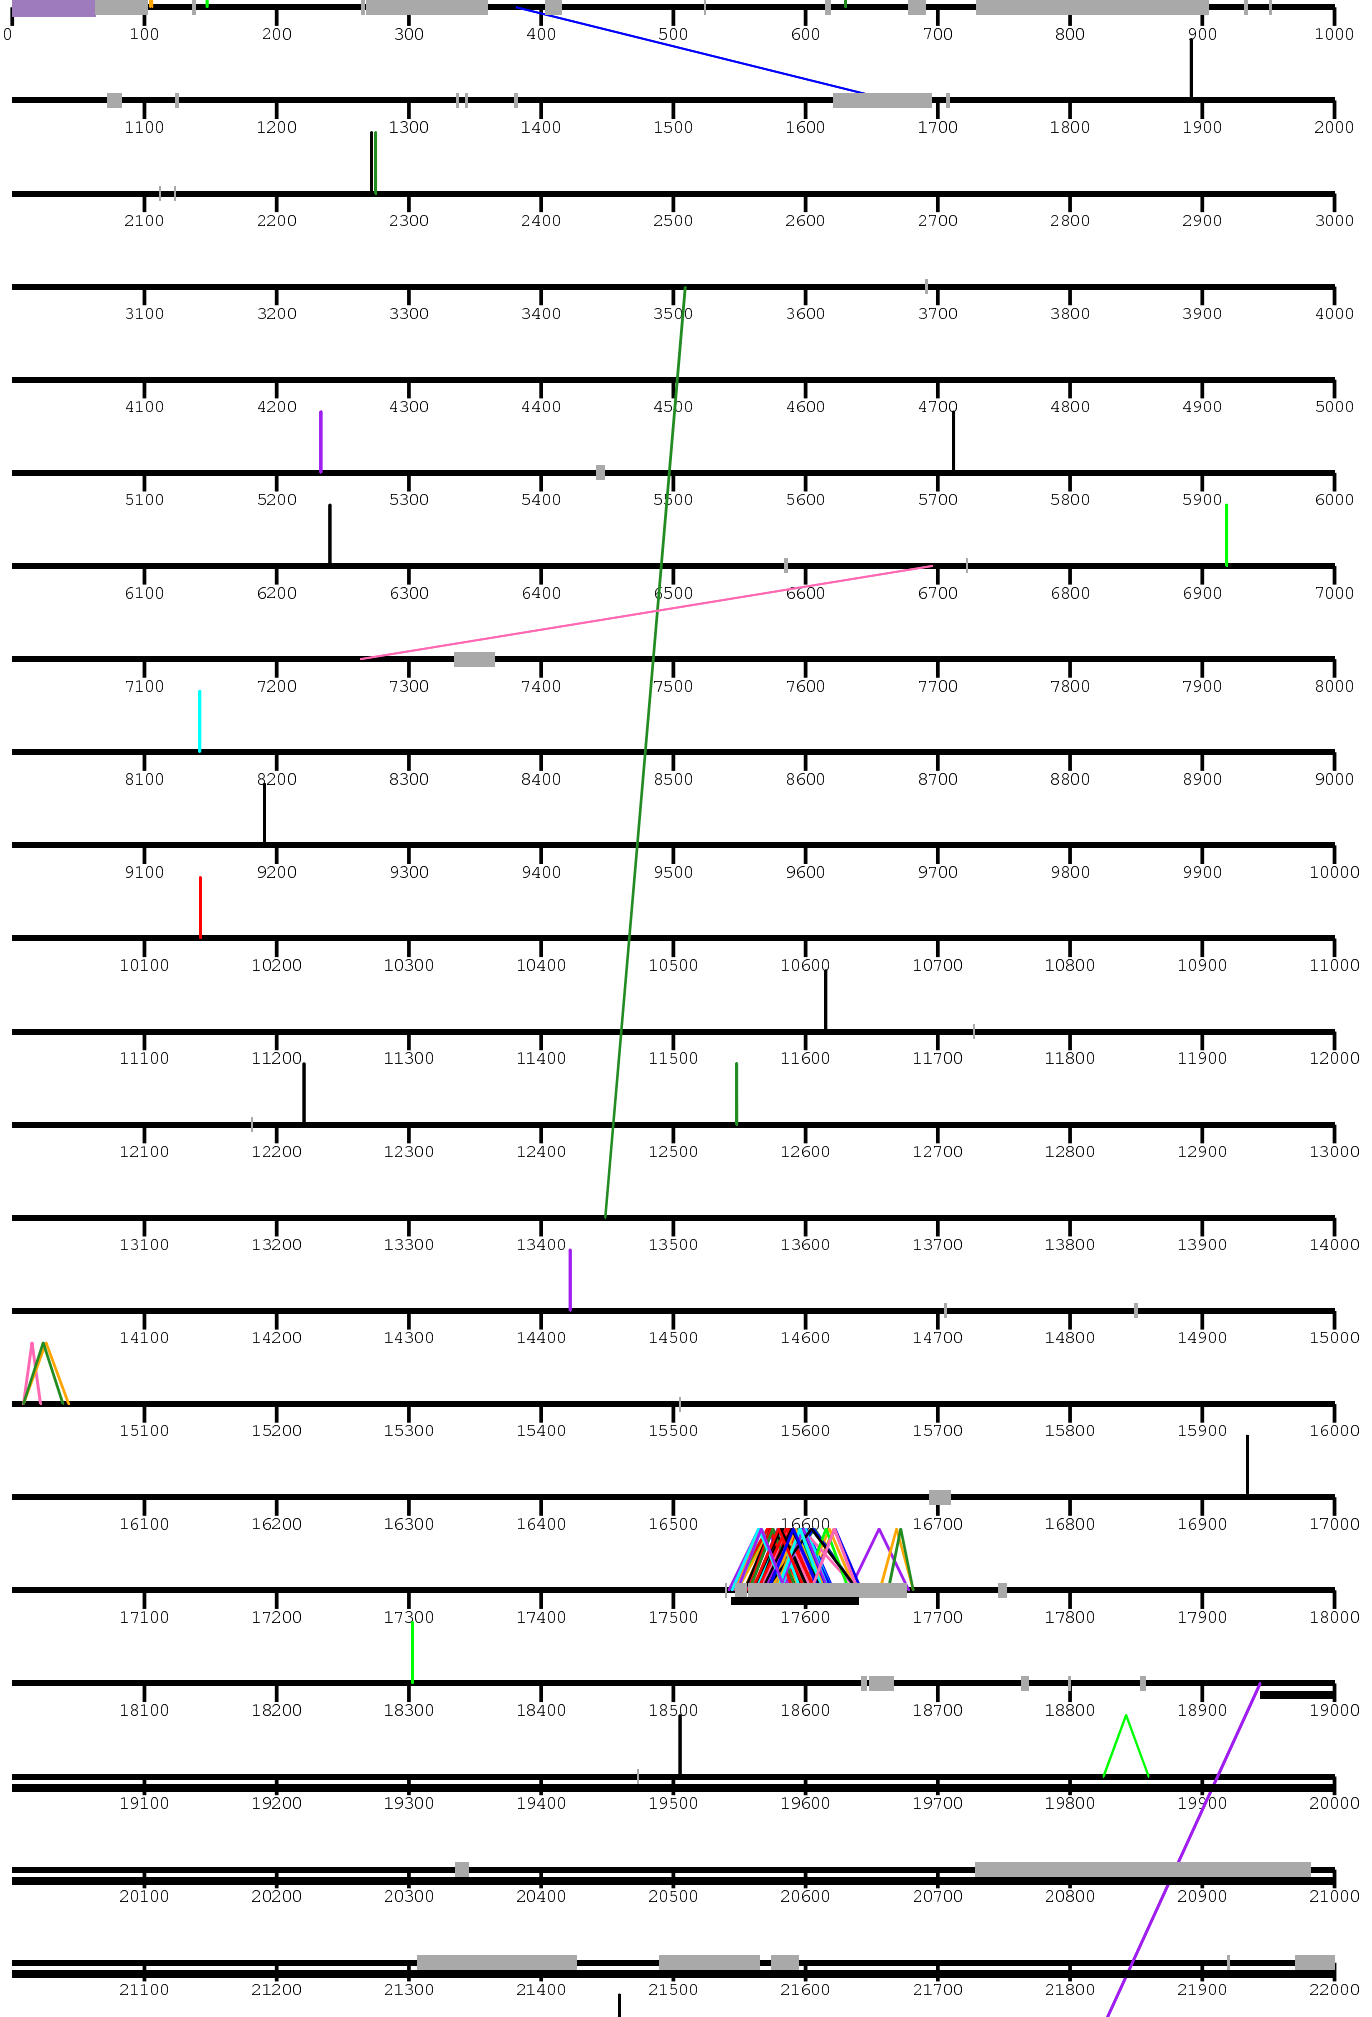

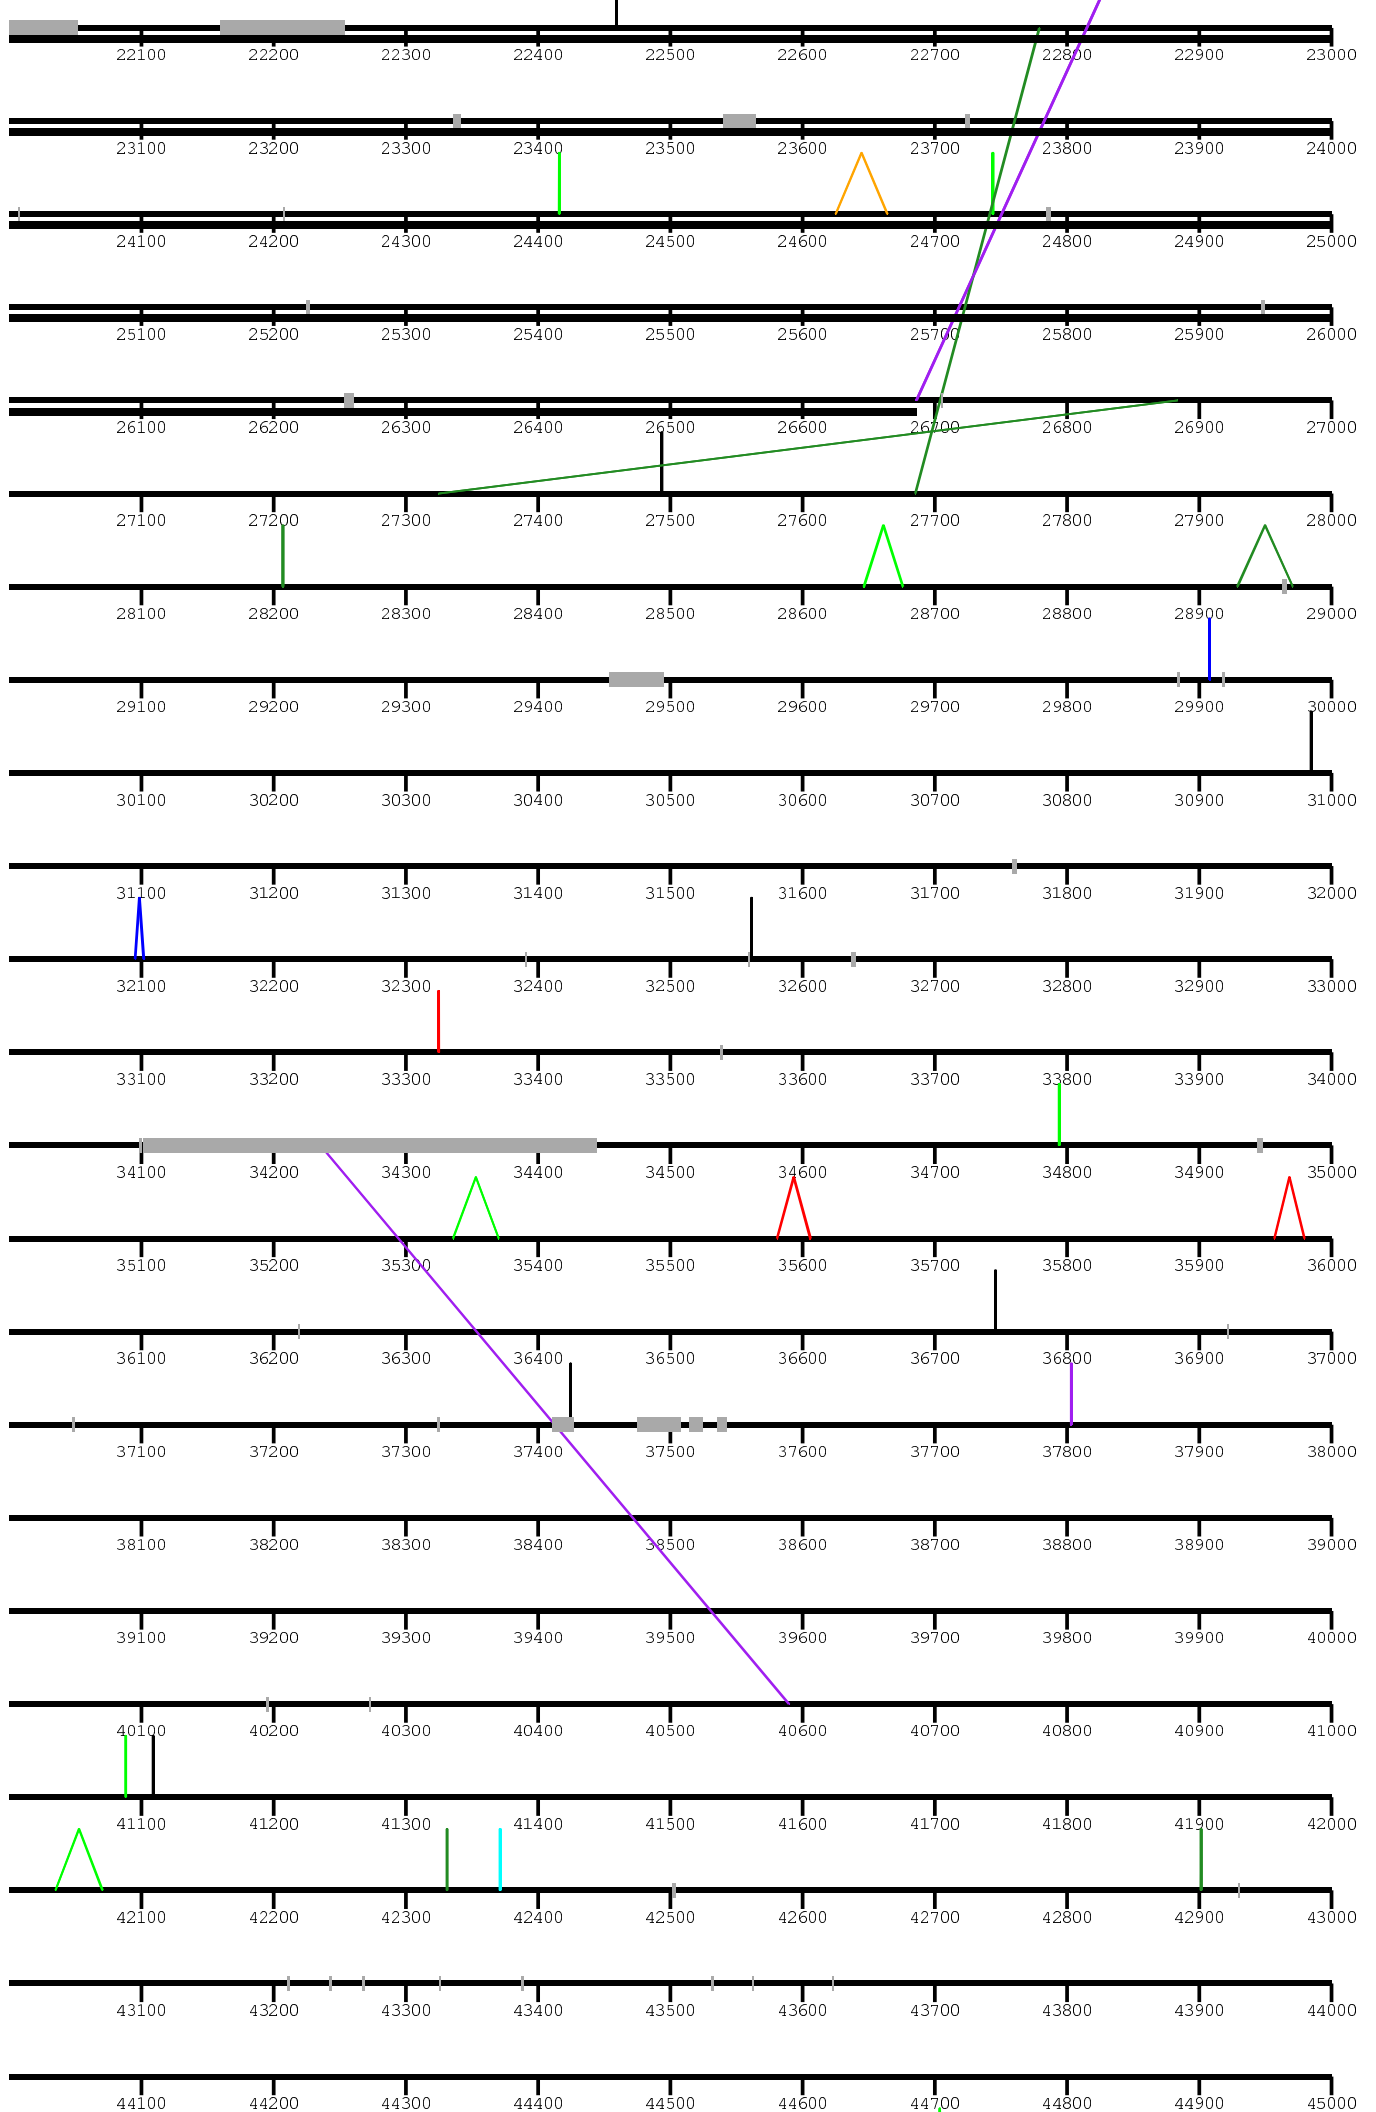

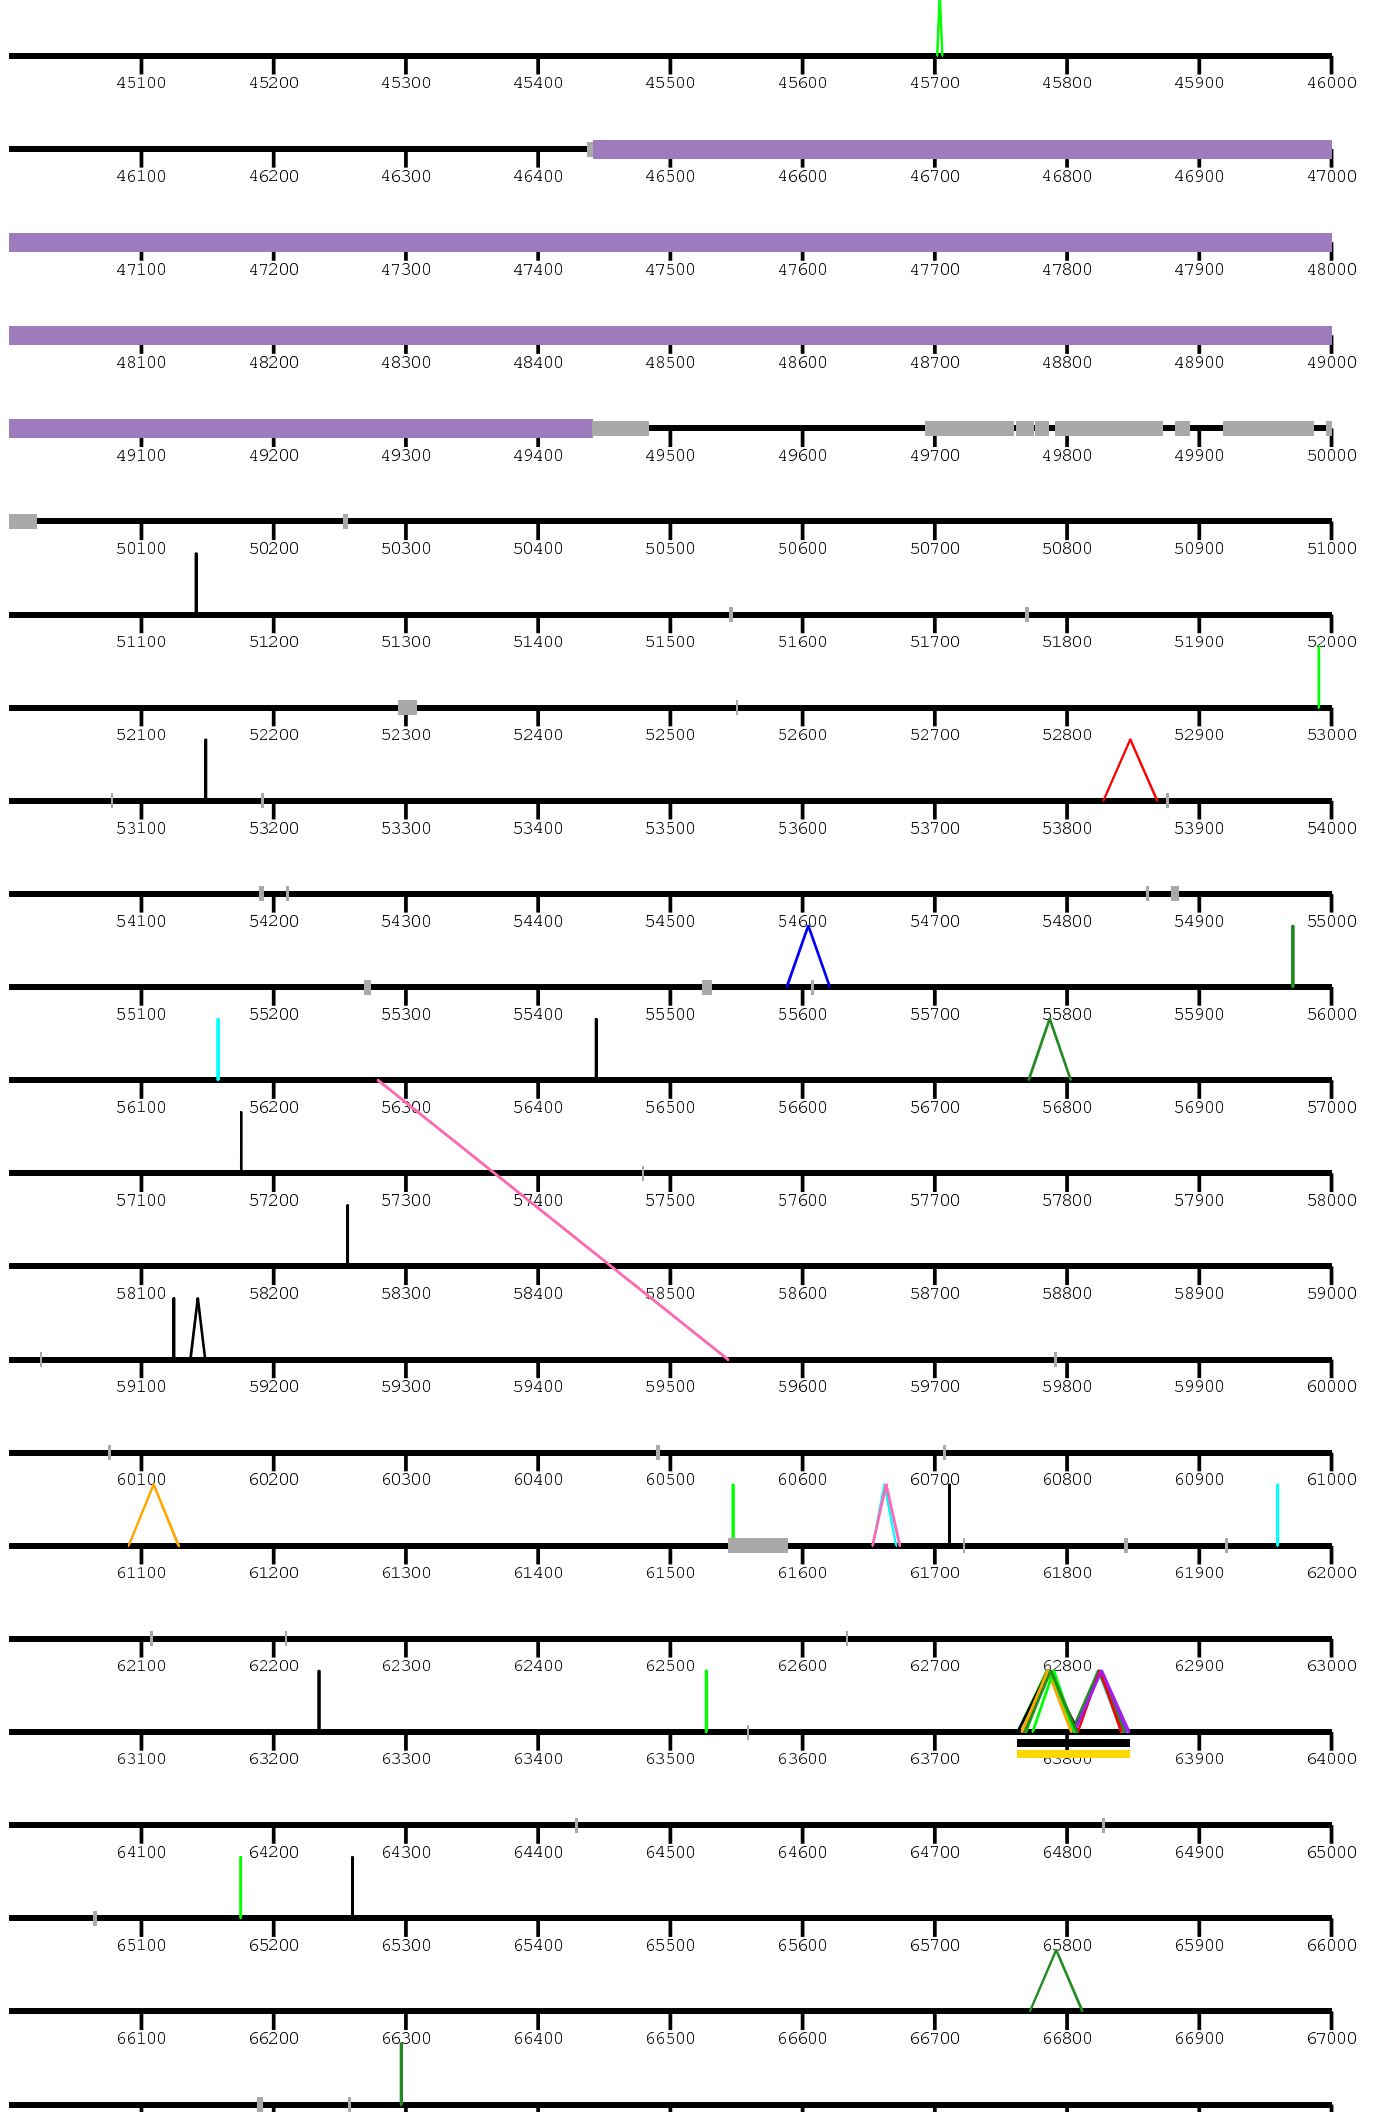

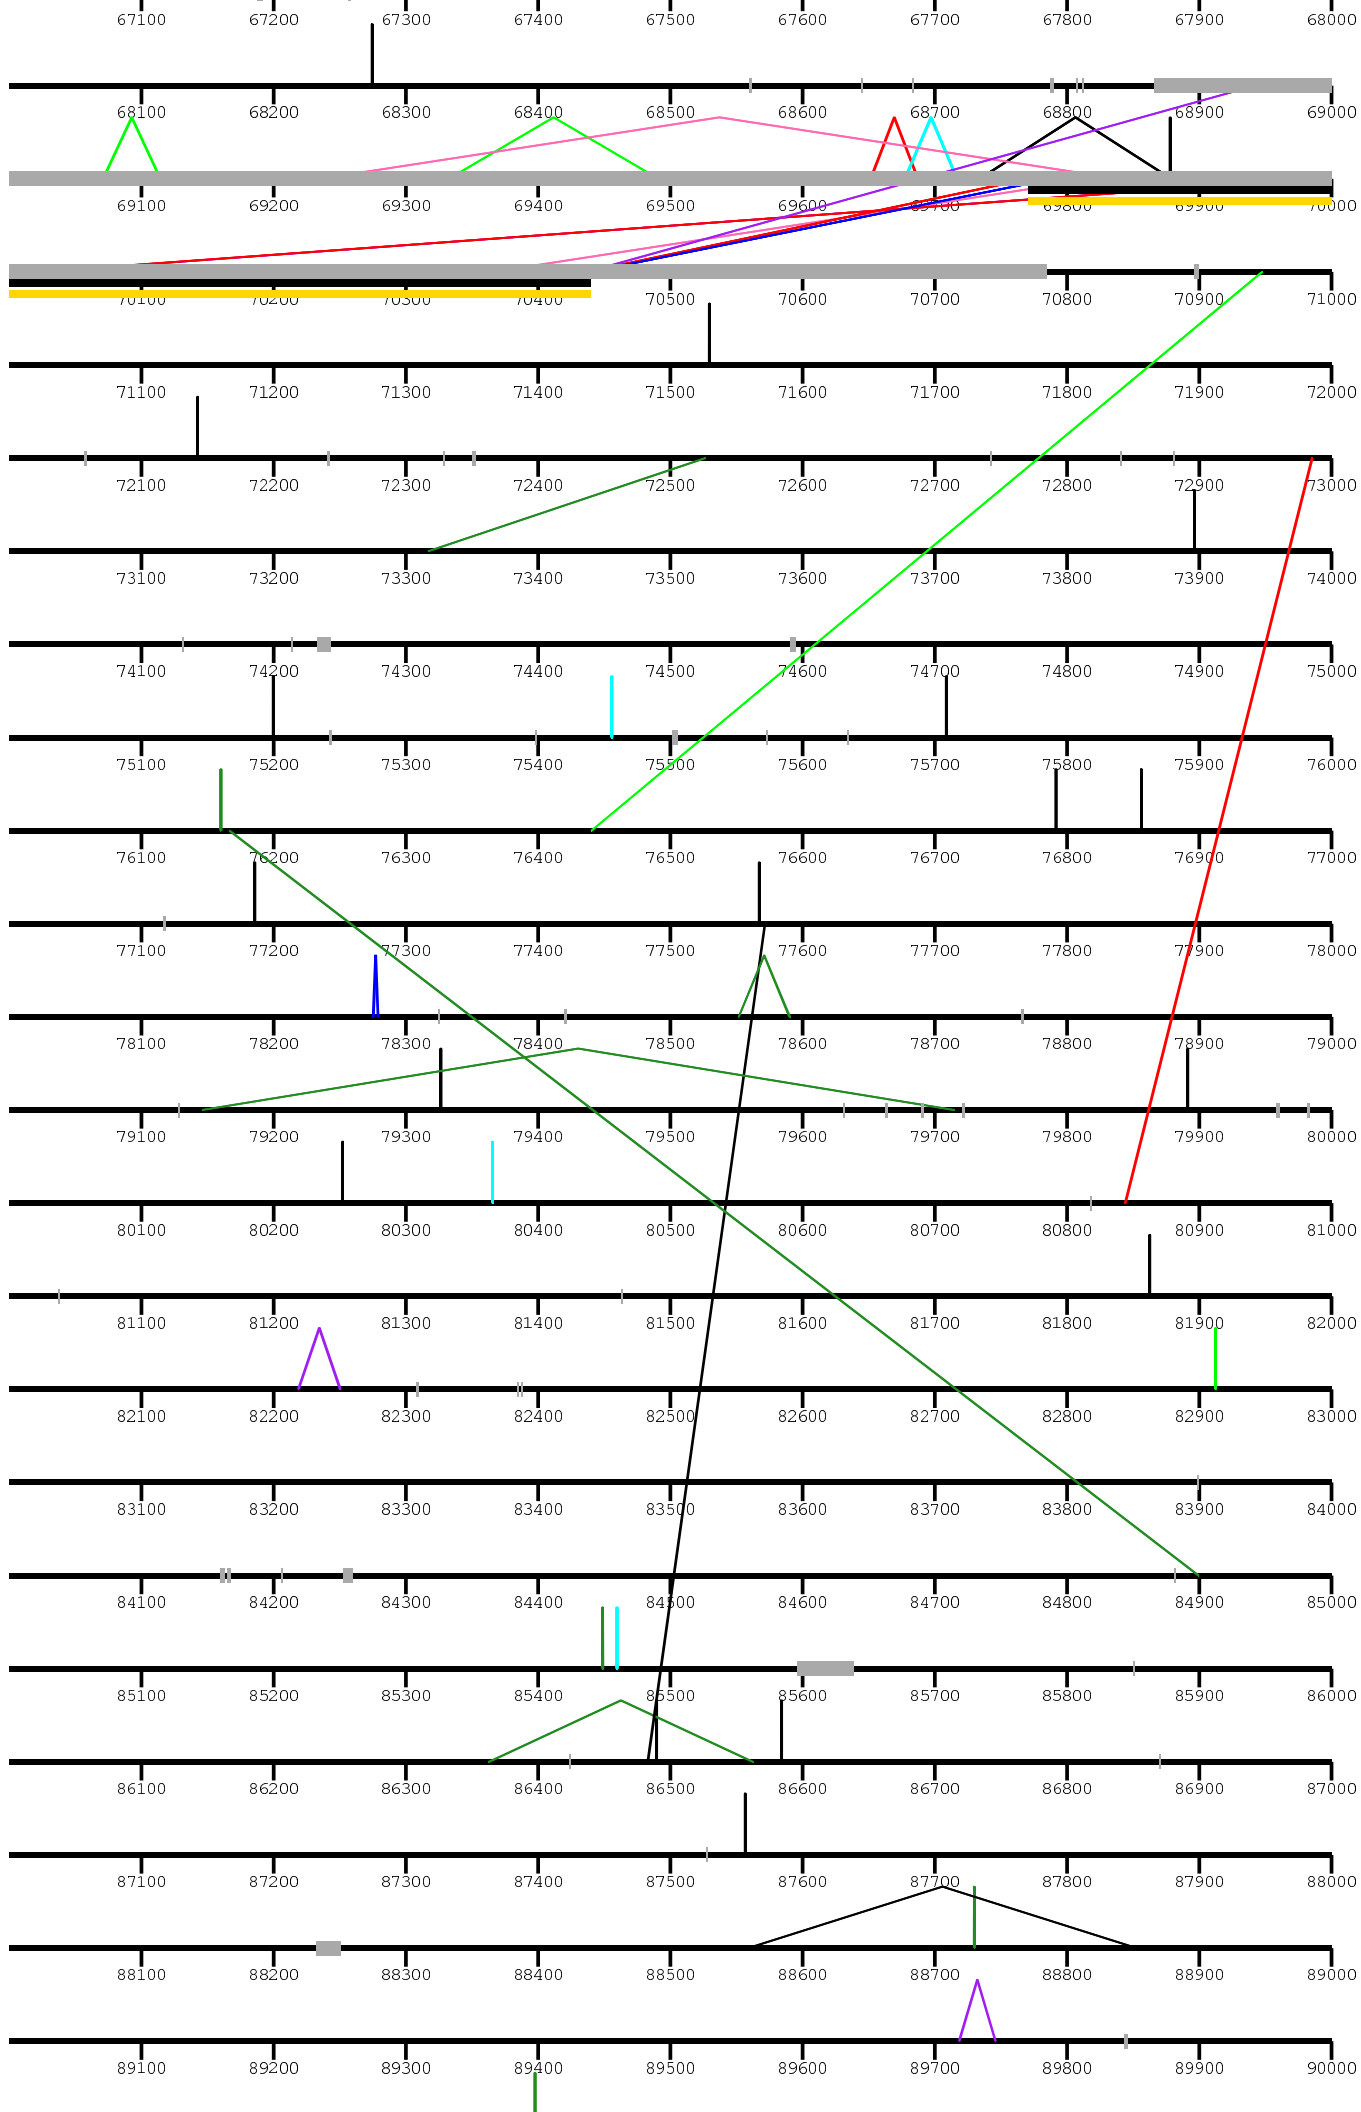



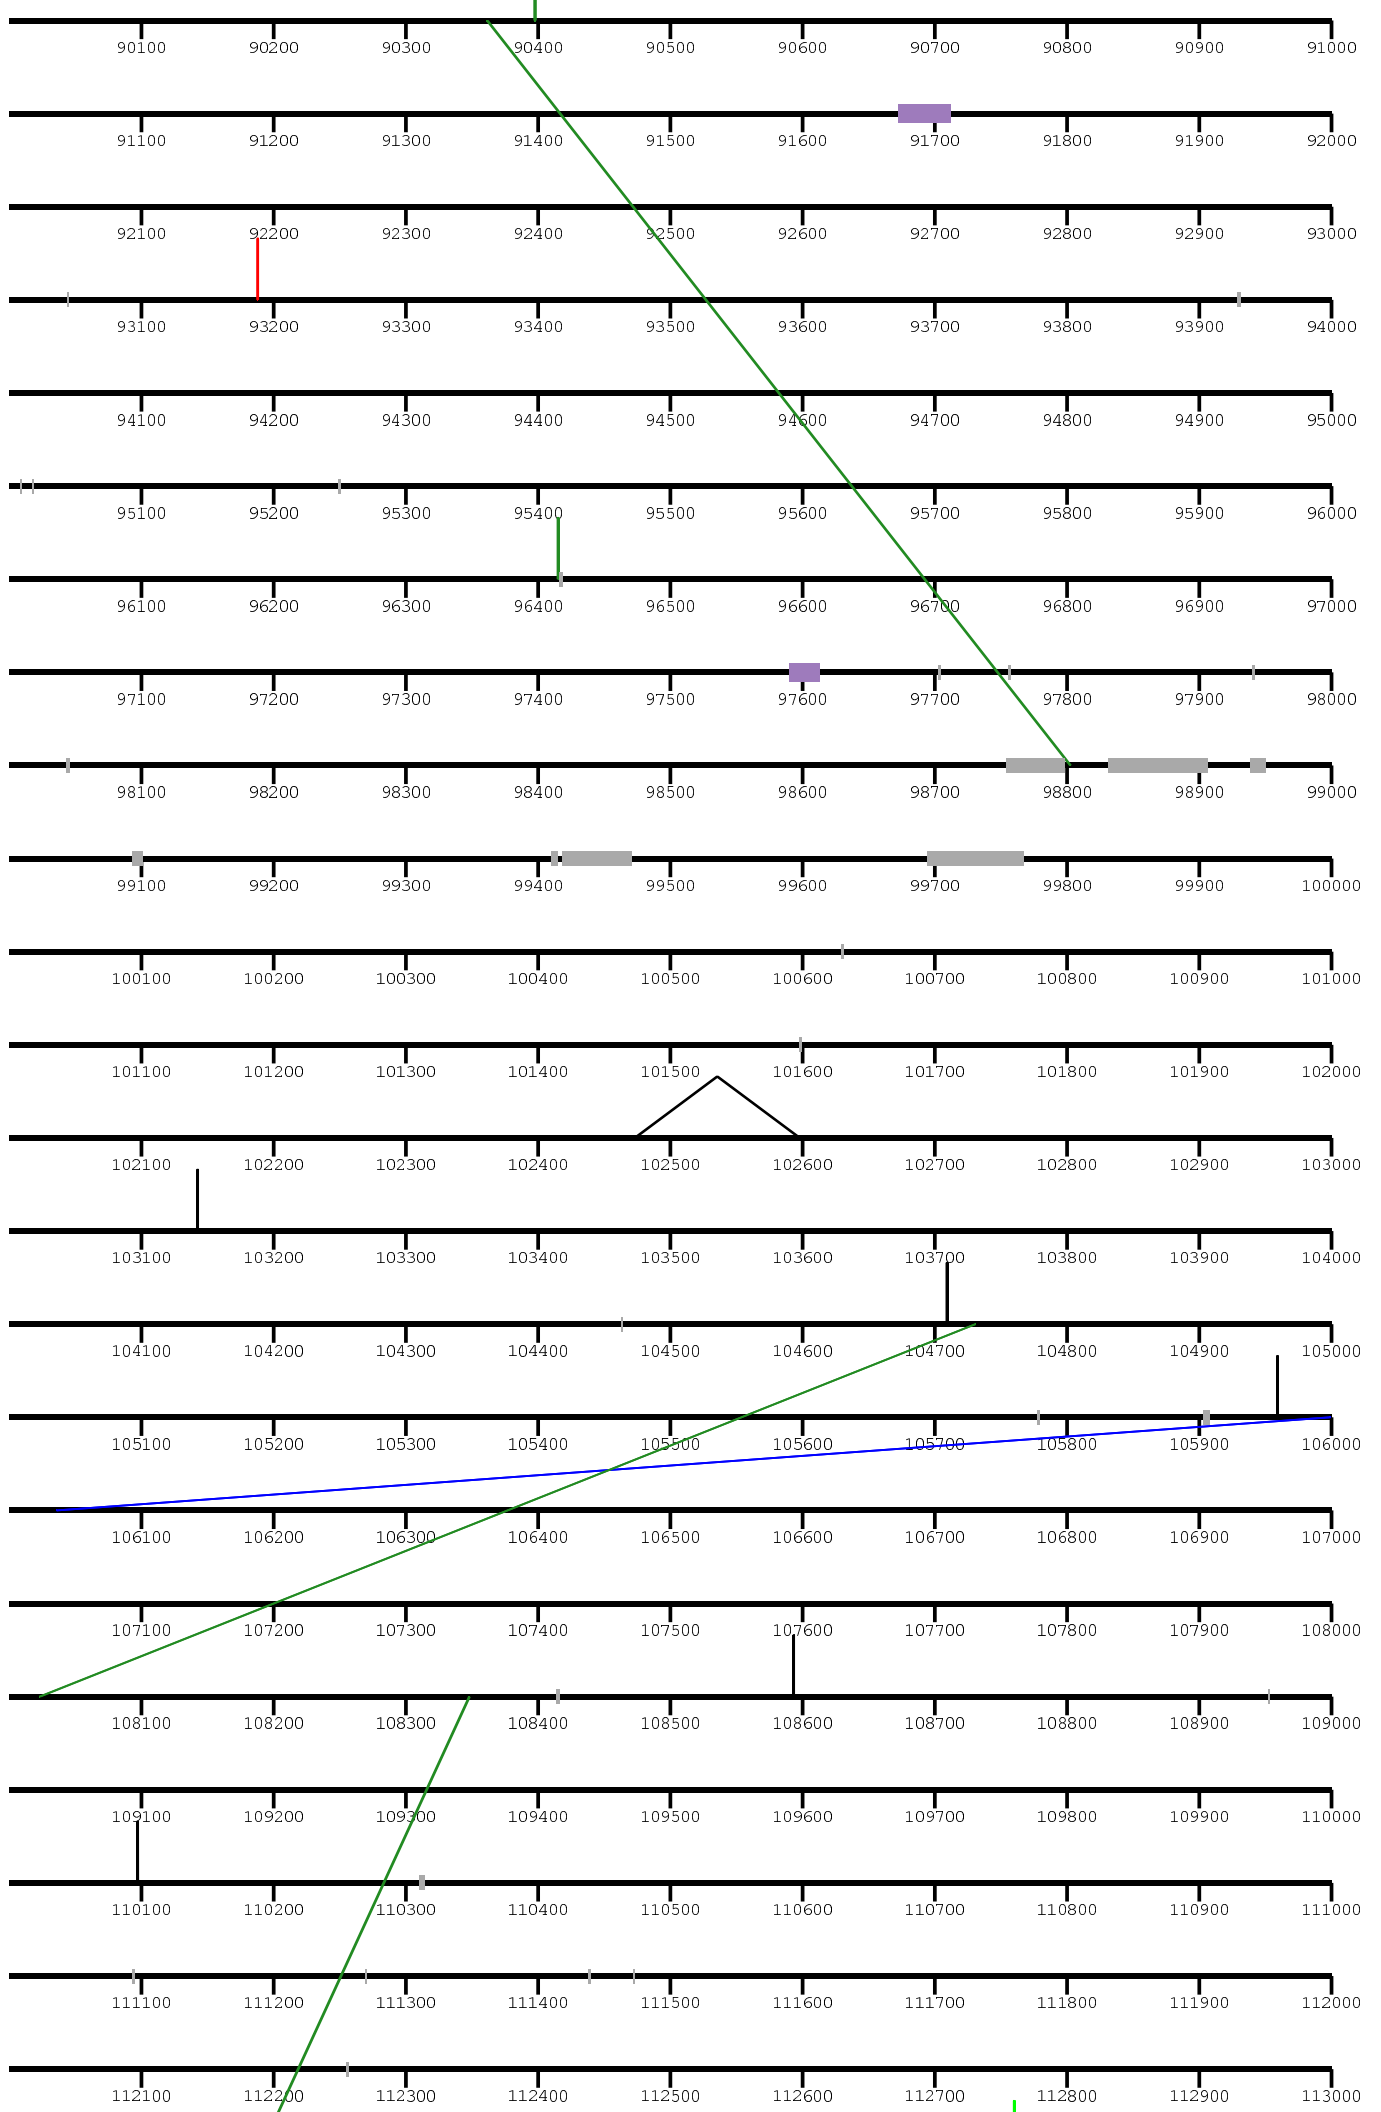

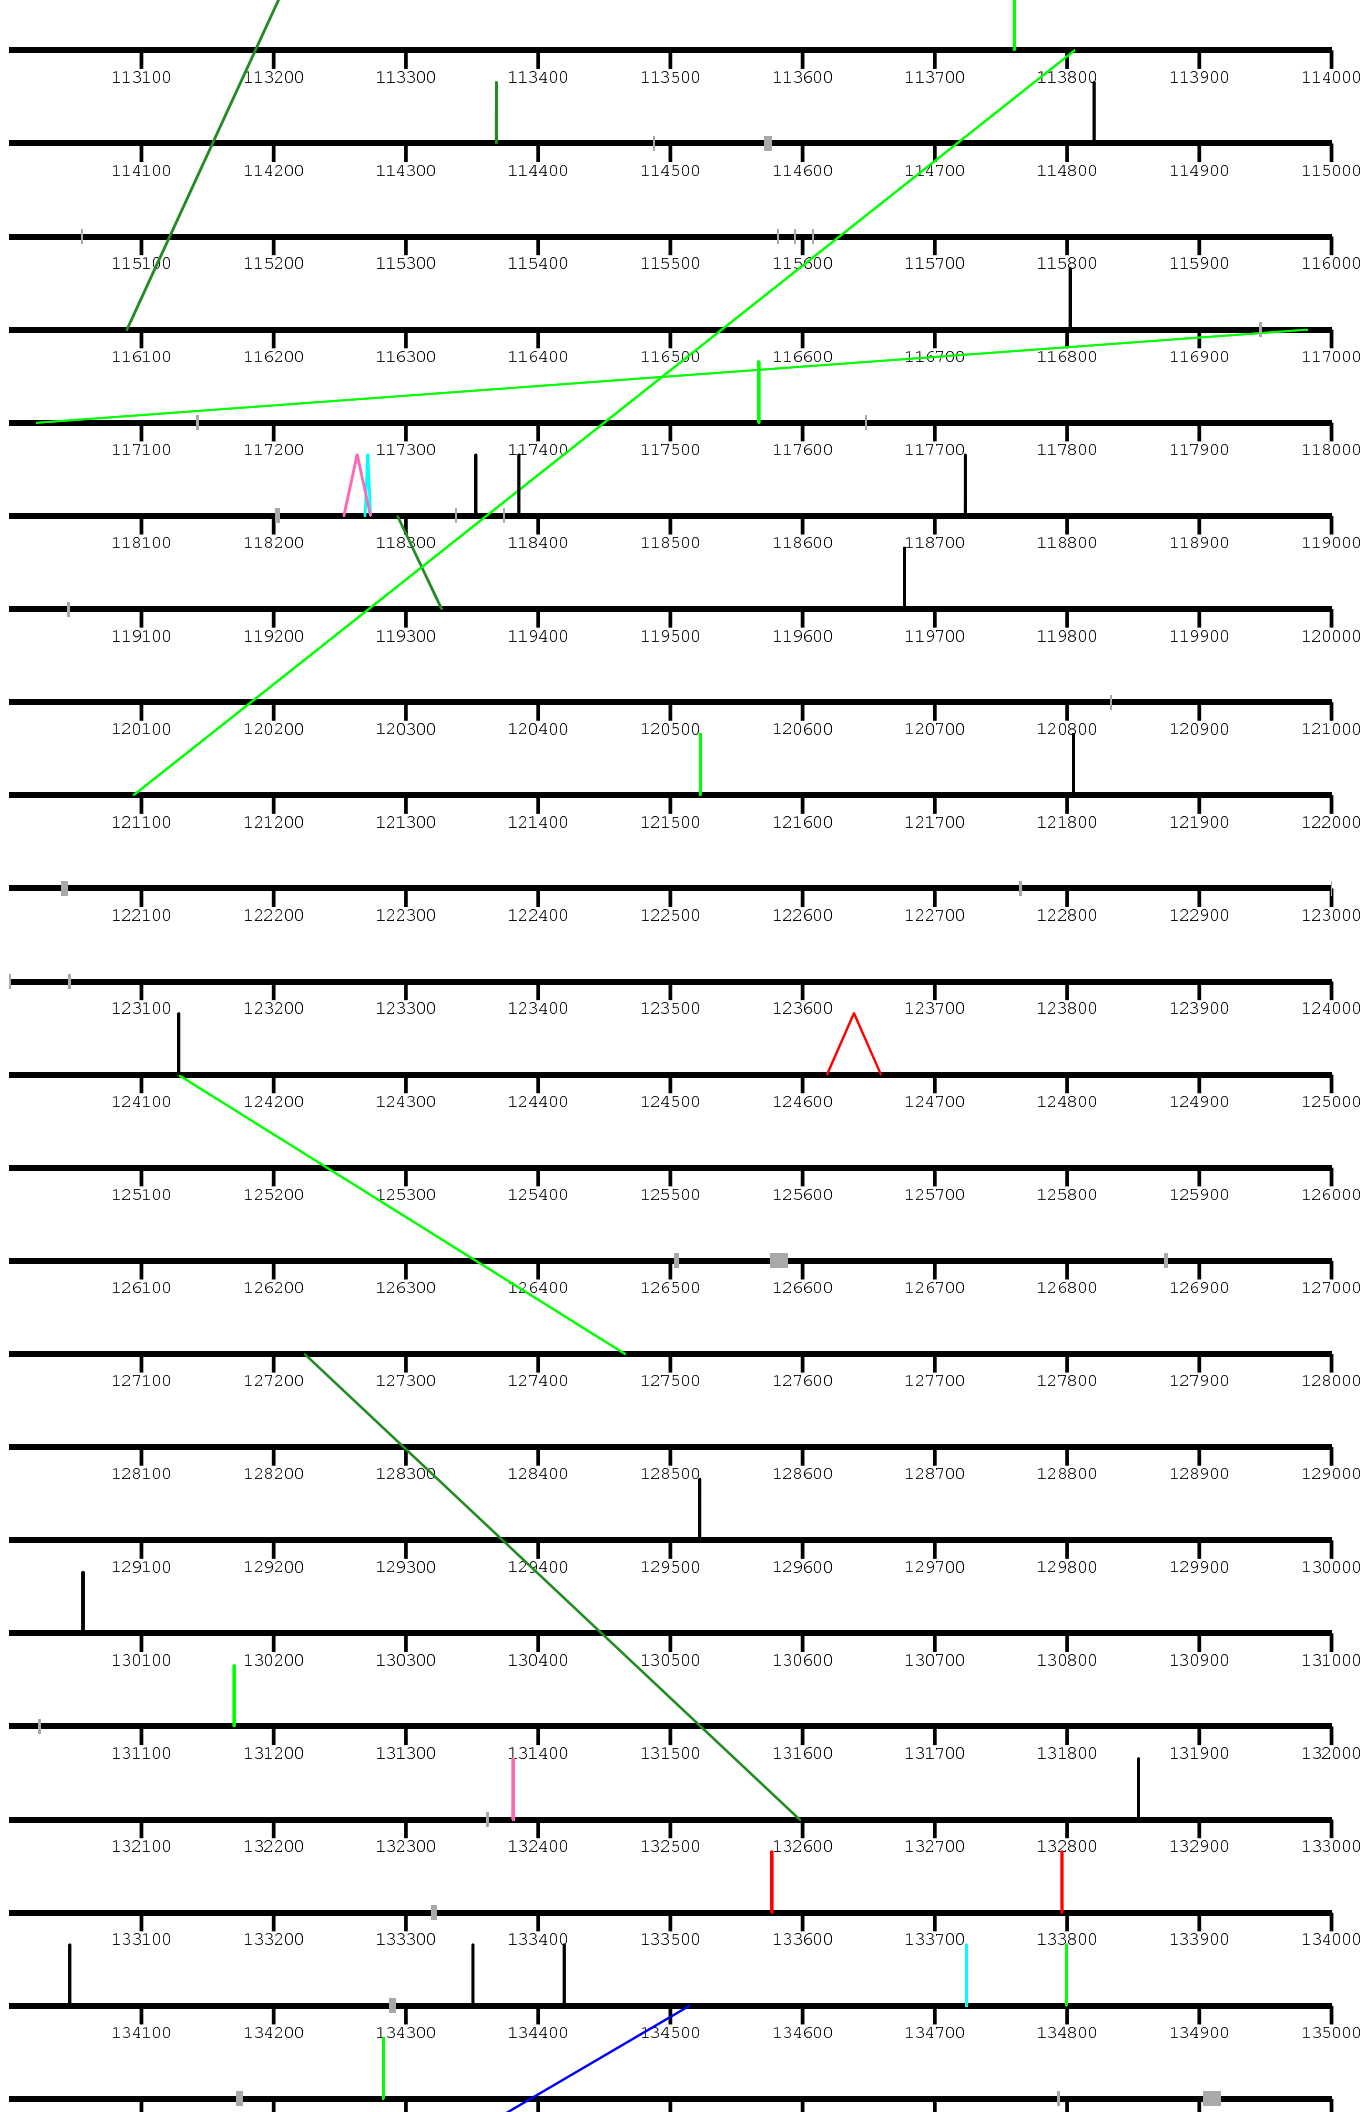

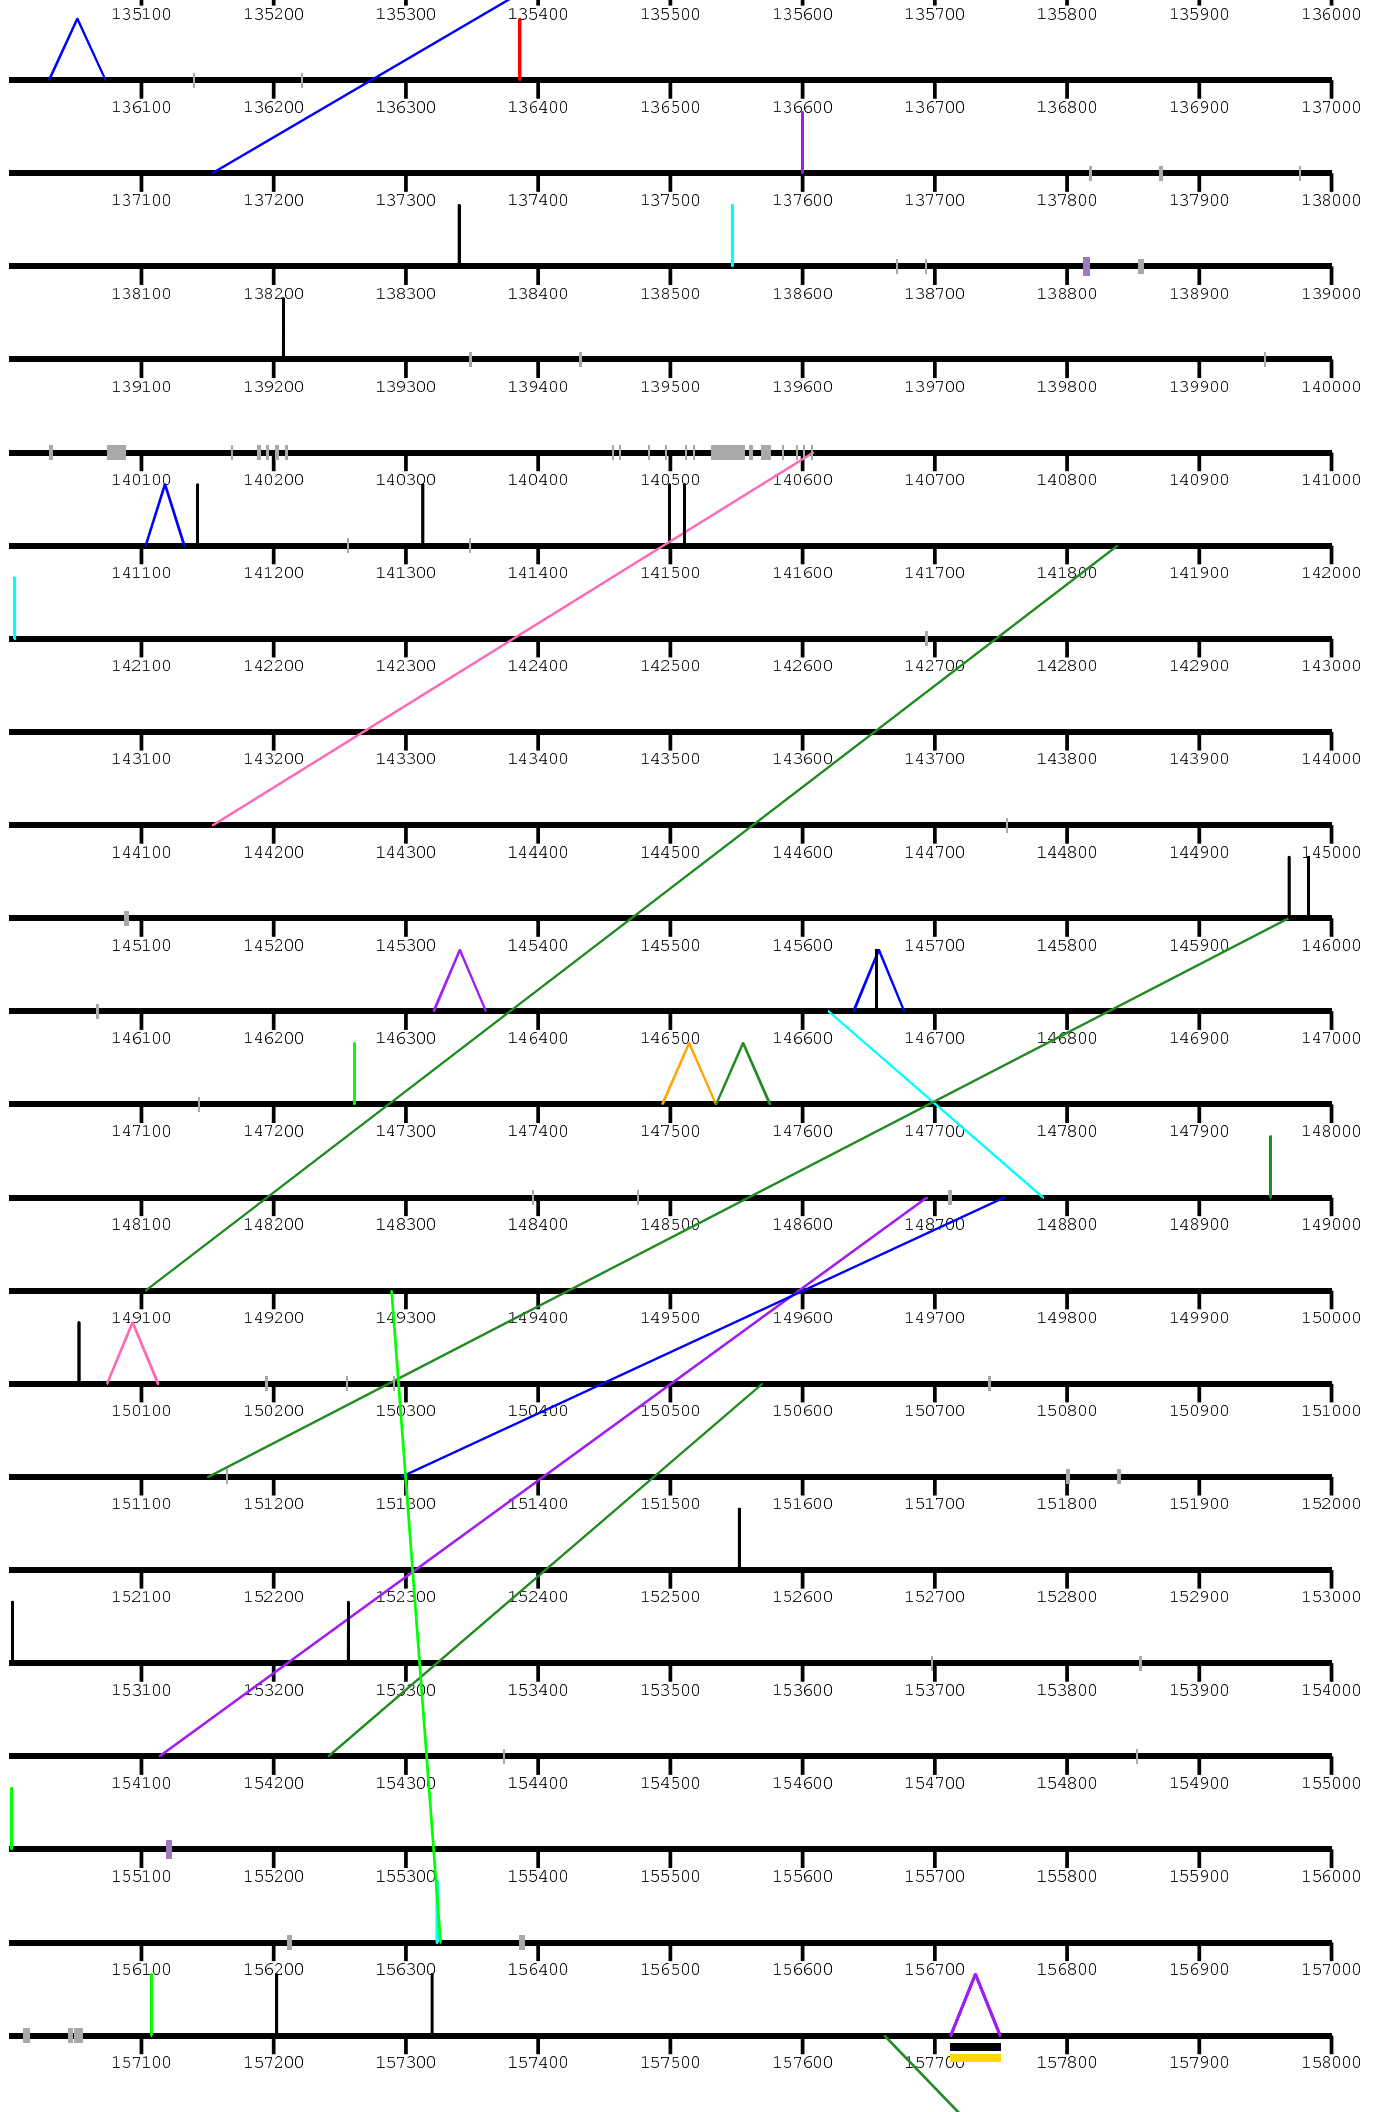

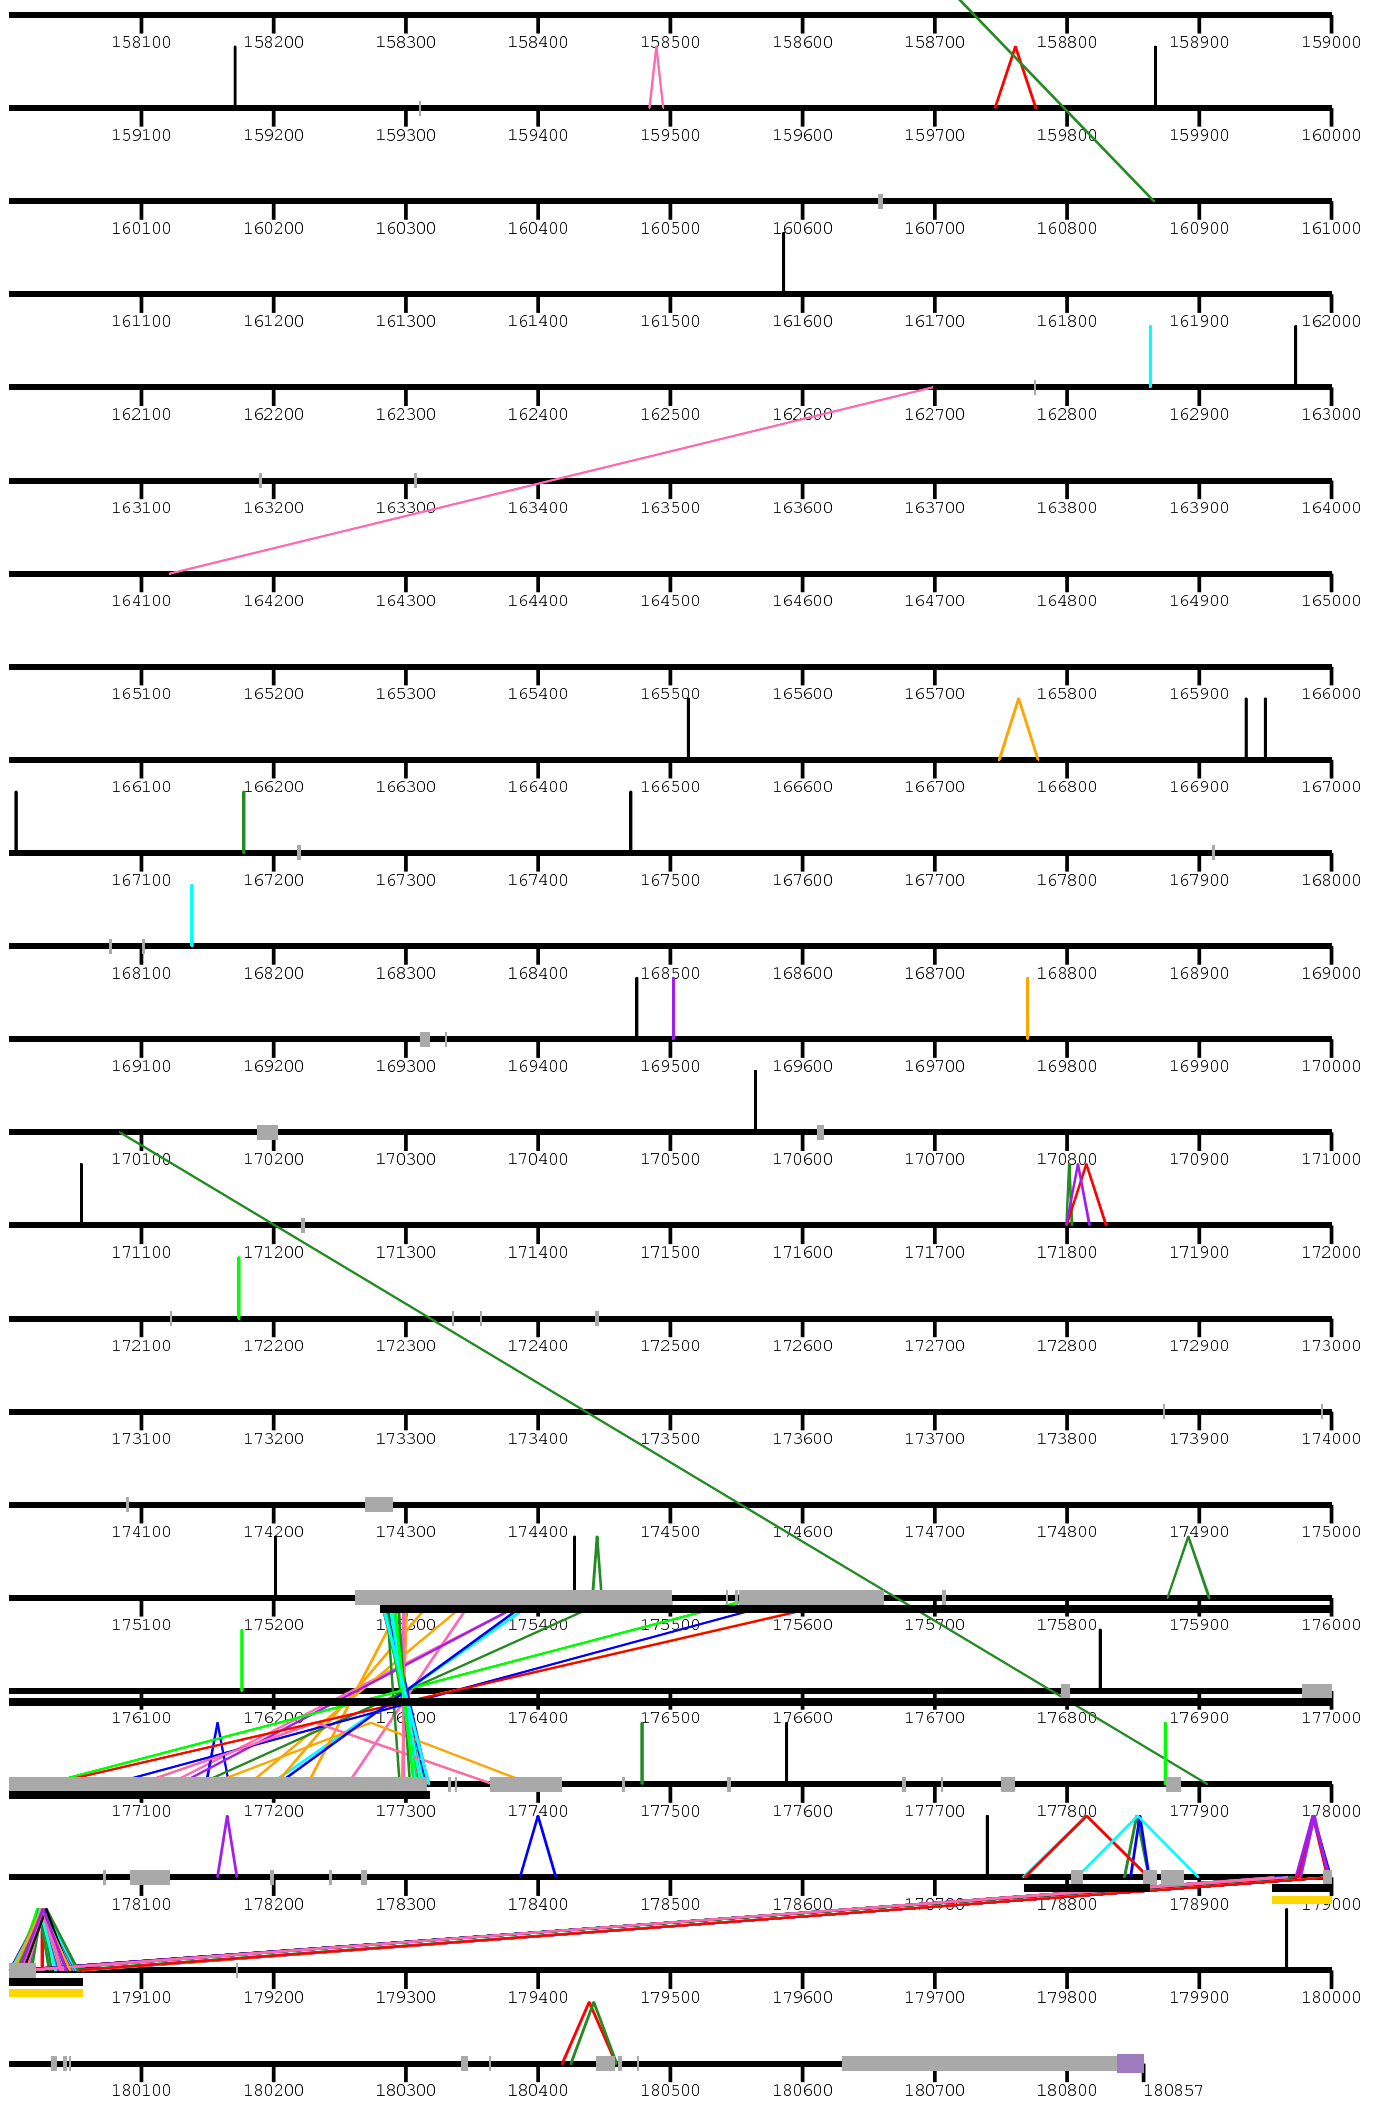



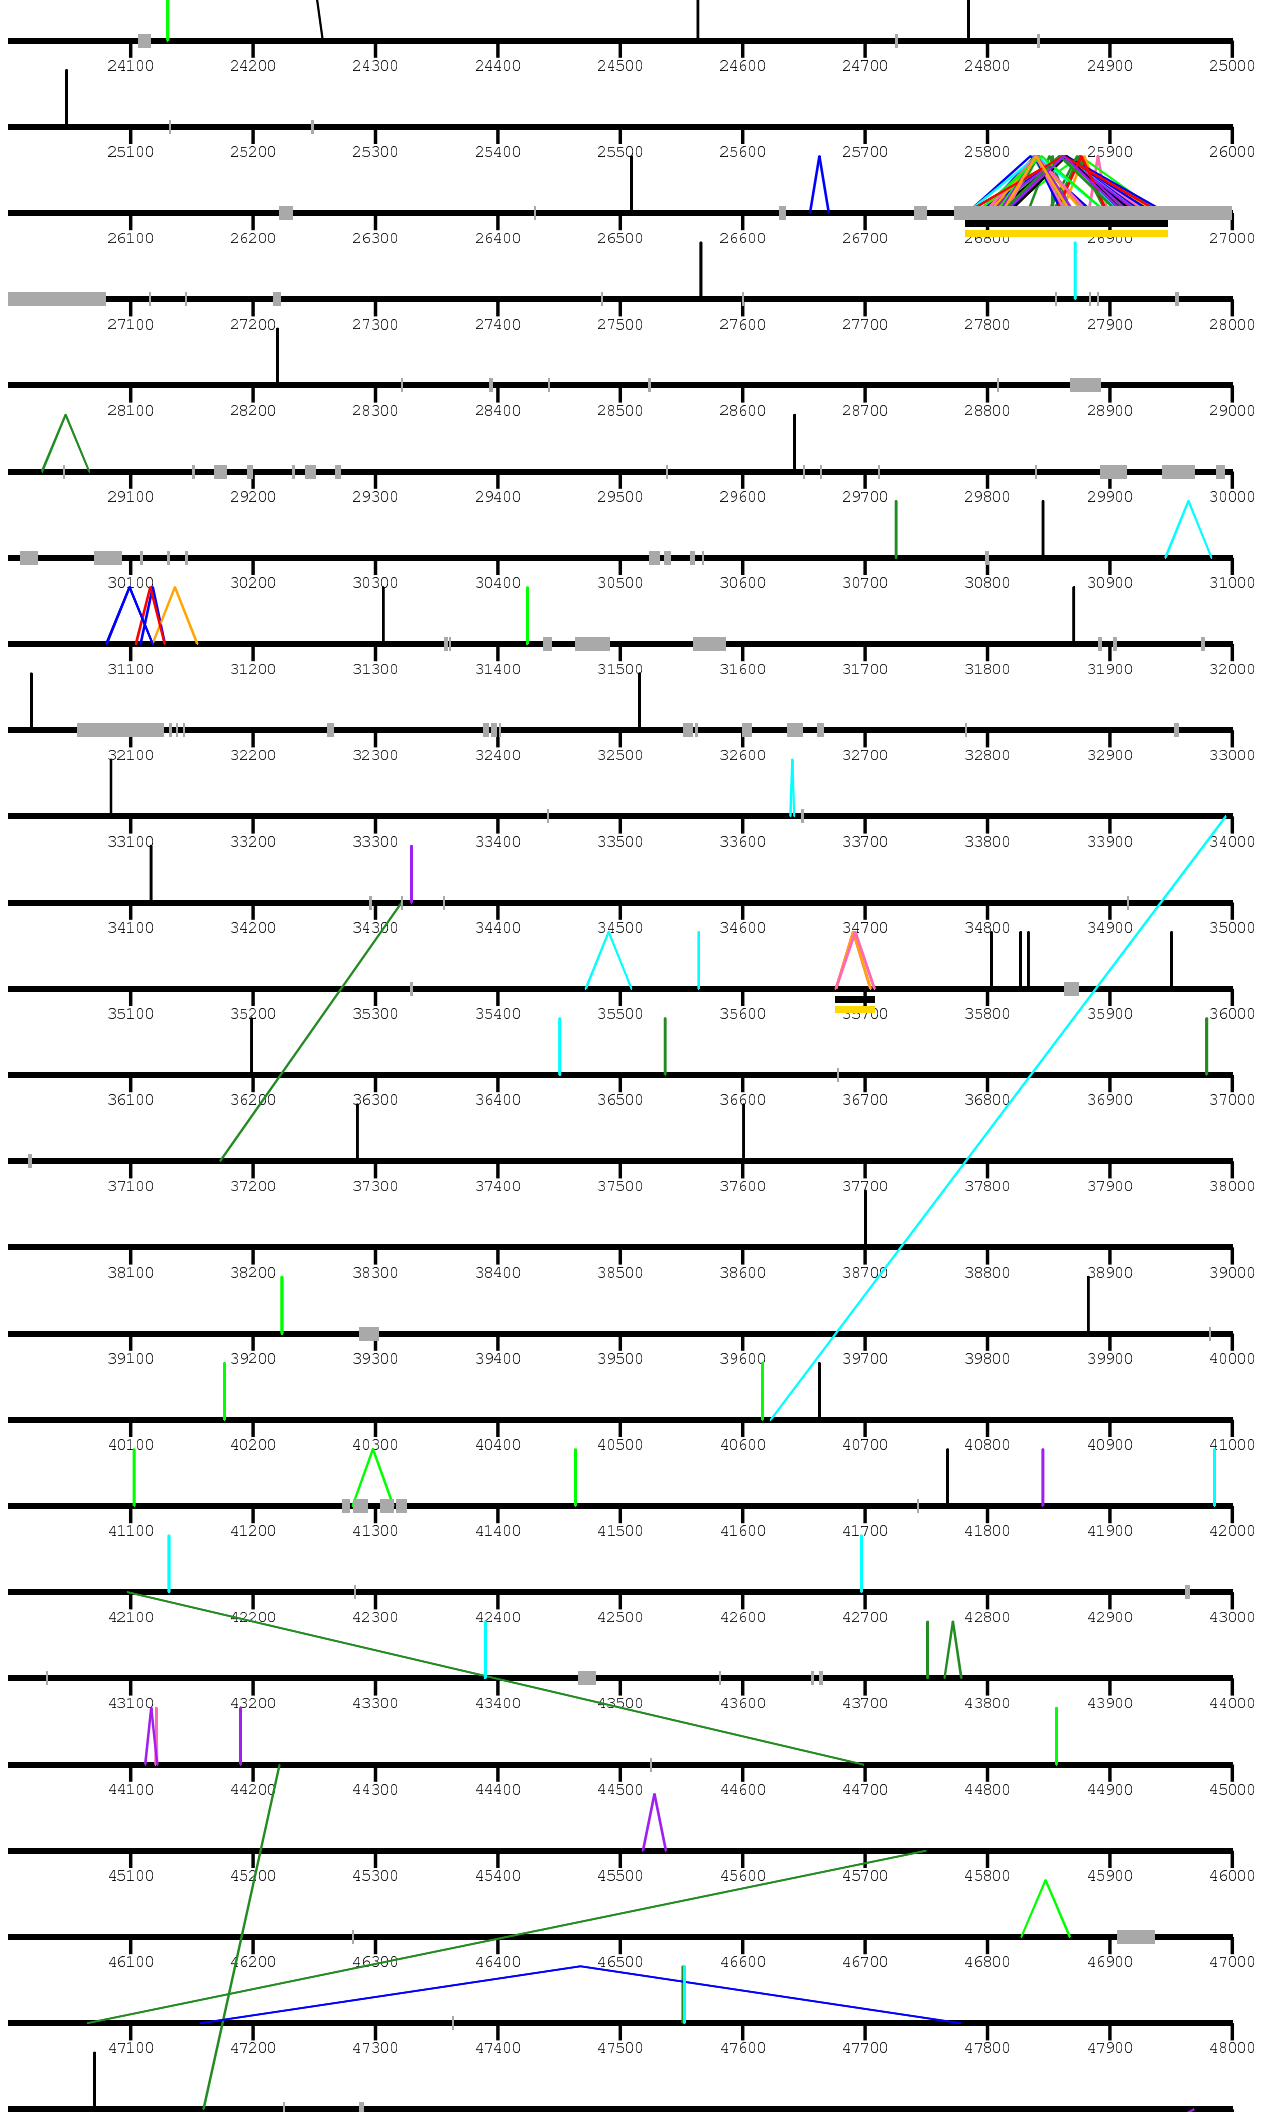

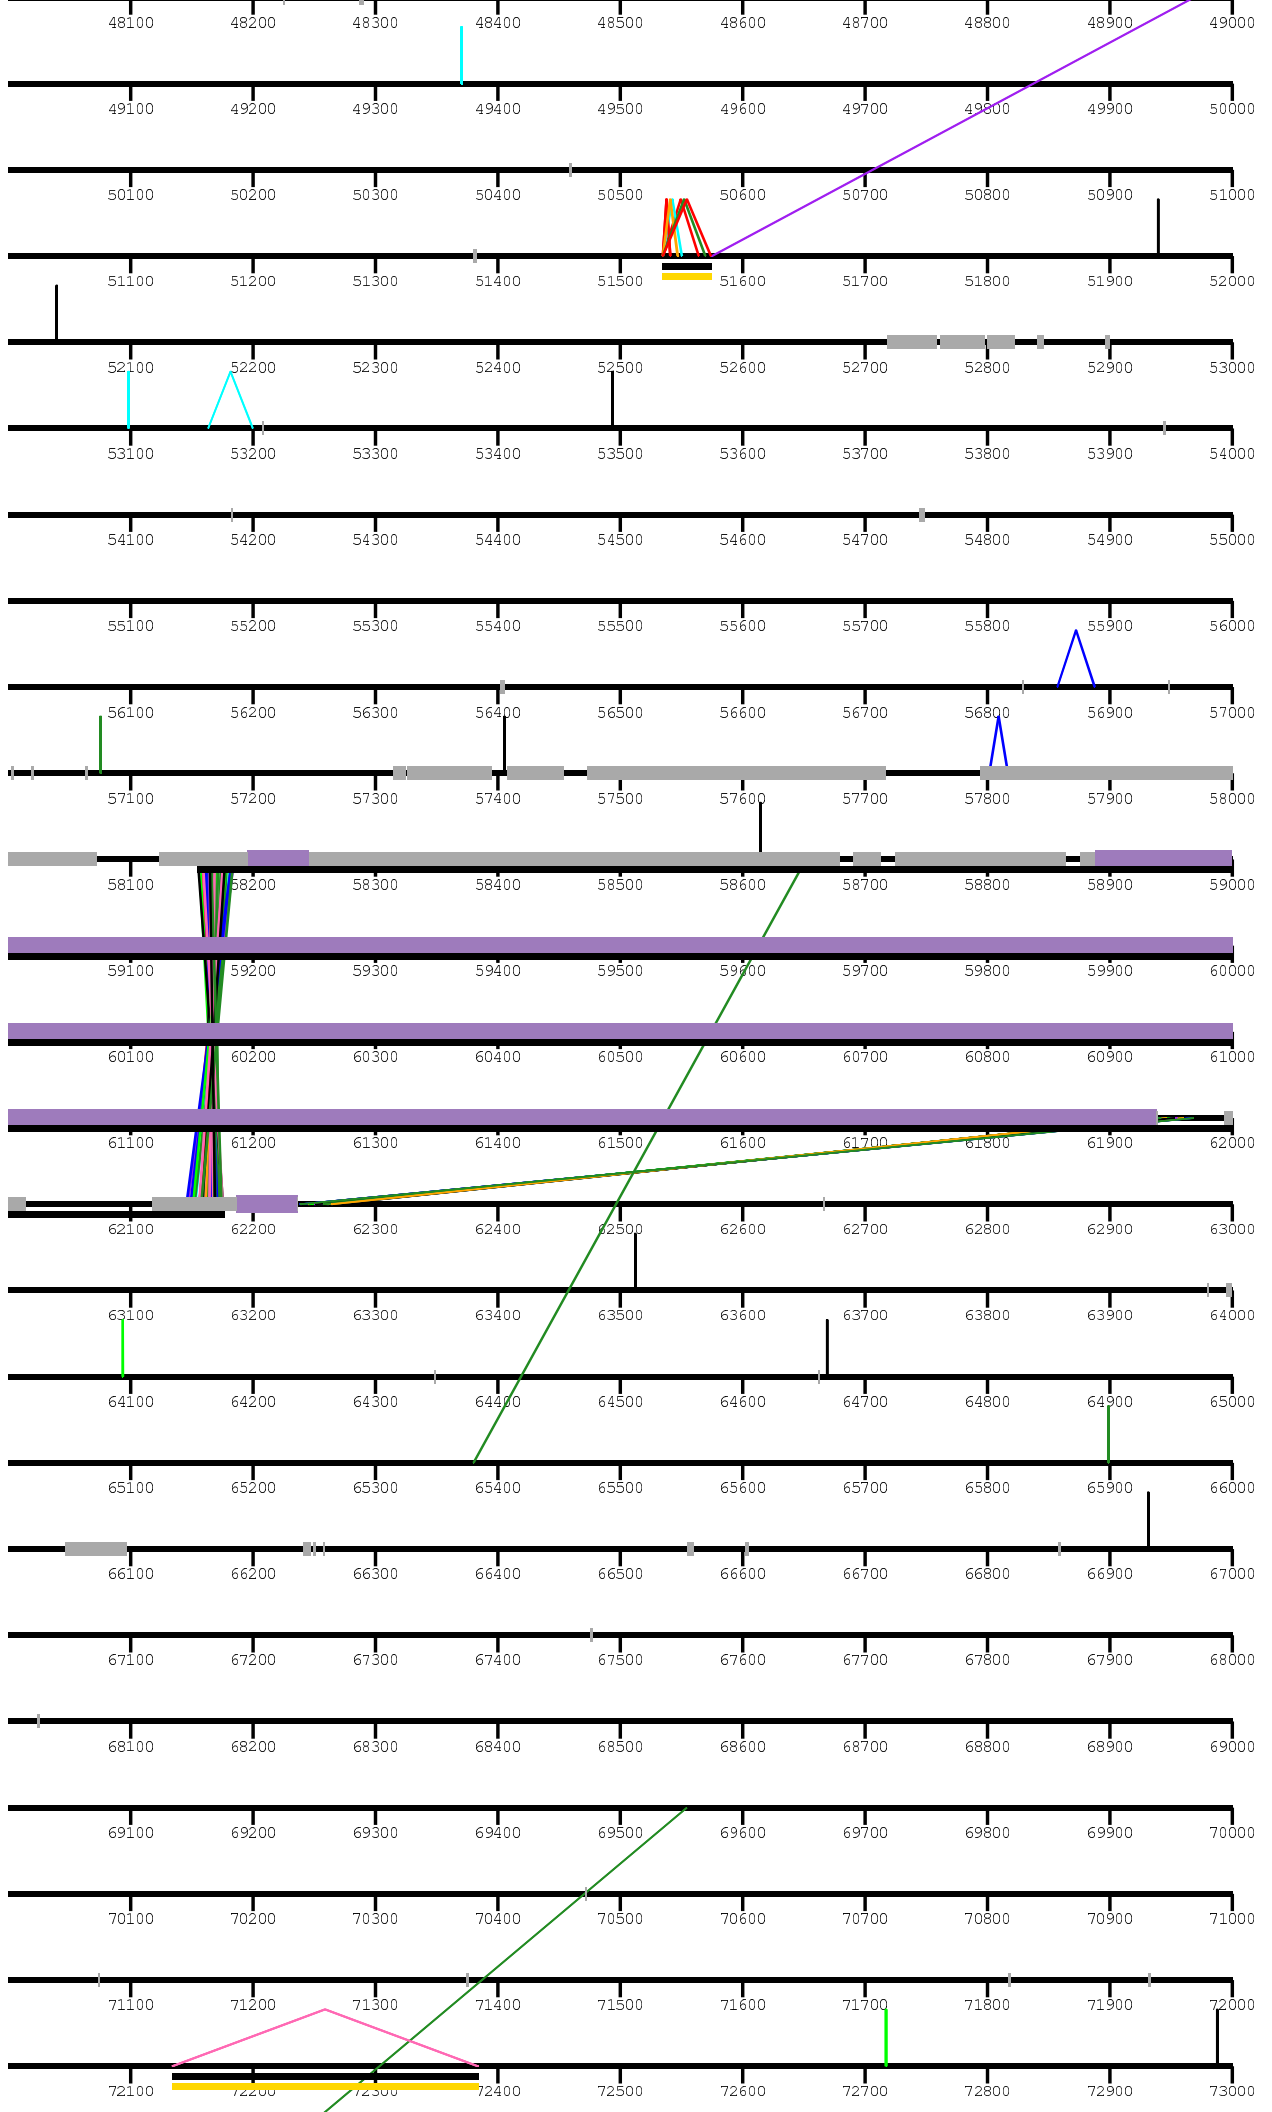

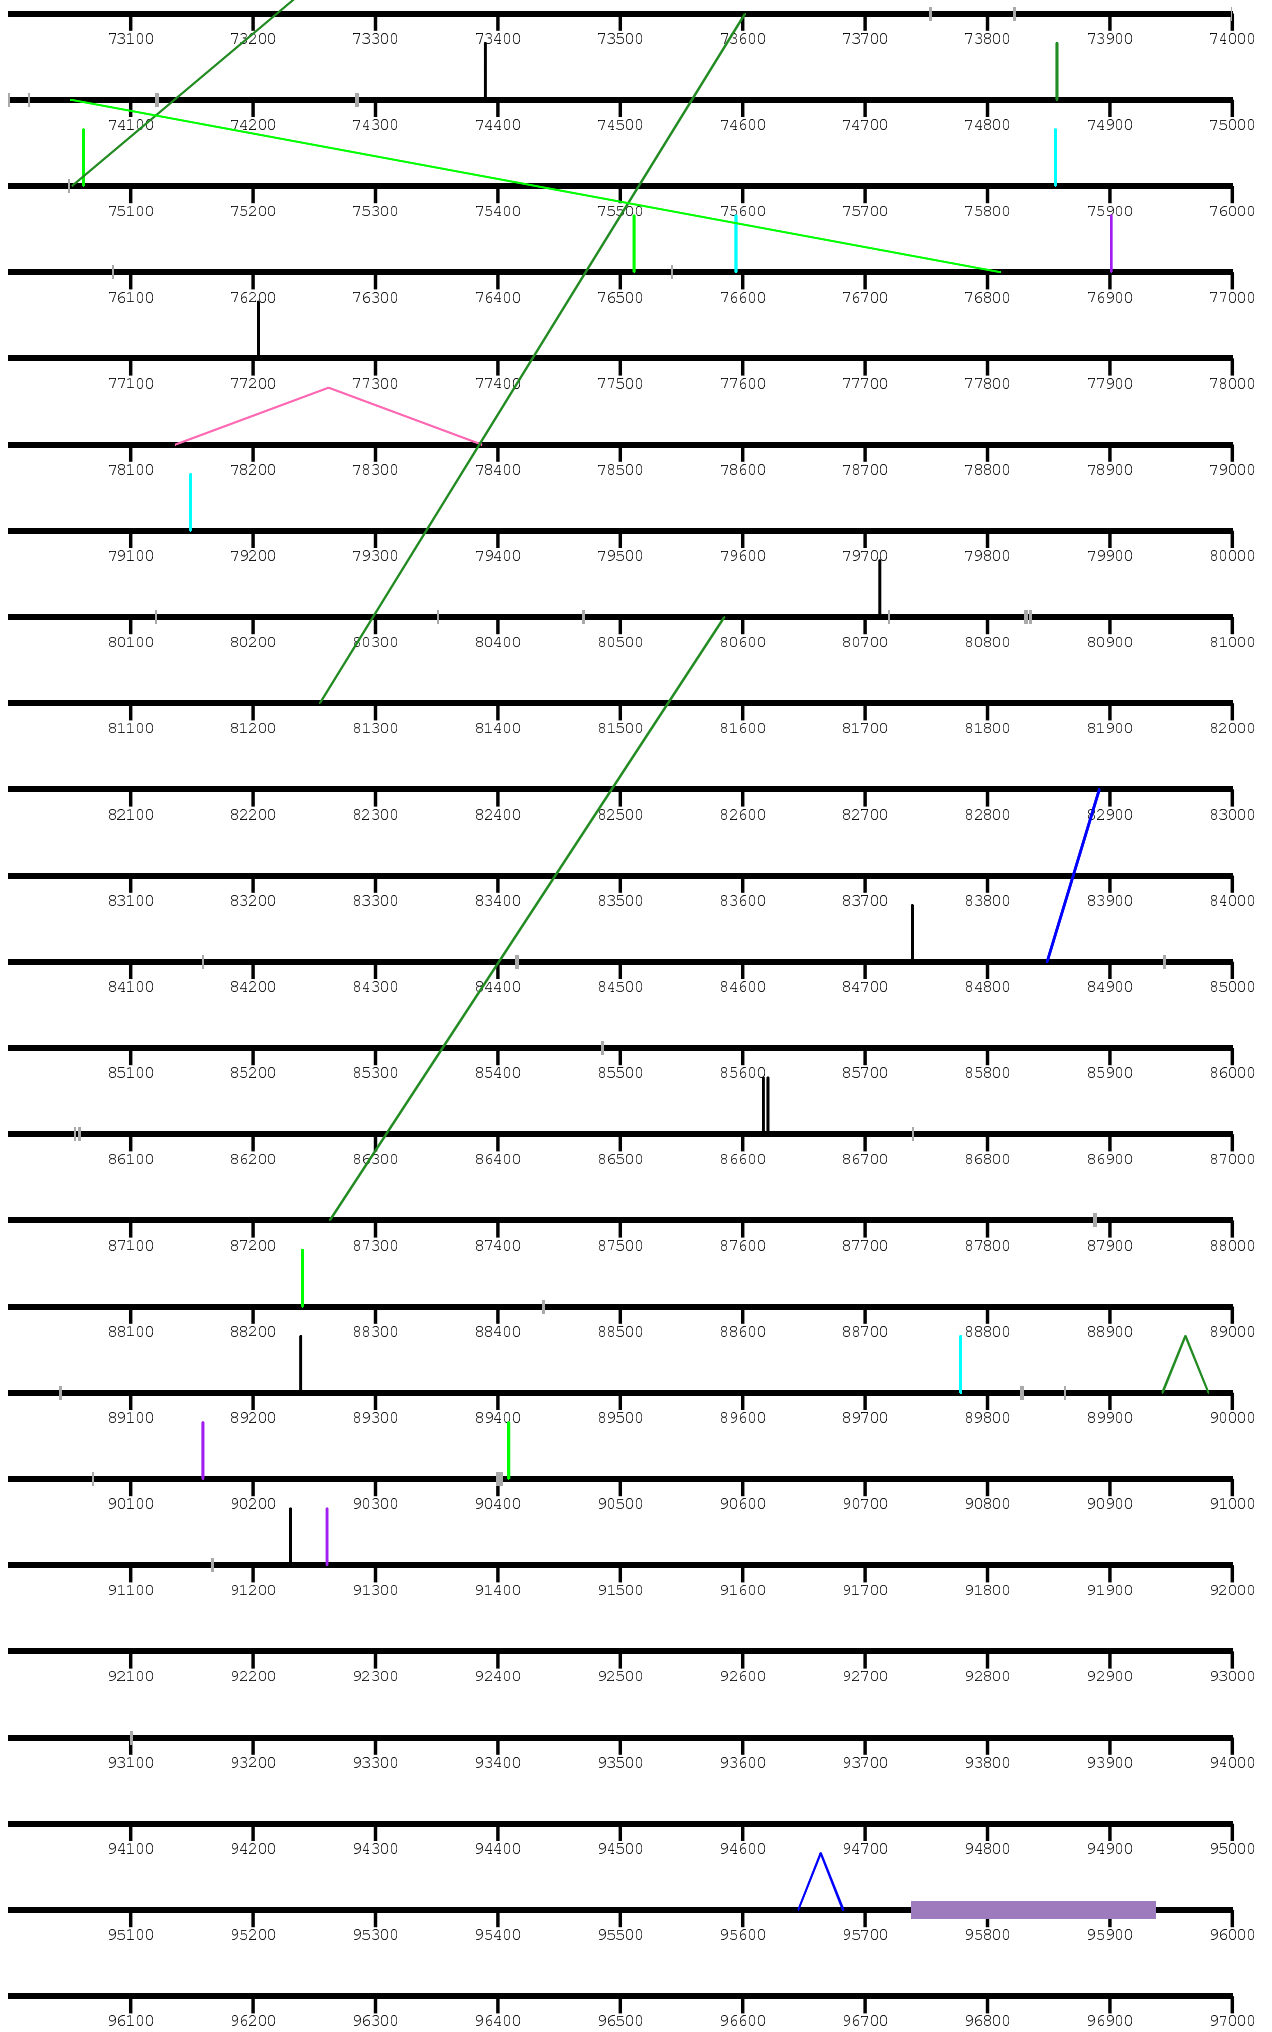



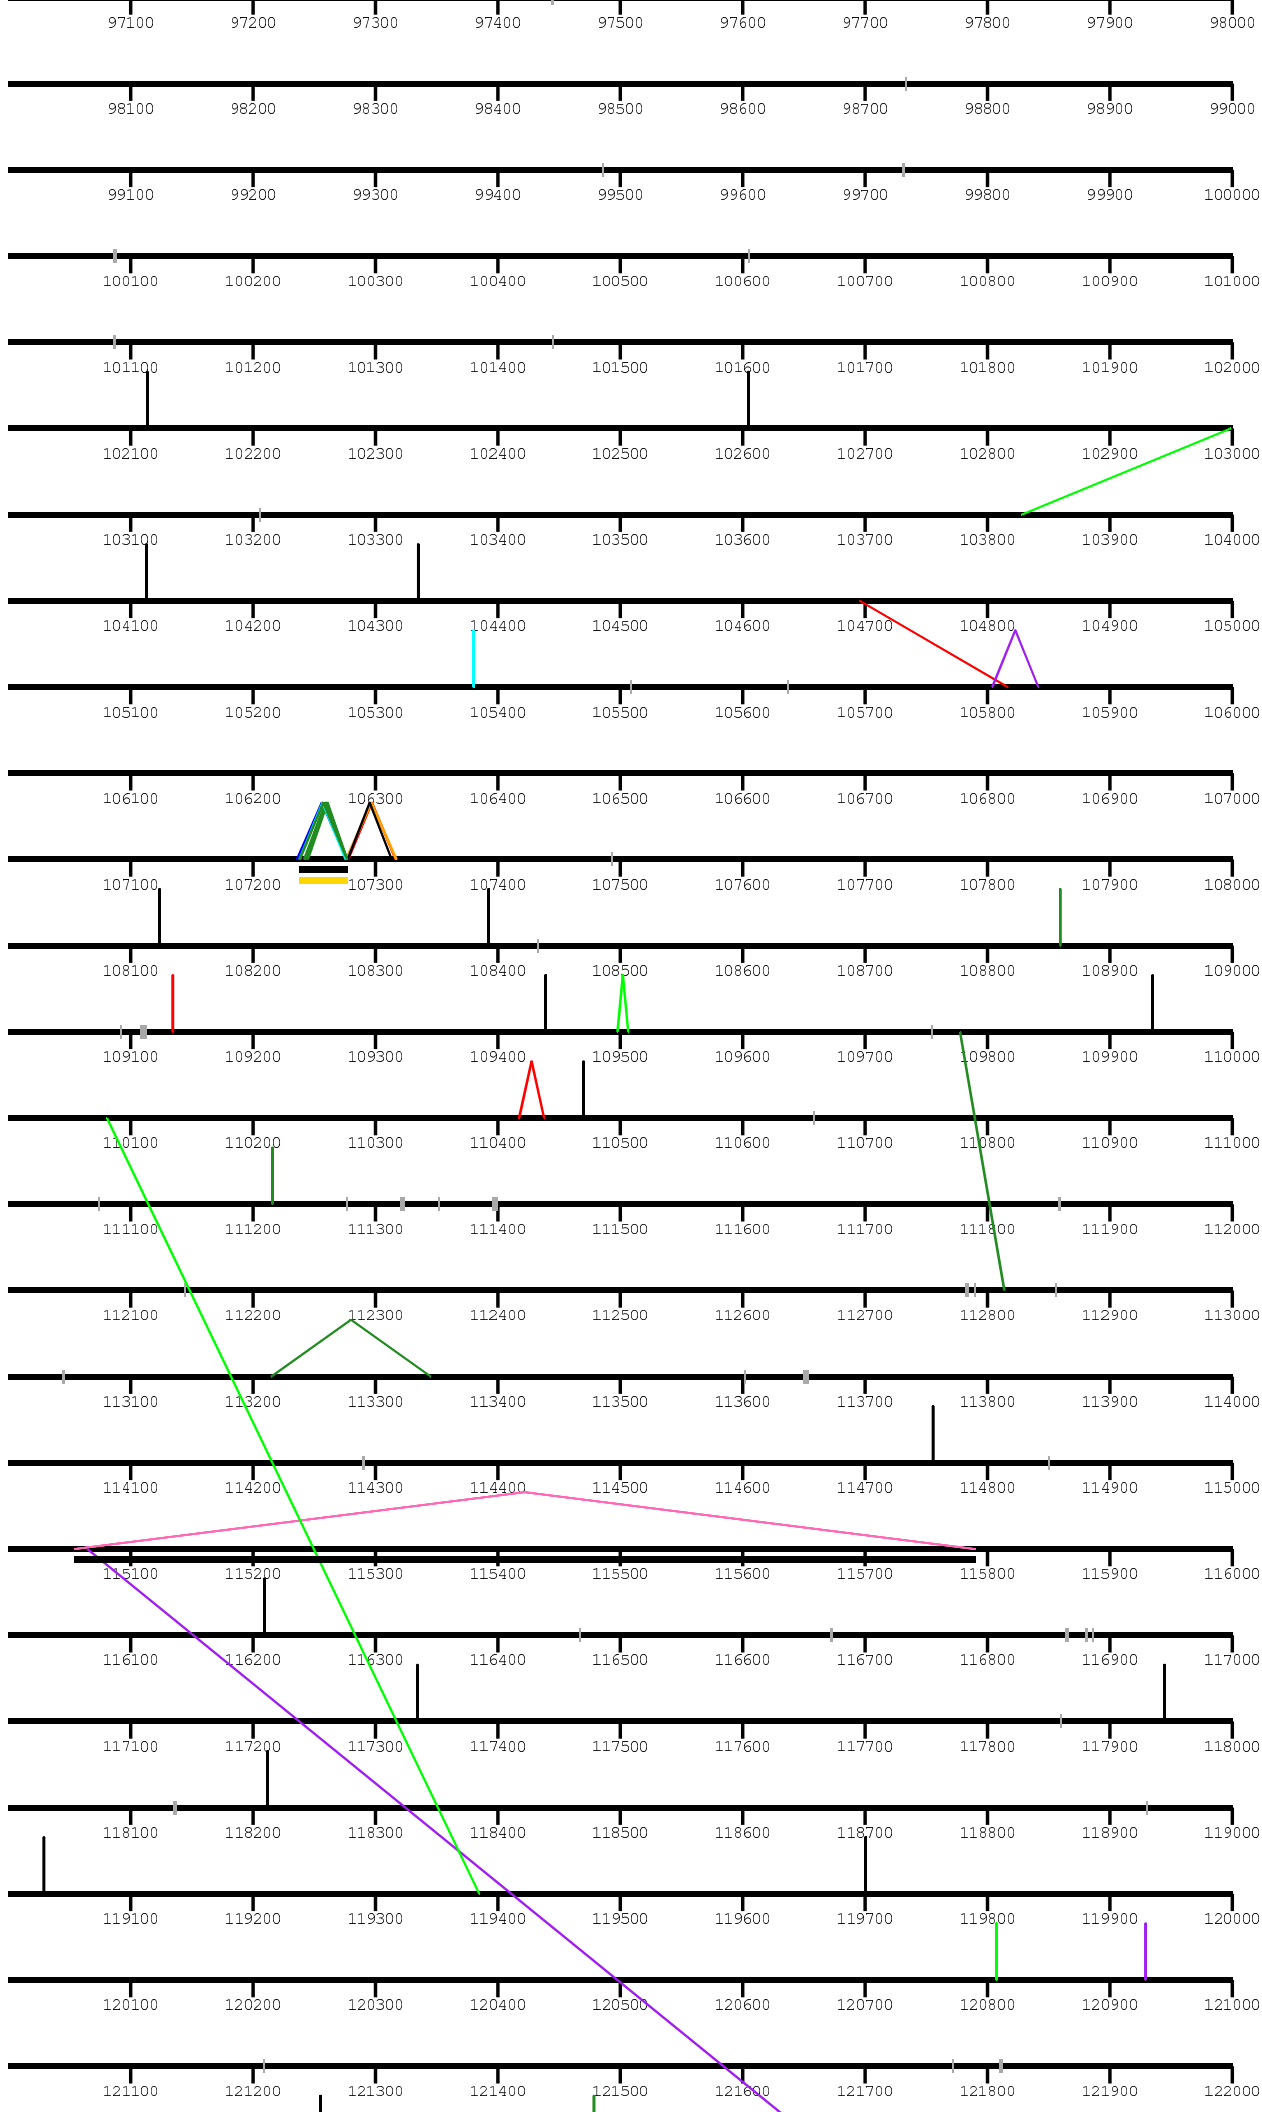

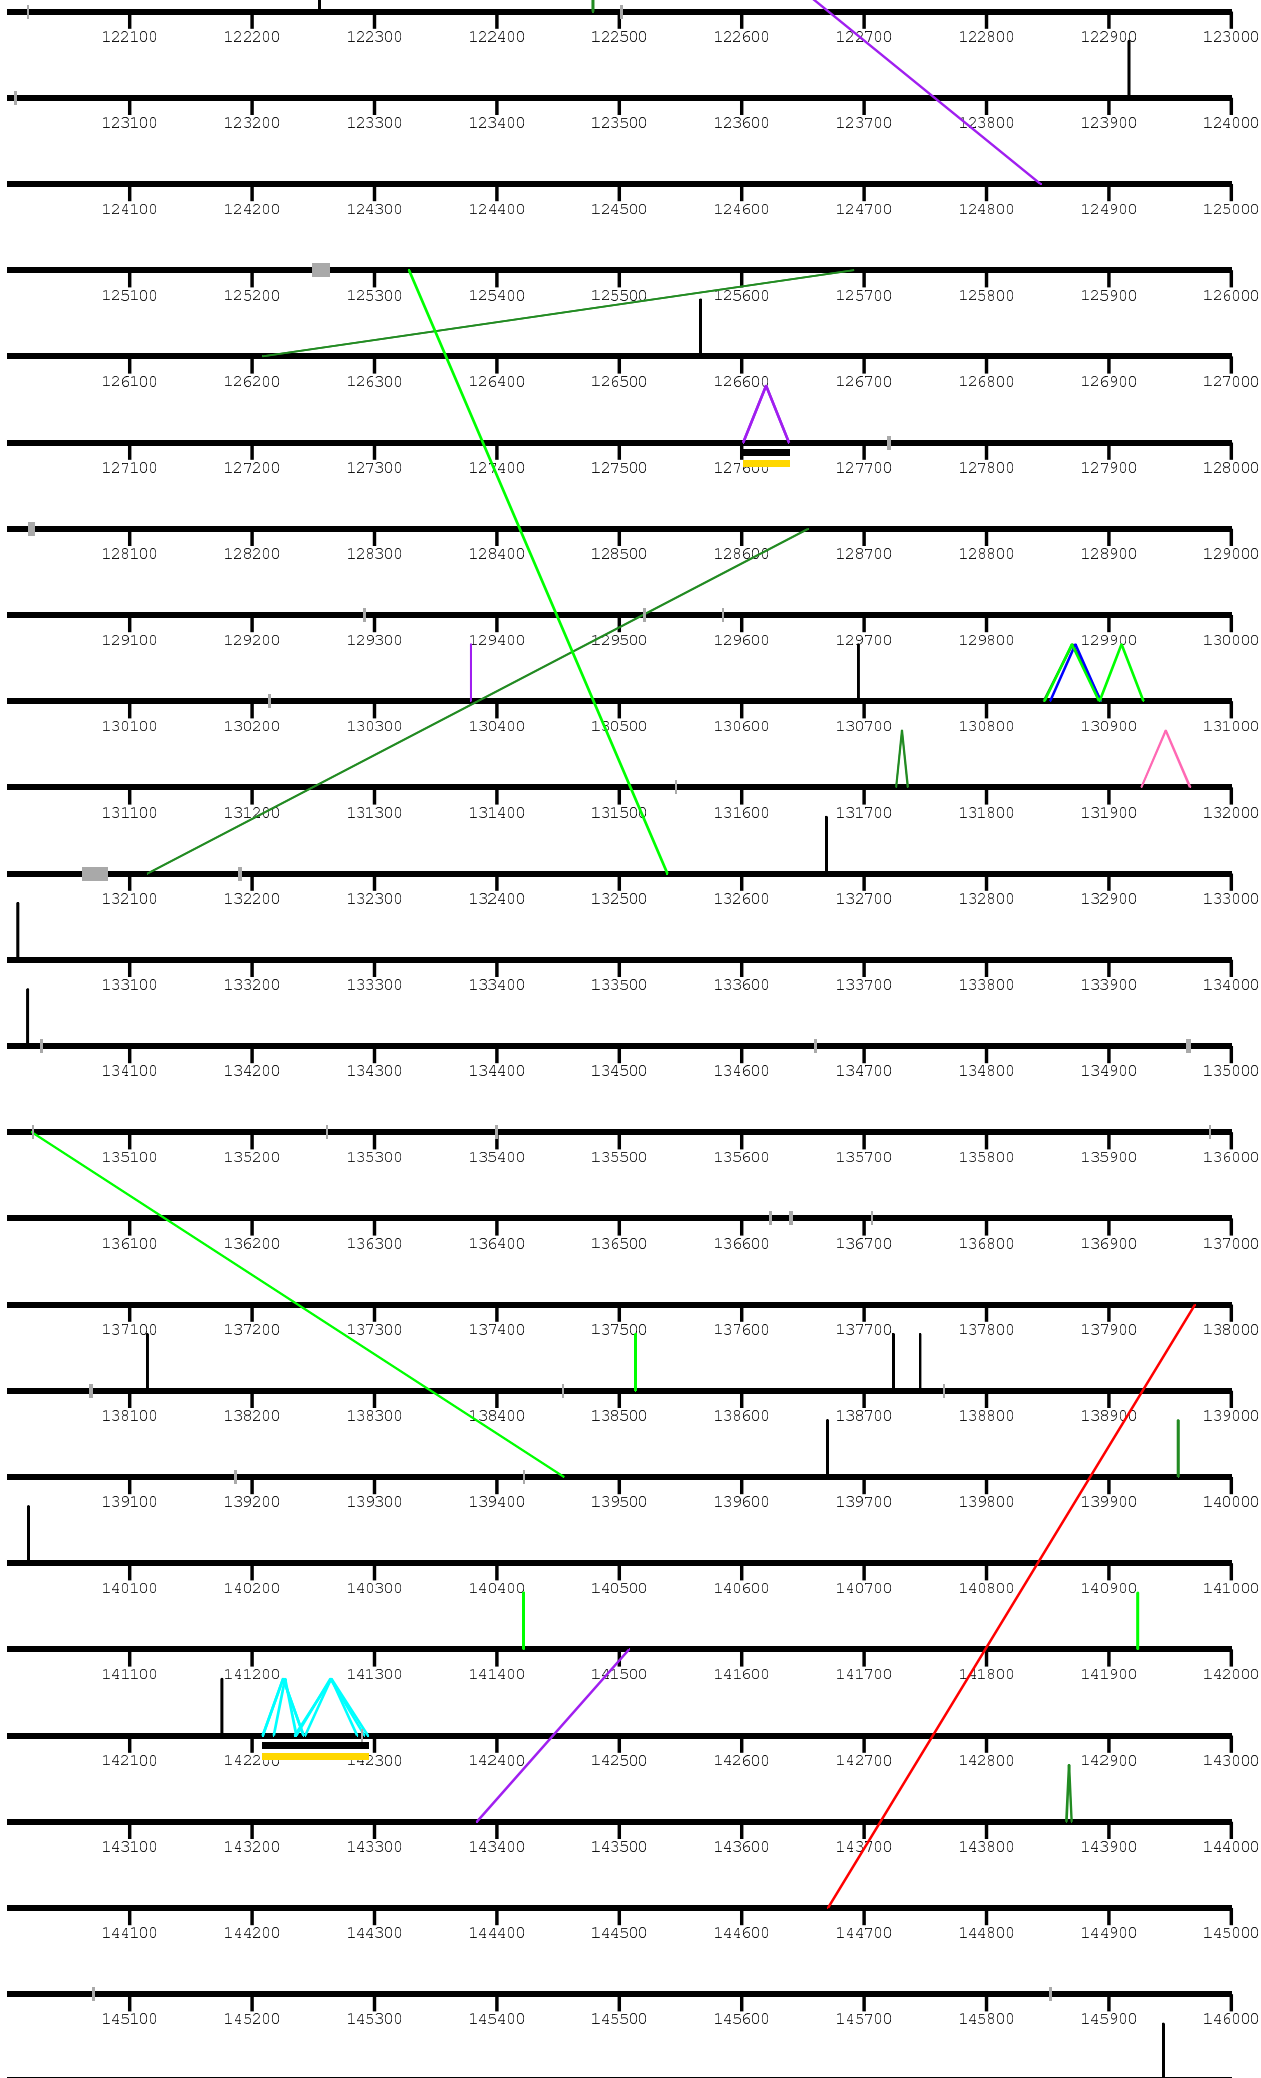

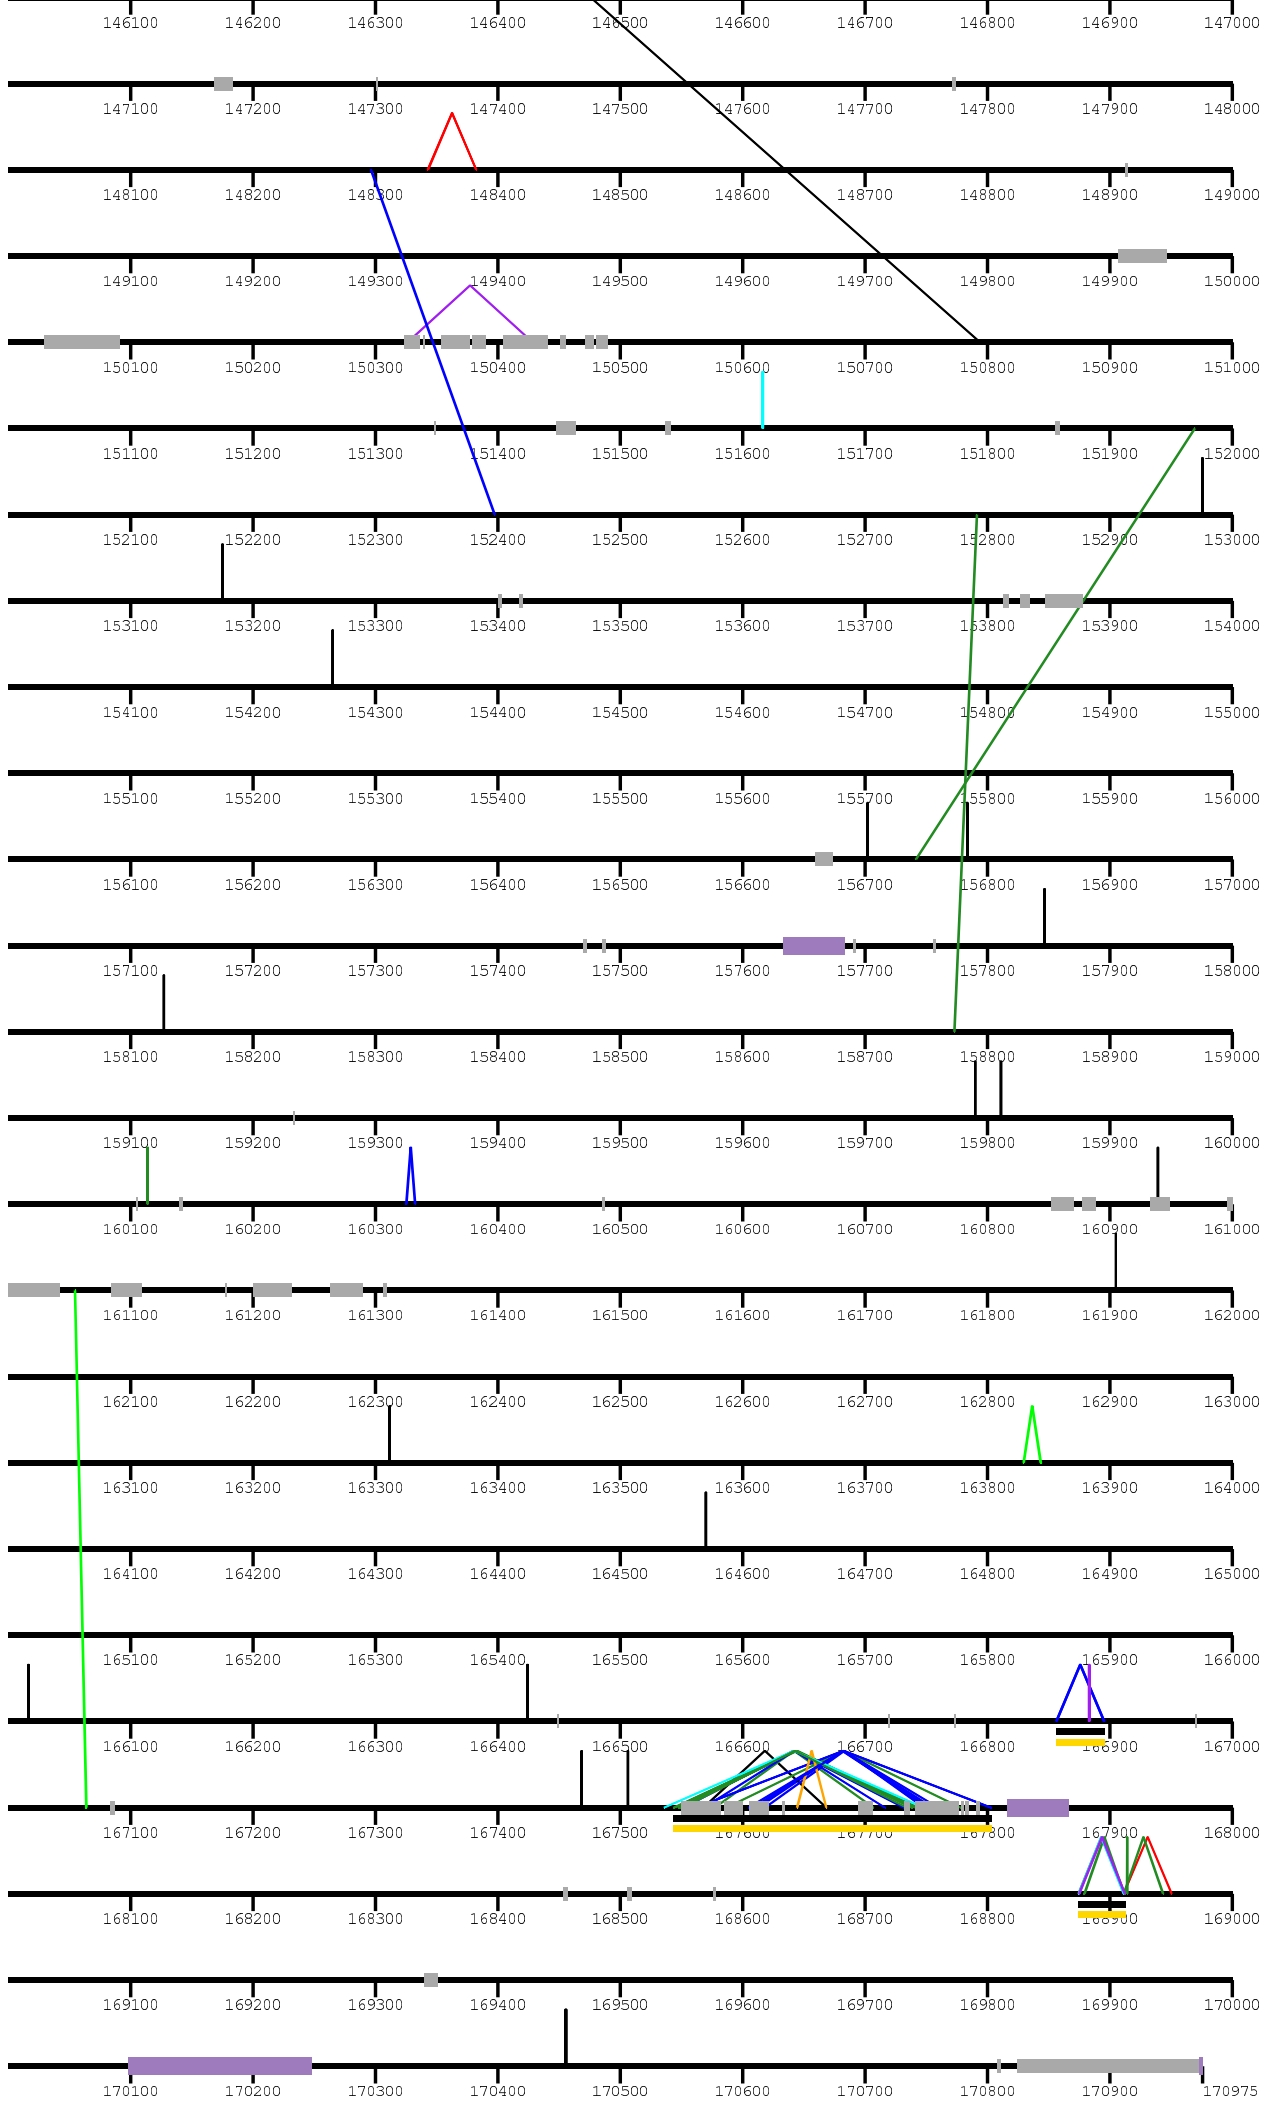

chr7

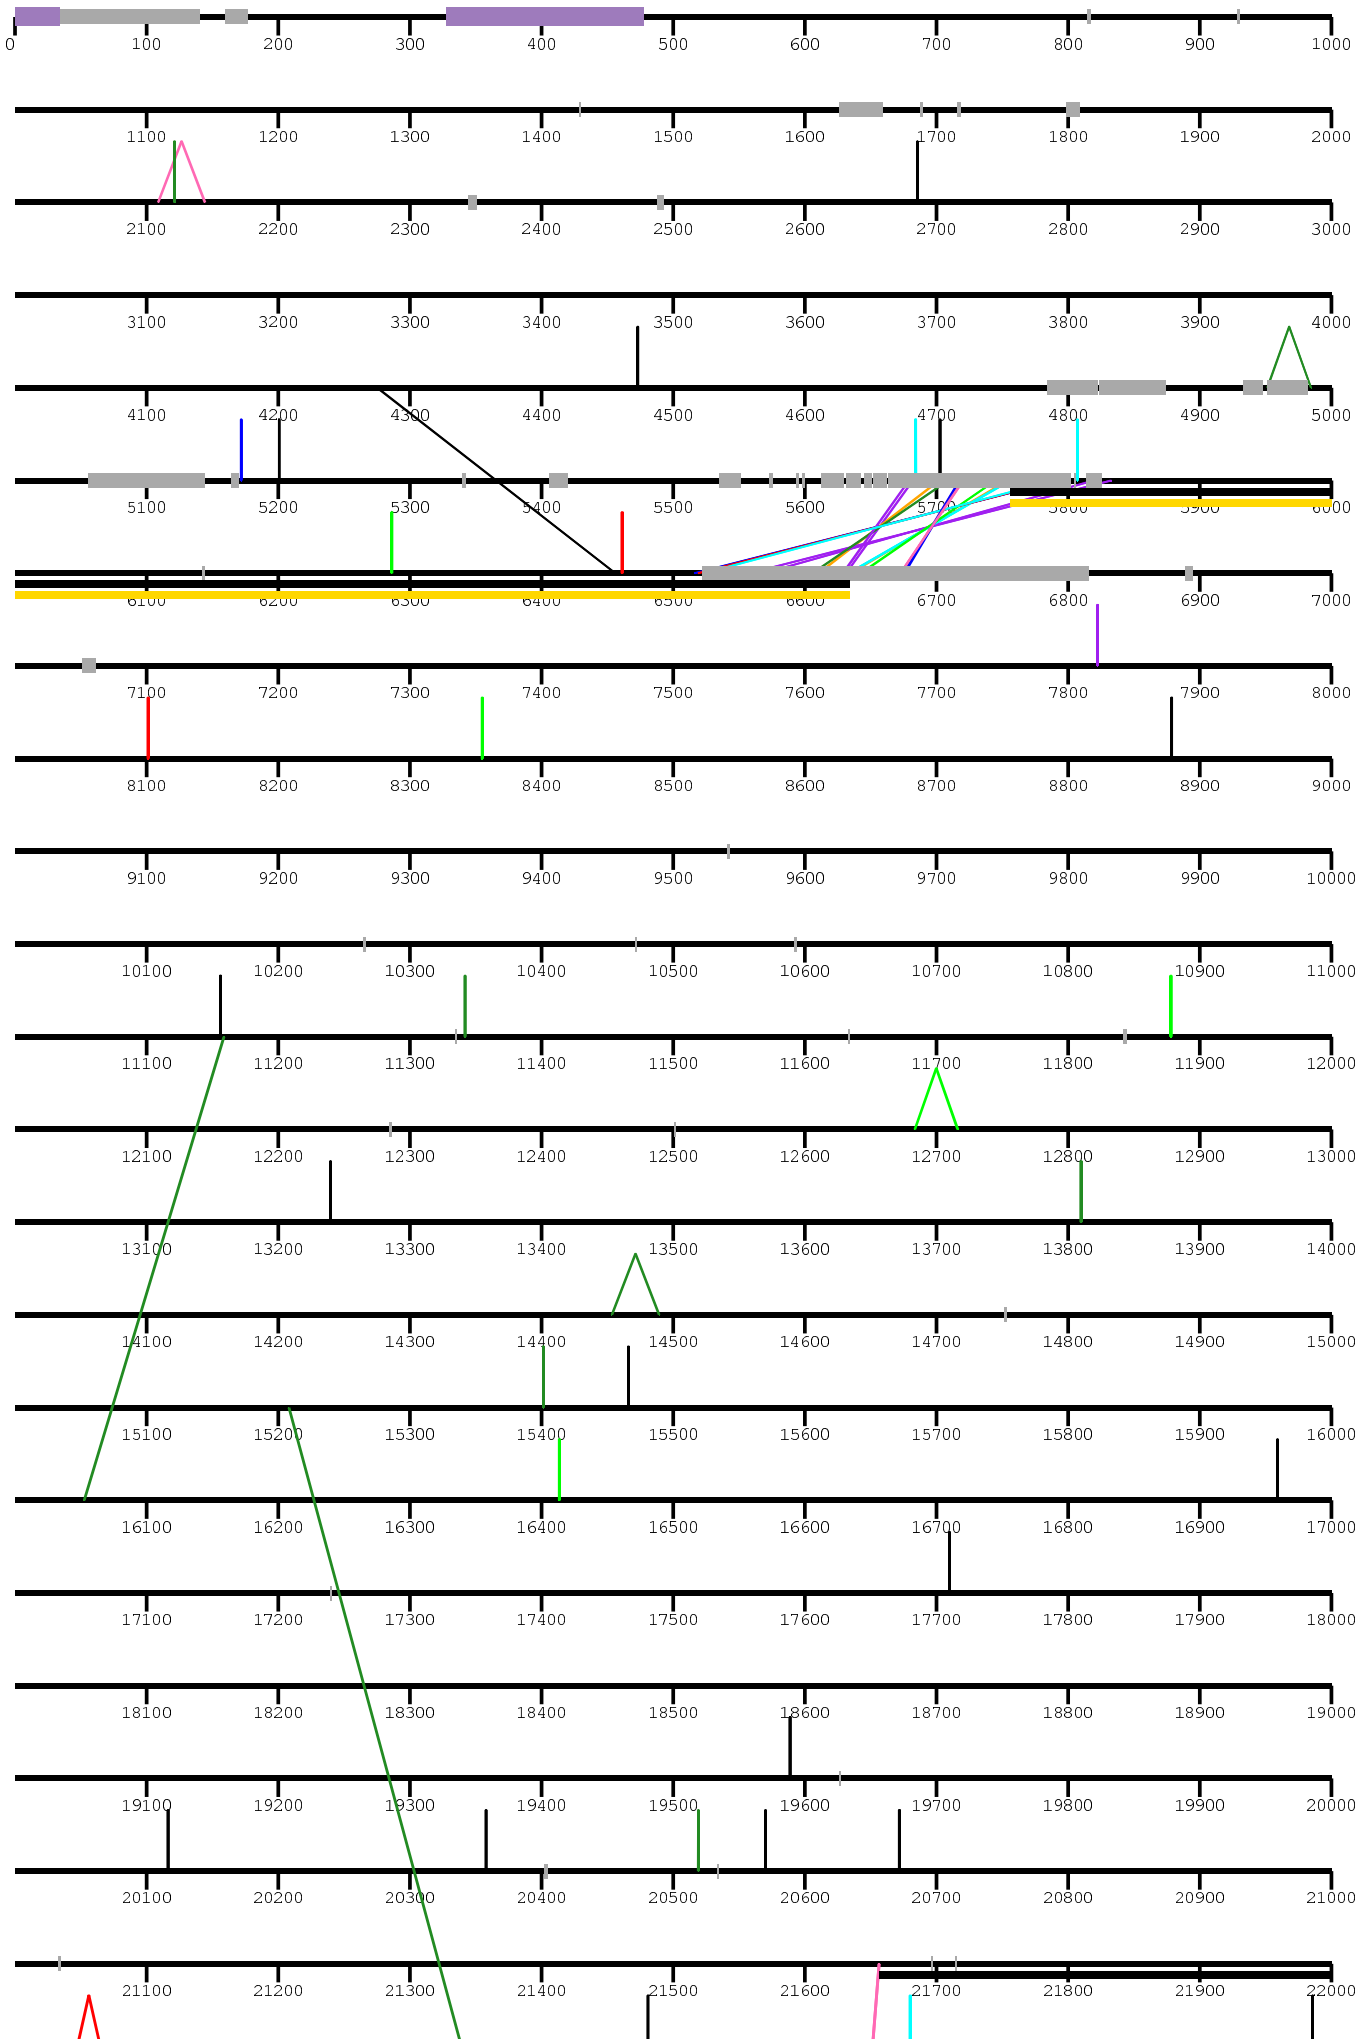

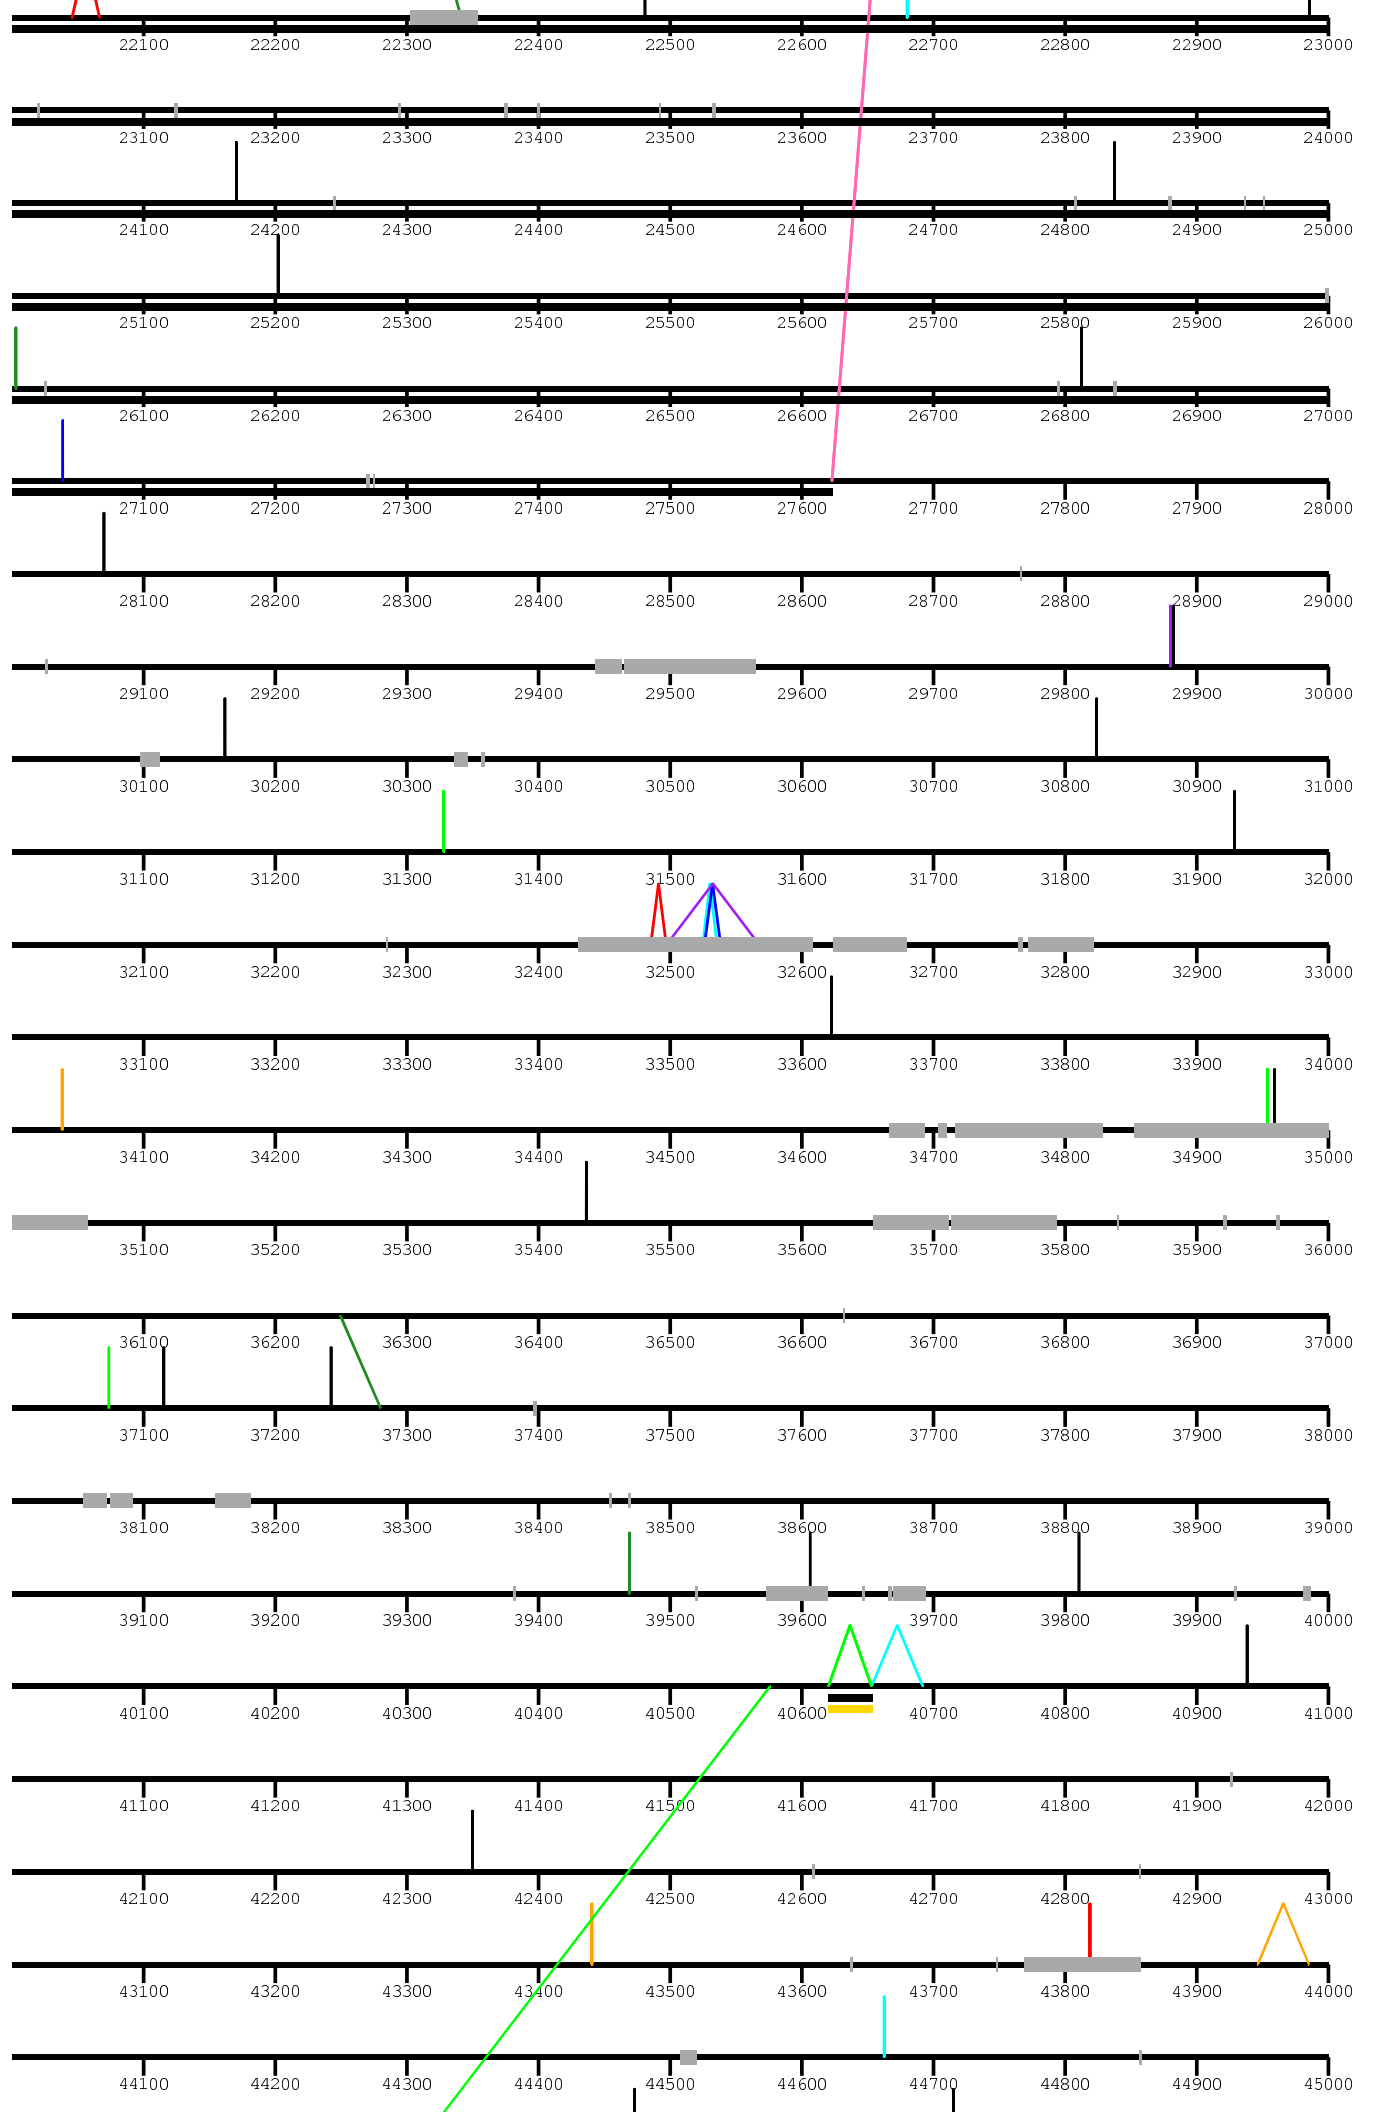

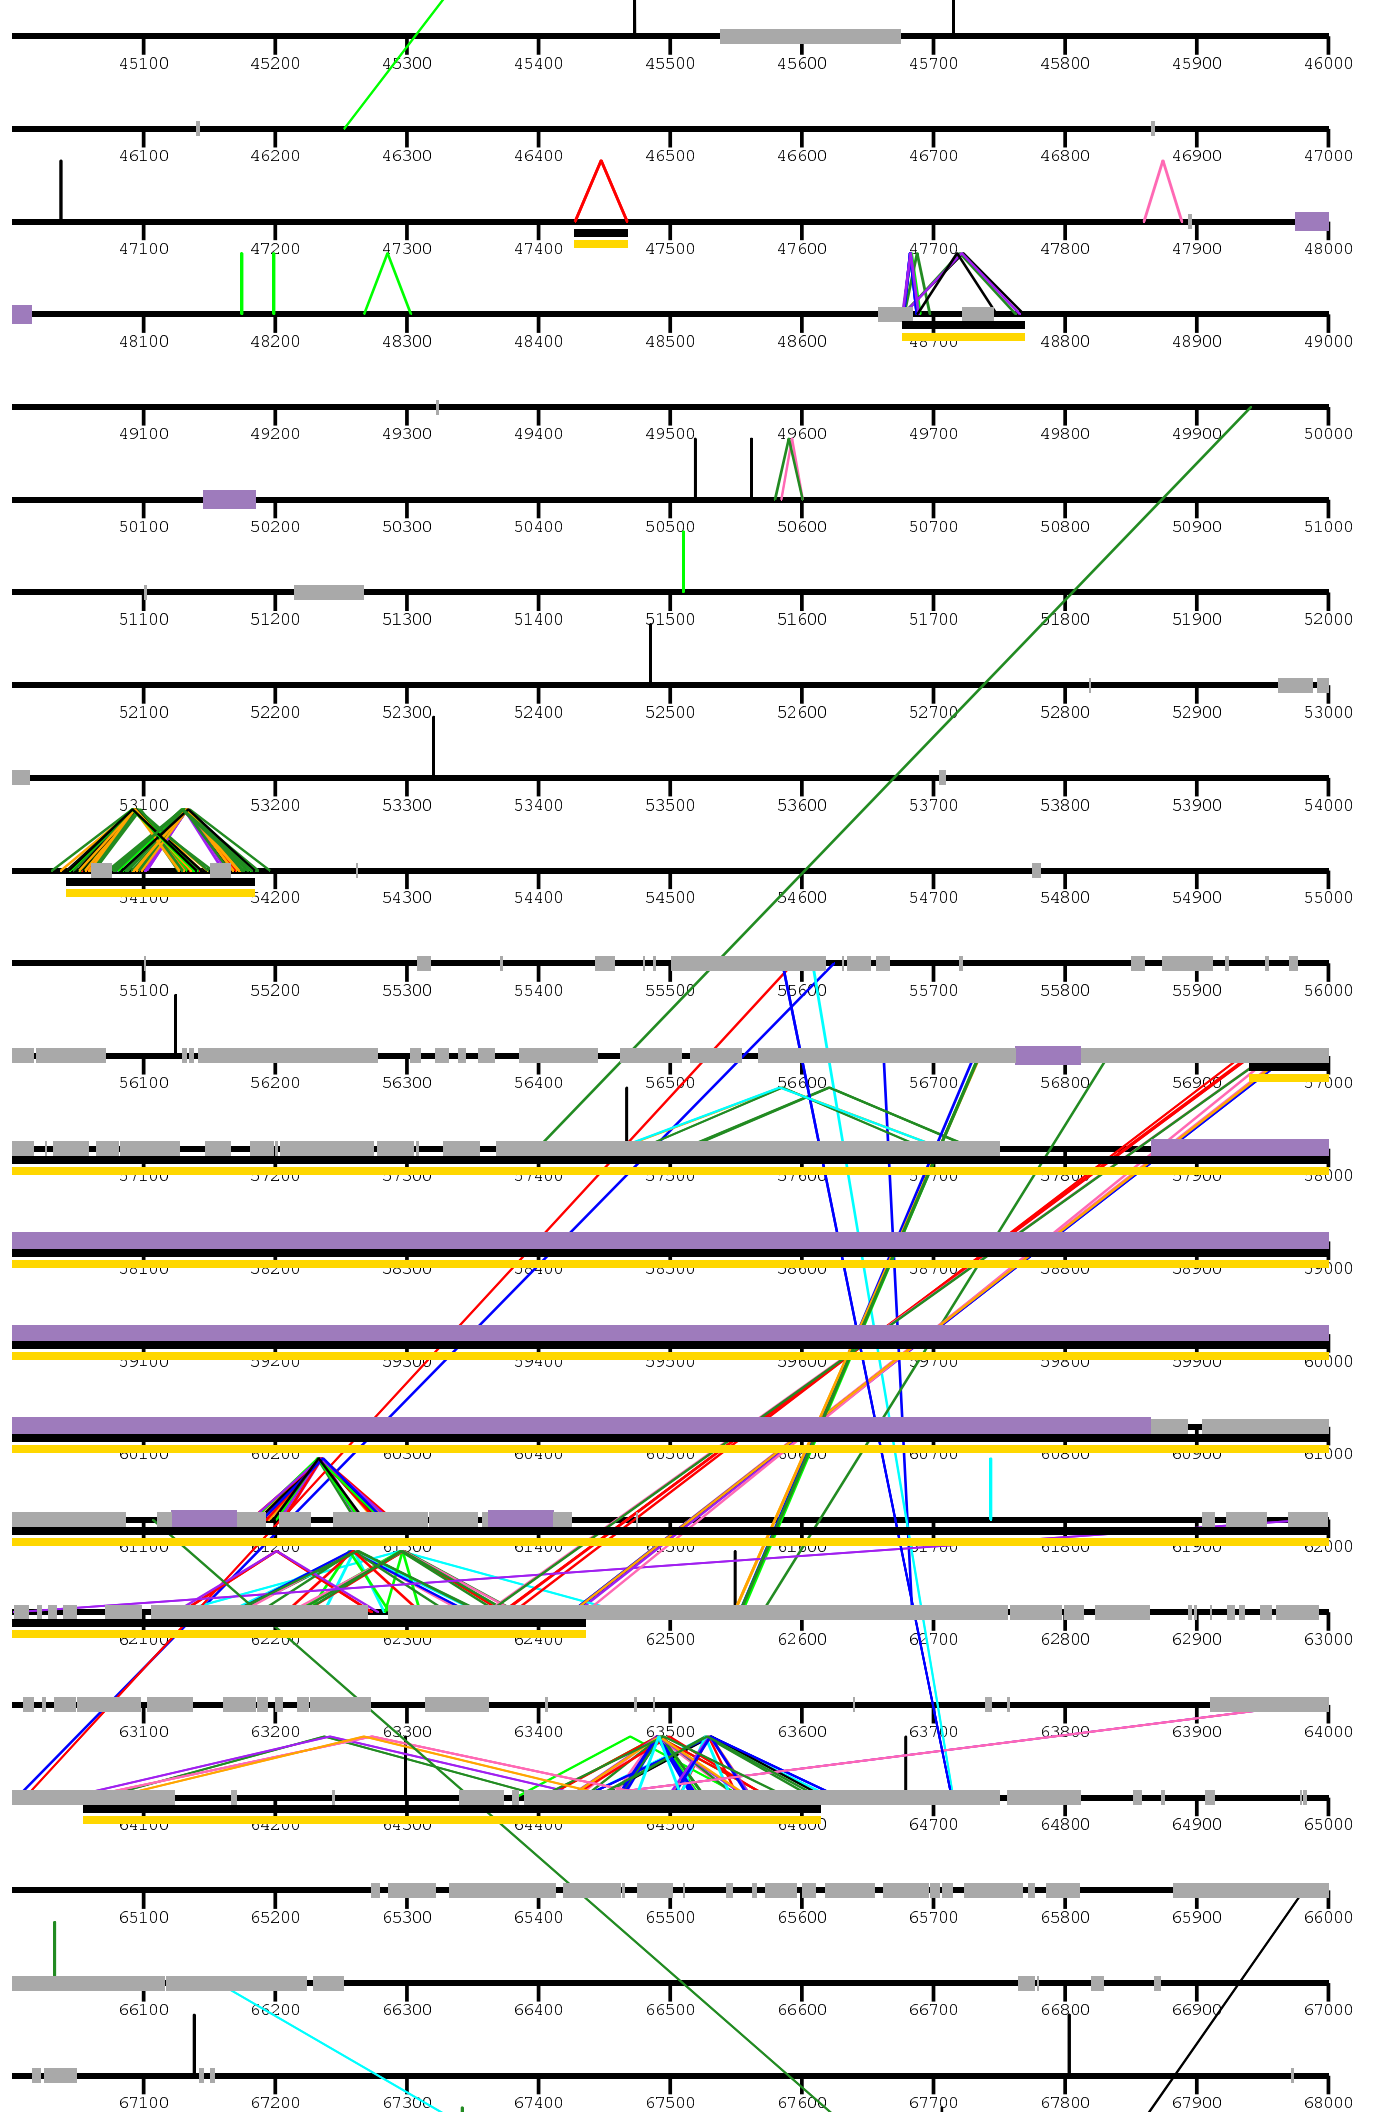

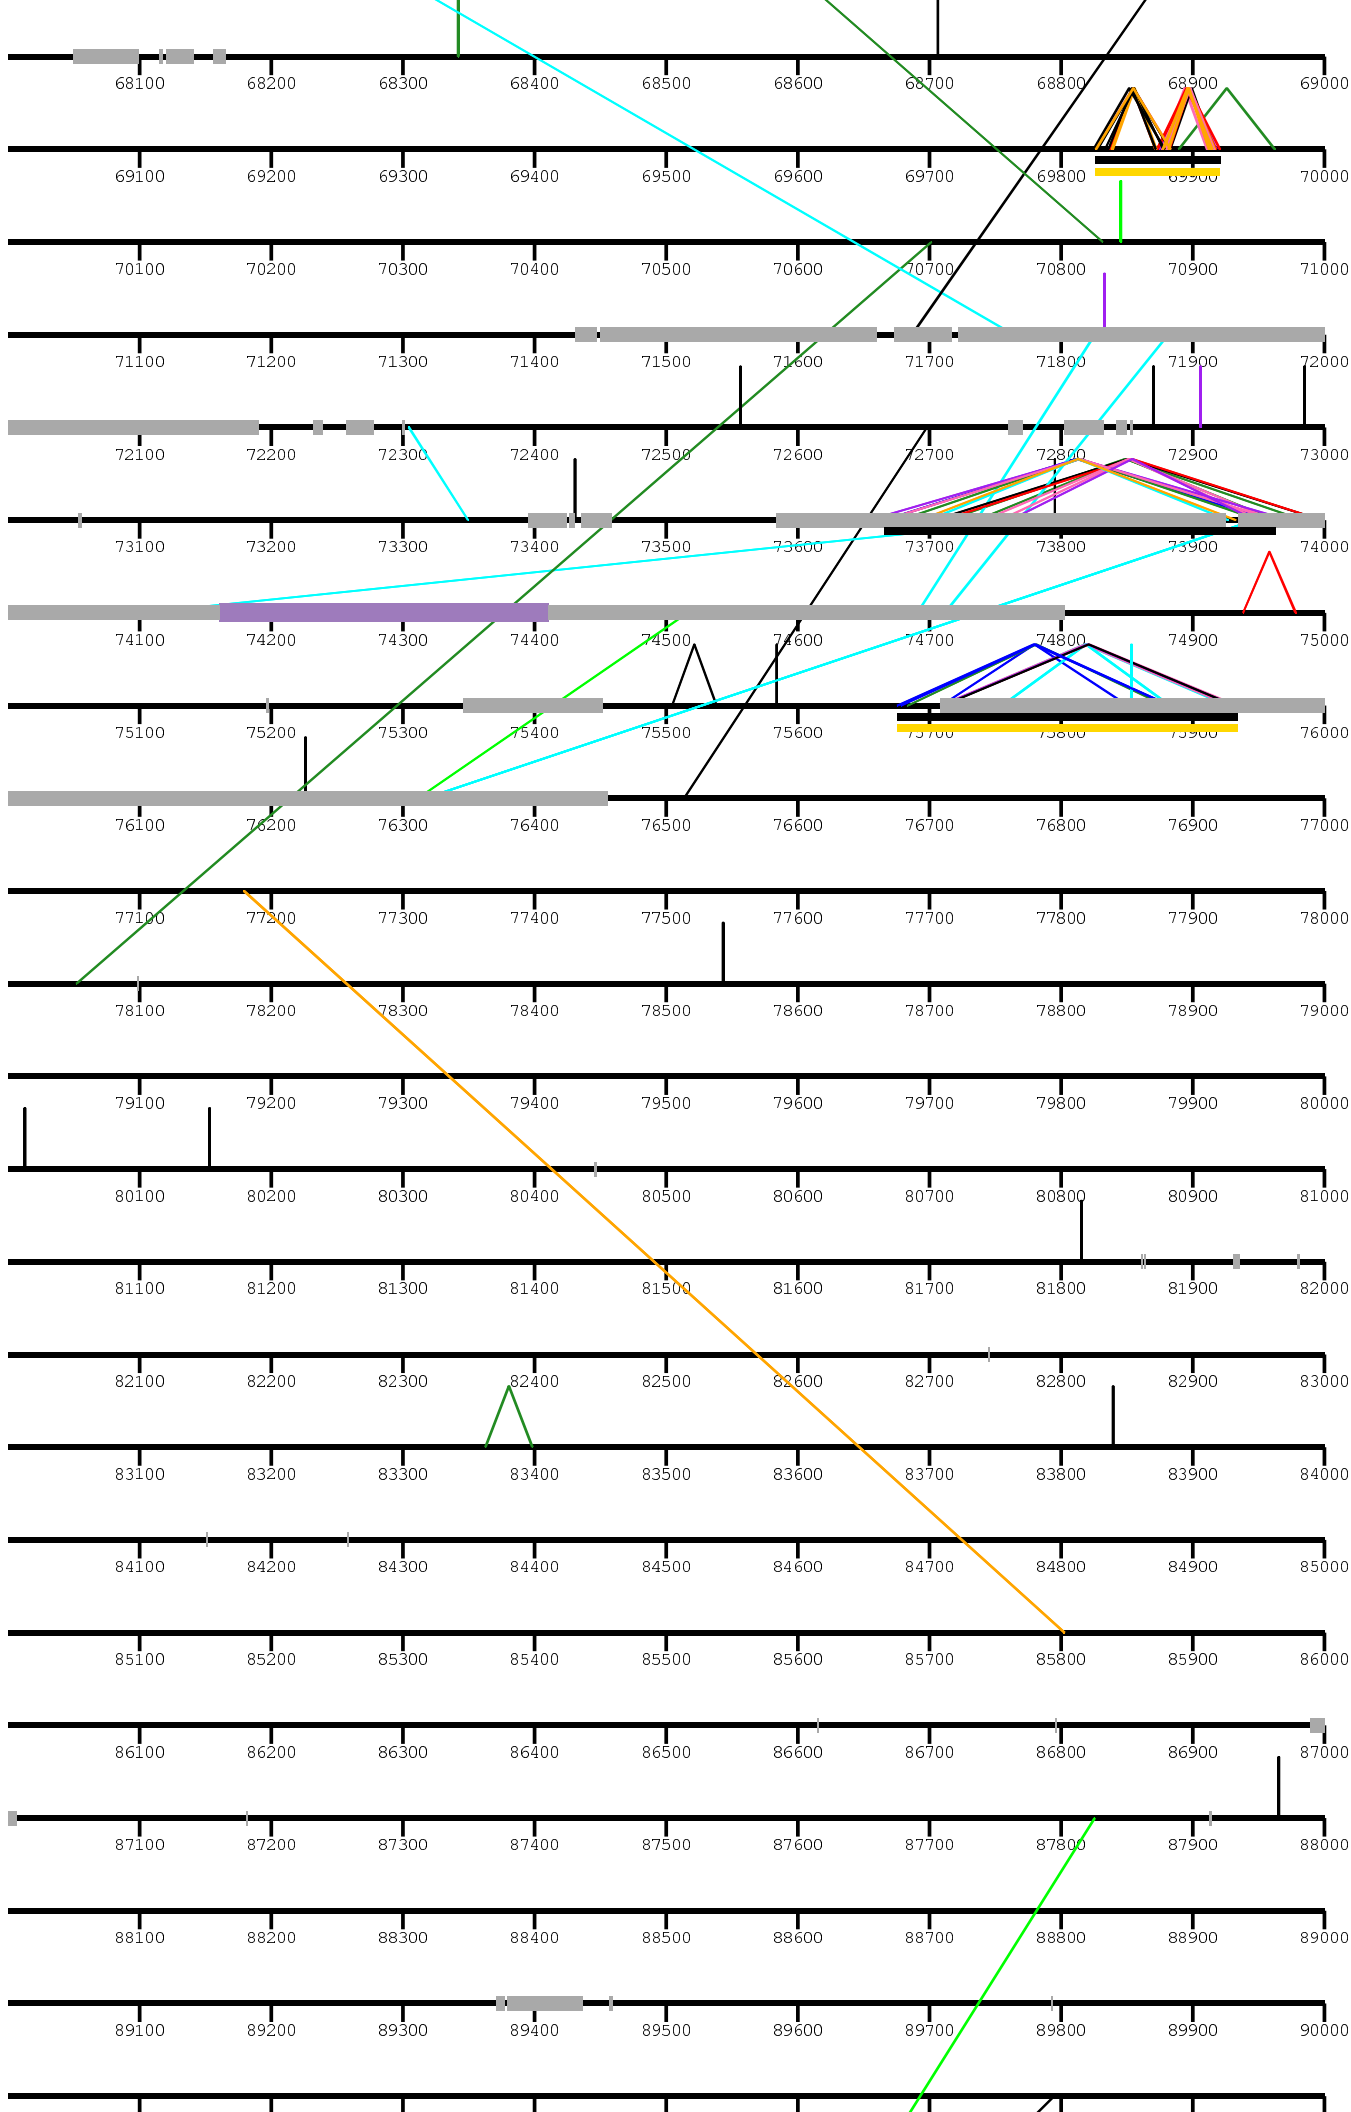

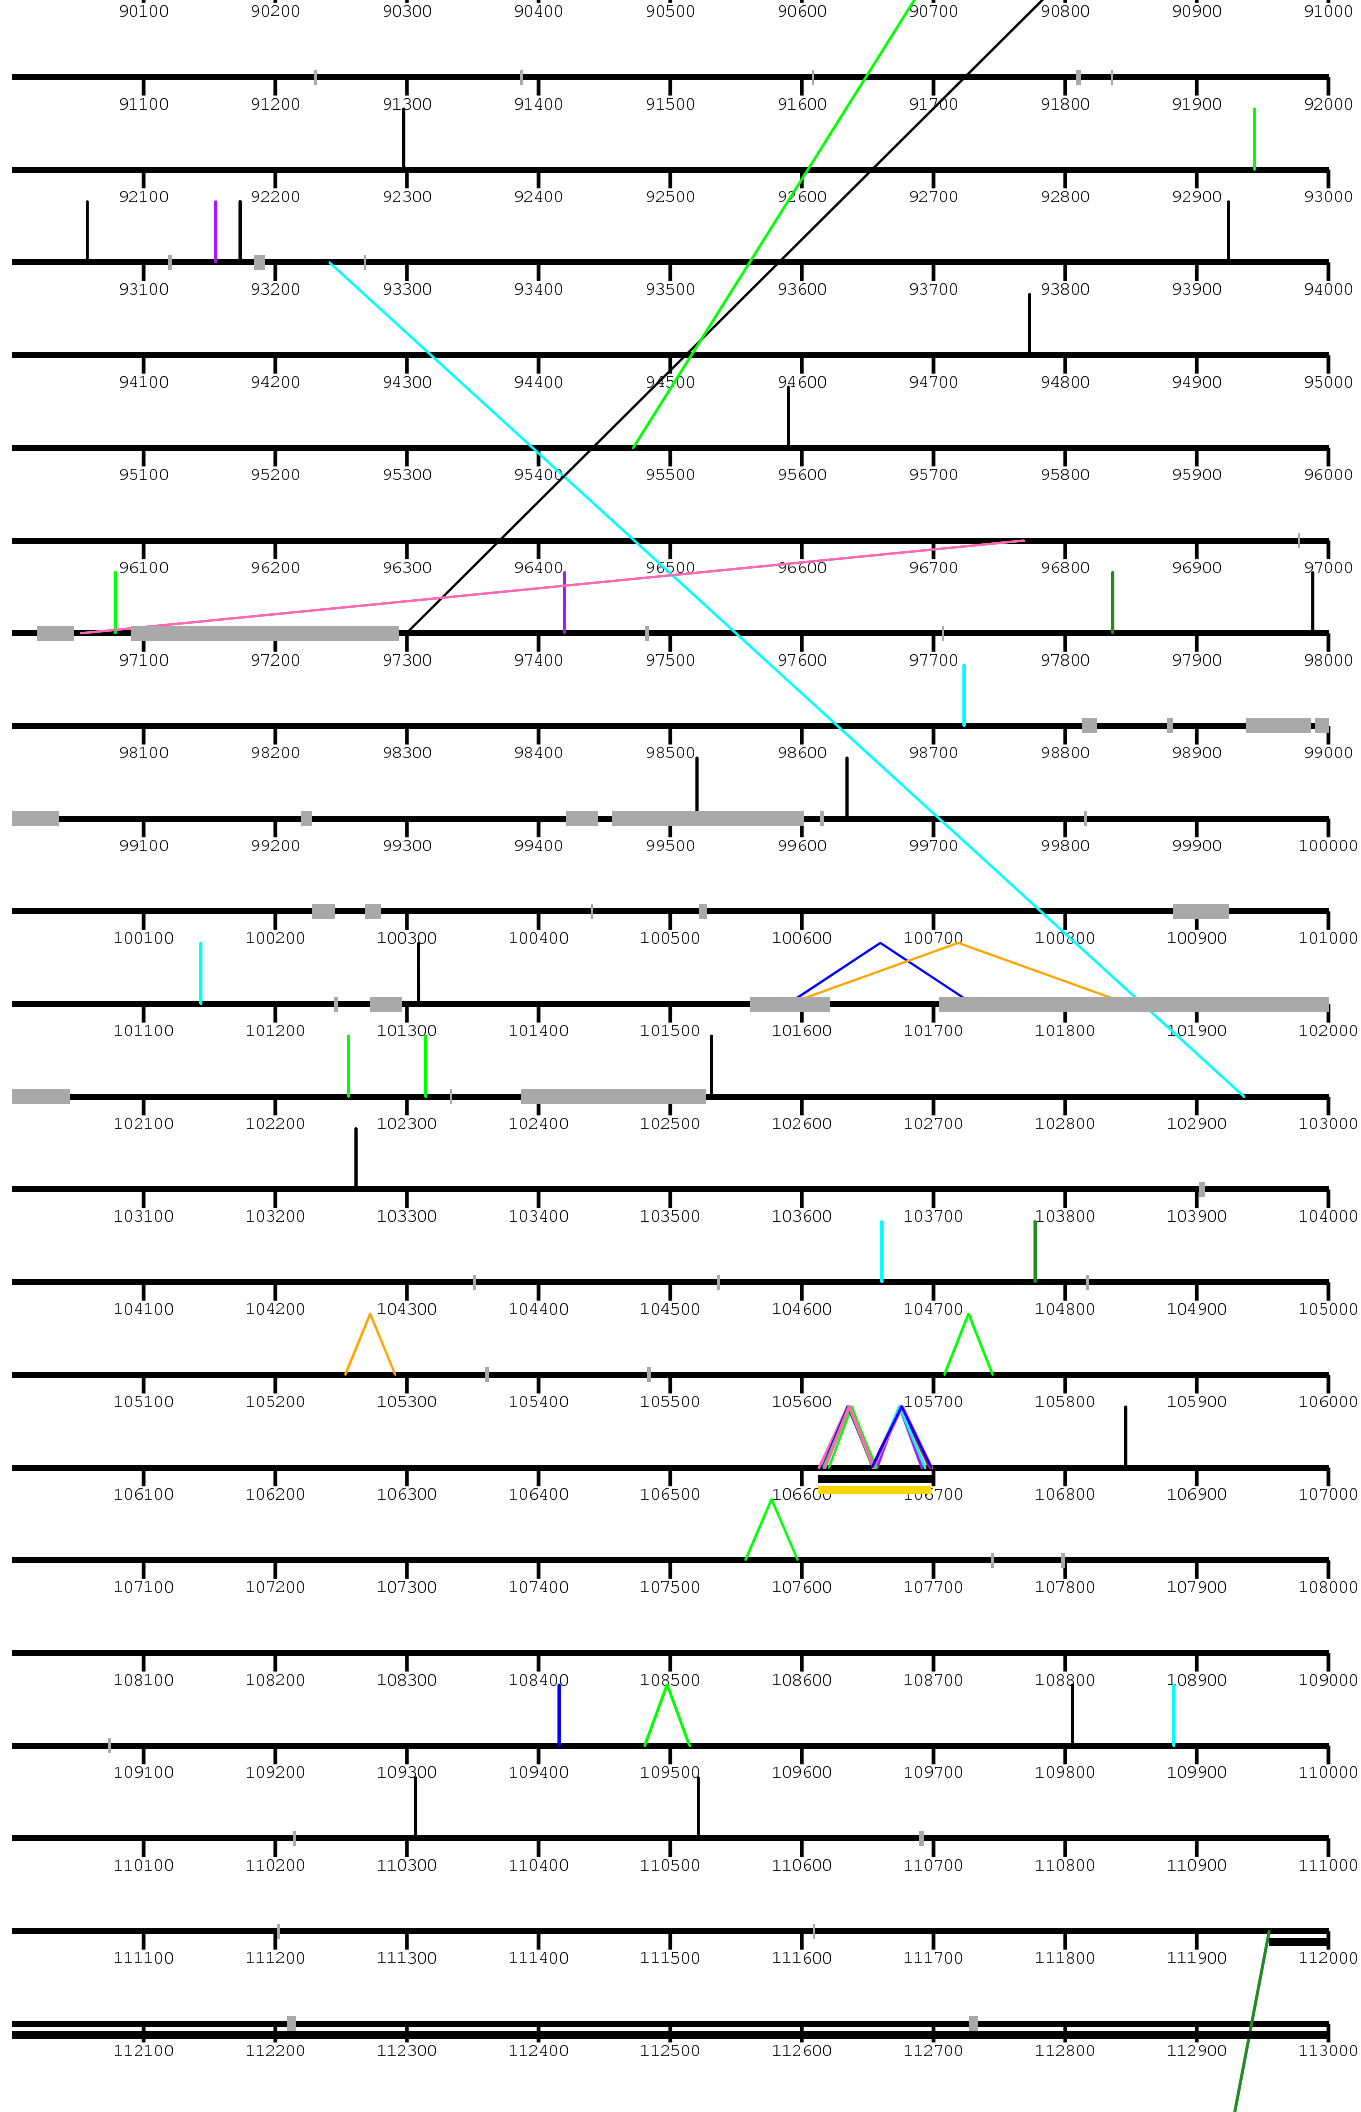



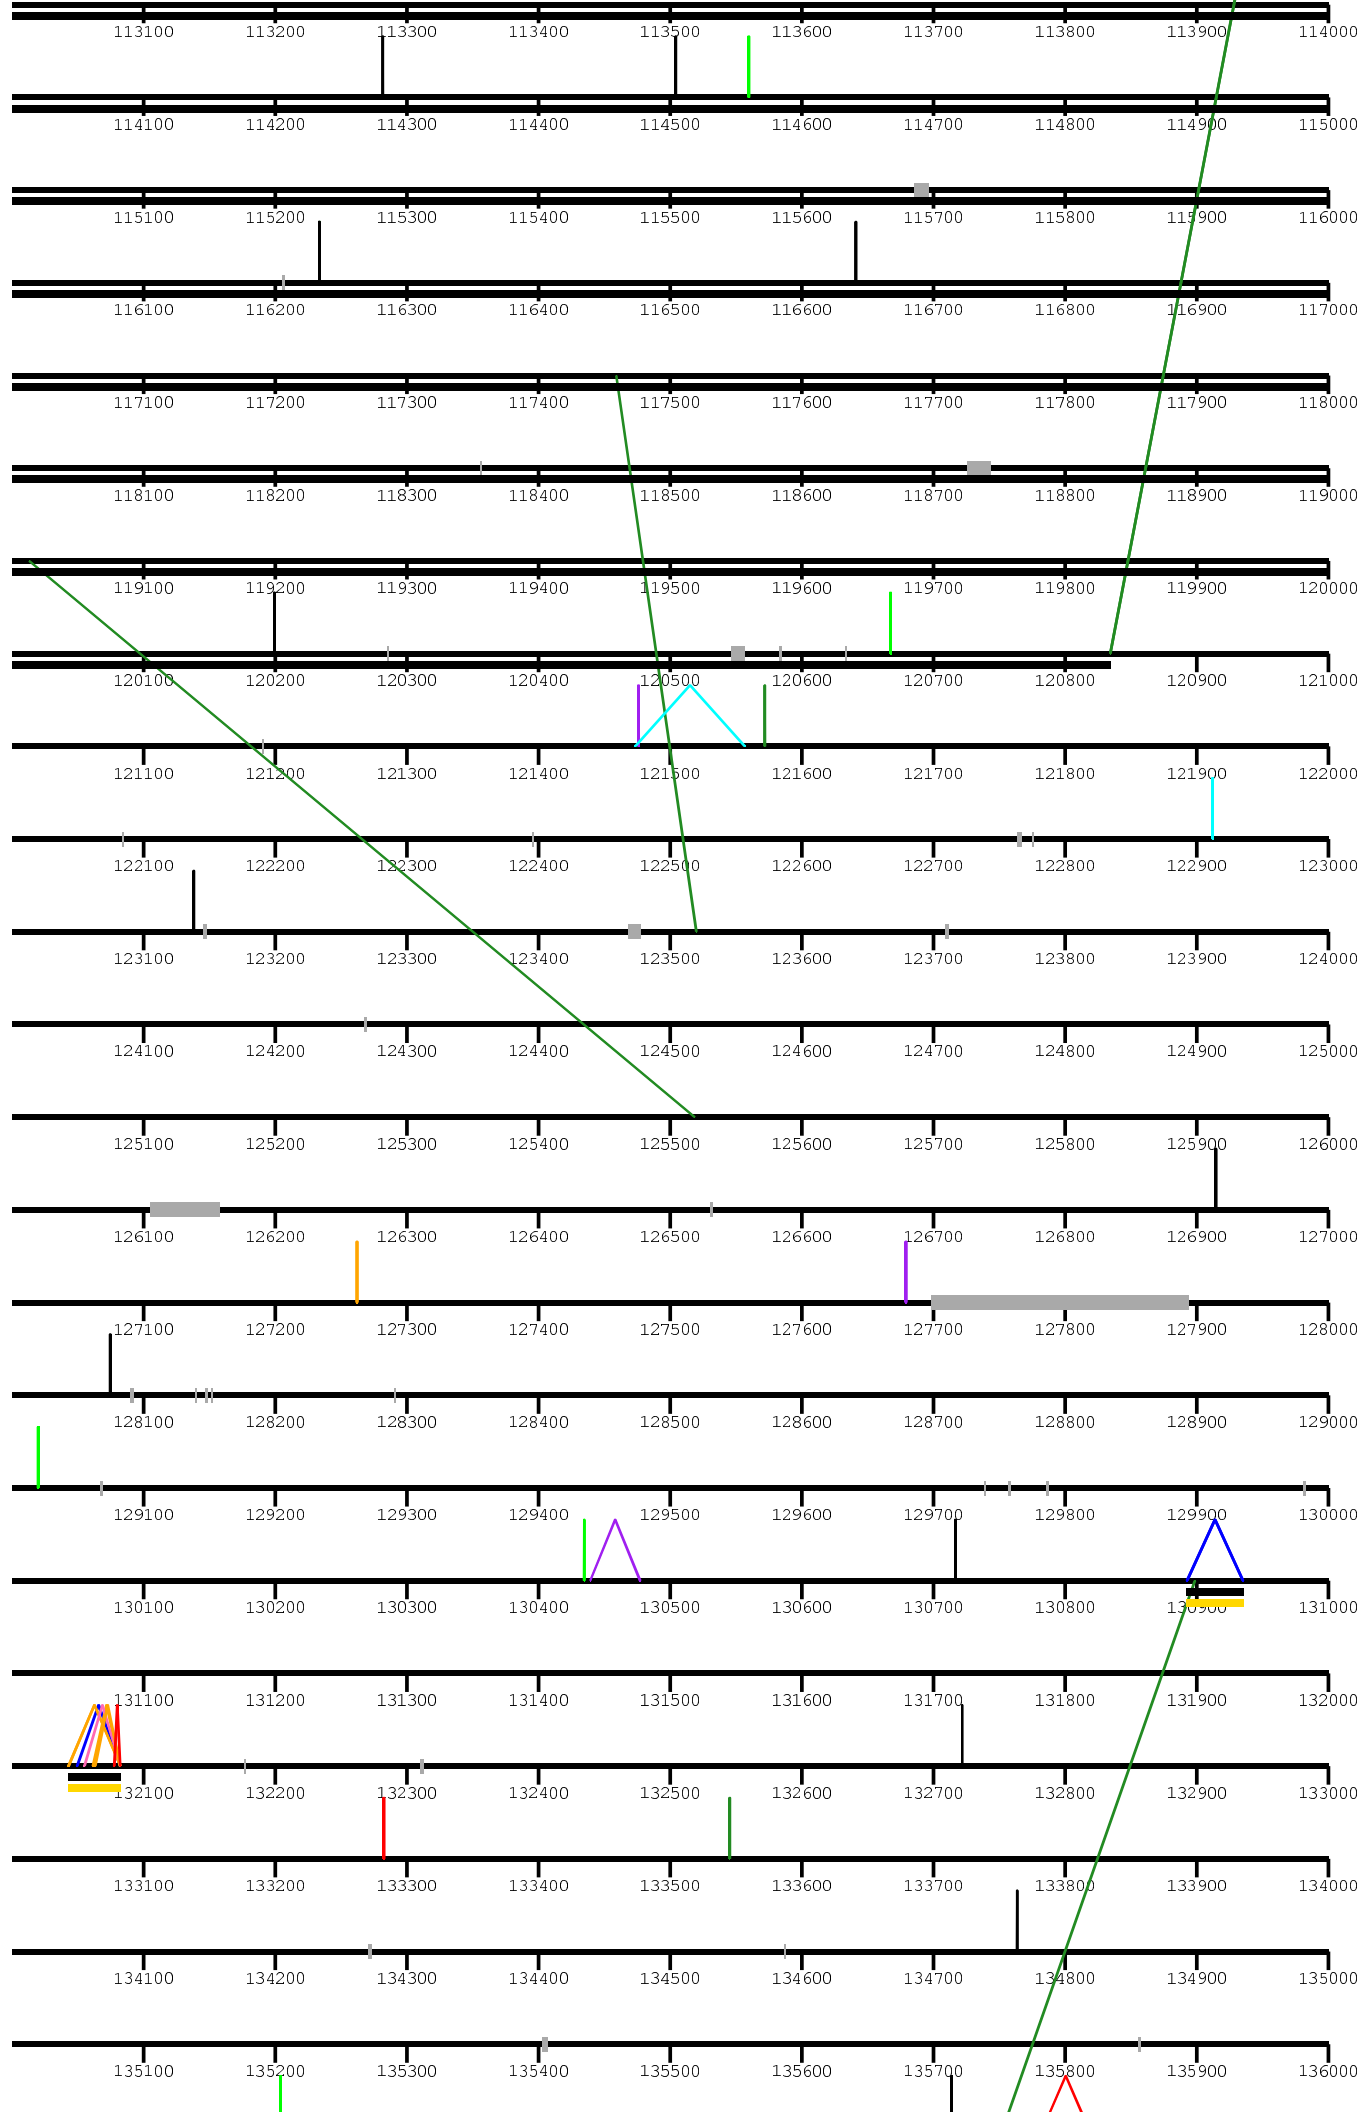

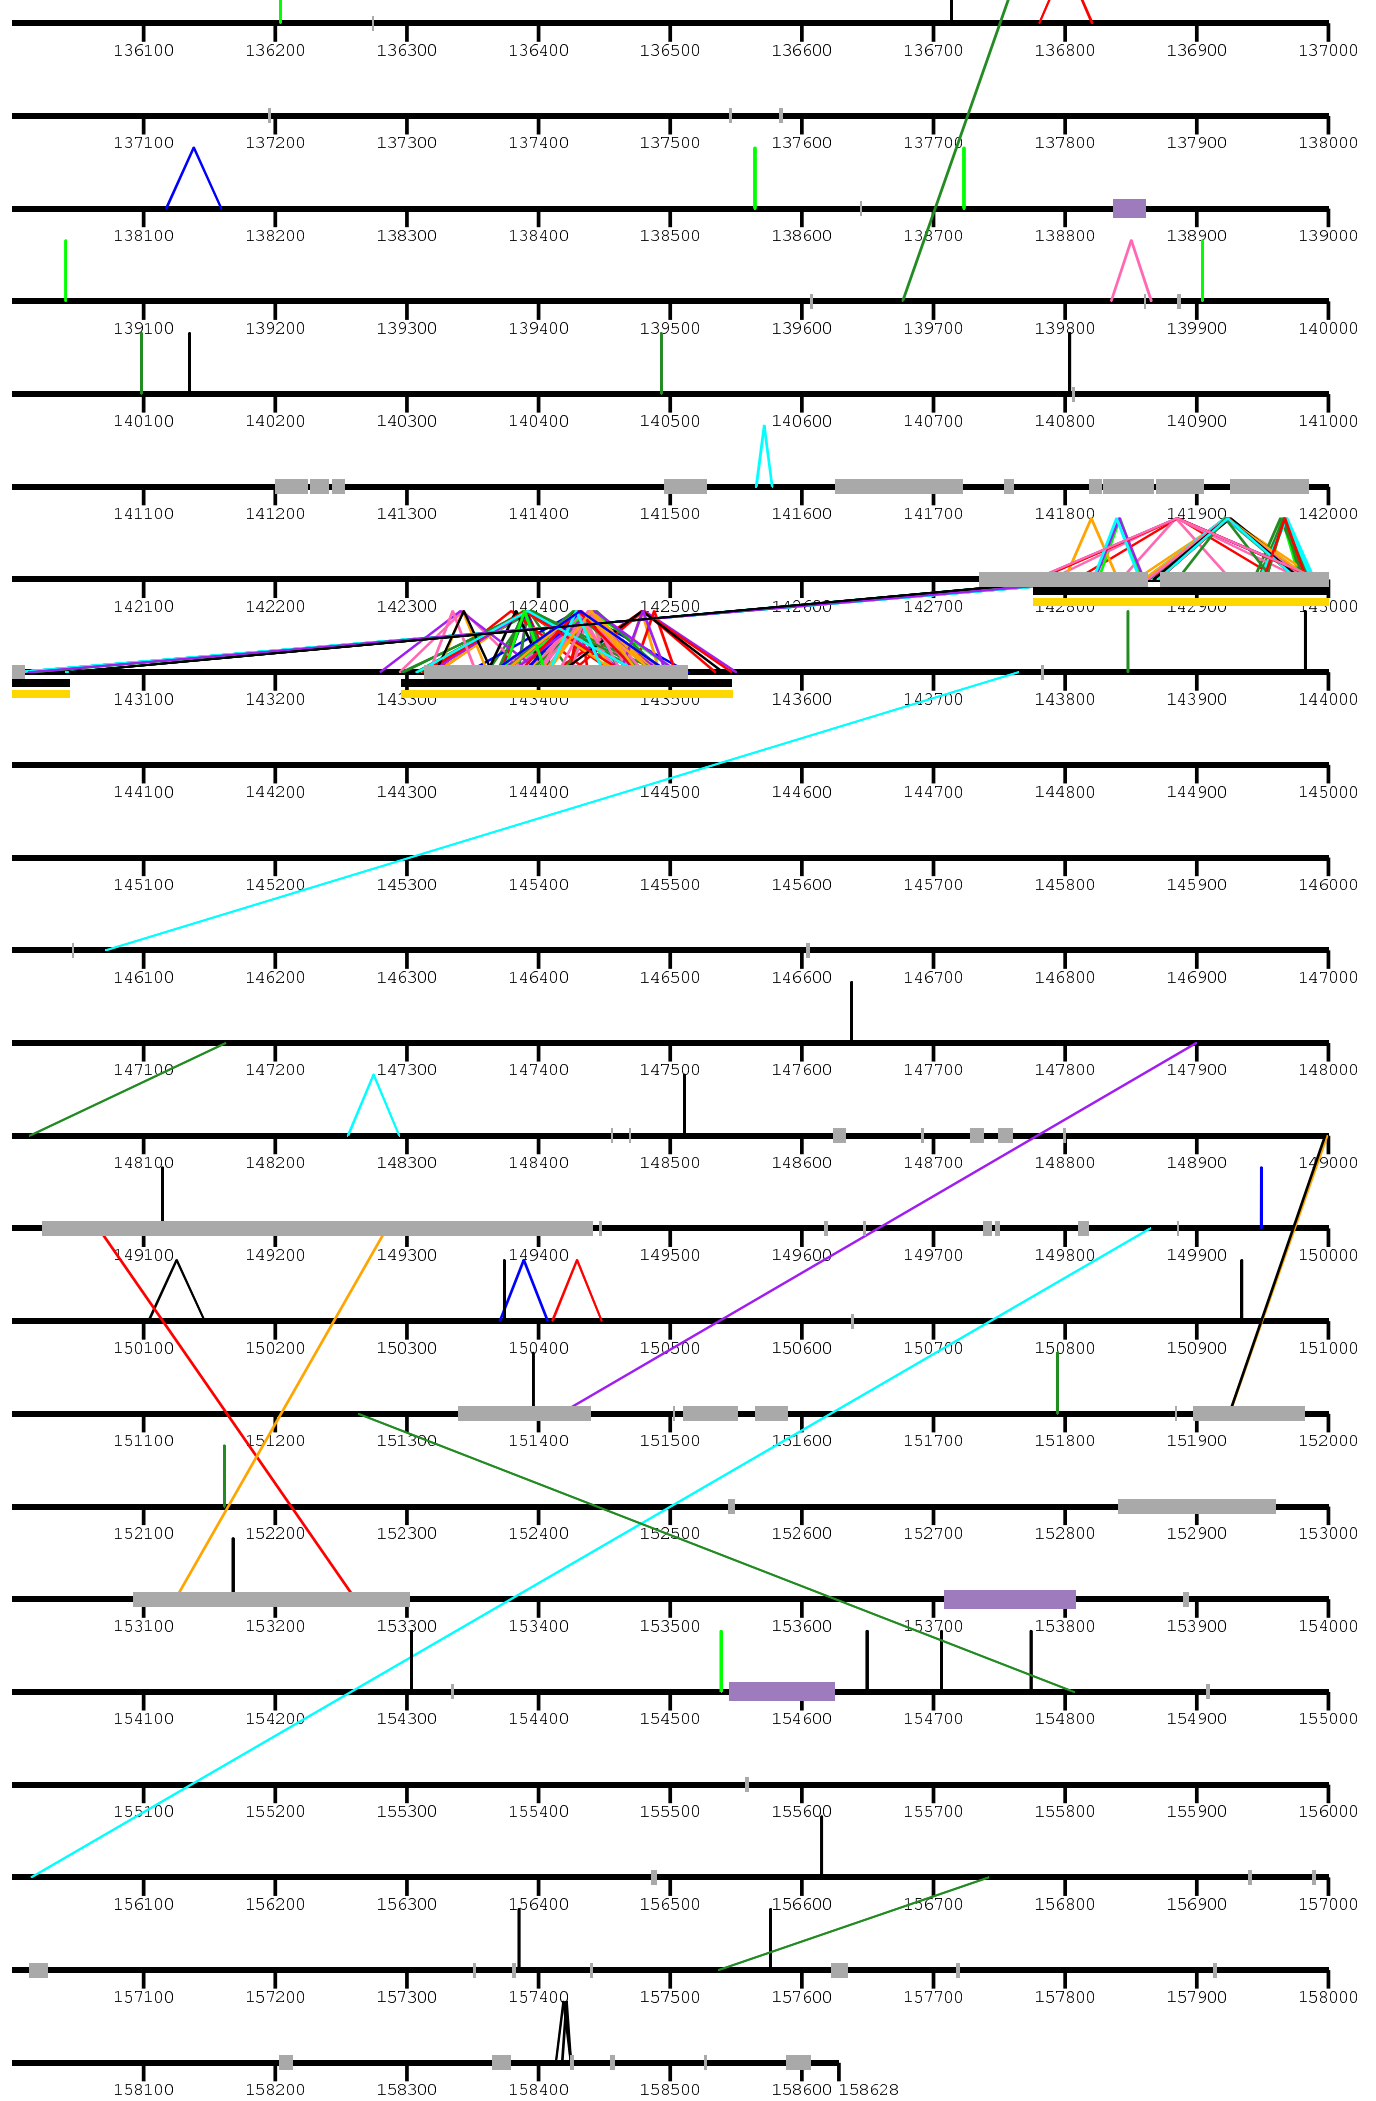

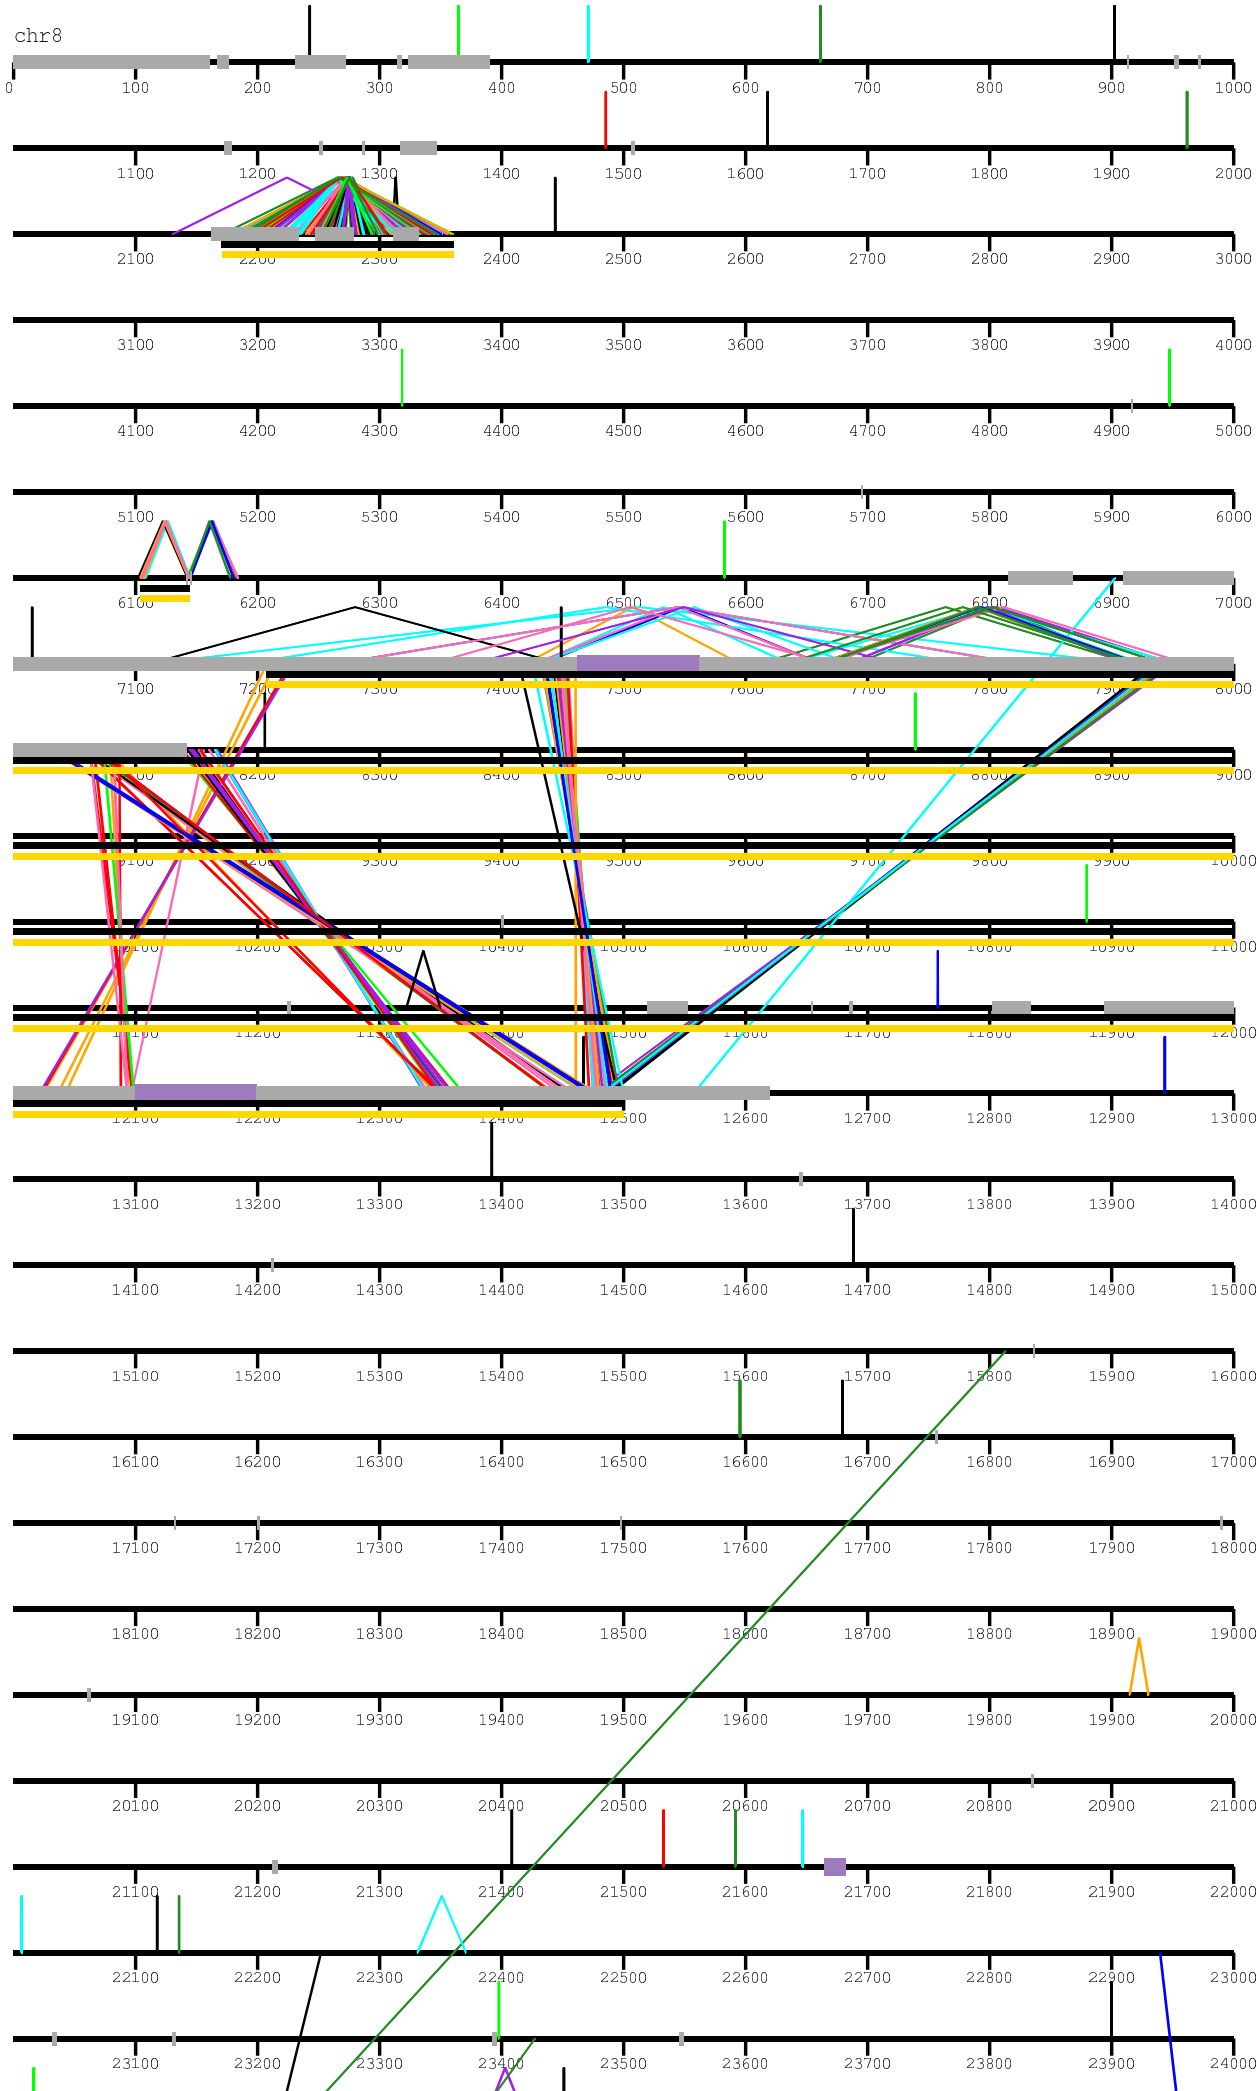

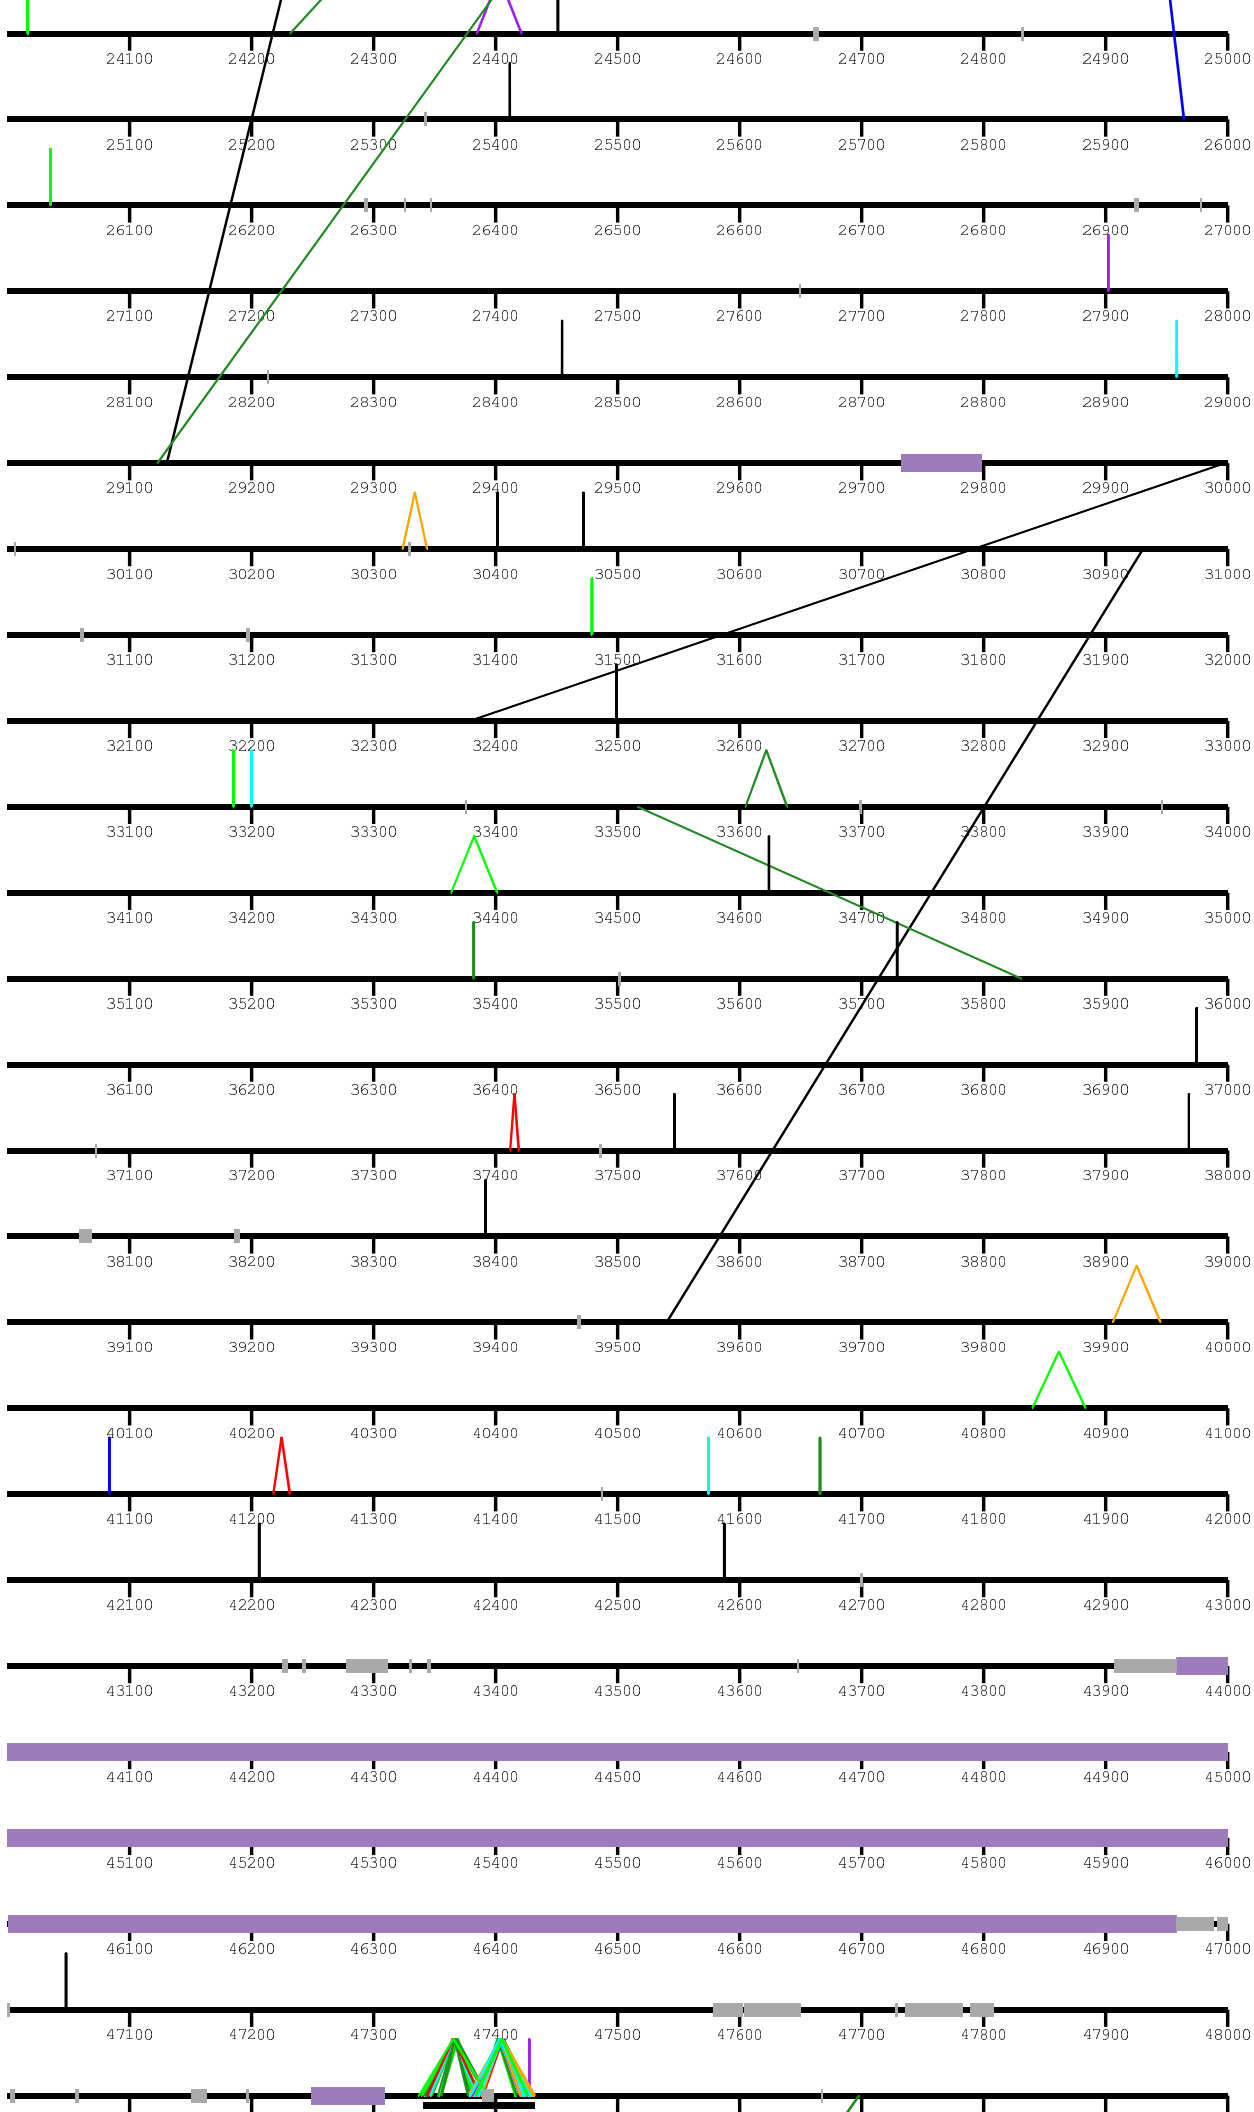

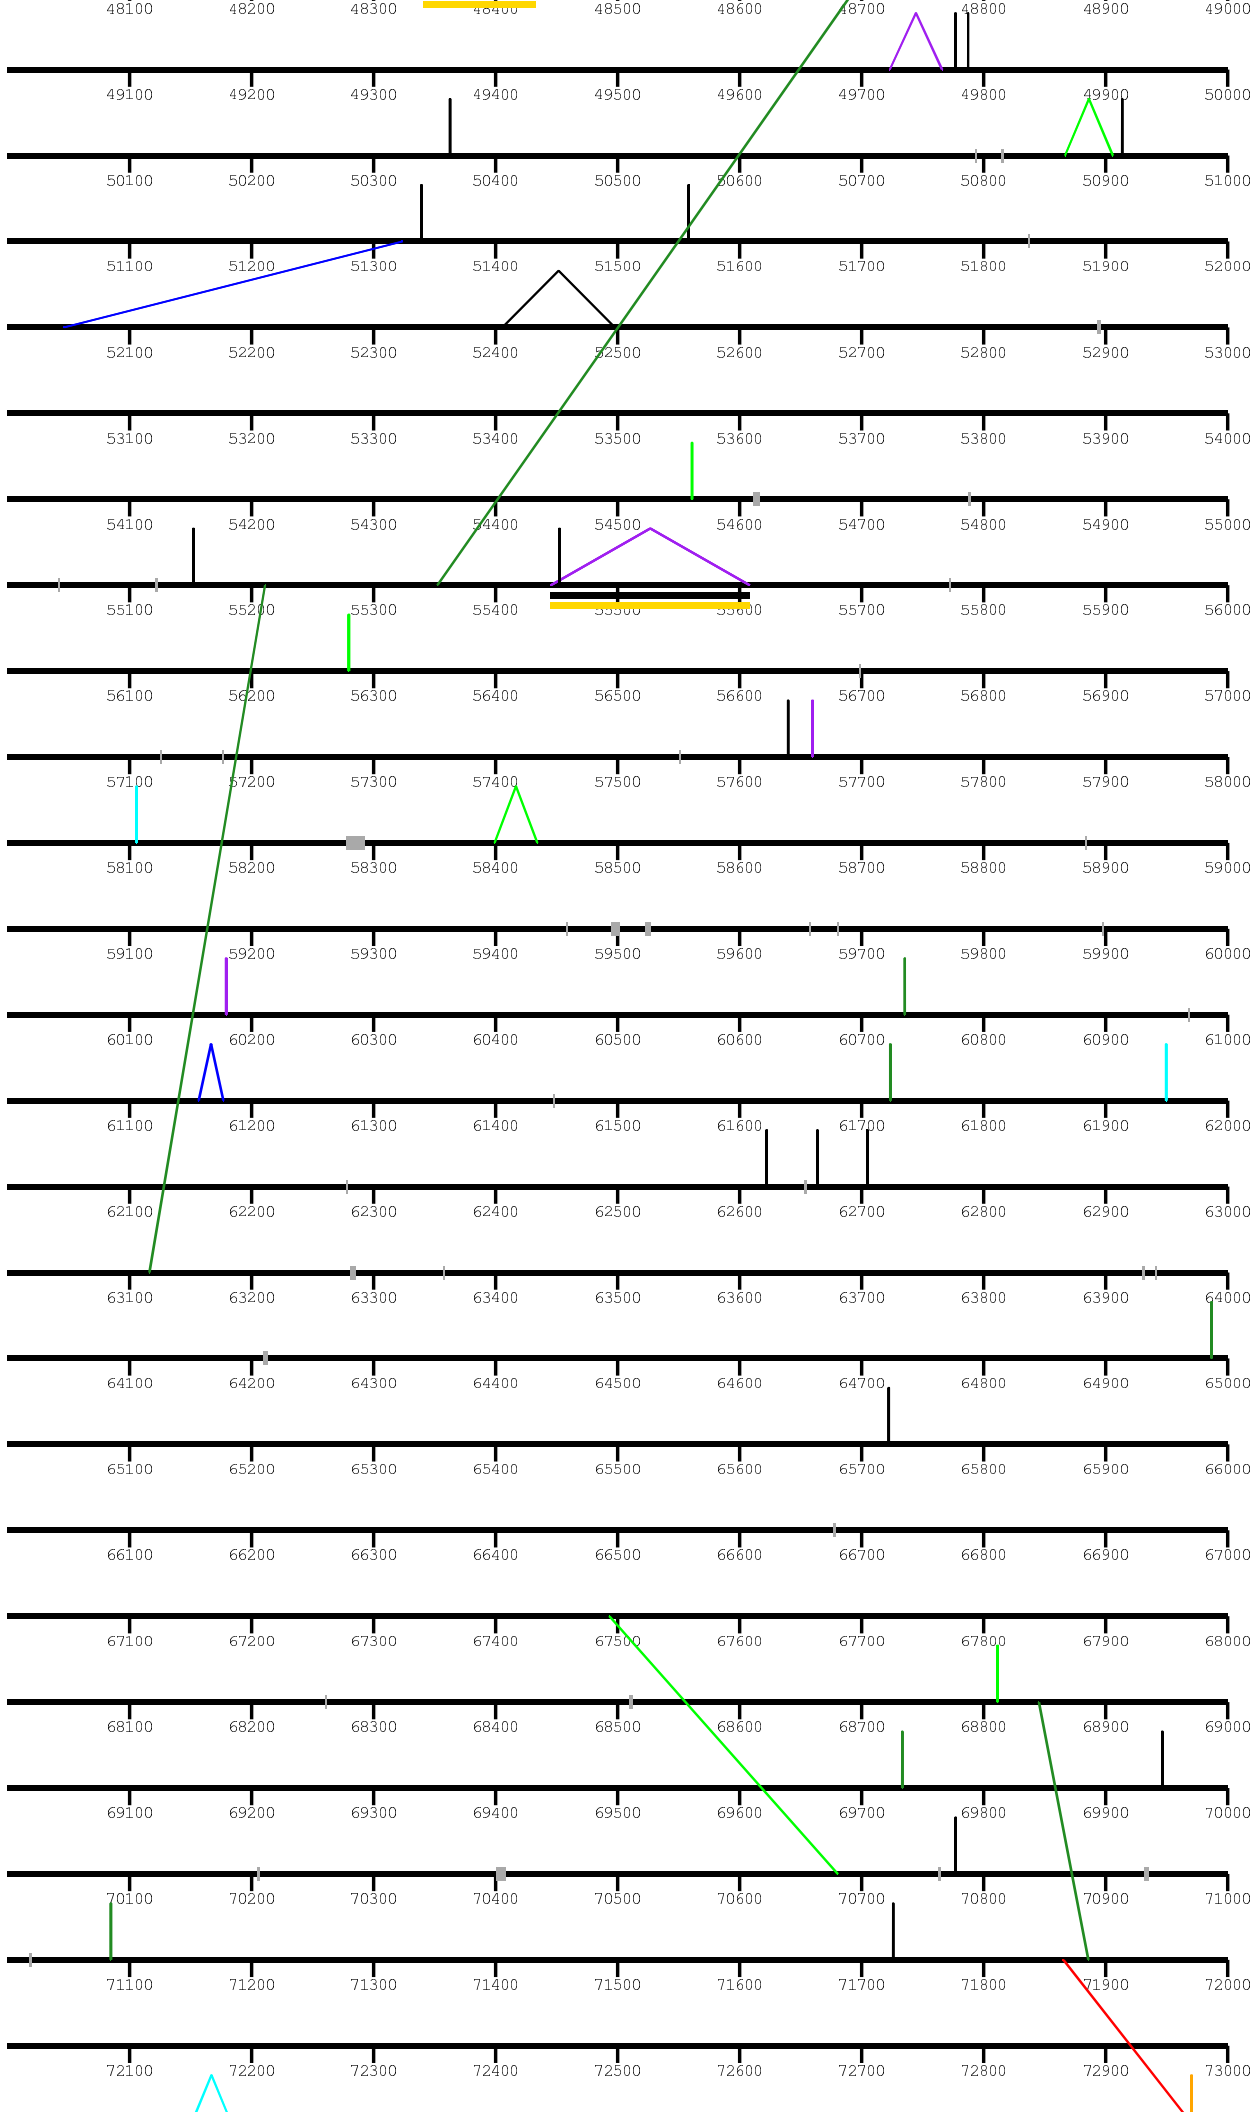

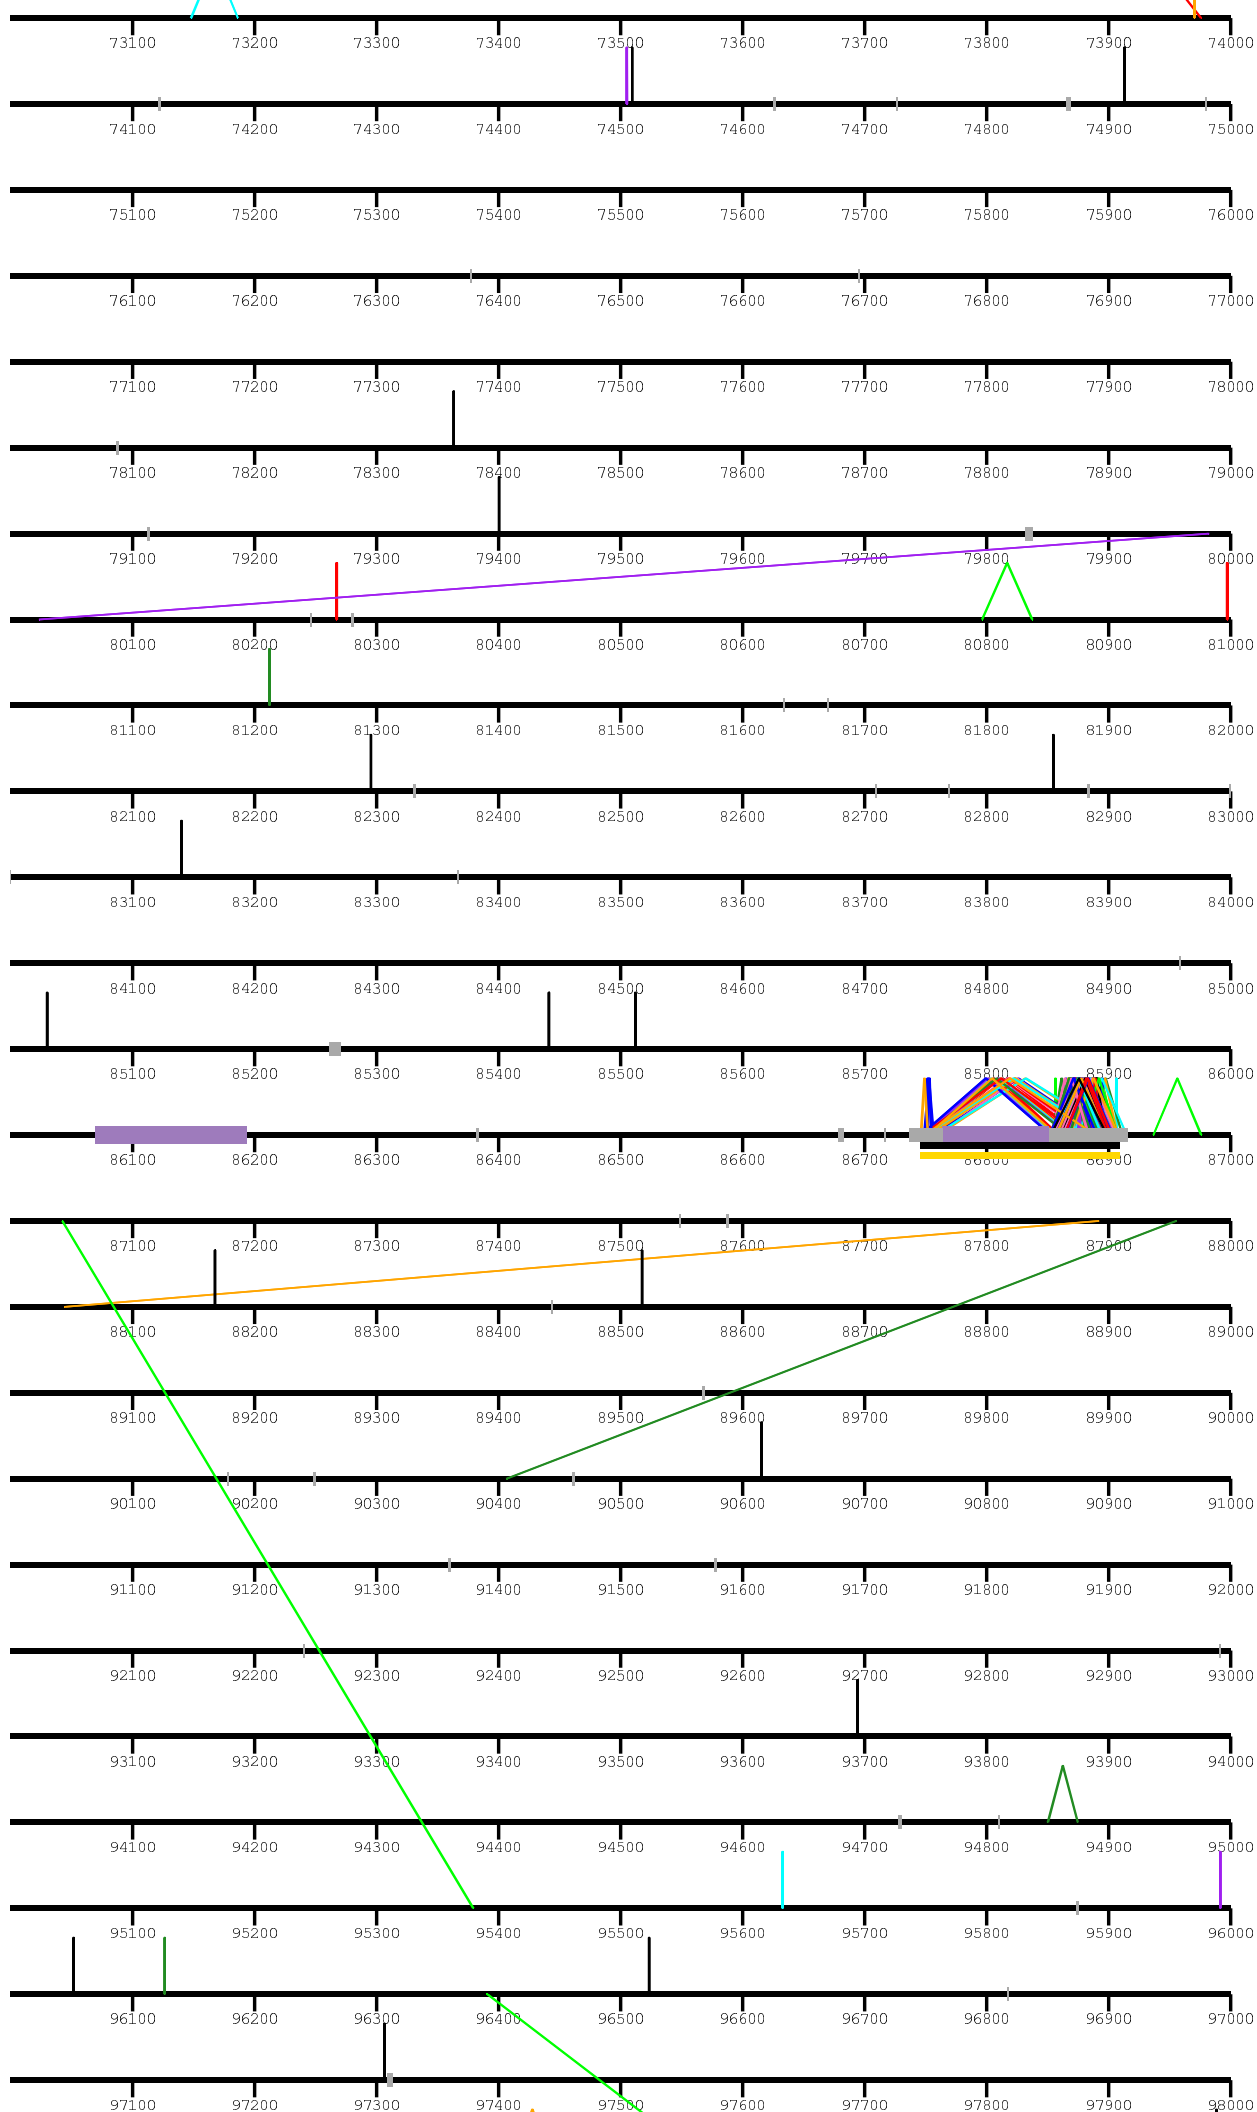

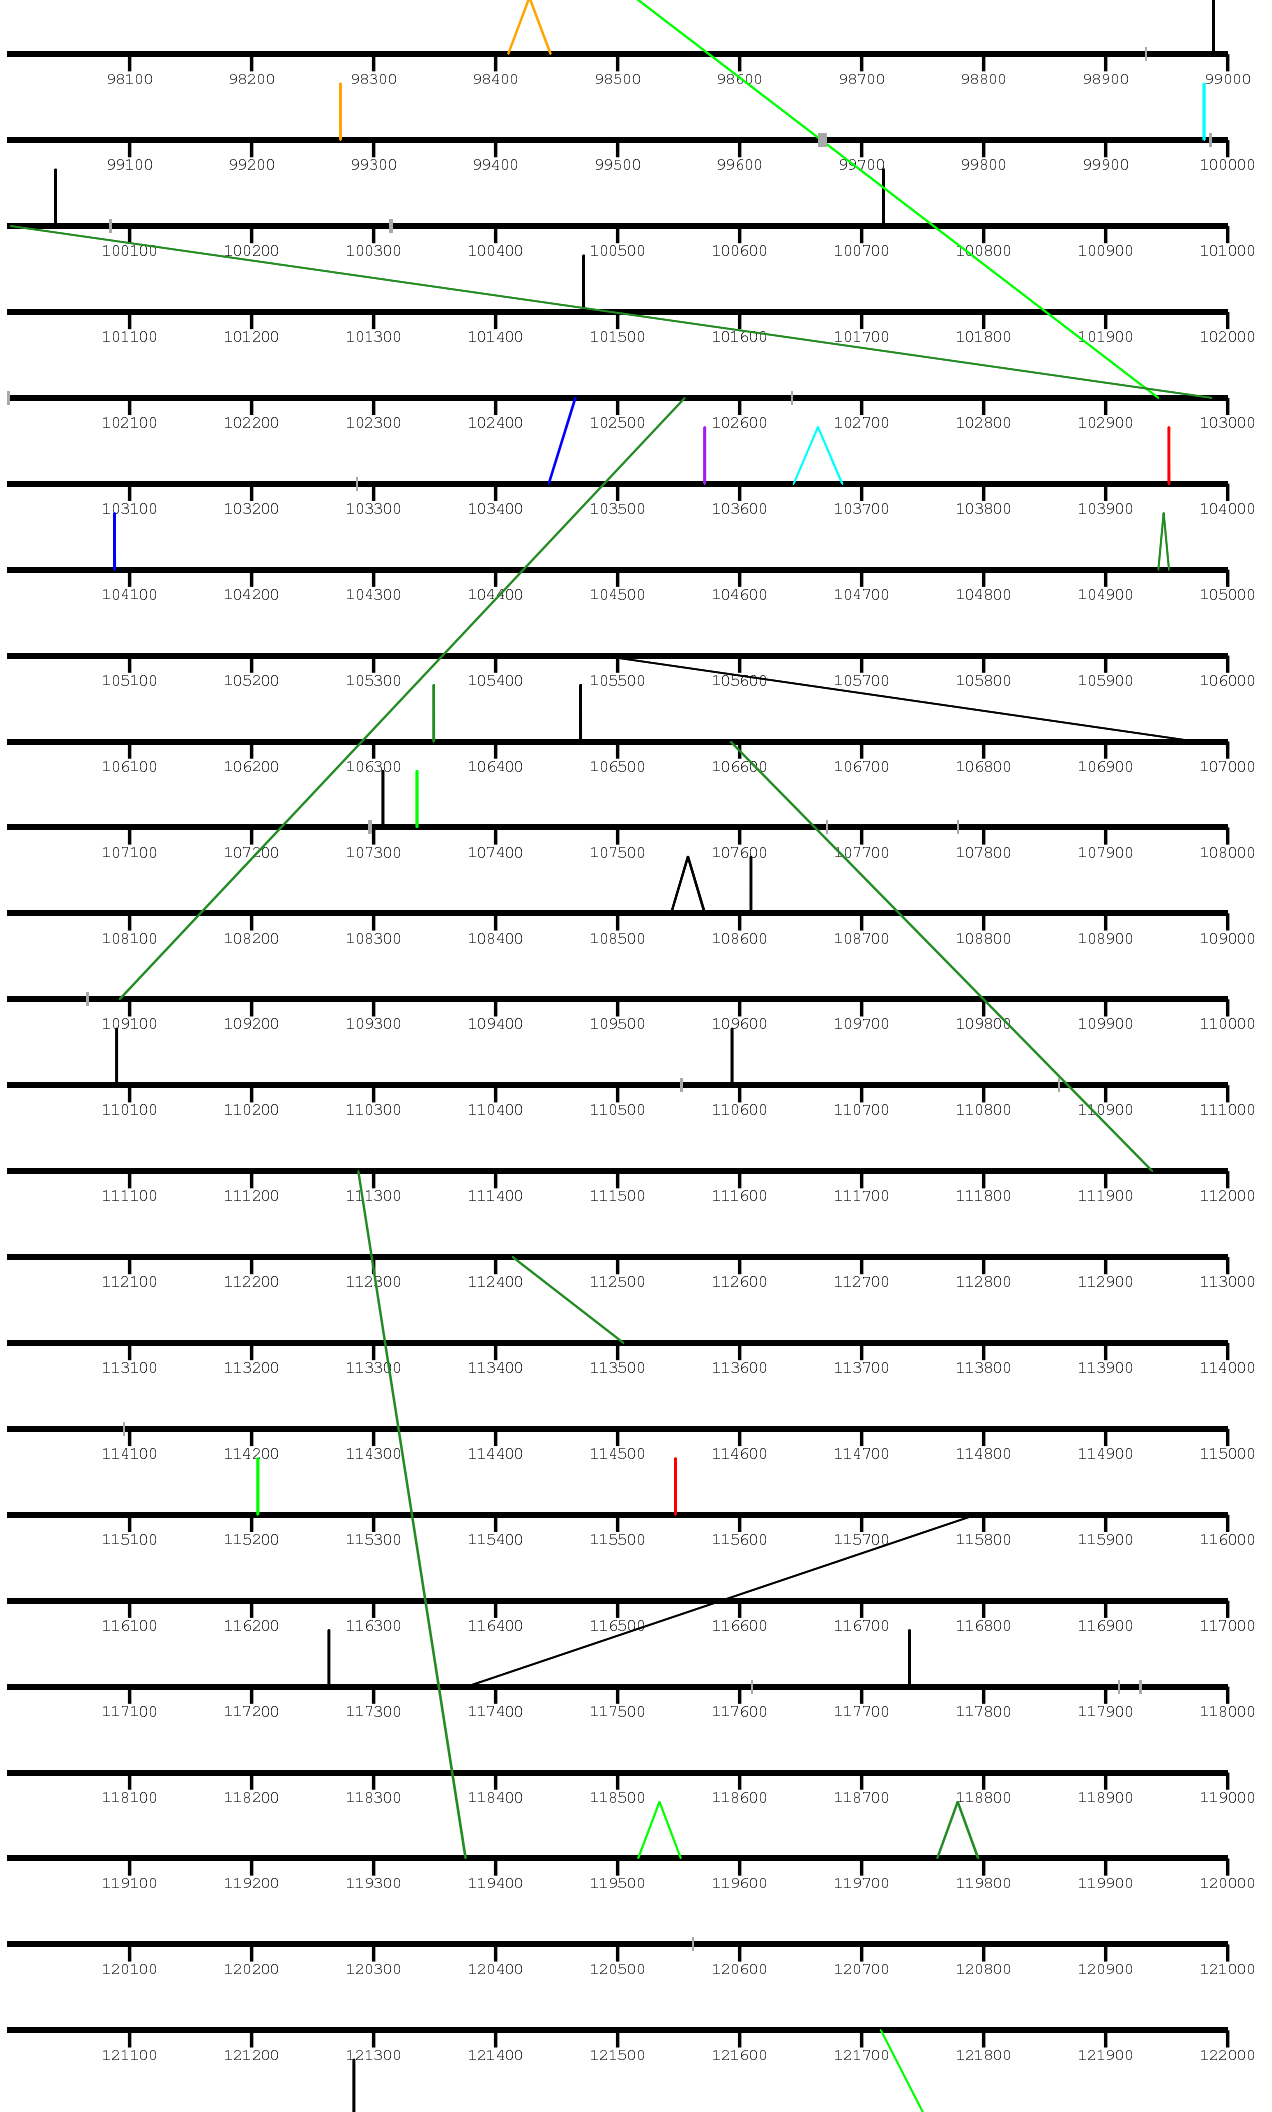

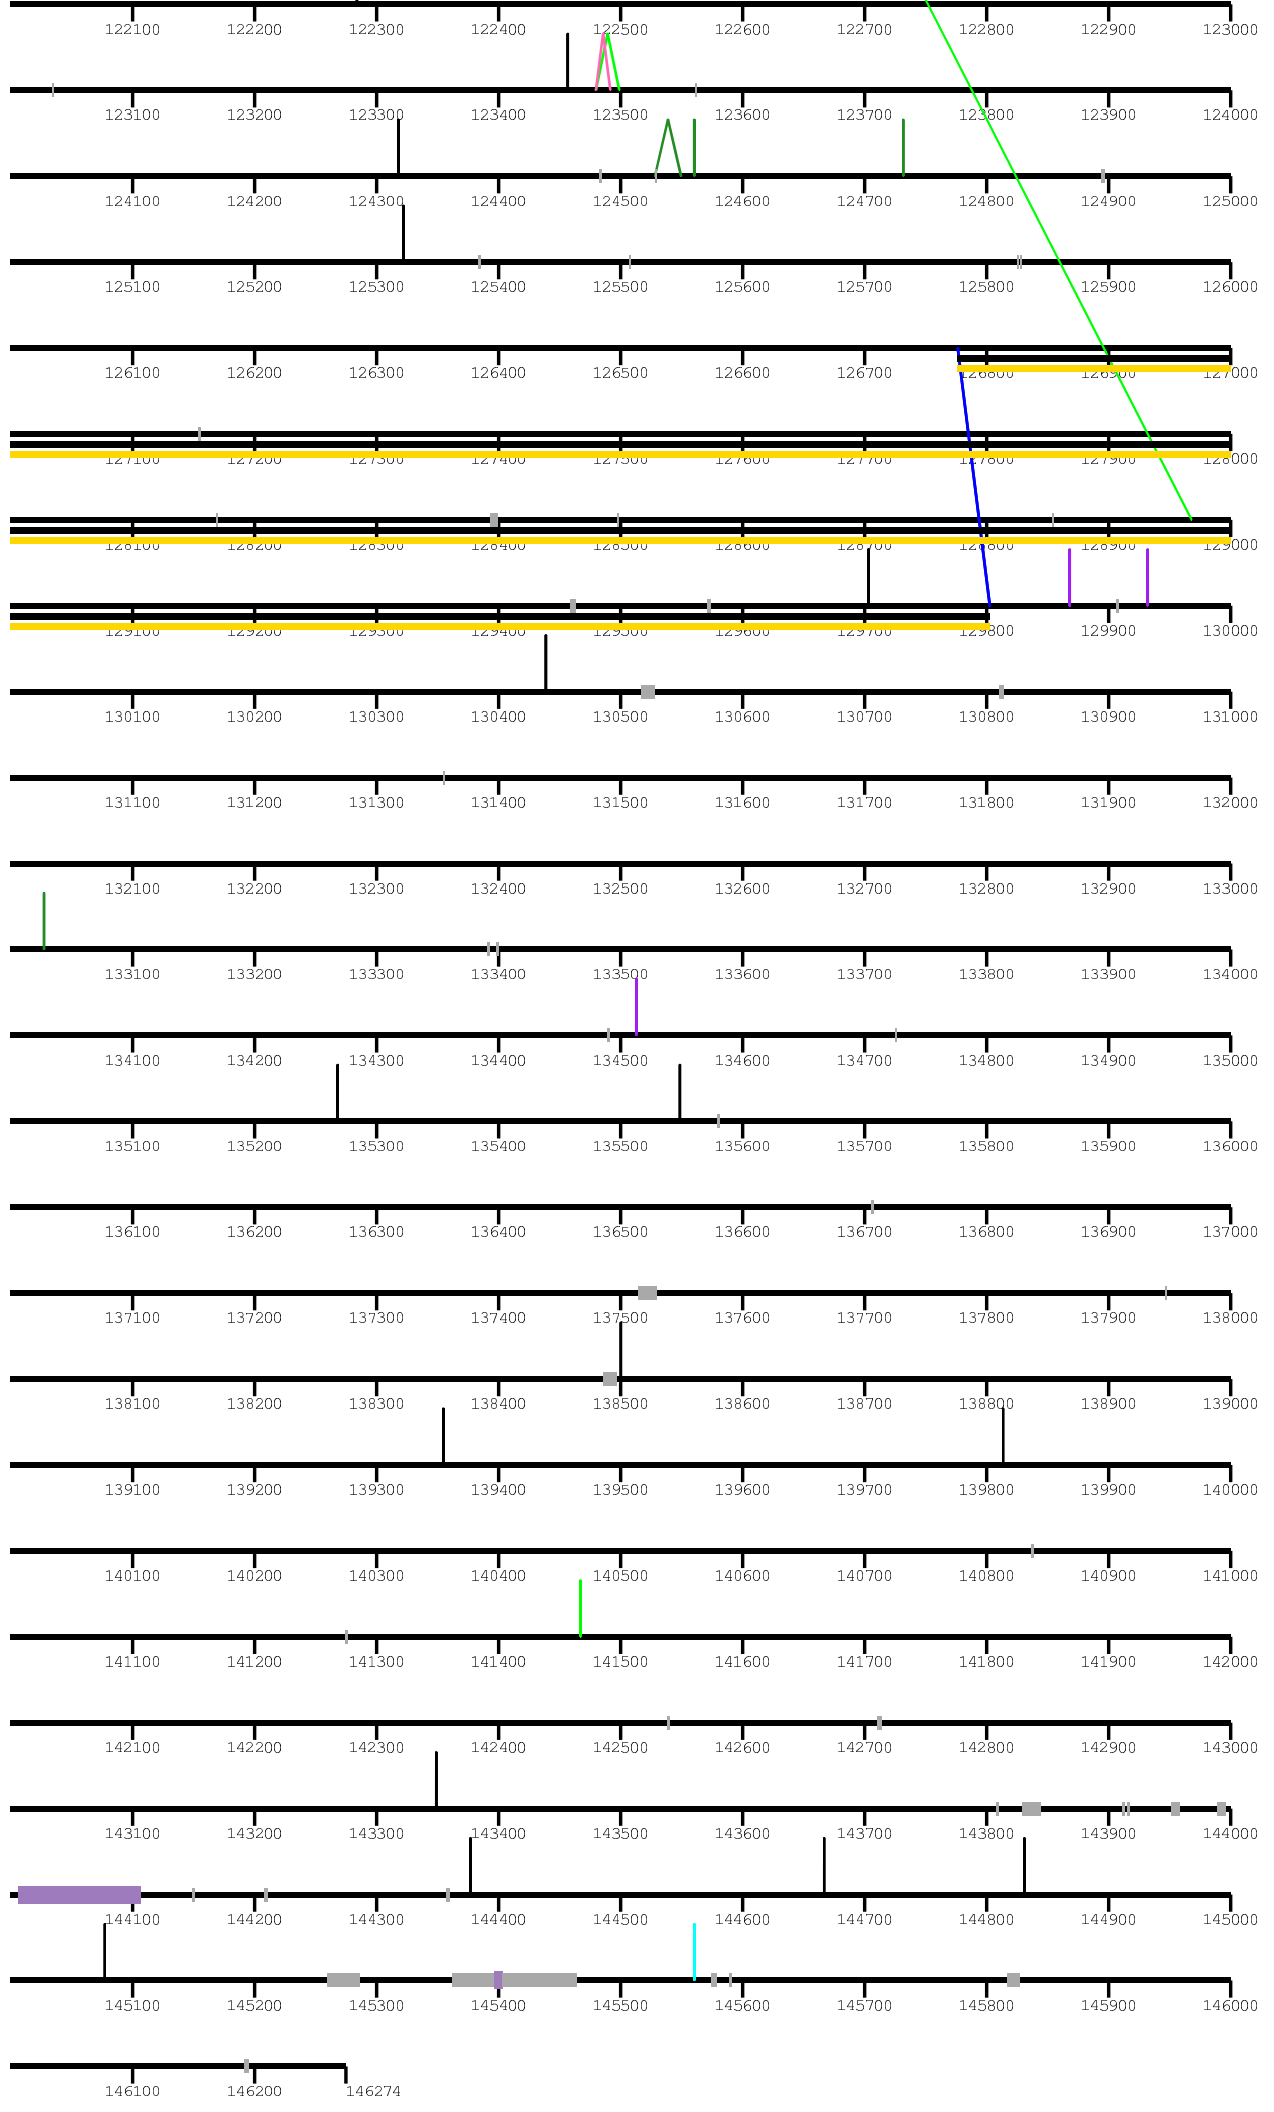



chr9

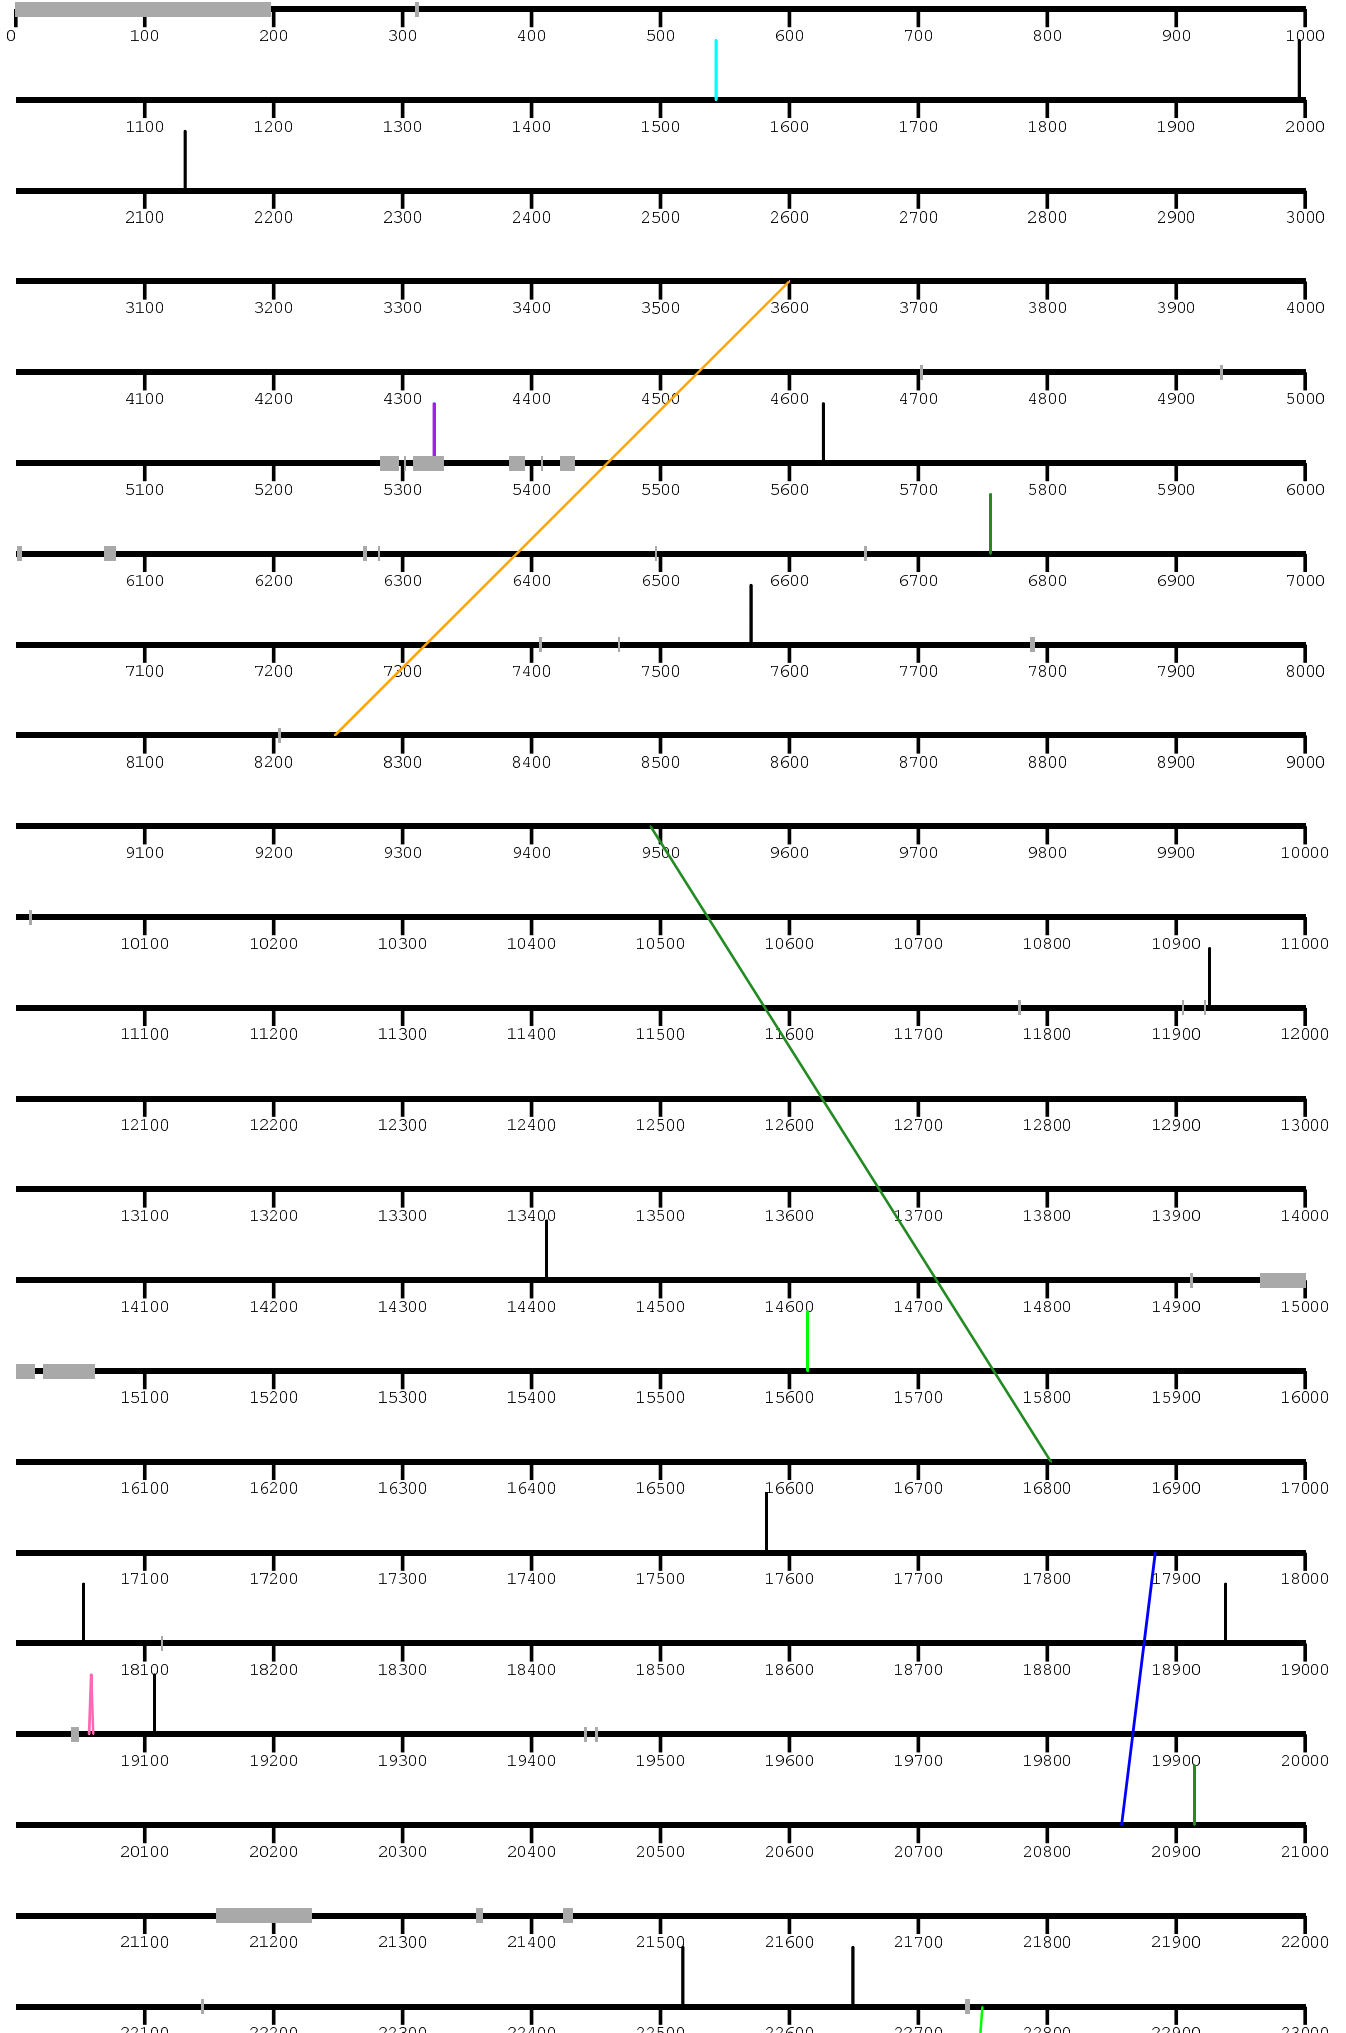

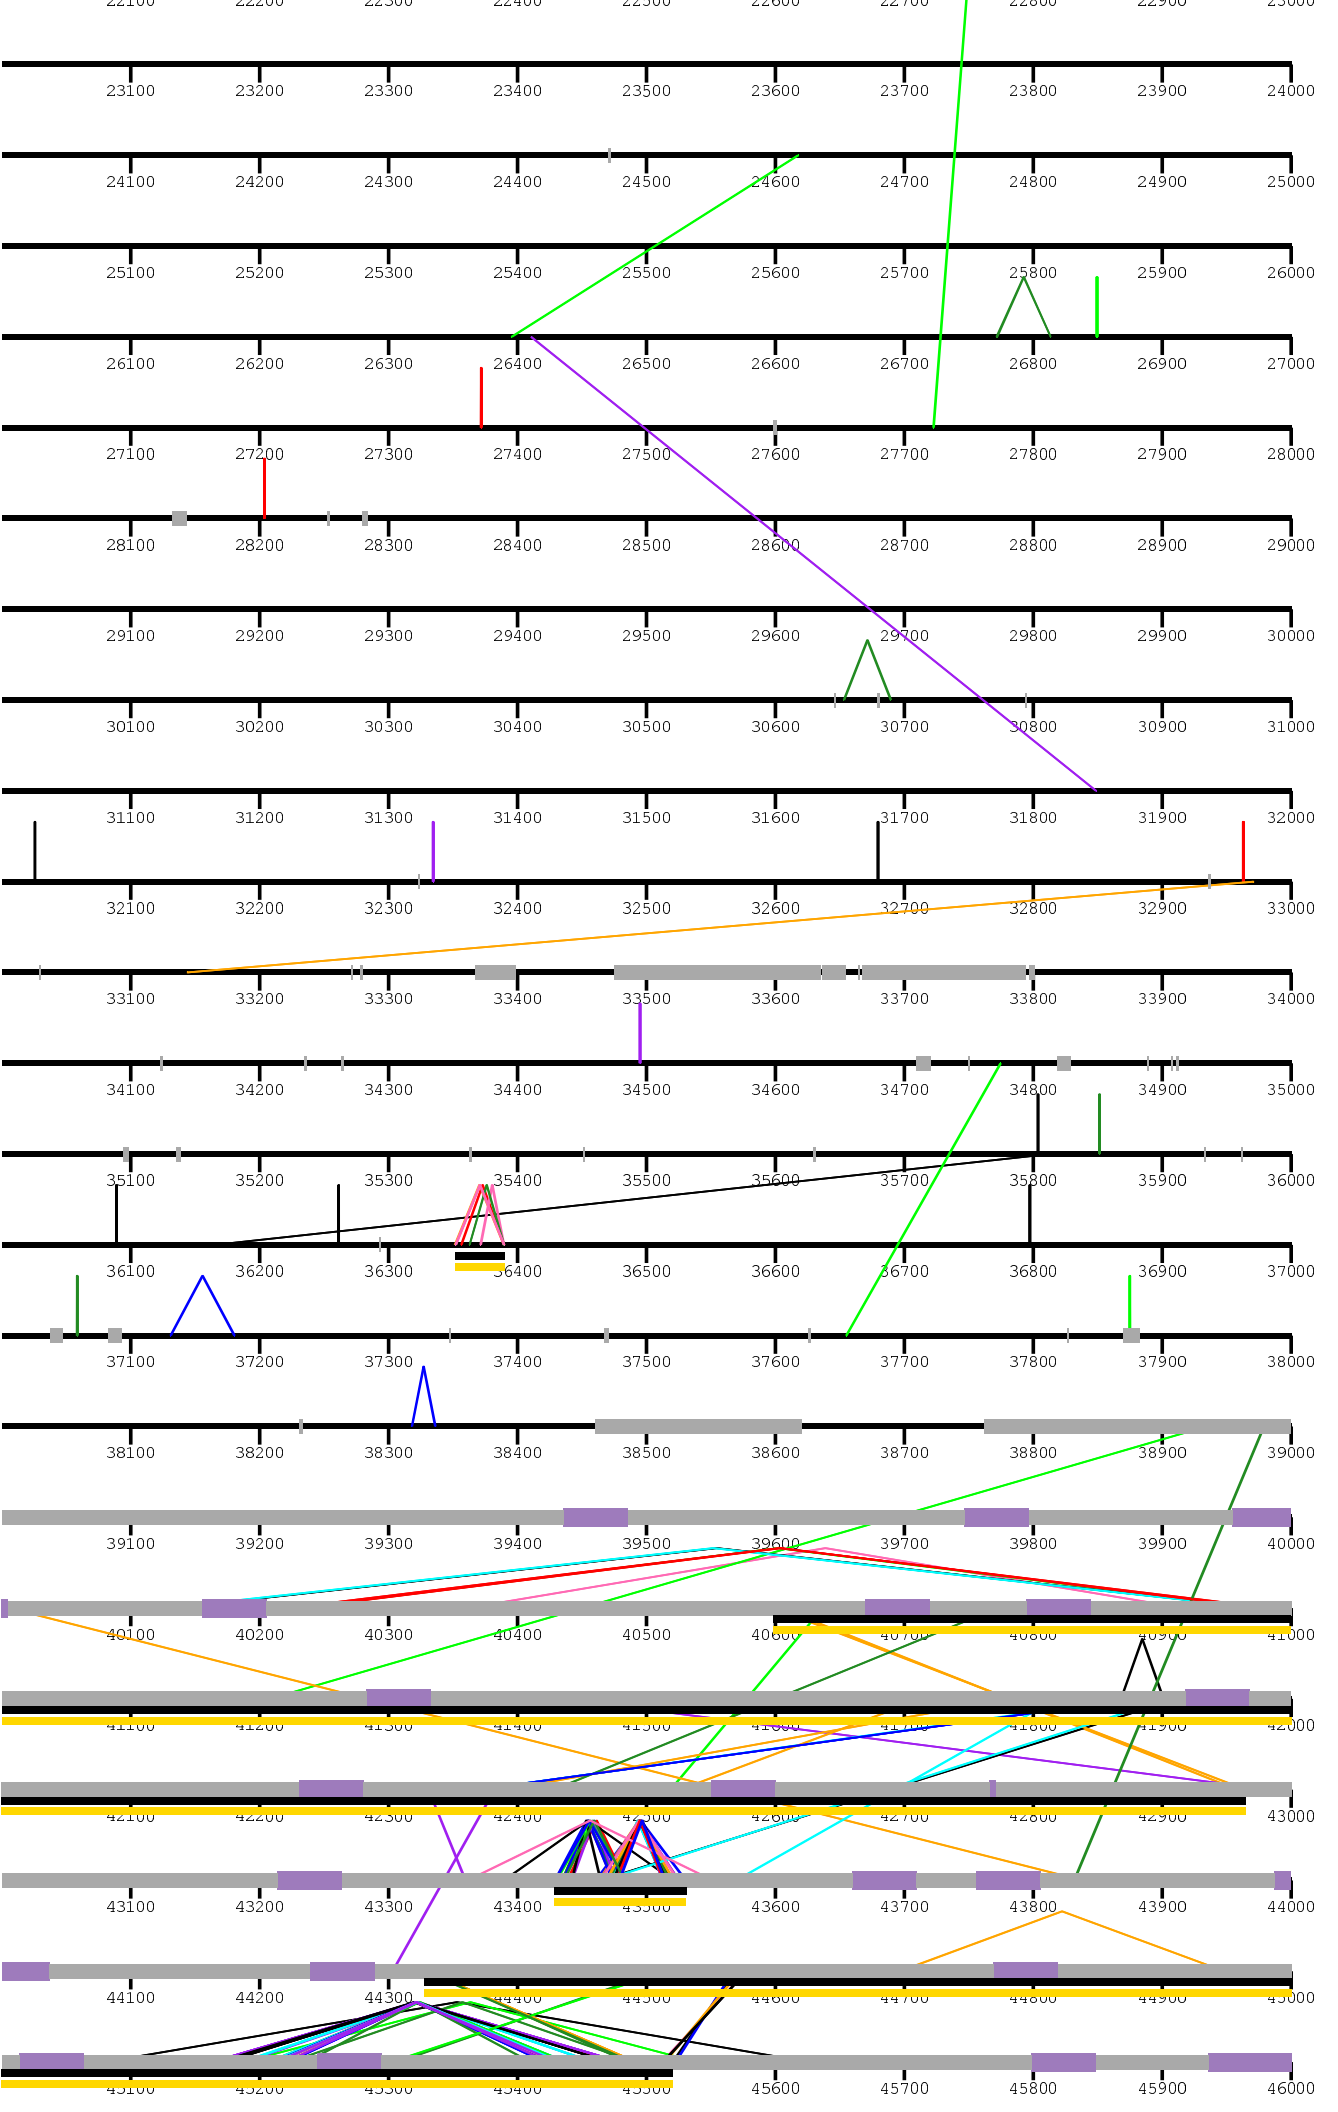

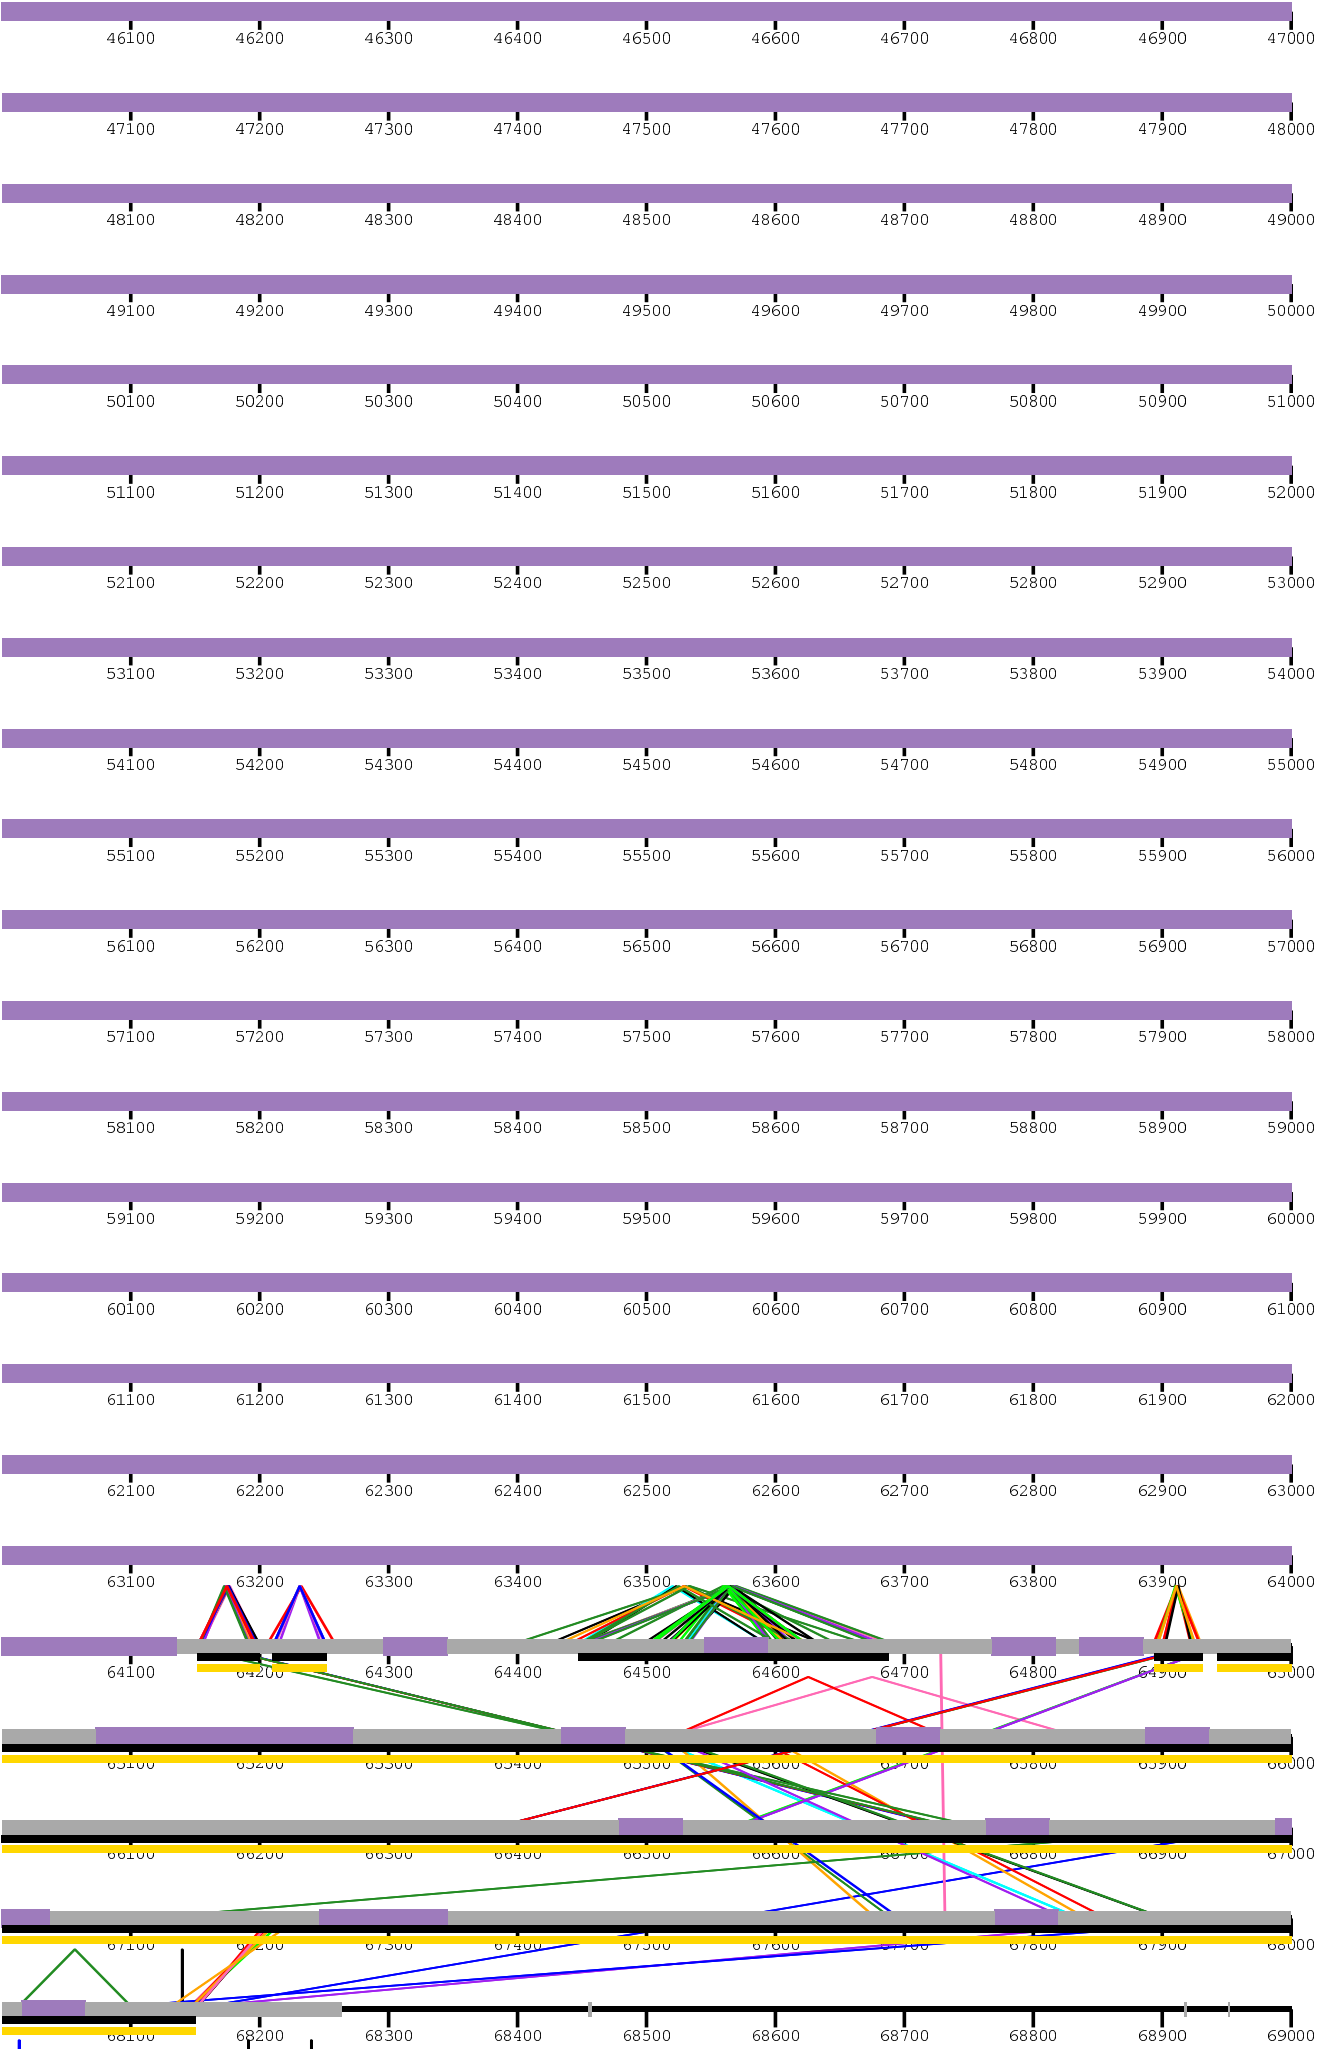

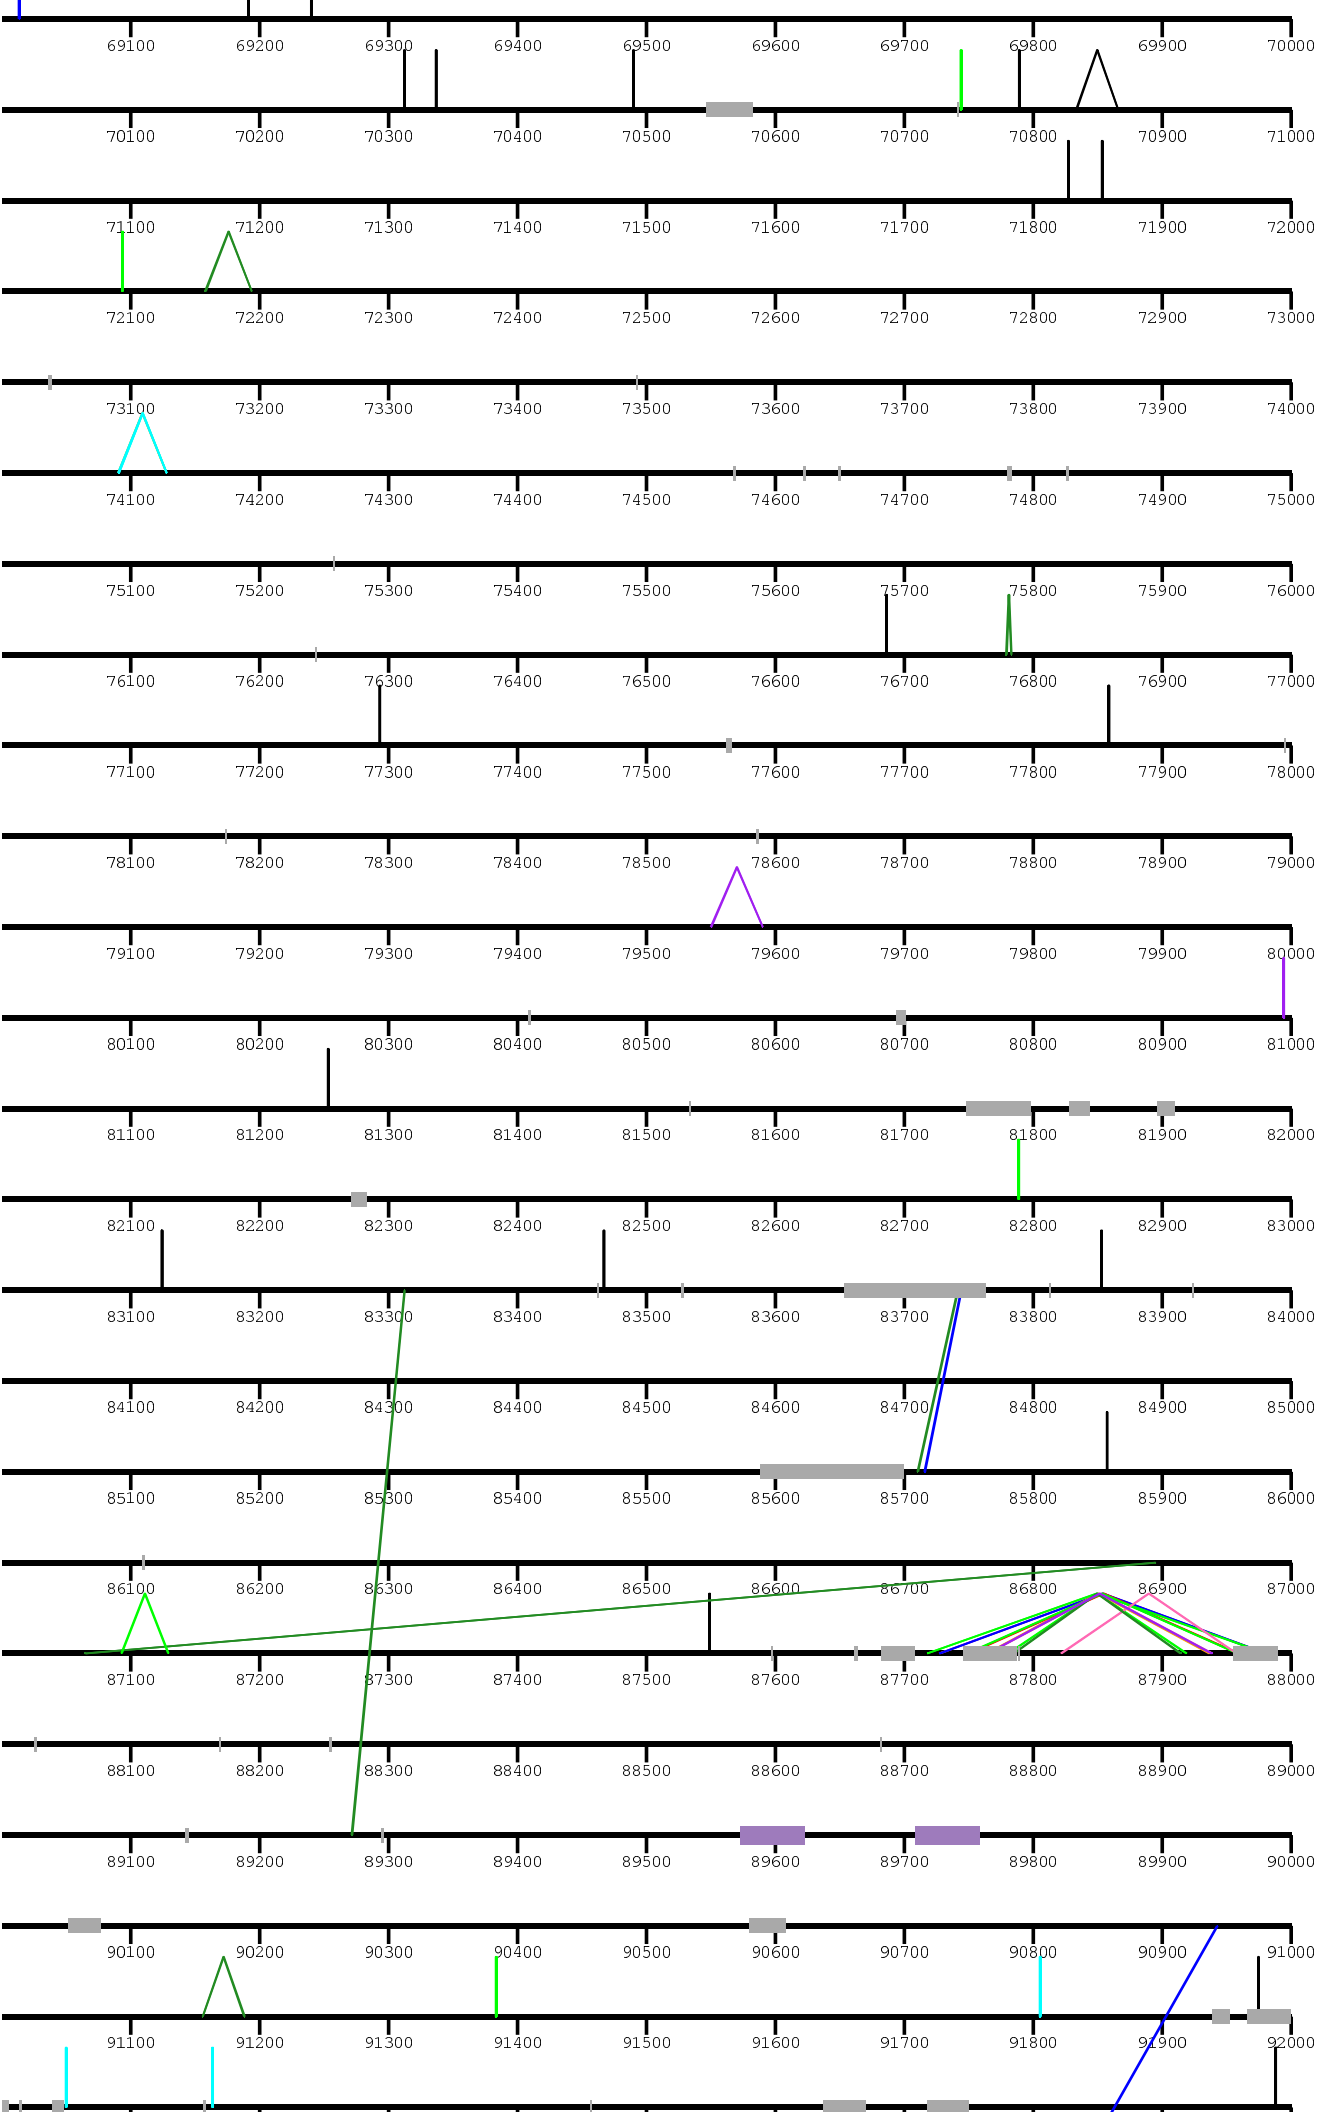

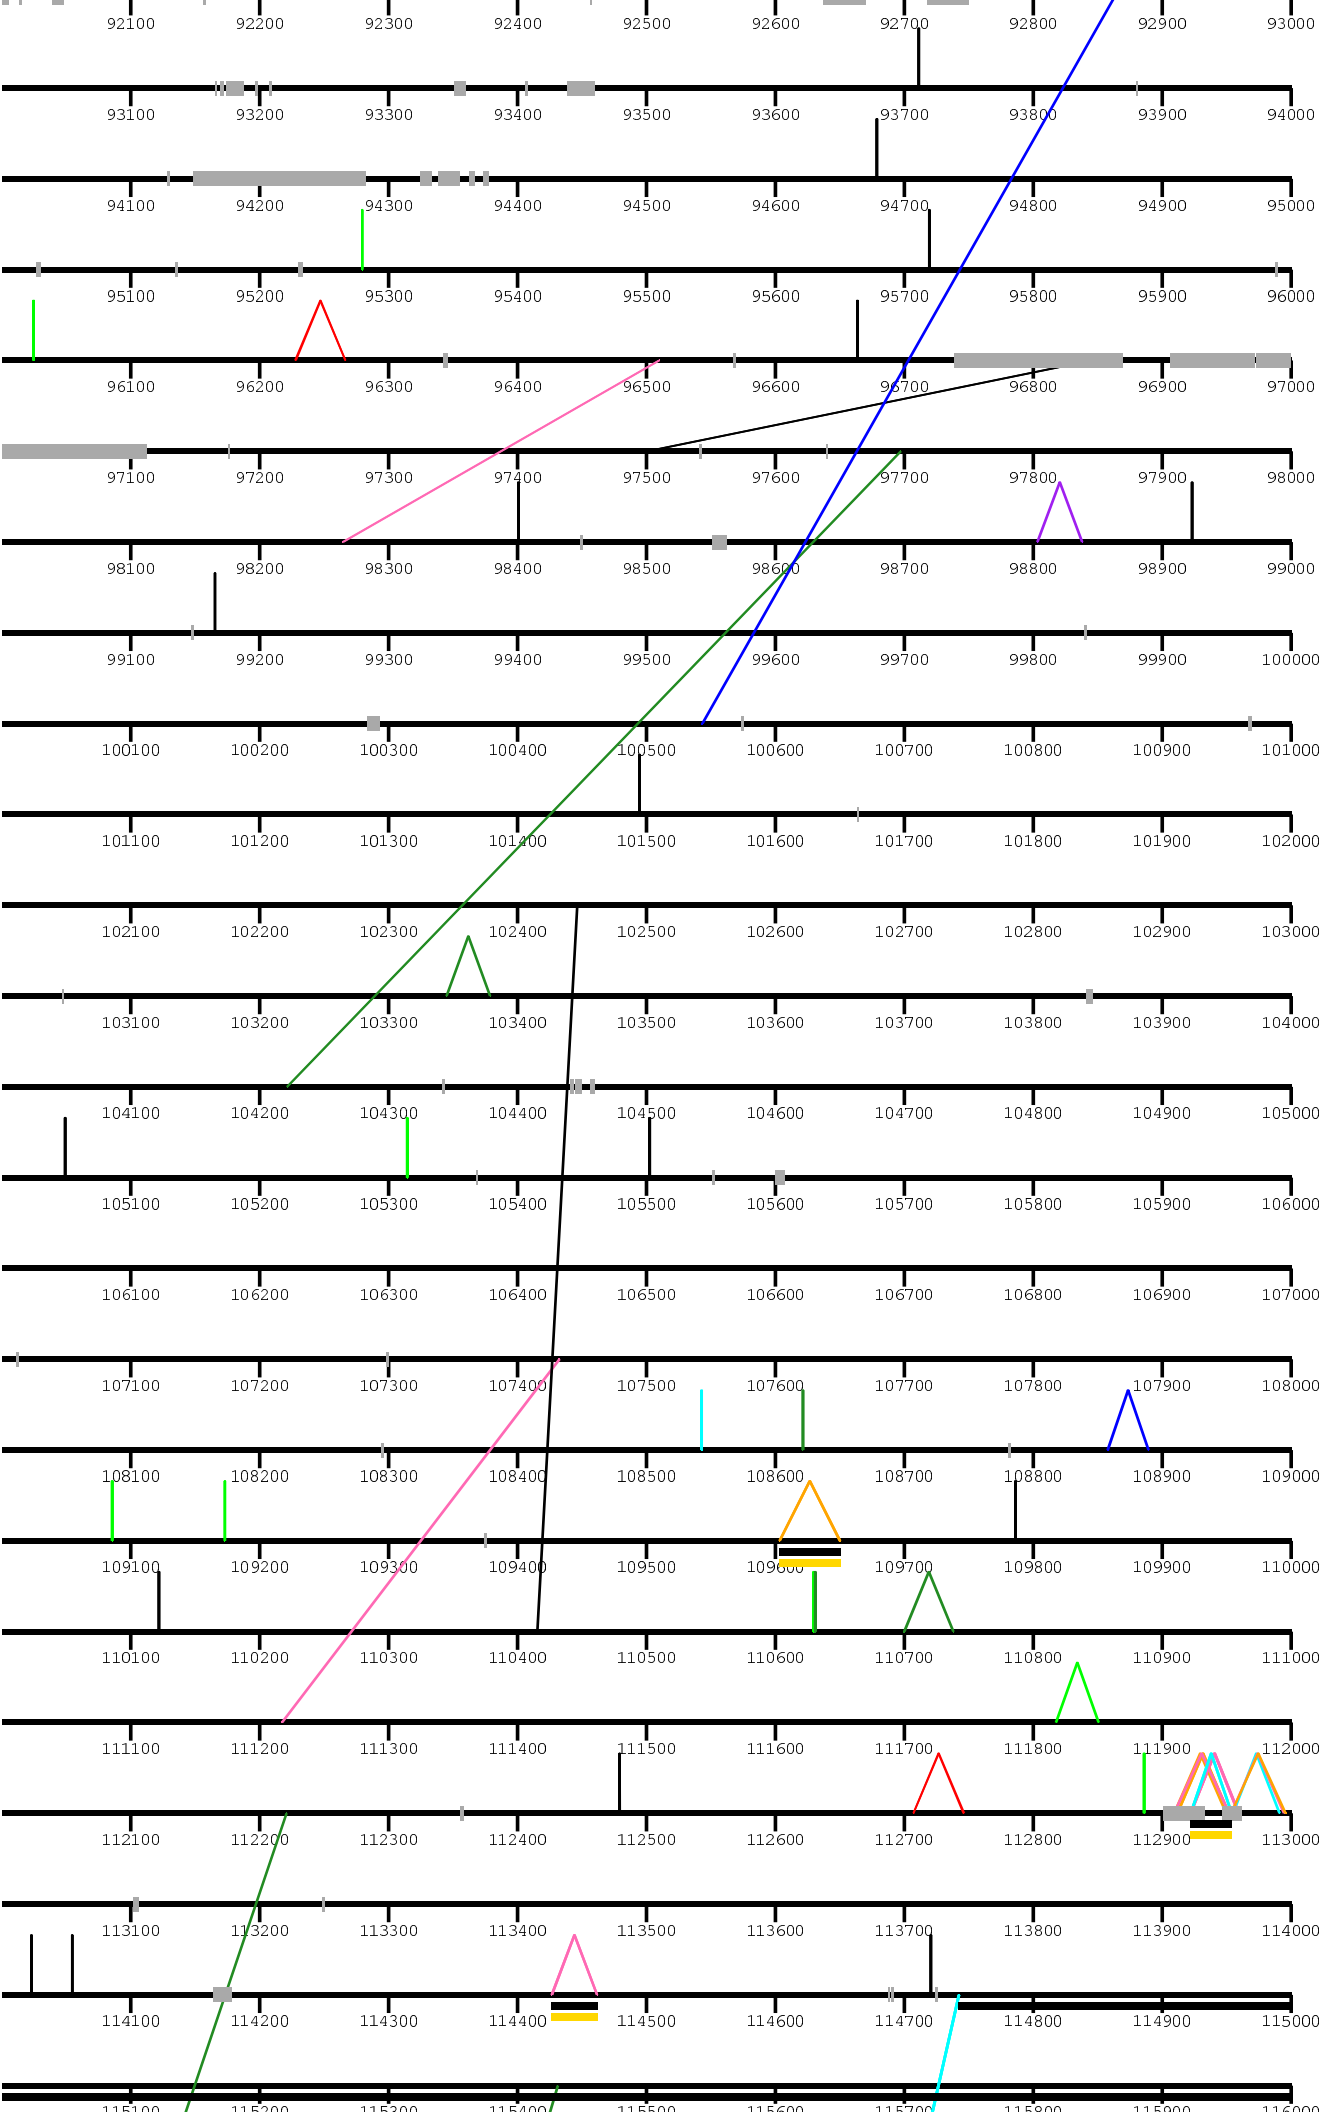

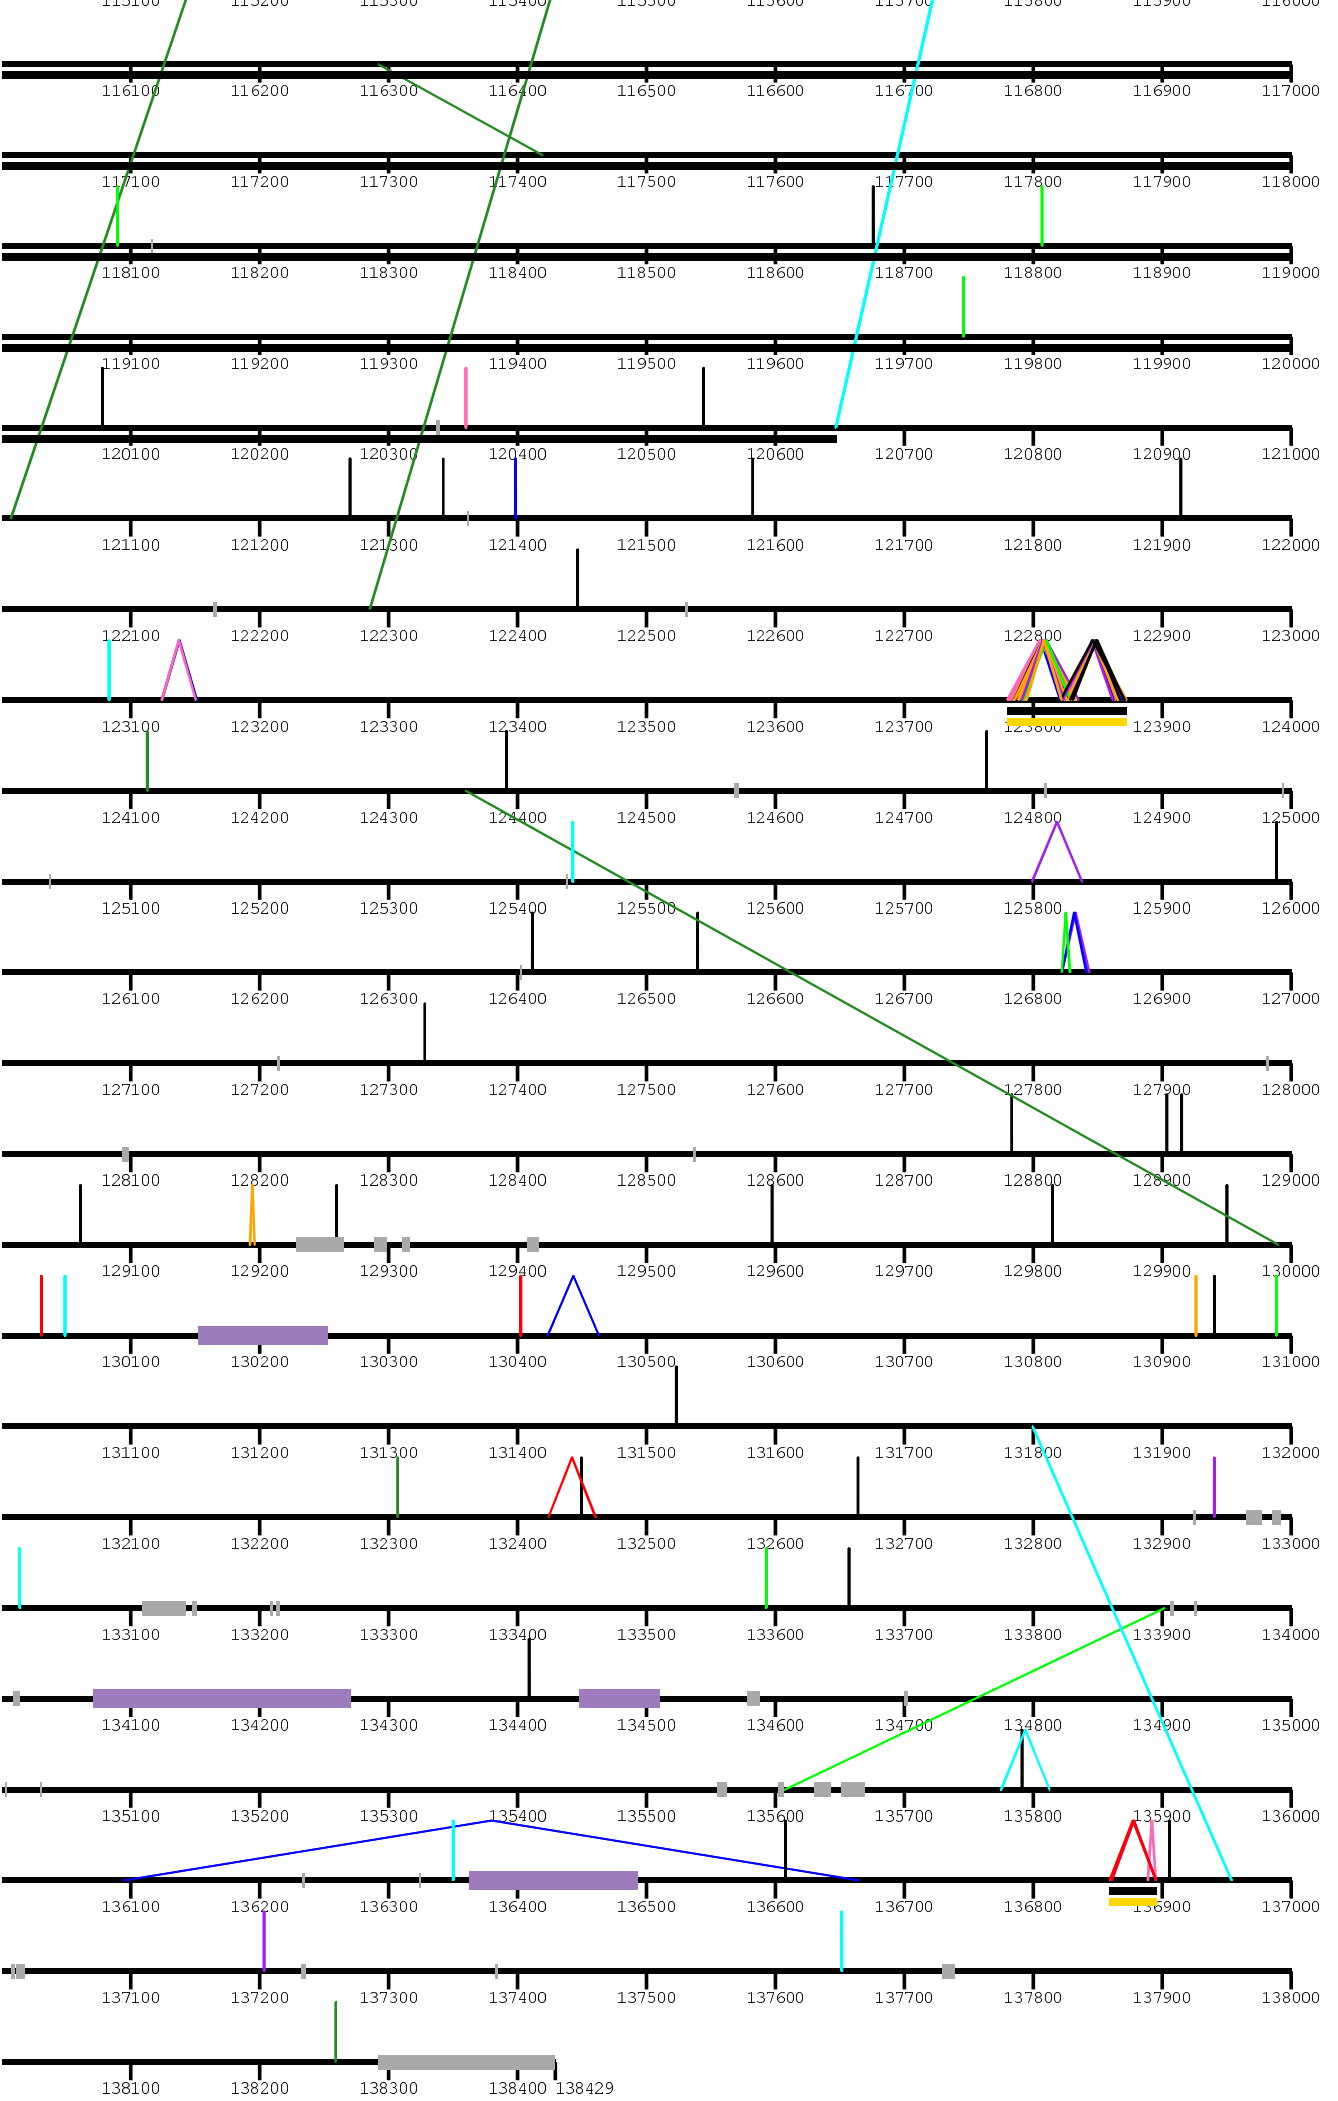

chr10

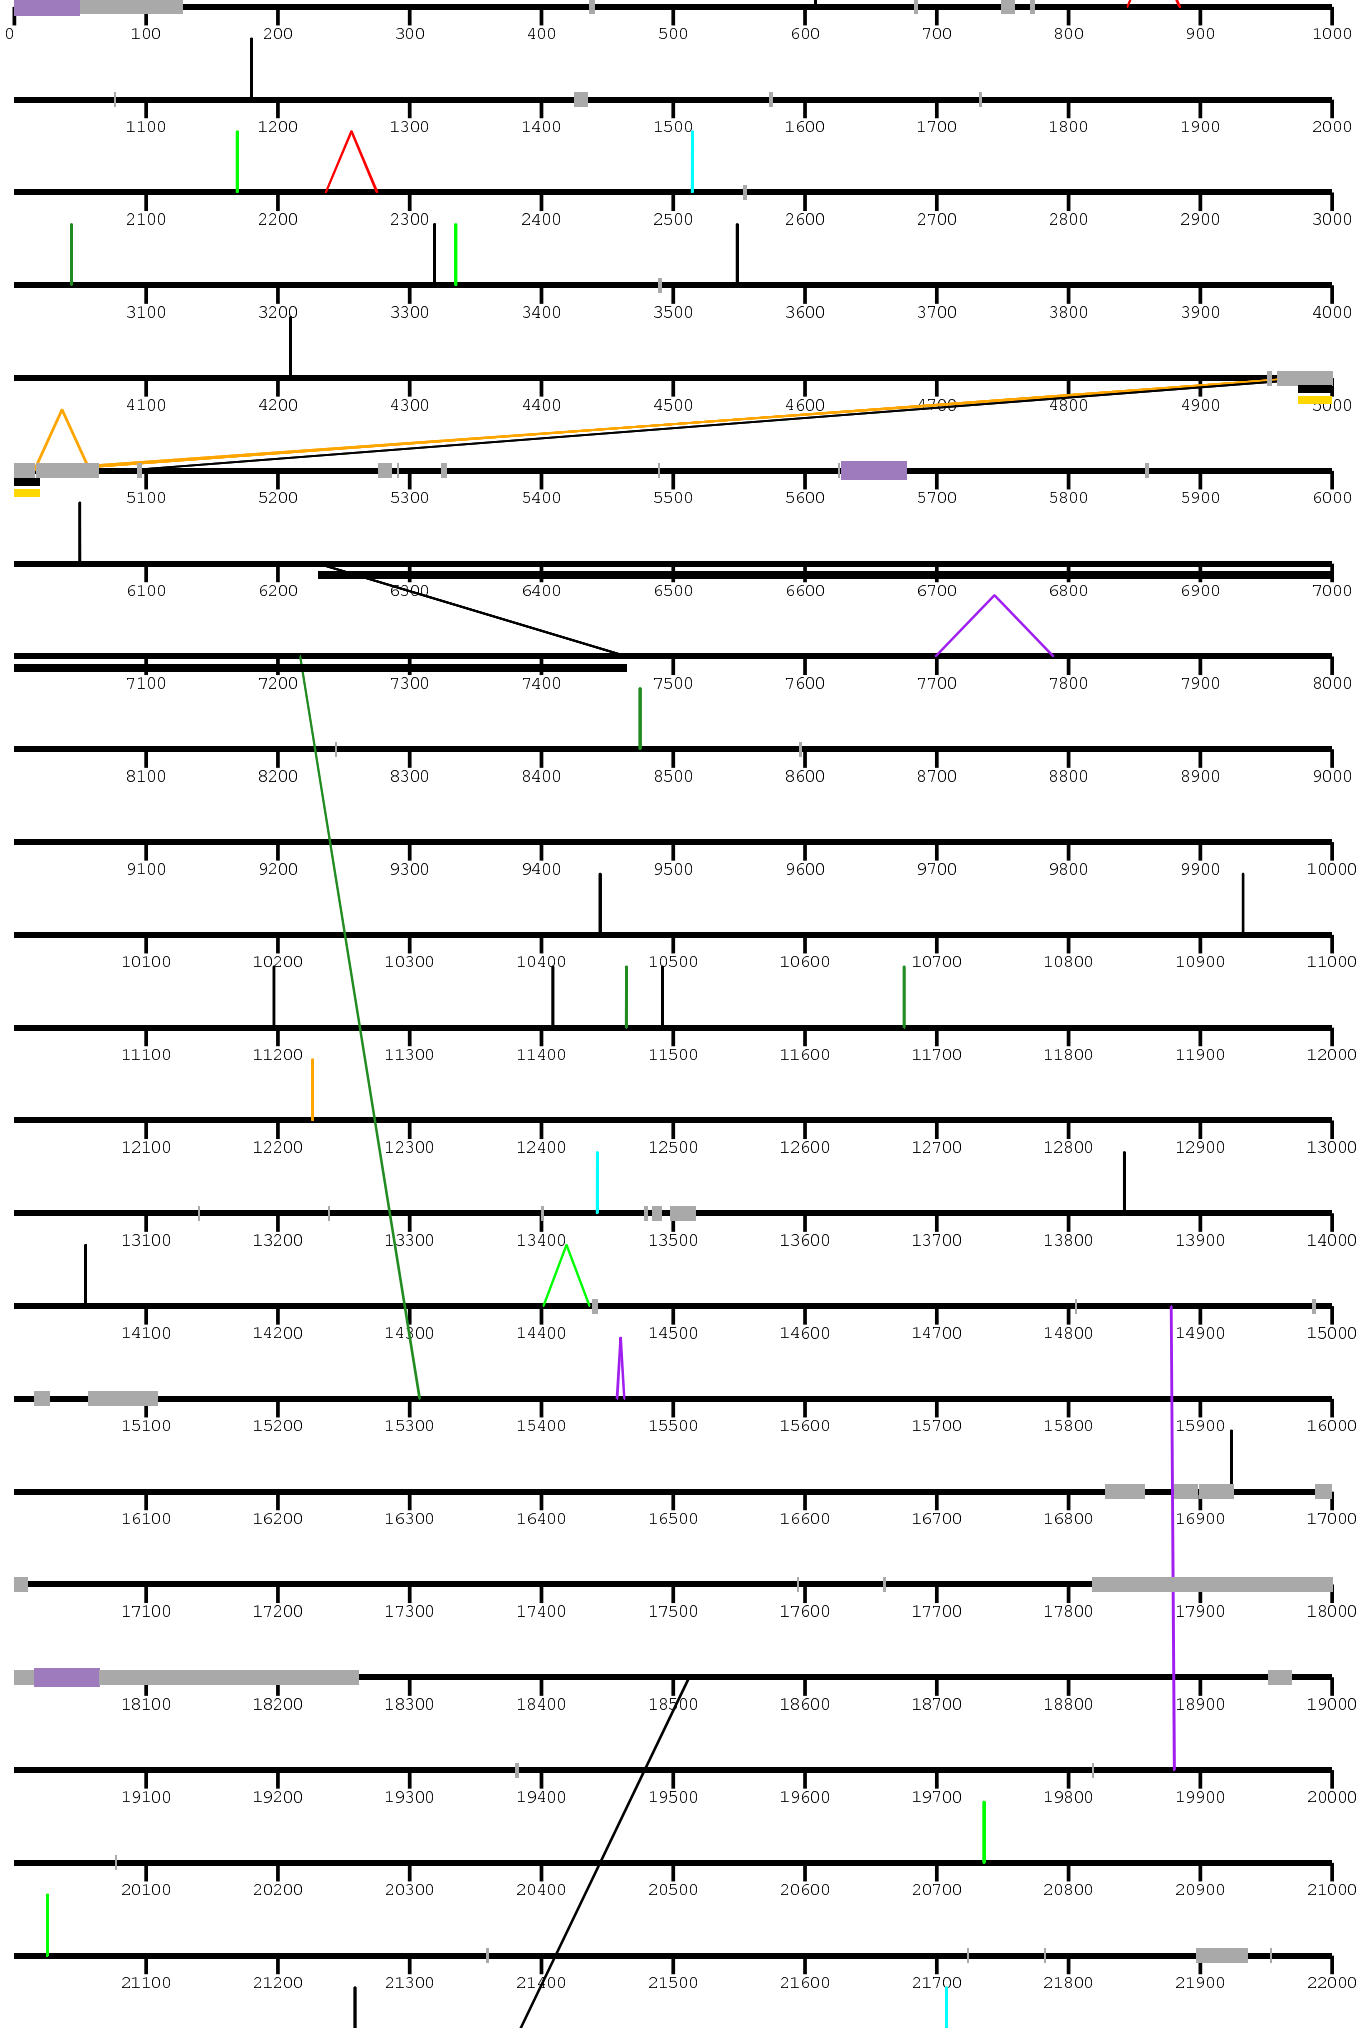

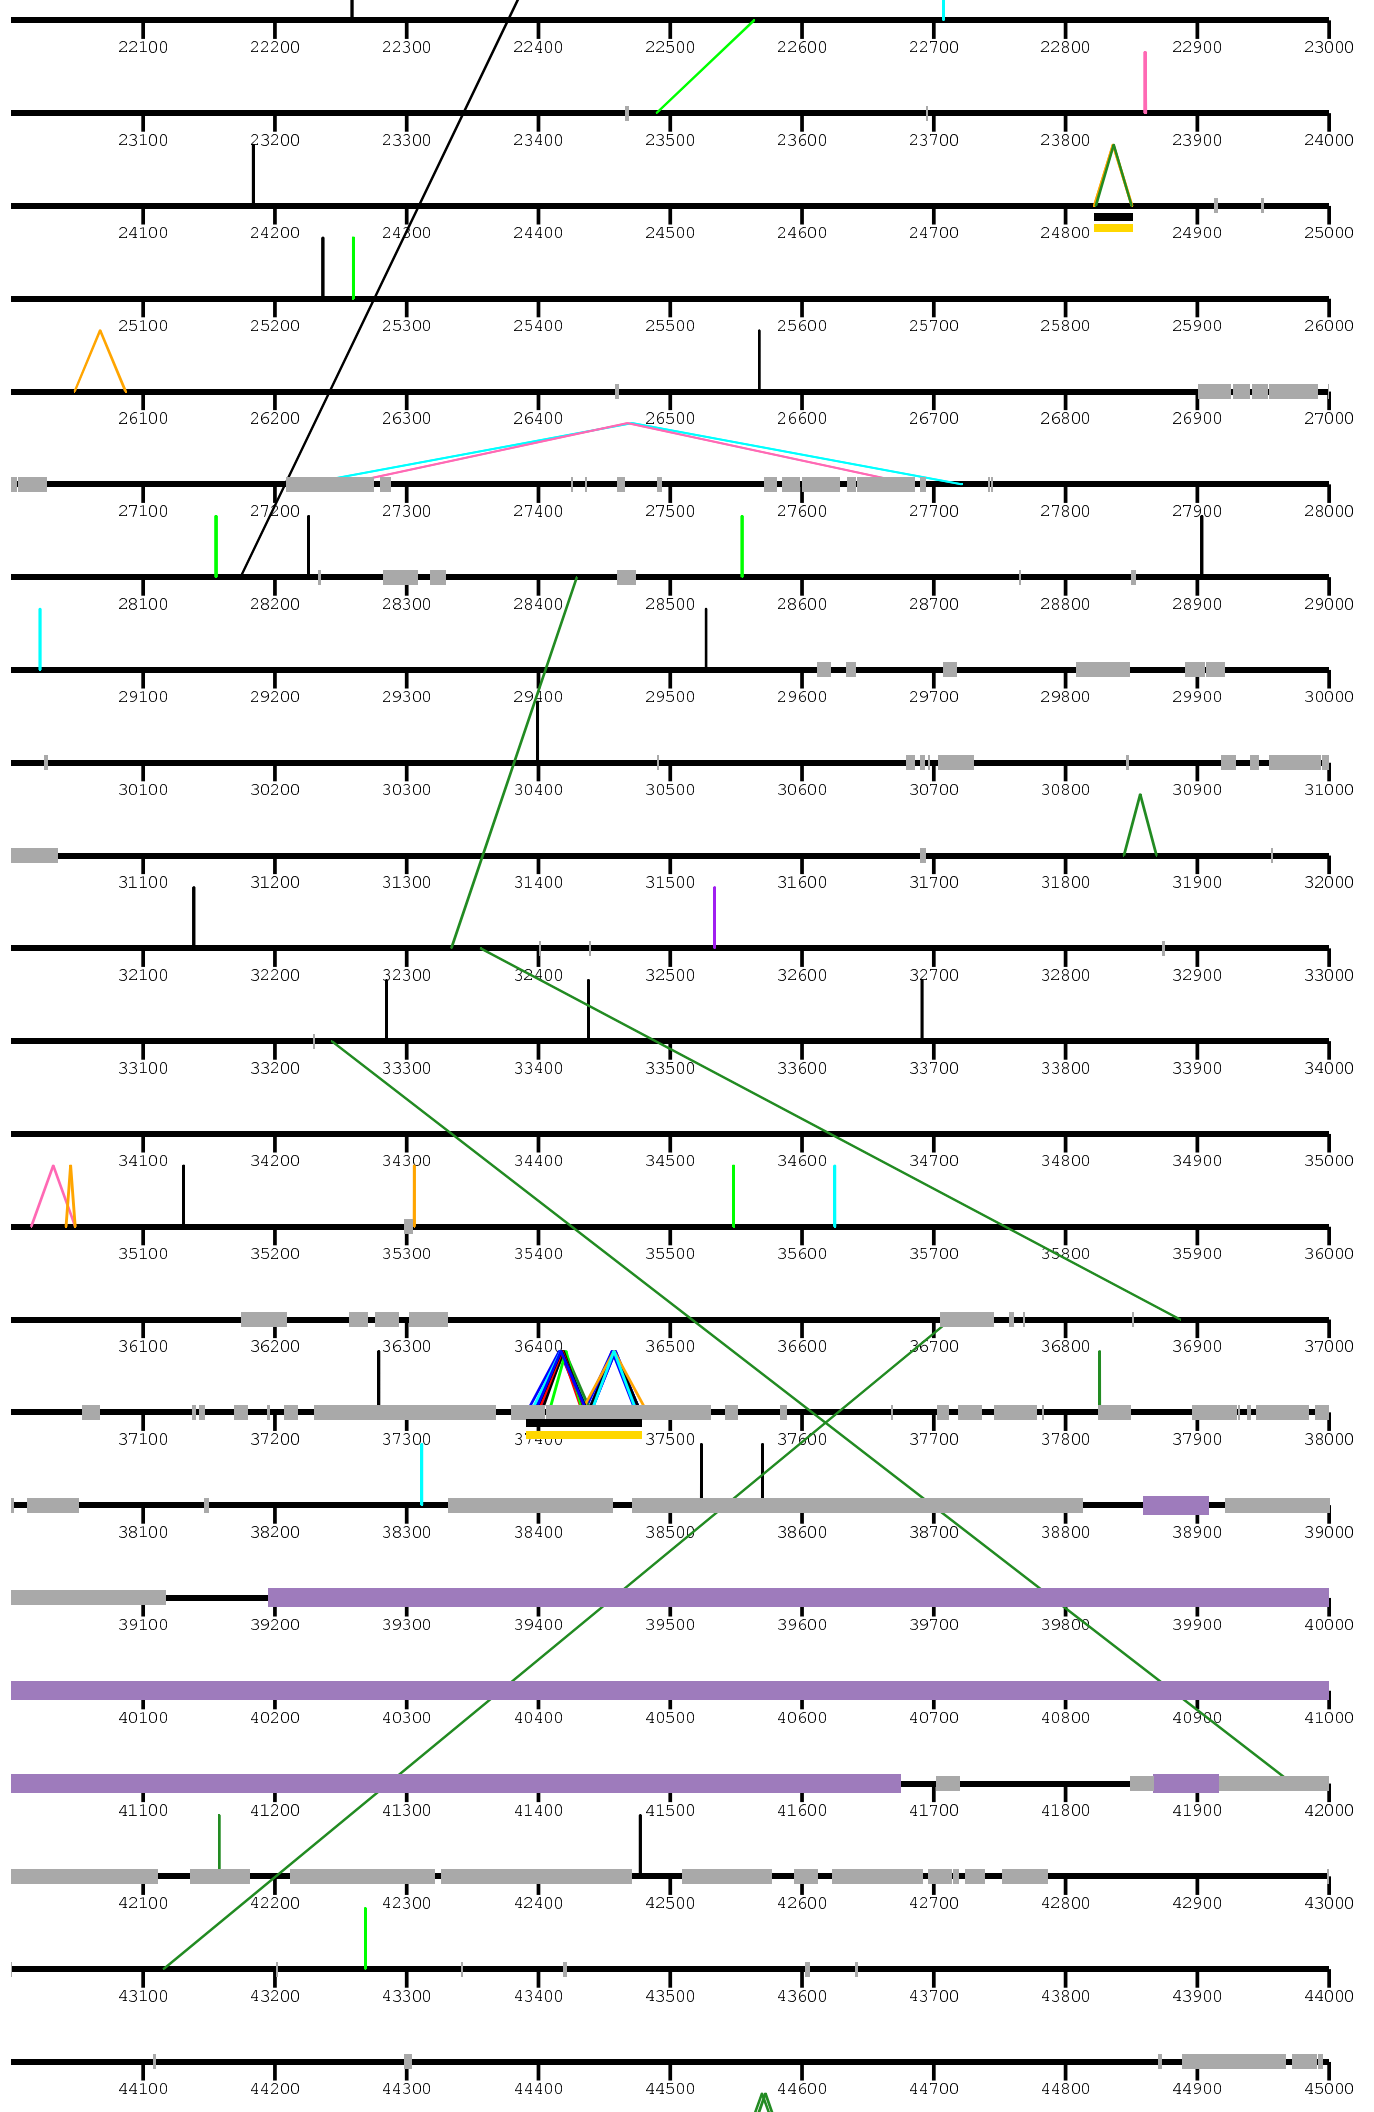



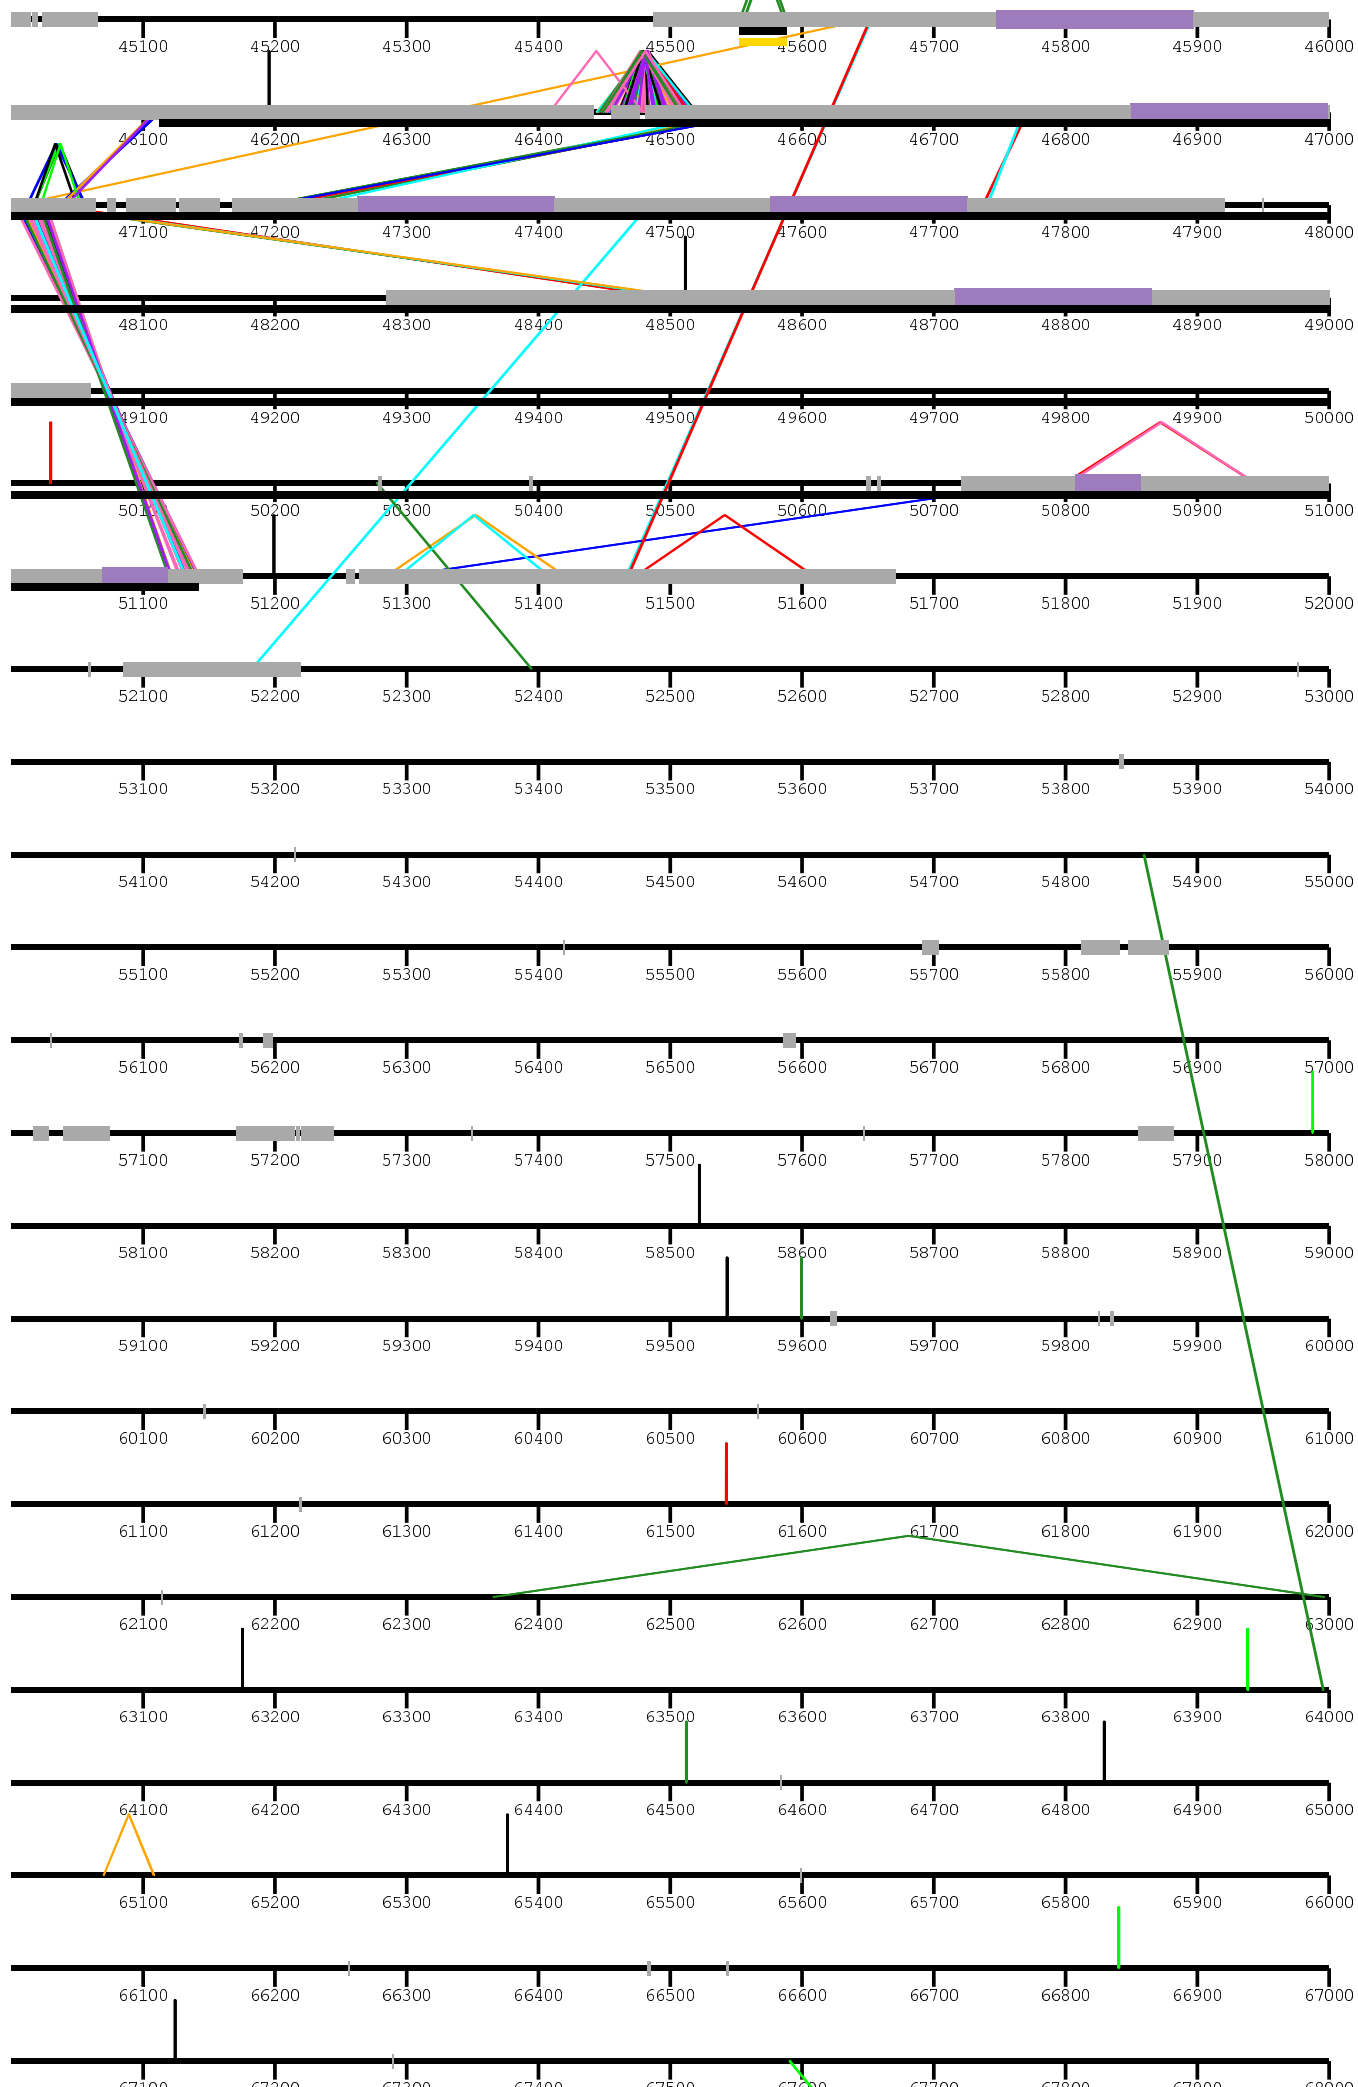

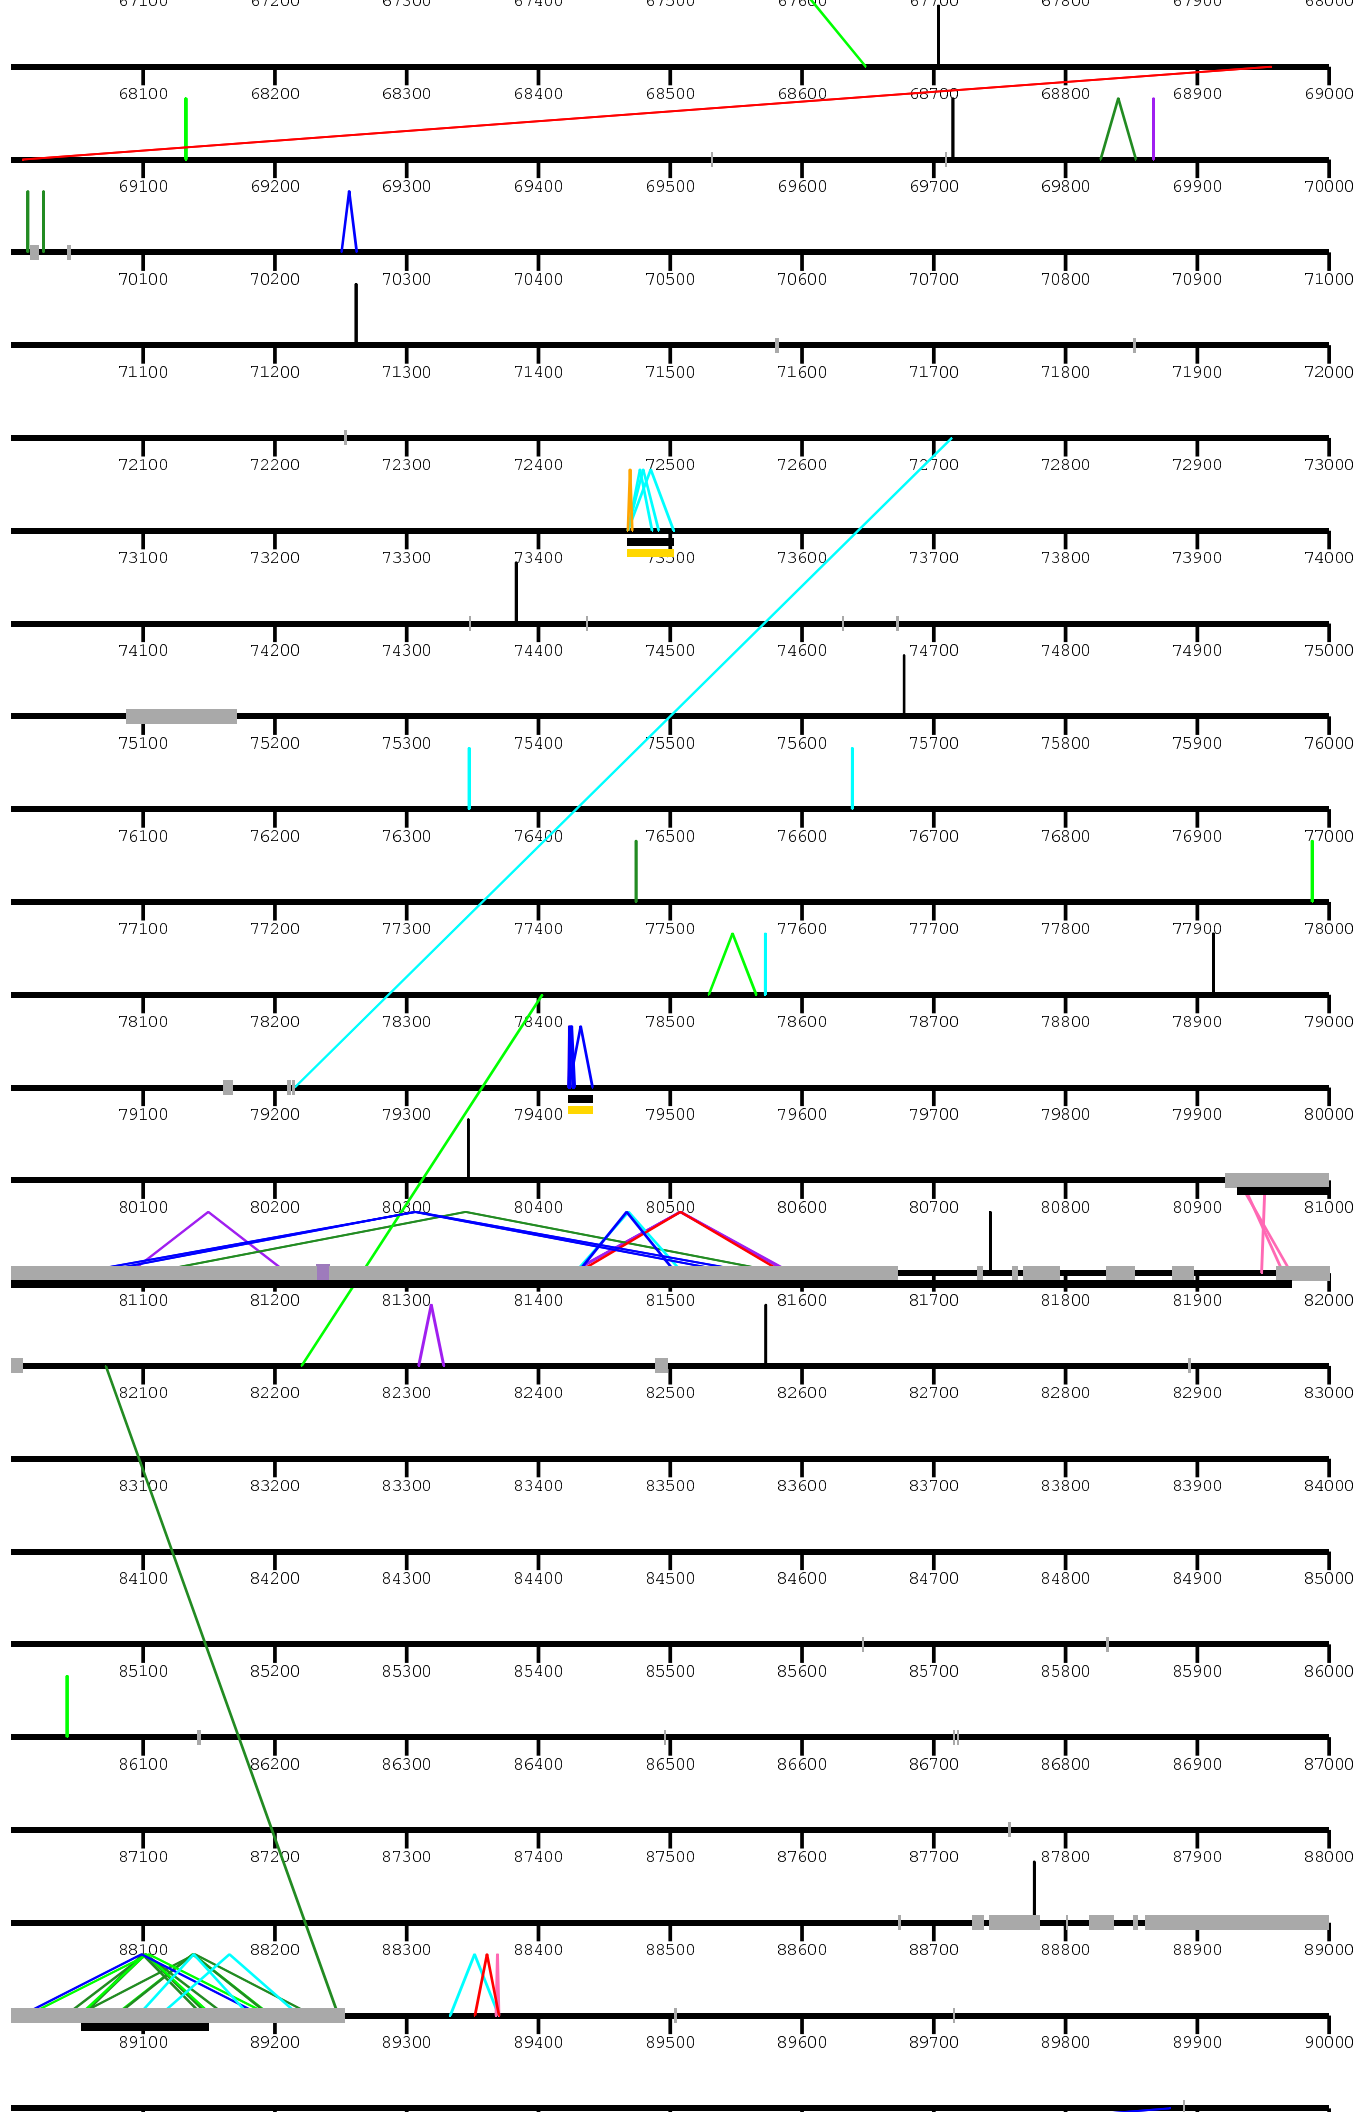

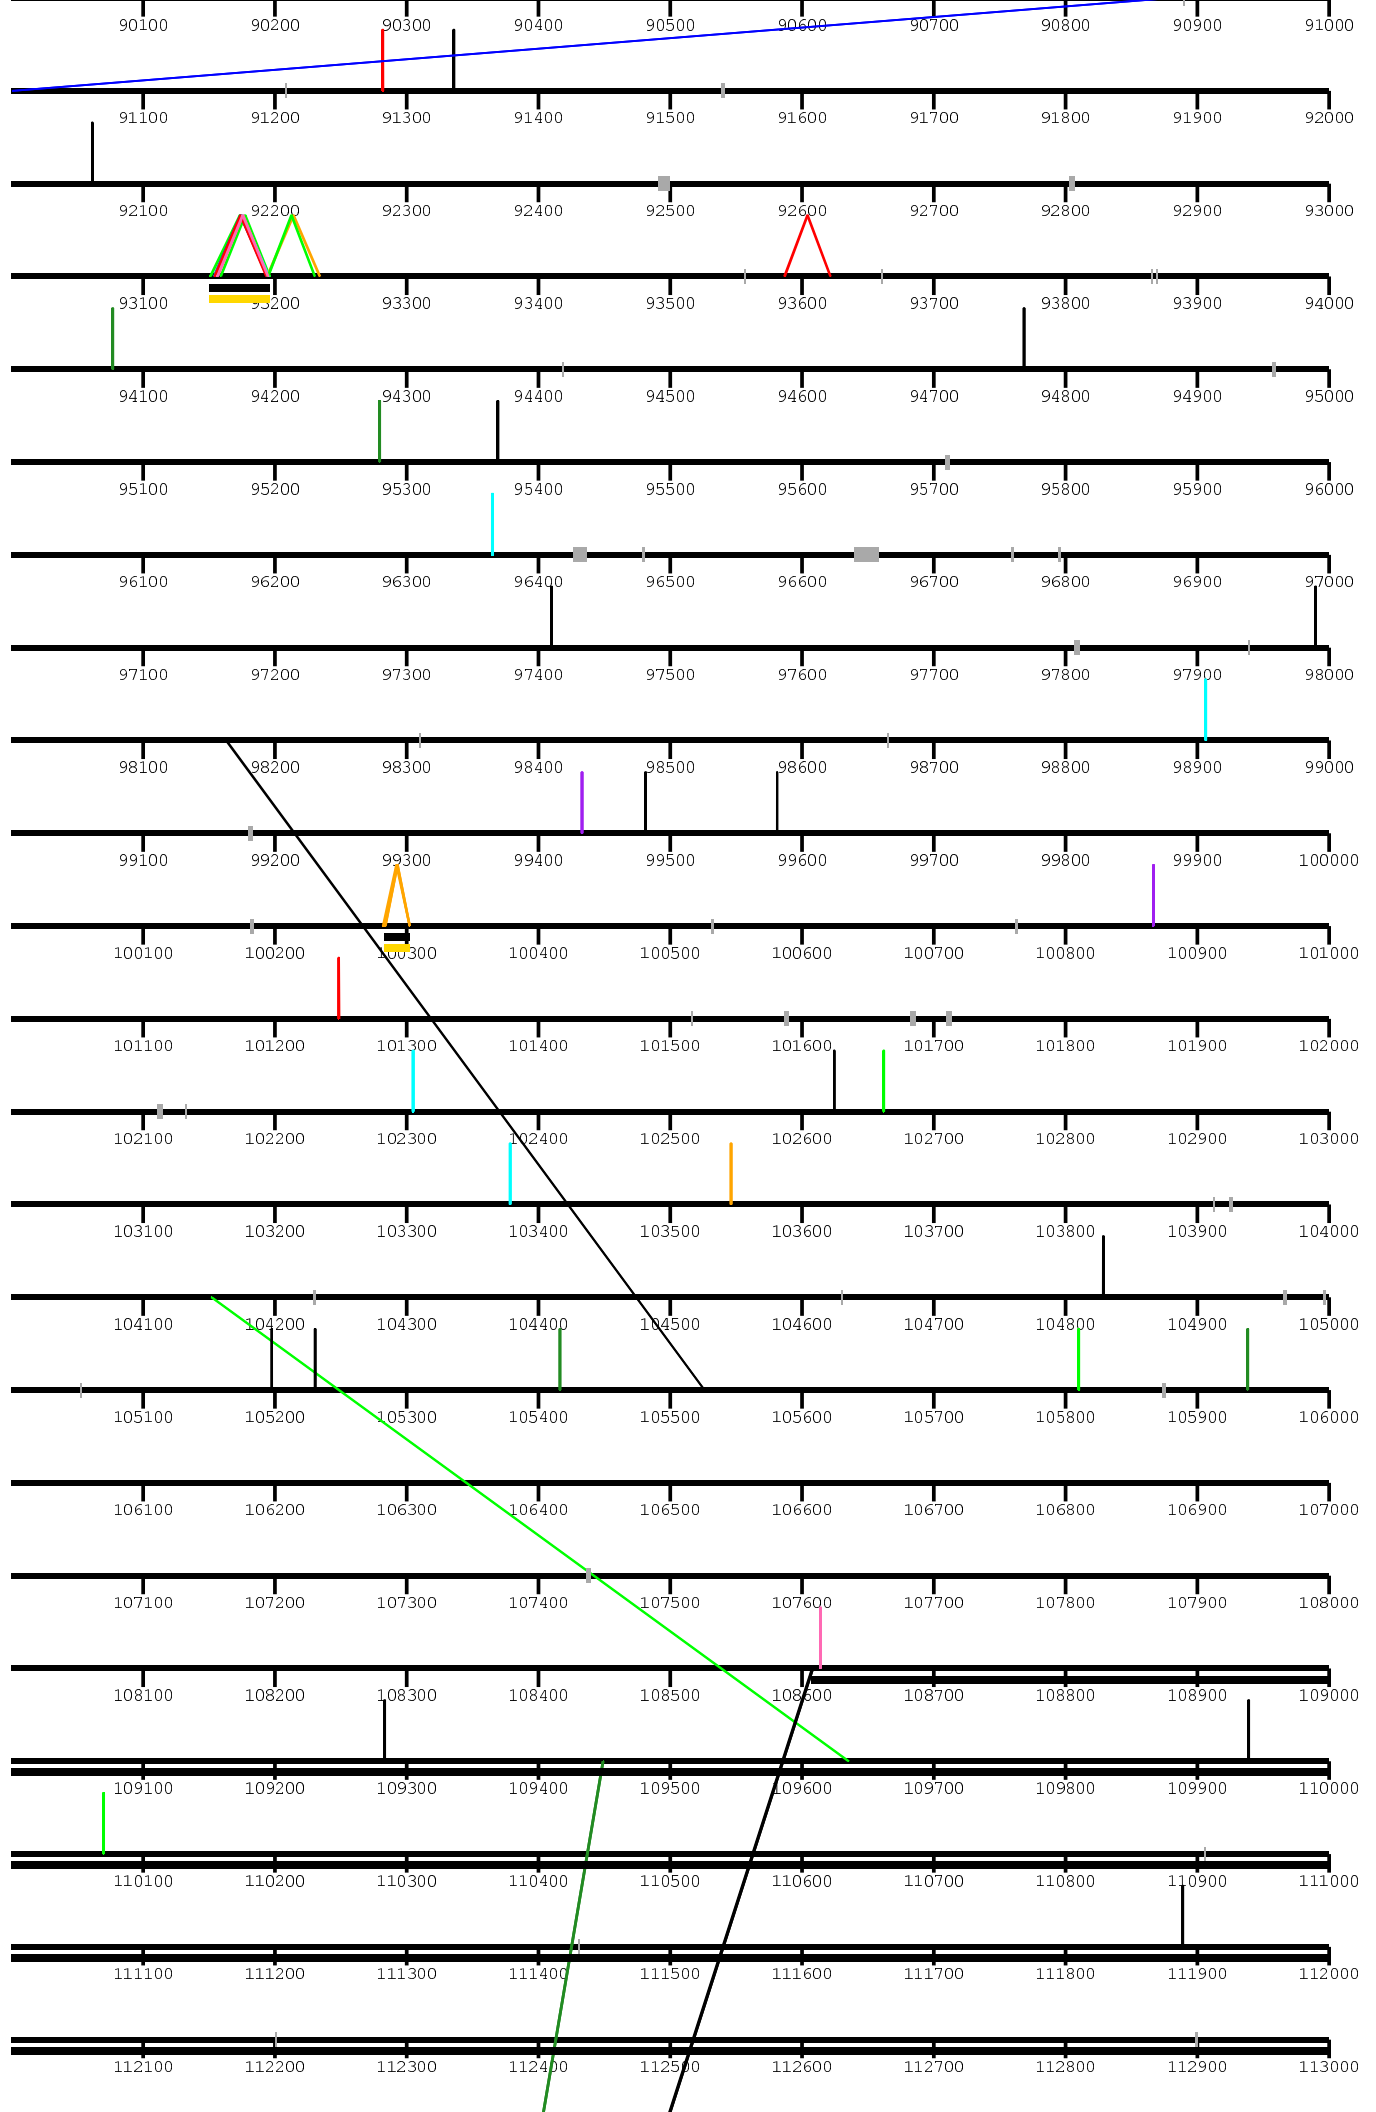

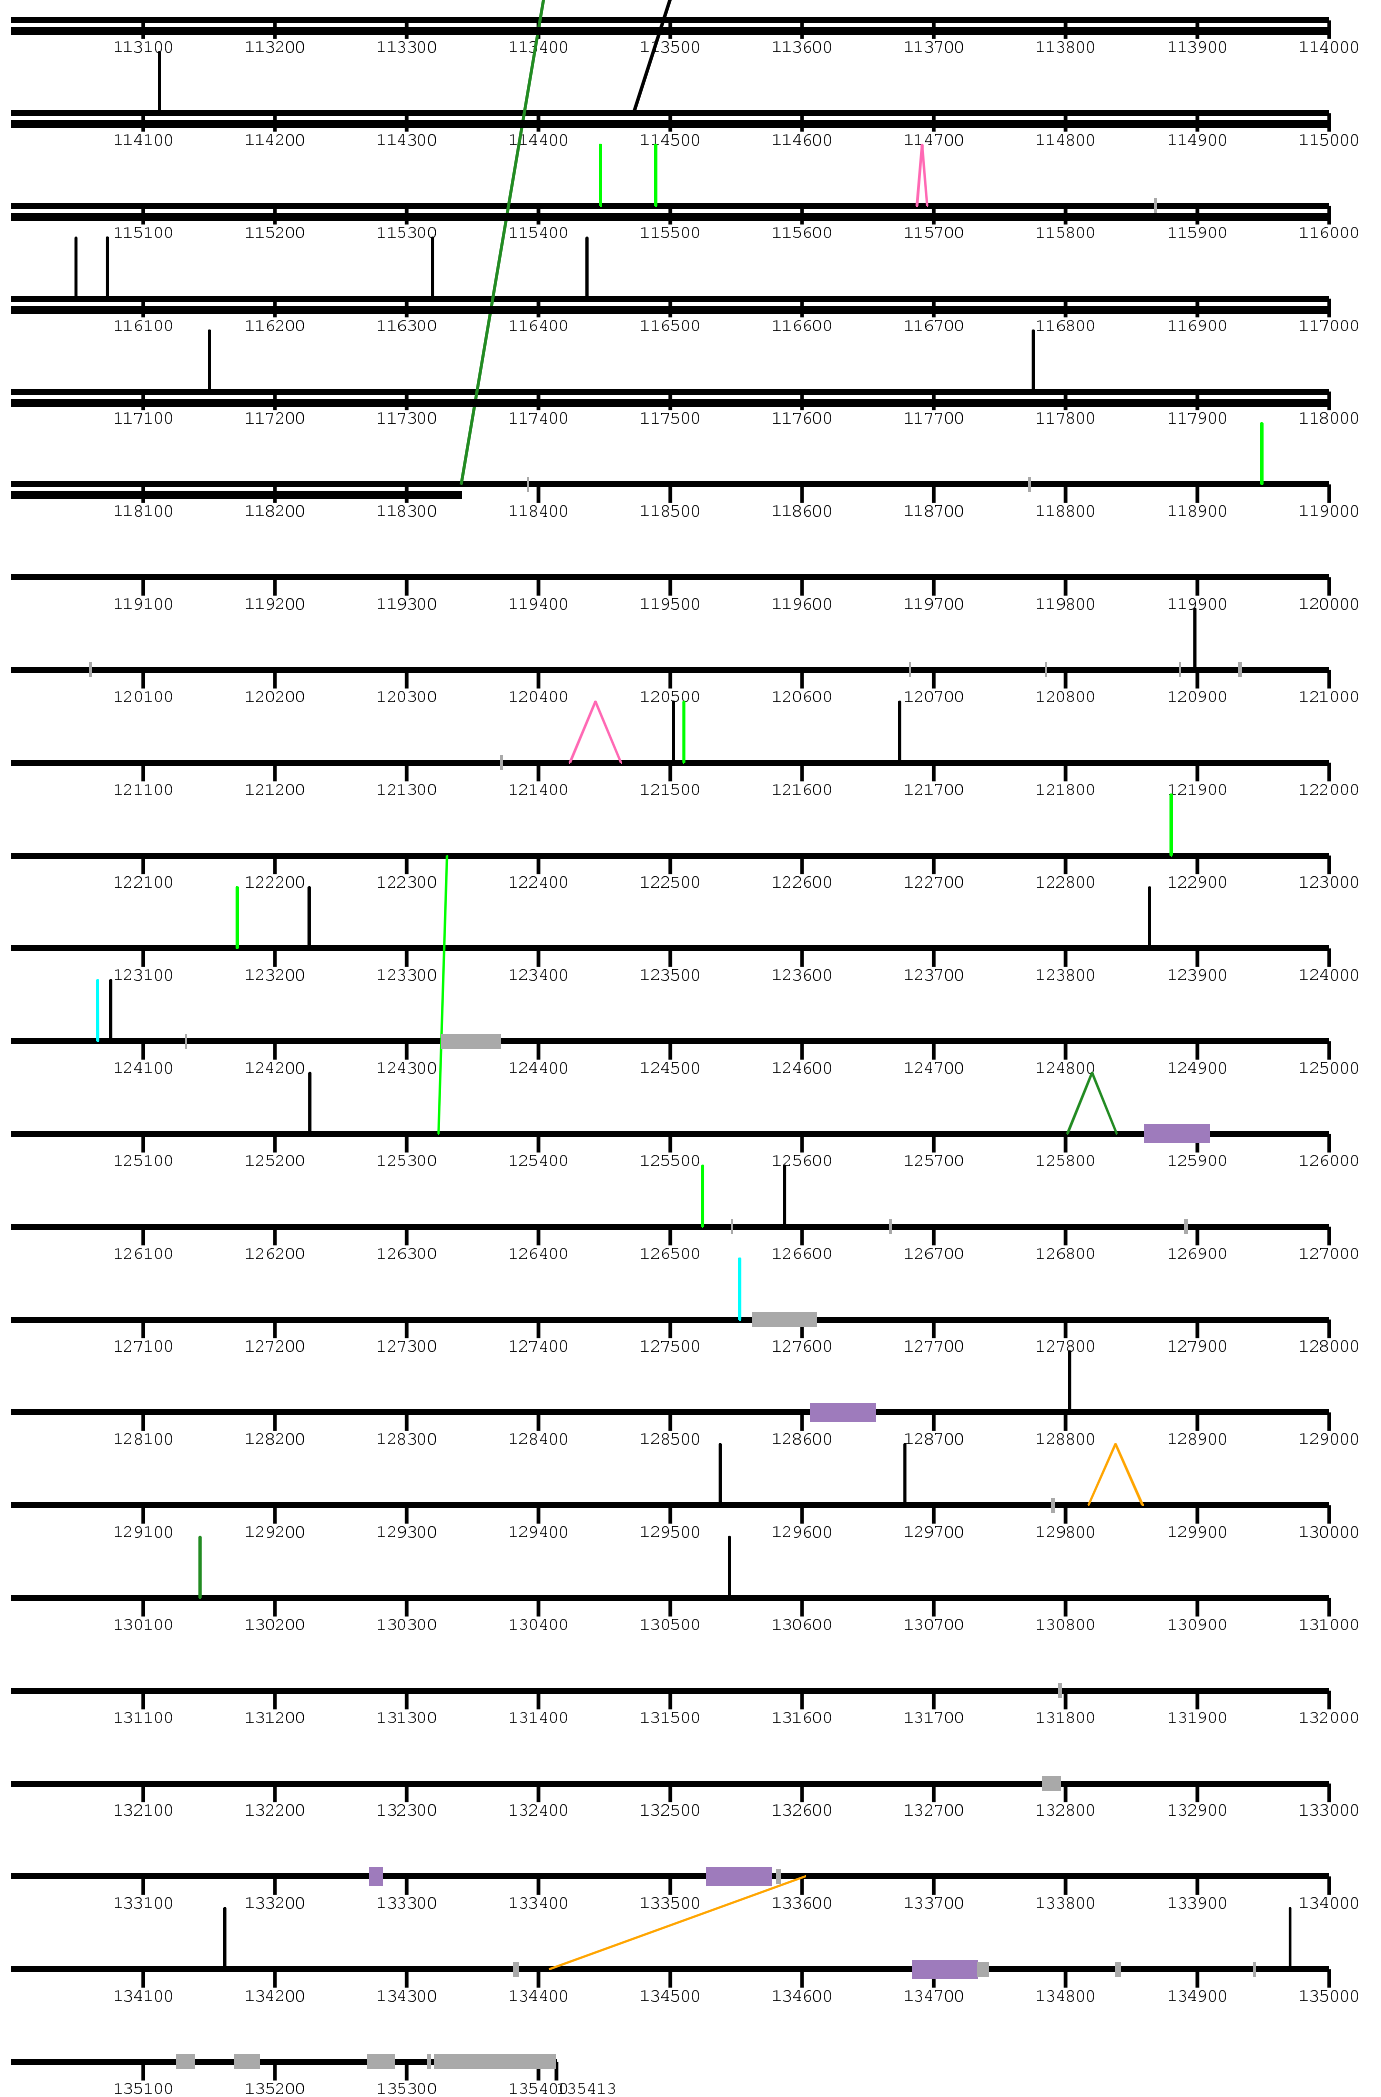

chr11

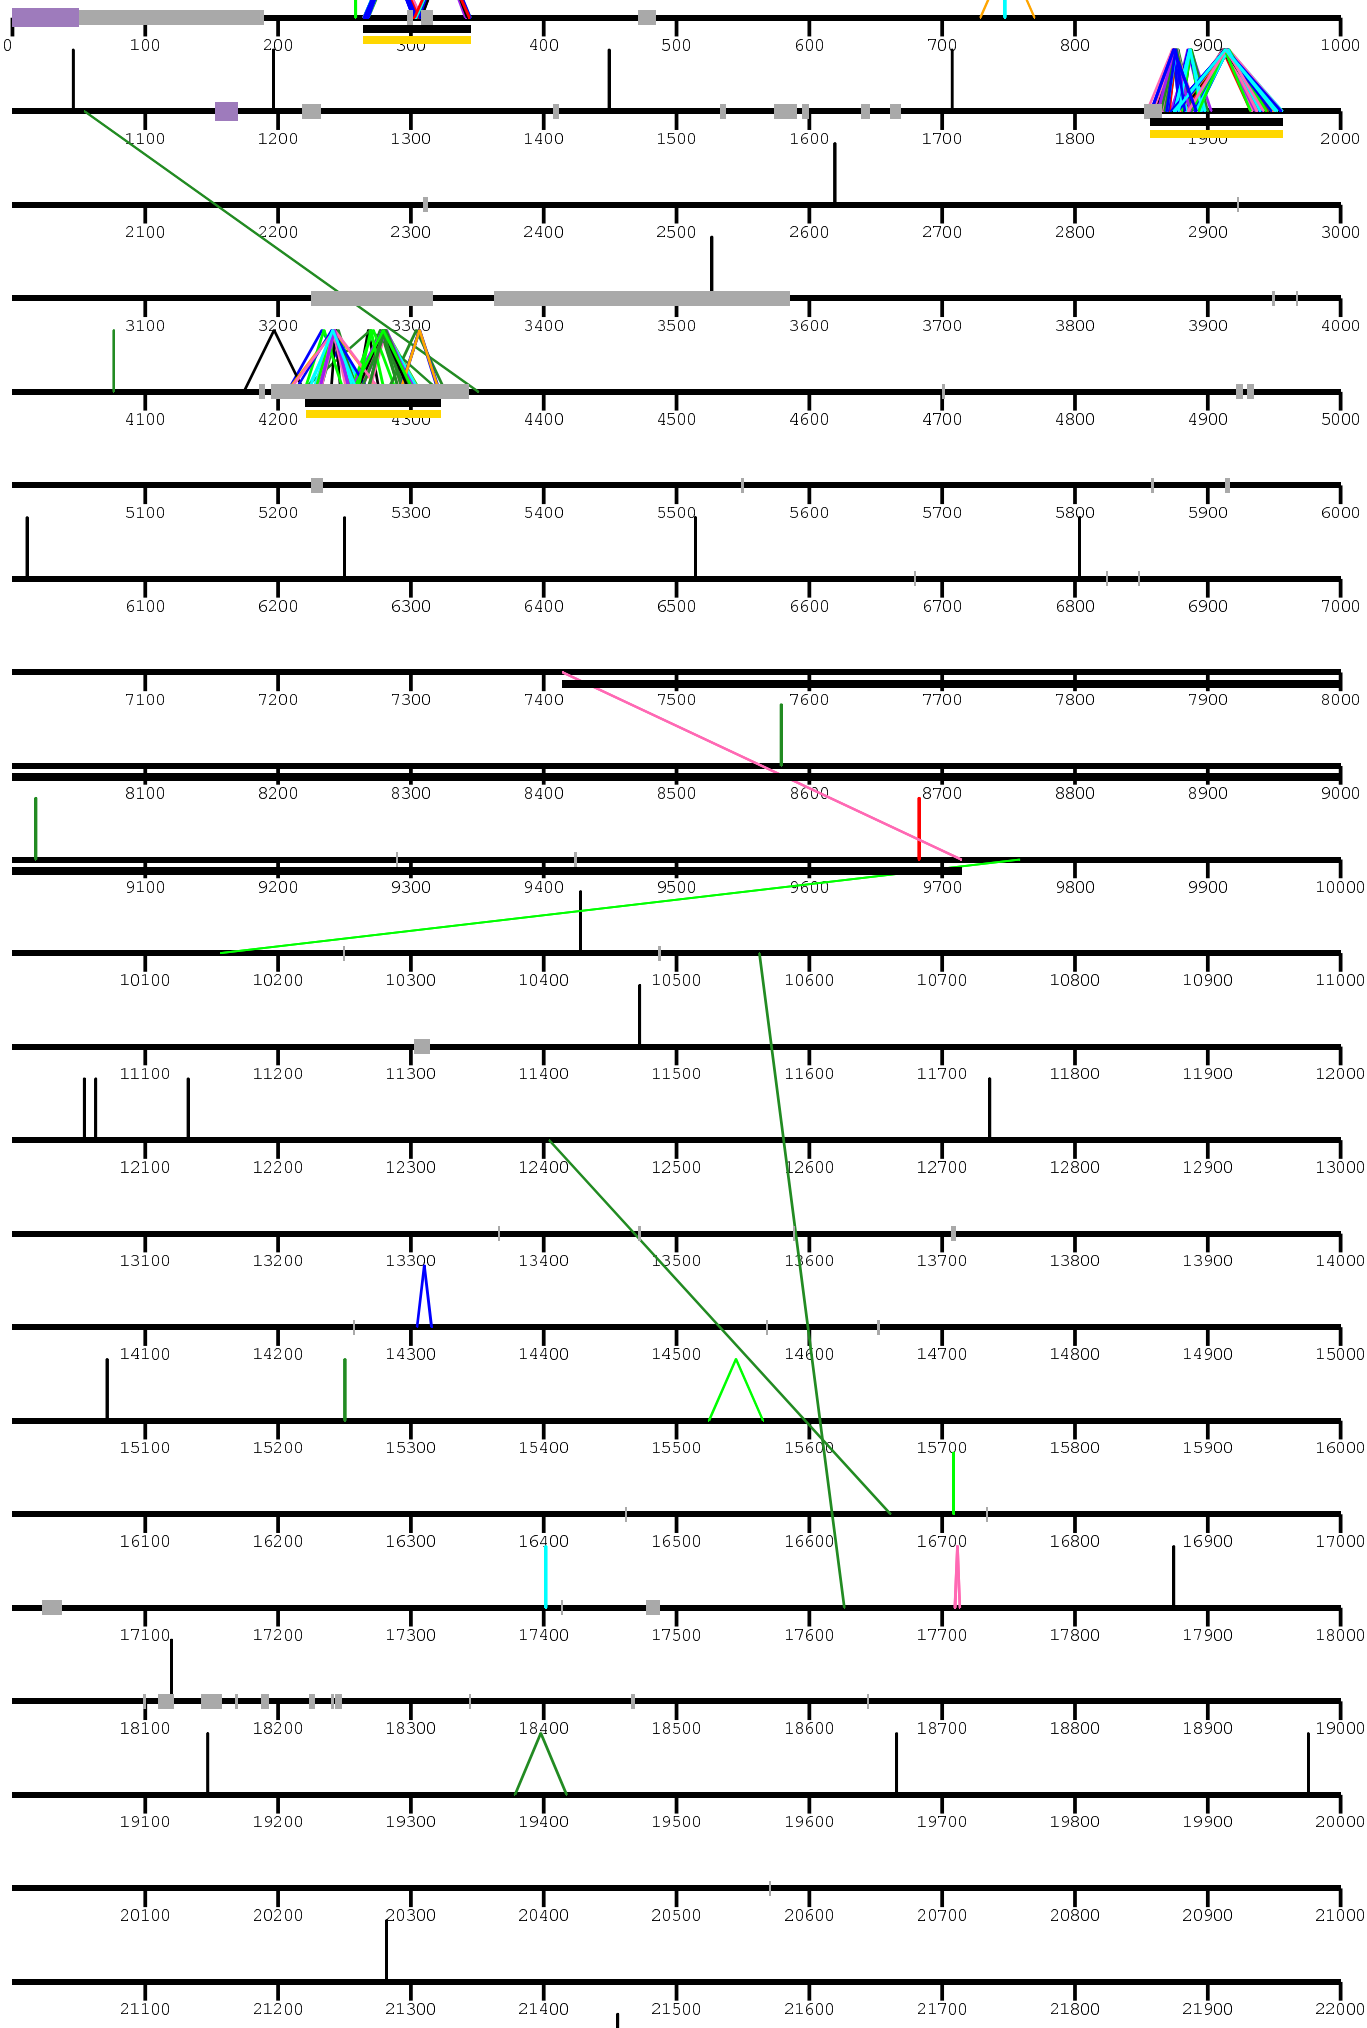

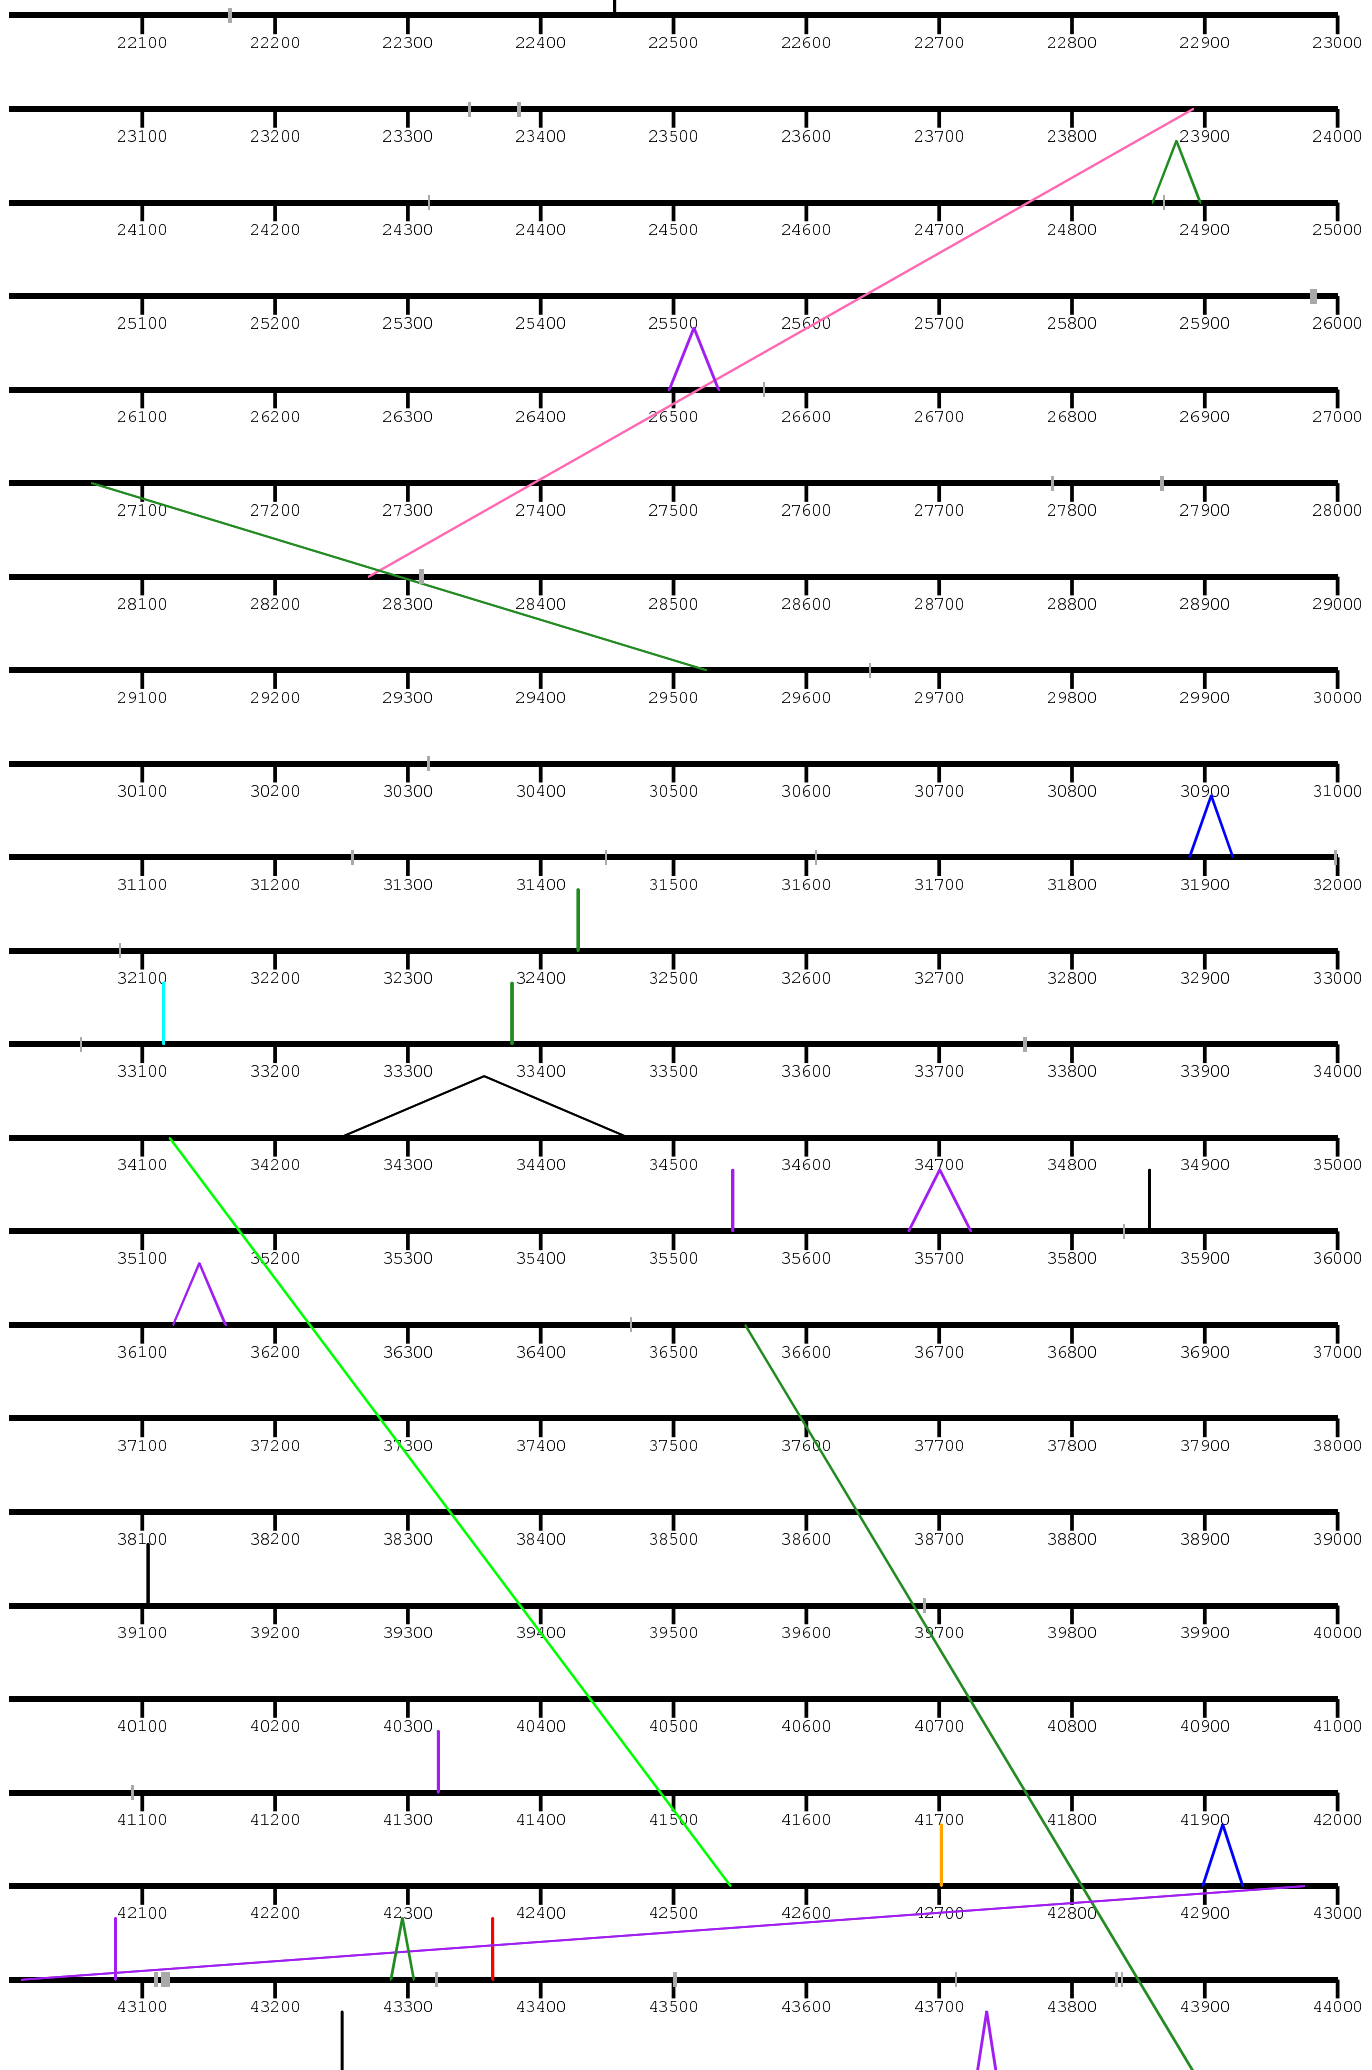

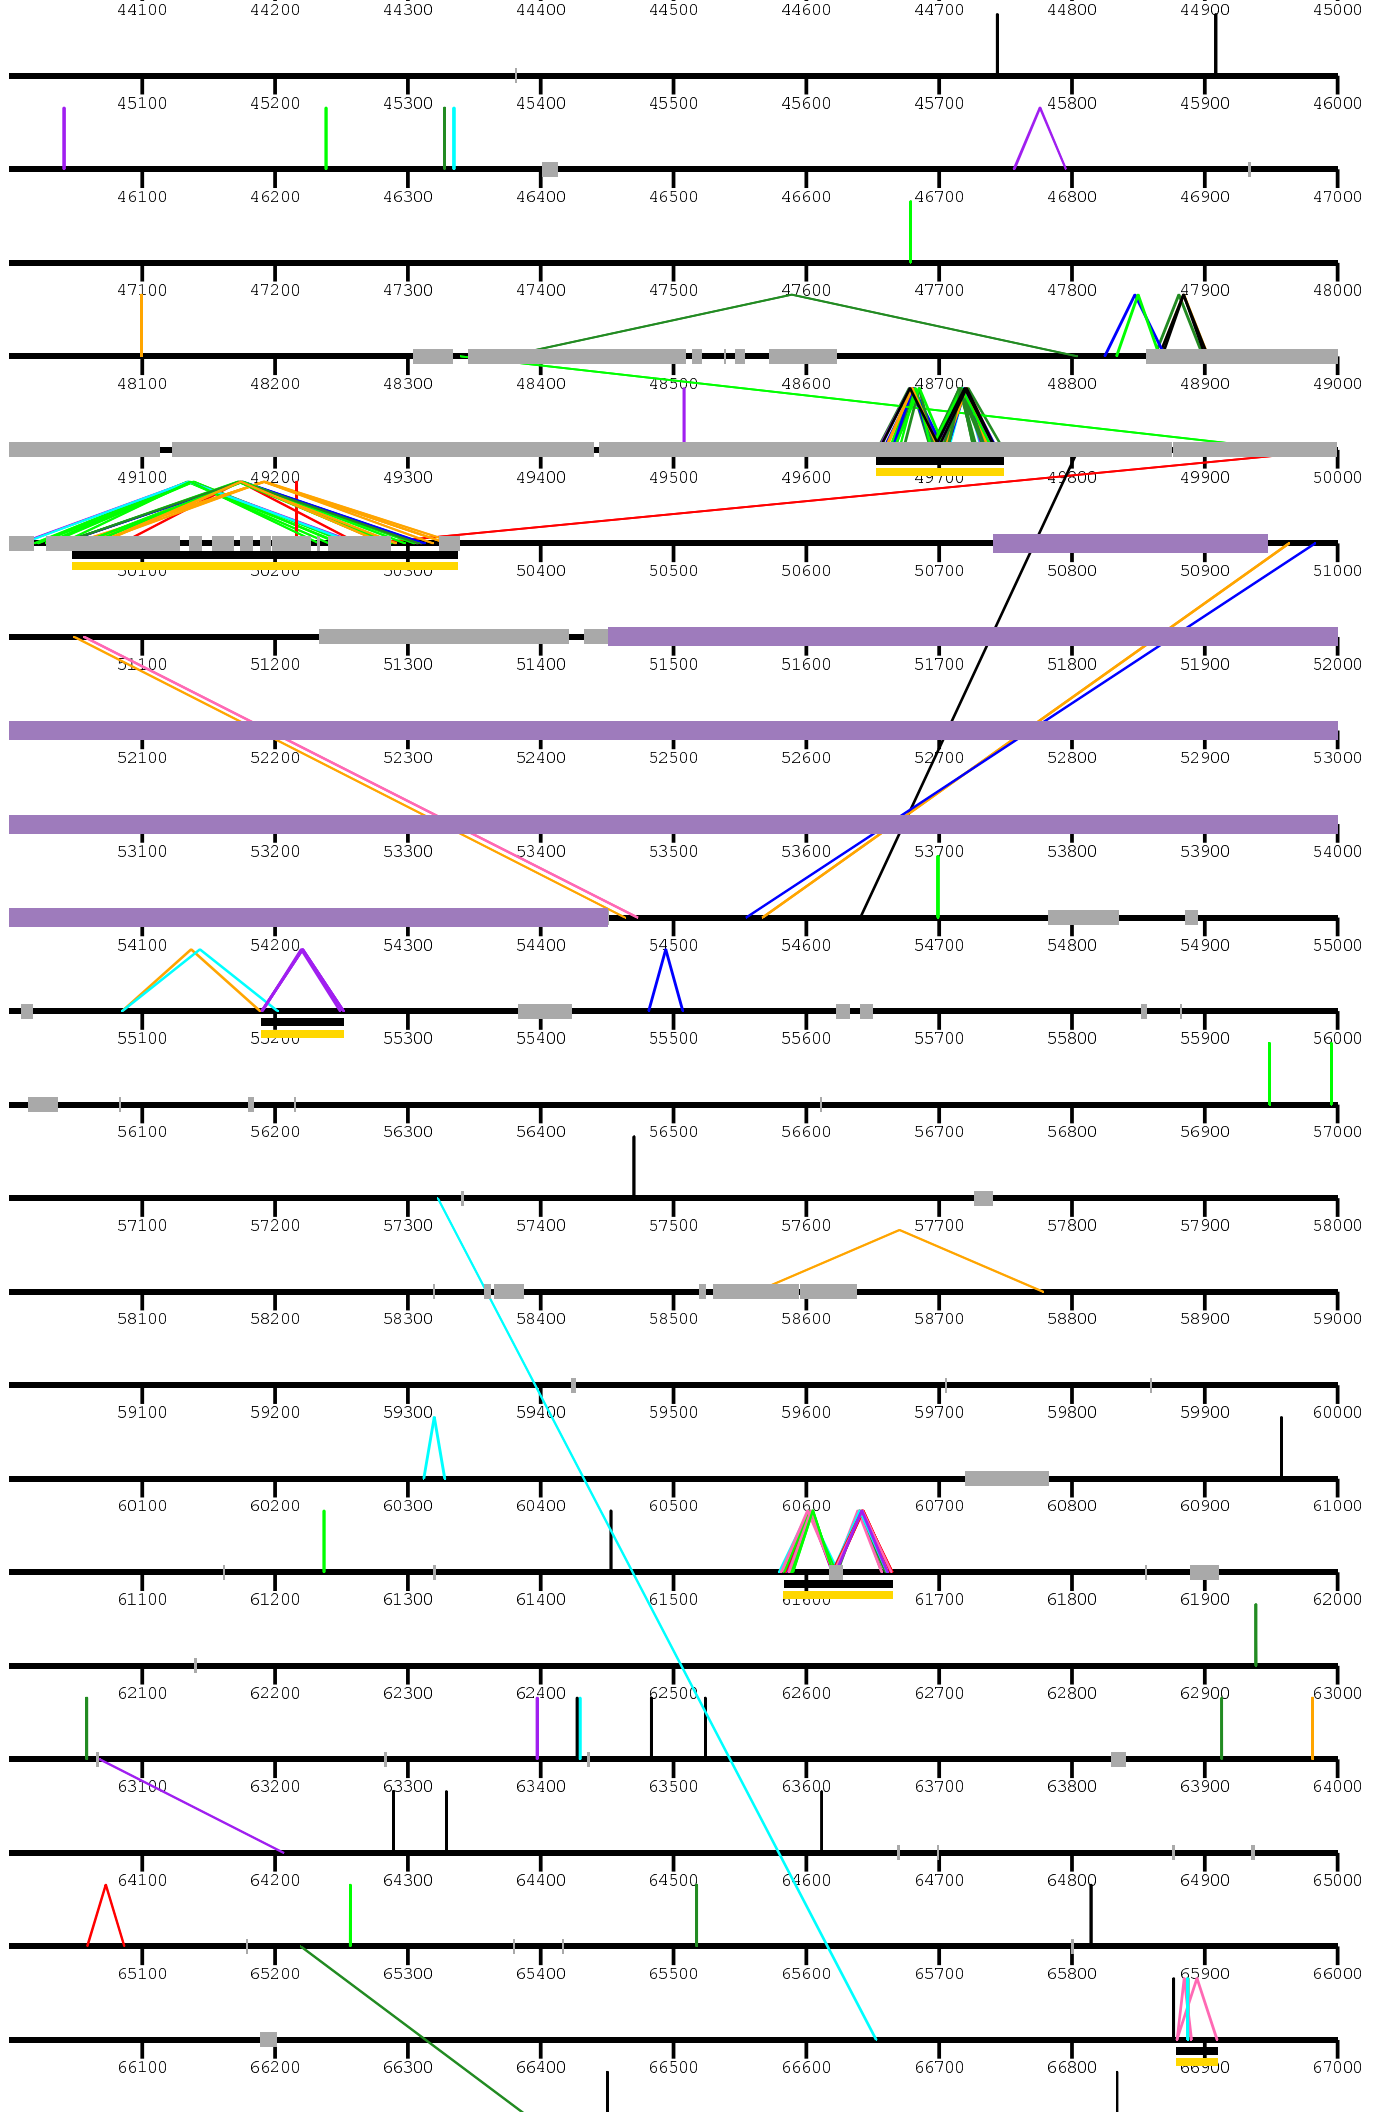

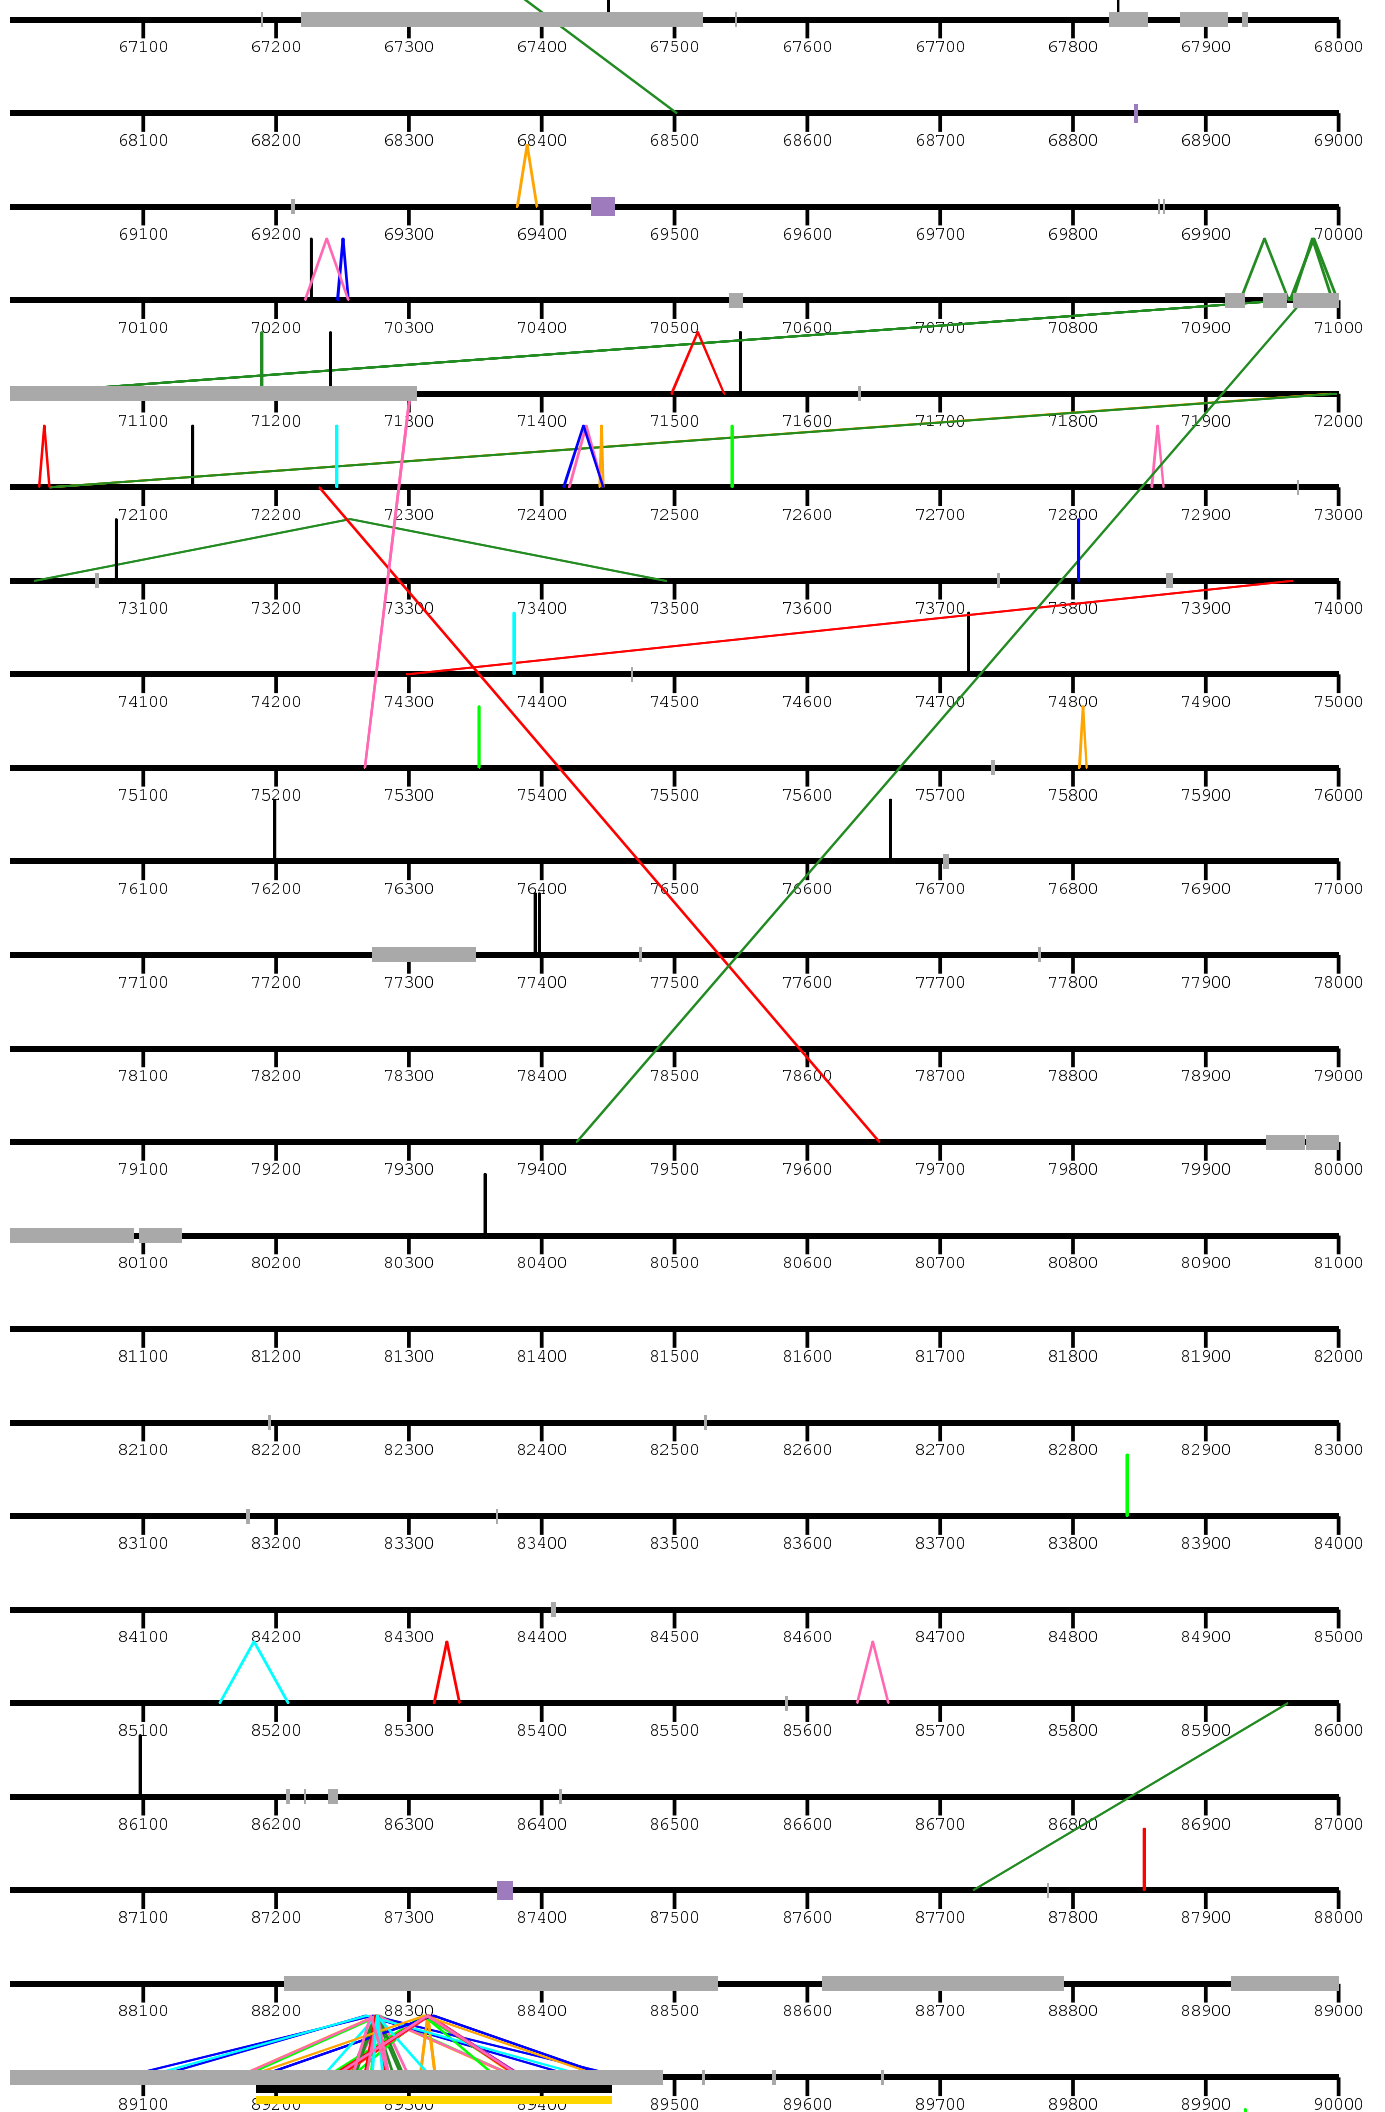



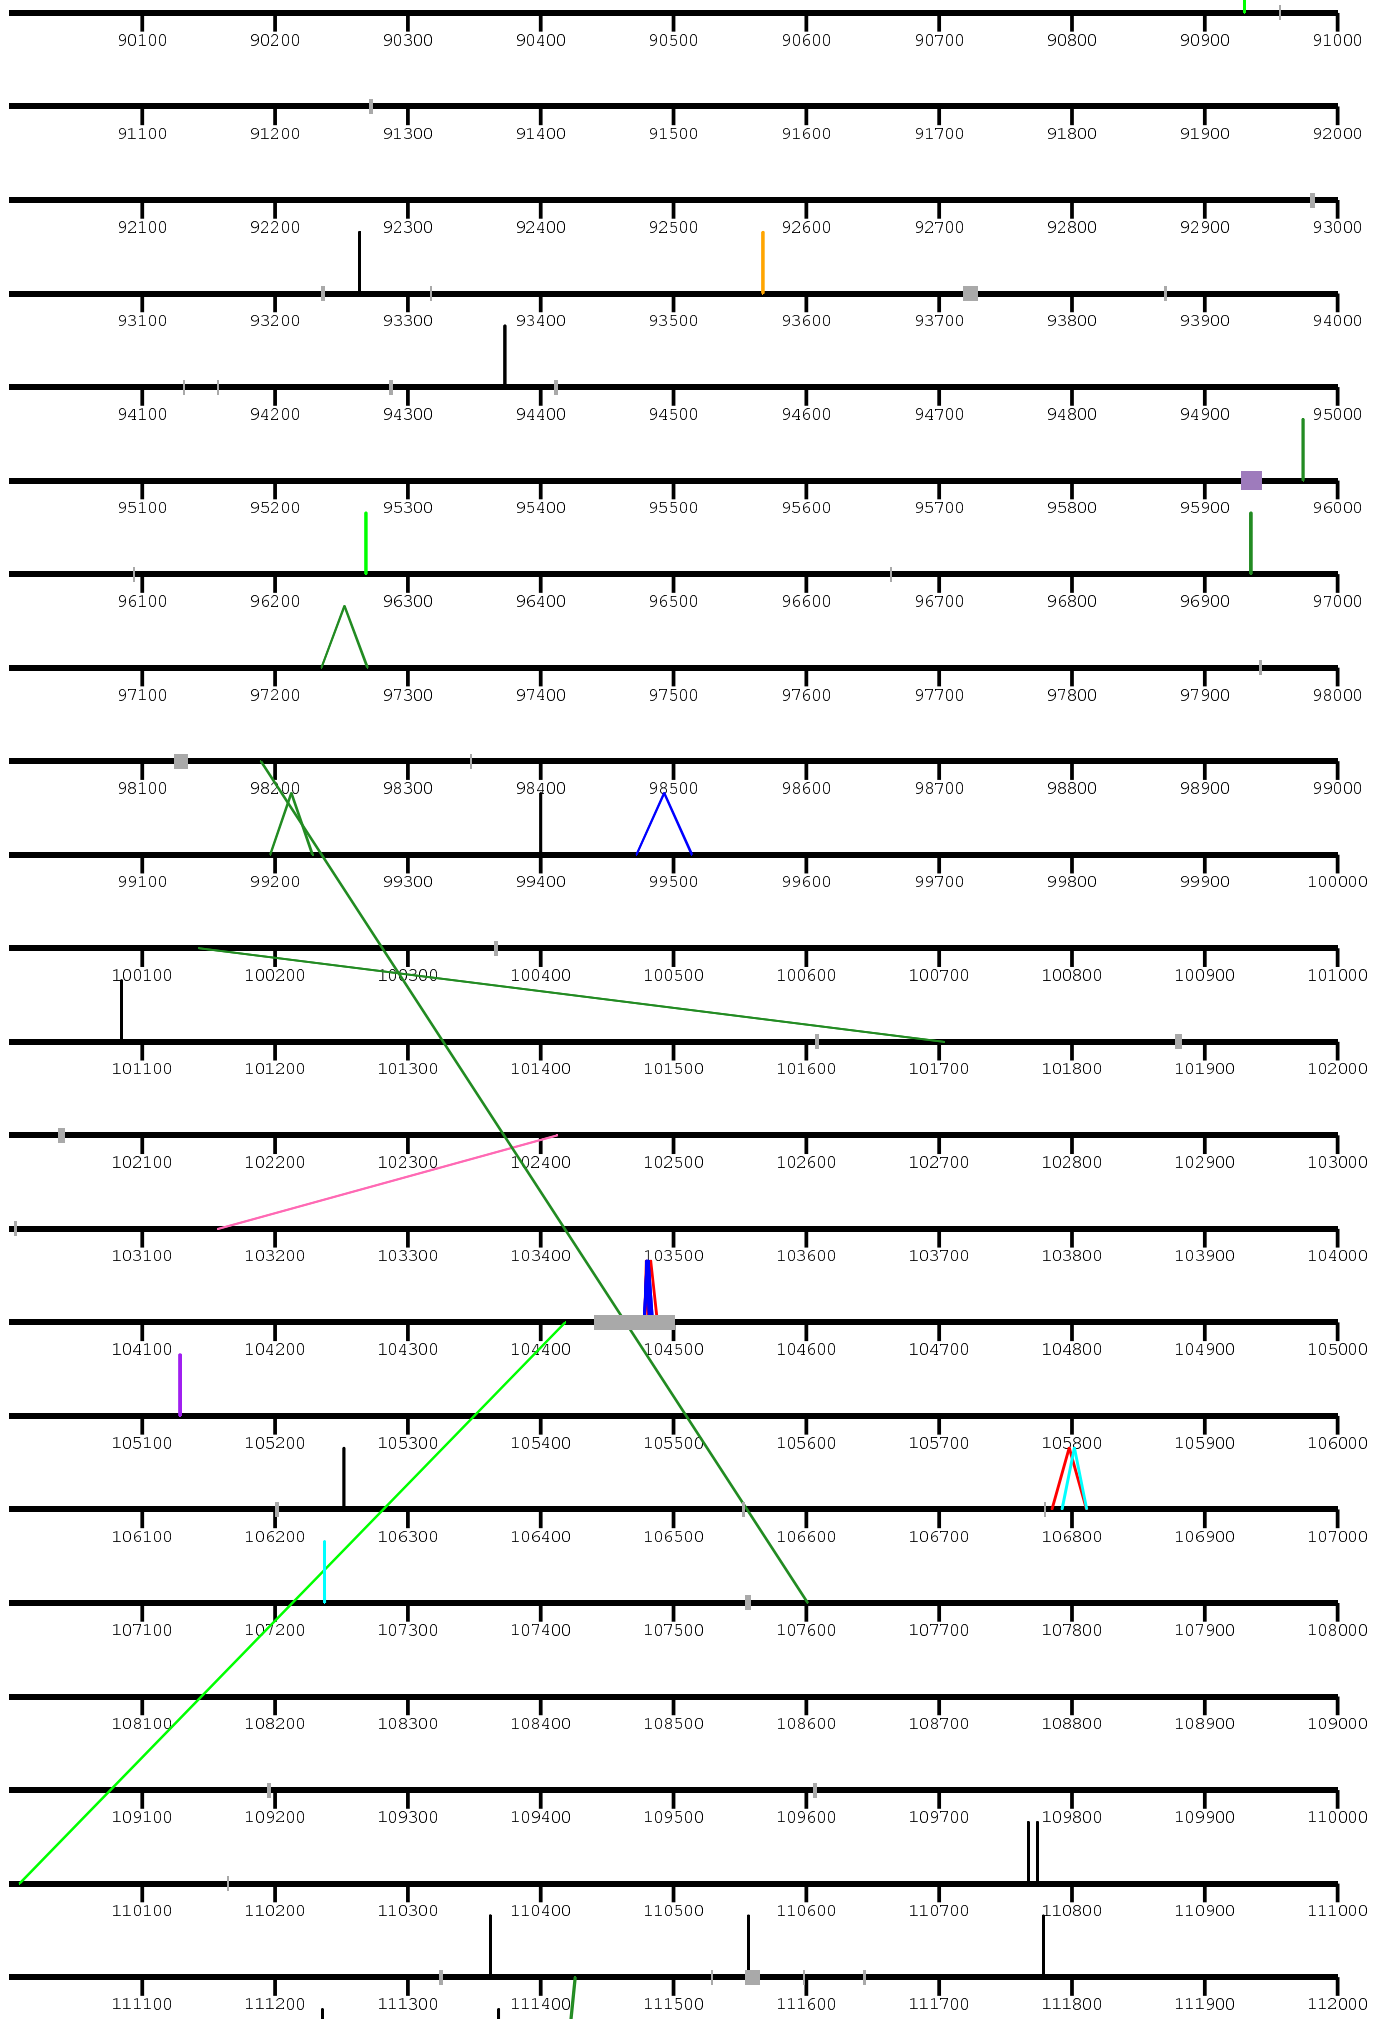

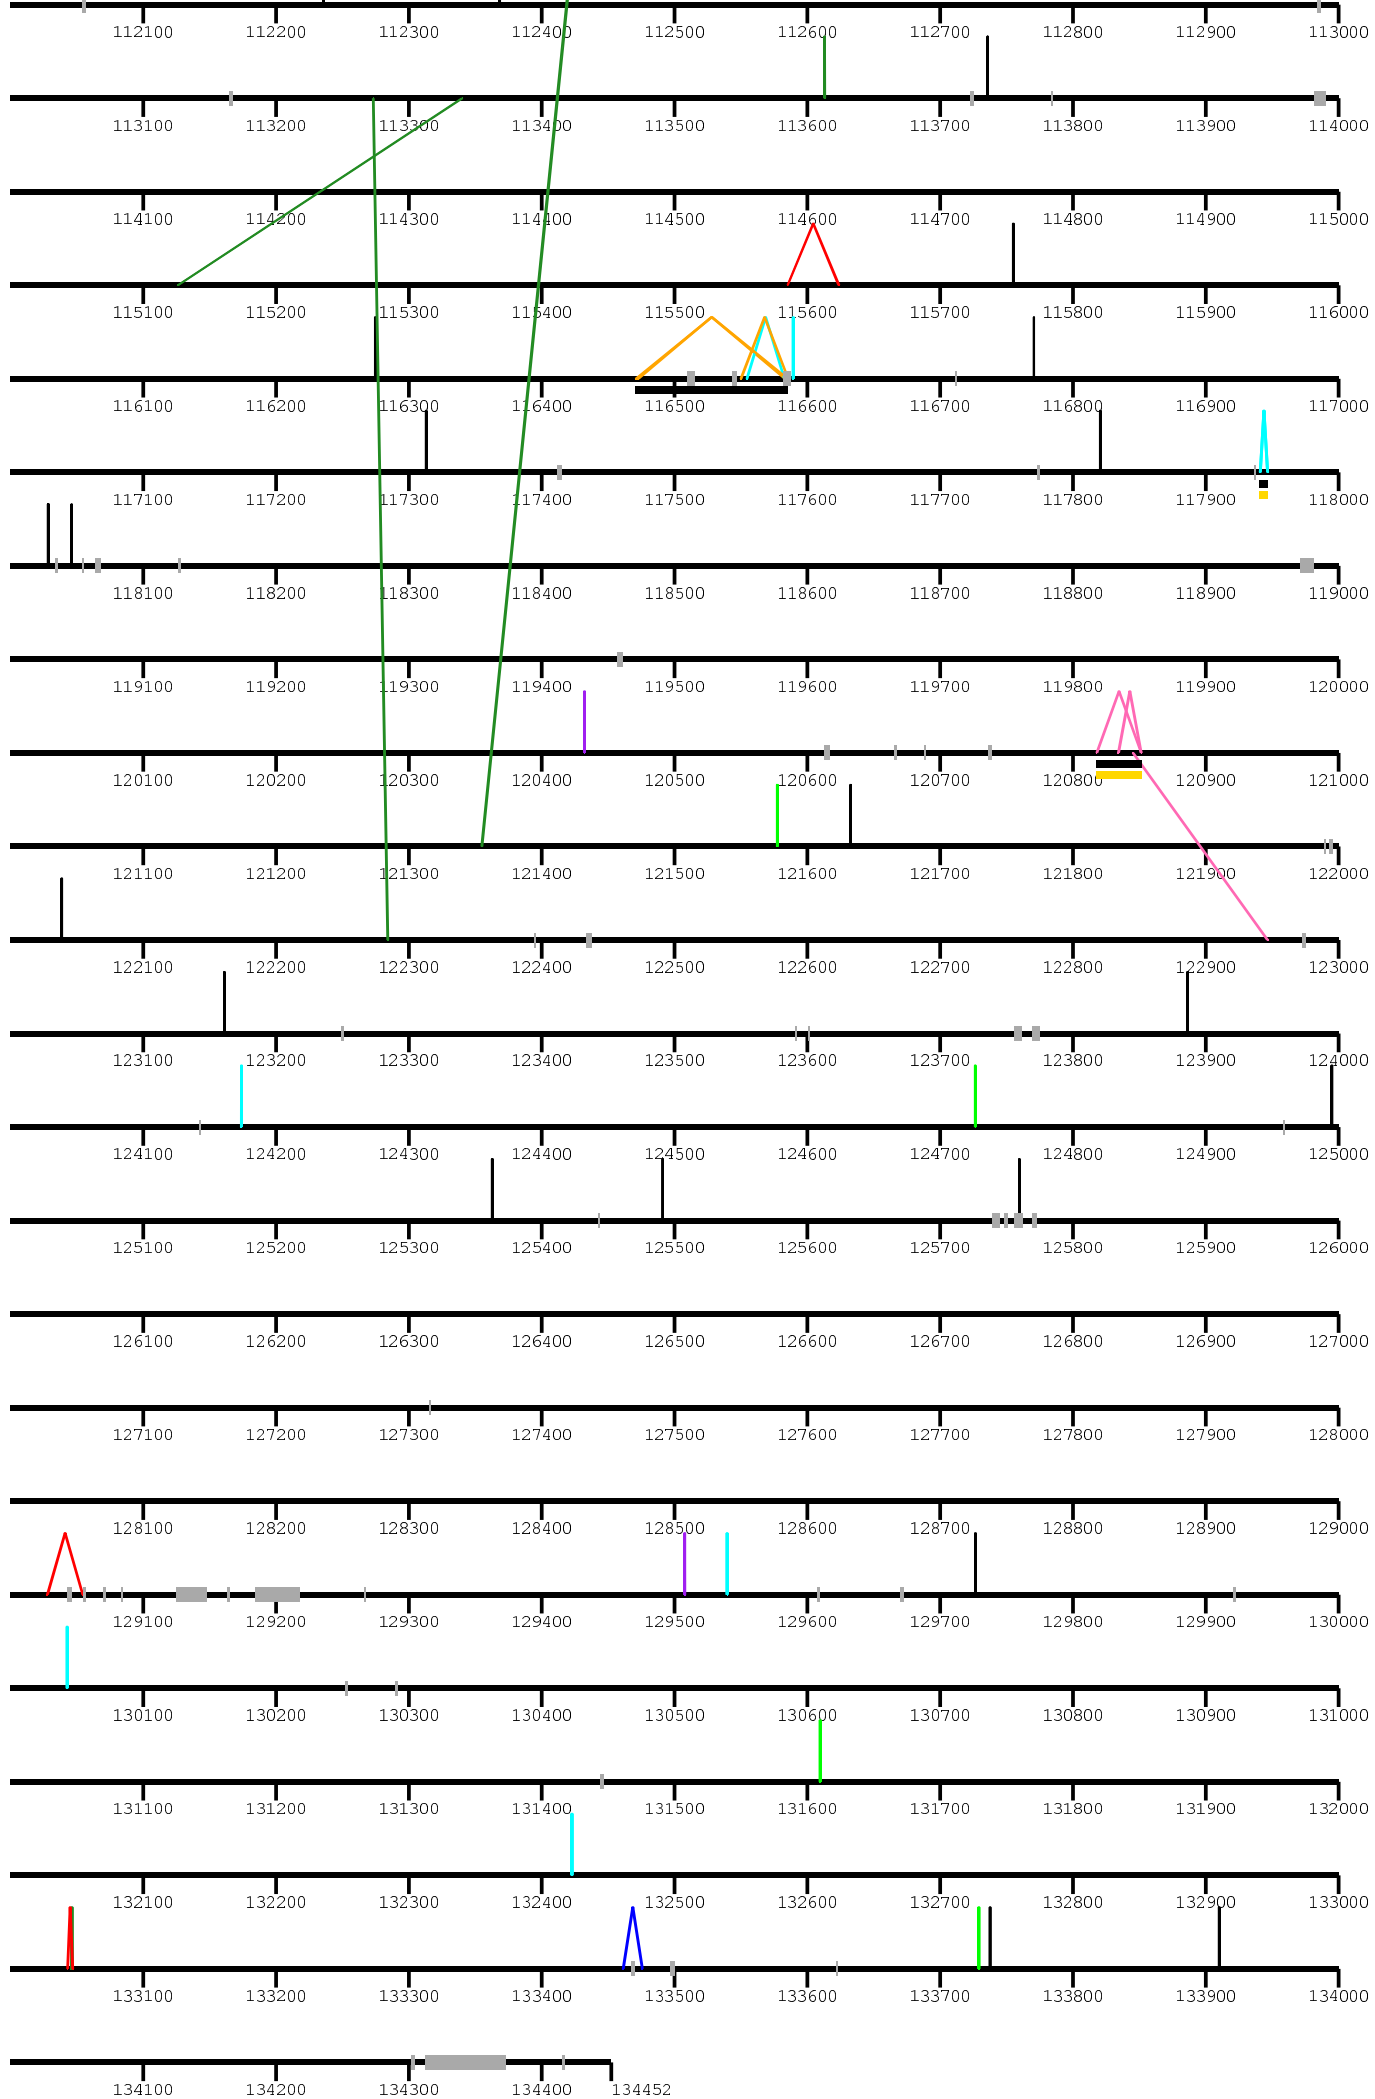

chr12

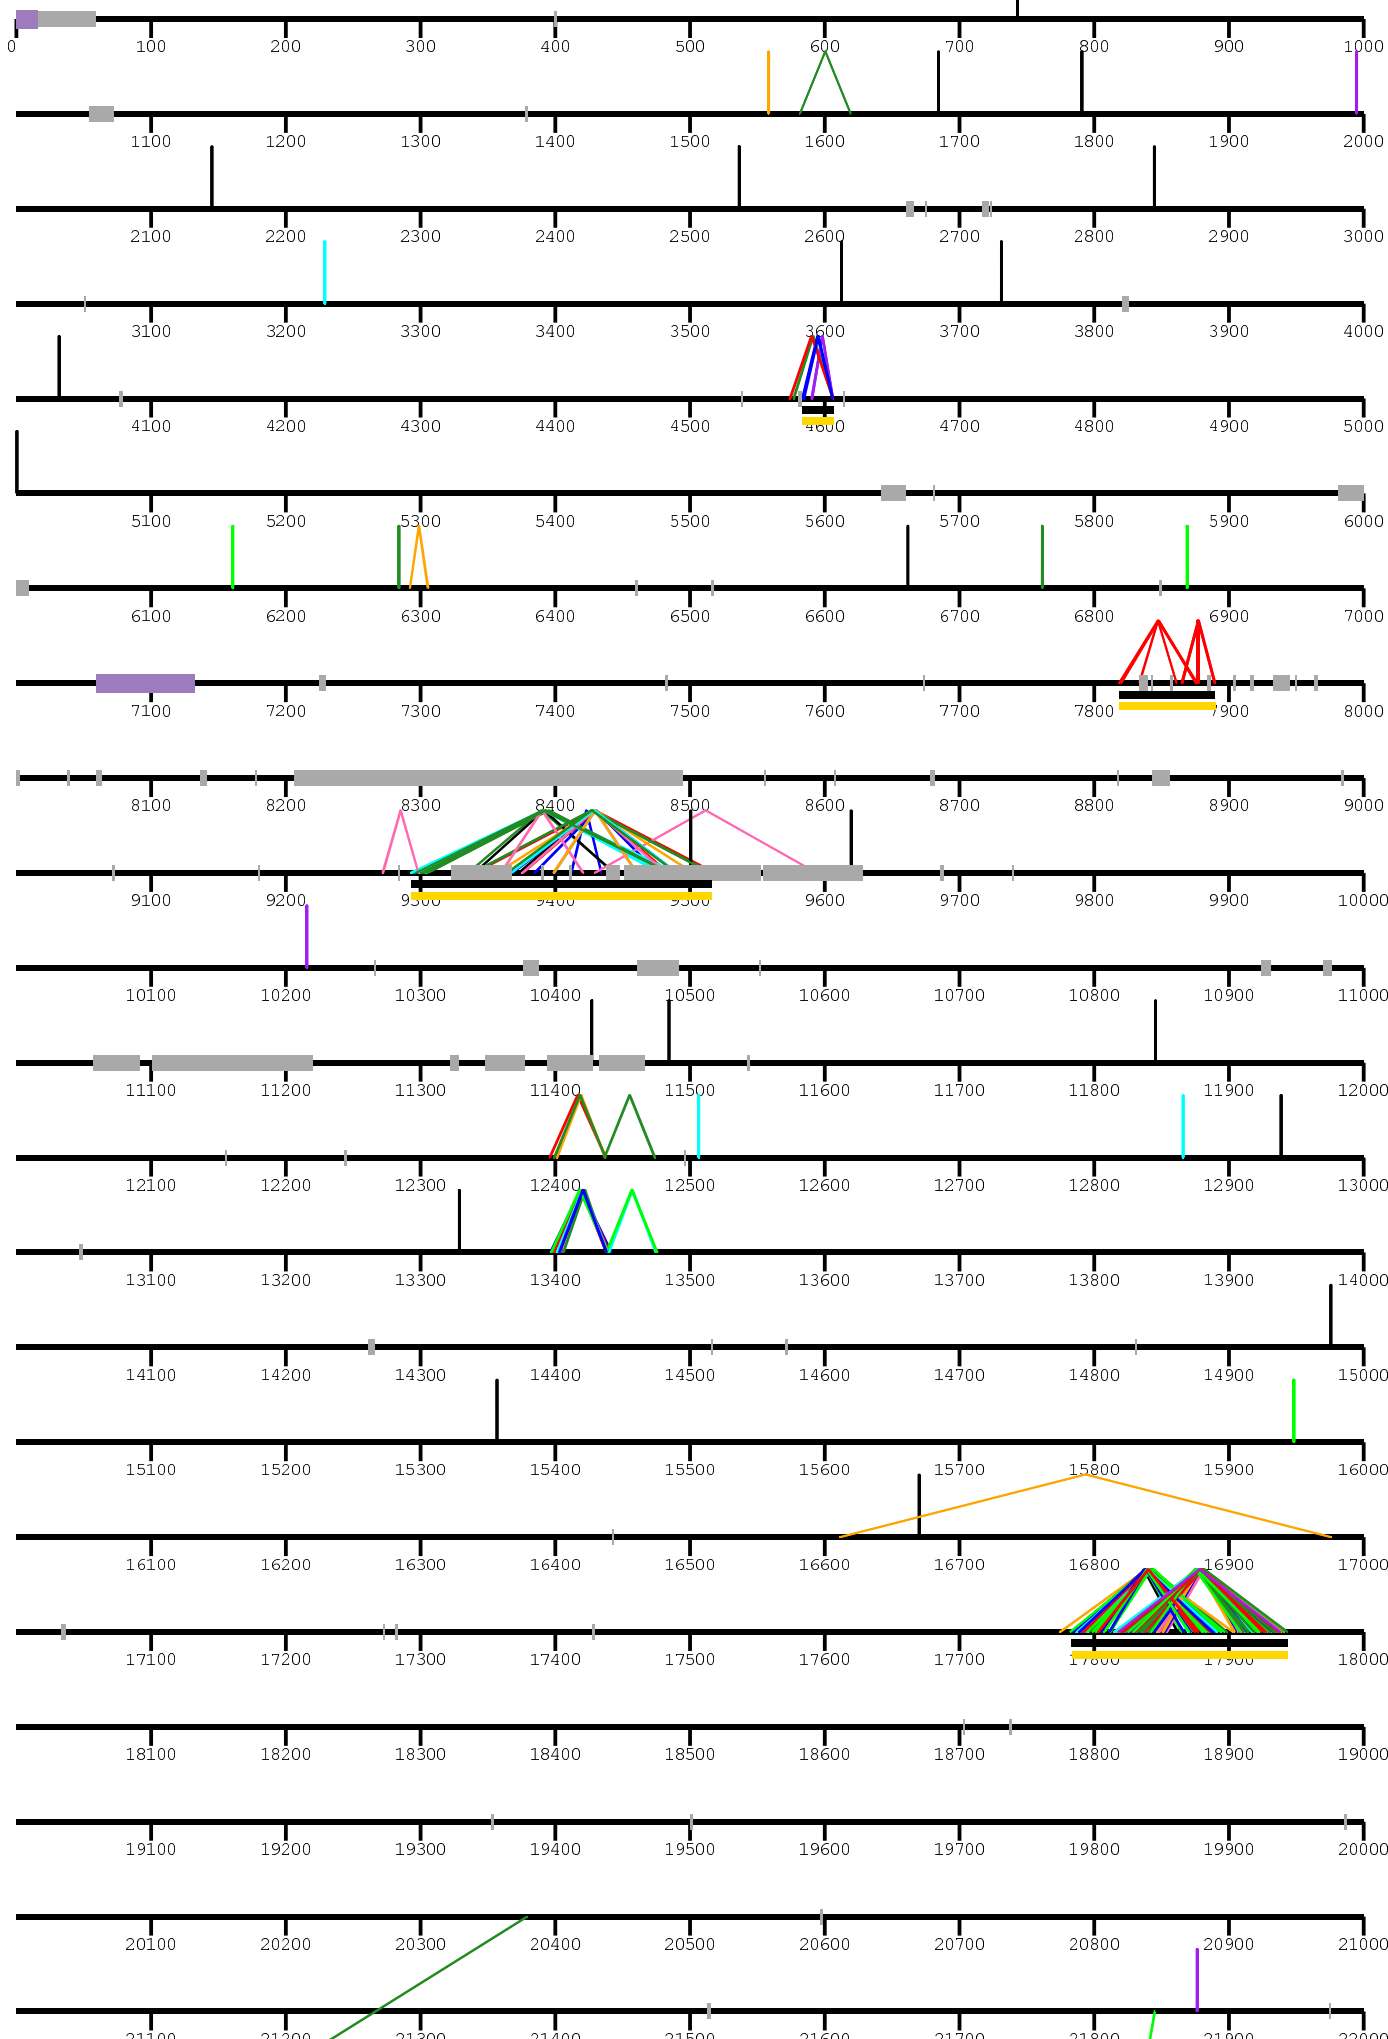

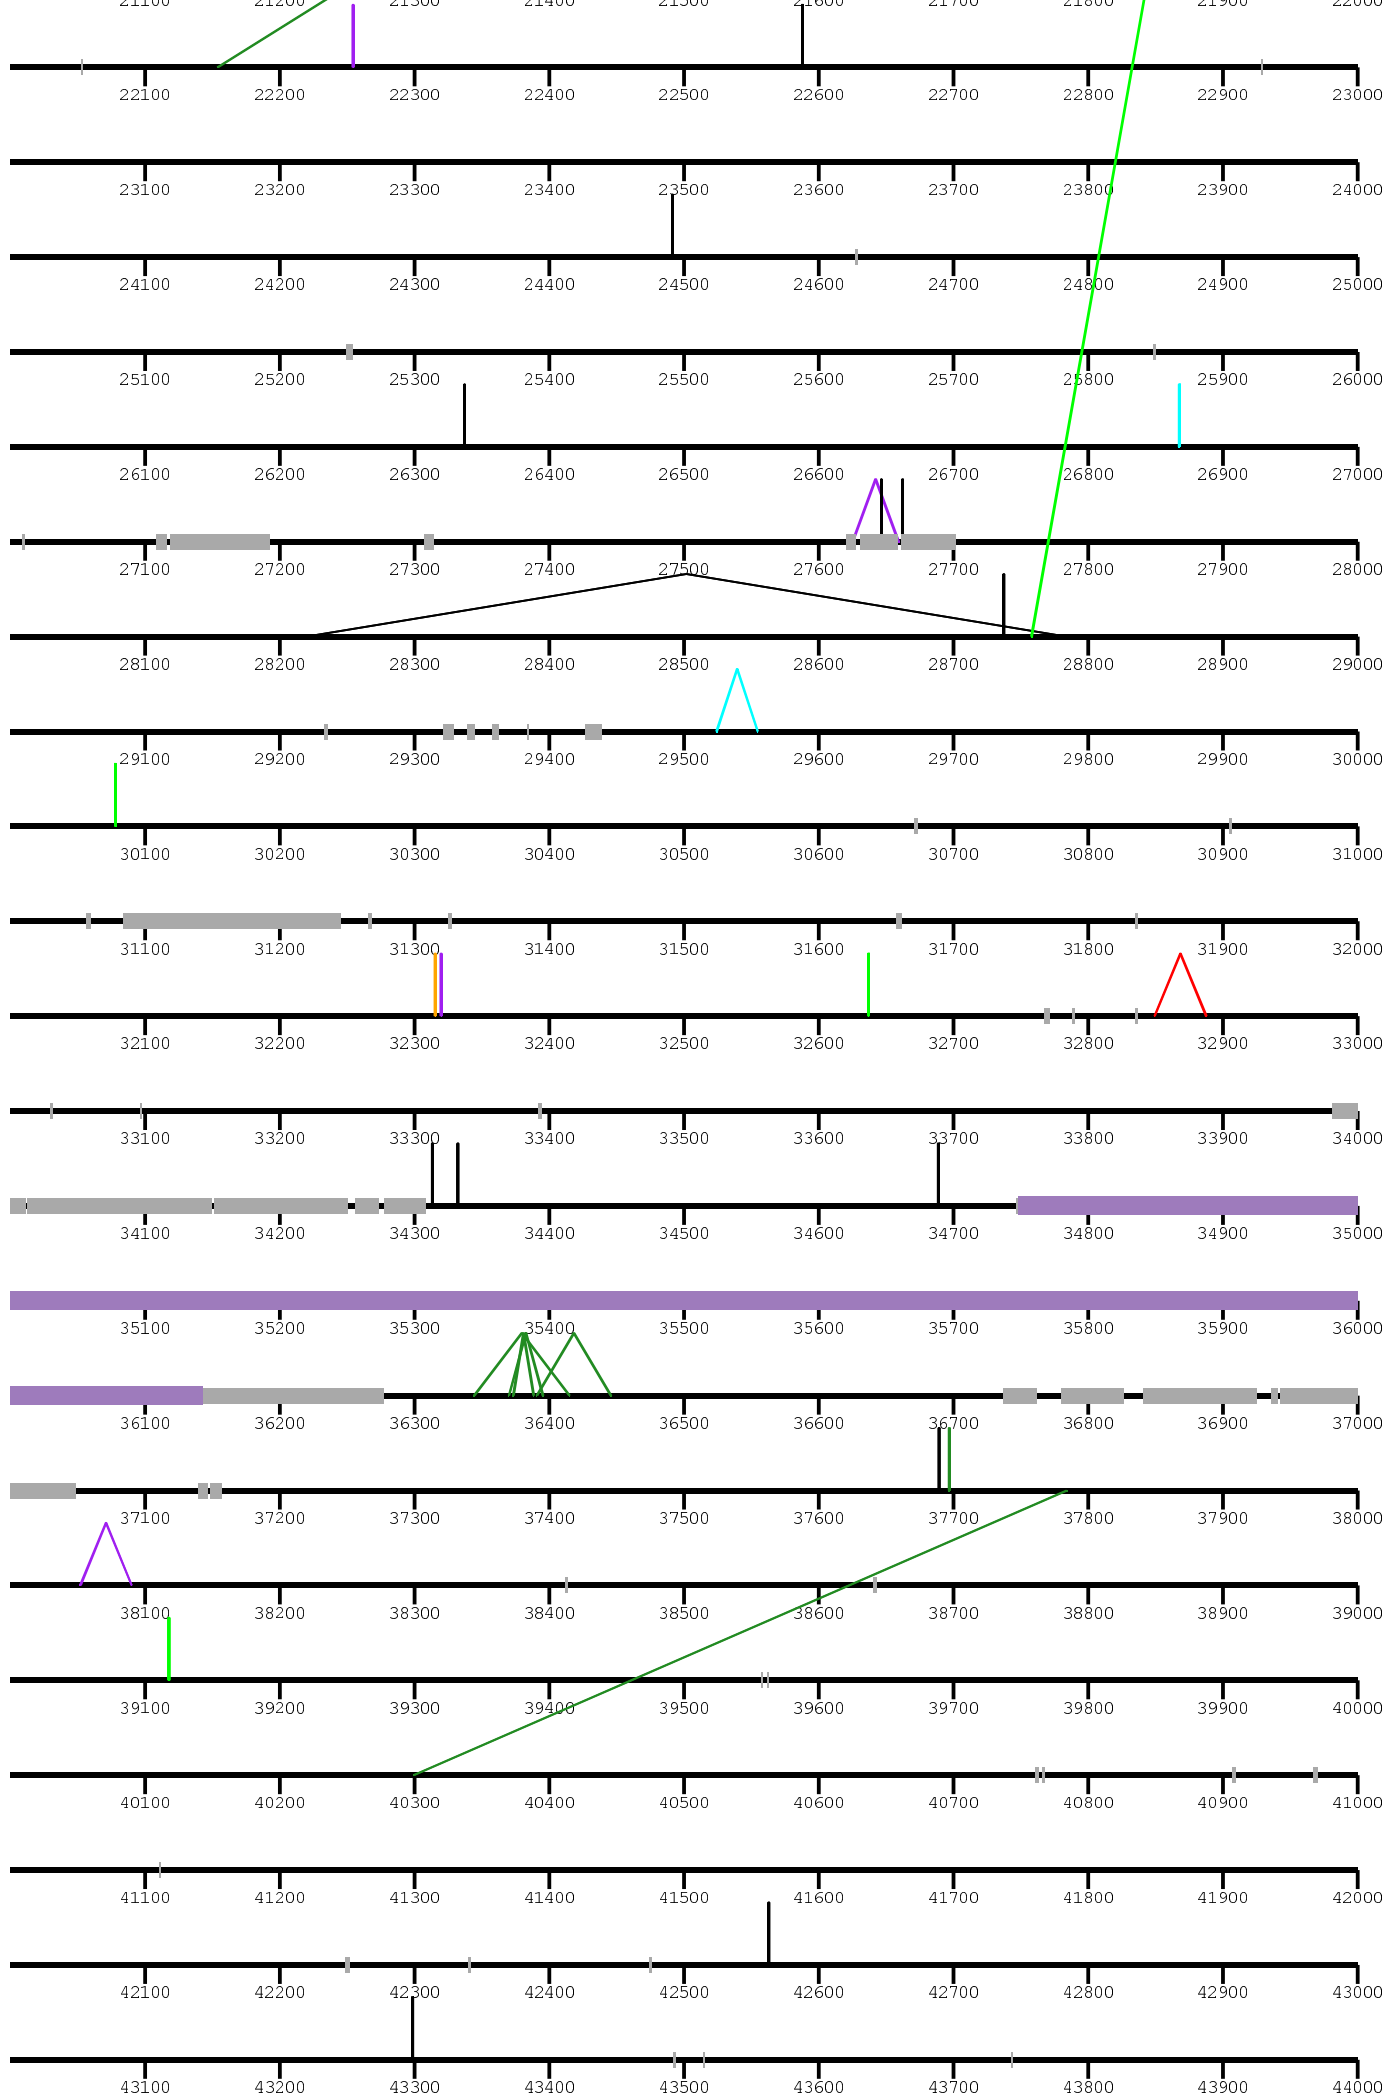

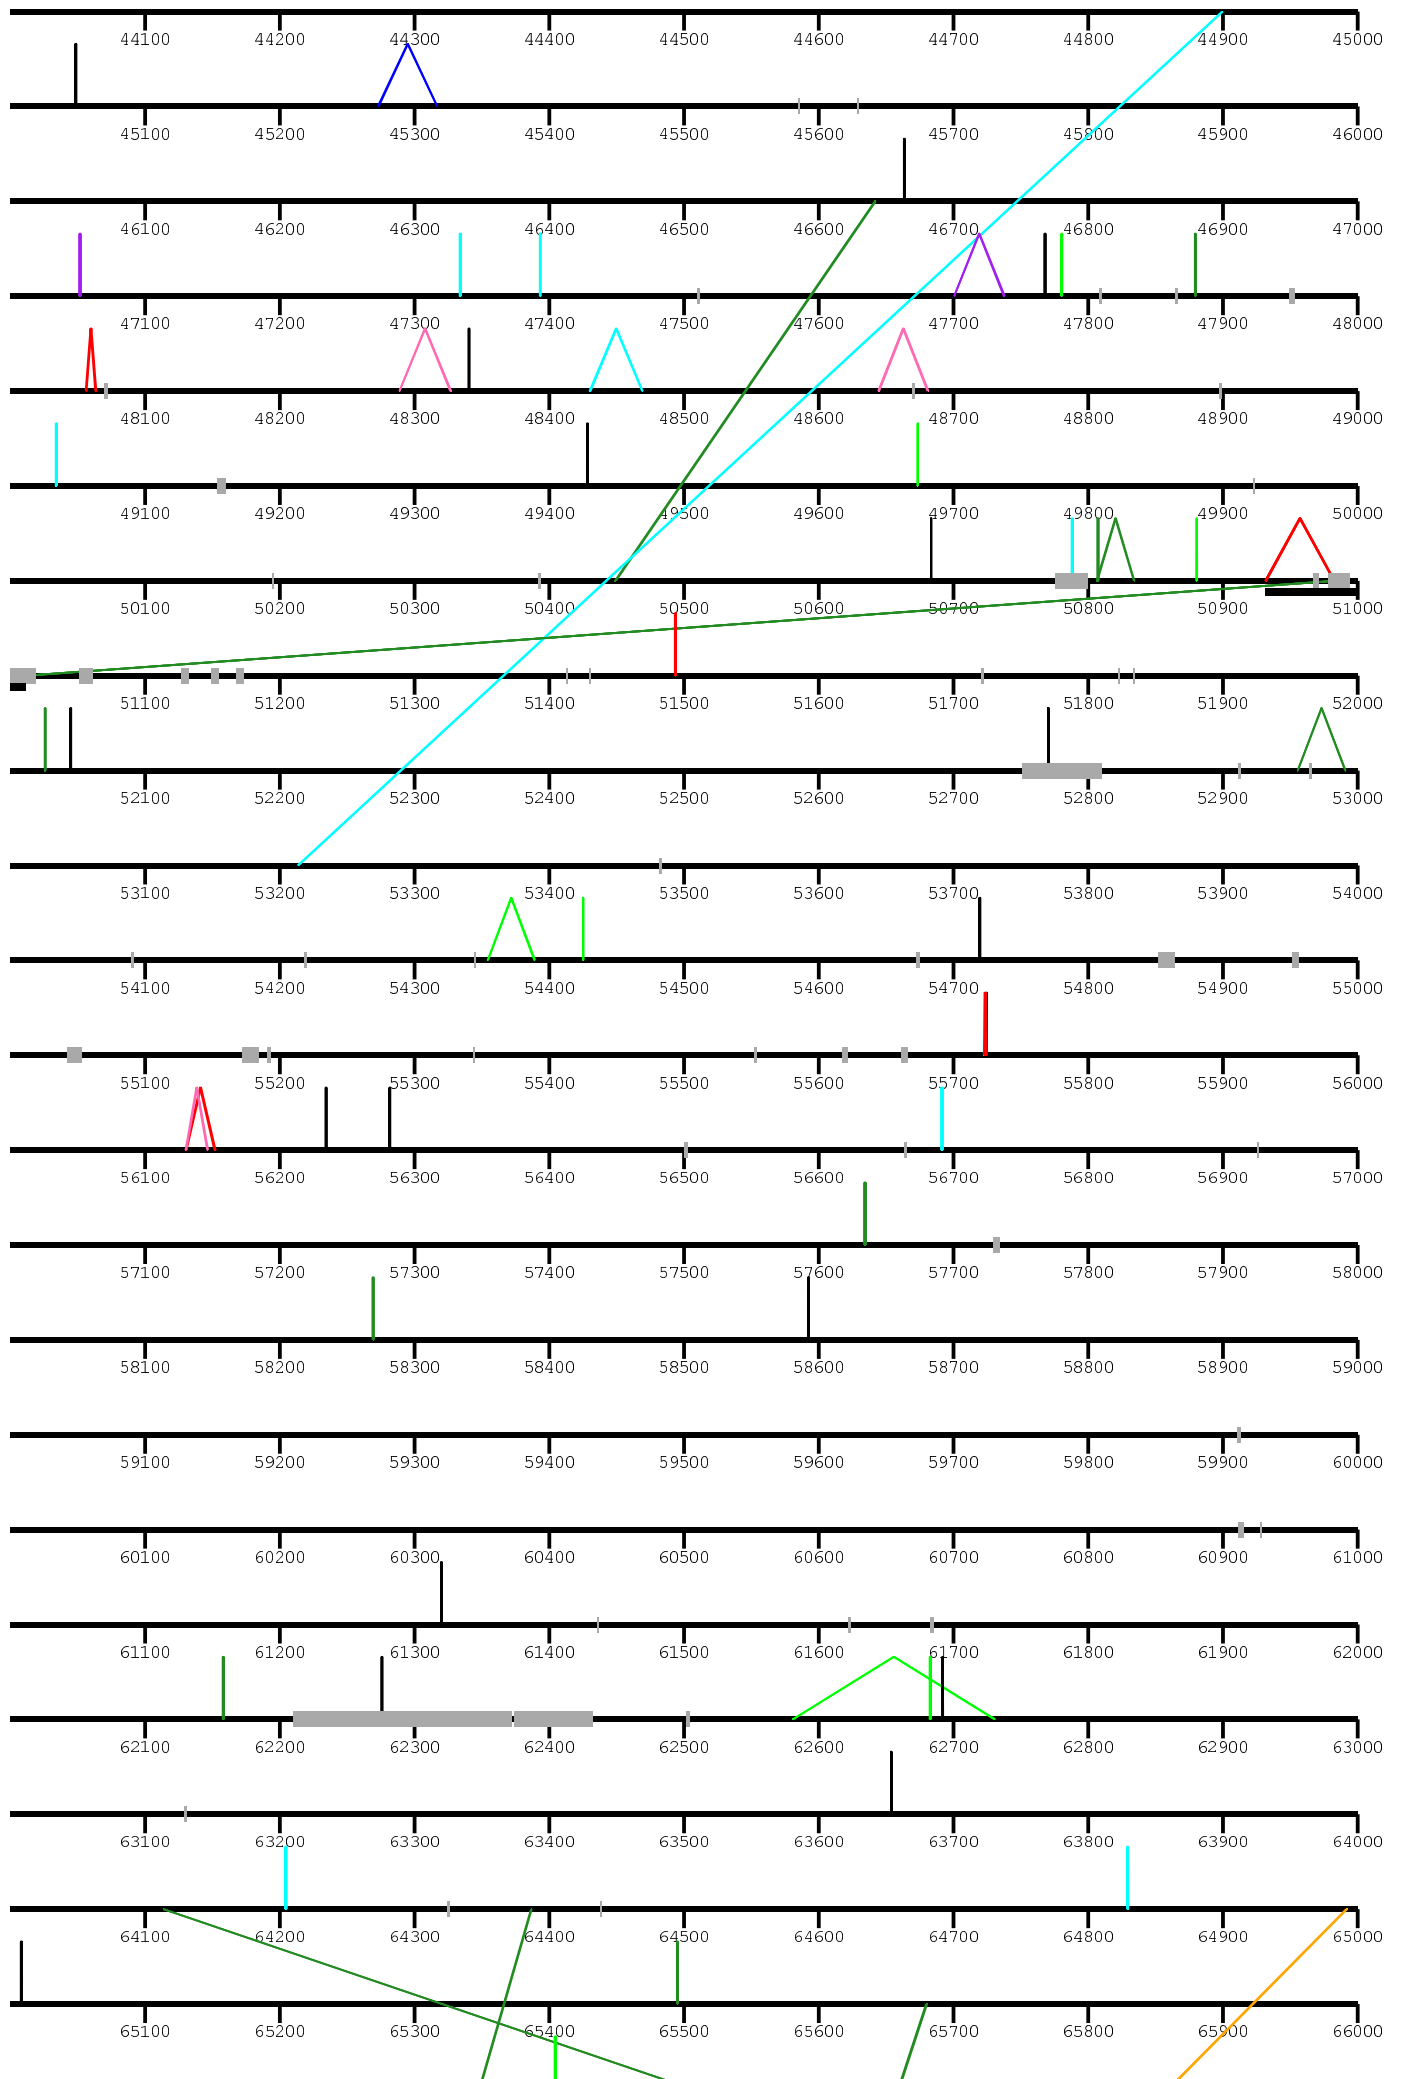

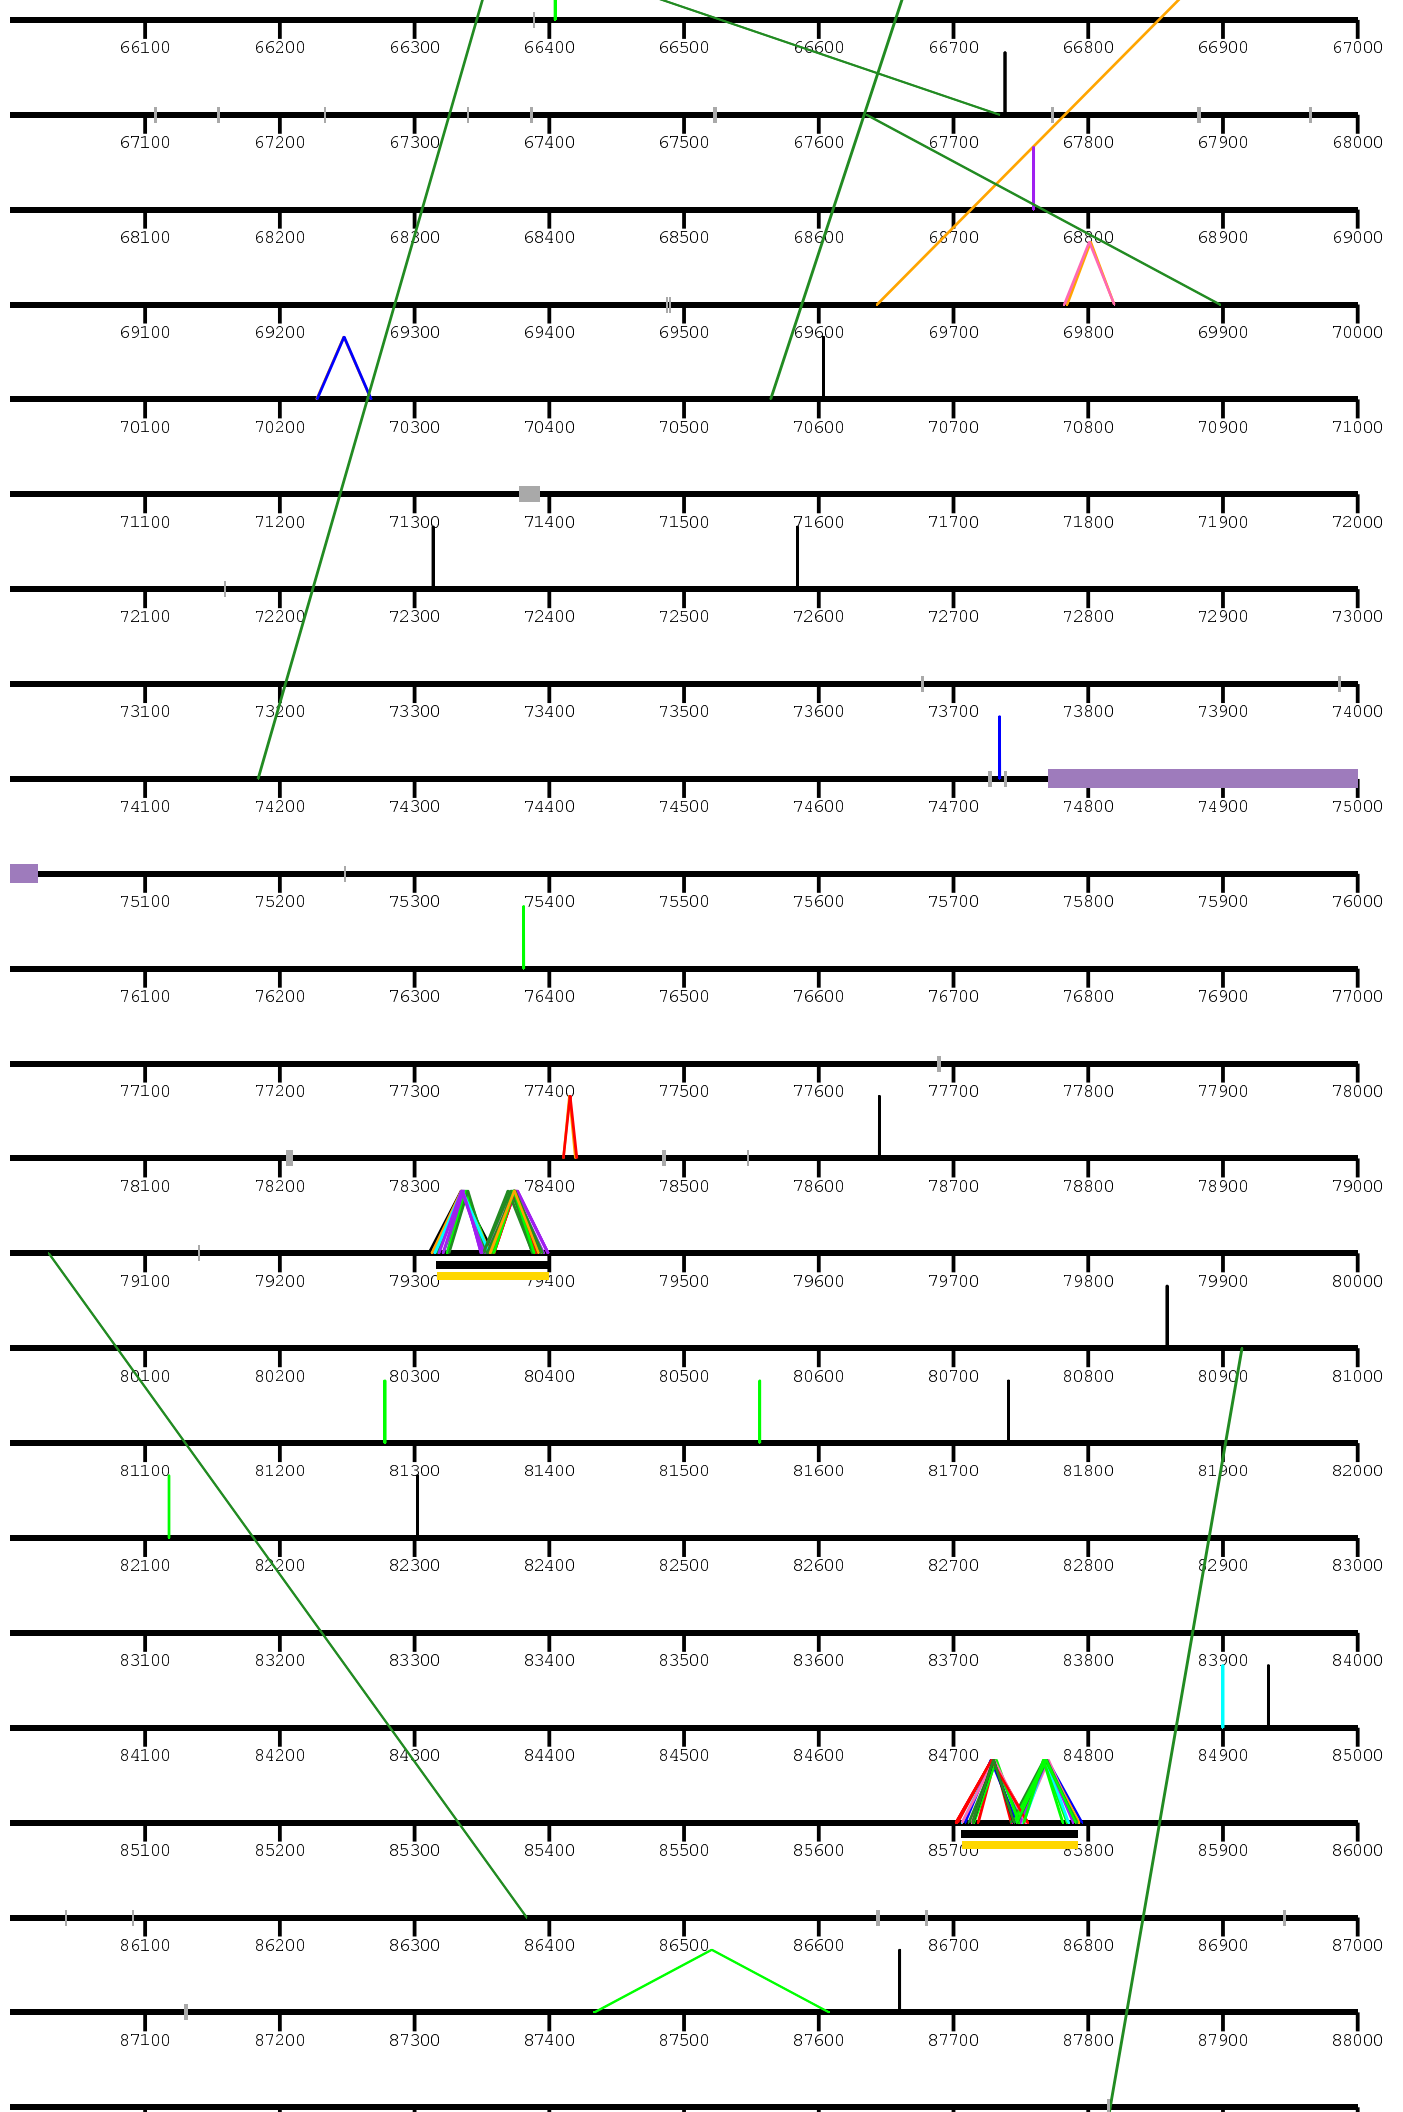

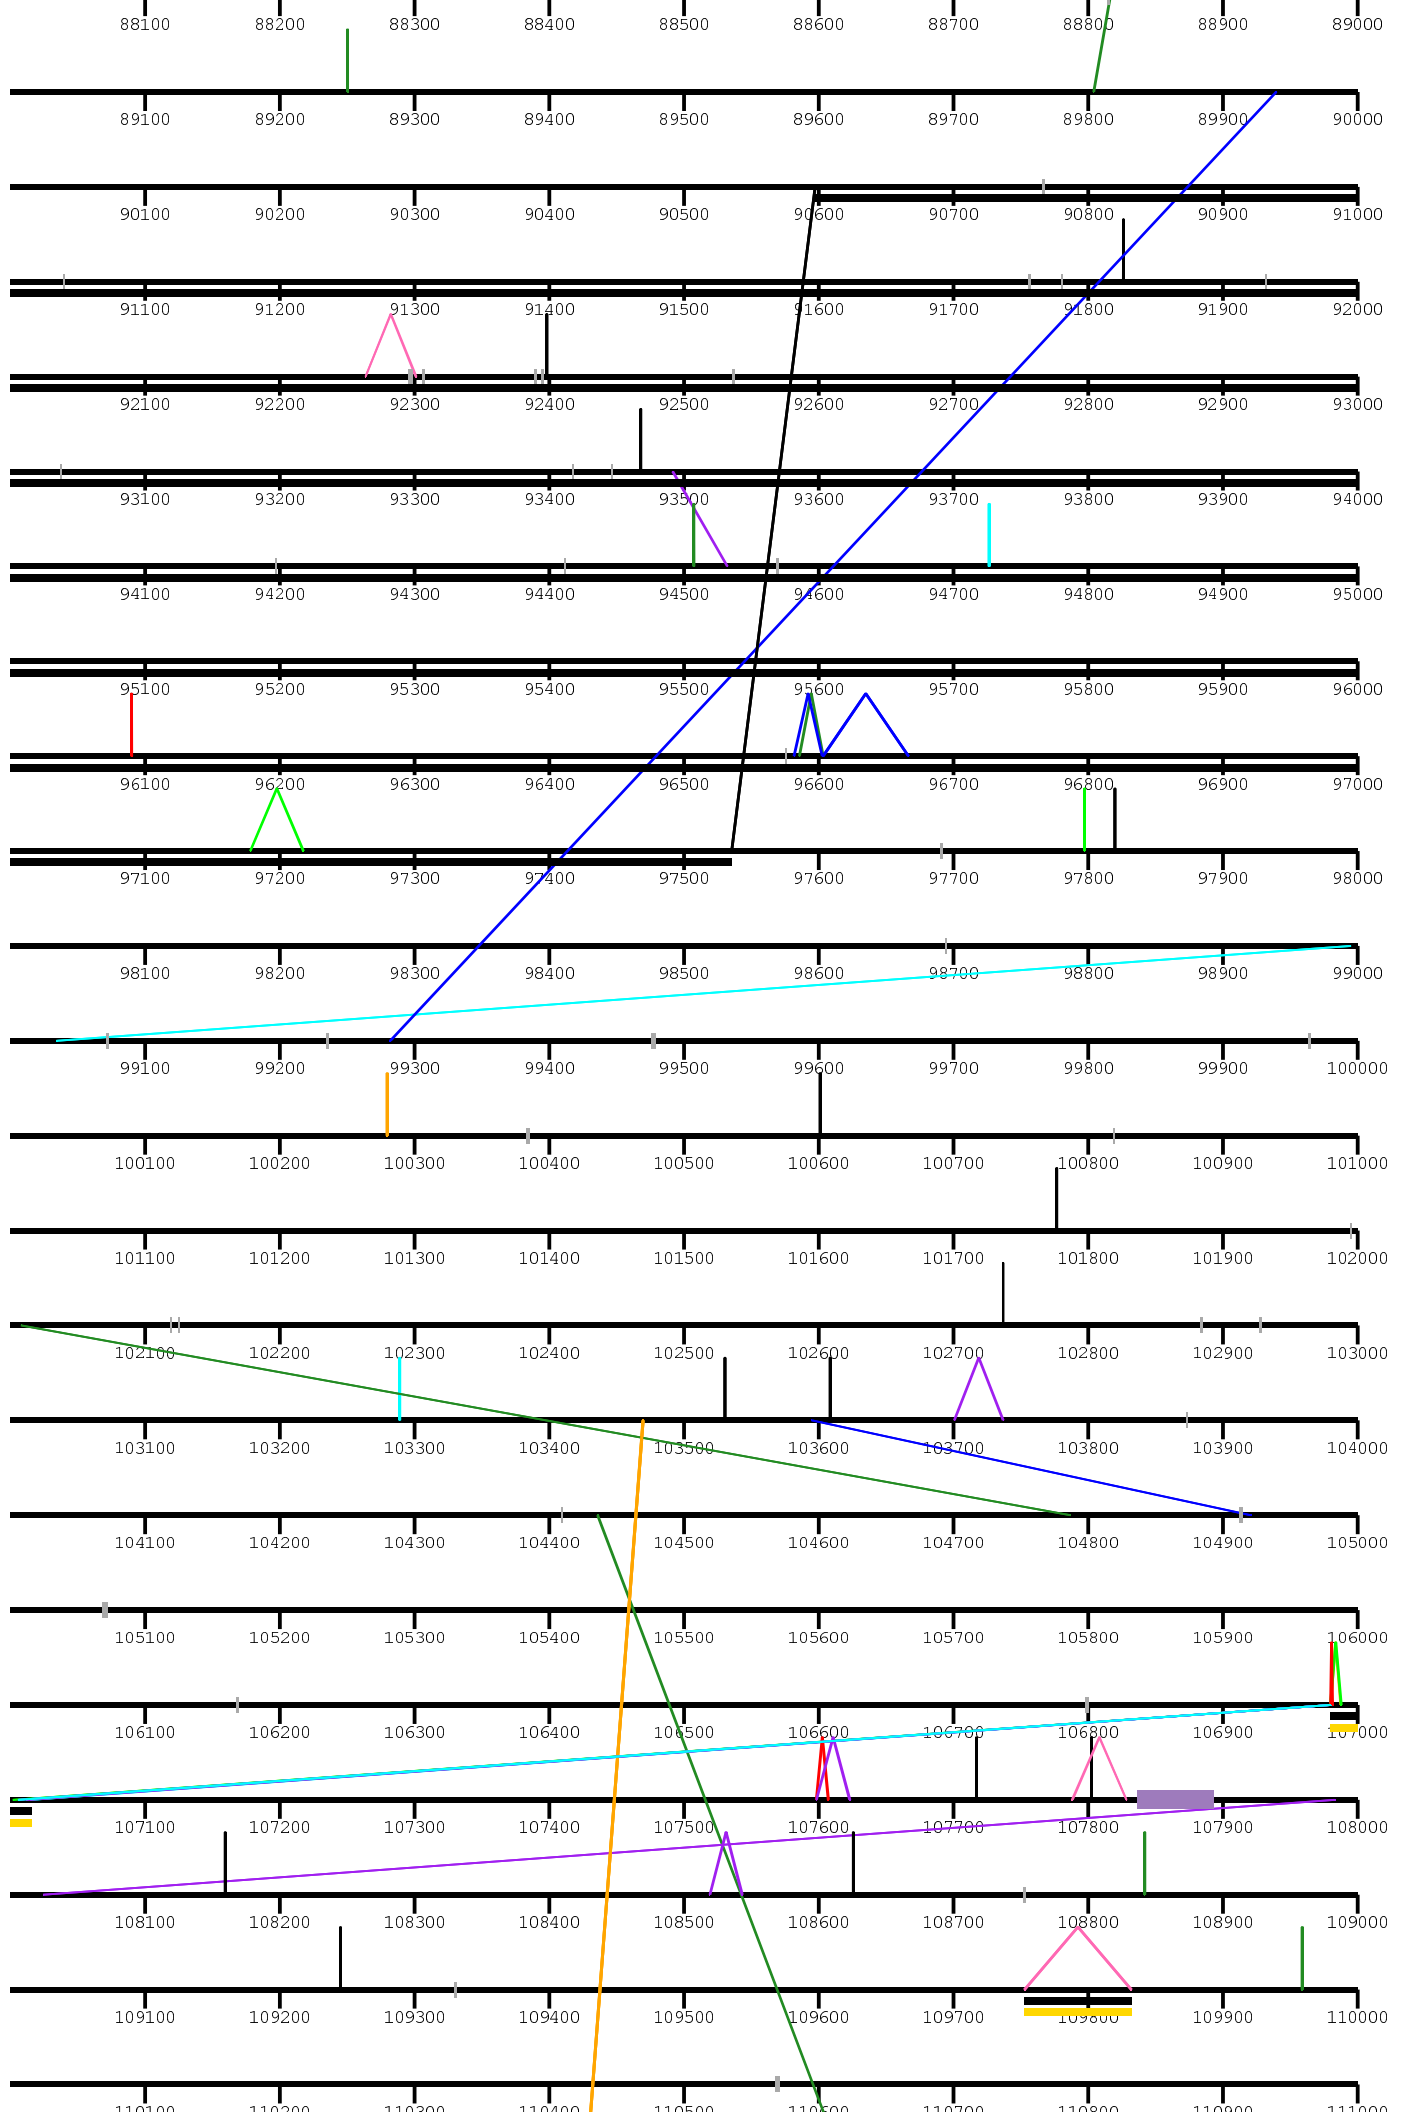

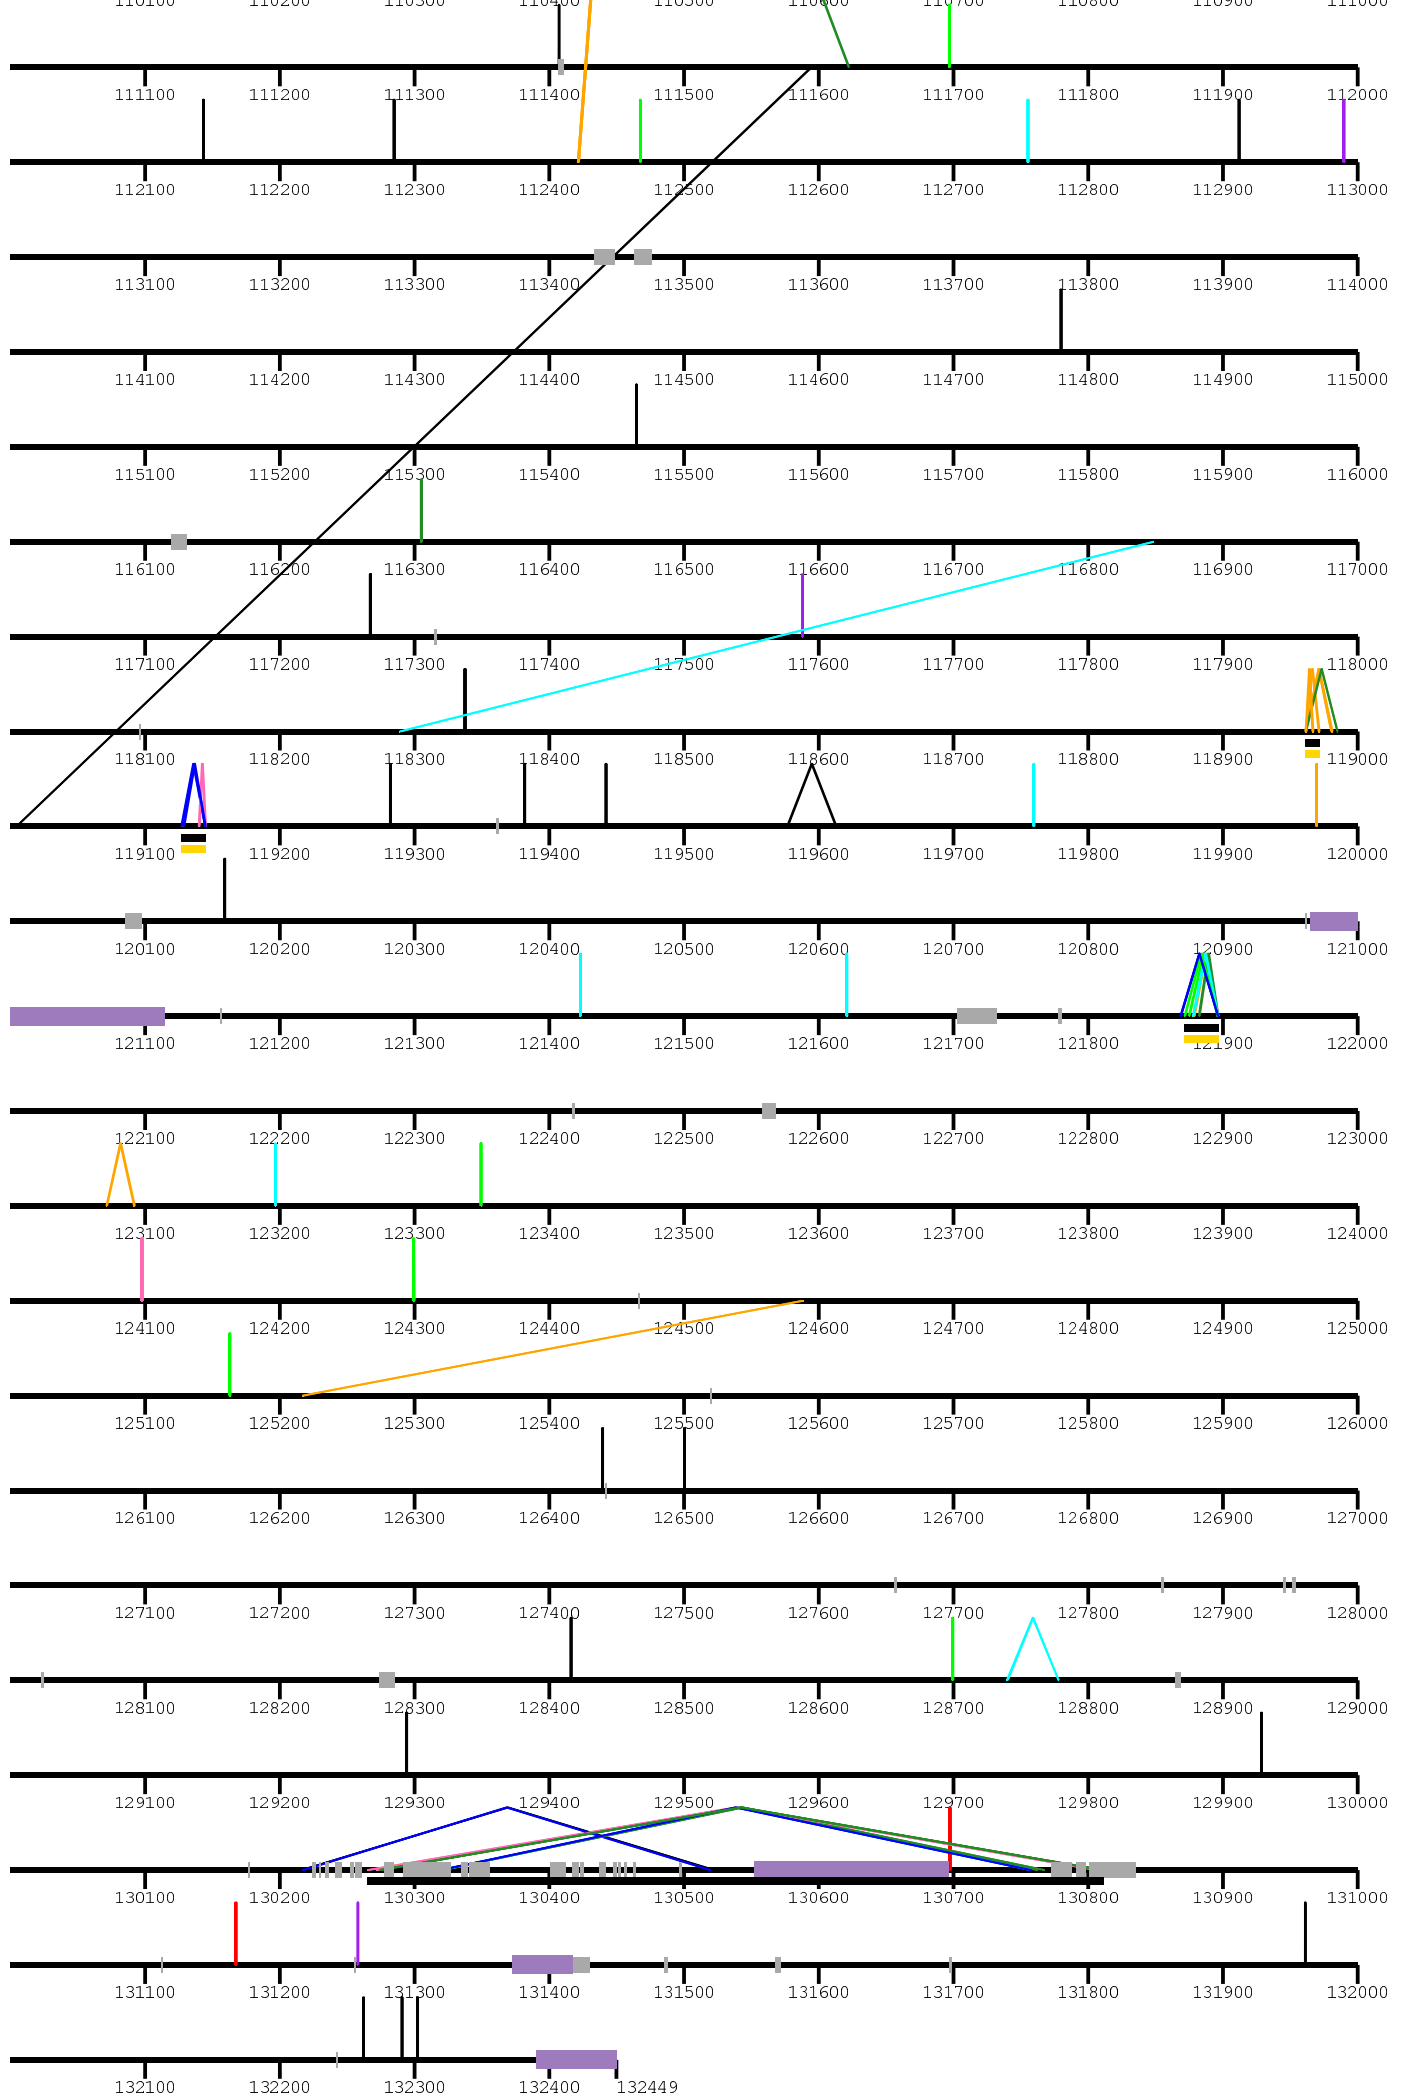



chr13

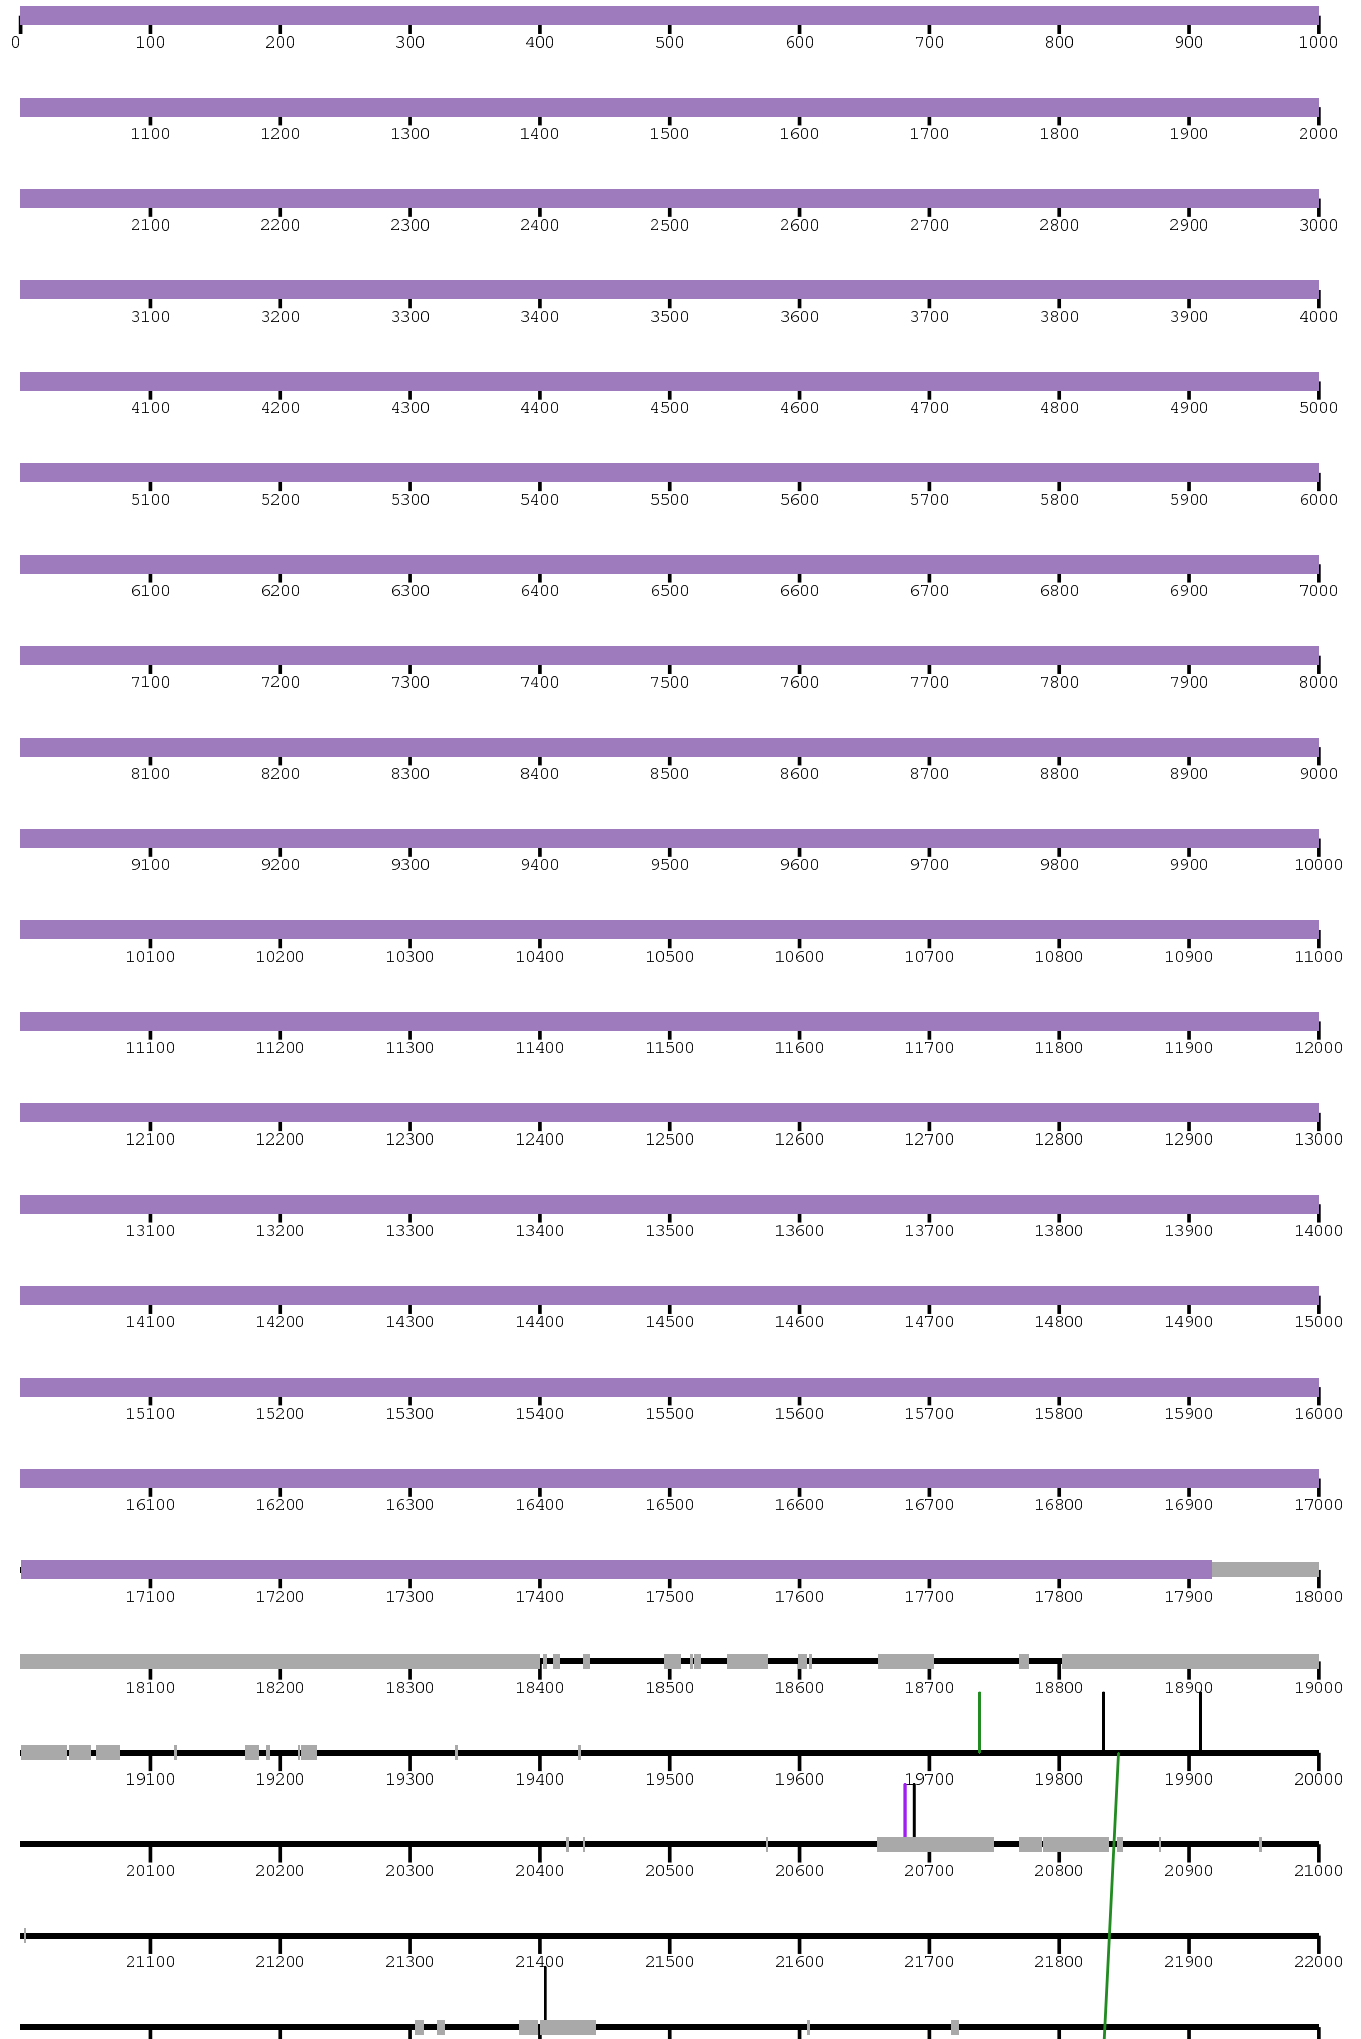

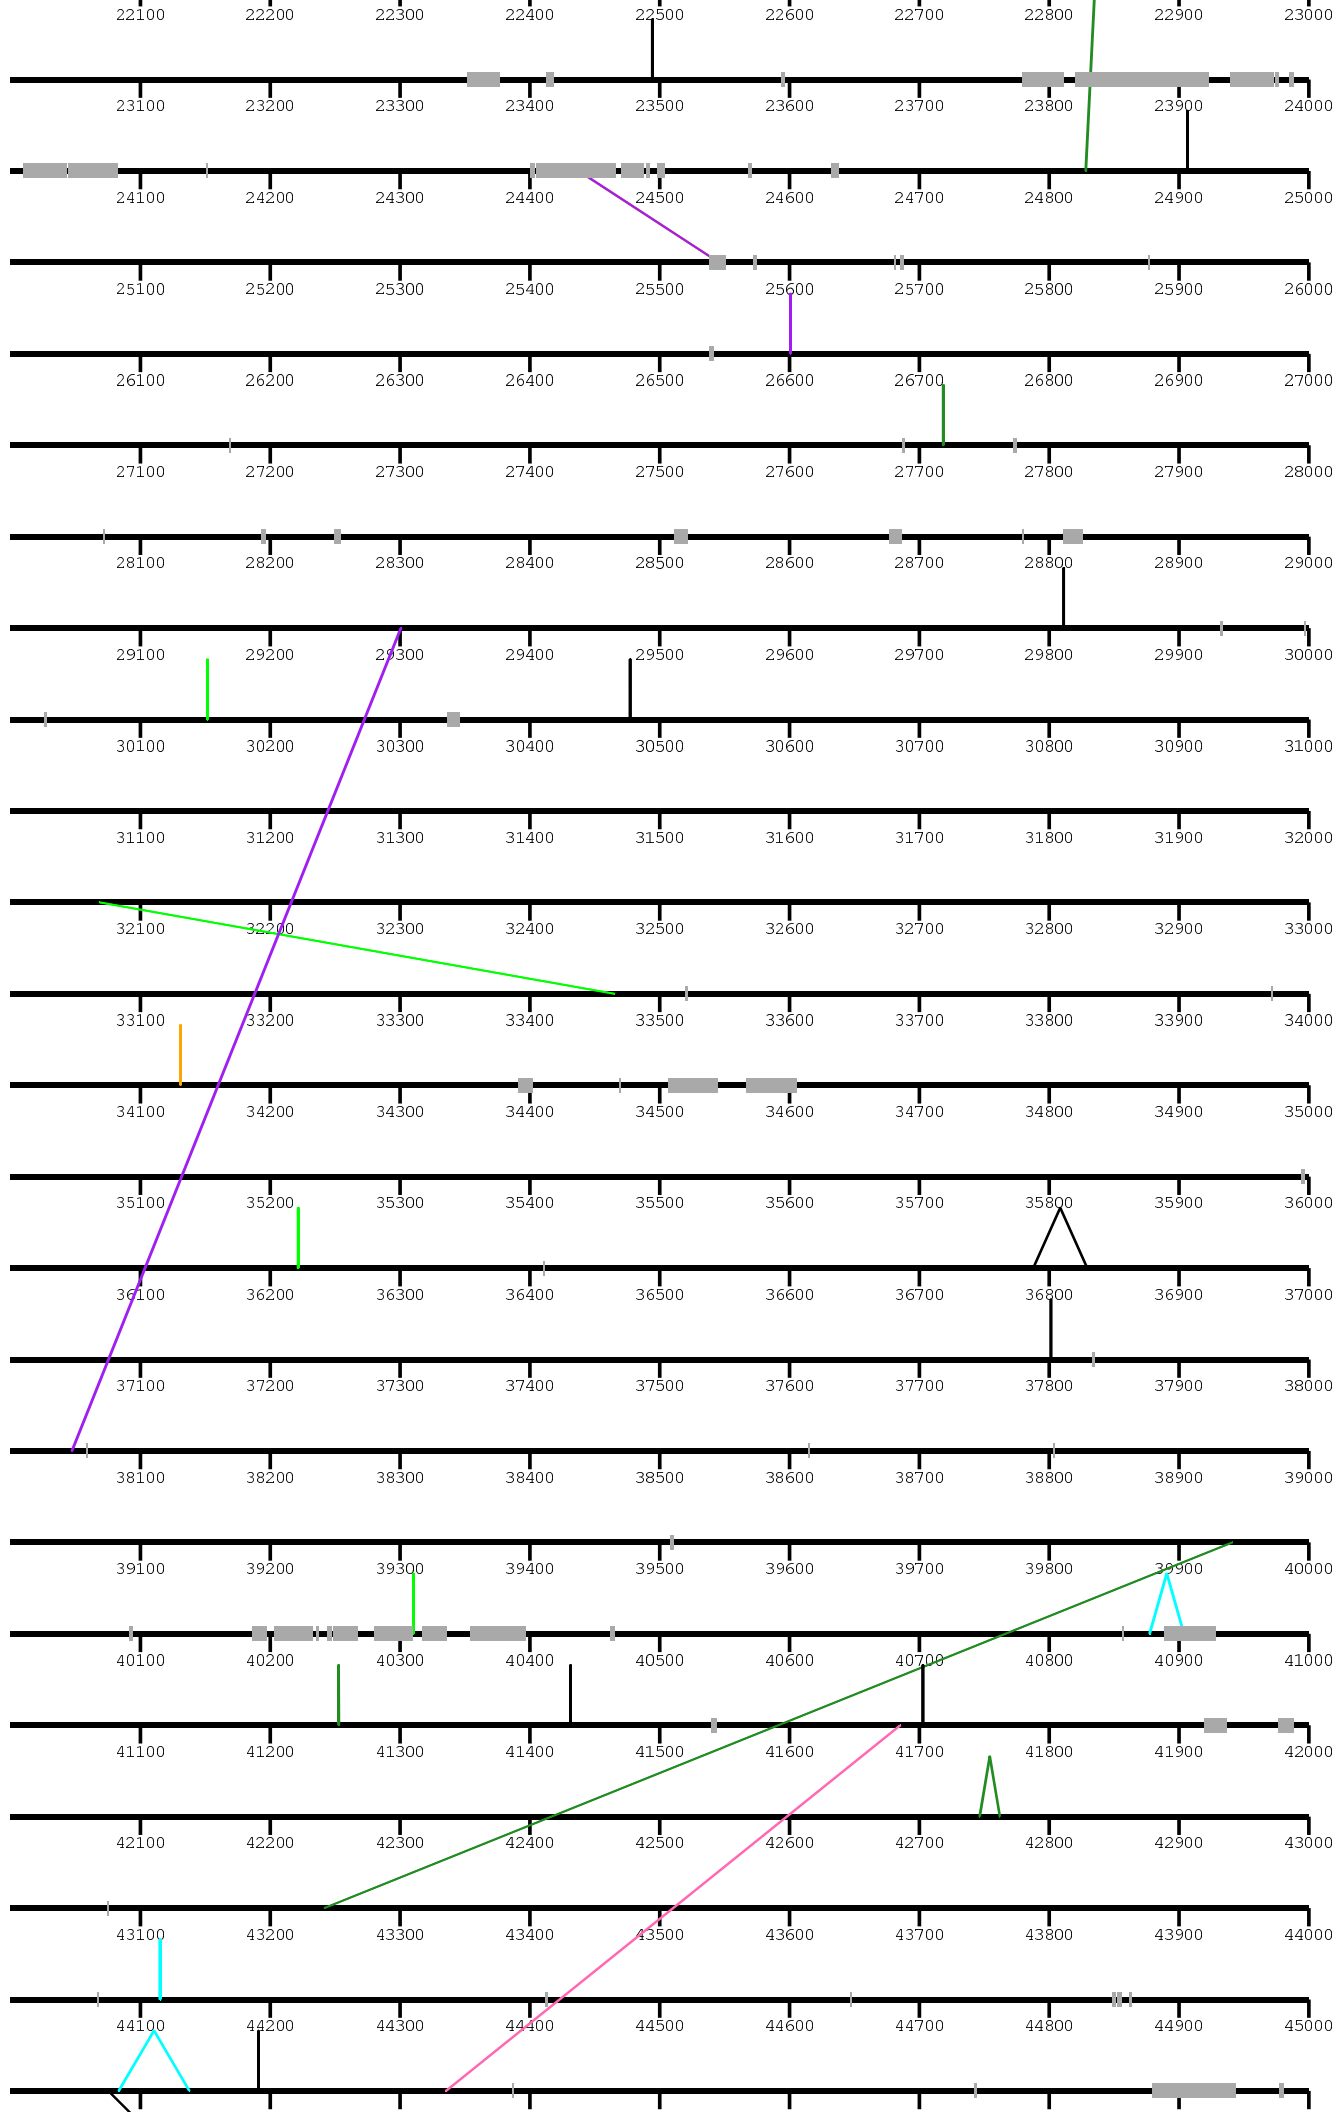

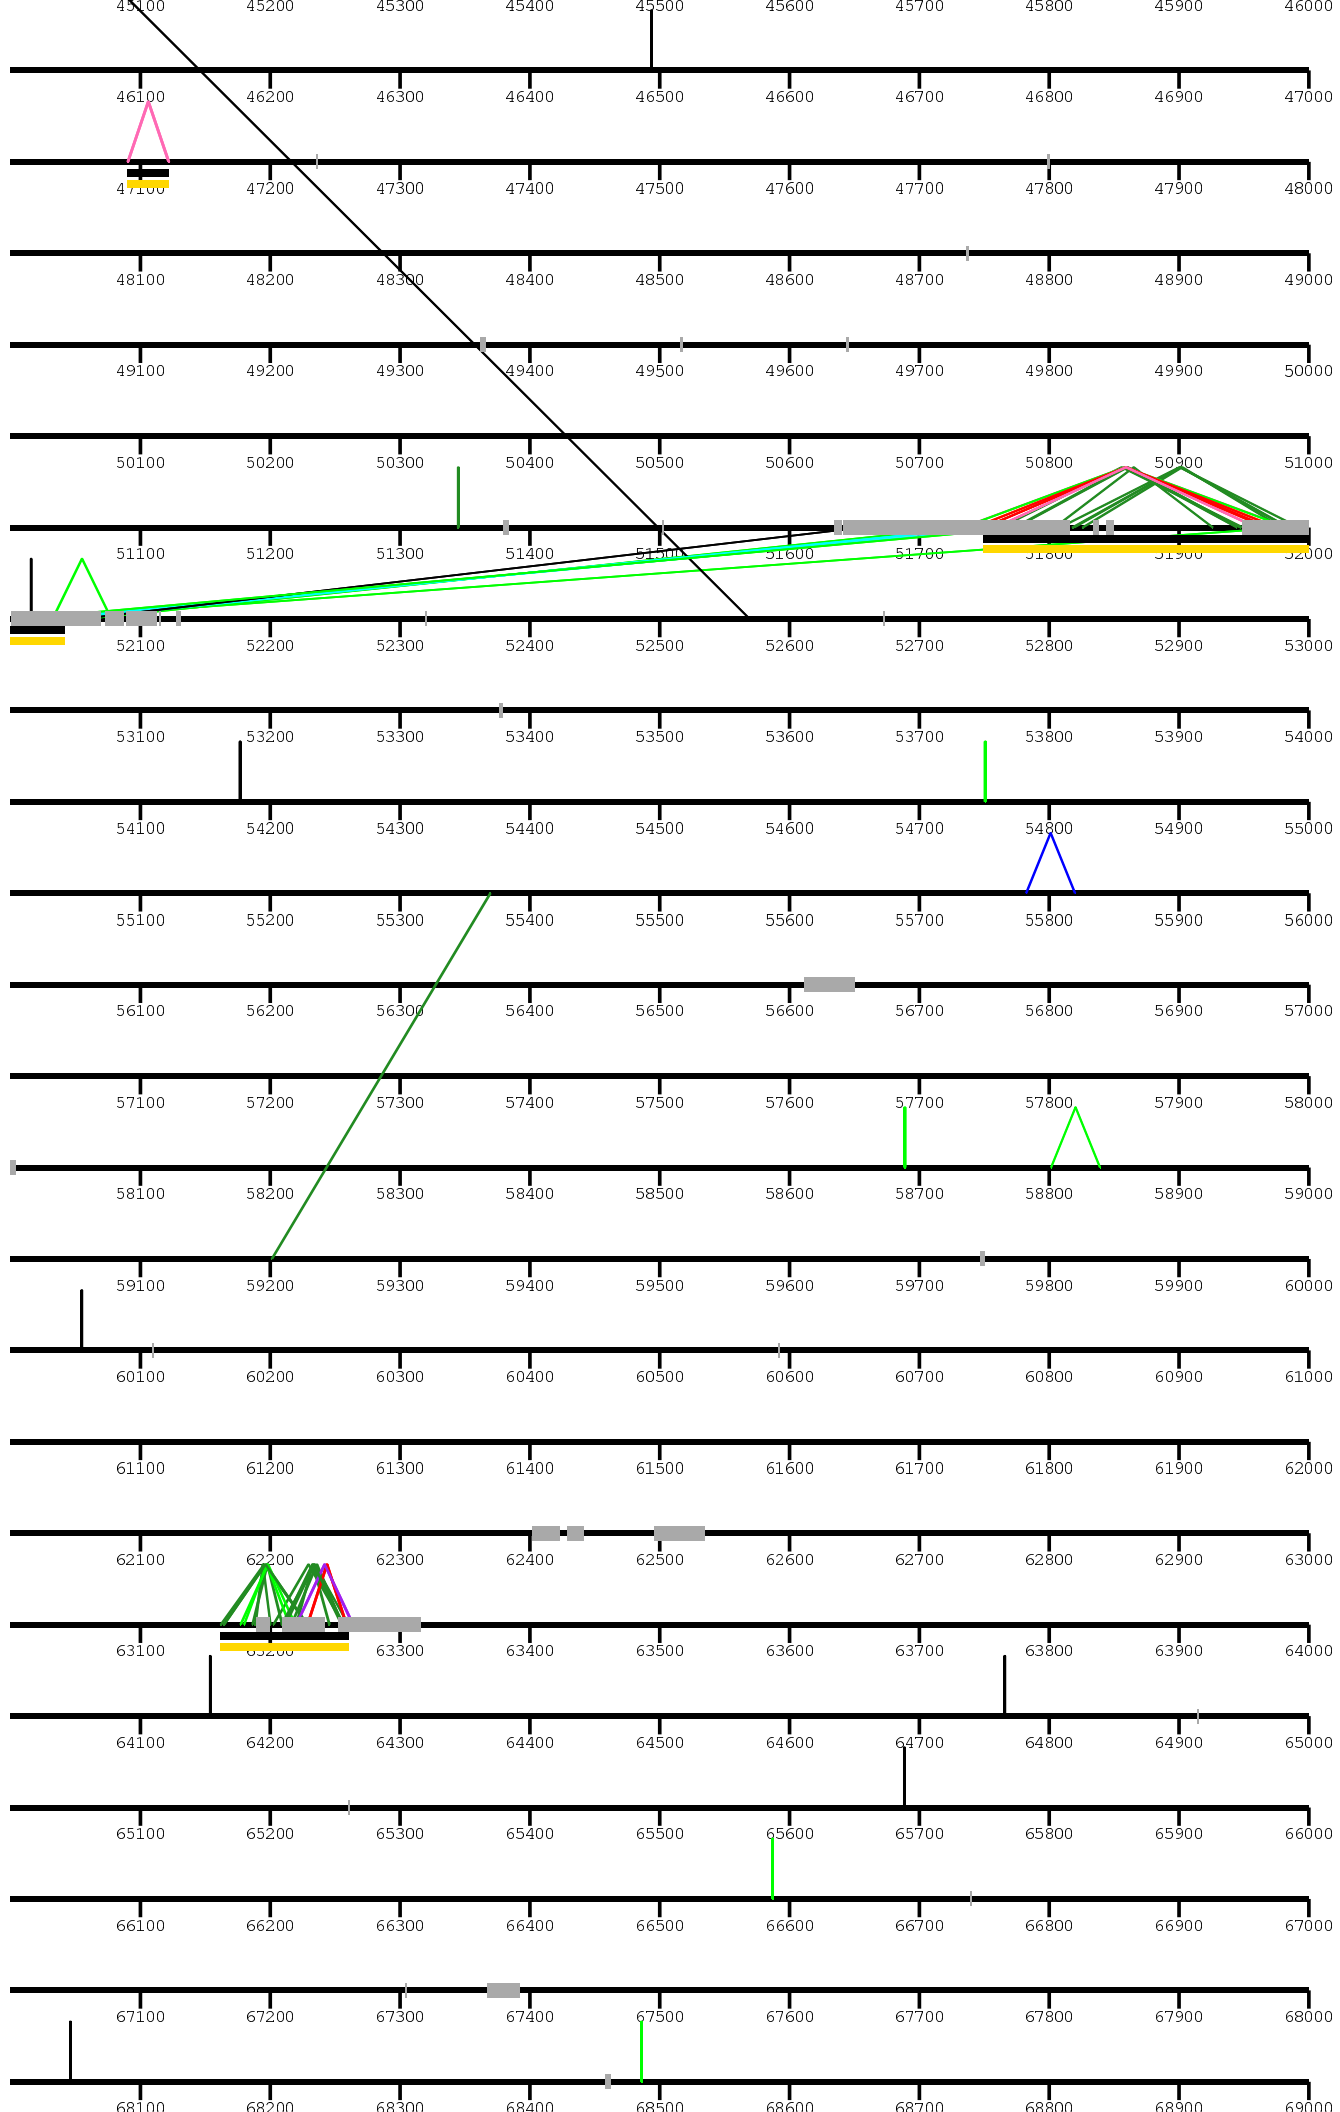

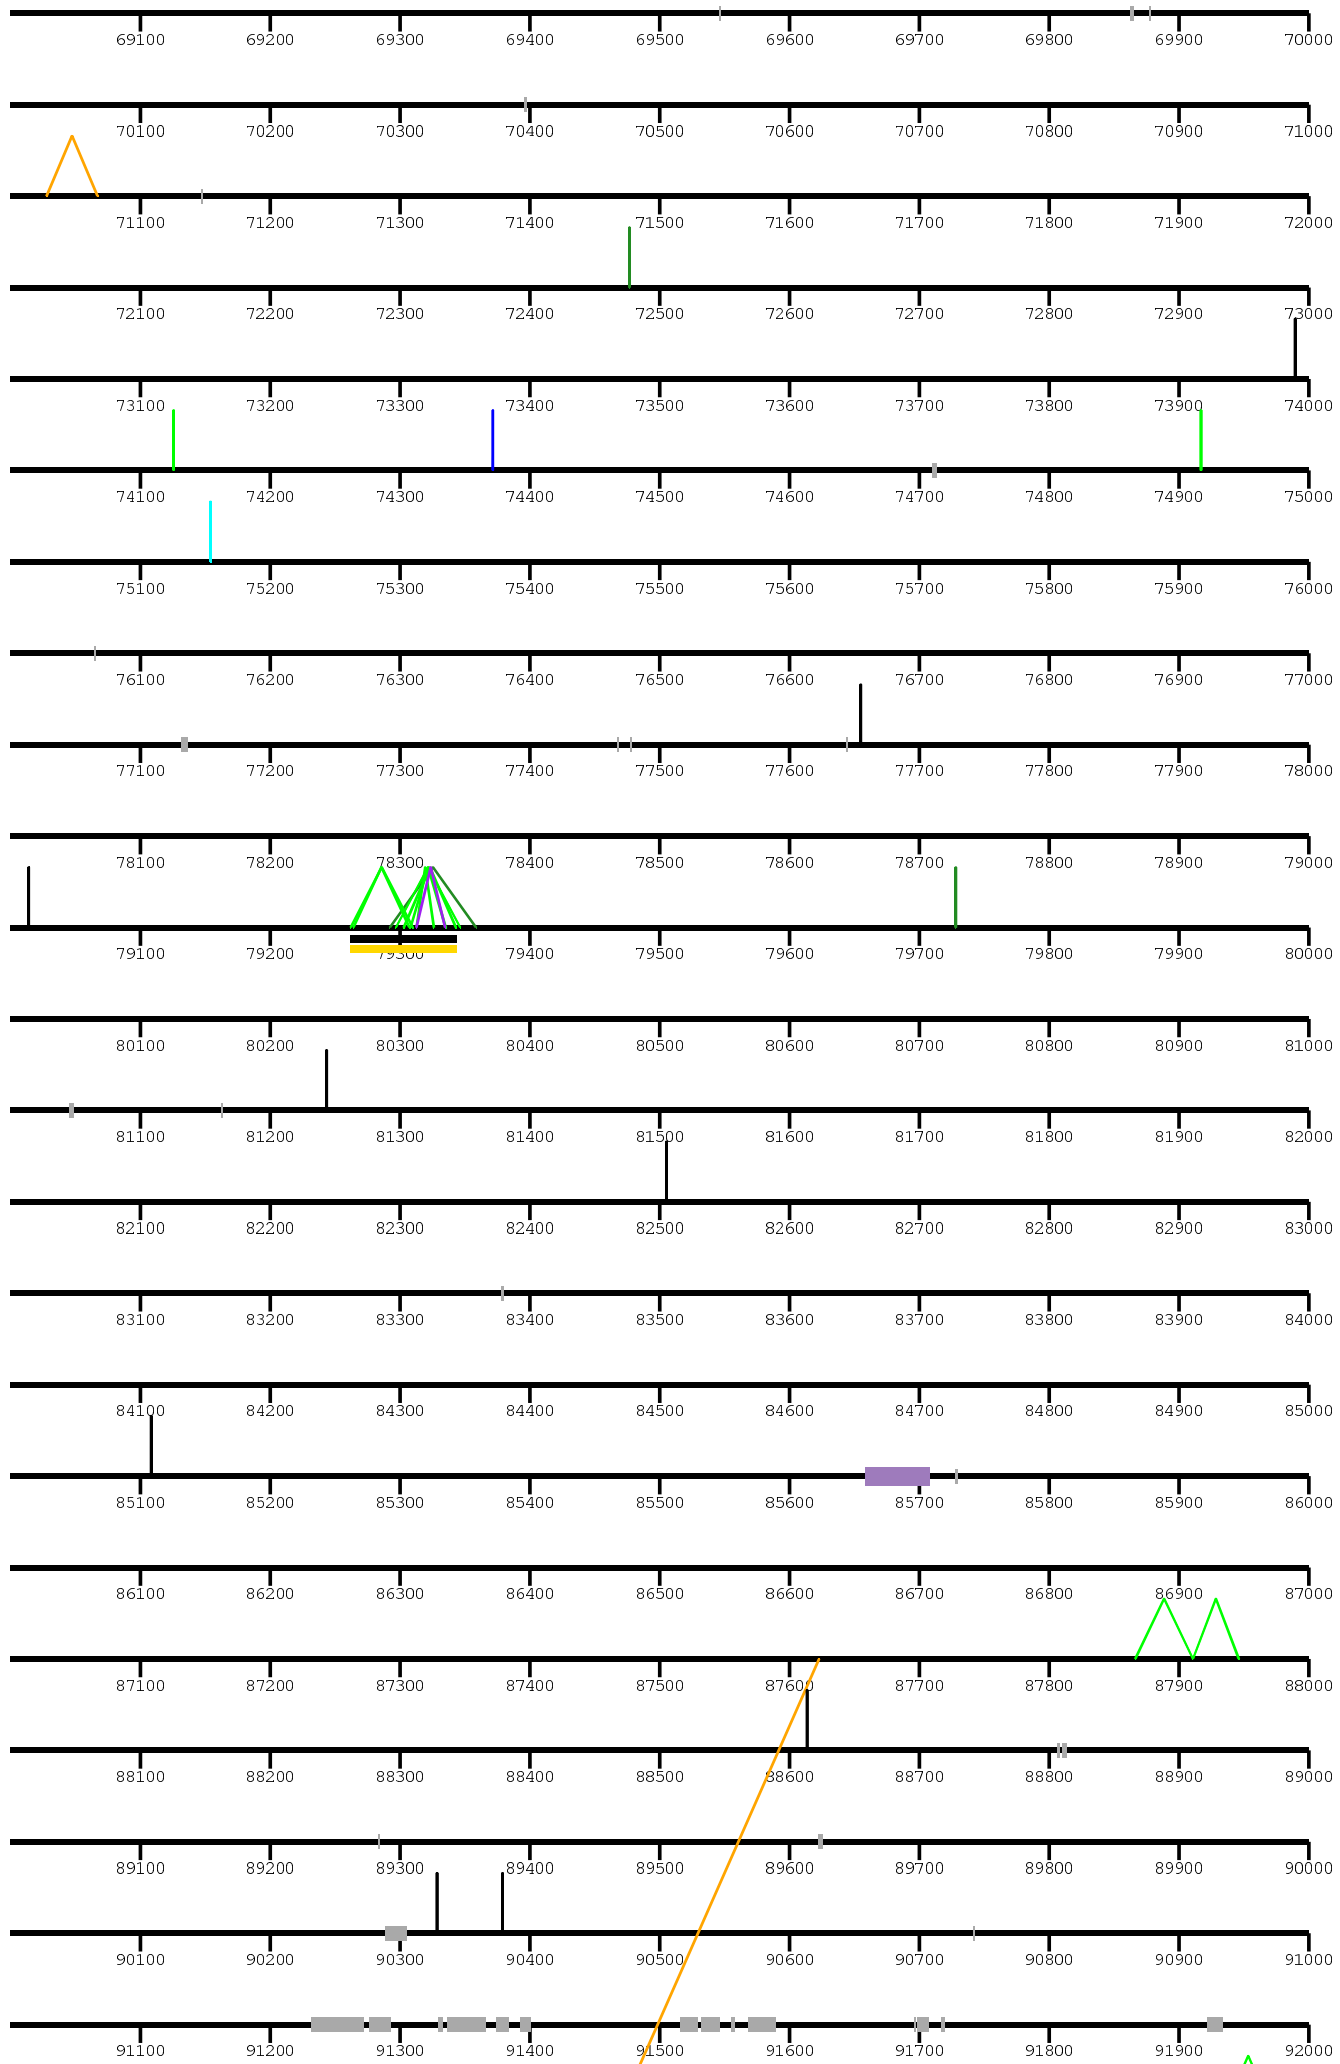

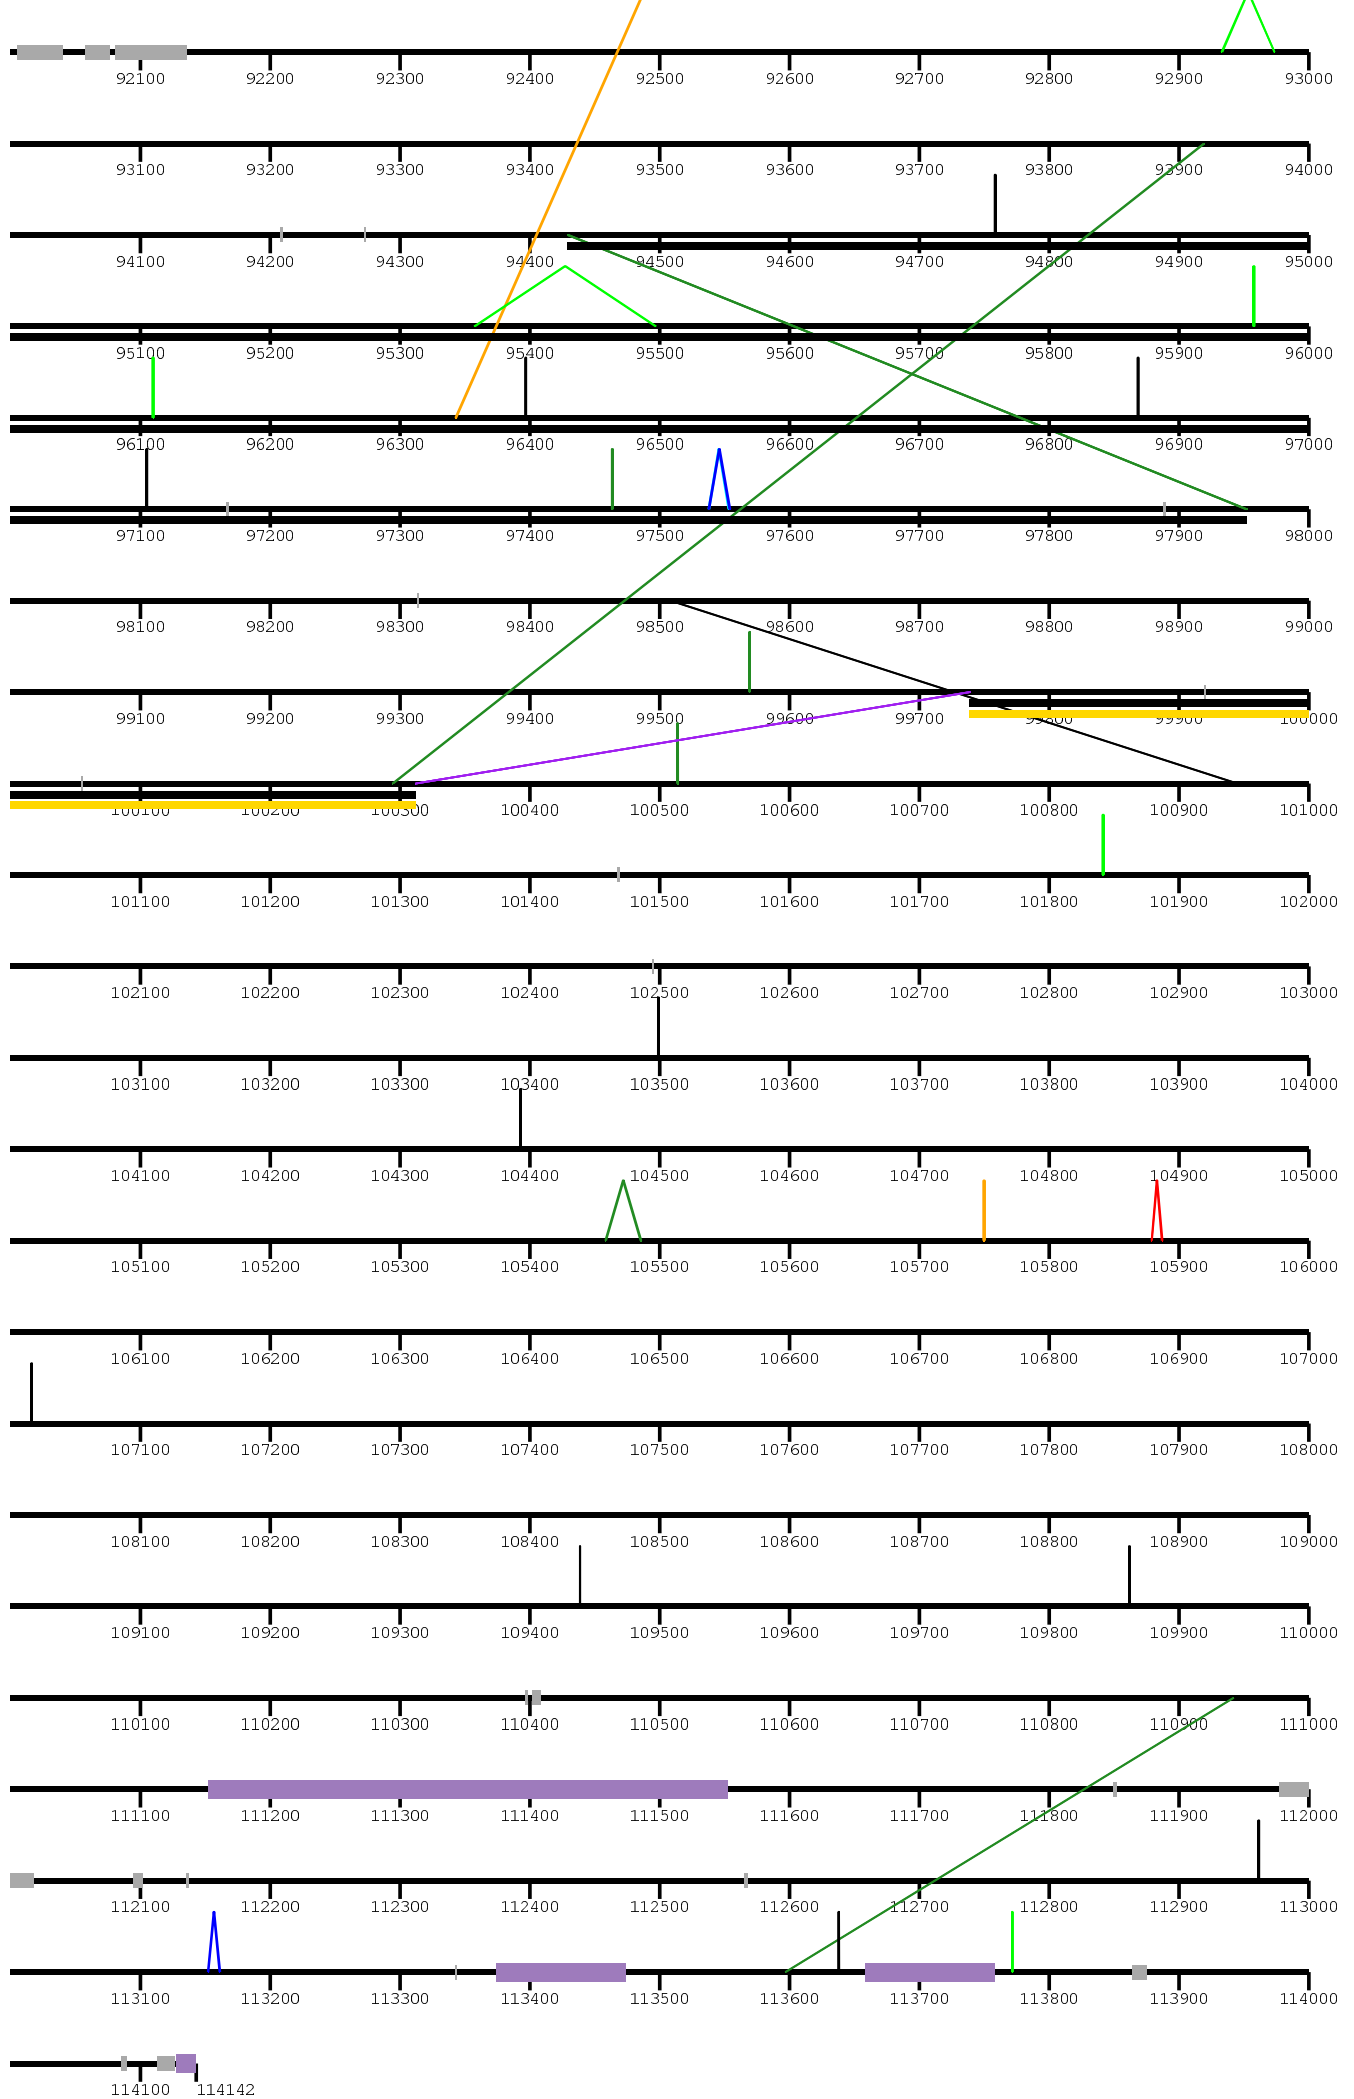

chr14

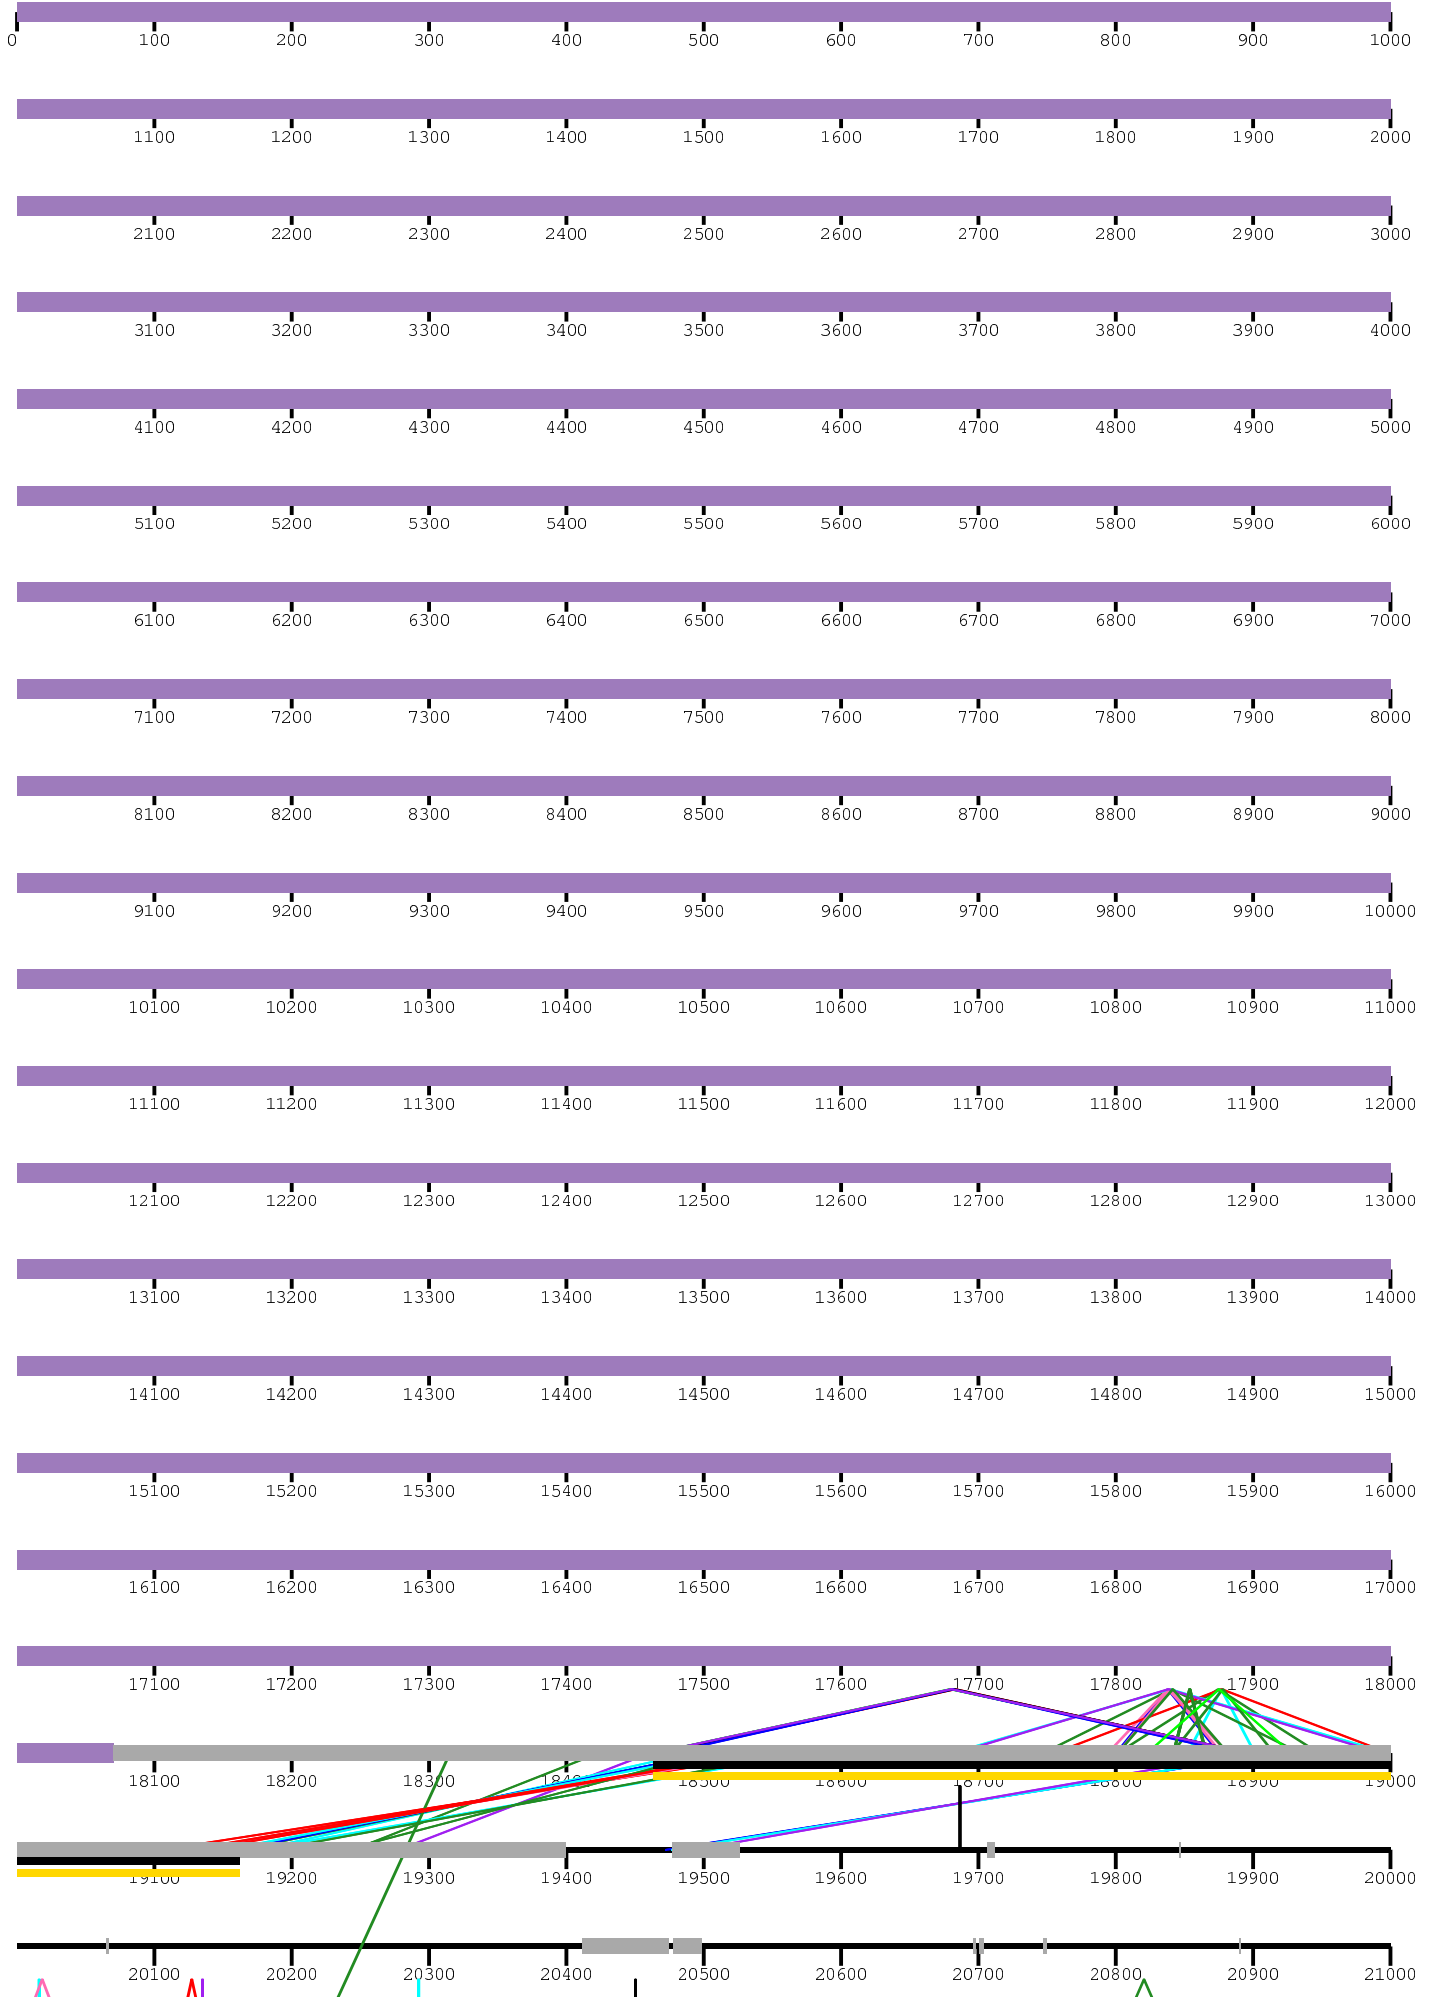

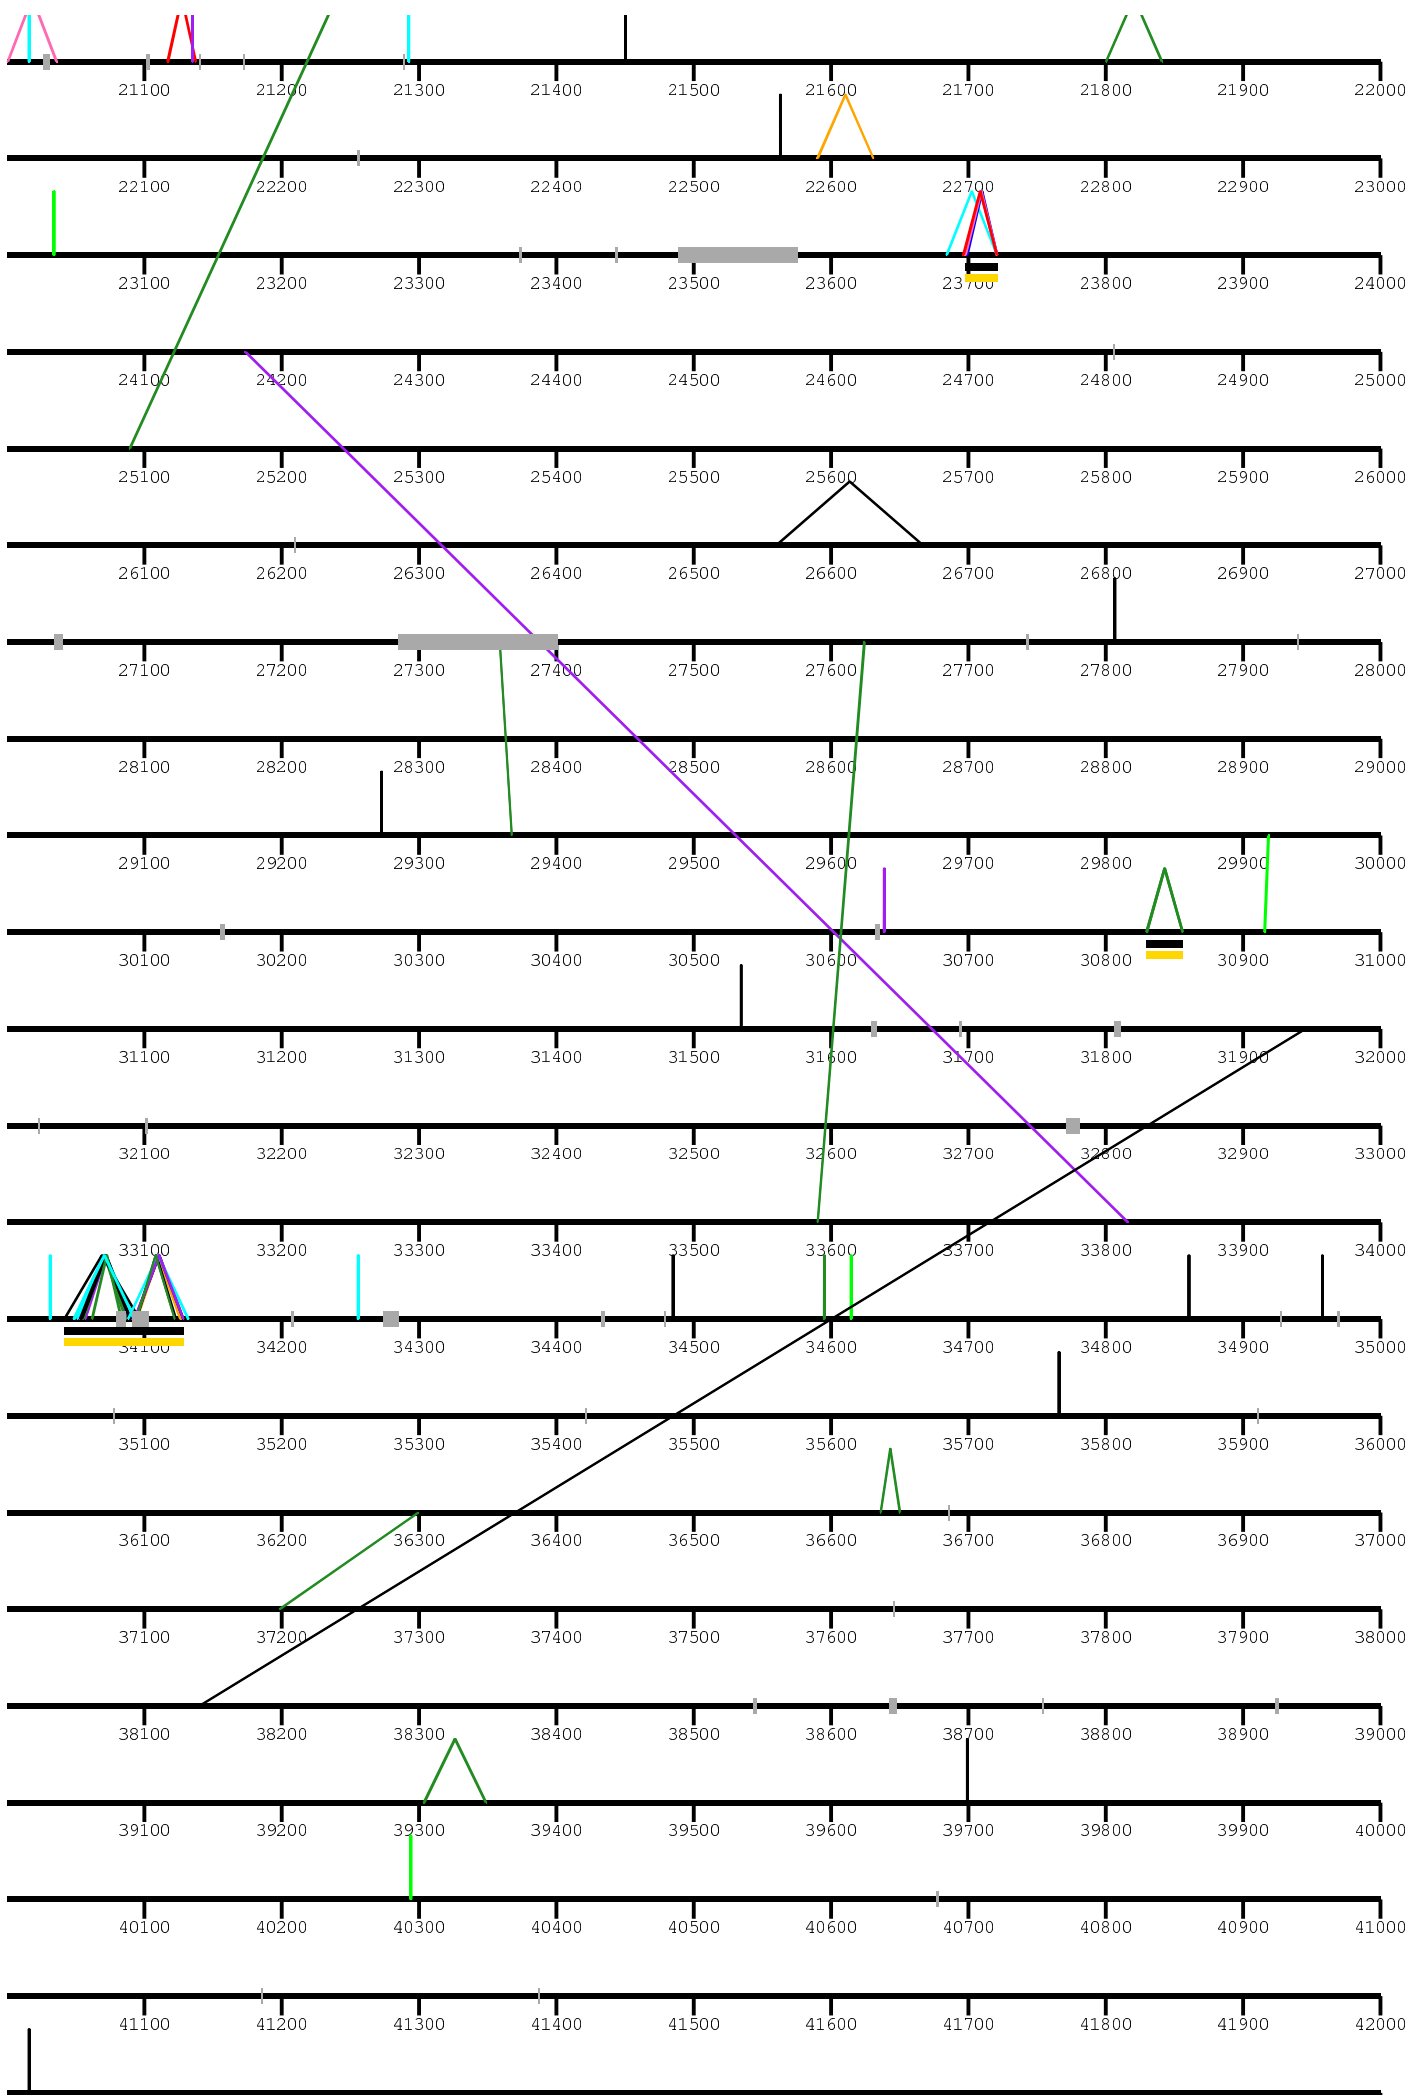

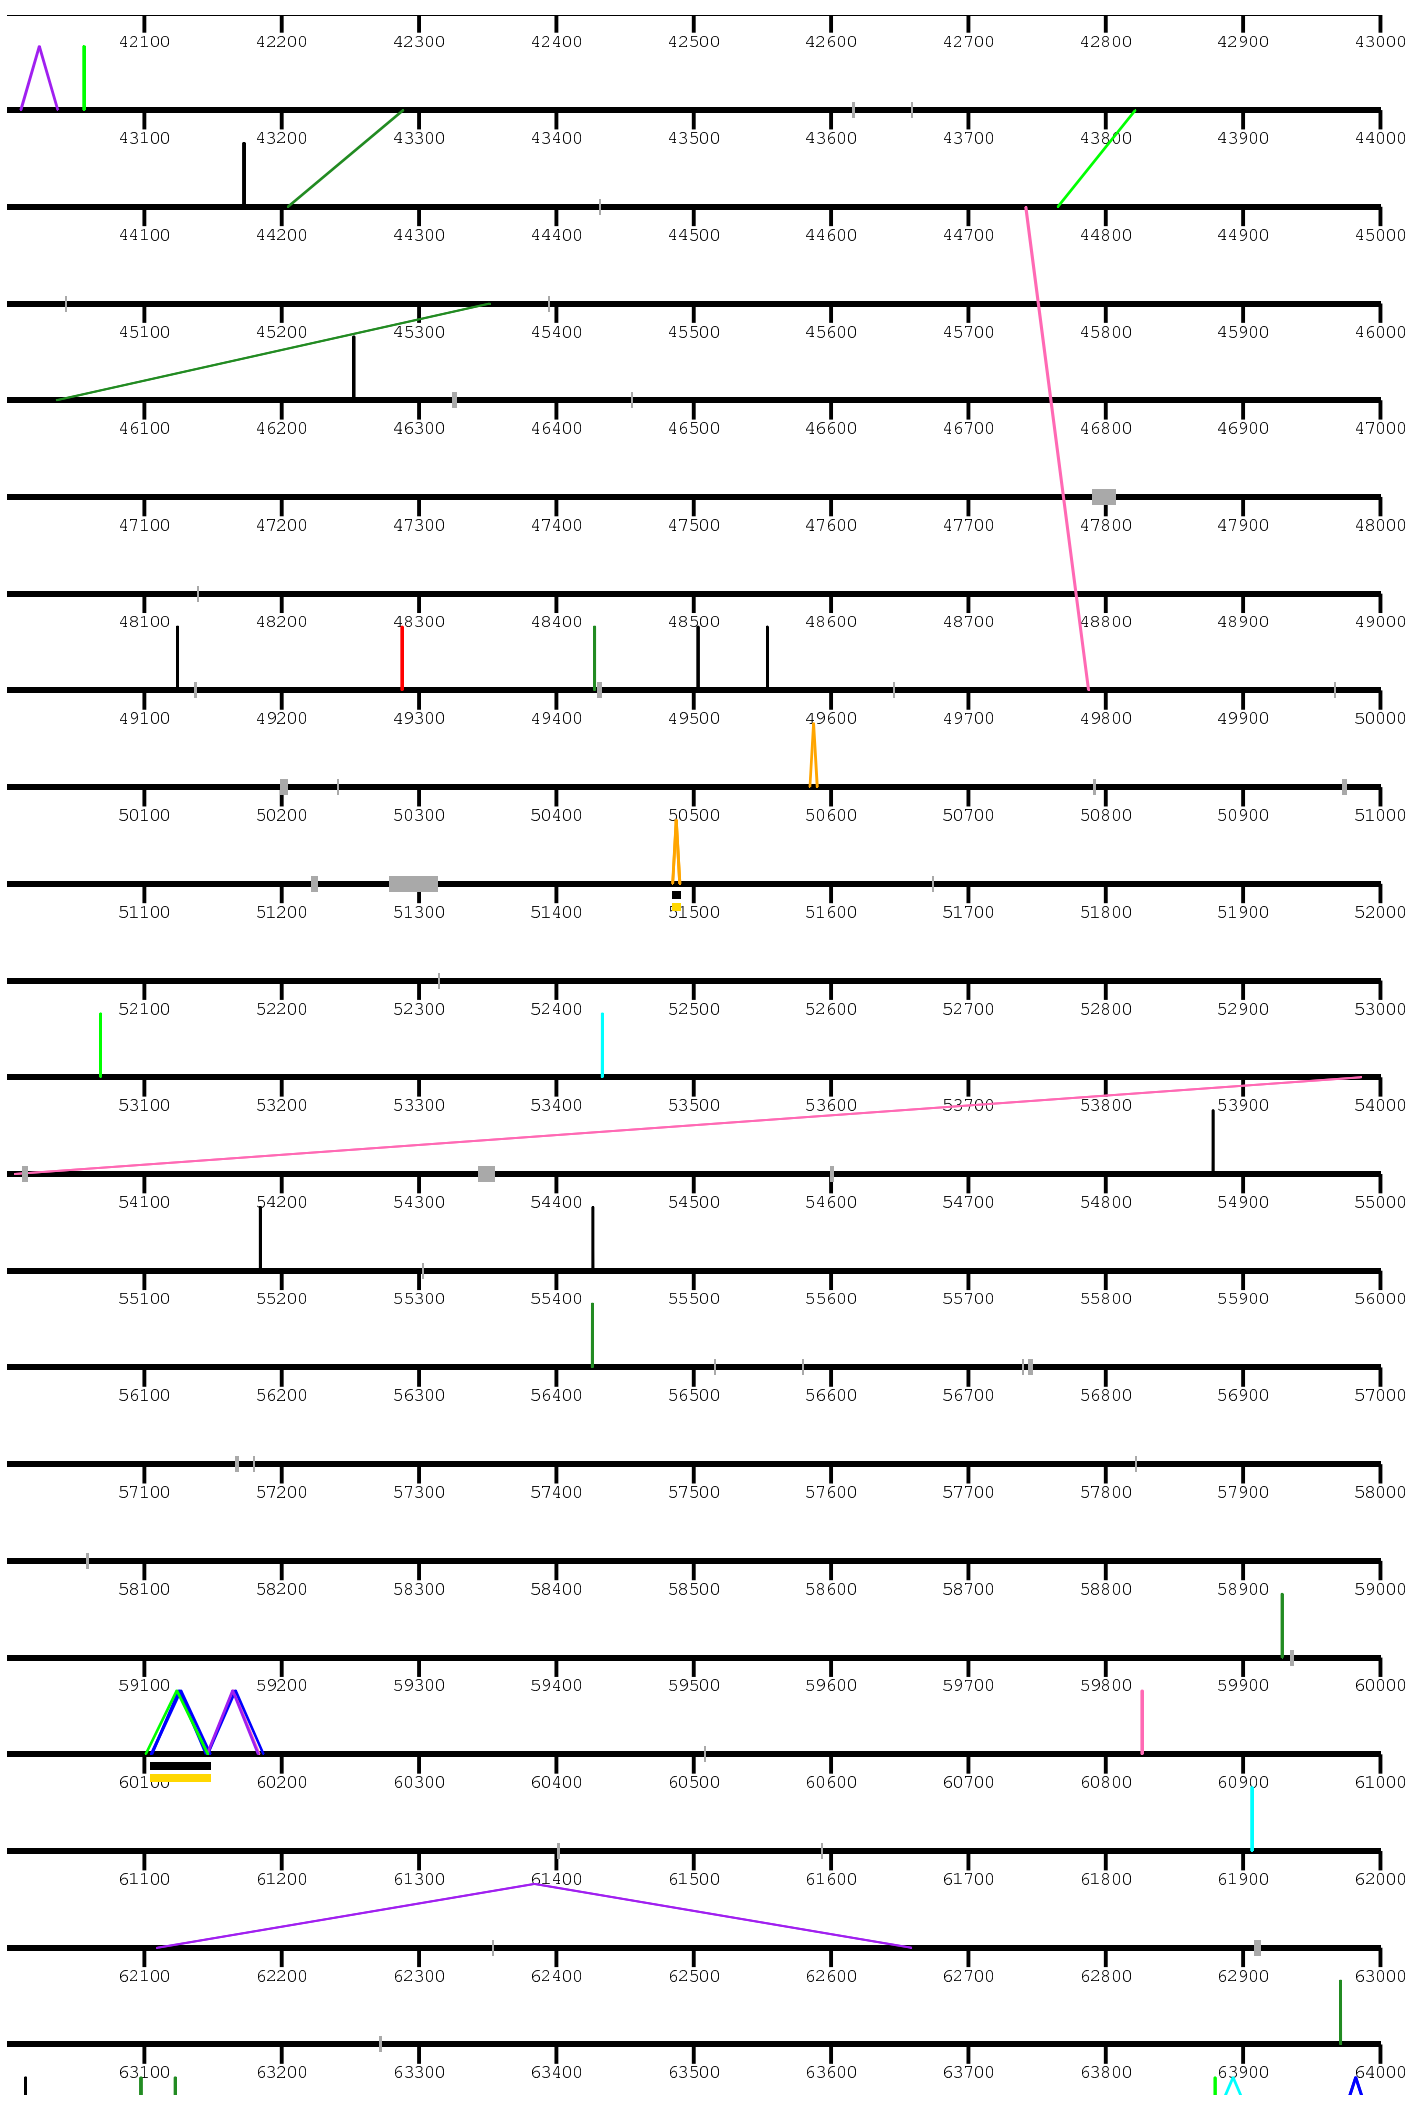



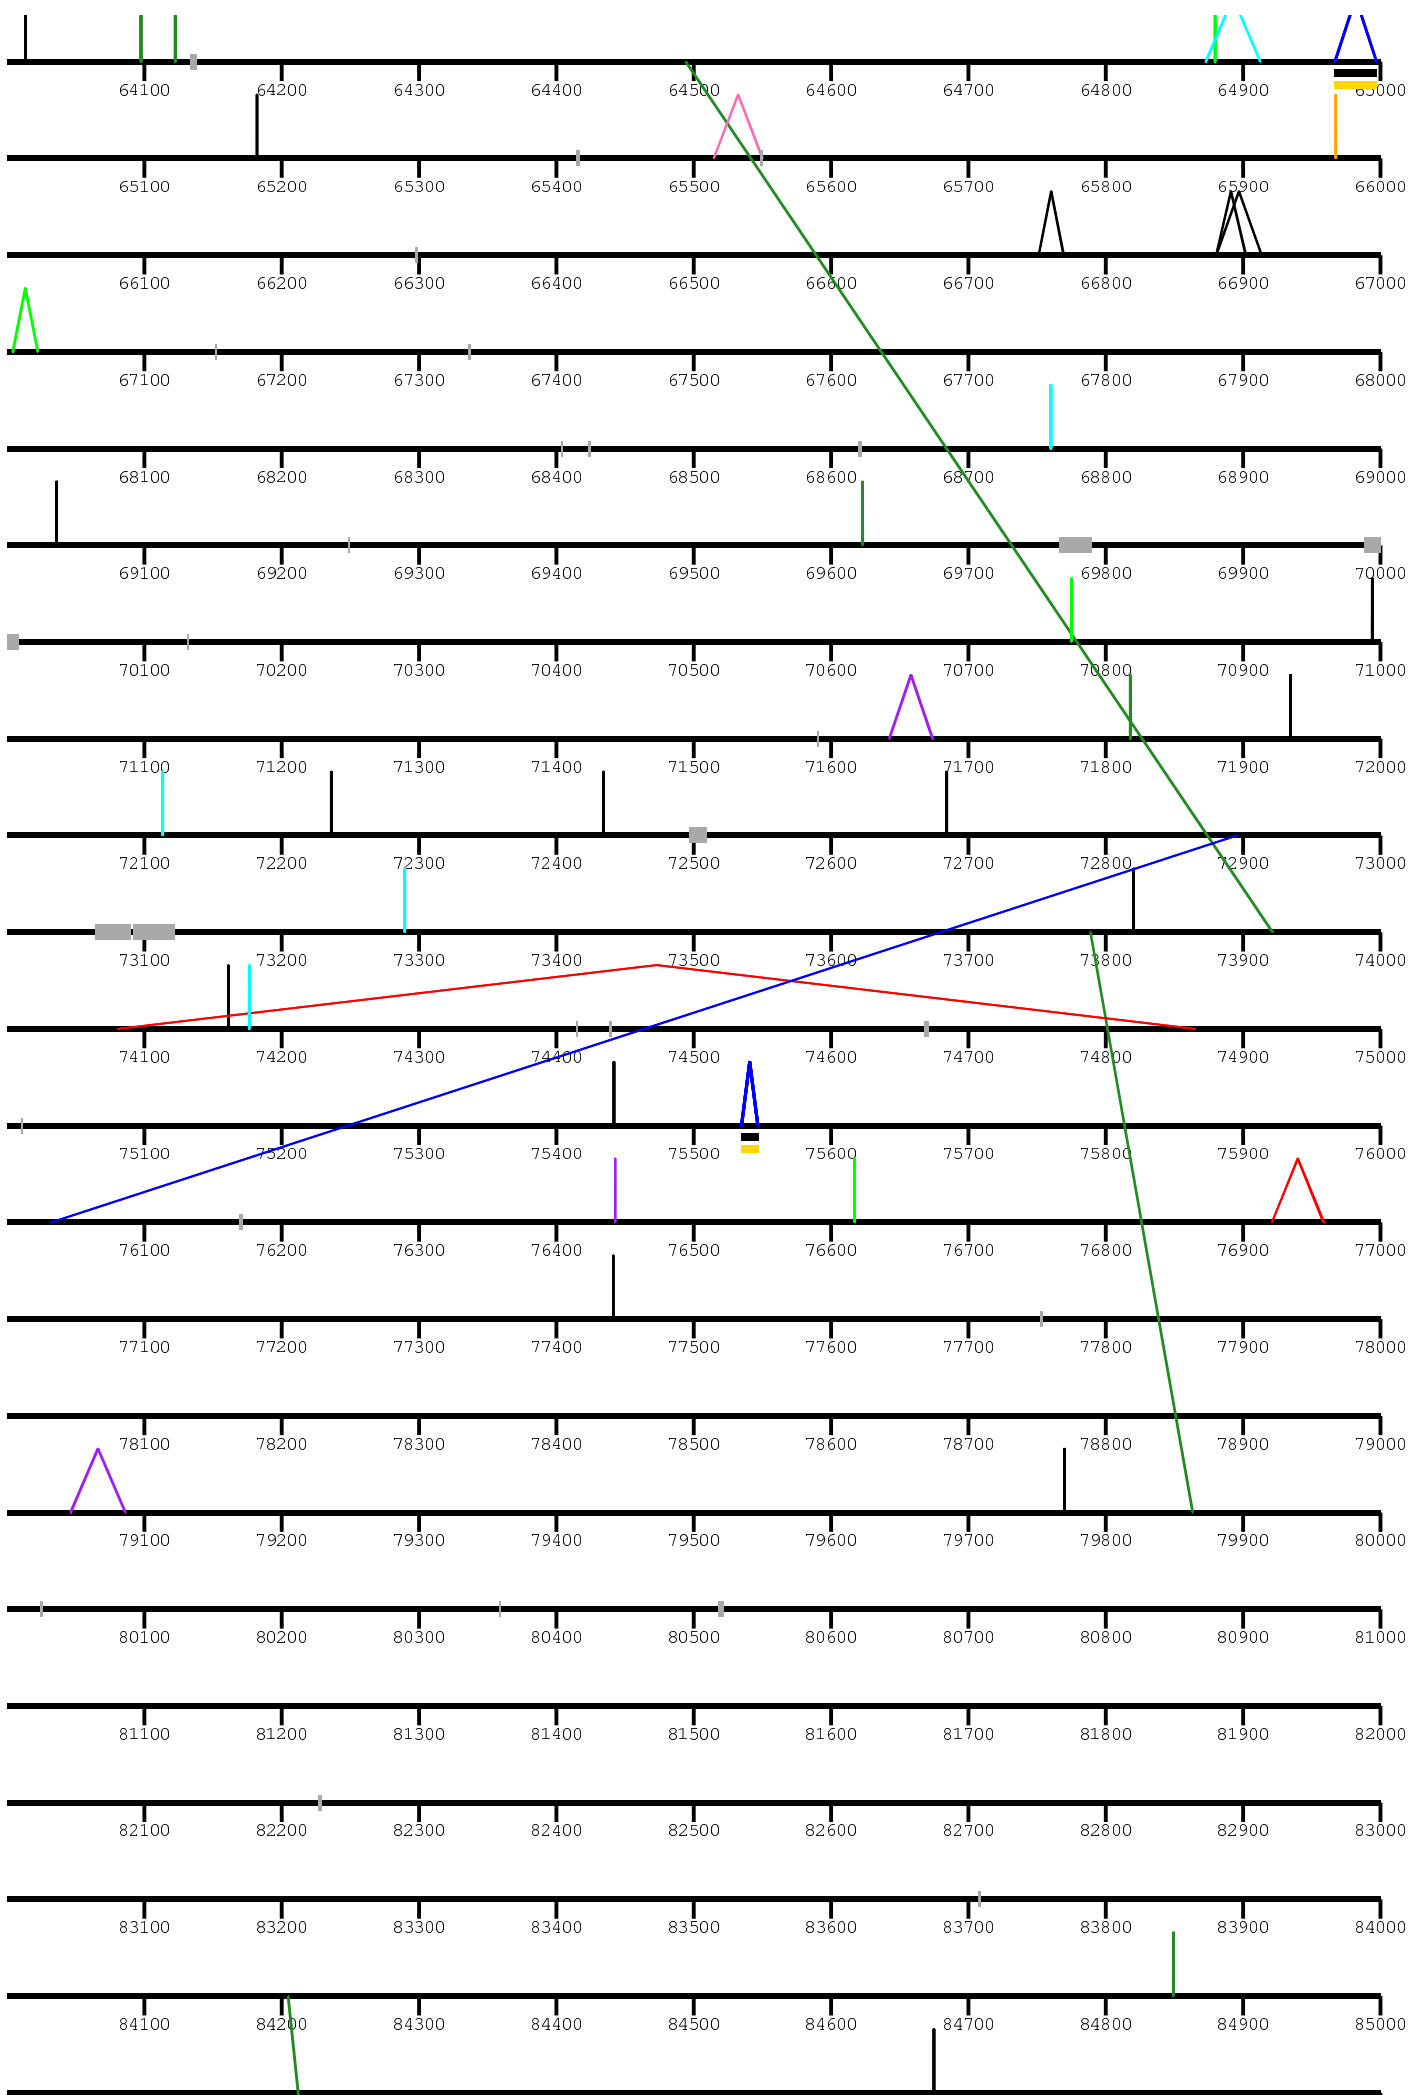

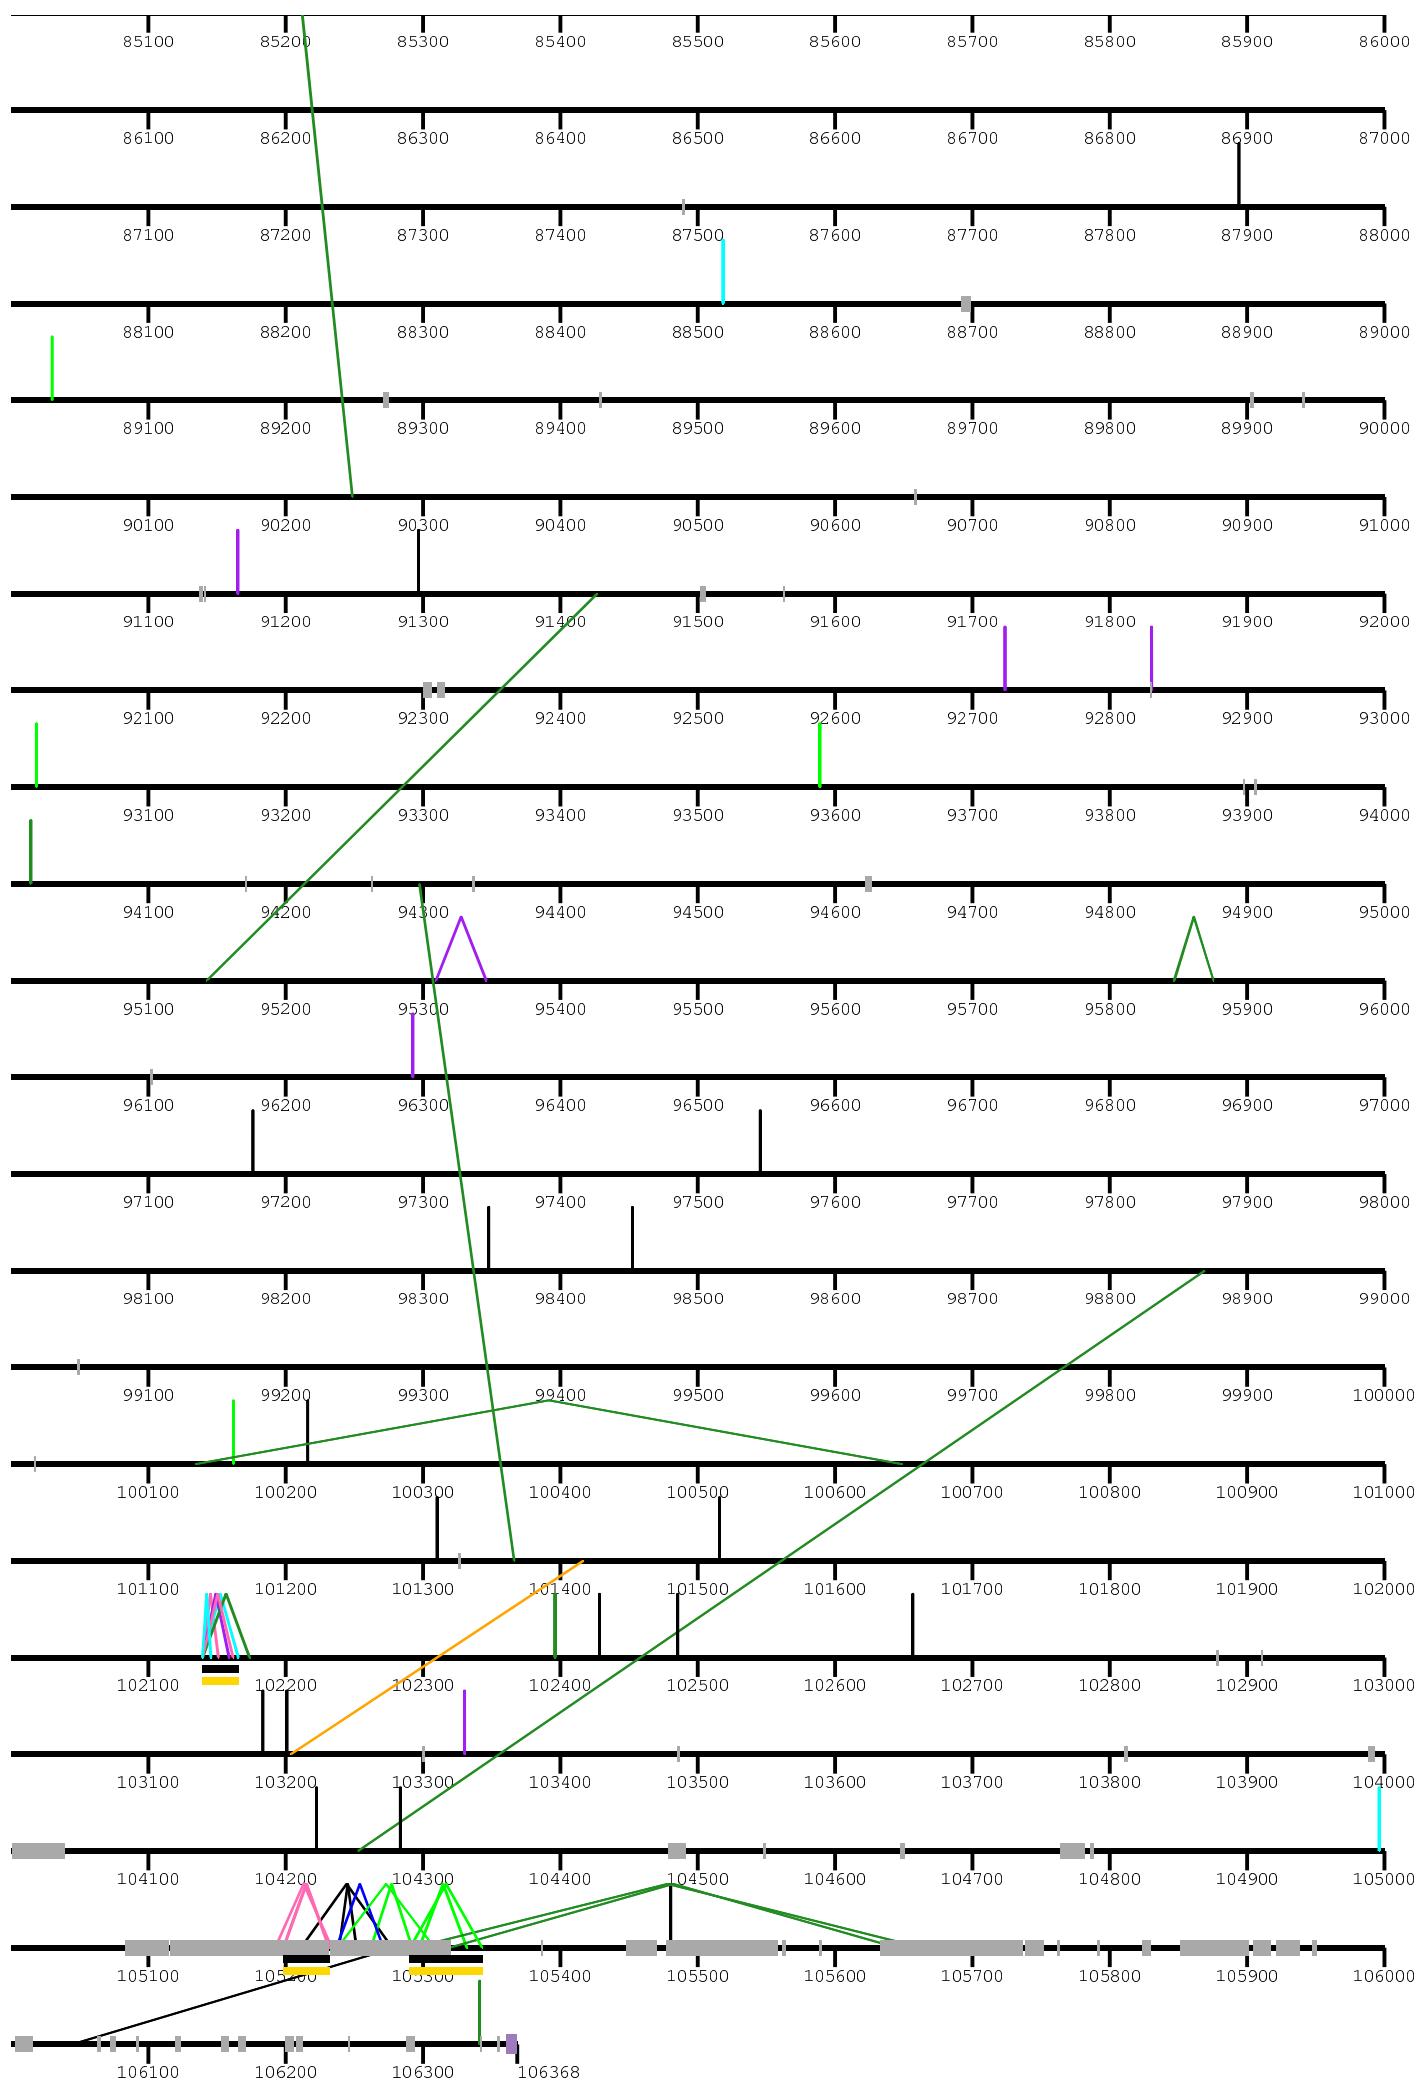

chr15

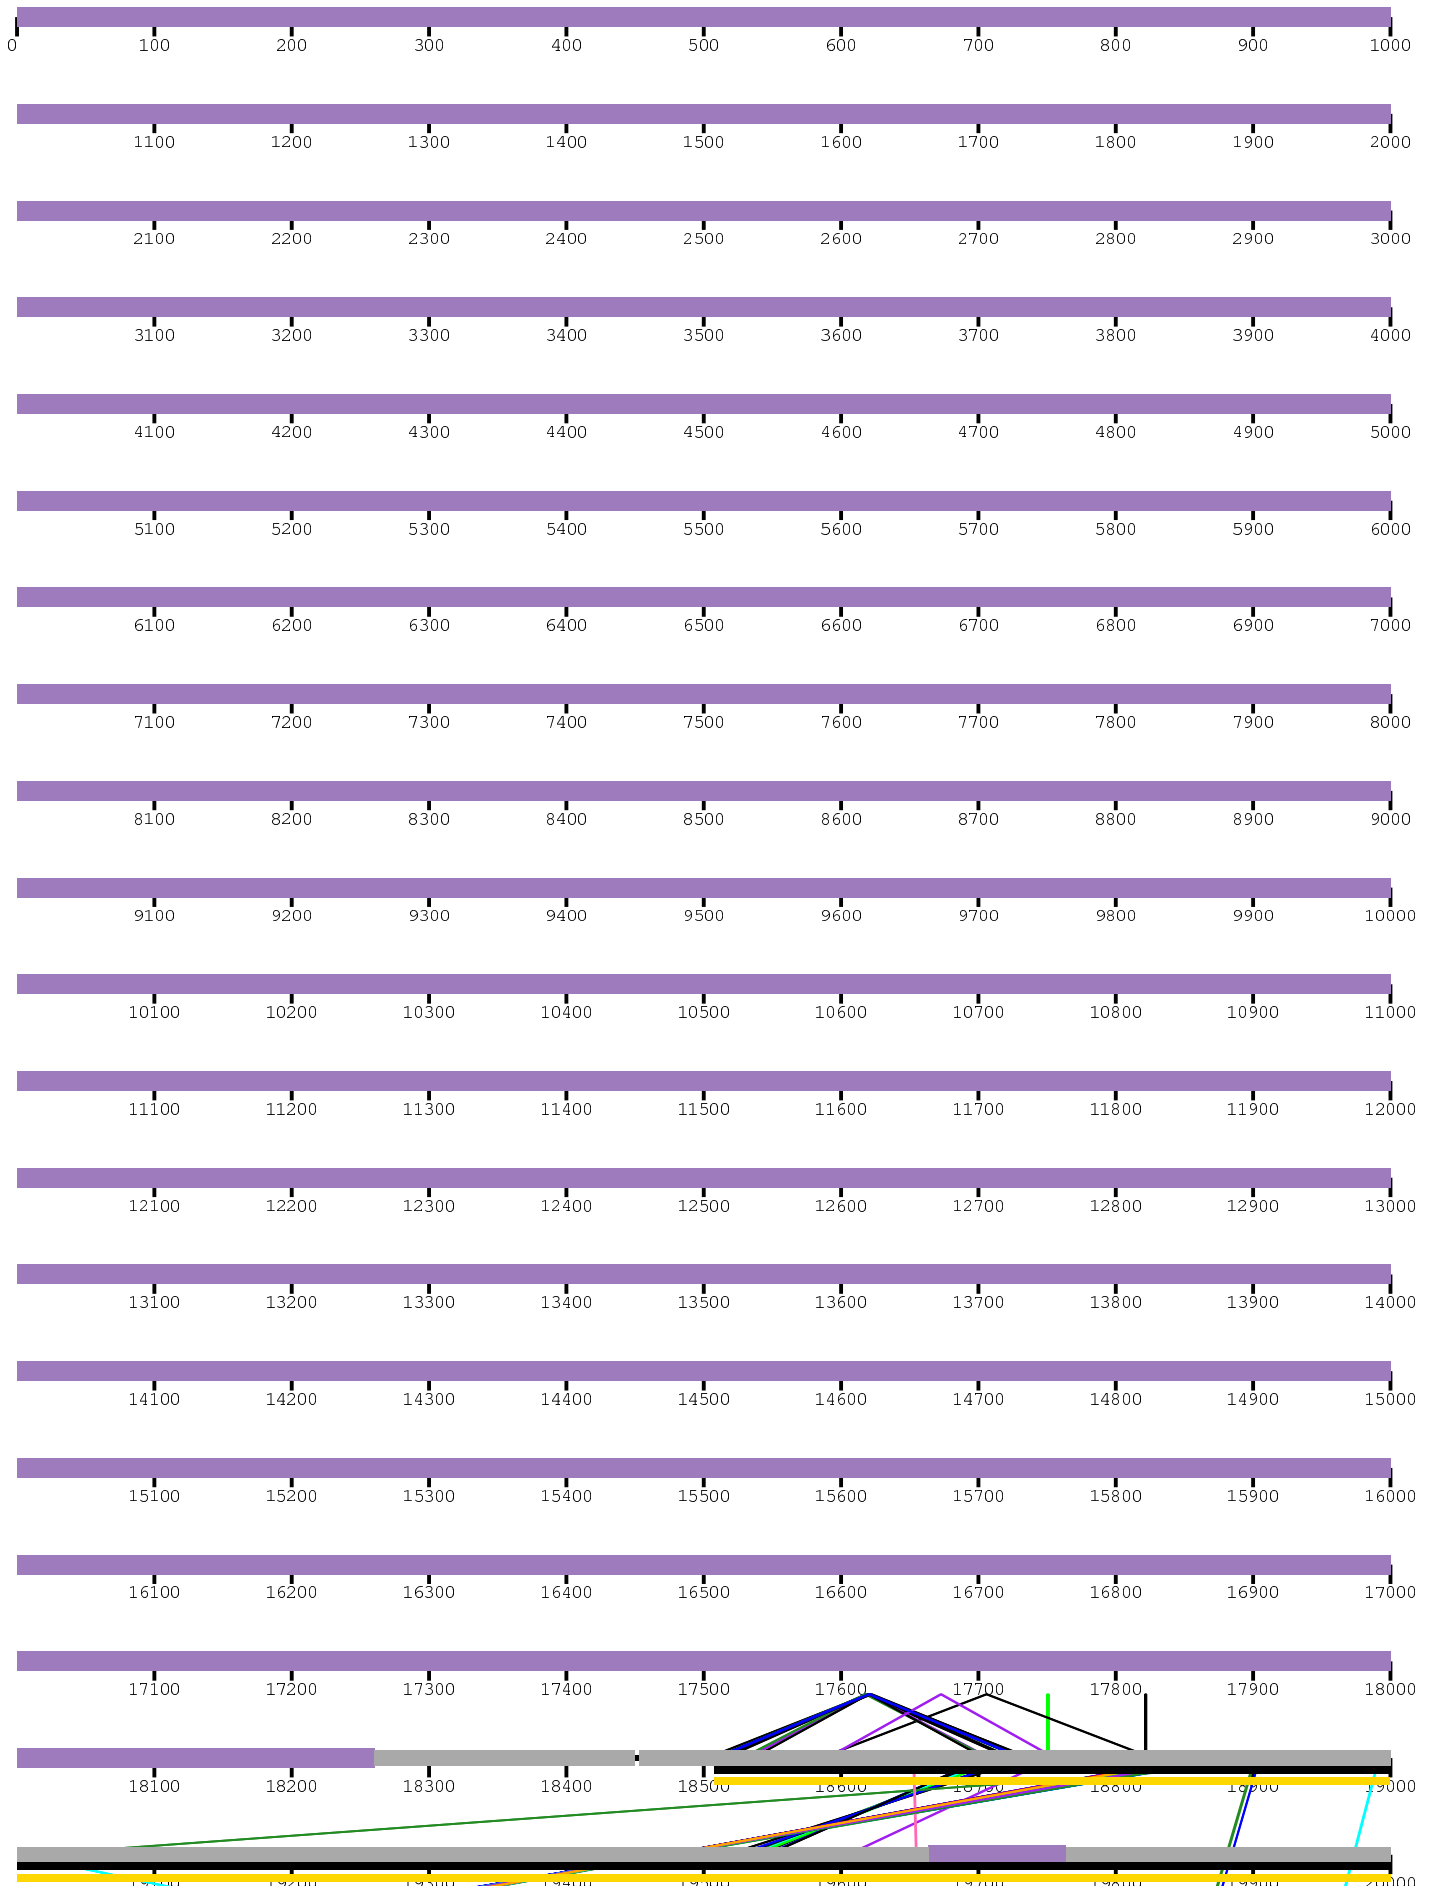

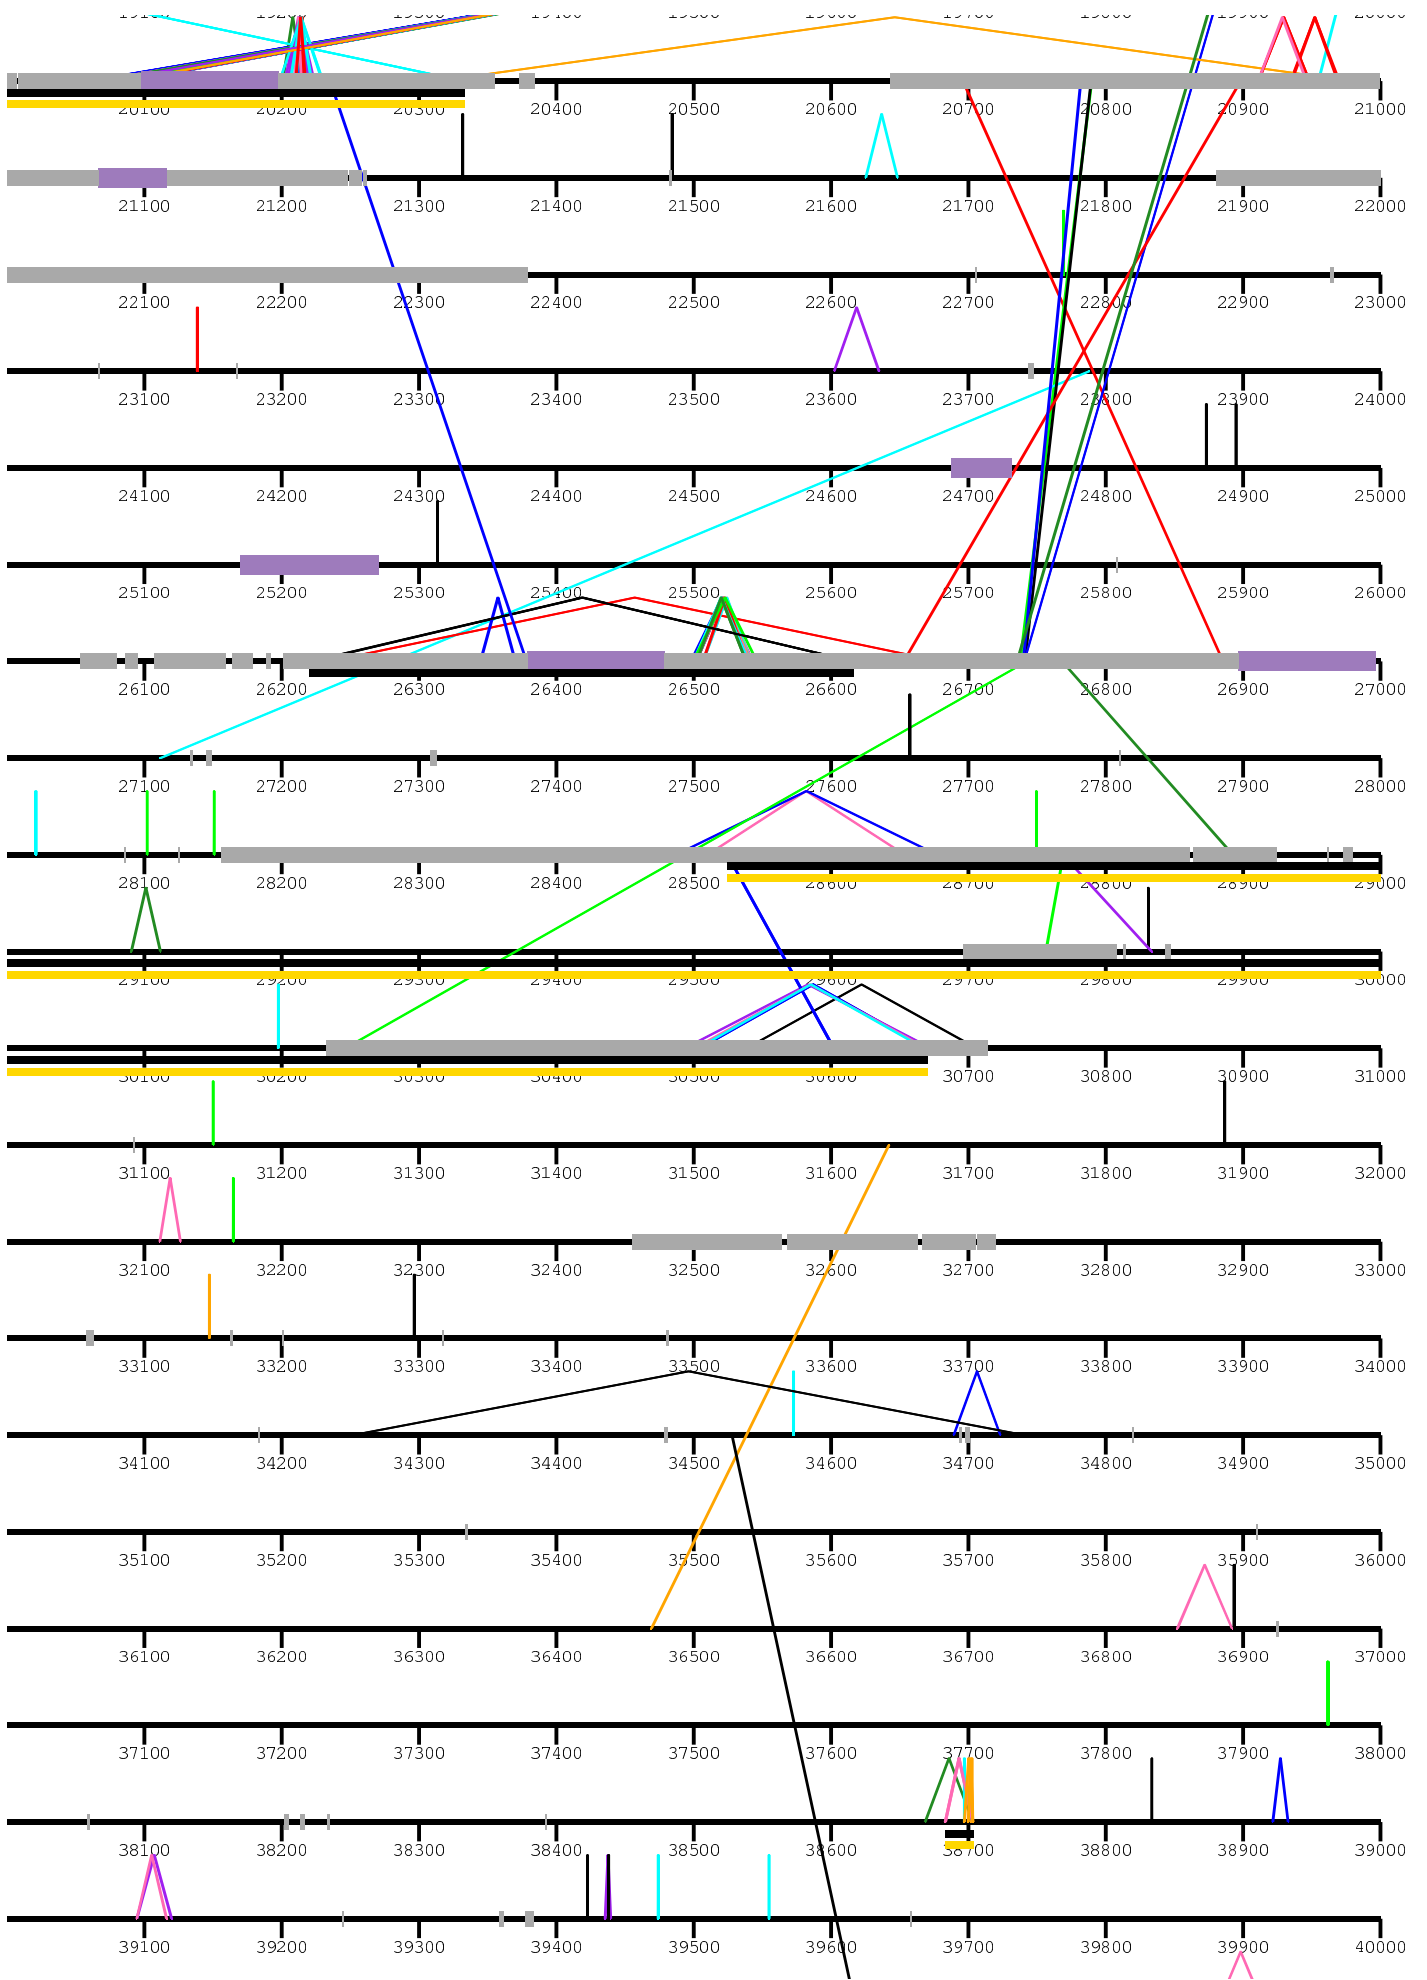

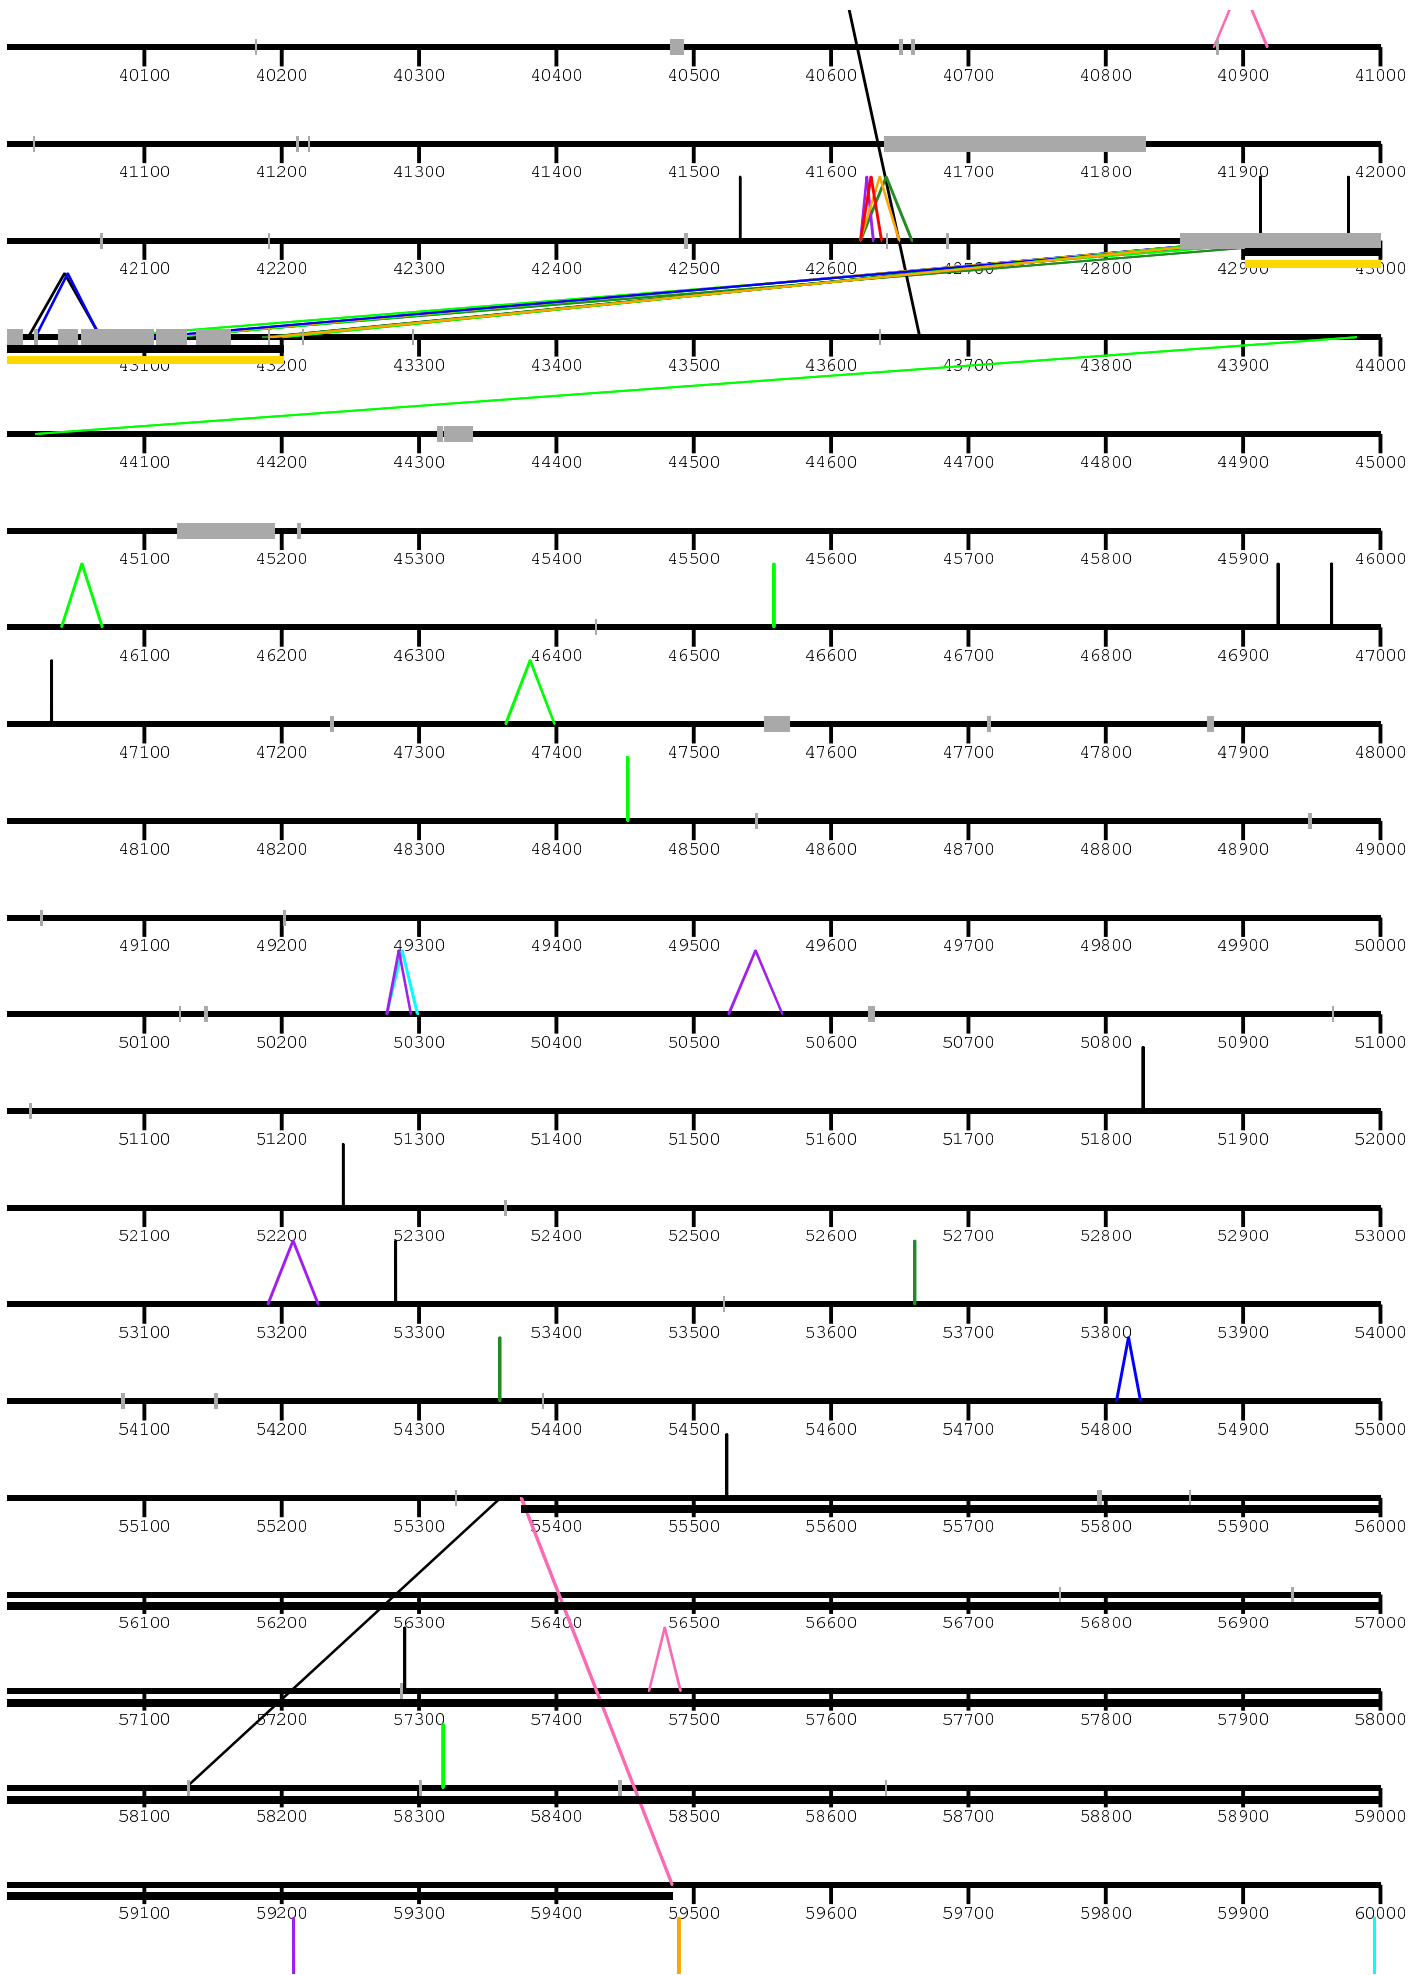

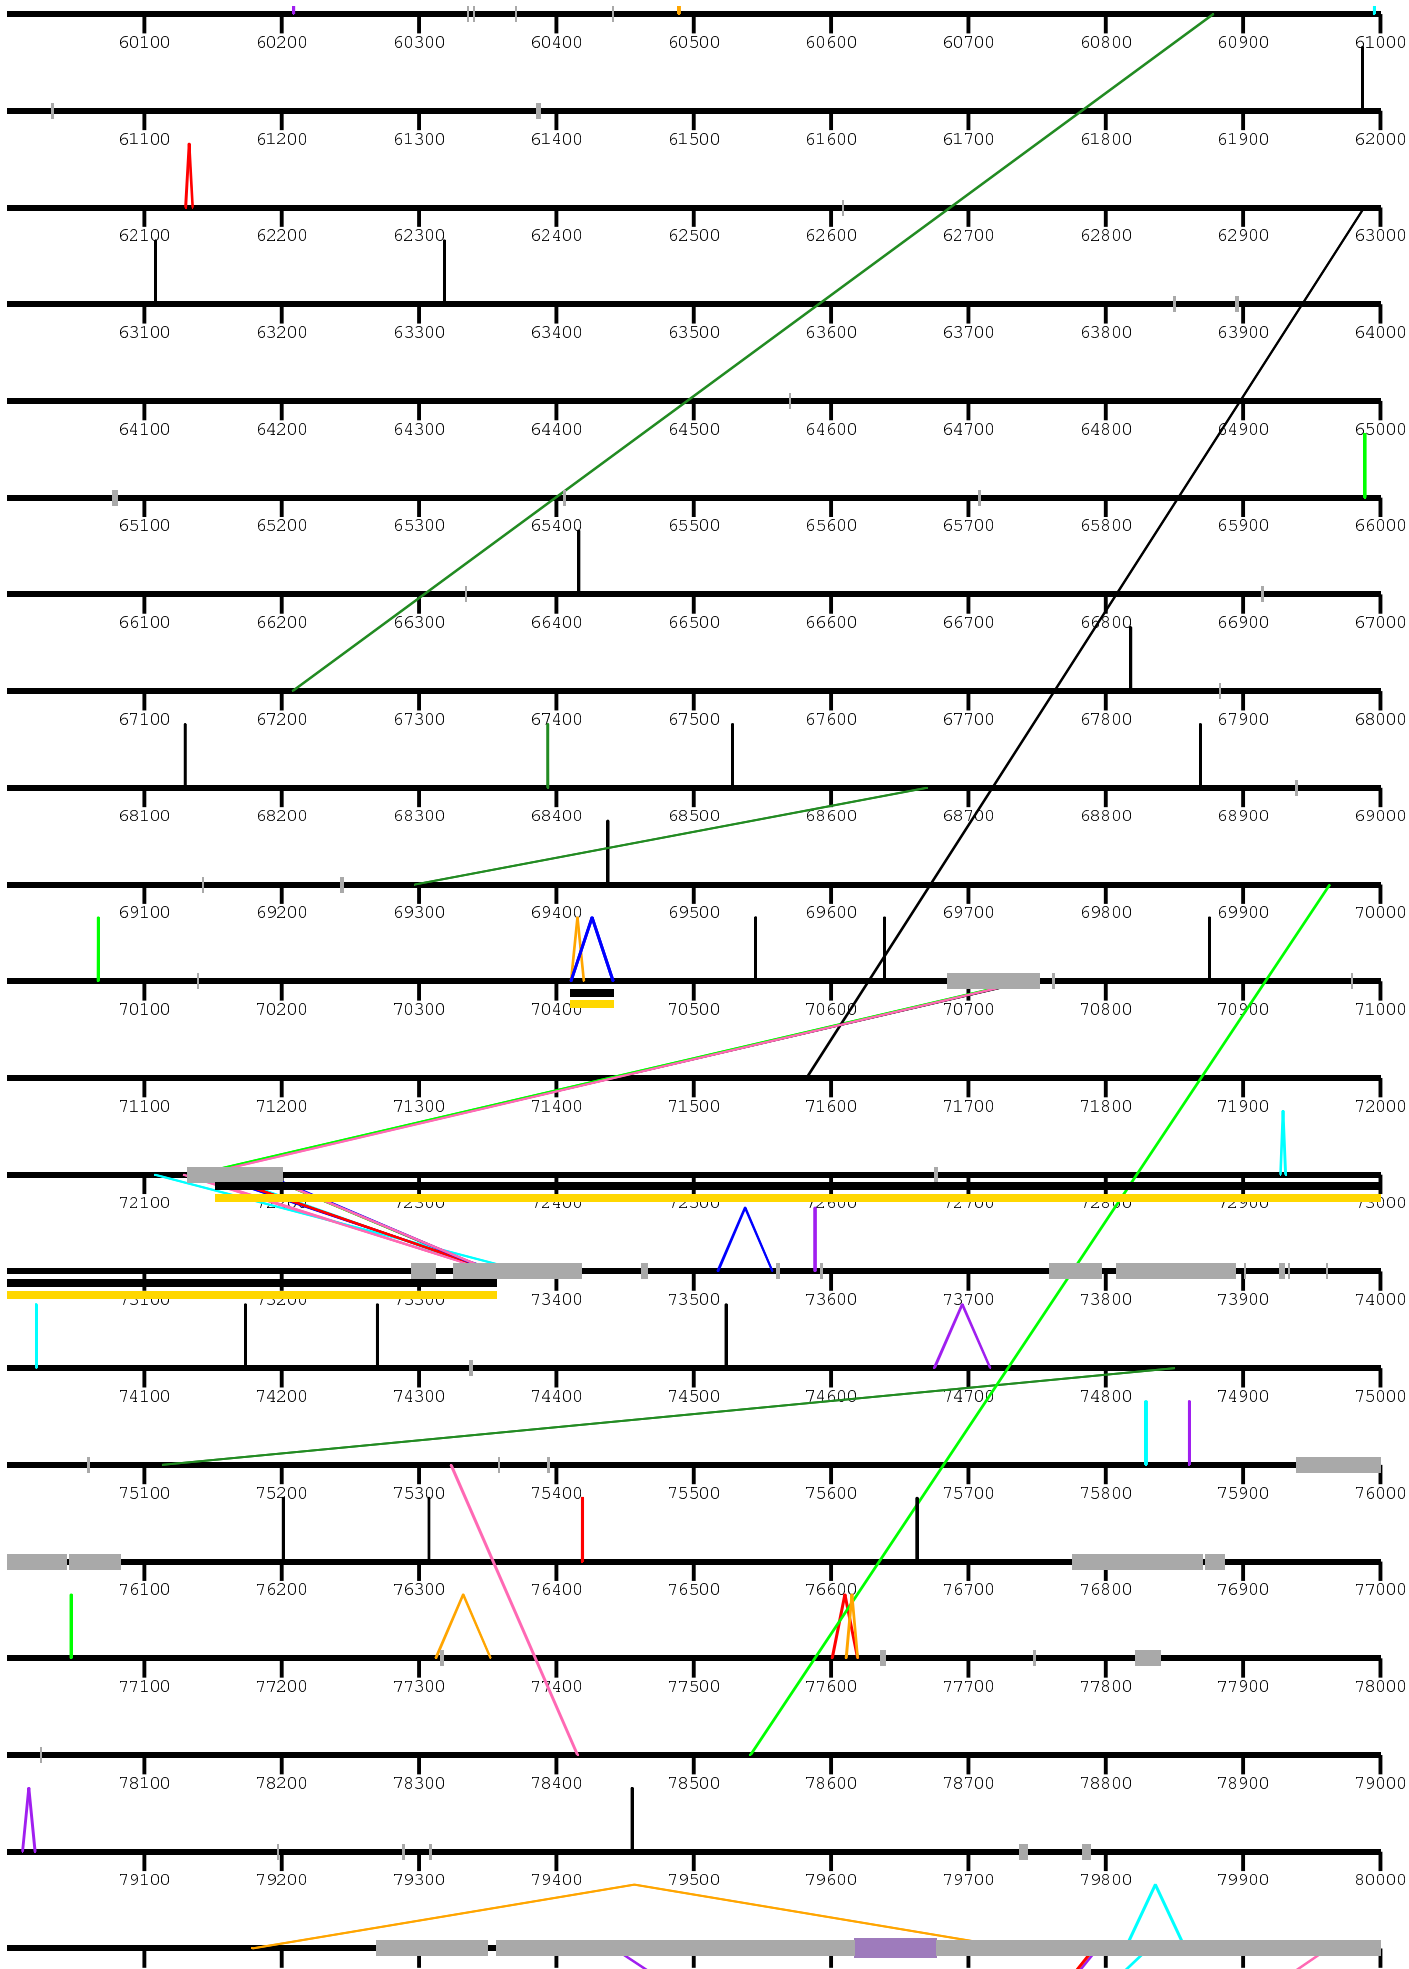

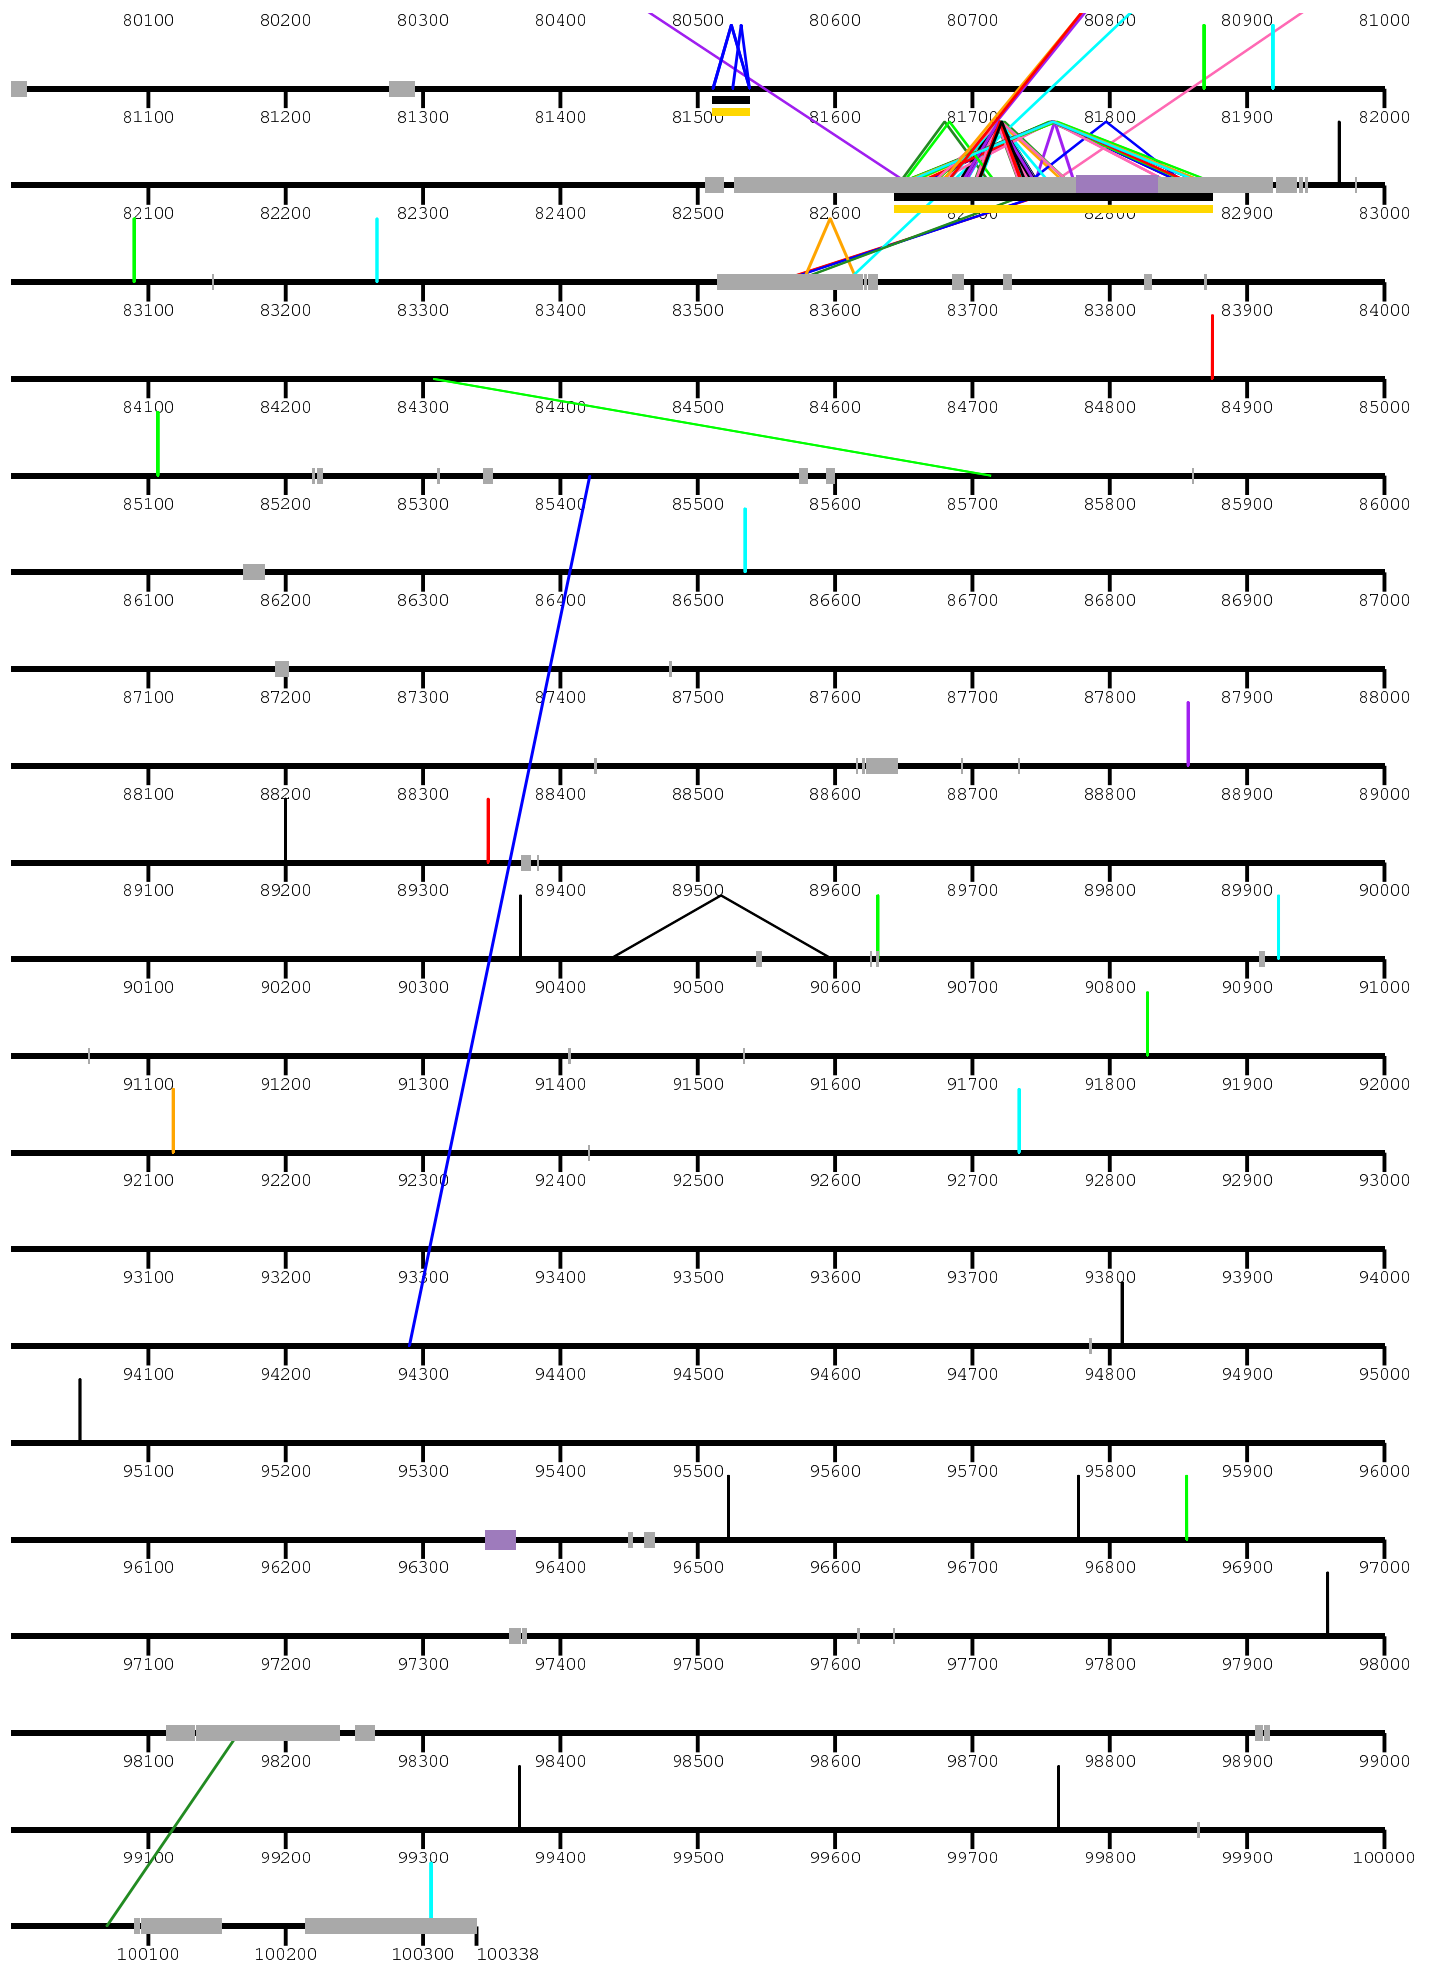

chr16

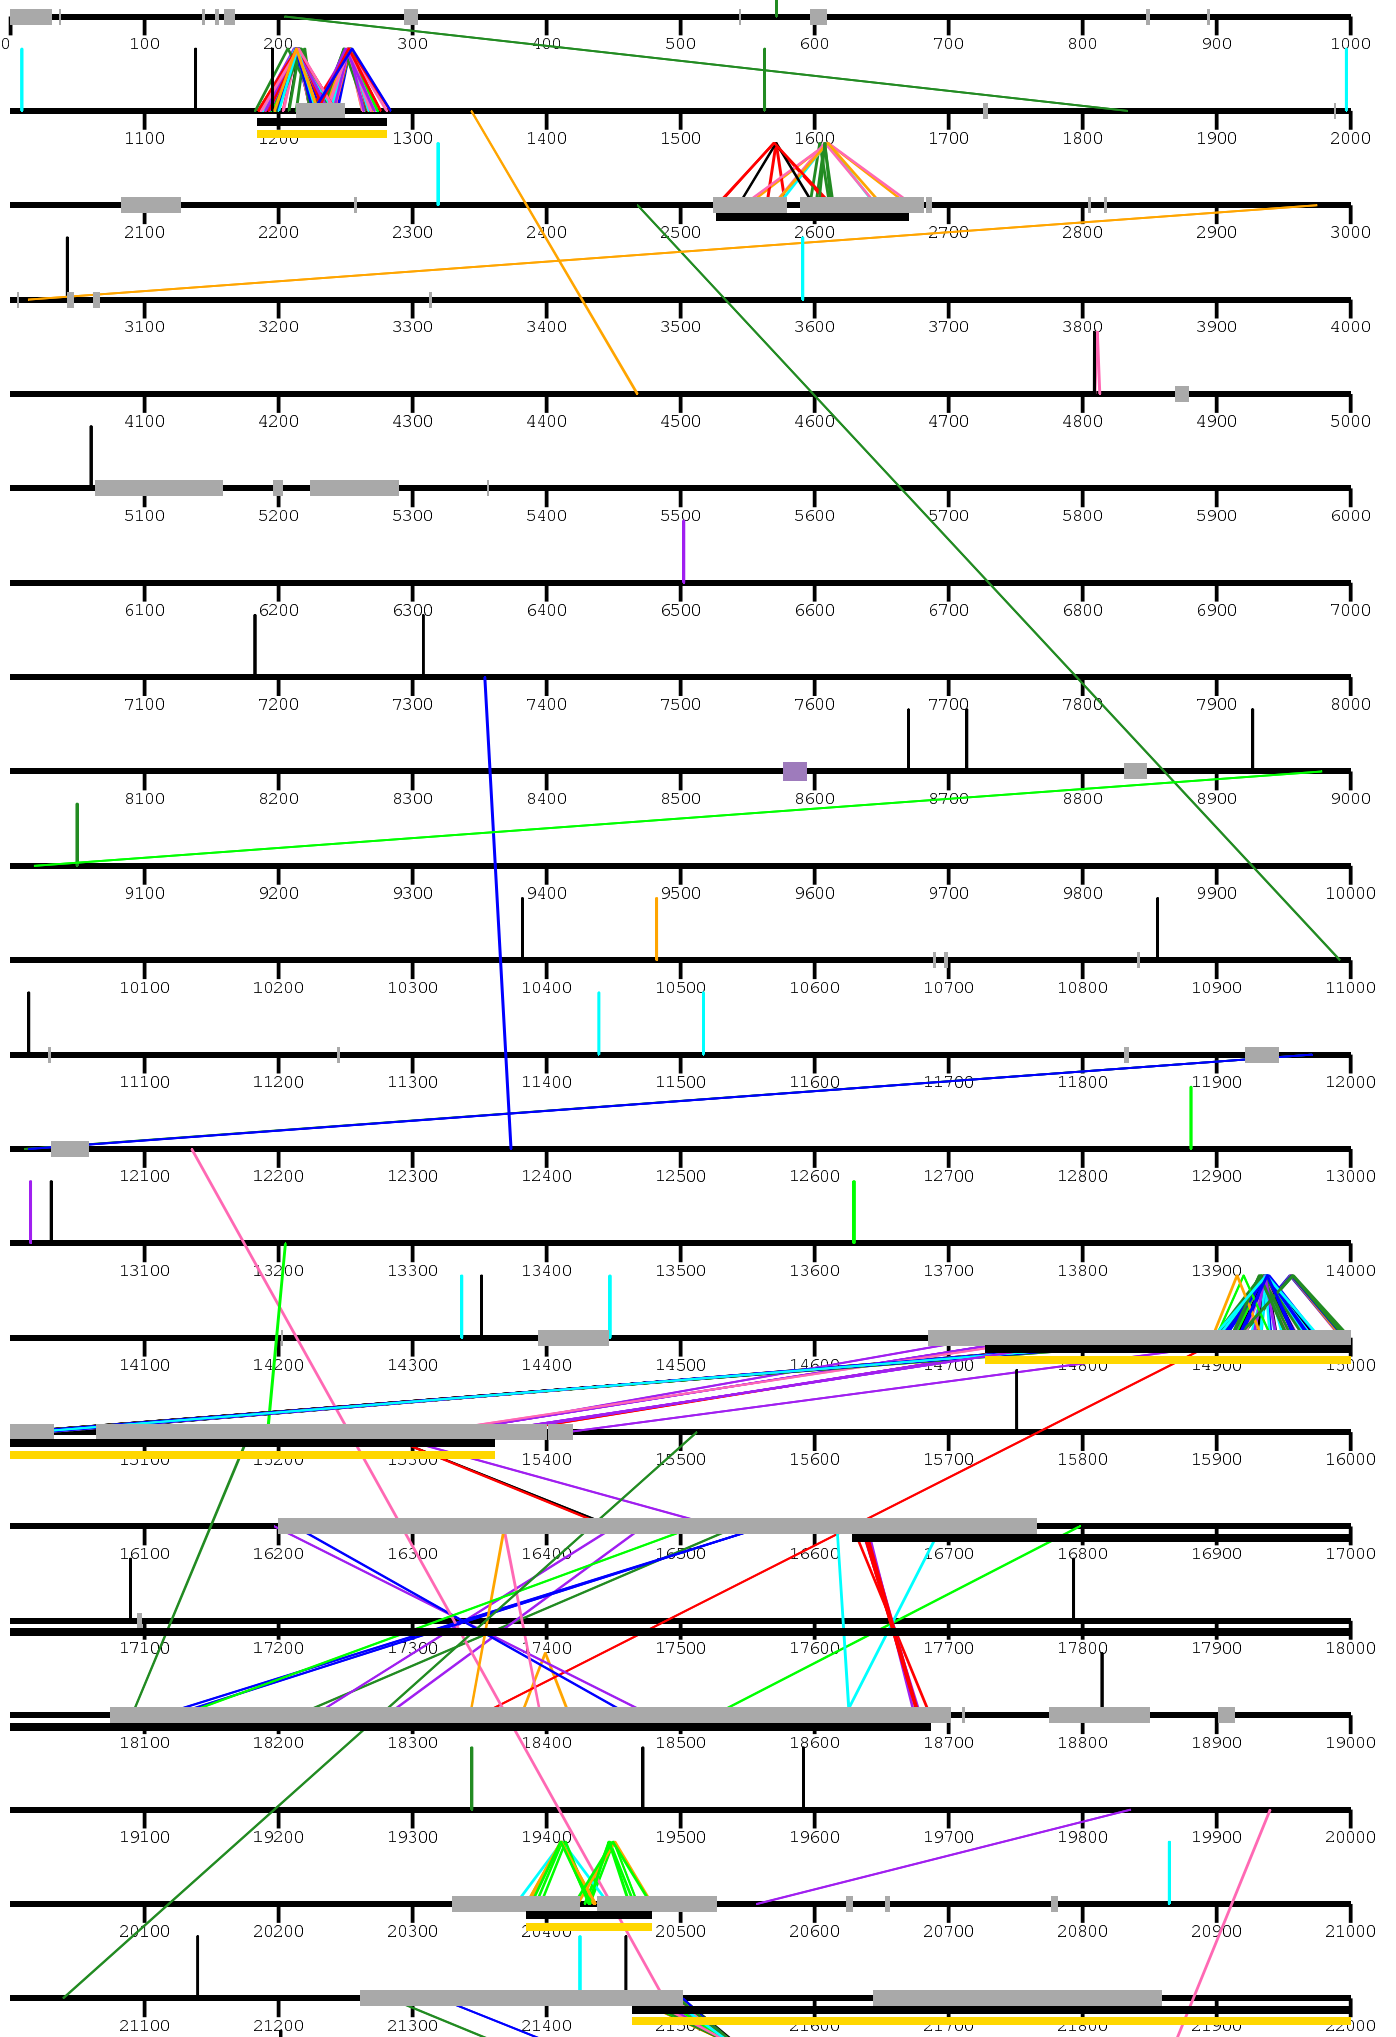



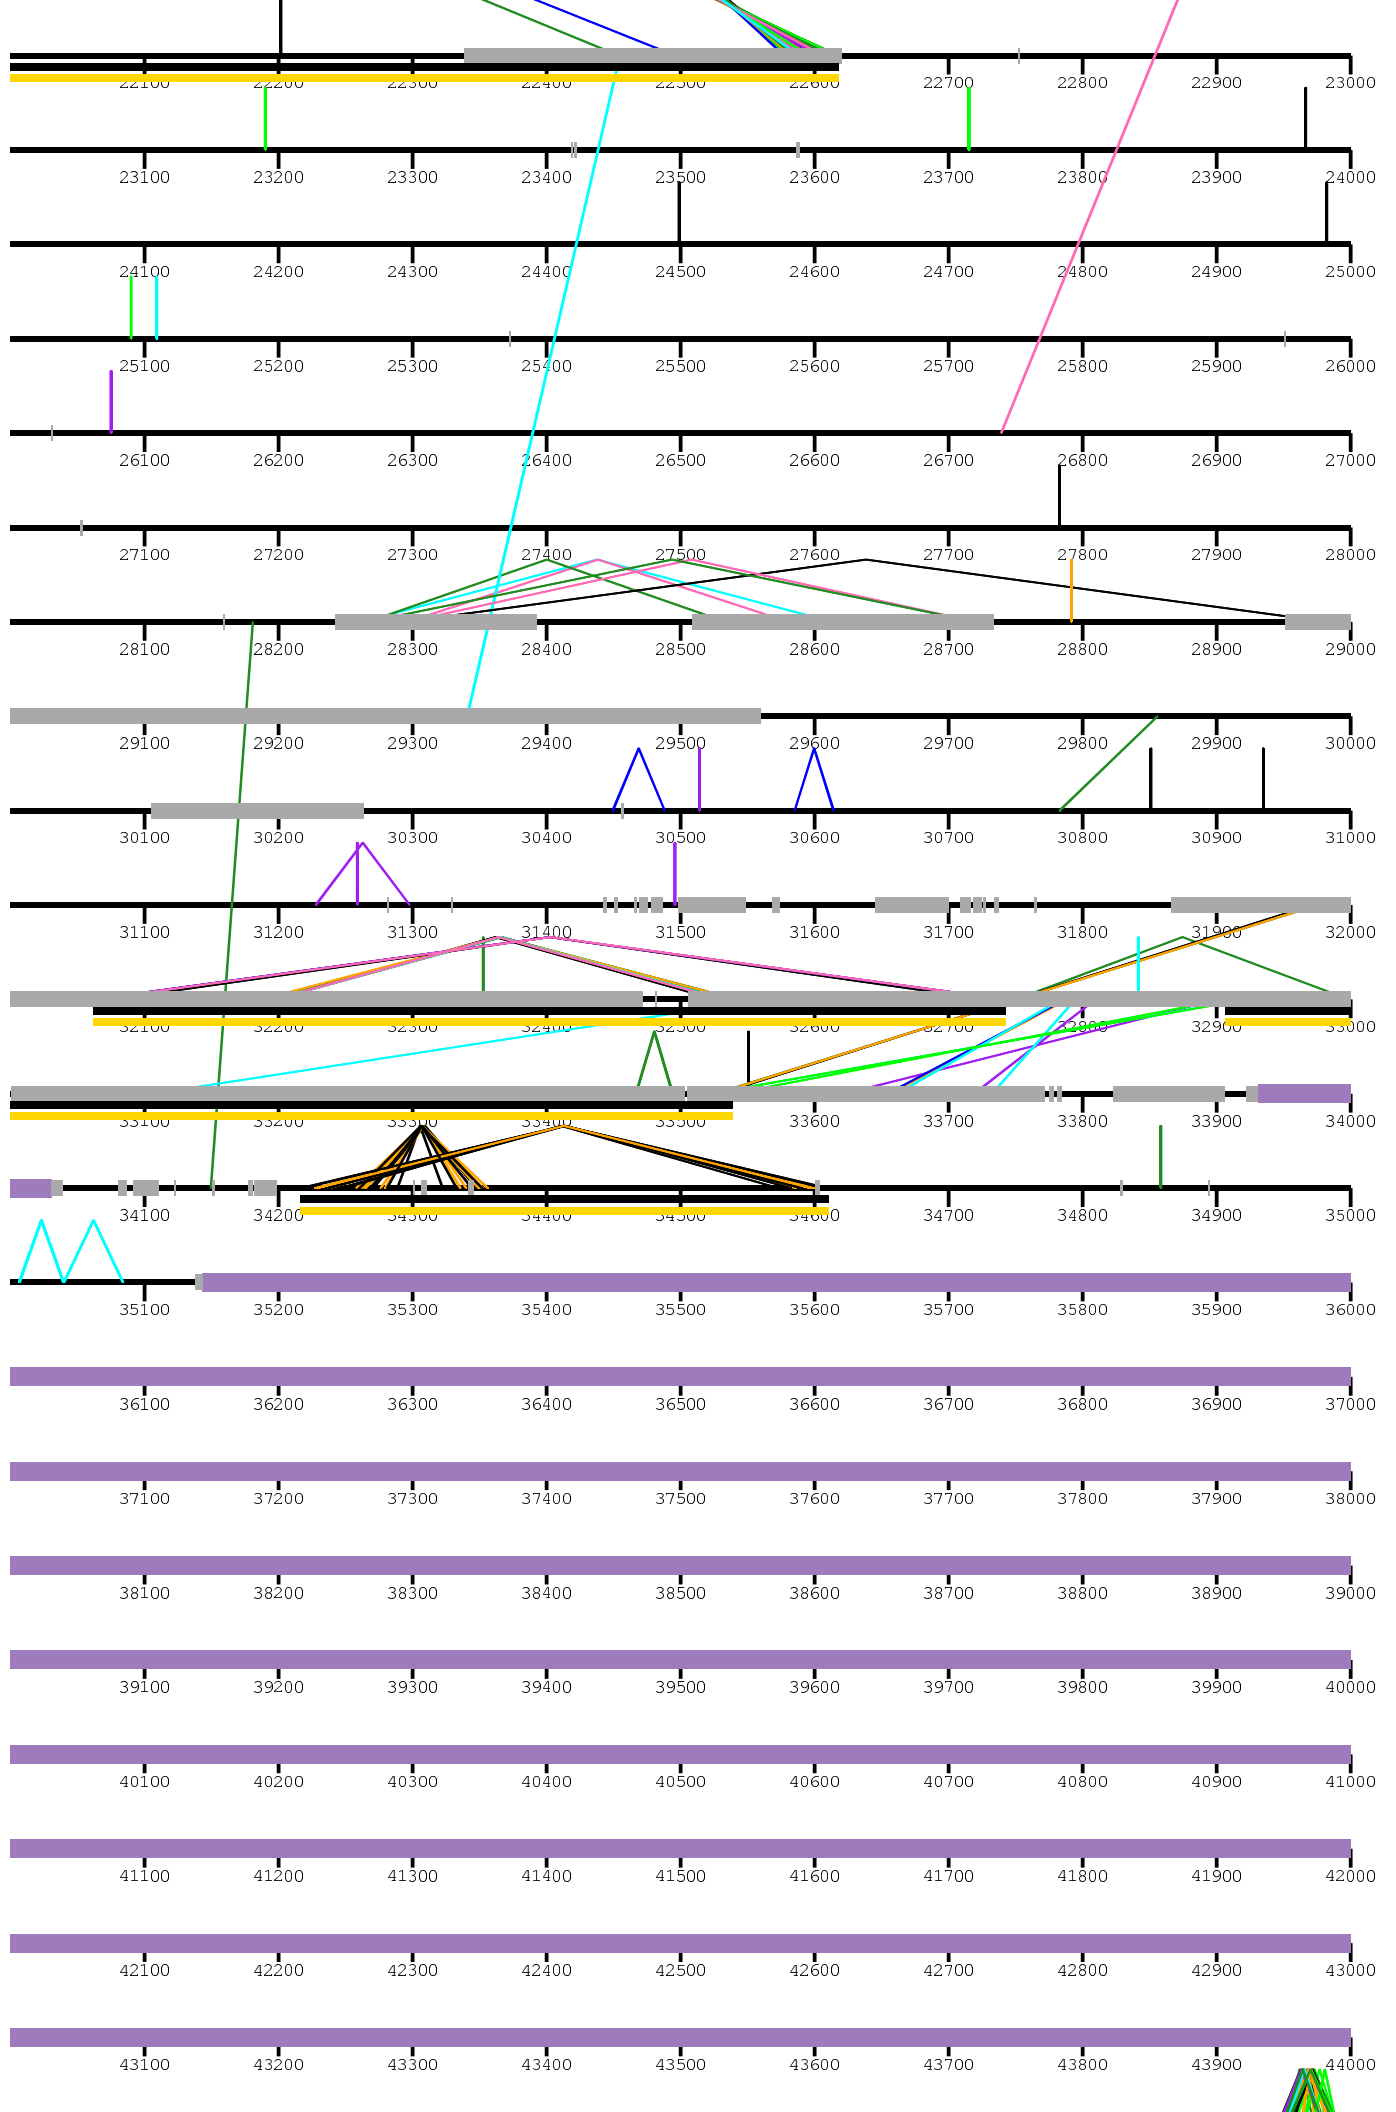

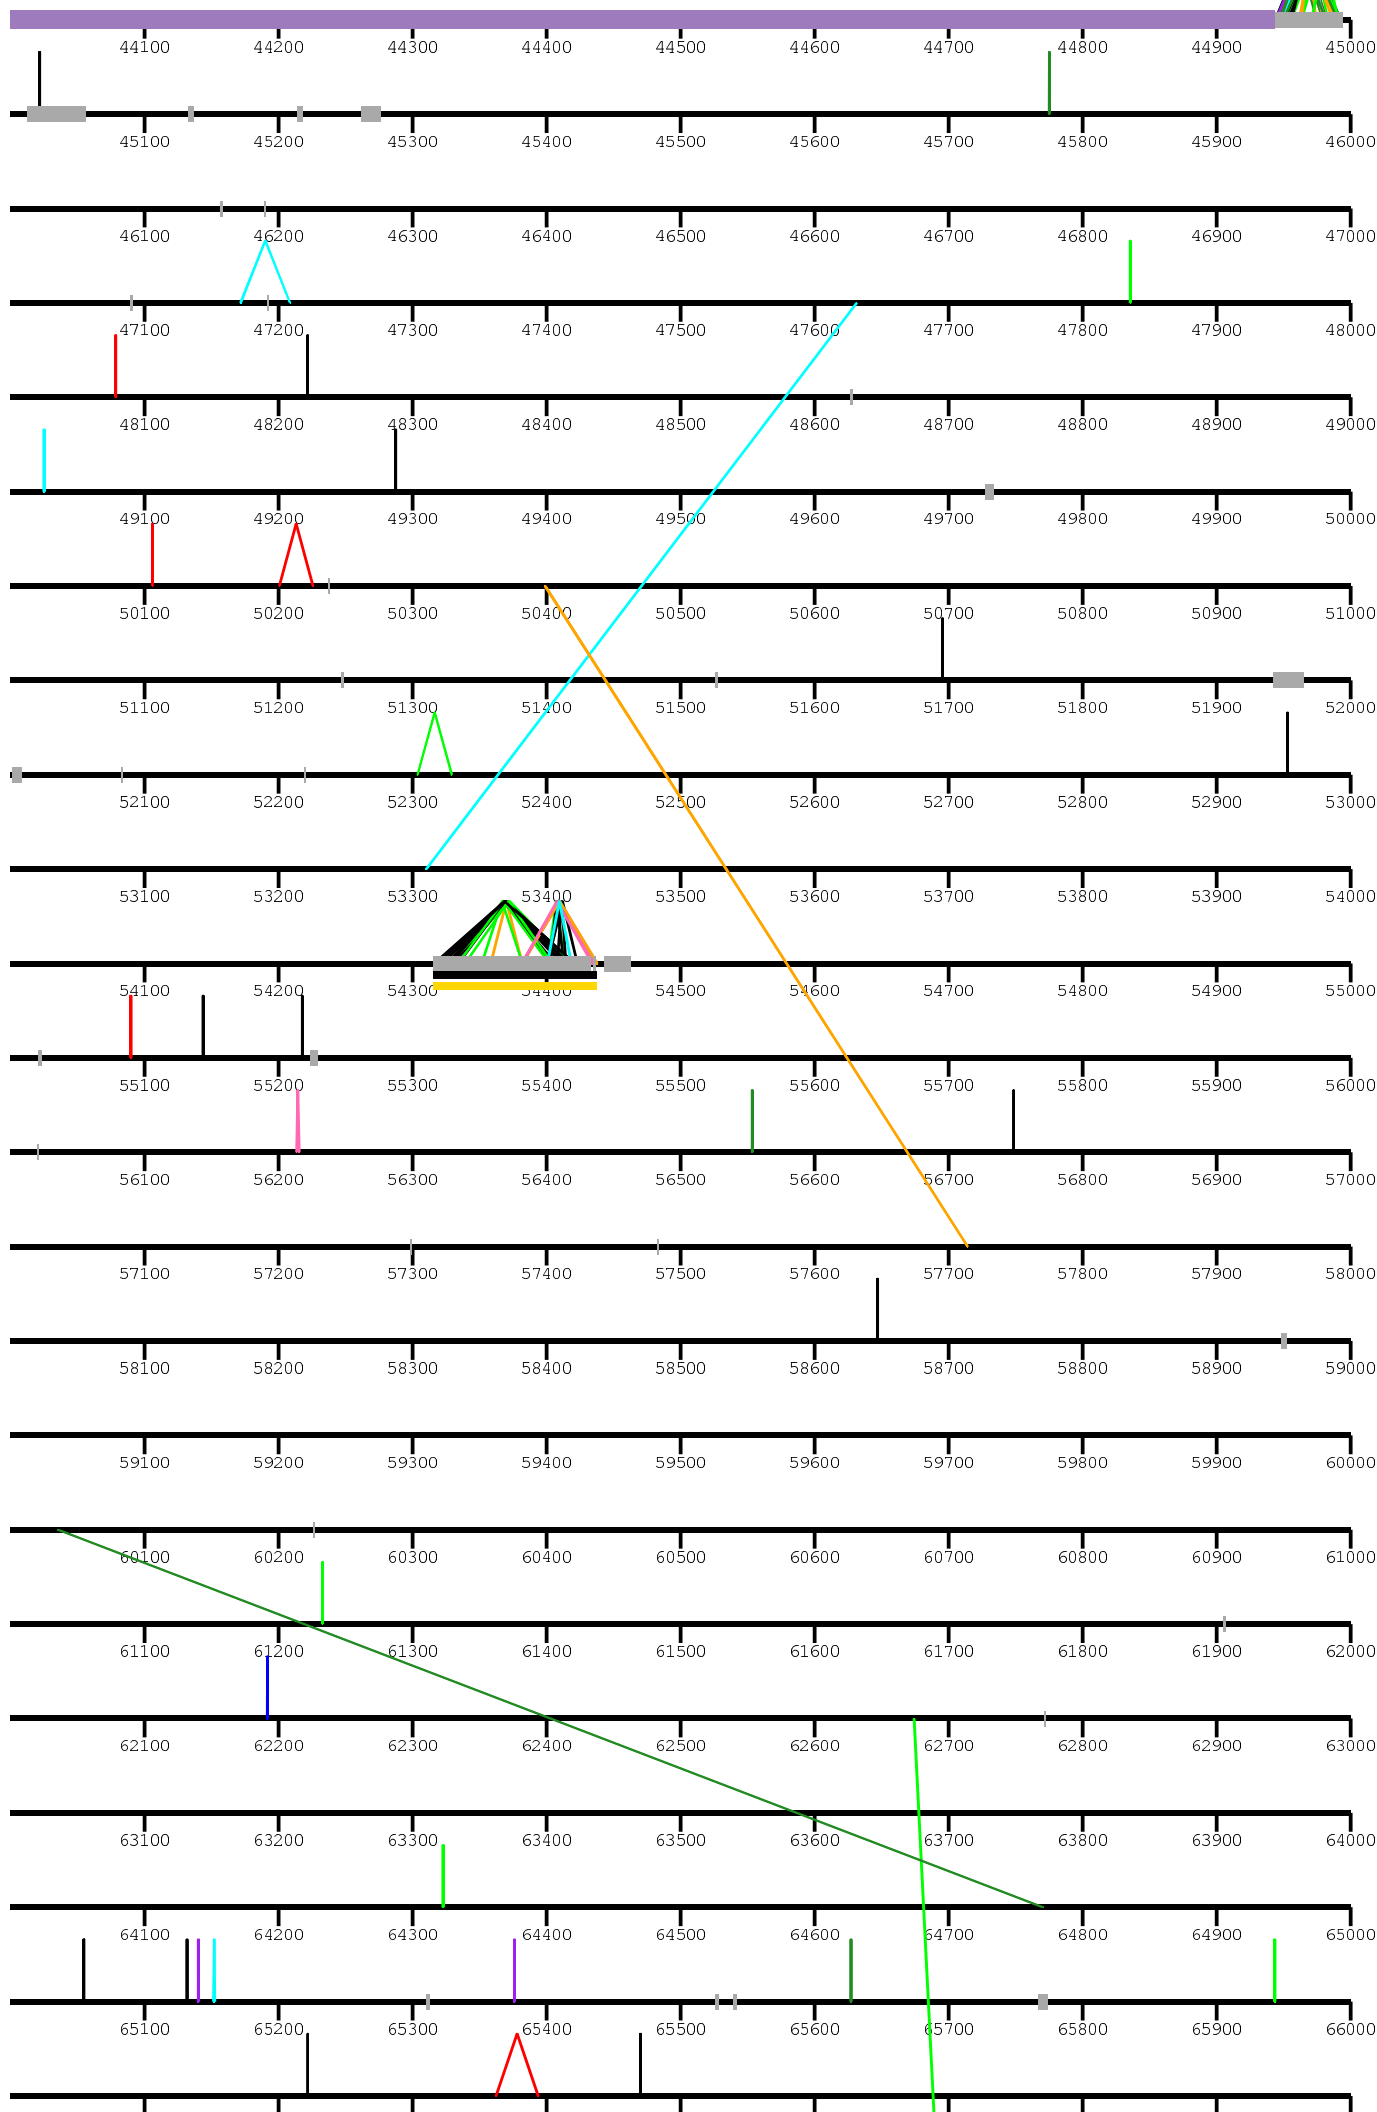

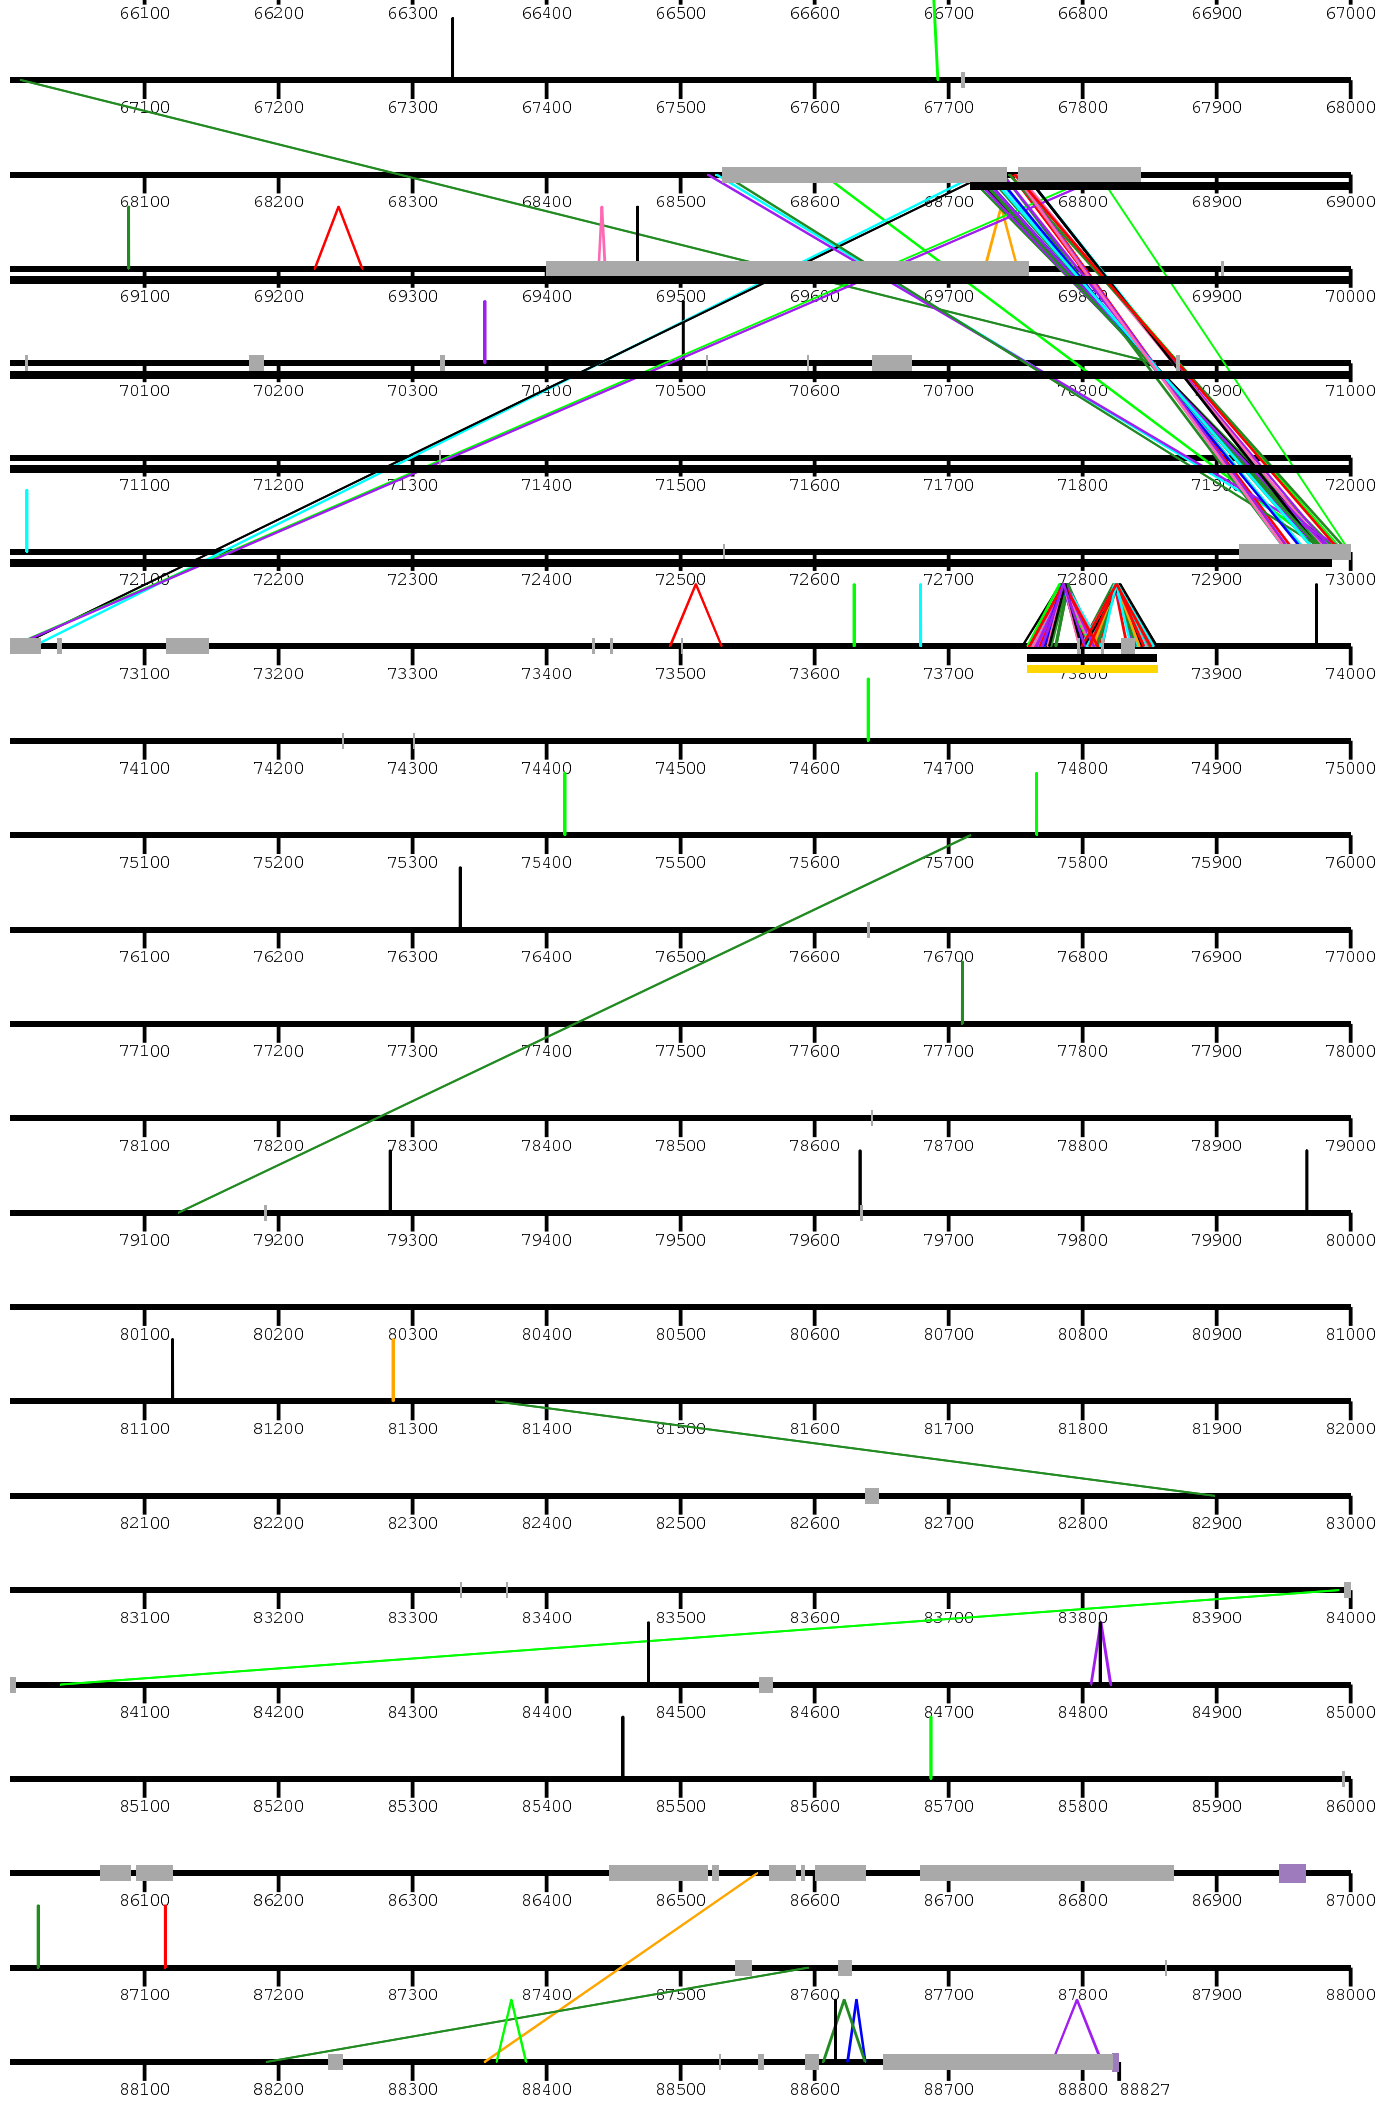

chr17

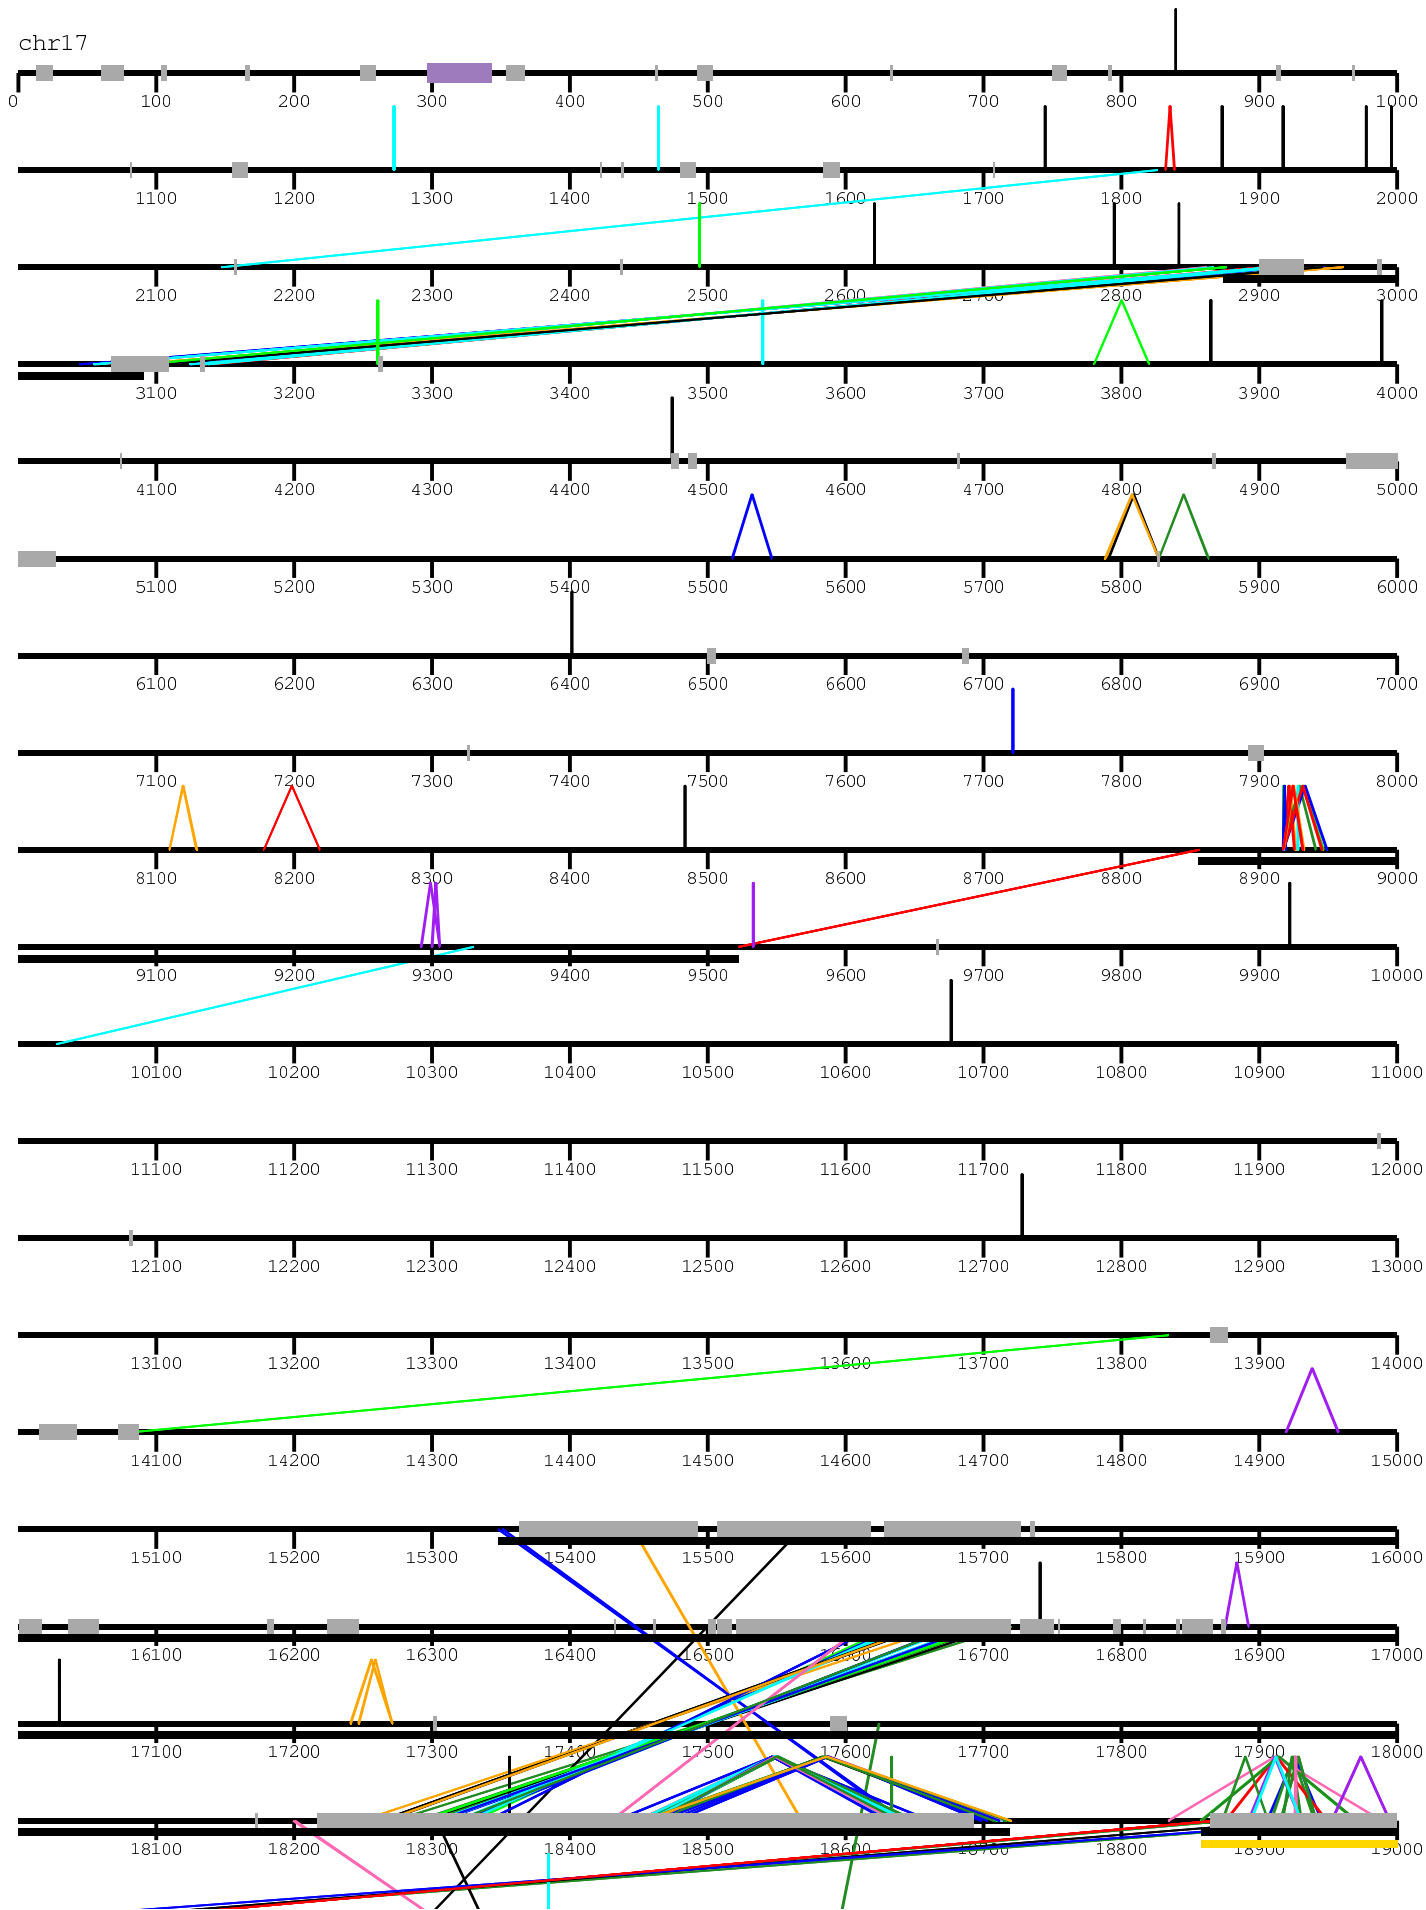

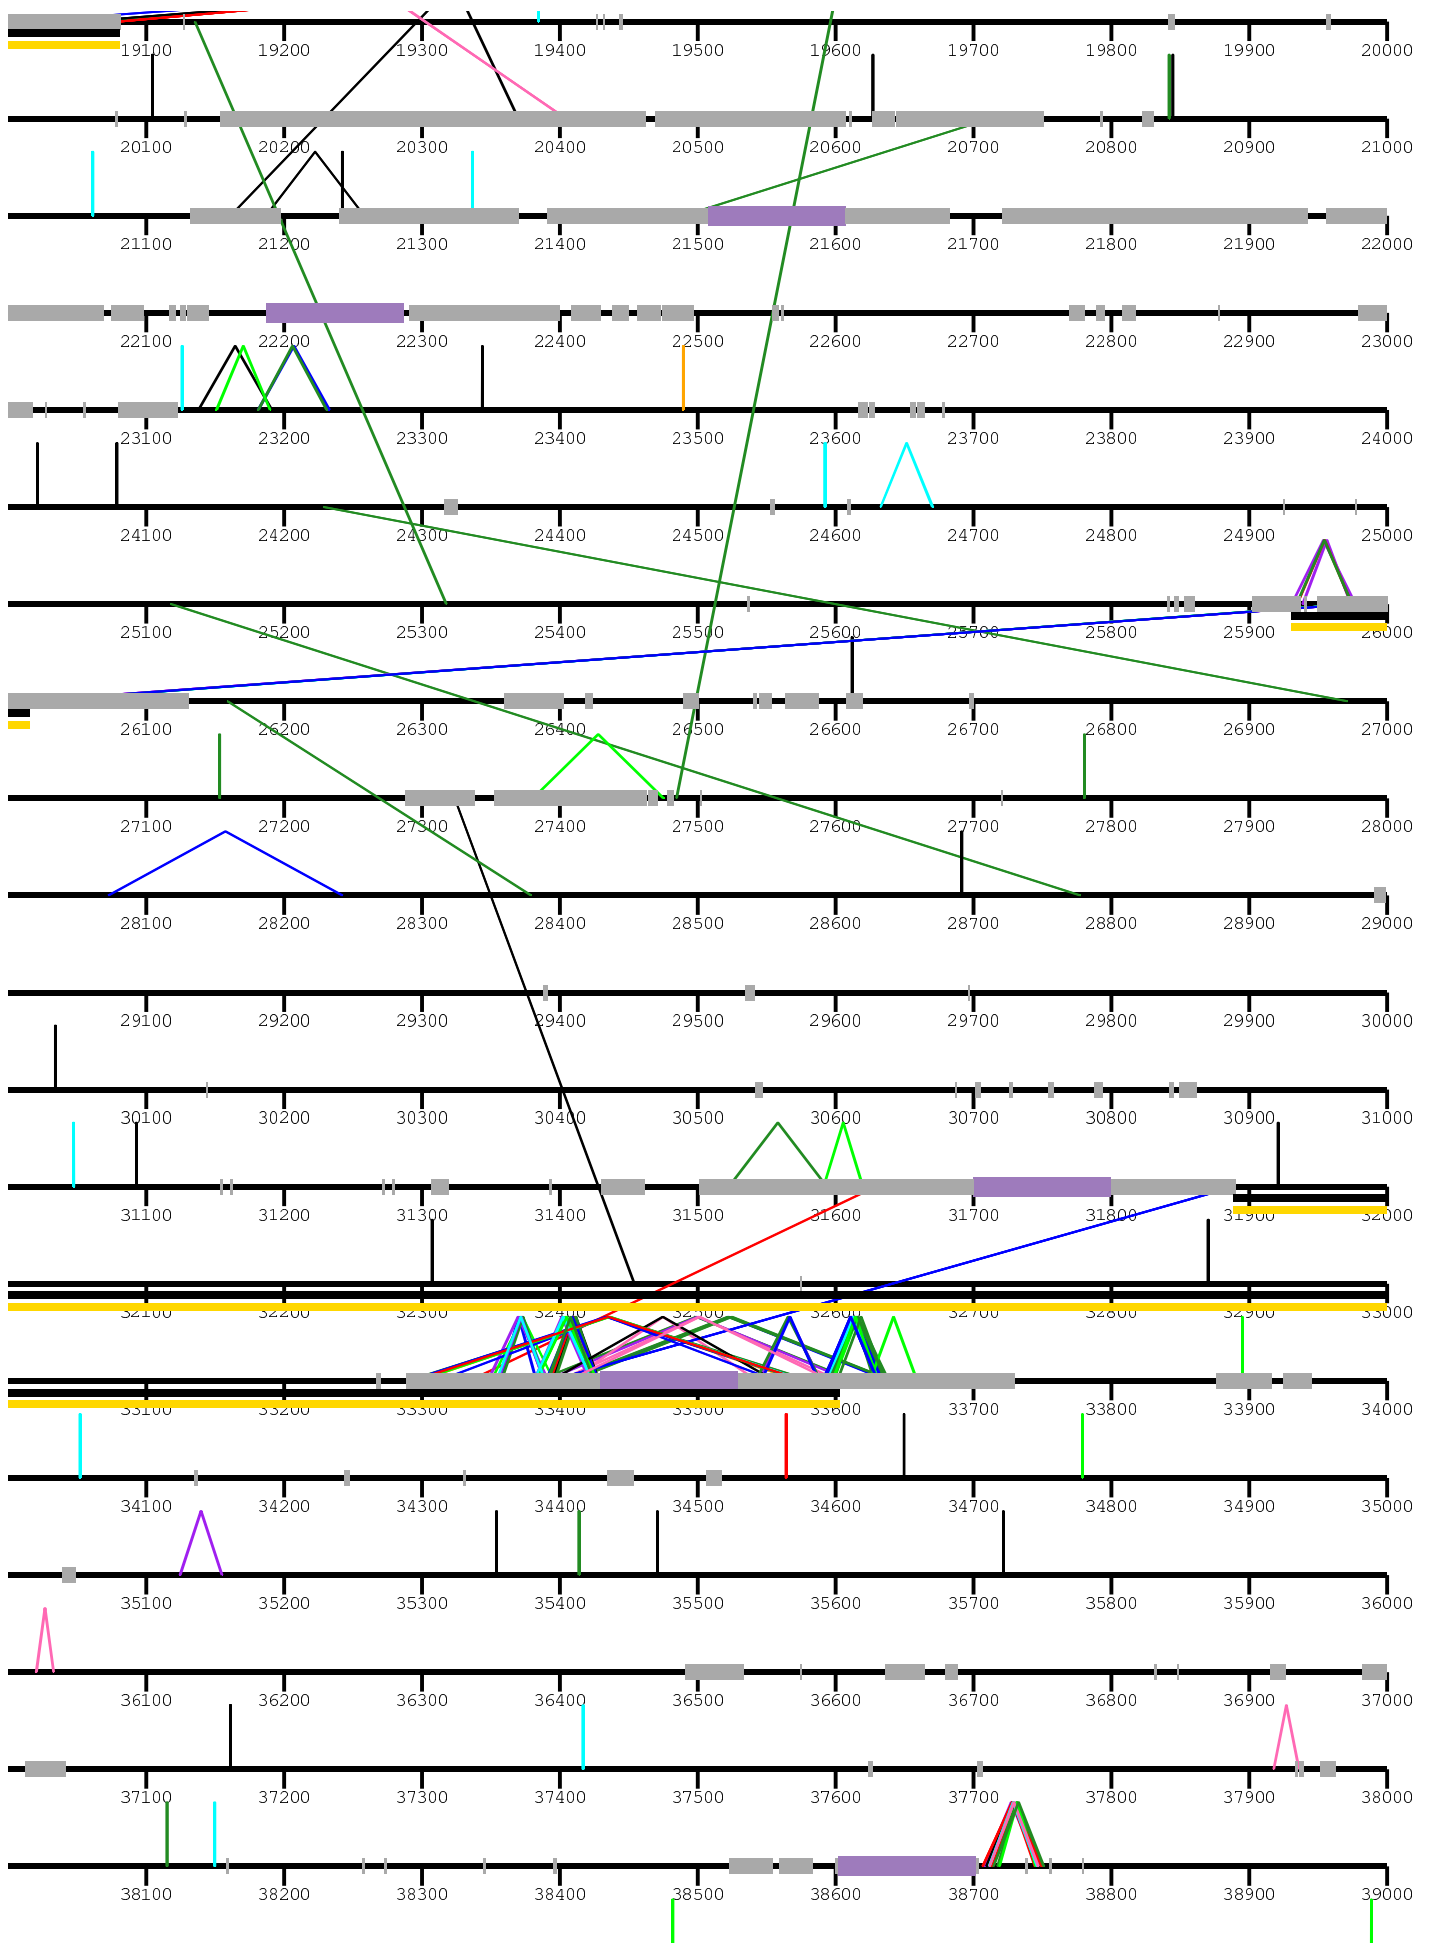

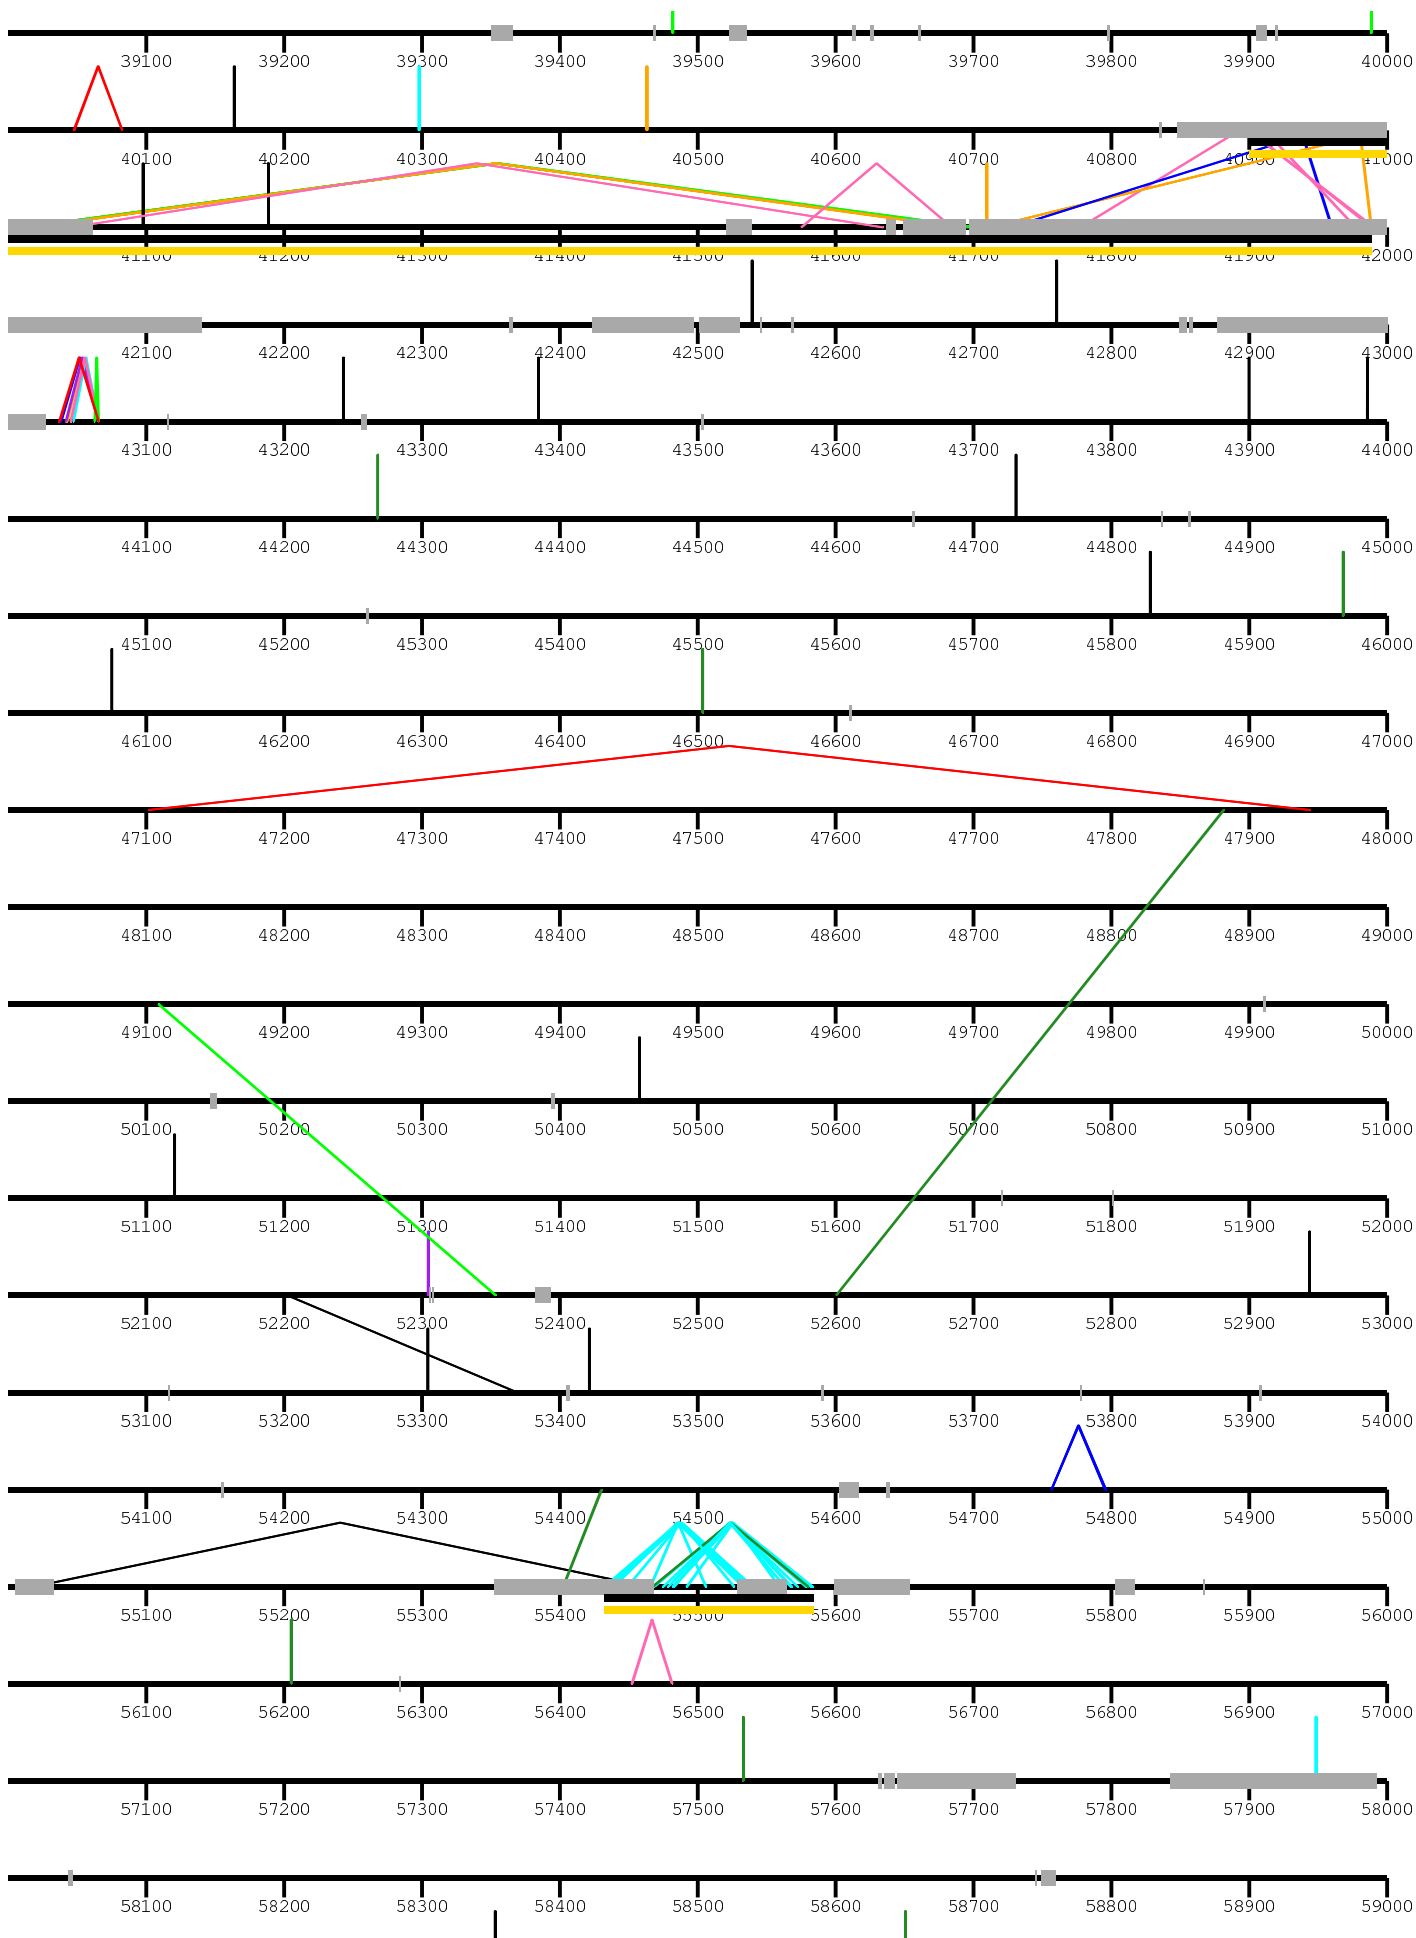

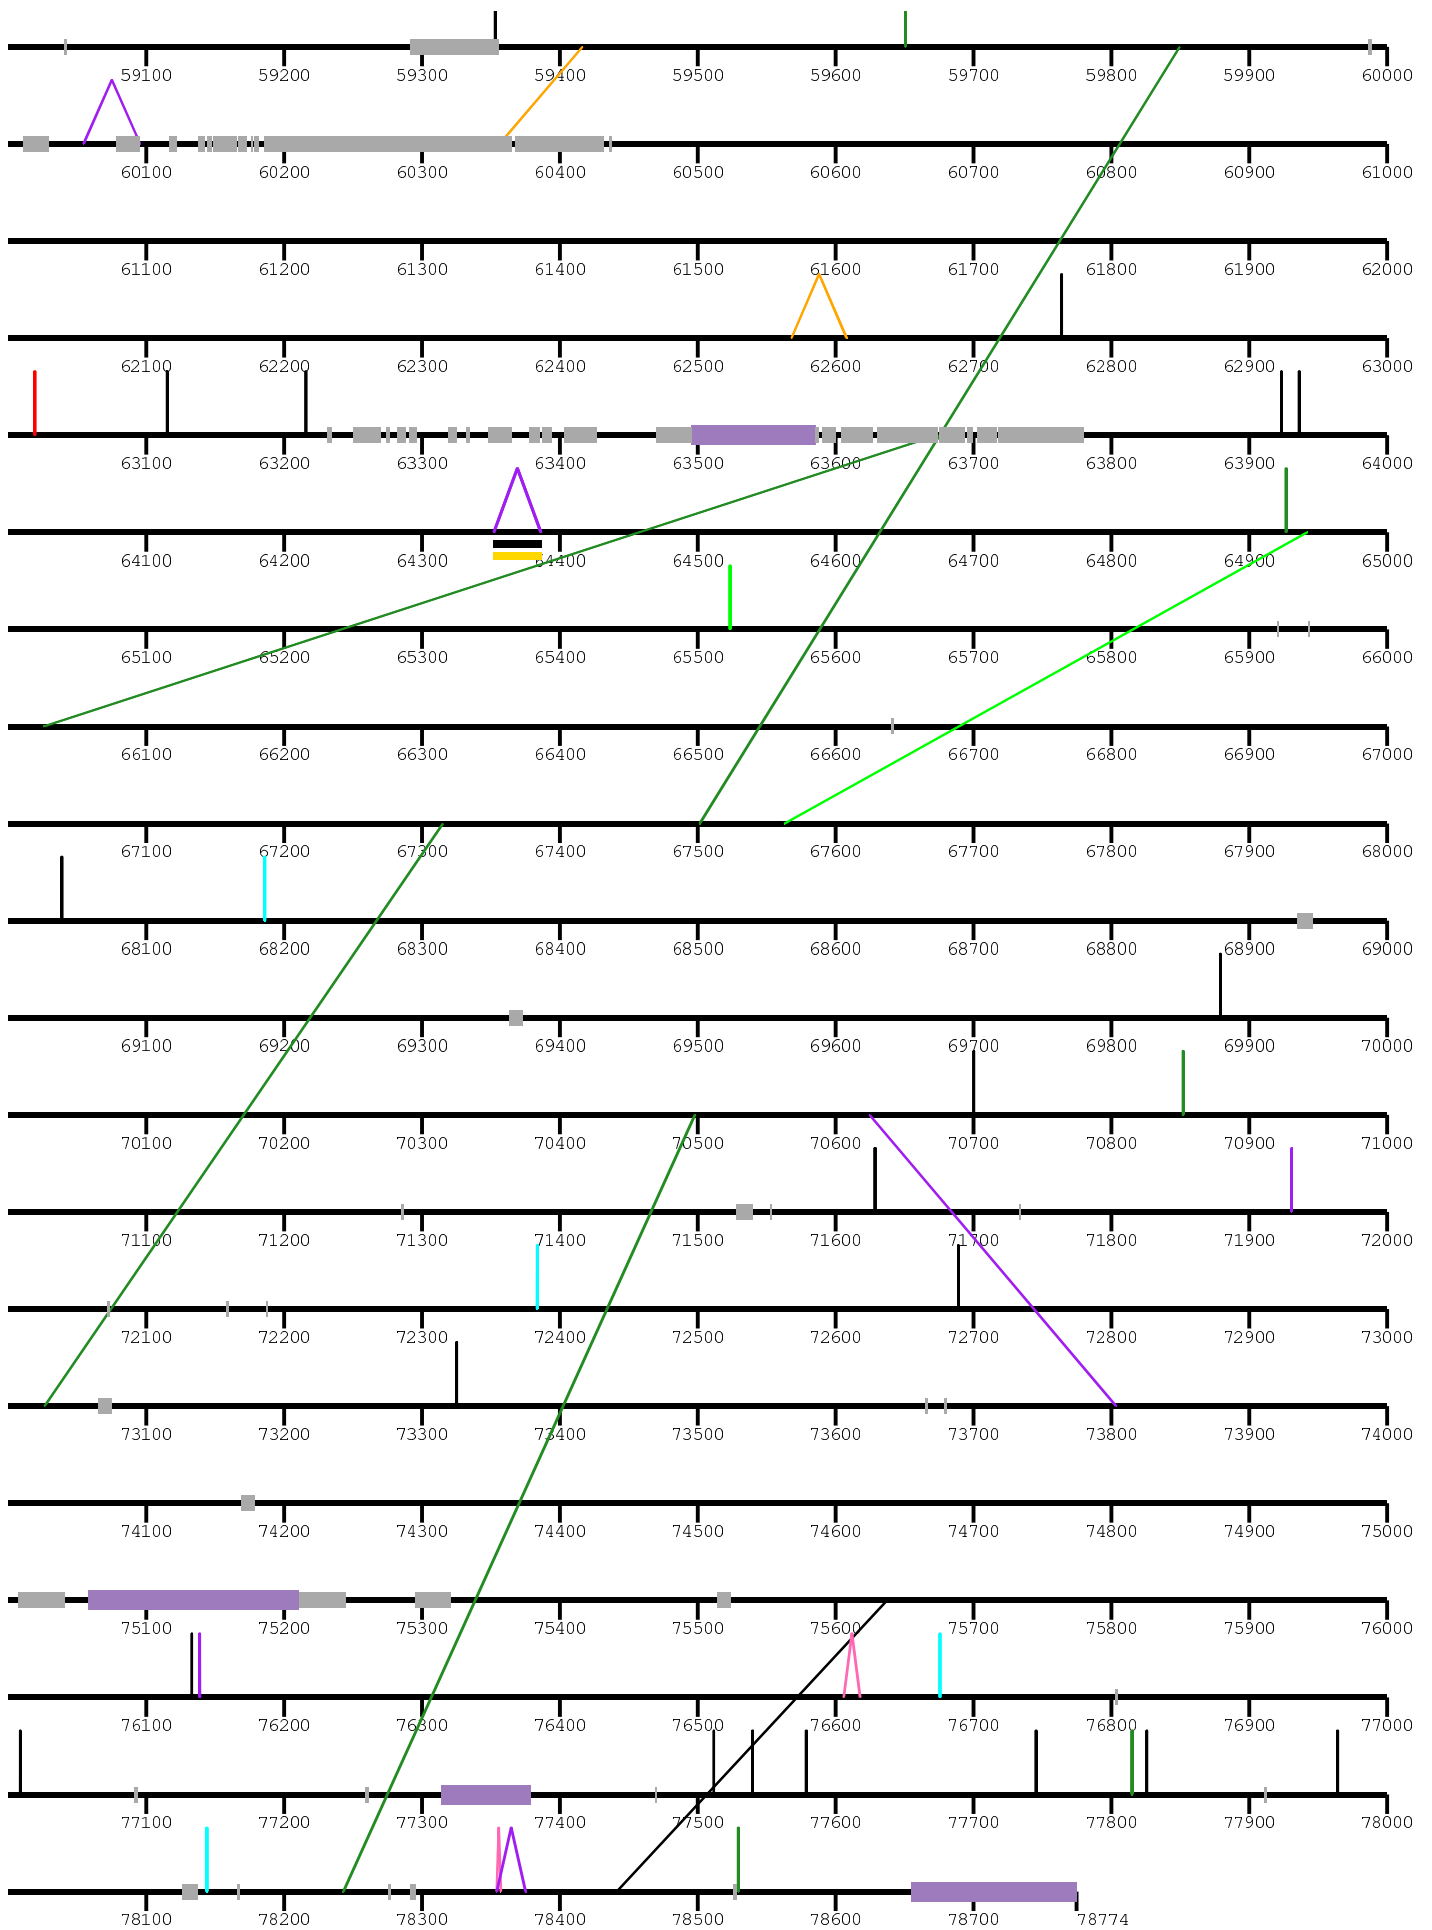

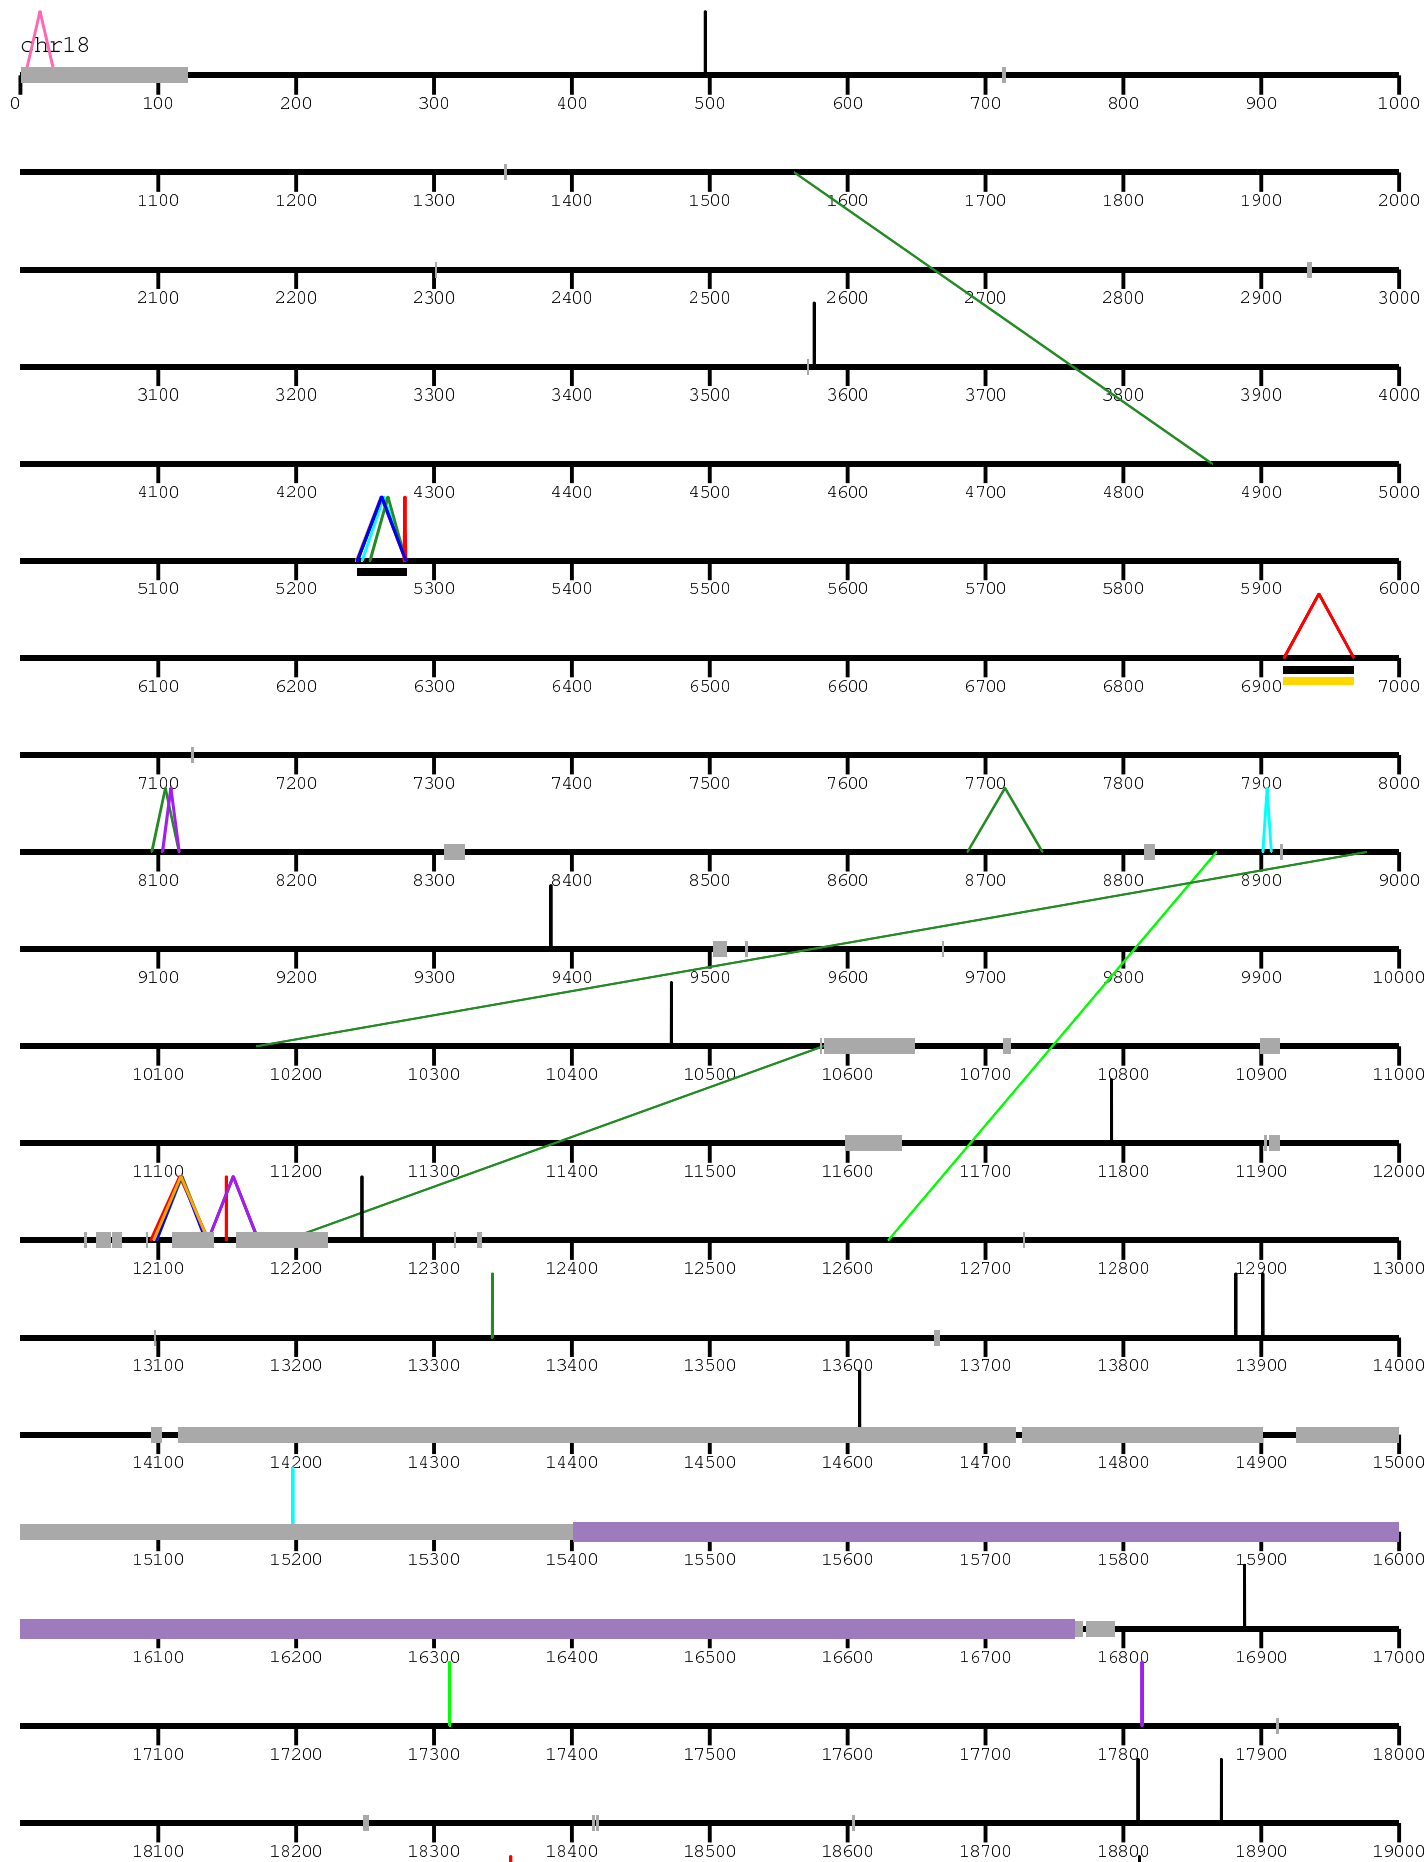



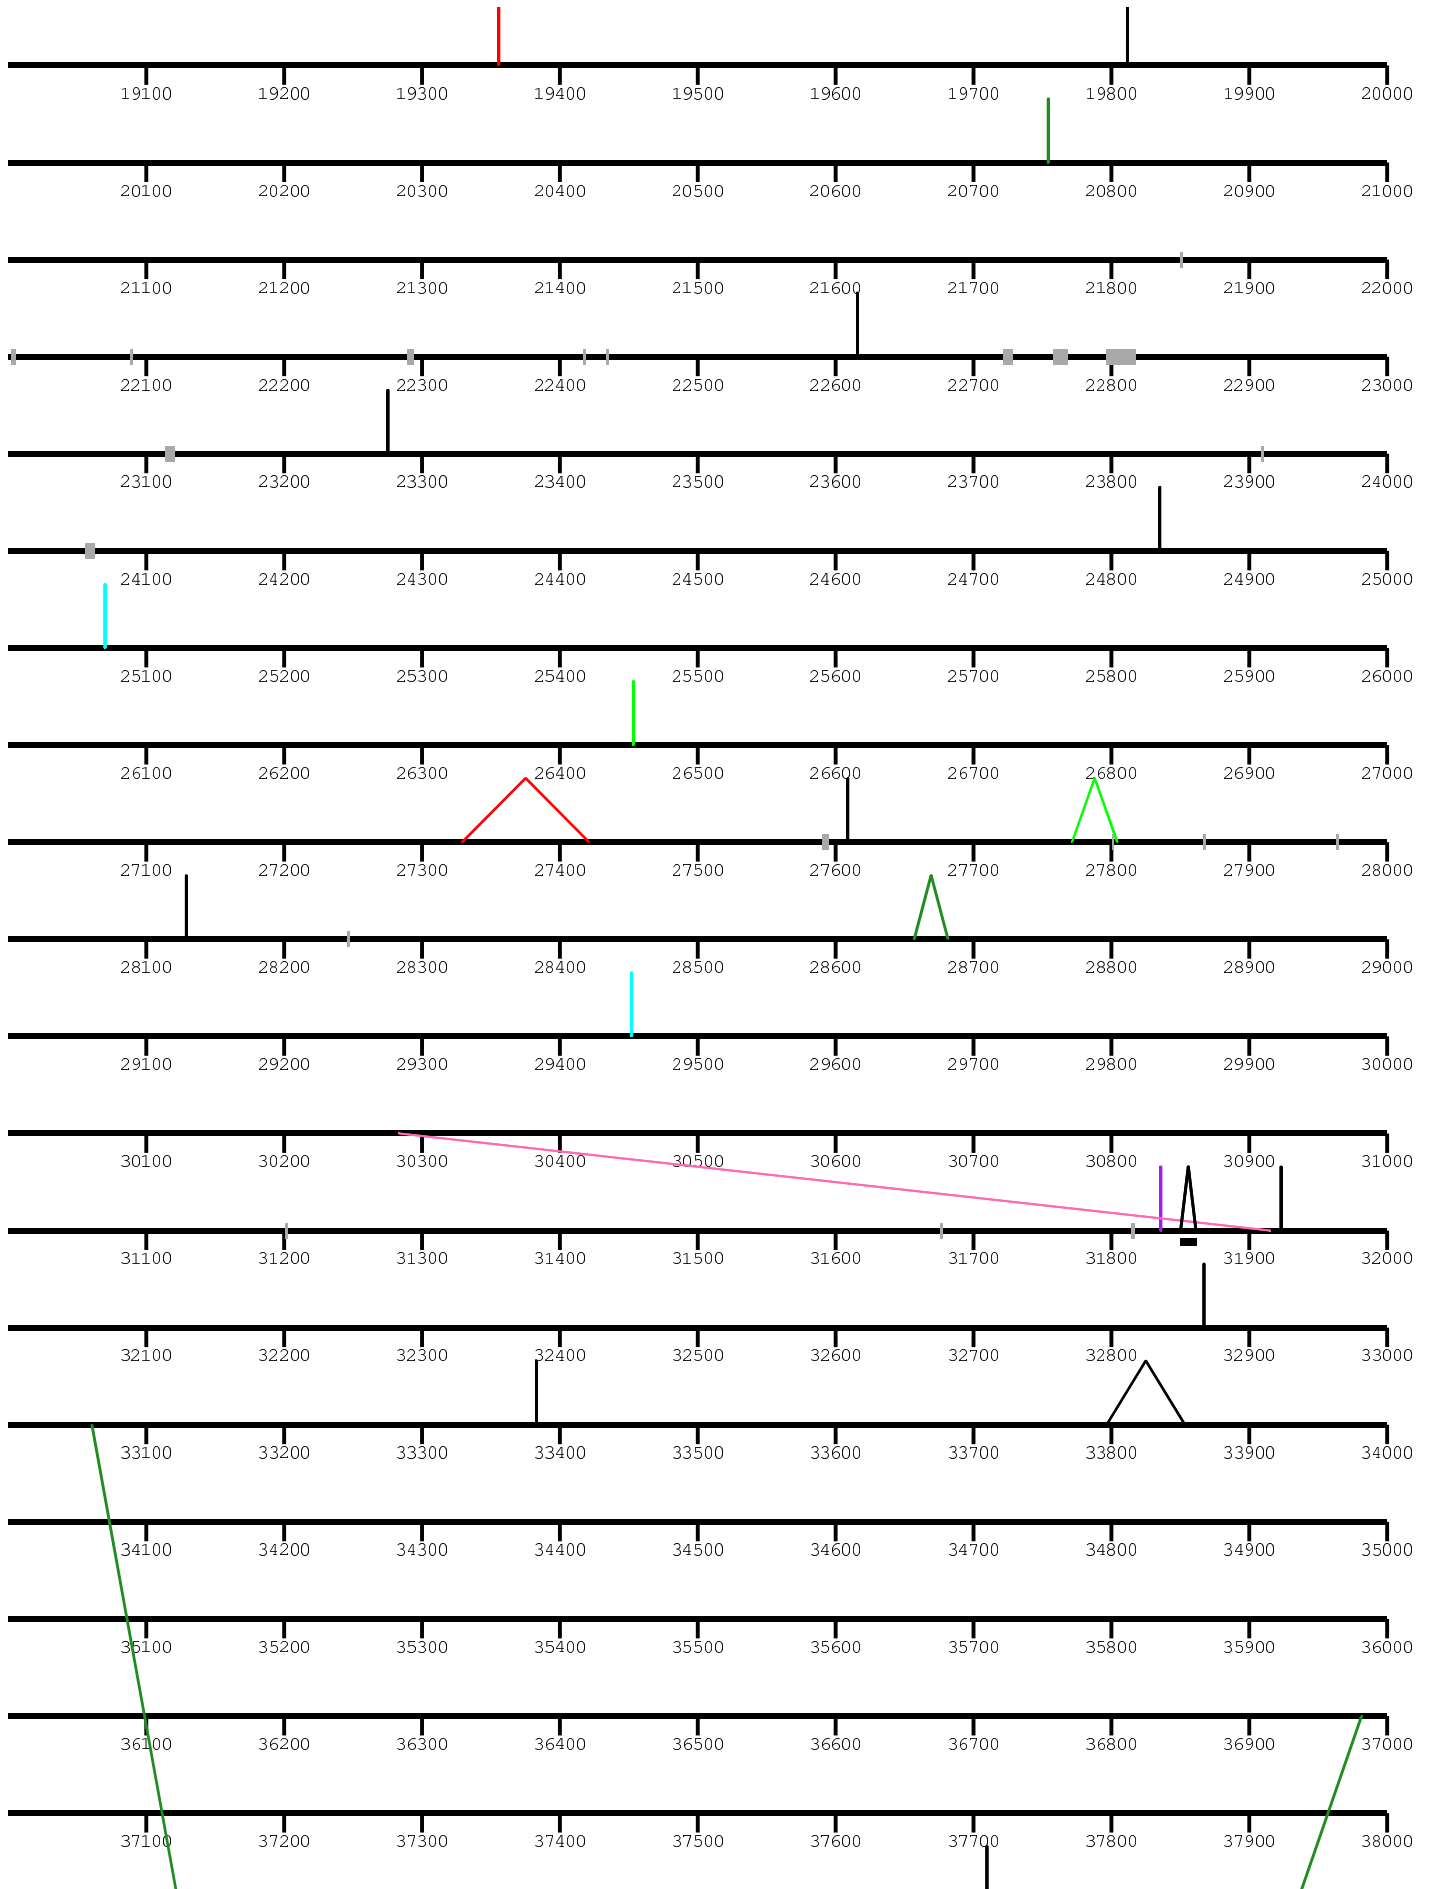

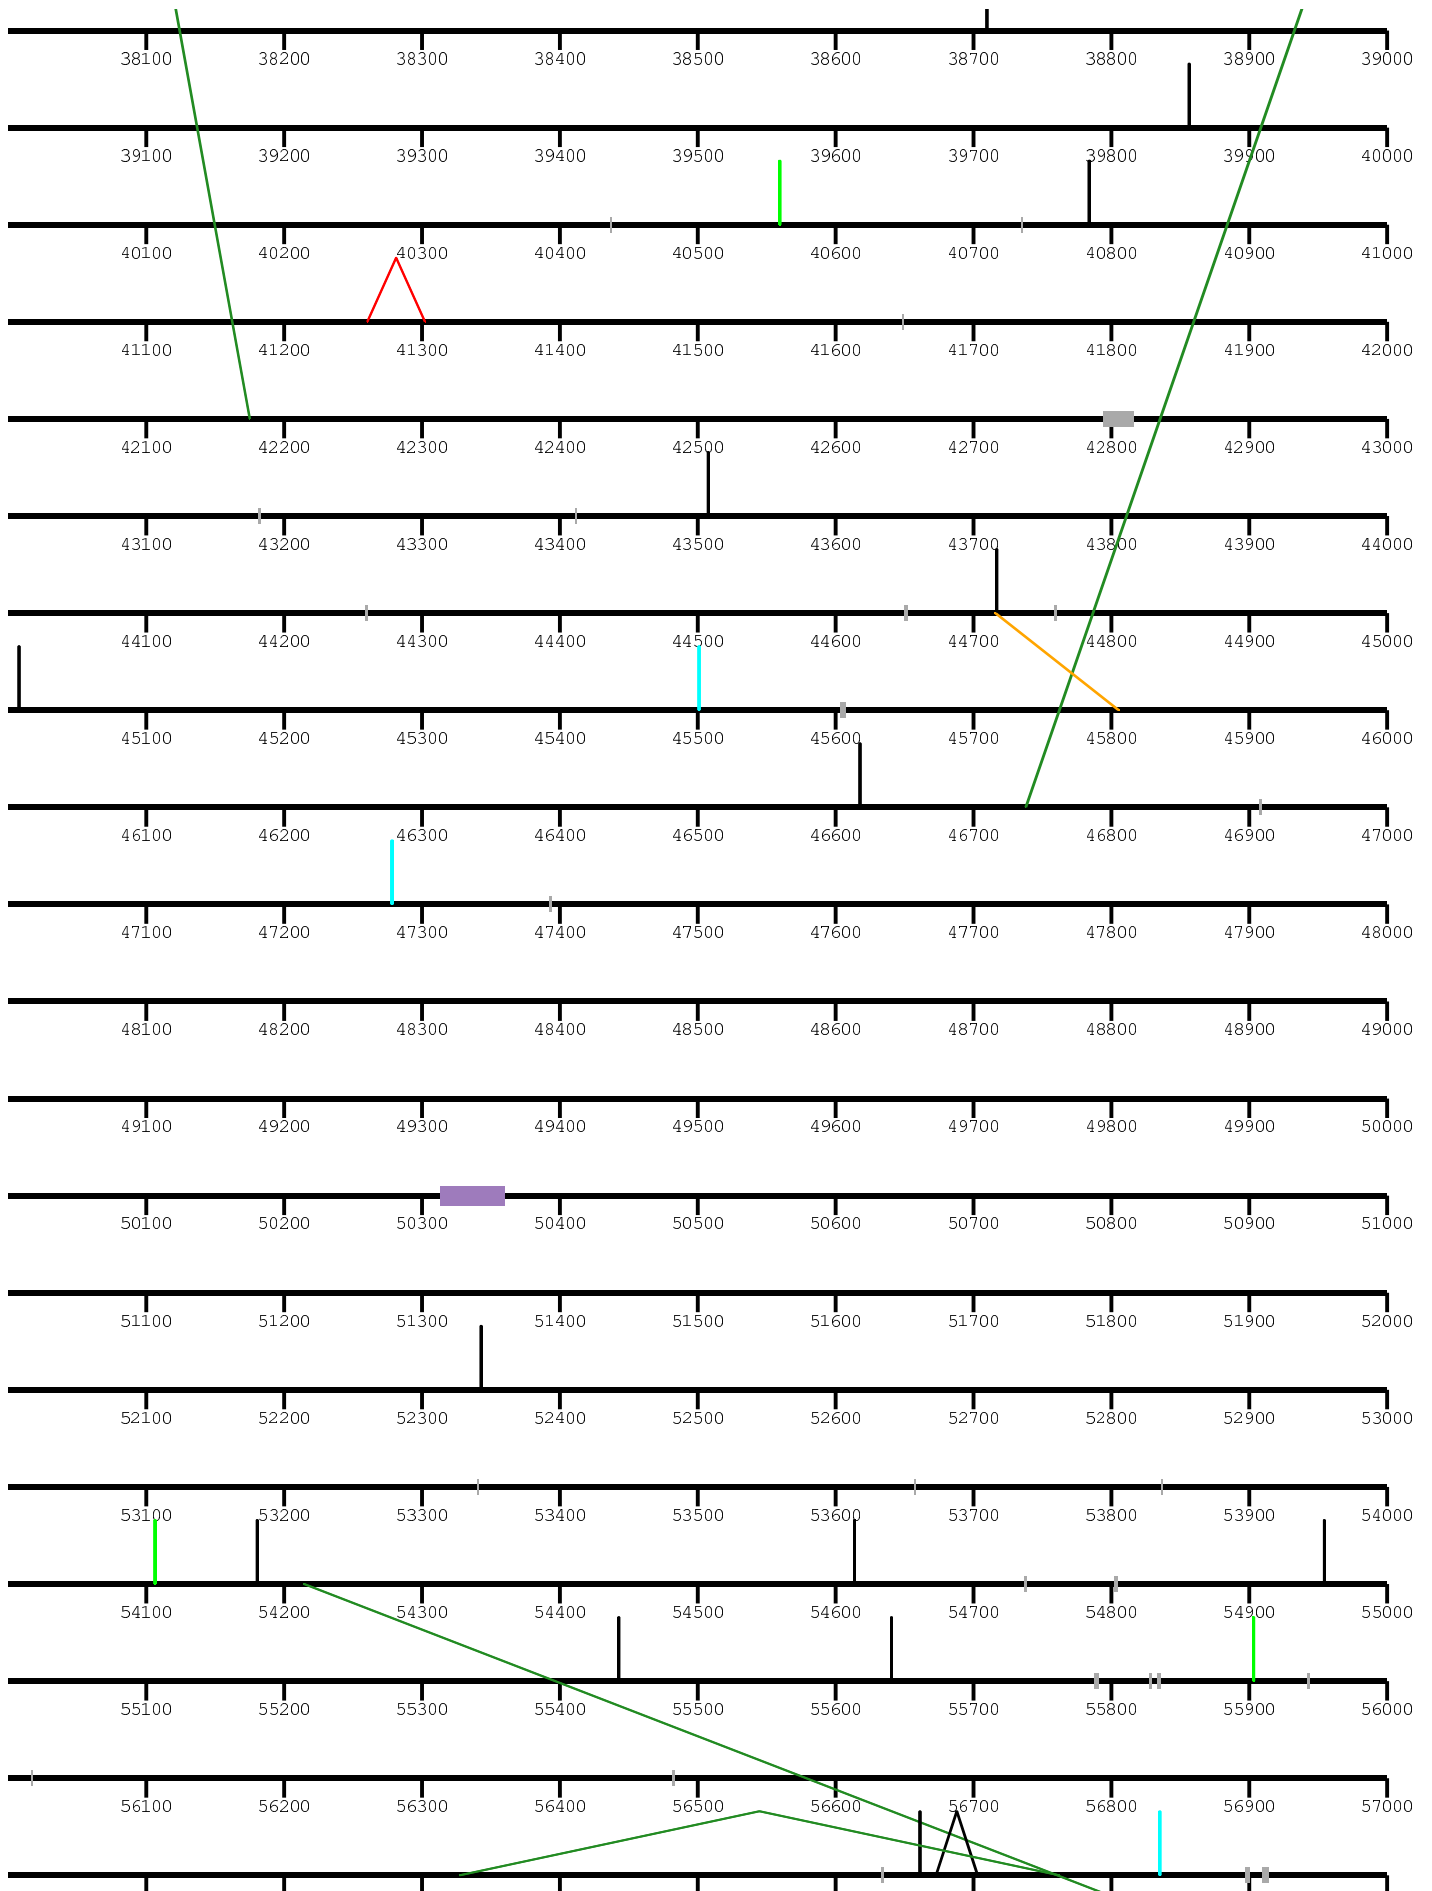

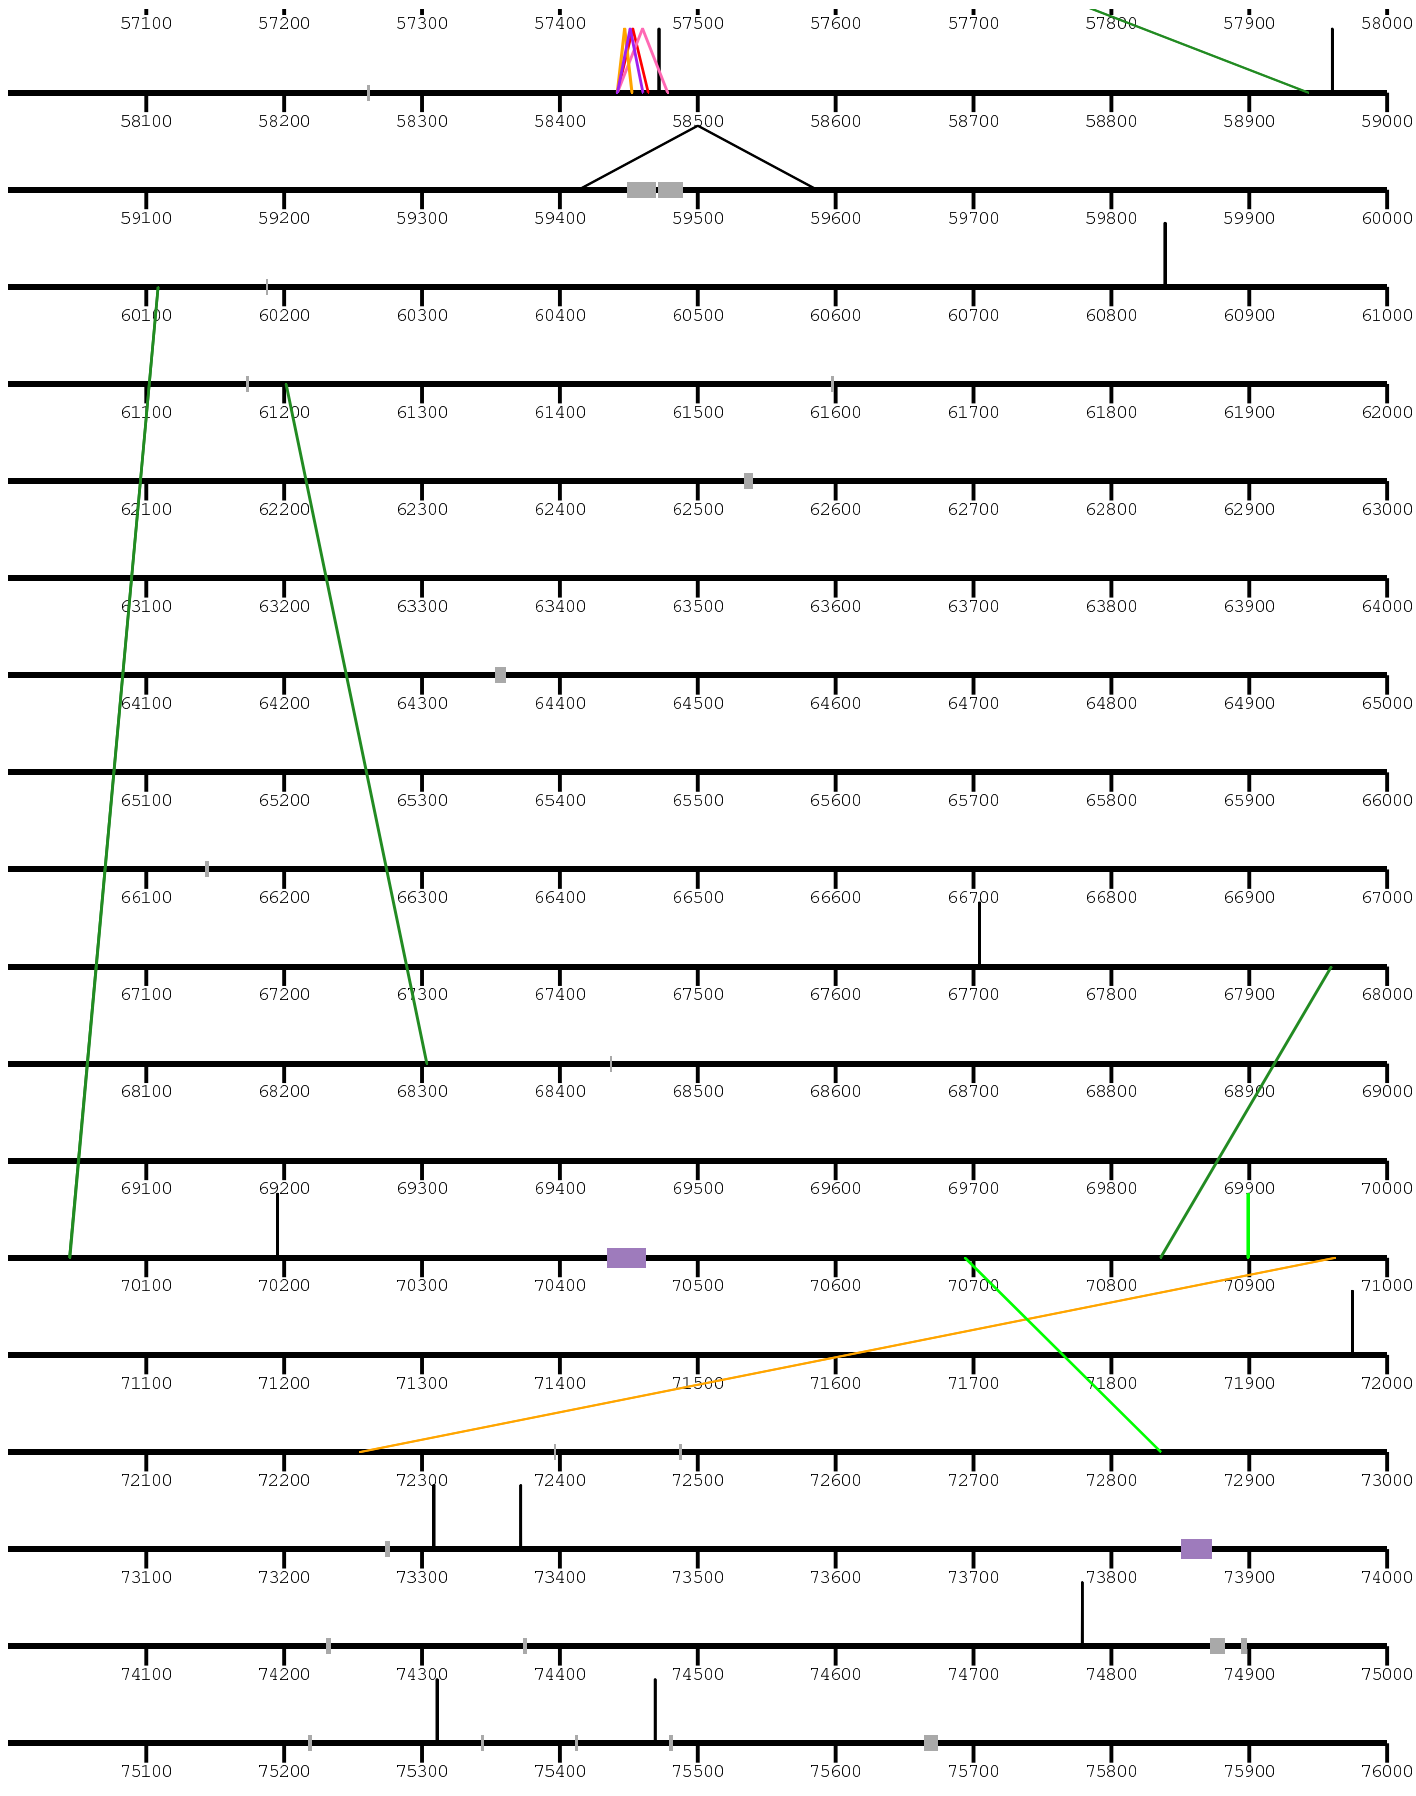

7610076117

chr19

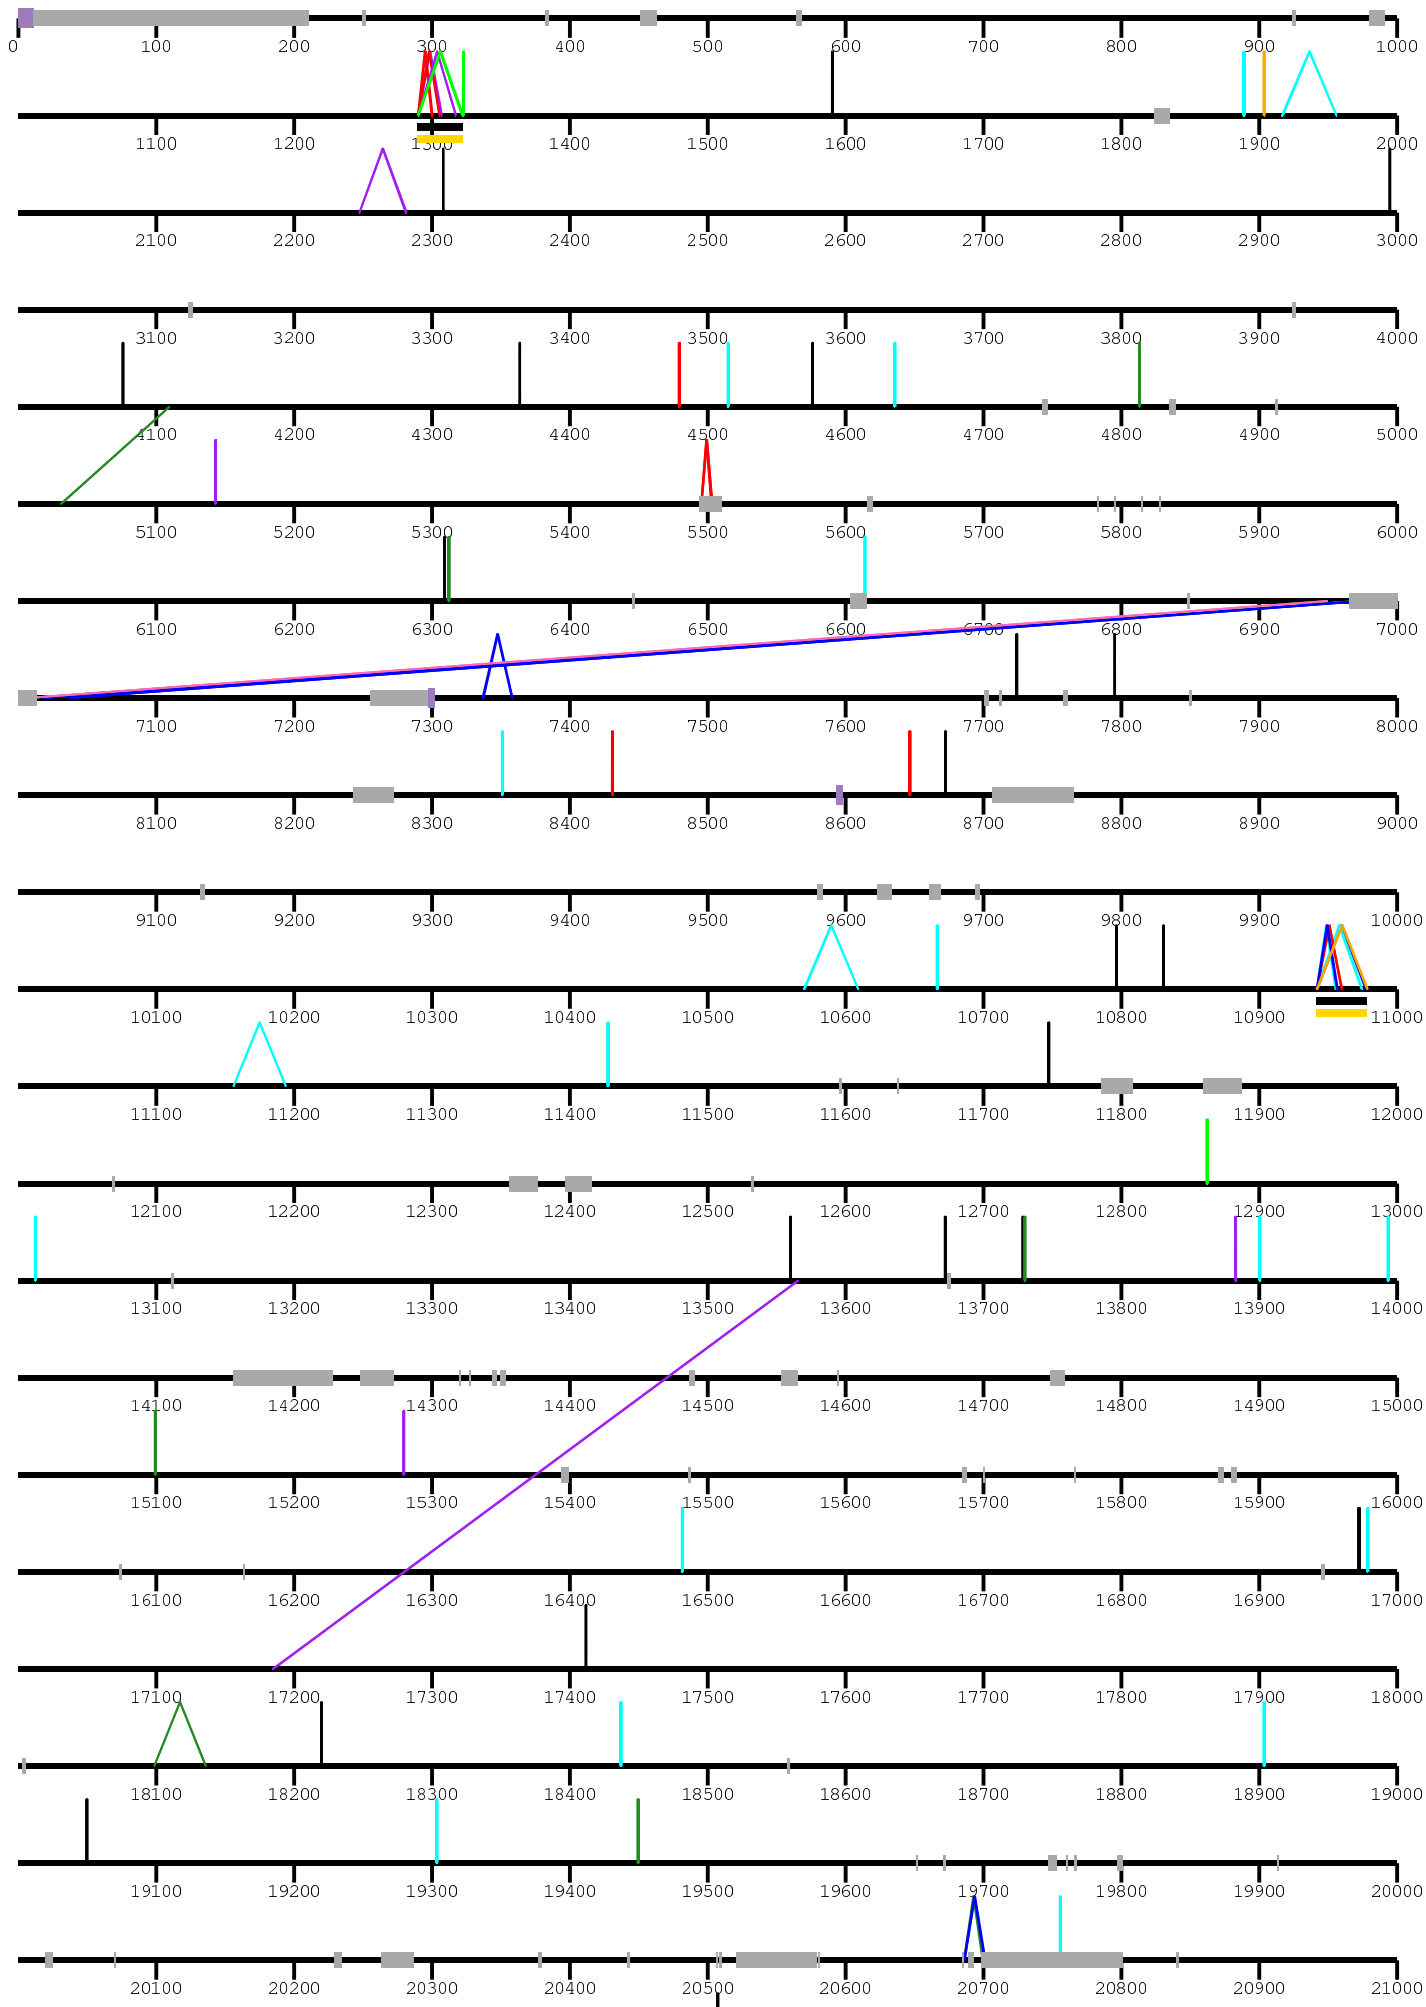

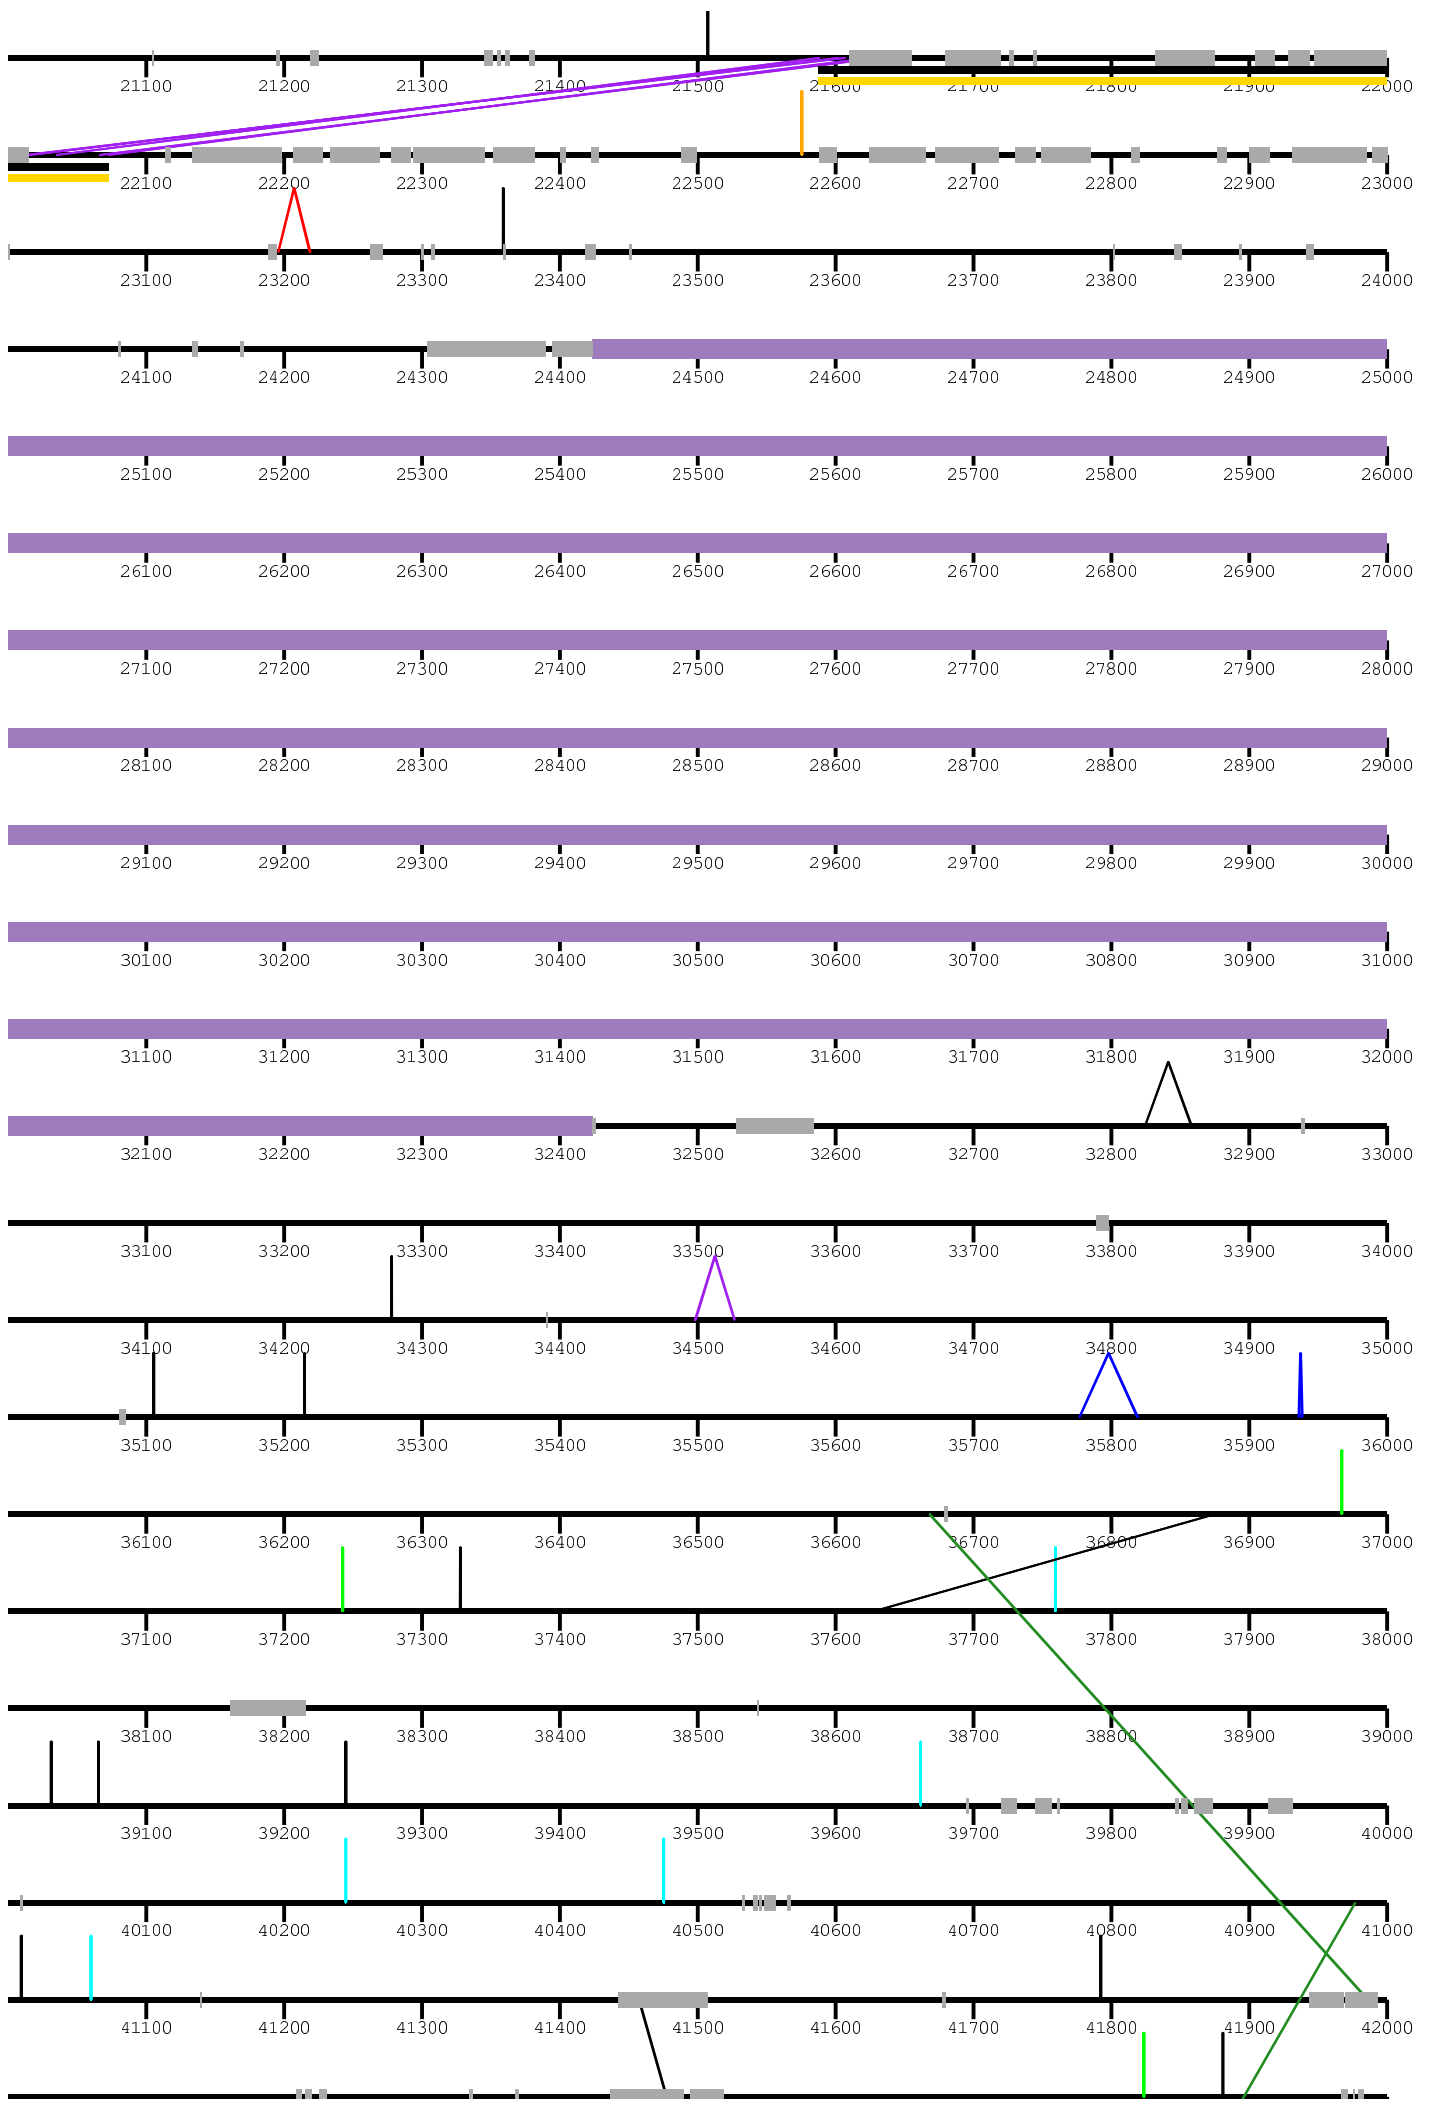

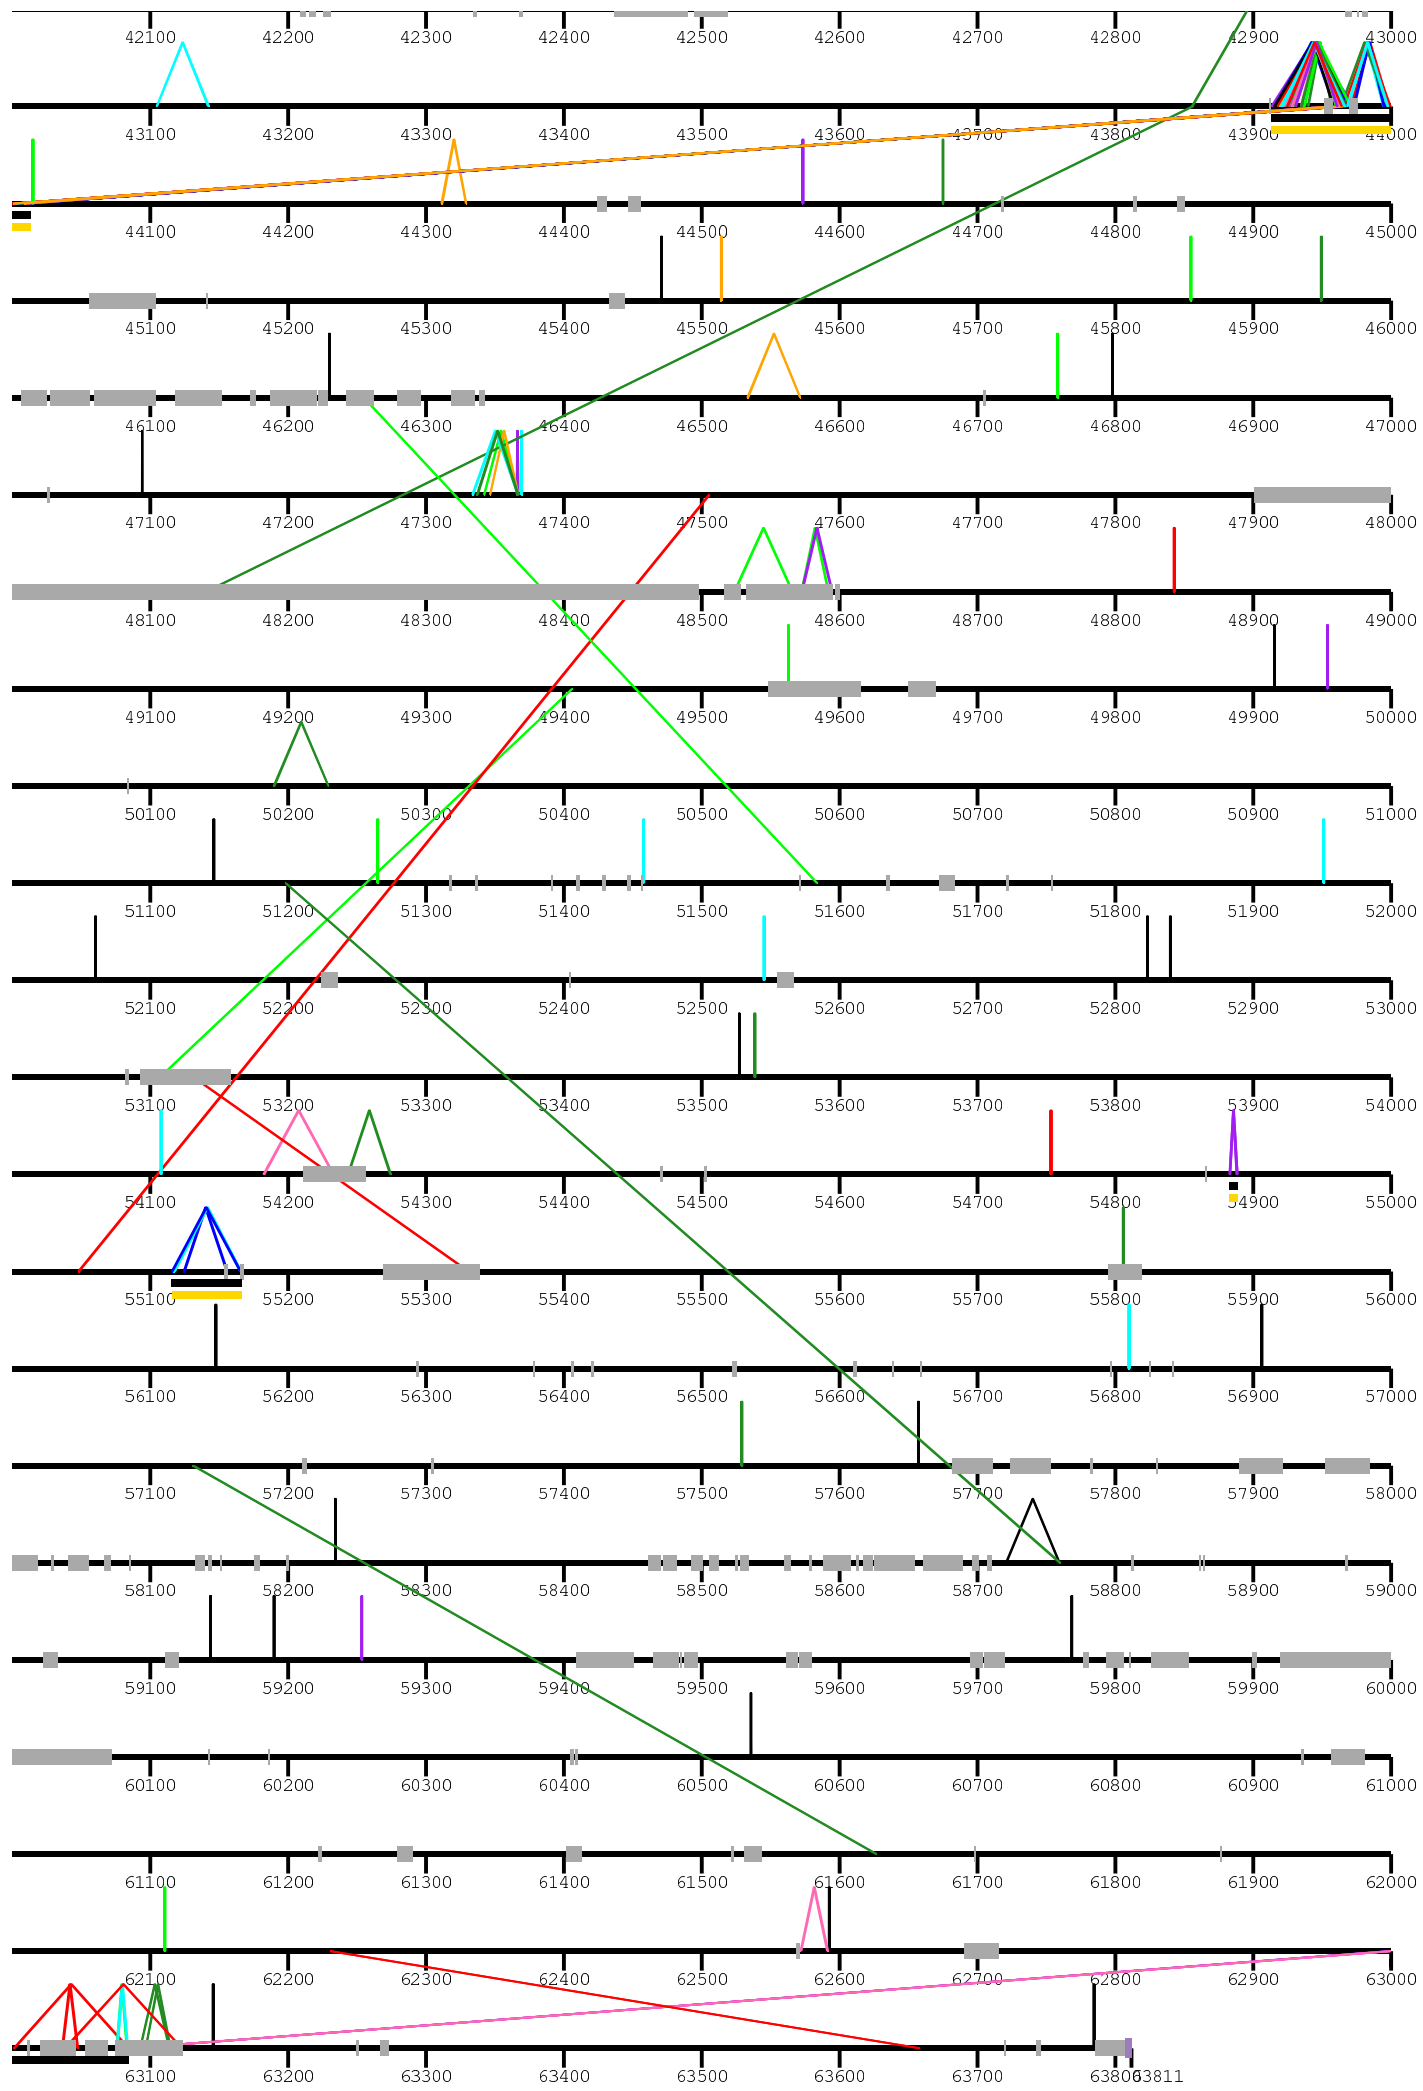

chr20

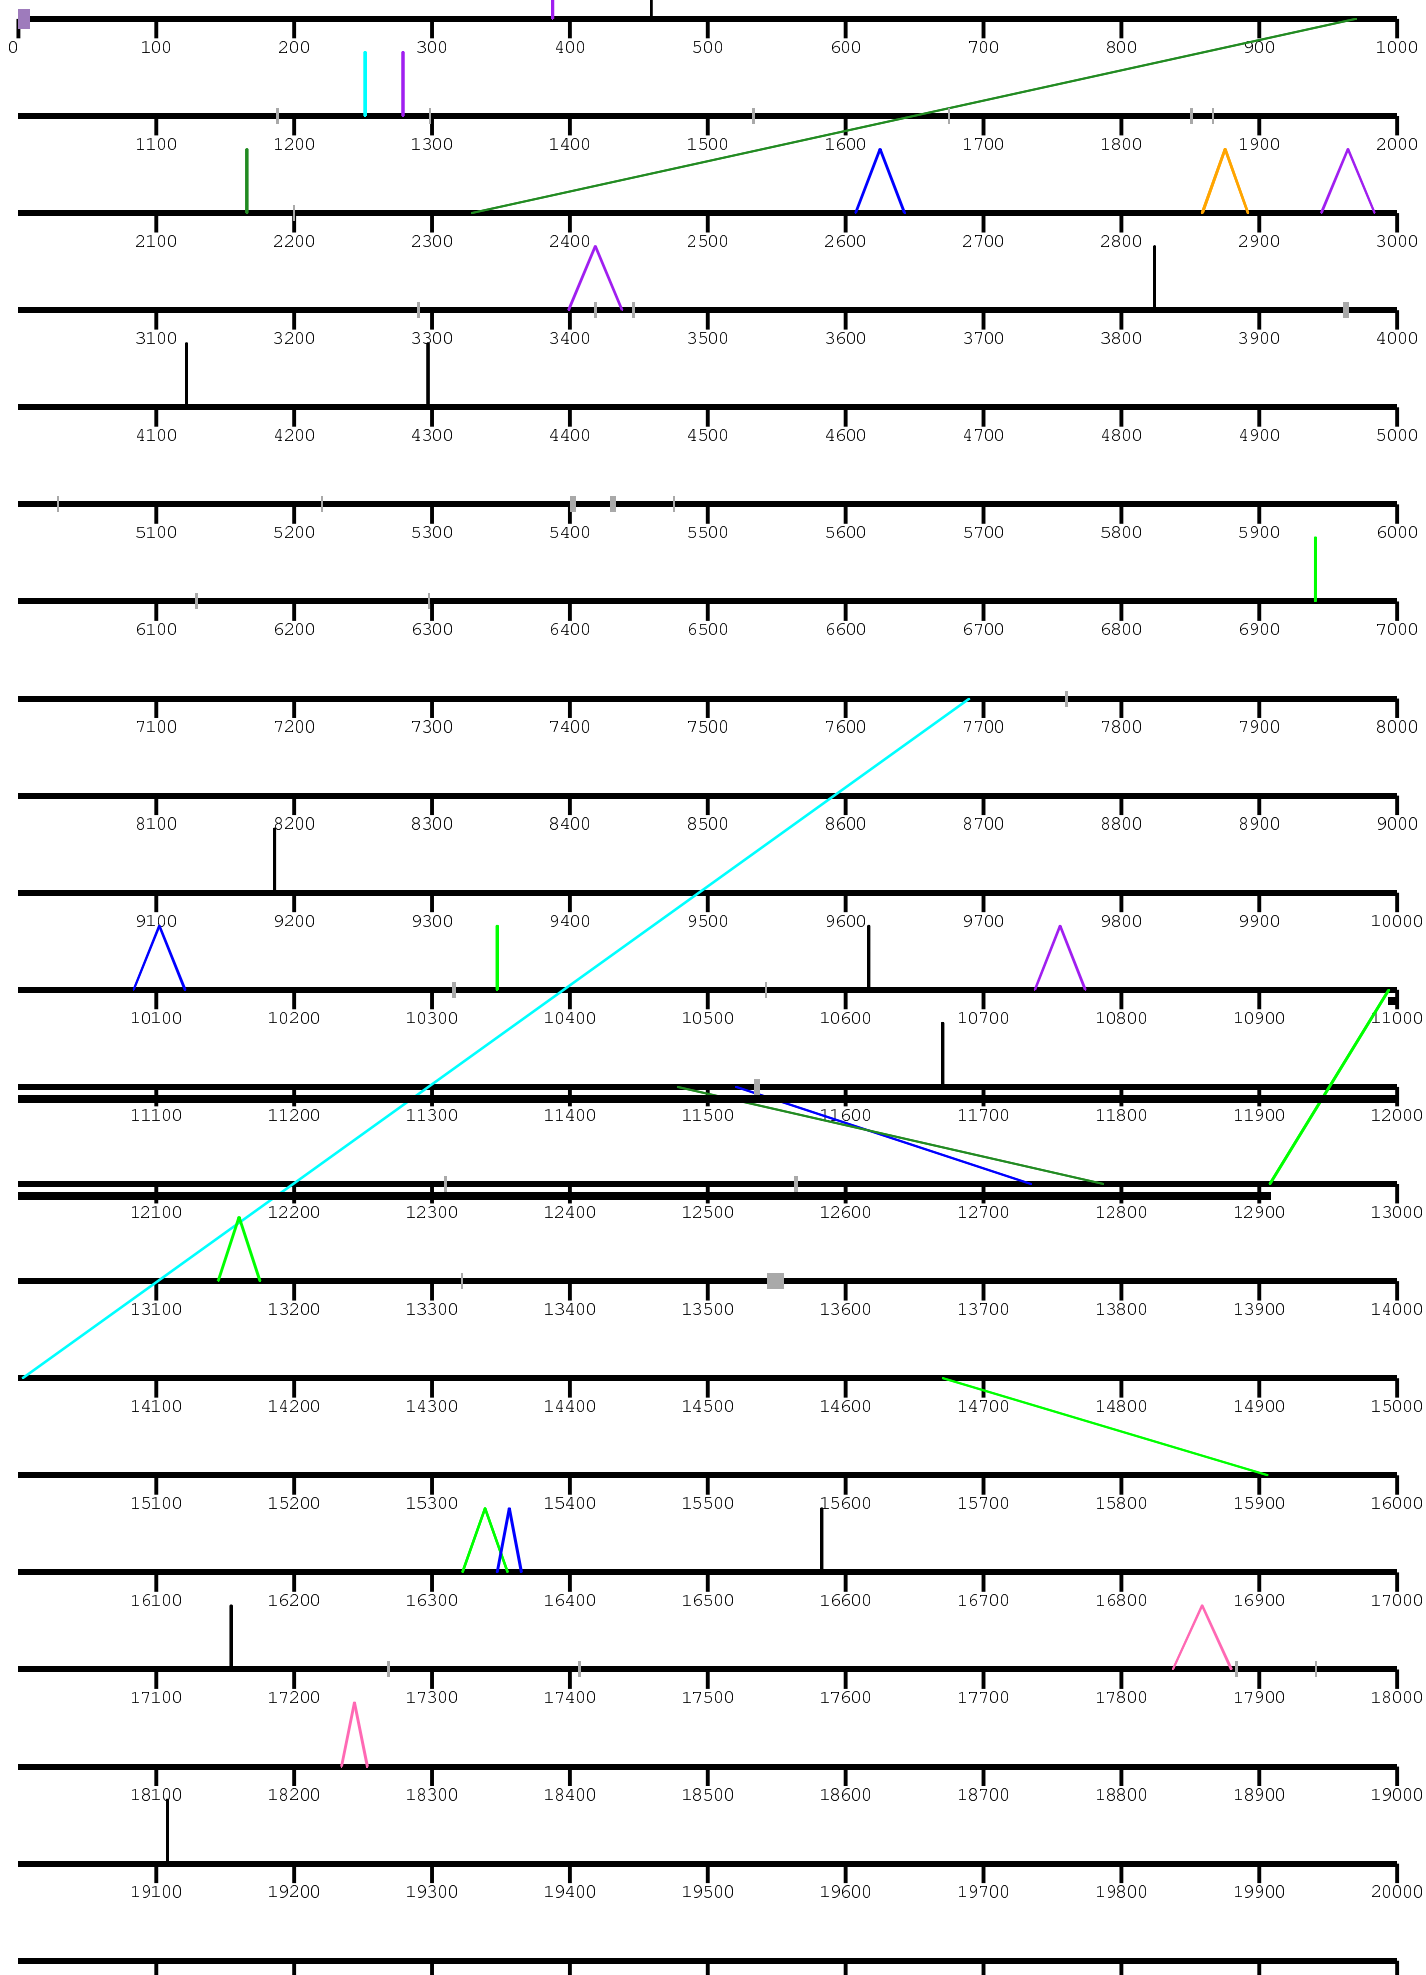

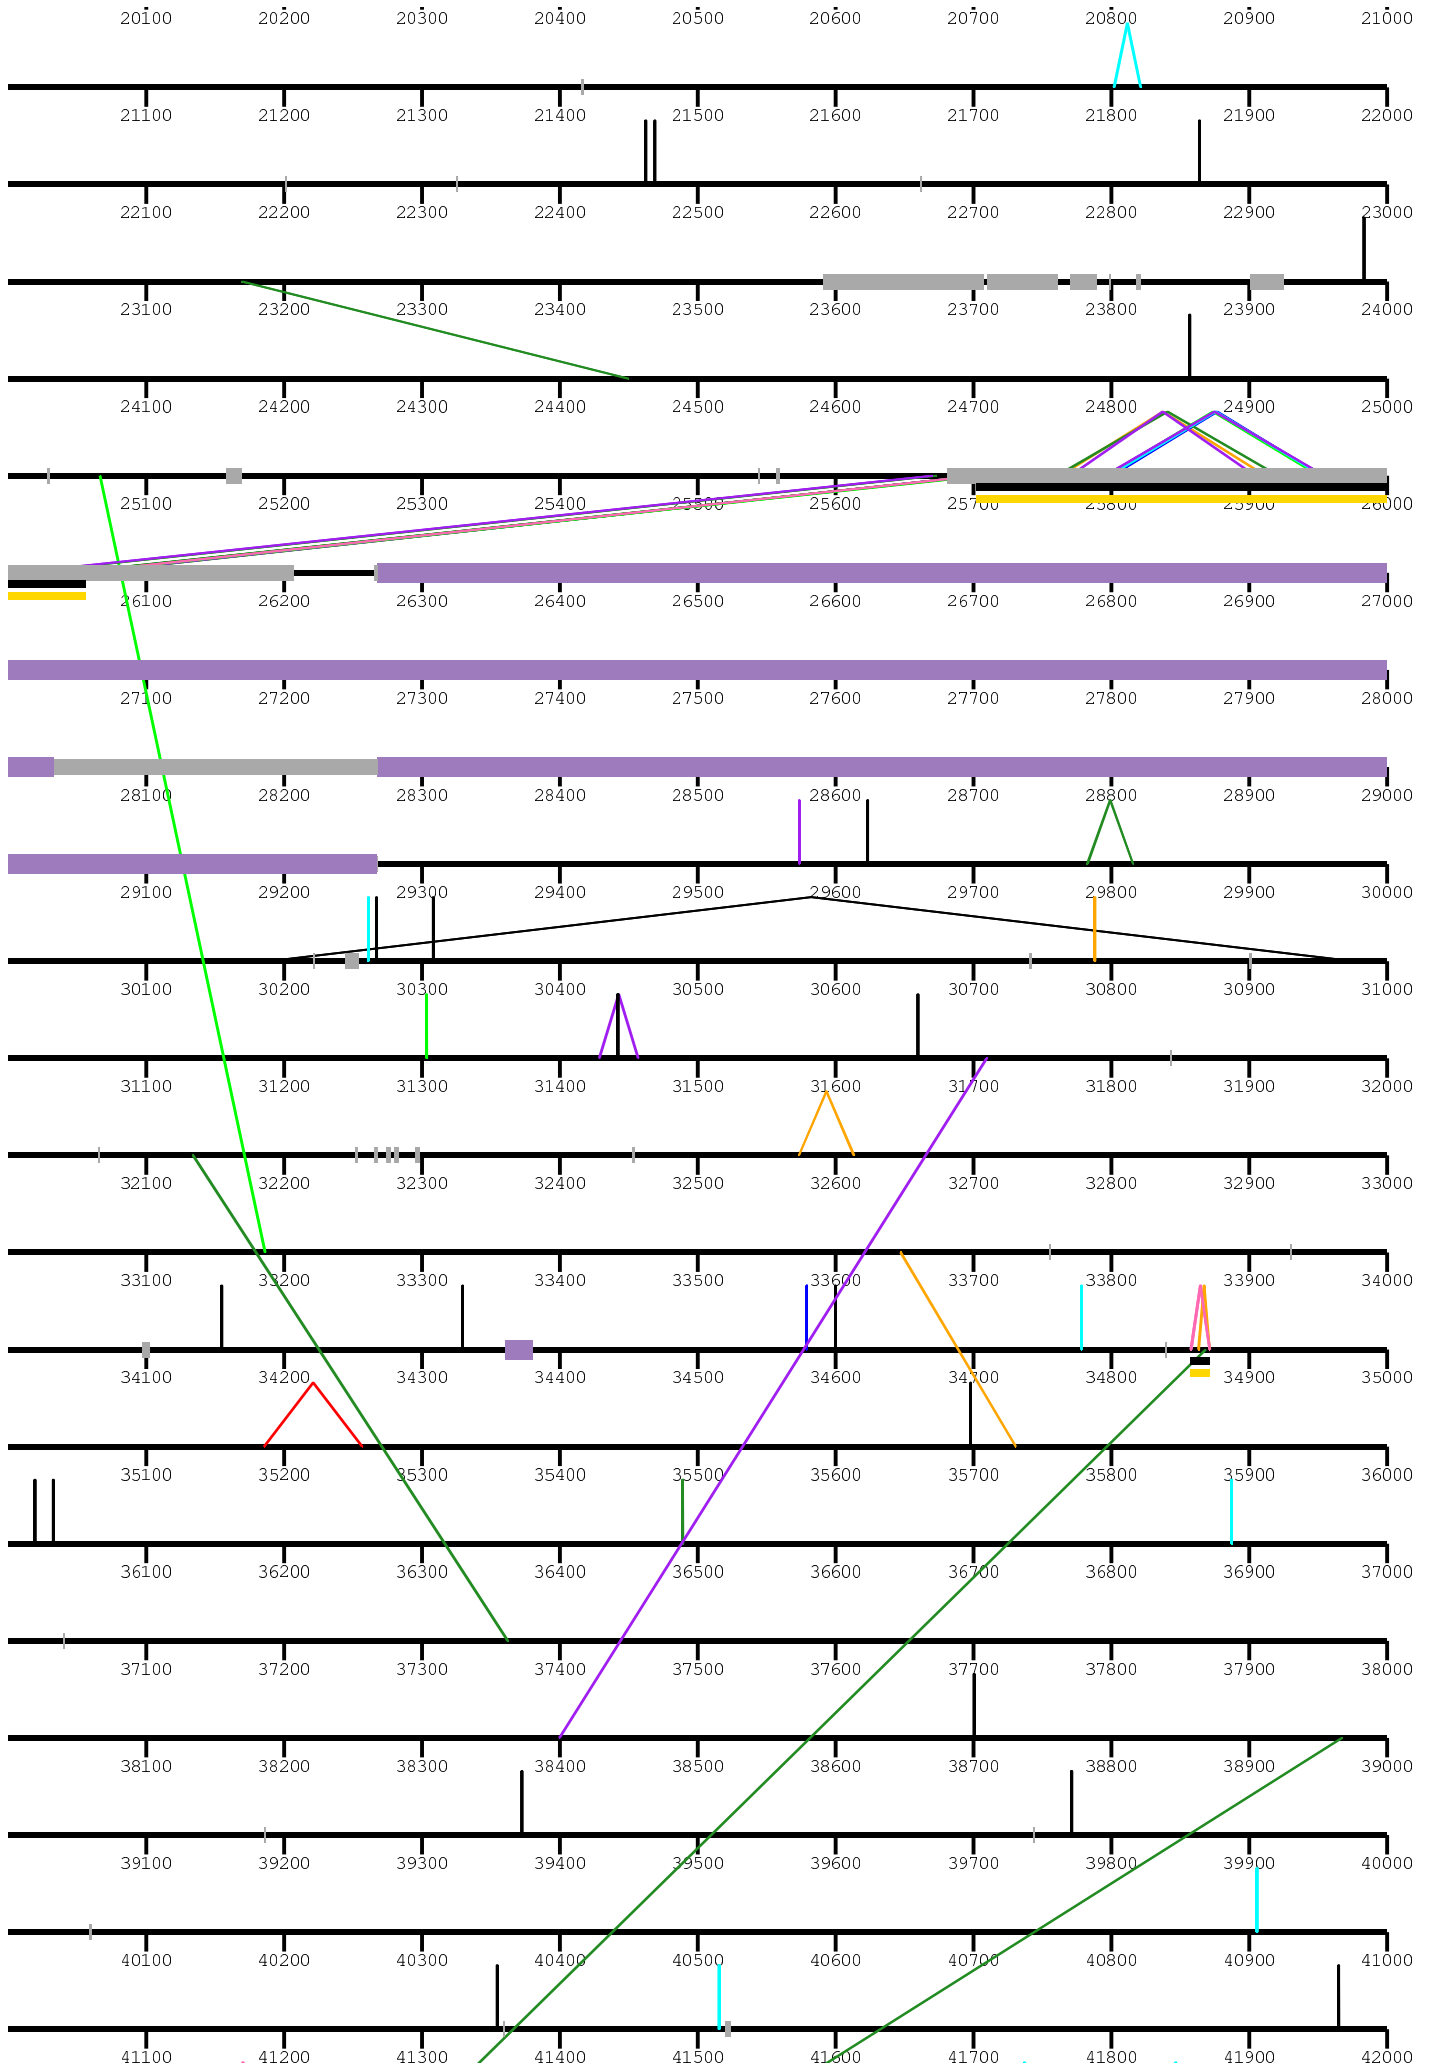



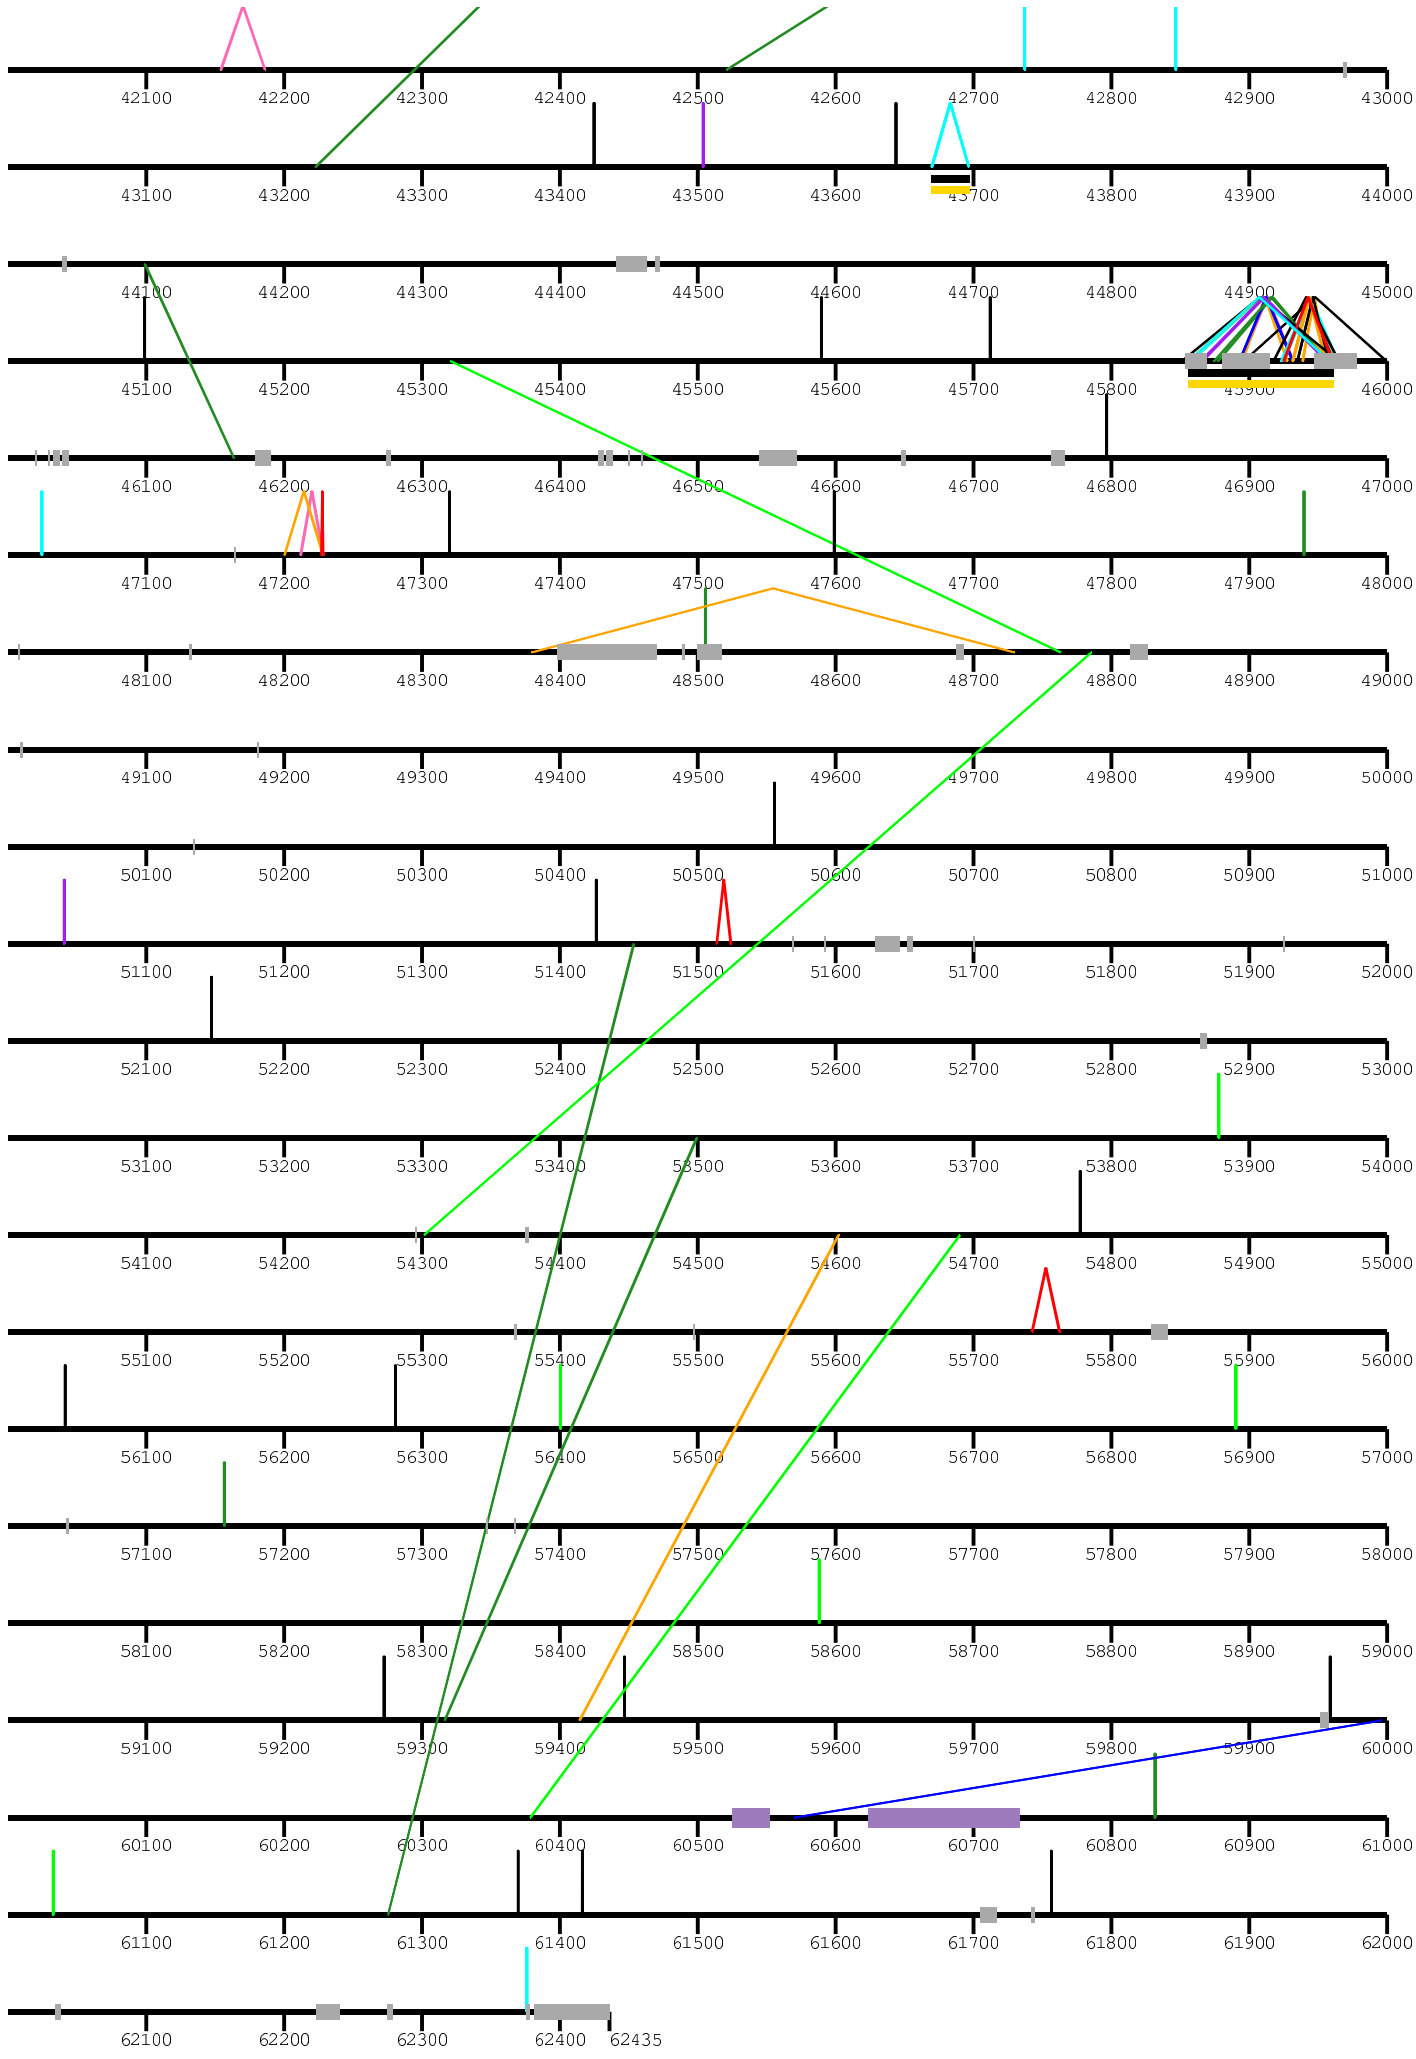

chr21

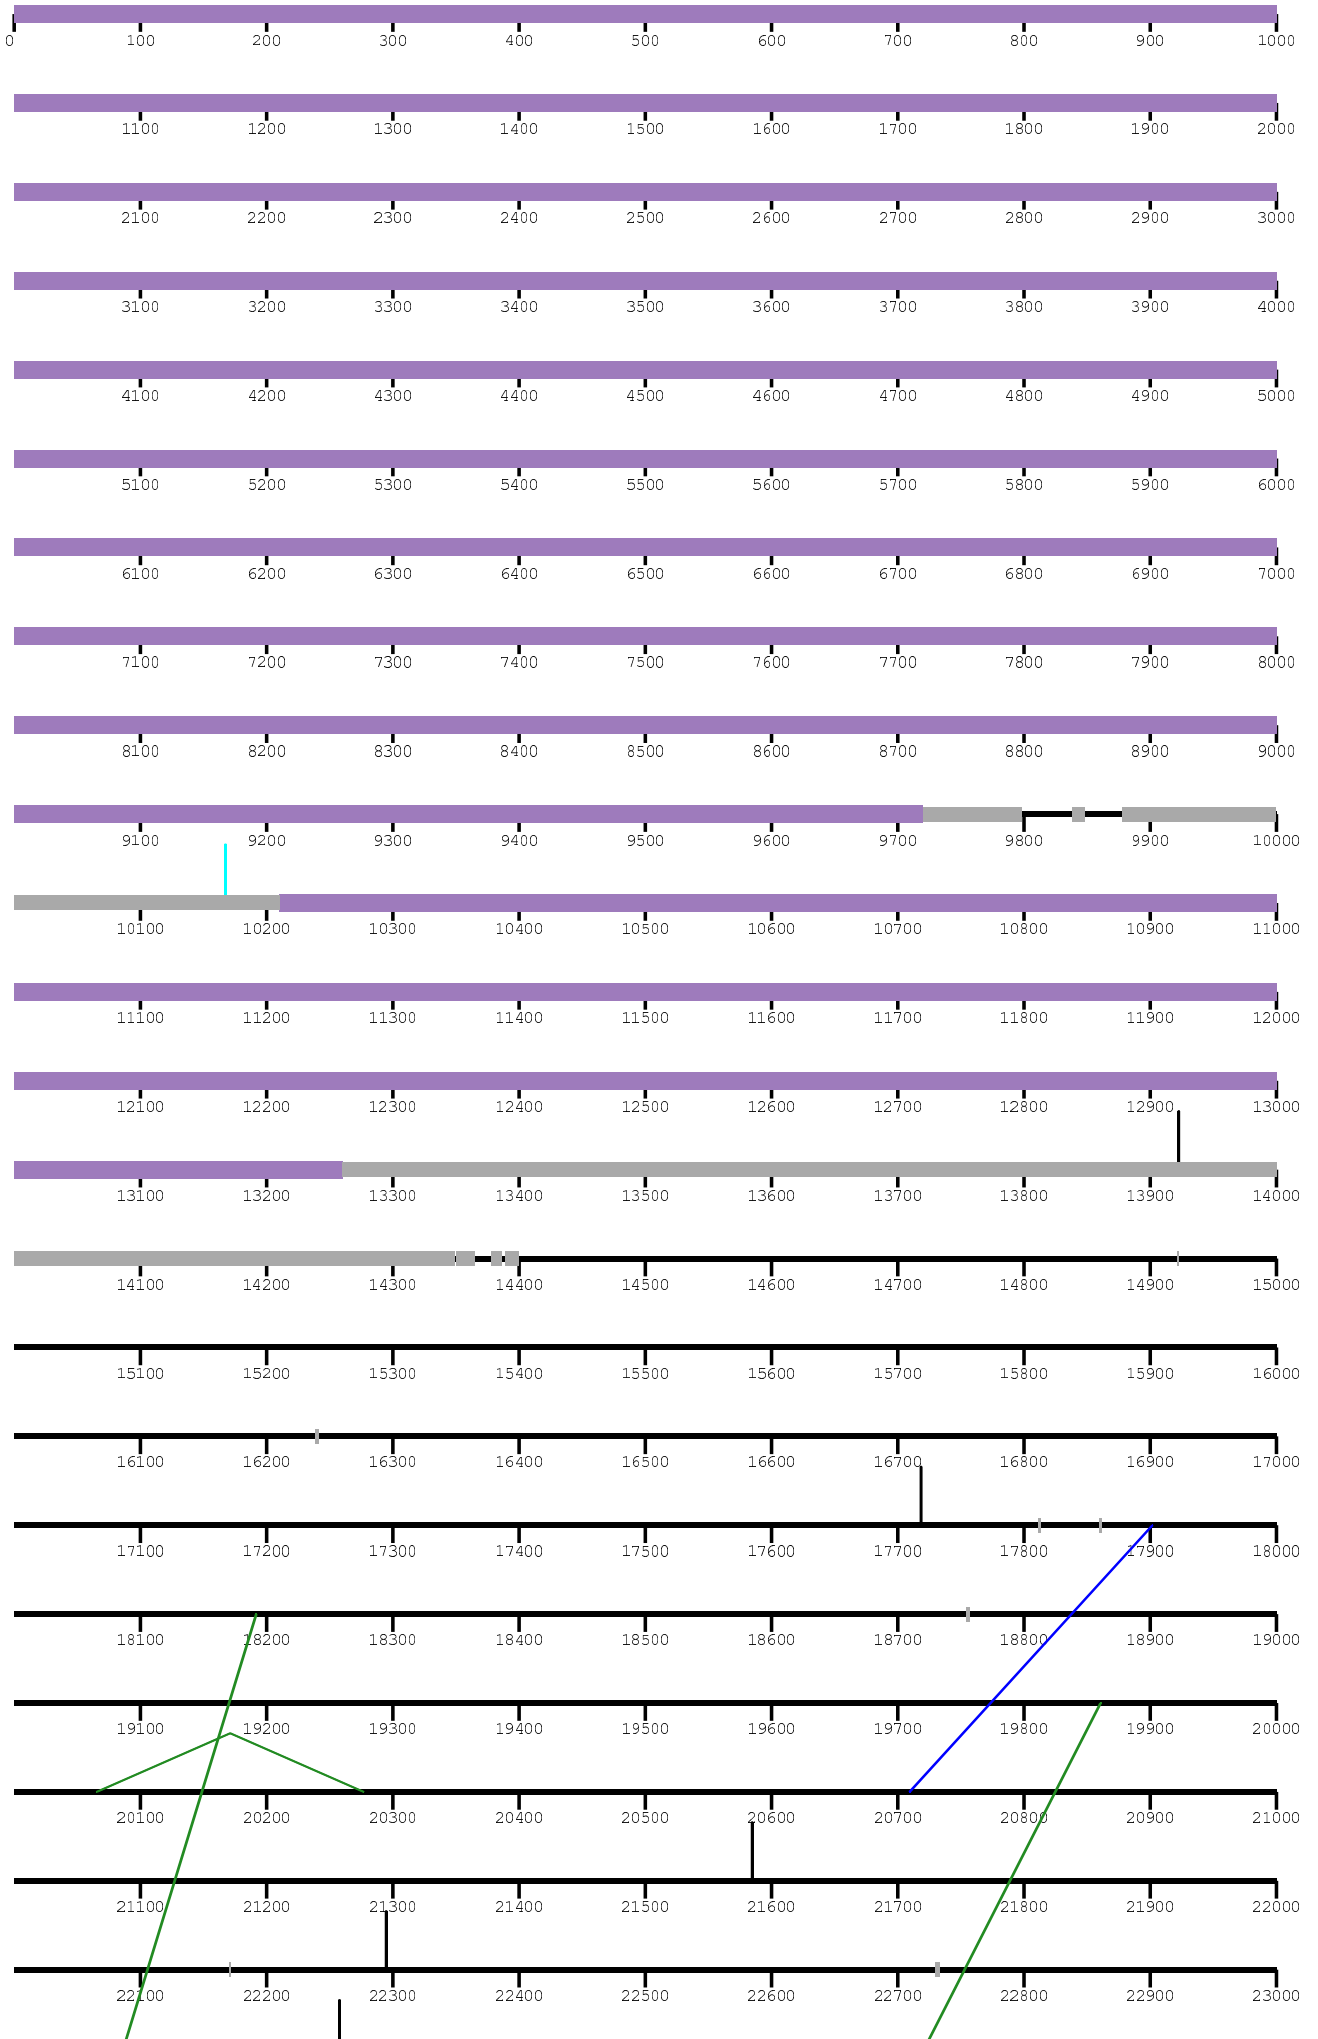

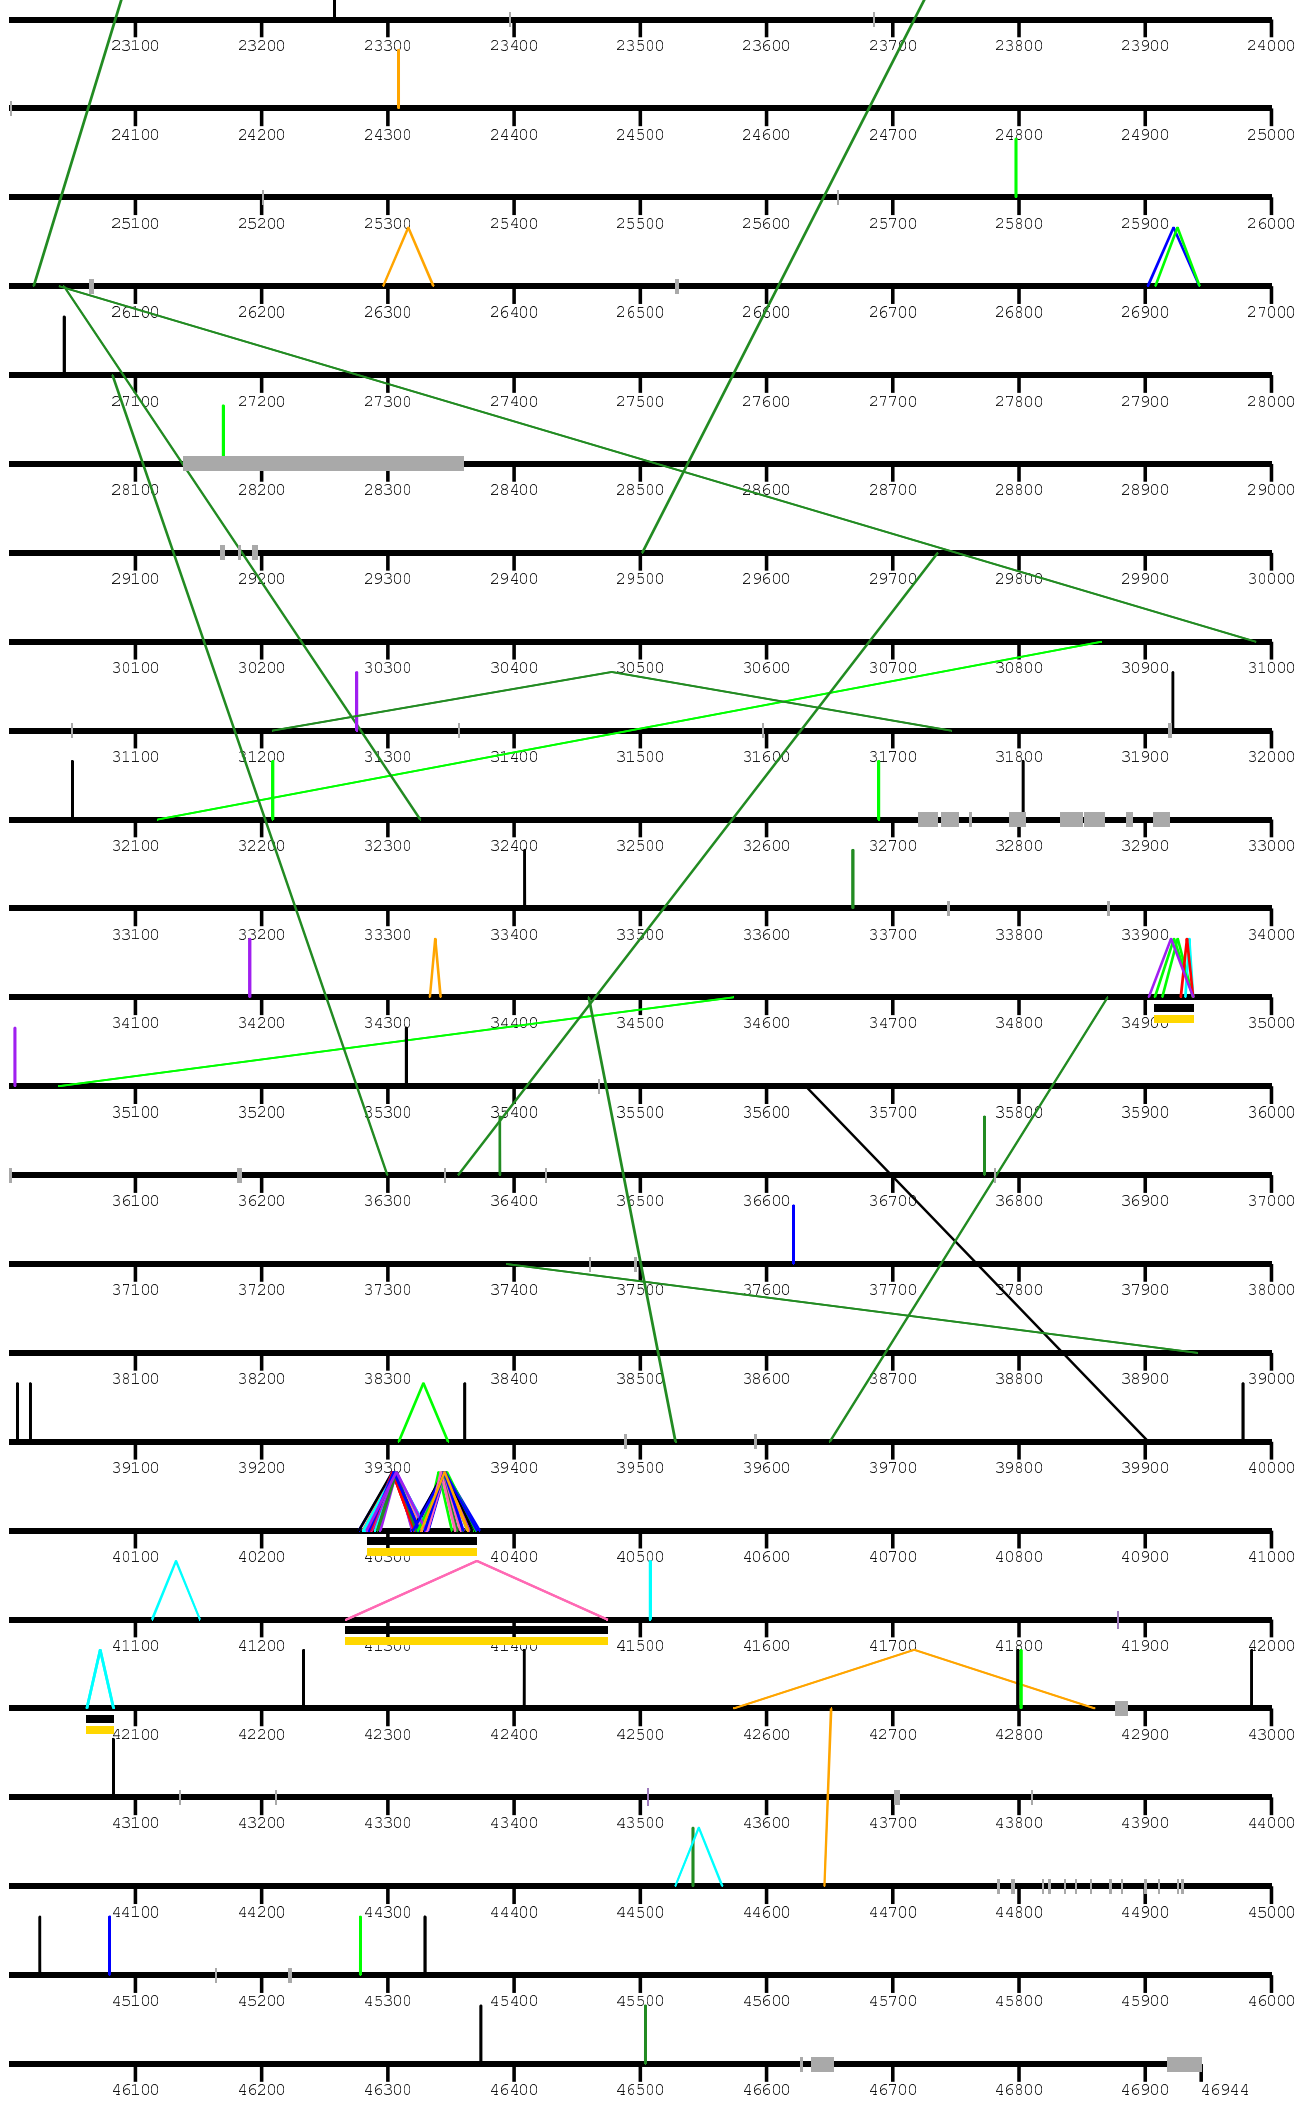

chr22

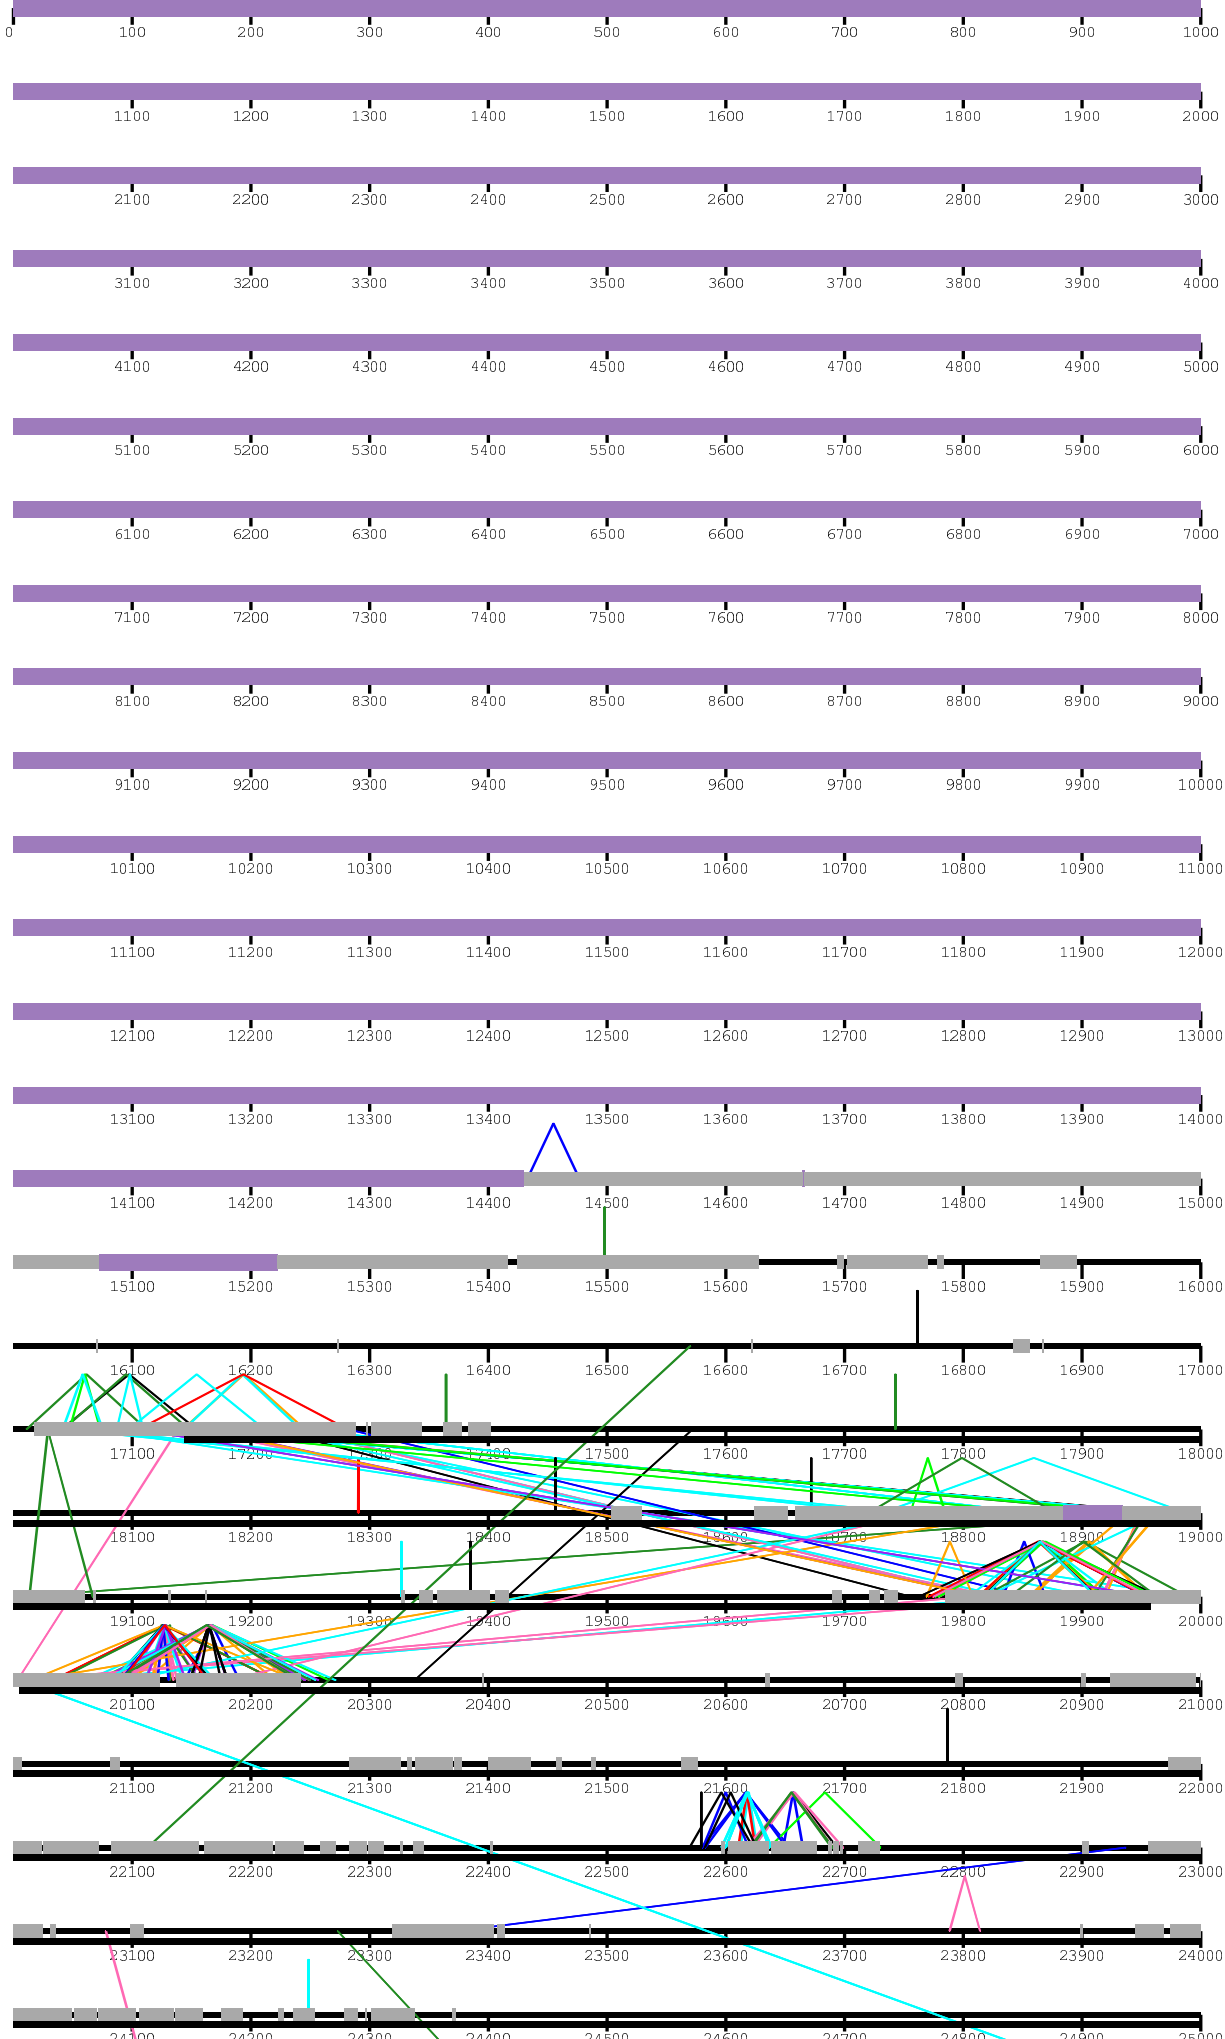

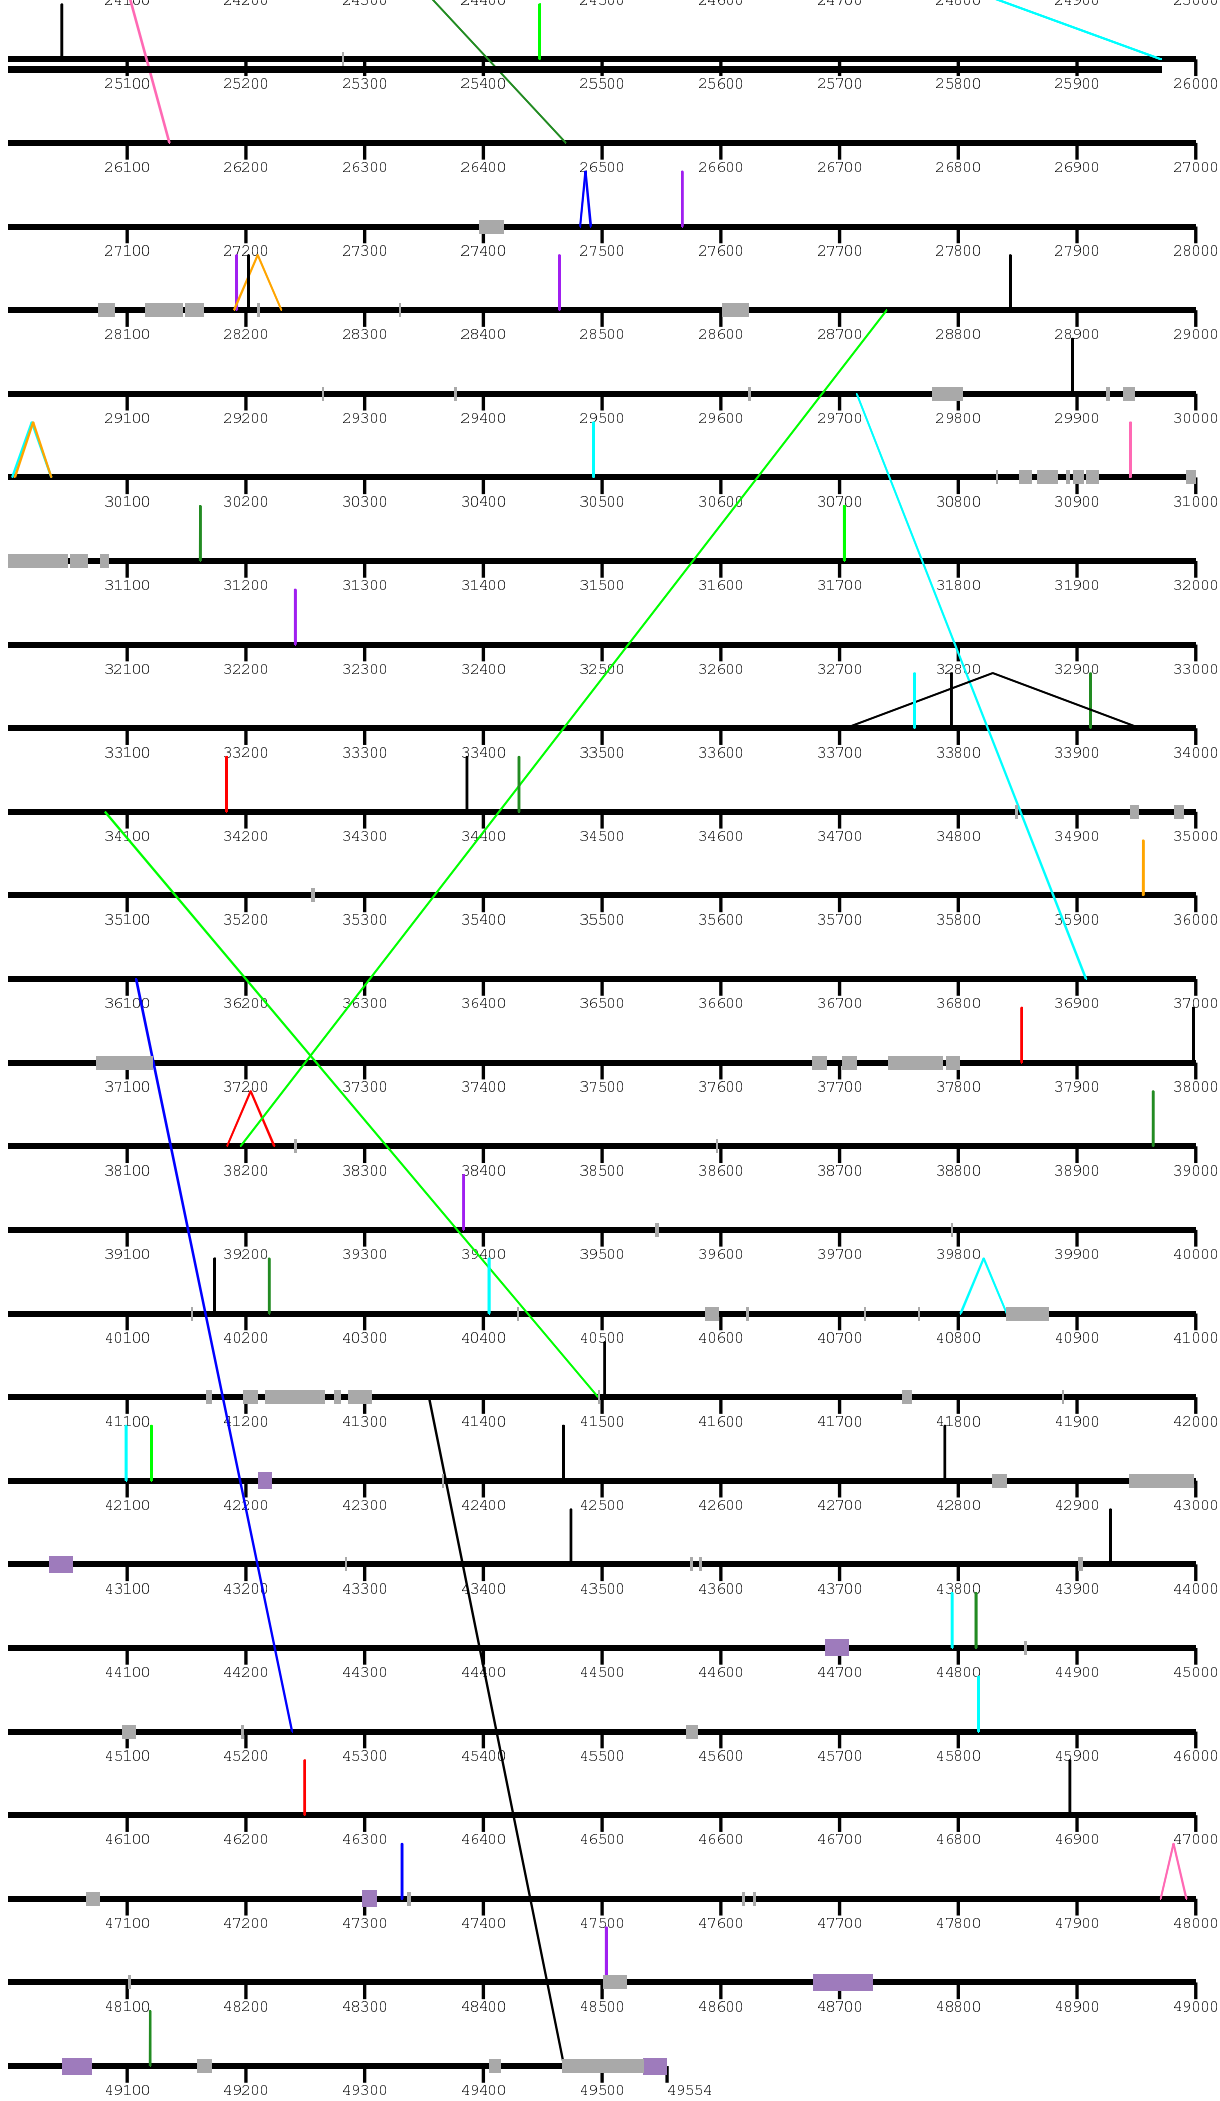

chrX

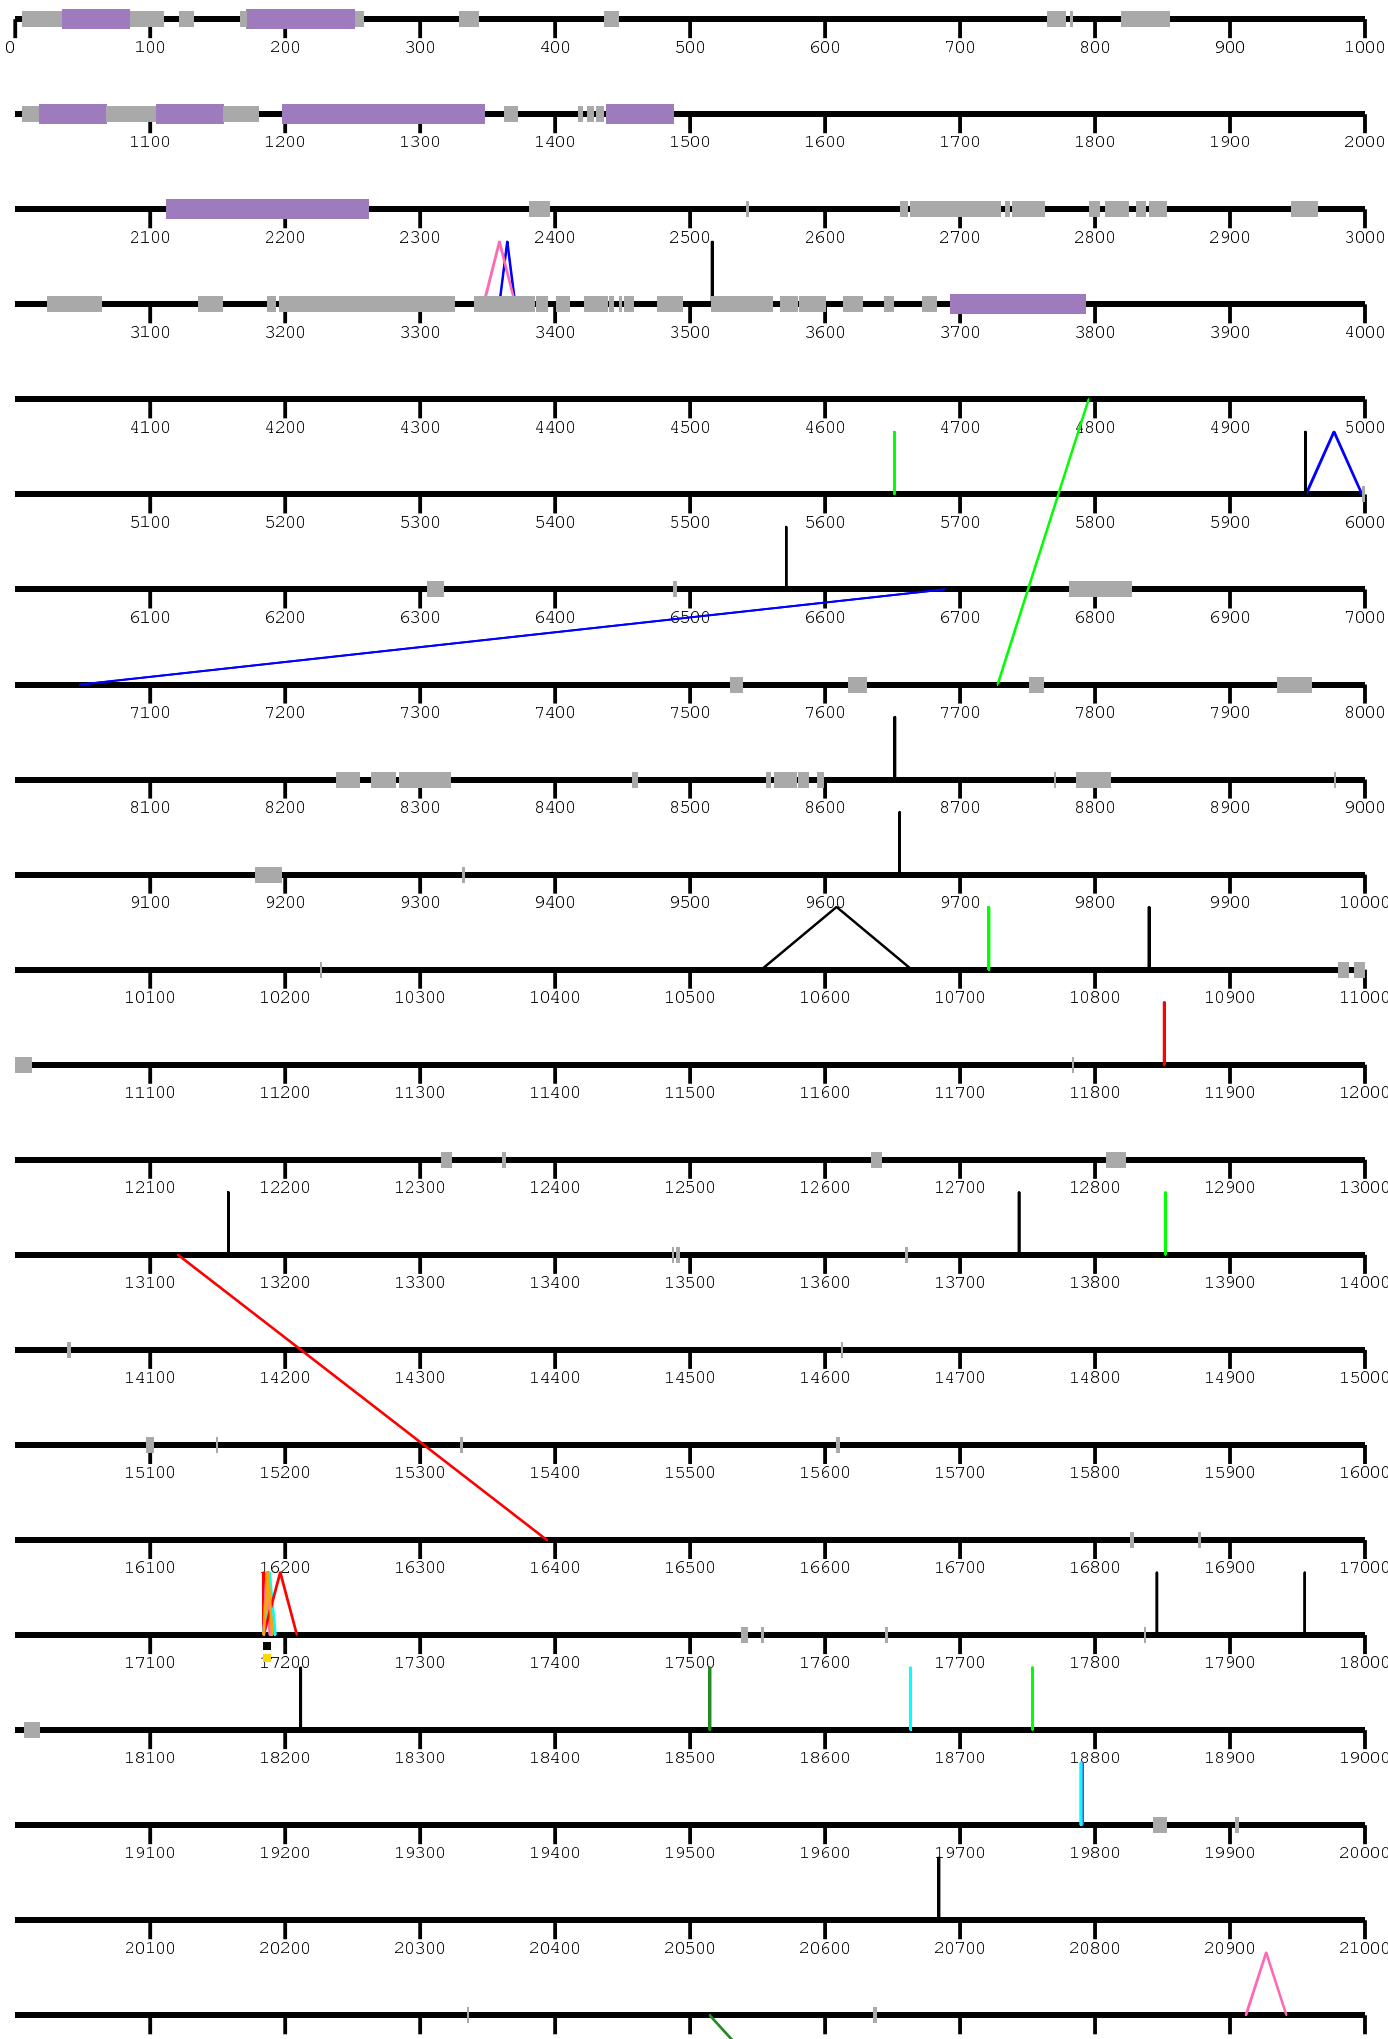

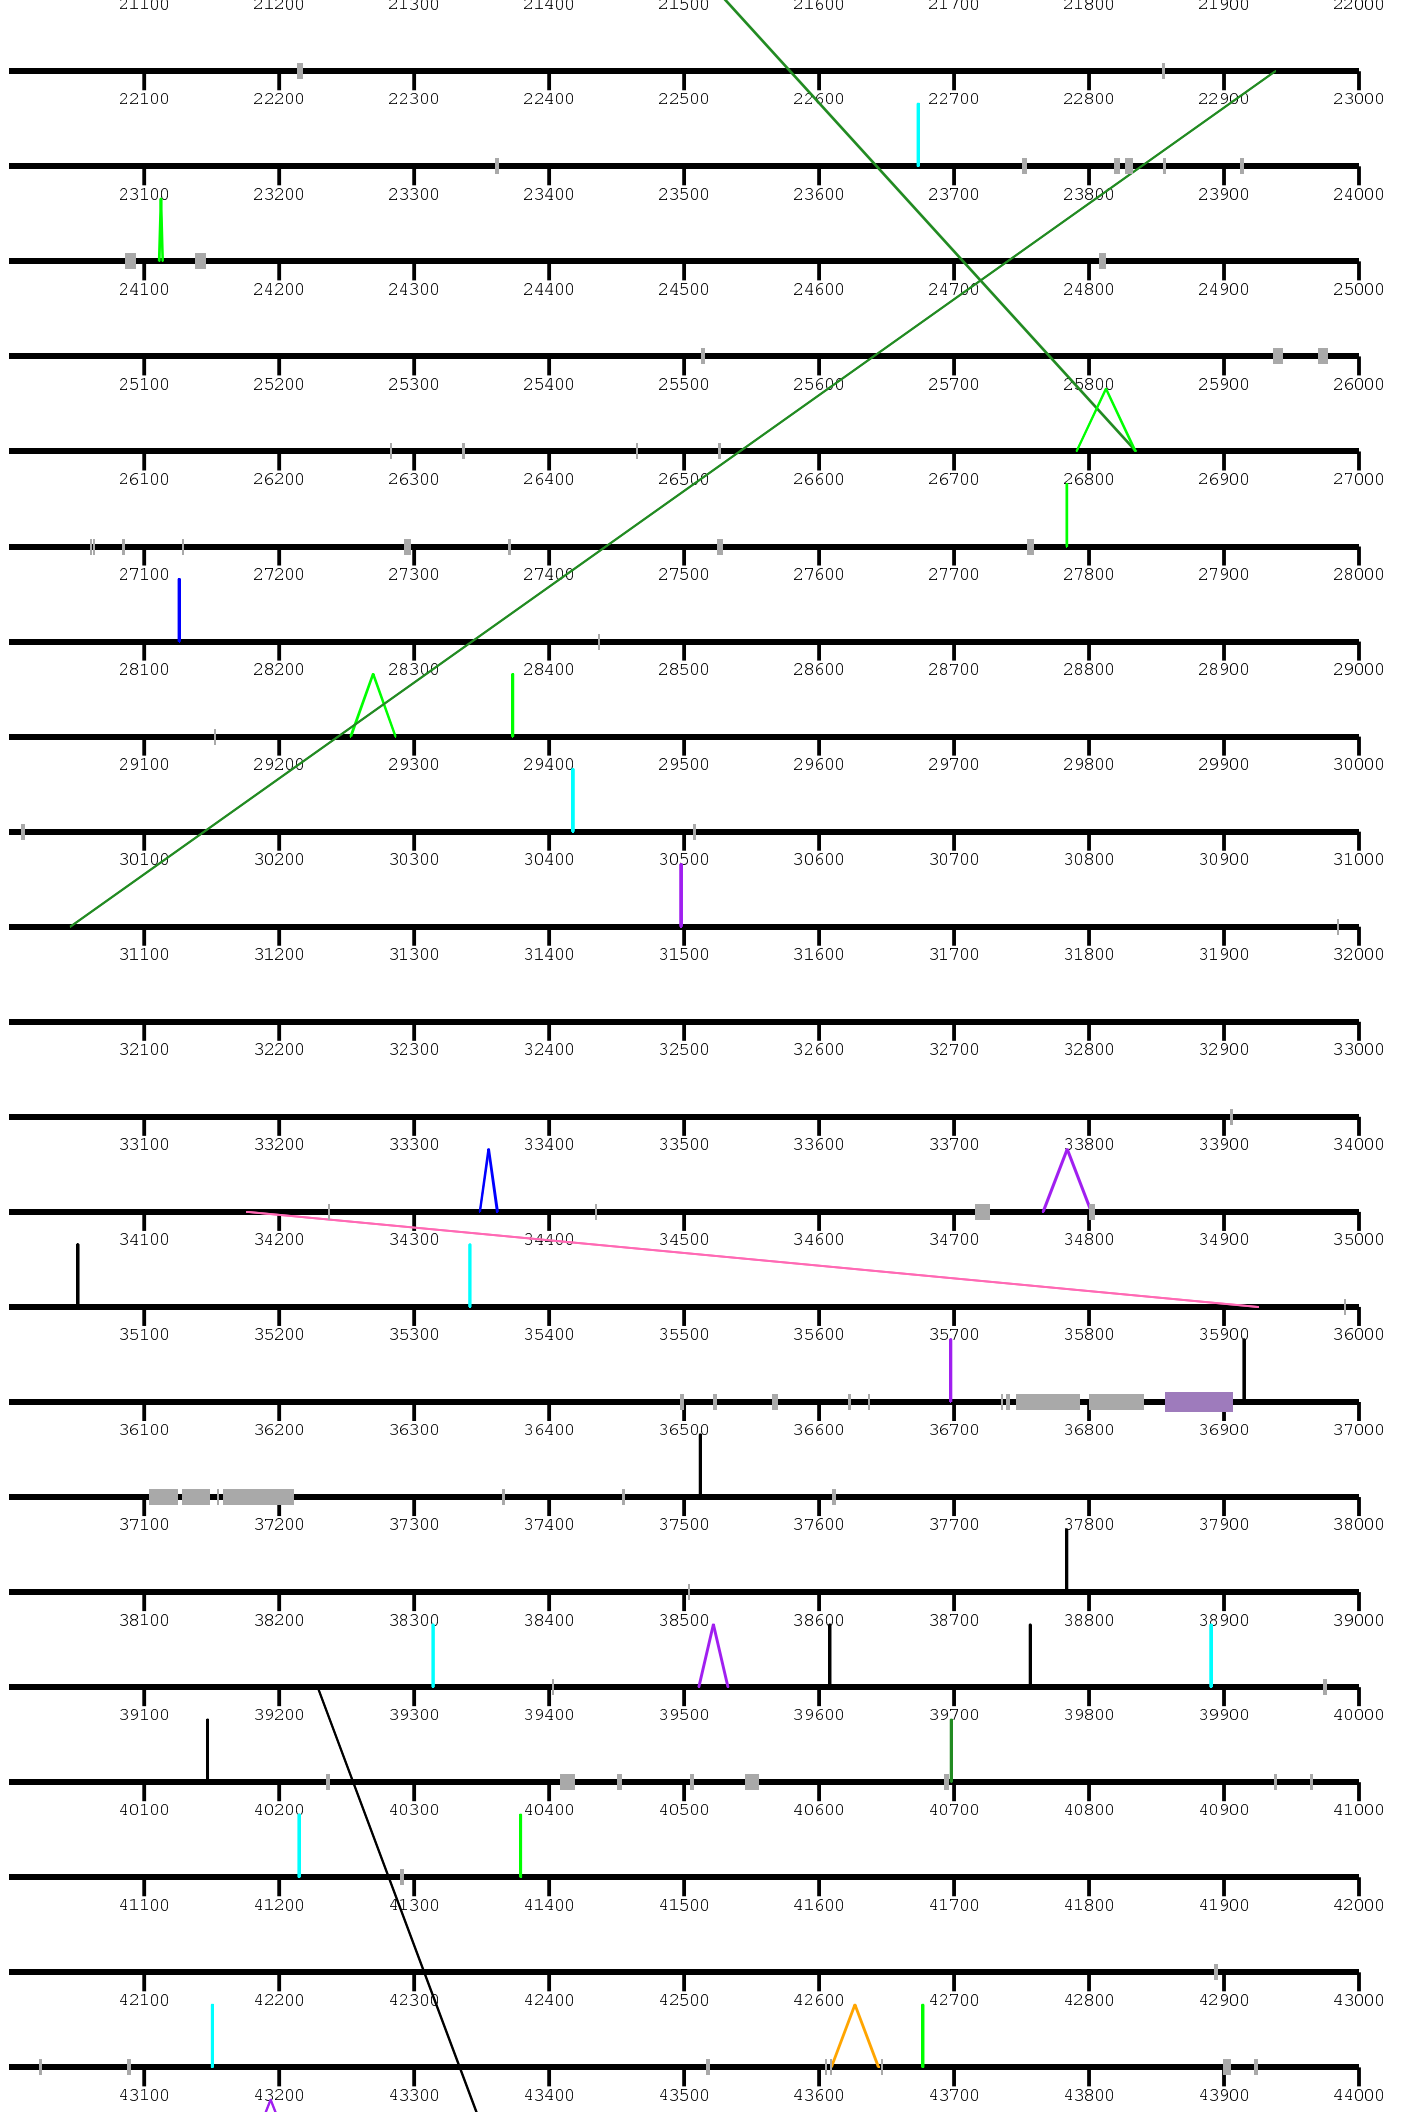

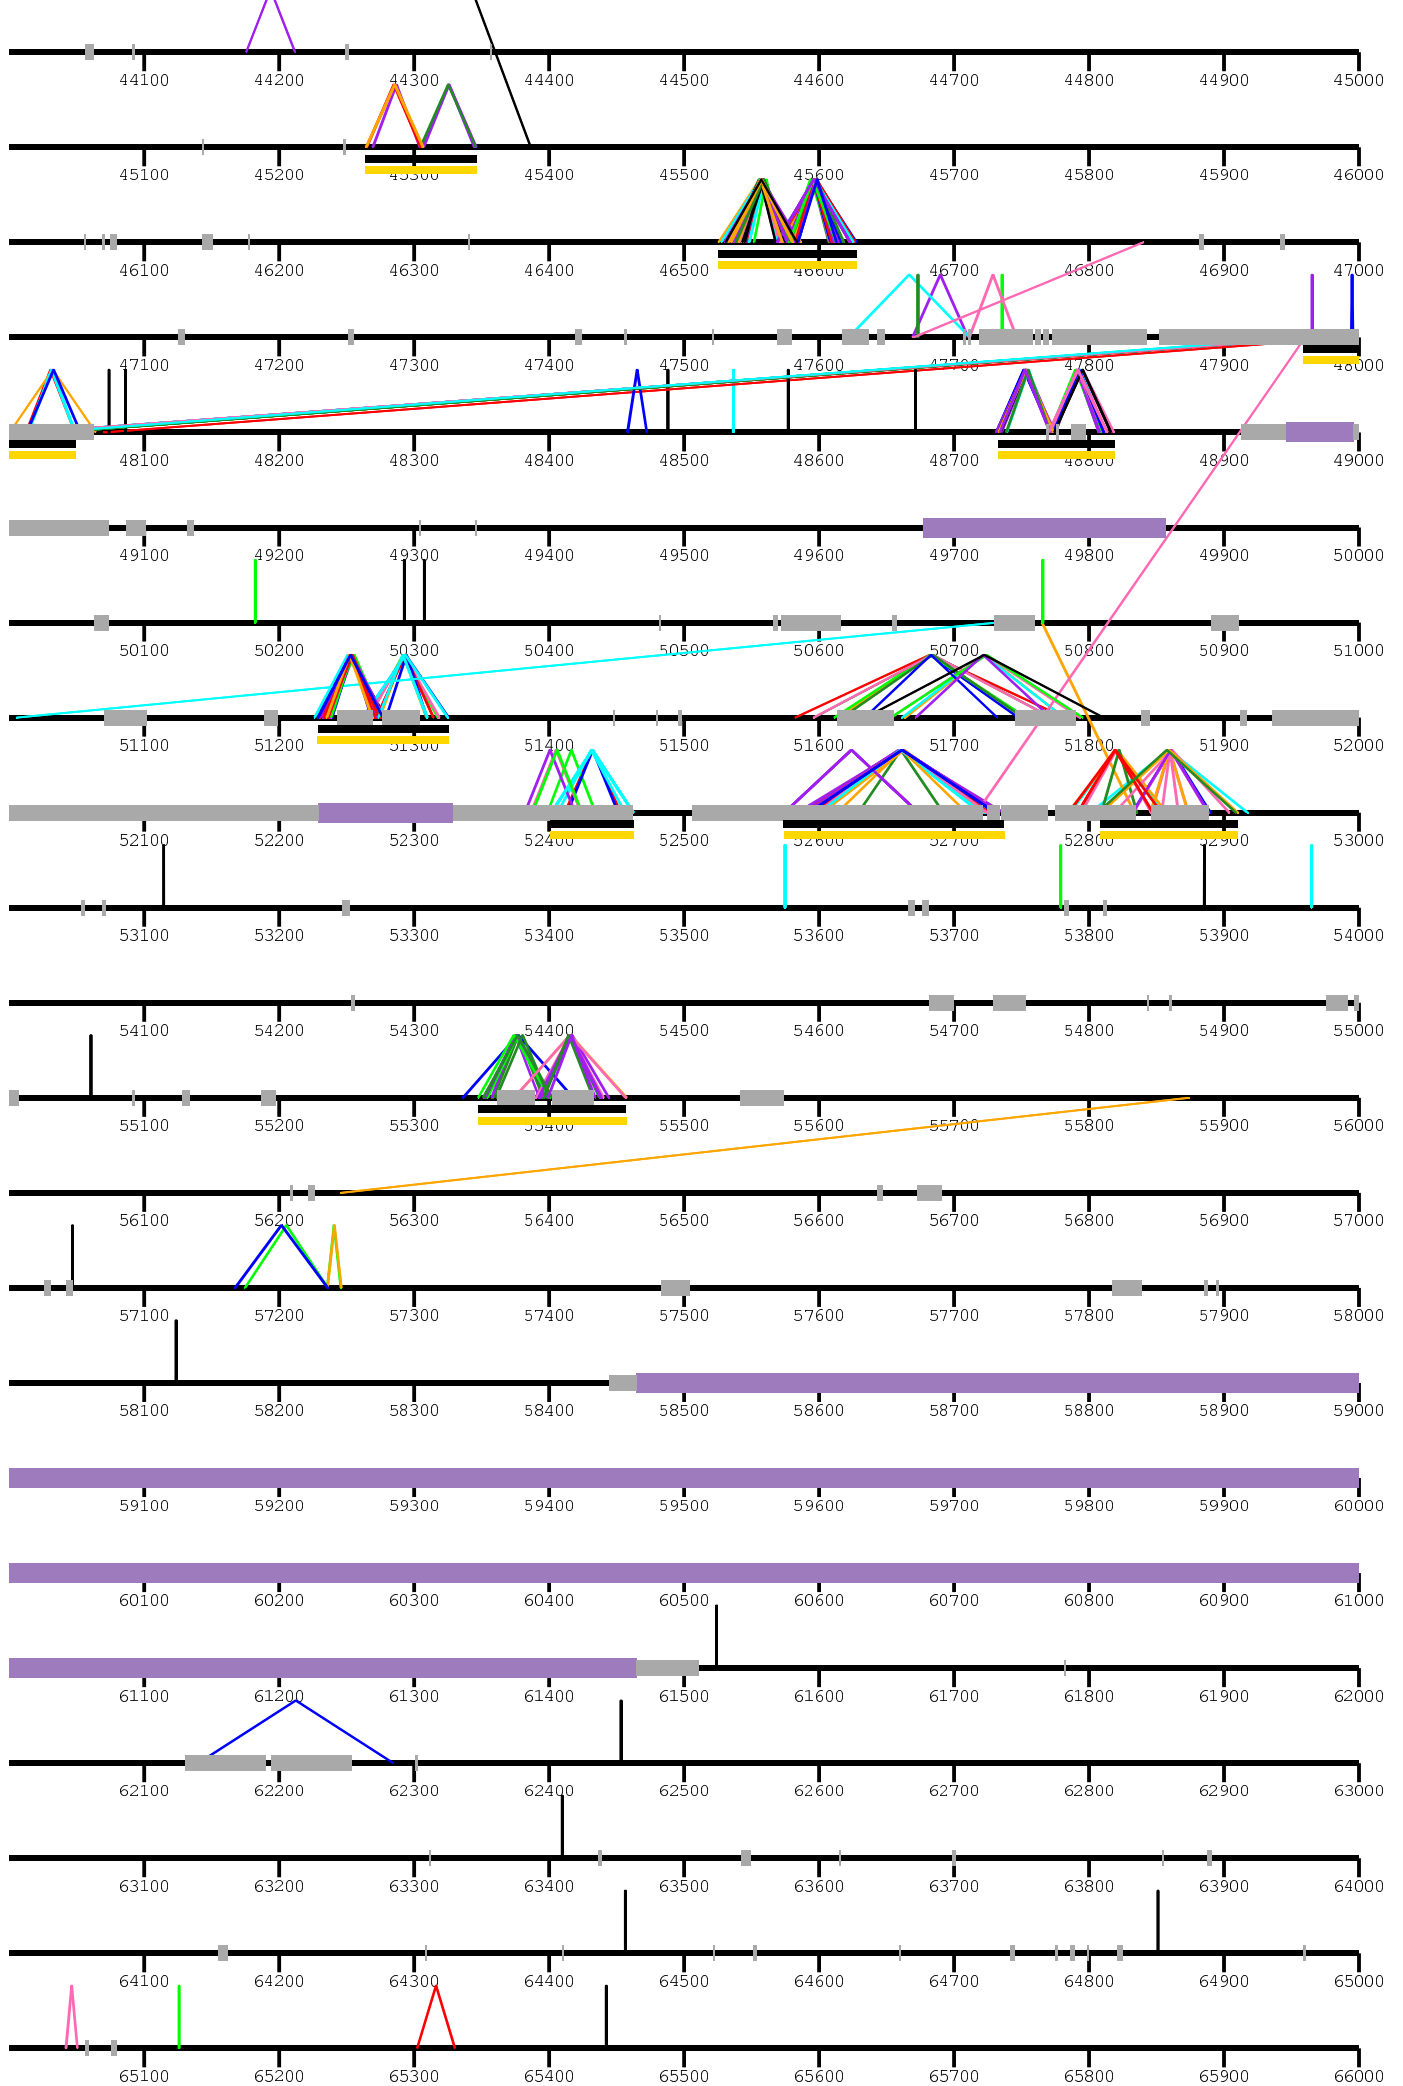



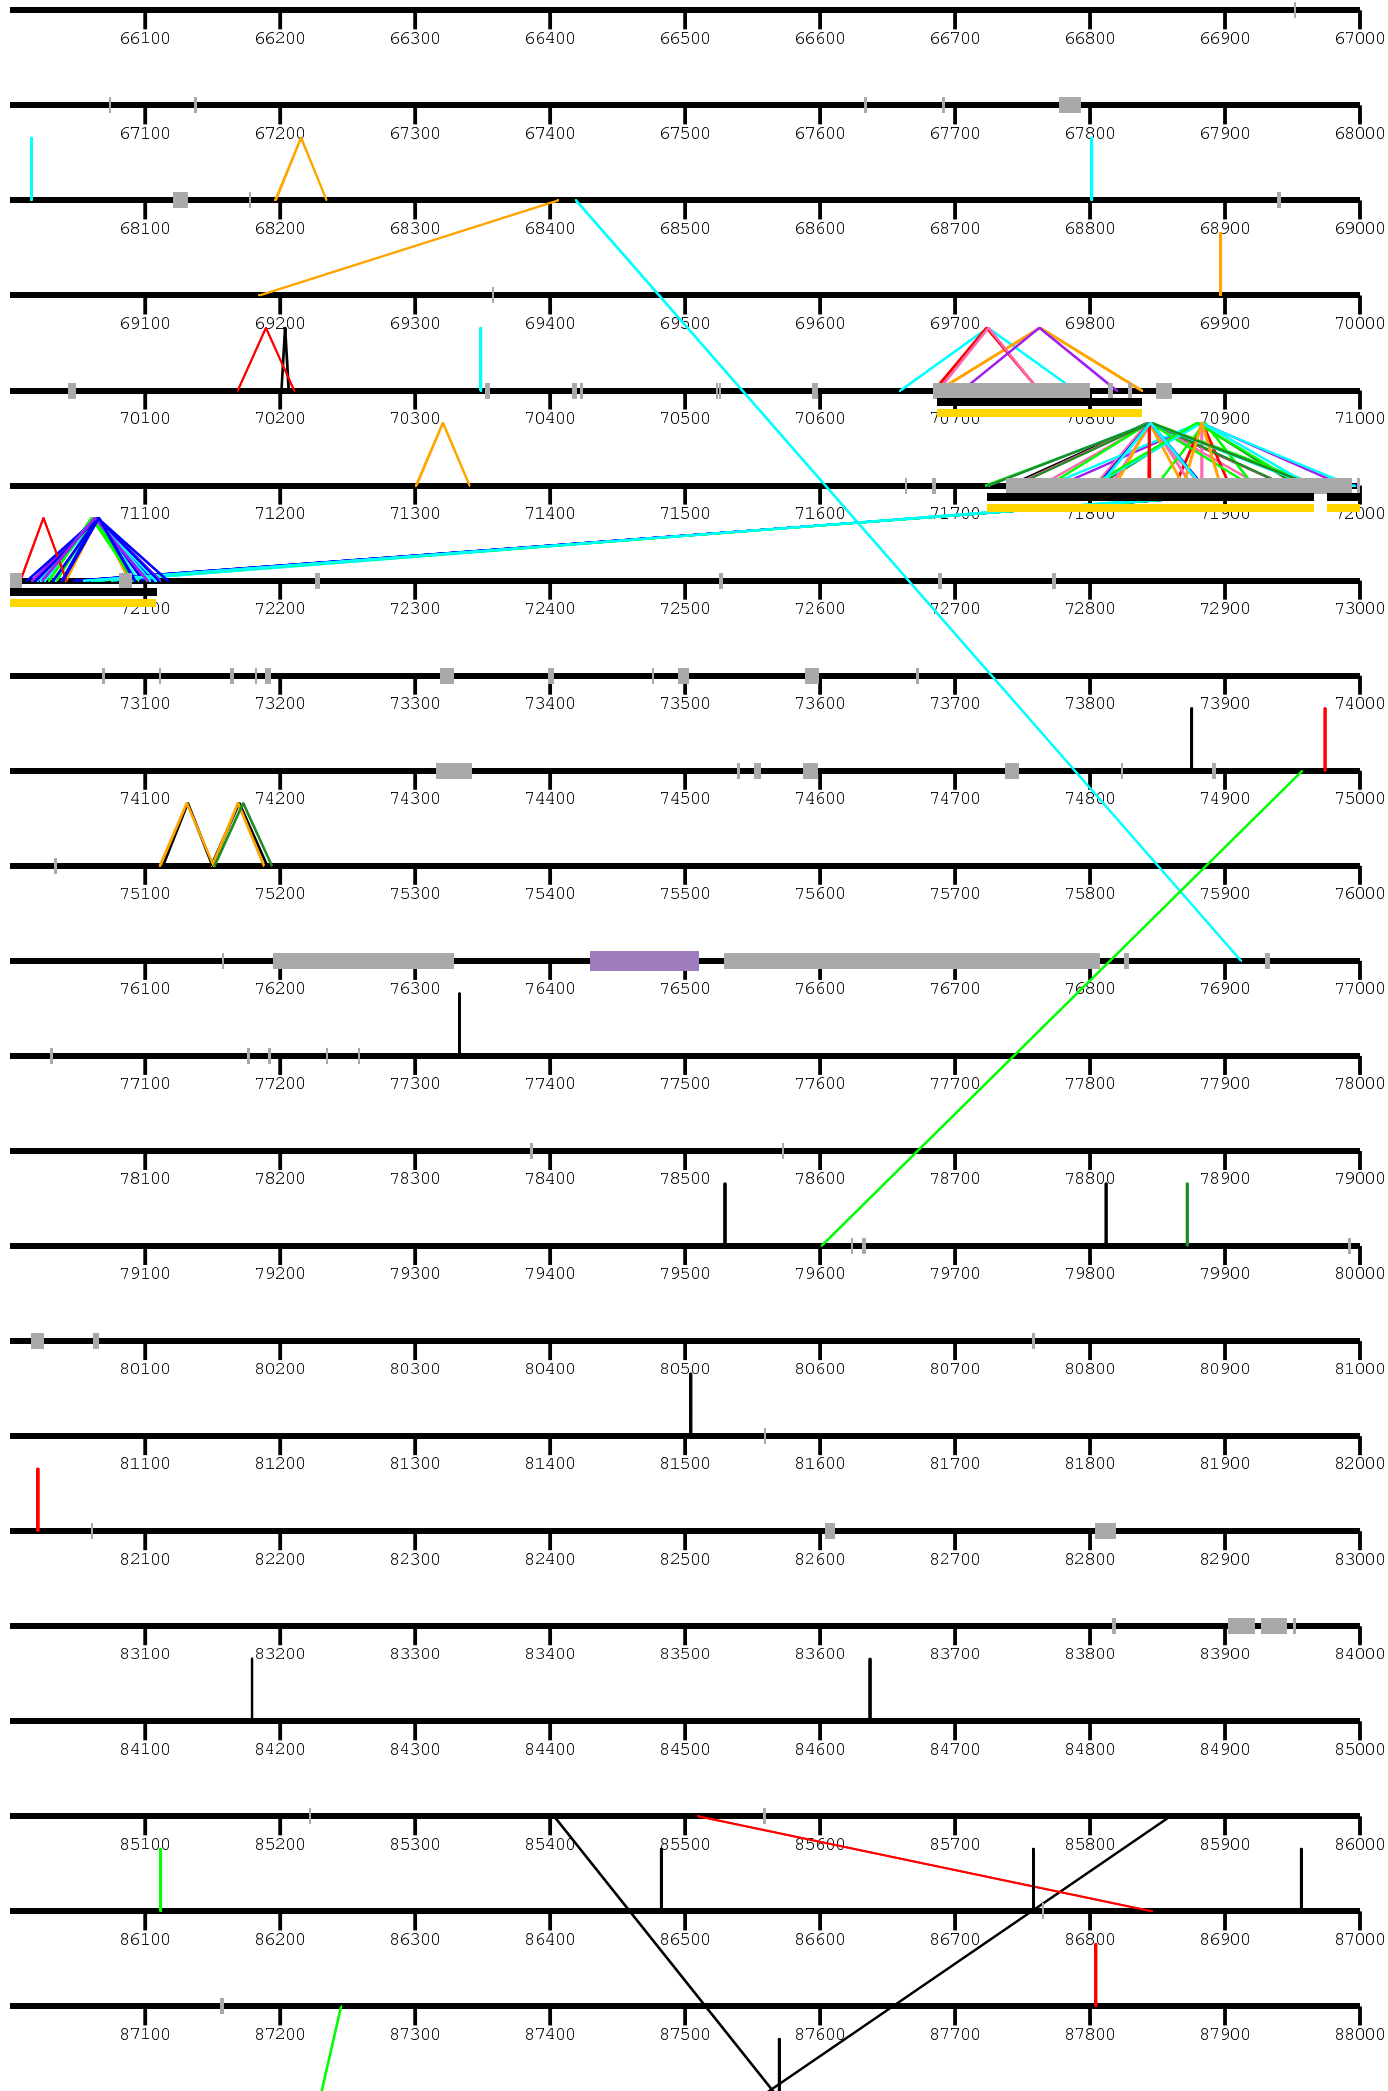

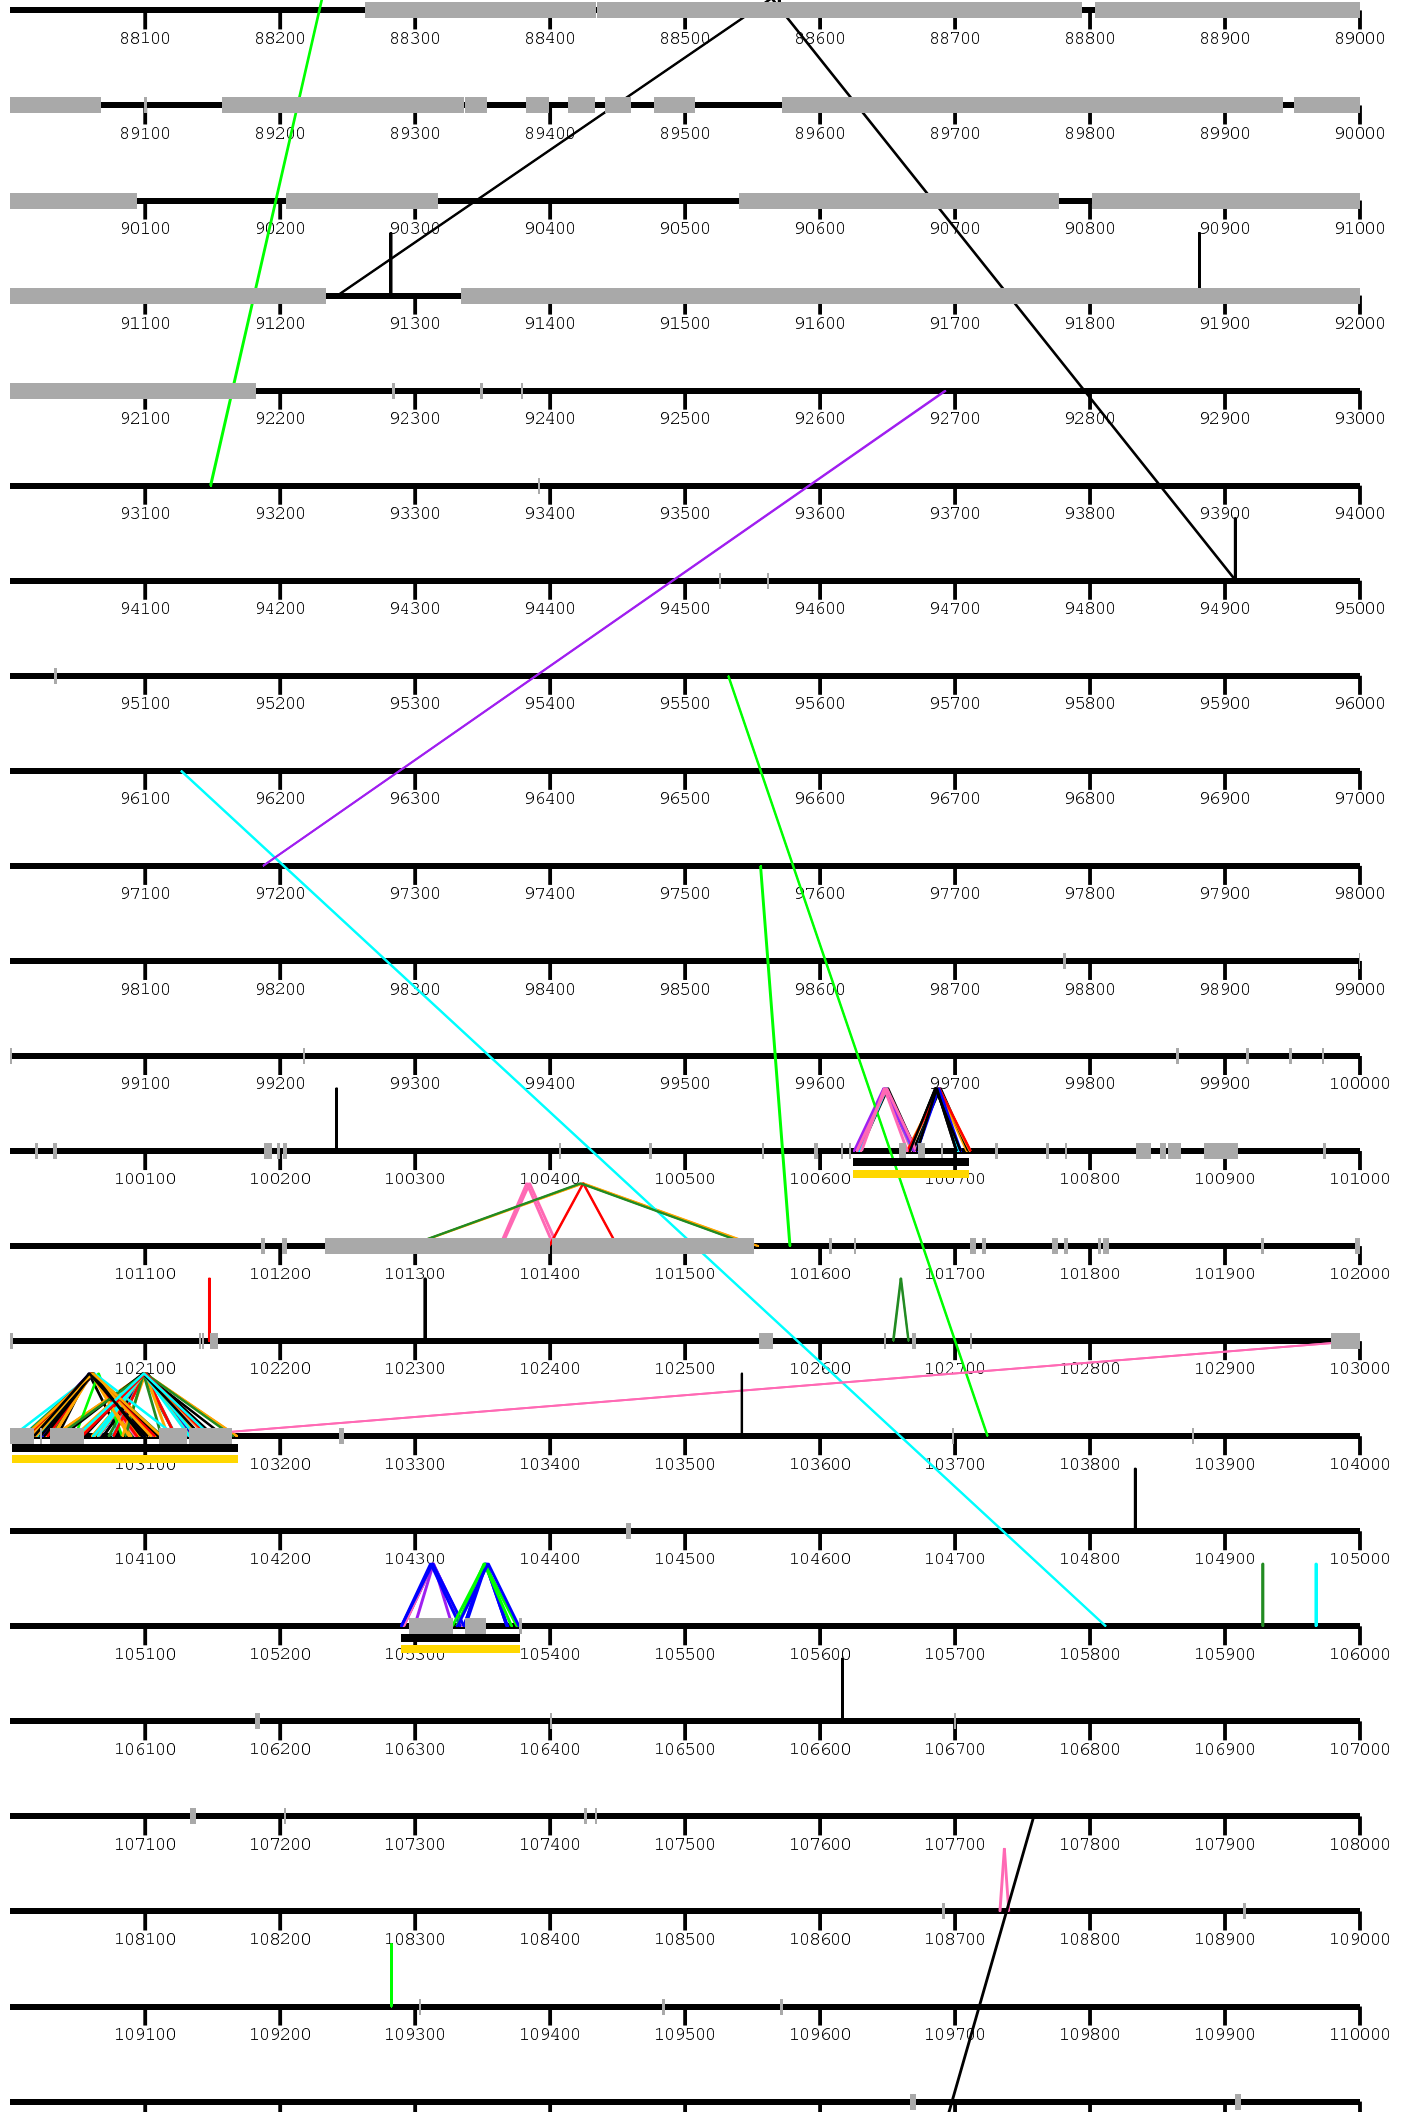

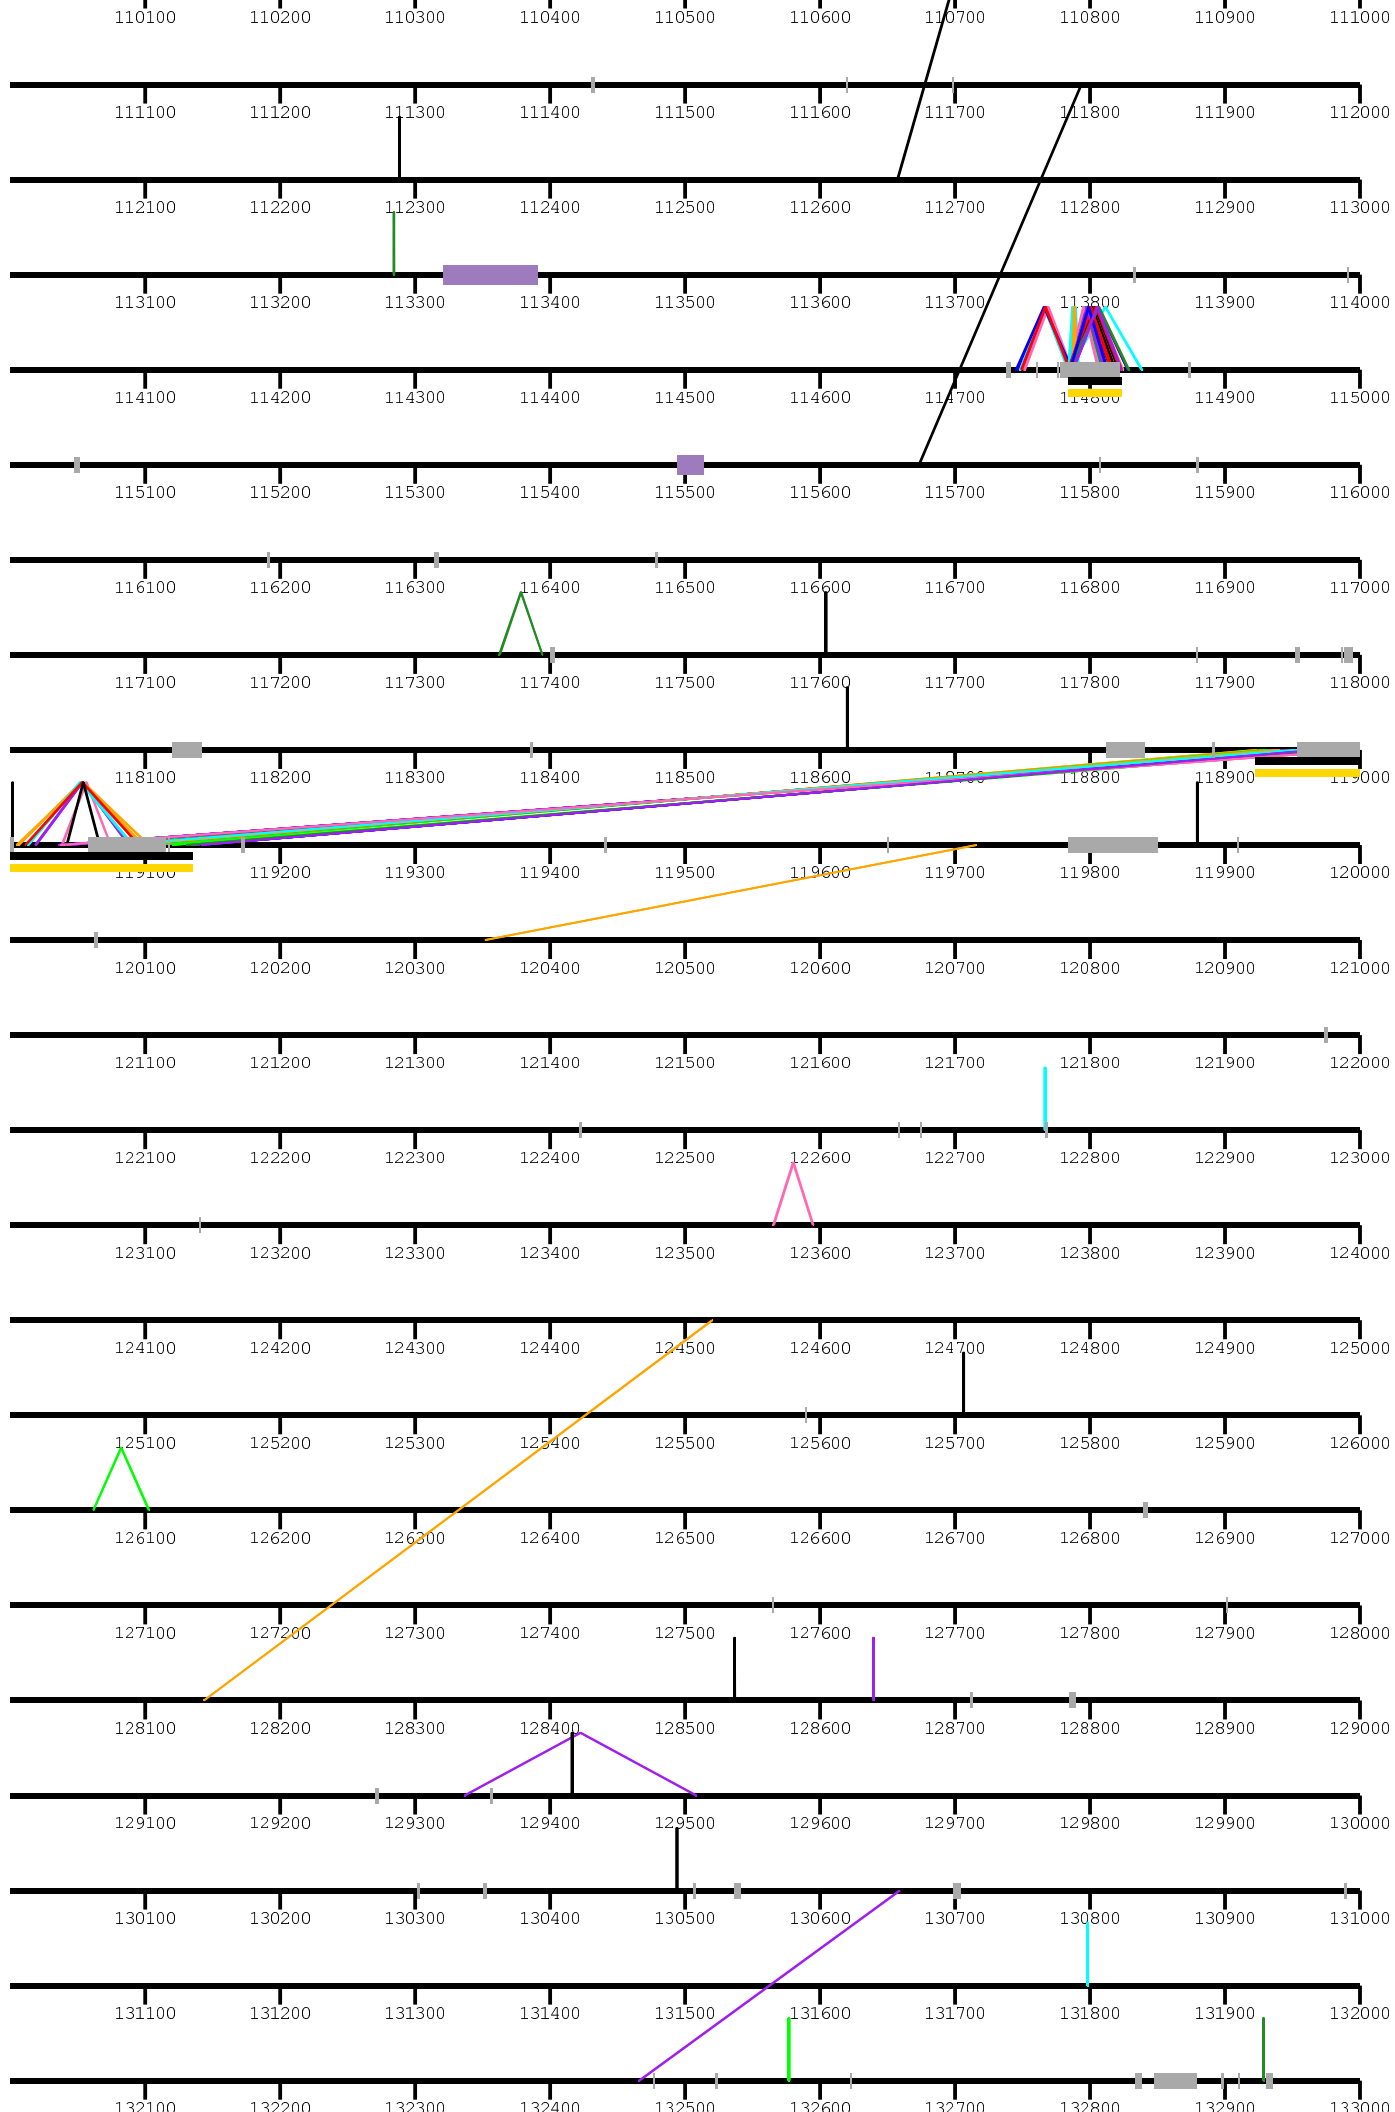

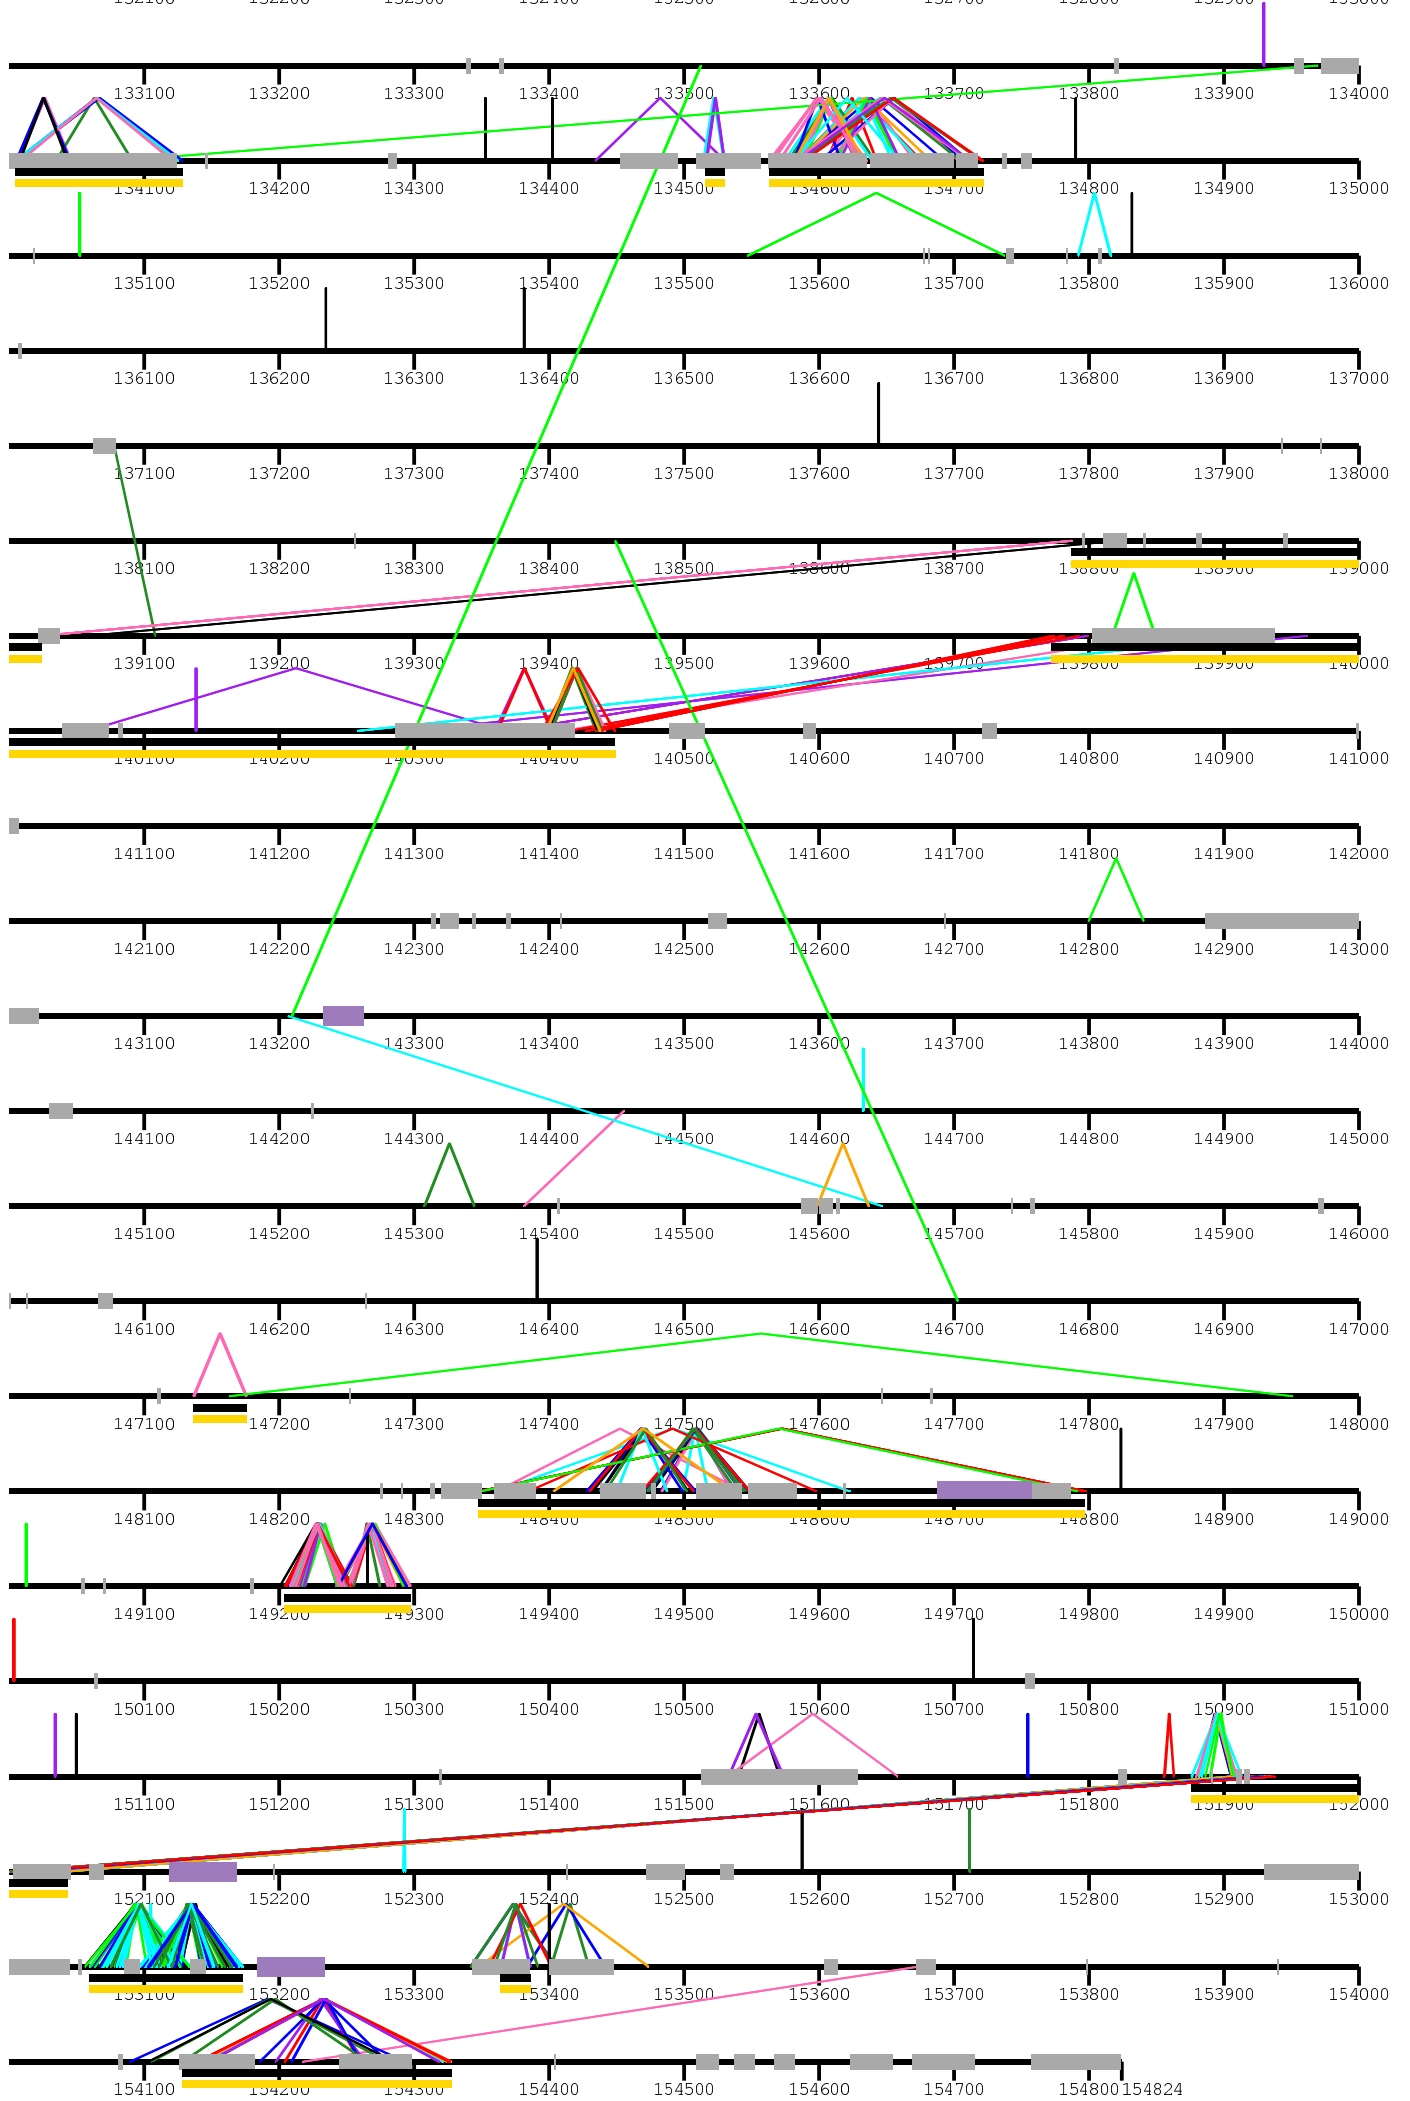

Supplement: NIHMS49728-supplement-Figure_S3c.pdf [file NIHMS49728-supplement-Figure_S3c.pdf]
